# Supplementary material for: A modular and concise approach to MIDA acylboronates via chemoselective oxidation of unsymmetrical geminal diborylalkanes: unlocking access to a novel class of acylborons
Source: PubMed Central journal article supplement — Chem Sci. 2019 Mar 21;10(17):4684–91. doi: 10.1039/c9sc00378a (PMC6495705; doi:10.1039/c9sc00378a), 2019-03-21

## Supplementary Information

### **A Modular and Concise Approach to MIDA Acylboronates via Chemoselective Oxidation of Unsymmetrical Geminal Diborylalkanes: Unlocking Access to a Novel Class of Acylborons**

*Shengjia Lin, Lucia Wang, Negin Aminoleslami, Yanting Lao, Chelsea Yagel and Abhishek Sharma\**

Department of Chemistry and Chemical Biology, Stevens Institute of Technology, Hoboken, NJ  
07030 (USA)

E-mail: [abhishek.sharma@stevens.edu](mailto:abhishek.sharma@stevens.edu)

# Table of Contents

|                                                                                          |        |
|------------------------------------------------------------------------------------------|--------|
| General Information .....                                                                | 2      |
| Experimental Section .....                                                               | 3      |
| 1. General procedure for the synthesis of symmetrical geminal diborylalkanes (2) .....   | 3-9    |
| 2. General procedure for the synthesis of unsymmetrical geminal diborylalkanes (3) ..... | 10-18  |
| 3. General procedure for the synthesis of $\alpha$ -hydroxy MIDA-boronate (4) .....      | 18-24  |
| 4. General procedure for the synthesis of MIDA acylboronate (5) .....                    | 24-29  |
| 5. X-ray Diffraction Experiments .....                                                   | 30-36  |
| 6. References .....                                                                      | 37     |
| 7. NMR spectra .....                                                                     | 38-260 |

## General Information

### Materials

All reagents were purchased from Sigma-Aldrich, Acros Organics or TCI America. Anhydrous solvents (sure seal bottles) were purchased from Sigma-Aldrich. The cationic ruthenium(II) complex [CpRu(P–N)(MeCN)]PF<sub>6</sub> (P–N: 2-PiPr<sub>2</sub>-4-*t*Bu-1-Me-imidazole) was purchased from Strem Chemicals. Reaction progress was monitored via thin-layer chromatography (TLC) using E. Merck silica gel 60 F254 TLC plates. The TLC plates were visualized under a UV lamp and/or by treatment with KMnO<sub>4</sub>. Flash column chromatography was performed using a Teledyne-Isco CombiFlash Rf purification system employing Silica gel 60 Å (230-400 or 400-632 mesh size). Chromatographic solvent systems are given as volume:volume ratios. Organic solutions were concentrated via rotary evaporation under reduced pressure with a bath temperature of 40 °C unless otherwise mentioned. All reactions were performed in oven-dried glassware under an atmosphere of dry nitrogen/argon unless otherwise mentioned.

### Apparatus

<sup>1</sup>H and <sup>13</sup>C NMR spectra were recorded on a Varian-400 (400 MHz, <sup>1</sup>H; 100 MHz, <sup>13</sup>C) spectrometer. <sup>11</sup>B and <sup>19</sup>F NMR were recorded on a Bruker Avance III 400 spectrometer (128 MHz, <sup>11</sup>B; 376 MHz, <sup>19</sup>F). The <sup>1</sup>H and <sup>13</sup>C chemical shifts are reported in parts per million (ppm) and referenced to residual chloroform, acetonitrile, dimethyl sulfoxide or methanol signal as applicable. <sup>11</sup>B chemical shifts are referenced to an external standard of BF<sub>3</sub>·Et<sub>2</sub>O (δ = 0 ppm). <sup>19</sup>F chemical shifts are referenced to an external standard of 0.05% C<sub>6</sub>H<sub>5</sub>CF<sub>3</sub> in CDCl<sub>3</sub>. The following abbreviations are used to designate chemical shift multiplicities: s = singlet, br s = broad singlet, d = doublet, dd = double doublet, t = triplet, m = multiplet, q = quartet. All <sup>13</sup>C NMR spectra are proton decoupled. *The carbon atoms connected to boron atom (C-B) were not detected in <sup>13</sup>C NMR (due to quadrupolar relaxation).* NMR spectra were processed using MestReNova software. High resolution mass spectra (HRMS) were obtained at the Center for Mass Spectrometry at Stevens Institute of Technology using a Micromass Q-ToF. Melting points were measured on a IA9000 series Digital Melting Point Apparatus and are uncorrected.

### Single crystal X-ray diffraction

Data for all compounds was collected on an Agilent SuperNova diffractometer at Columbia University using mirror-monochromated Cu Kα radiation. Data collection, integration, scaling (ABSPACK) and absorption correction (face-indexed Gaussian integration<sup>1</sup>) were performed in CrysAlisPro.<sup>2</sup> Structure solution was performed using ShelXT.<sup>3</sup> Subsequent refinement was performed by full-matrix least-squares on F<sup>2</sup> in ShelXL.<sup>4</sup> Olex2<sup>5</sup> was used for viewing and to prepare CIF files. ORTEP graphics were prepared in CrystalMaker.<sup>6</sup> Thermal ellipsoids are rendered at the 50% probability level.

## Experimental Section

### 1. Procedure for the synthesis of symmetrical geminal diborylalkanes (2)

#### General procedure A

A mixture of CuCl (0.05 equiv), KO<sup>t</sup>Bu (0.1 equiv), and Xantphos (0.06 equiv) in anhydrous toluene (2 mL) was stirred for 15 min in a round bottom flask.<sup>7</sup> Thereafter, pinacolborane (2.4 equiv) was added and the reaction mixture was stirred for 10 min at 23 °C. The alkyne substrate (1.6 mmol) was added and the reaction mixture stirred at 23 °C. After 15 h, the reaction mixture was filtered through a pad of Celite and concentrated. The resulting residue was subjected to flash column chromatography (silica gel; EtOAc/hexanes, 0:10 to 5:95) to obtain the pure product.

#### General procedure B

A mixture of CuCl (0.05 equiv), KO<sup>t</sup>Bu (0.1 equiv), and Xantphos (0.06 equiv) in anhydrous toluene (2 mL) was stirred for 15 min in a round bottom flask under a nitrogen atmosphere.<sup>7</sup> Pinacolborane (1.2 eq) was added to the reaction, and the mixture was stirred for 10 min at 23 °C. Thereafter, vinyl boronic acid pinacol ester (2.0 mmol) was added and the reaction mixture stirred at 23 °C. After 15 h, the reaction mixture was filtered through a pad of Celite and concentrated. The resulting residue was subjected to flash column chromatography (silica gel; EtOAc/hexanes, 0:10 to 5:95) to obtain the pure product.

#### Synthesis of 2p and 2q

Synthesis of 6-iodohex-1-yne (6): To an oven dried round bottom flask, 6-chlorohex-1-yne (10 mmol), sodium iodide (2 equiv) and 2-butanone (10 mL) were added. The flask was capped with rubber septum, evacuated and filled back with nitrogen (three cycles). Reaction was allowed to stirred at 85 °C for 15 h, then concentrated. The resulting crude was diluted with DCM and washed with water, then dried over Na<sub>2</sub>SO<sub>4</sub> and evaporated to dryness. The crude product was used as such without further purification in the following step.

To a reaction vial equipped with a stir bar, diborylmethane (1 equiv) and THF (3 mL) were added. The vessel was evacuated and filled with nitrogen (three cycles).<sup>8</sup> LDA (1.1 equiv) was added via syringe at 0 °C. The mixture was stirred for 5 min, then alkenyl or alkynyl halide (3.0 mmol) was added. The reaction mixture was allowed to reach room temperature (23 °C) while stirring for 2 h, then diluted with EtOAc and washed with NH<sub>4</sub>Cl. The organic layer was dried over Na<sub>2</sub>SO<sub>4</sub>, filtered and concentrated on vacuo, further purified by column chromatography (silica gel; EtOAc/hexanes, 0:10 to 5:95).

#### Synthesis of 2t

A 25 mL 3-neck flask was charged with B<sub>2</sub>Pin<sub>2</sub> (2.5 equiv) and K<sub>2</sub>CO<sub>3</sub> (0.6 equiv). The flask was evacuated and filled with nitrogen for three cycles. Et<sub>2</sub>O (3 mL), alkyne (1 mmol) and CH<sub>3</sub>OH (5



equiv) were added. The reaction was allowed to stir at 50 °C for 15 hours. Upon completion, the reaction mixture was diluted with ethyl acetate, filtered through a silica gel plug, rinsed with ethyl acetate, and concentrated in vacuo. The crude reaction mixture was purified on silica gel to afford the desired product.<sup>9</sup>

**2,2'-(2-phenylethane-1,1-diyl)bis(4,4,5,5-tetramethyl-1,3,2-dioxaborolane) (2a)<sup>10</sup>**

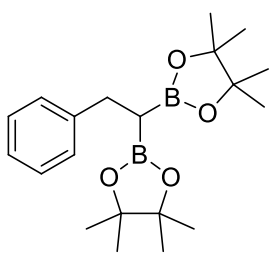

Following general procedure B; White solid; 65% yield.

$R_f$  (EtOAc/Hexane, 1:9) = 0.50.

<sup>1</sup>H NMR (400 MHz, CDCl<sub>3</sub>) δ 7.23 – 7.18 (m, 4H), 7.12 – 7.08 (m, 1H), 2.88 (d,  $J$  = 8.3 Hz, 2H), 1.18 – 1.16 (m, 25H).

<sup>13</sup>C NMR (100 MHz, CDCl<sub>3</sub>) δ 144.6, 128.5, 128.1, 125.5, 83.2, 31.4, 24.9, 24.7.

<sup>11</sup>B NMR (128 MHz, CDCl<sub>3</sub>) δ 33.52.

Melting point: 44 – 45 °C.

**2,2'-(2-(p-tolyl)ethane-1,1-diyl)bis(4,4,5,5-tetramethyl-1,3,2-dioxaborolane) (2b)<sup>10</sup>**

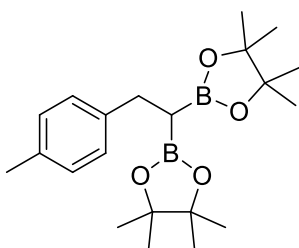

Following general procedure A; White solid; 67% yield.

$R_f$  (EtOAc/Hexane, 1:9) = 0.50.

<sup>1</sup>H NMR (400 MHz, CDCl<sub>3</sub>) δ 7.12 (d,  $J$  = 7.7 Hz, 2H), 7.02 (d,  $J$  = 7.7 Hz, 2H), 2.84 (d,  $J$  = 8.2 Hz, 2H), 2.28 (s, 3H), 1.21 – 1.15 (m, 25H).

<sup>13</sup>C NMR (100 MHz, CDCl<sub>3</sub>) δ 141.4, 134.6, 128.7, 128.2, 83.1, 30.9, 24.9, 24.6, 21.0.

<sup>11</sup>B NMR (128 MHz, CDCl<sub>3</sub>) δ 33.85.

Melting point: 47 – 49 °C.

**2,2'-(2-(o-tolyl)ethane-1,1-diyl)bis(4,4,5,5-tetramethyl-1,3,2-dioxaborolane) (2c)<sup>10</sup>**

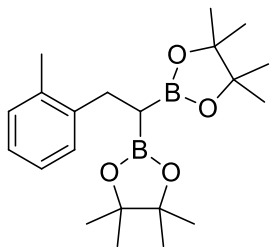

Following general procedure A; Sticky solid; 60% yield.

$R_f$  (EtOAc/Hexane, 1:9) = 0.50.

<sup>1</sup>H NMR (400 MHz, CDCl<sub>3</sub>) δ 7.21 (d,  $J$  = 6.9 Hz, 1H), 7.05 – 6.95 (m, 3H), 3.07 (s, 2H), 2.33 (s, 3H), 1.16 (br s, 25H).

<sup>13</sup>C NMR (100 MHz, CDCl<sub>3</sub>) δ 142.3, 137.0, 129.2, 127.7, 124.9, 124.7, 83.0, 30.1, 24.7, 20.2.

<sup>11</sup>B NMR (128 MHz, CDCl<sub>3</sub>) δ 34.35.

**2,2'-(2-(4-chlorophenyl)ethane-1,1-diyl)bis(4,4,5,5-tetramethyl-1,3,2-dioxaborolane) (2d)<sup>11</sup>**

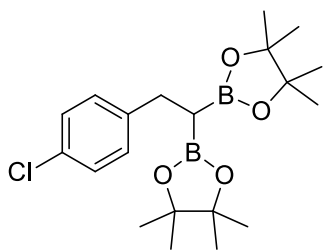

Following general procedure B; white solid; 77% yield.

$R_f$  (EtOAc/Hexane, 1:9) = 0.50.

$^1\text{H}$  NMR (400 MHz,  $\text{CDCl}_3$ )  $\delta$  7.20 – 7.14 (m, 4H), 2.83 (d,  $J$  = 8.4 Hz, 2H), 1.18 (br s, 12H), 1.17 (br s, 13H).

$^{13}\text{C}$  NMR (100 MHz,  $\text{CDCl}_3$ )  $\delta$  143.1, 131.1, 129.9, 128.1, 83.3, 30.8, 24.9, 24.7.

$^{11}\text{B}$  NMR (128 MHz,  $\text{CDCl}_3$ )  $\delta$  33.68.

Melting point: 63 – 65 °C.

**2,2'-(2-(2,4-difluorophenyl)ethane-1,1-diyl)bis(4,4,5,5-tetramethyl-1,3,2-dioxaborolane) (2e)**

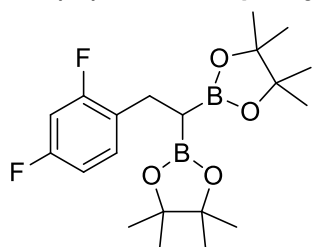

Following general procedure B; White solid; 75% yield.

$R_f$  (EtOAc/Hexane, 1:9) = 0.55.

$^1\text{H}$  NMR (400 MHz,  $\text{CDCl}_3$ )  $\delta$  7.25 – 7.18 (m, 1H), 6.75 – 6.67 (m, 2H), 2.84 (d,  $J$  = 8.3 Hz, 2H), 1.62 (s, 1H), 1.18 (br s, 9H), 1.17 (br s, 15H).

$^{13}\text{C}$  NMR (100 MHz,  $\text{CDCl}_3$ )  $\delta$  162.6, 162.4, 160.0, 131.1, 127.2, 110.5, 110.3, 103.4, 83.3, 25.0, 24.6, 24.2.

$^{11}\text{B}$  NMR (128 MHz,  $\text{CDCl}_3$ )  $\delta$  33.66.

$^{19}\text{F}$  NMR (376 MHz,  $\text{CDCl}_3$ )  $\delta$  -113.63, -114.83.

HRMS-ESI:  $m/z$   $[\text{M}+\text{Na}]^+$  for  $\text{C}_{20}\text{H}_{30}\text{B}_2\text{F}_2\text{O}_4\text{Na}$ , calculated 417.2191; observed 417.2195.

Melting point: 72 – 73 °C.

**2,2'-(pentane-1,1-diyl)bis(4,4,5,5-tetramethyl-1,3,2-dioxaborolane) (2f)**

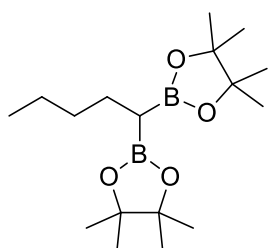

Following general procedure B; White solid; 88% yield.

$R_f$  (EtOAc/Hexane, 1:9) = 0.68.

$^1\text{H}$  NMR (400 MHz,  $\text{CDCl}_3$ )  $\delta$  1.52 (q,  $J$  = 7.5 Hz, 2H), 1.25 – 1.22 (m, 4H), 1.20 (s, 12H), 1.20 (s, 12H), 0.84 (t,  $J$  = 6.8 Hz, 3H), 0.68 (t,  $J$  = 7.9 Hz, 1H).

$^{13}\text{C}$  NMR (100 MHz,  $\text{CDCl}_3$ )  $\delta$  83.0, 35.0, 25.5, 25.0, 24.6, 22.8, 14.2.

$^{11}\text{B}$  NMR (128 MHz,  $\text{CDCl}_3$ )  $\delta$  34.04.

HRMS-ESI:  $m/z$   $[\text{M}+\text{Na}]^+$  for  $\text{C}_{17}\text{H}_{34}\text{B}_2\text{O}_4\text{Na}$ , calculated 347.2536; observed 347.2536.

Melting point: 57 – 58 °C.

**2,2'-(2-cyclopentylethane-1,1-diyl)bis(4,4,5,5-tetramethyl-1,3,2-dioxaborolane) (2g)**

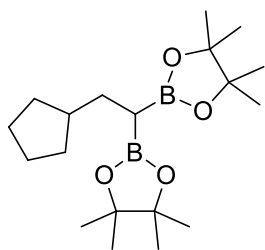

Following general procedure A; White solid; 79% yield.

$R_f$  (EtOAc/Hexane, 1:9) = 0.68.

$^1\text{H}$  NMR (400 MHz,  $\text{CDCl}_3$ )  $\delta$  1.72 – 1.65 (m, 3H), 1.58 – 1.50 (m, 4H), 1.47 – 1.40 (m, 2H), 1.20 (s, 24H), 1.07 – 0.99 (m, 2H), 0.7 – 0.94 (m, 1H).

$^{13}\text{C}$  NMR (100 MHz,  $\text{CDCl}_3$ )  $\delta$  82.9, 42.7, 32.5, 31.7, 25.2, 24.8, 24.6.

$^{11}\text{B}$  NMR (128 MHz,  $\text{CDCl}_3$ )  $\delta$  33.86.

HRMS-ESI:  $m/z$   $[\text{M}+\text{Na}]^+$  for  $\text{C}_{19}\text{H}_{36}\text{B}_2\text{O}_4\text{Na}$ , calculated 373.2692;

observed 373.2694.

Melting point: 43 – 44 °C.

**2,2'-(2-cyclohexylethane-1,1-diyl)bis(4,4,5,5-tetramethyl-1,3,2-dioxaborolane) (2h)<sup>12</sup>**

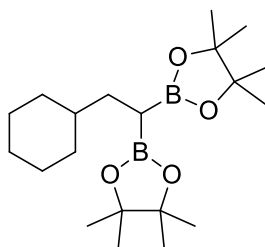

Following general procedure A; Colorless oil; 74% yield.

$R_f$  (EtOAc/Hexane, 1:9) = 0.68.

$^1\text{H}$  NMR (400 MHz,  $\text{CDCl}_3$ )  $\delta$  1.73 – 1.57 (m, 5H), 1.46 – 1.41 (m, 2H), 1.21 (m, 24H), 1.15 – 1.09 (m, 4H), 0.84 – 0.75 (m, 3H).

$^{13}\text{C}$  NMR (100 MHz,  $\text{CDCl}_3$ )  $\delta$  82.9, 39.9, 33.2, 33.0, 26.9, 26.6, 24.9, 24.7.

$^{11}\text{B}$  NMR (128 MHz,  $\text{CDCl}_3$ )  $\delta$  33.67.

**2,2'-(2-cyclopropylethane-1,1-diyl)bis(4,4,5,5-tetramethyl-1,3,2-dioxaborolane) (2i)**

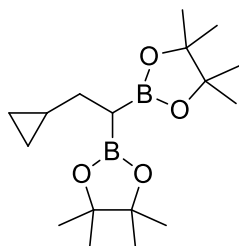

Following general procedure B; White solid; 83% yield.

$R_f$  (EtOAc/Hexane, 1:9) = 0.68.

$^1\text{H}$  NMR (400 MHz,  $\text{CDCl}_3$ )  $\delta$  1.43 (t,  $J$  = 7.3 Hz, 2H), 1.20 (br s, 24H), 0.85 (t,  $J$  = 7.5 Hz, 1H), 0.70 – 0.62 (m, 1H), 0.34 – 0.29 (m, 2H), 0.02 (d,  $J$  = 4.5 Hz, 2H).

$^{13}\text{C}$  NMR (100 MHz,  $\text{CDCl}_3$ )  $\delta$  83.0, 31.0, 24.9, 24.7, 13.6, 4.9.

$^{11}\text{B}$  NMR (128 MHz,  $\text{CDCl}_3$ )  $\delta$  33.85.

HRMS-ESI:  $m/z$   $[\text{M}+\text{H}]^+$  for  $\text{C}_{17}\text{H}_{33}\text{B}_2\text{O}_4$ , calculated 323.2560; observed 323.2565.

Melting point: 32 – 34 °C.

**2,2'-(2-(thiophen-3-yl)ethane-1,1-diyl)bis(4,4,5,5-tetramethyl-1,3,2-dioxaborolane) (2j)**<sup>12</sup>

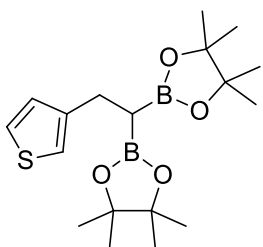

Following general procedure B; Yellow liquid; 78% yield.

$R_f$  (EtOAc/Hexane, 1:9) = 0.4.

$^1\text{H}$  NMR (400 MHz,  $\text{CDCl}_3$ )  $\delta$  7.18 – 7.14 (m, 1H), 6.97 – 6.93 (m, 2H), 2.88 (d,  $J$  = 8.3 Hz, 2H), 1.62 (s, 1H), 1.19 (s, 12H), 1.17 (s, 12H).

$^{13}\text{C}$  NMR (100 MHz,  $\text{CDCl}_3$ )  $\delta$  145.2, 128.6, 124.8, 119.8, 83.3, 26.1, 24.9, 24.7.

$^{11}\text{B}$  NMR (128 MHz,  $\text{CDCl}_3$ )  $\delta$  33.85.

**2,2'-(3-methoxypropane-1,1-diyl)bis(4,4,5,5-tetramethyl-1,3,2-dioxaborolane) (2k)**<sup>7</sup>

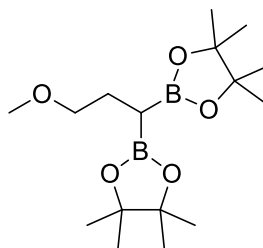

Following general procedure B; Colorless oil; 77% yield.

$R_f$  (EtOAc/Hexane, 1:9) = 0.60.

$^1\text{H}$  NMR (400 MHz,  $\text{CDCl}_3$ )  $\delta$  3.33 – 3.26 (m, 5H), 1.79 (q,  $J$  = 6.8 Hz, 2H), 1.20 (br s, 24H), 0.70 (t,  $J$  = 7.4 Hz, 1H).

$^{13}\text{C}$  NMR (100 MHz,  $\text{CDCl}_3$ )  $\delta$  83.1, 74.7, 58.4, 25.7, 24.9, 24.6.

$^{11}\text{B}$  NMR (128 MHz,  $\text{CDCl}_3$ )  $\delta$  33.67.

**2,2'-(octane-1,1-diyl)bis(4,4,5,5-tetramethyl-1,3,2-dioxaborolane) (2l)**

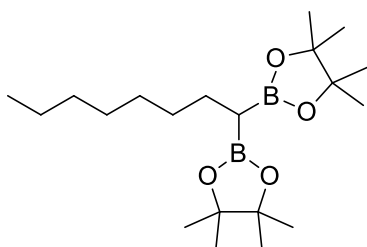

Following general procedure B; Colorless oil; 88% yield.

$R_f$  (EtOAc/Hexane, 1:9) = 0.68.

$^1\text{H}$  NMR (400 MHz,  $\text{CDCl}_3$ )  $\delta$  1.51 (s, 2H), 1.24 (br s, 10H), 1.22 (s, 12H), 1.21 (s, 12H), 0.85 (t,  $J$  = 6.6 Hz, 3H), 0.70 (t,  $J$  = 7.7 Hz, 1H).

$^{13}\text{C}$  NMR (100 MHz,  $\text{CDCl}_3$ )  $\delta$  83.0, 32.7, 32.0, 29.7, 29.4, 25.8, 25.0, 24.7, 22.8, 14.3.

$^{11}\text{B}$  NMR (128 MHz,  $\text{CDCl}_3$ )  $\delta$  34.03.

HRMS-ESI:  $m/z$   $[\text{M}+\text{Na}]^+$  for  $\text{C}_{20}\text{H}_{40}\text{B}_2\text{O}_4\text{Na}$ , calculated 389.3005; observed 389.3010.

**2,2'-(3-cyclohexylpropane-1,1-diyl)bis(4,4,5,5-tetramethyl-1,3,2-dioxaborolane) (2m)**<sup>7</sup>

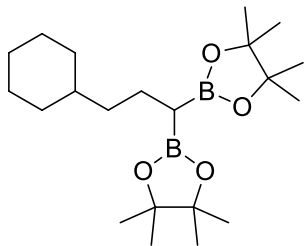

Following general procedure A; White solid; 43% yield.

$R_f$  (EtOAc/Hexane, 1:9) = 0.68.

$^1\text{H}$  NMR (400 MHz,  $\text{CDCl}_3$ )  $\delta$  1.72 – 1.51 (m, 8H), 1.22 (s, 12H), 1.21 (s, 12H), 1.18 – 1.13 (m, 5H), 0.89 – 0.80 (m, 2H), 0.66 (t,  $J$  = 7.6 Hz, 1H).

$^{13}\text{C}$  NMR (100 MHz,  $\text{CDCl}_3$ )  $\delta$  83.0, 40.7, 37.9, 33.6, 26.9, 26.5, 25.0, 24.7, 23.2.

$^{11}\text{B}$  NMR (128 MHz,  $\text{CDCl}_3$ )  $\delta$  33.95.

Melting point: 54 – 55 °C.

### 2,2'-(6-chlorohexane-1,1-diyl)bis(4,4,5,5-tetramethyl-1,3,2-dioxaborolane) 2n

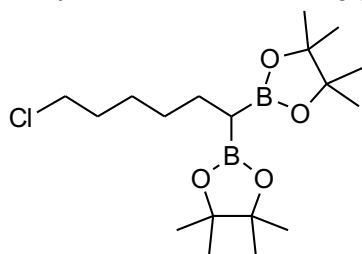

Following general procedure A; colorless oil; 87% yield.

$R_f$  (EtOAc/Hexane, 1:9) = 0.62.

$^1\text{H}$  NMR (400 MHz,  $\text{CDCl}_3$ )  $\delta$  3.51 (t,  $J$  = 6.9 Hz, 2H), 1.79 – 1.71 (m, 2H), 1.58 – 1.51 (m, 2H), 1.45 – 1.36 (m, 2H), 1.34 – 1.28 (m, 2H), 1.22 (d,  $J$  = 3.7 Hz, 24H), 0.70 (t,  $J$  = 7.8 Hz, 1H).

$^{13}\text{C}$  NMR (100 MHz,  $\text{CDCl}_3$ )  $\delta$  82.6, 44.7, 32.2, 31.3, 26.6, 25.2, 24.7, 24.3.

$^{11}\text{B}$  NMR (128 MHz,  $\text{CDCl}_3$ )  $\delta$  33.67.

HRMS-ESI:  $m/z$   $[\text{M}+\text{H}]^+$  for  $\text{C}_{18}\text{H}_{36}\text{B}_2\text{ClO}_4$ , calculated 373.2483; observed 373.2485.

### Methyl 6,6-bis(4,4,5,5-tetramethyl-1,3,2-dioxaborolan-2-yl)hexanoate 2o

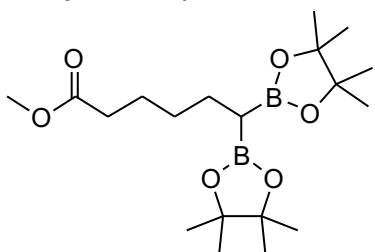

Following general procedure A; colorless oil; 53% yield.

$R_f$  (EtOAc/Hexane, 1:9) = 0.58.

$^1\text{H}$  NMR (400 MHz,  $\text{CDCl}_3$ )  $\delta$  3.61 (s, 3H), 2.26 (t,  $J$  = 7.6 Hz, 2H), 1.63 – 1.48 (m, 4H), 1.33 – 1.24 (m, 2H), 1.19 (d,  $J$  = 4.0 Hz, 24H), 0.67 (t,  $J$  = 7.8 Hz, 1H).

$^{13}\text{C}$  NMR (100 MHz,  $\text{CDCl}_3$ )  $\delta$  174.4, 83.0, 51.4, 34.2, 32.1, 25.3, 25.1, 24.9, 24.6.

$^{11}\text{B}$  NMR (128 MHz,  $\text{CDCl}_3$ )  $\delta$  33.66.

HRMS-ESI:  $m/z$   $[\text{M}+\text{H}]^+$  for  $\text{C}_{19}\text{H}_{37}\text{B}_2\text{O}_6$ , calculated 383.2771; observed 383.2779.

### 2,2'-(hept-6-yne-1,1-diyl)bis(4,4,5,5-tetramethyl-1,3,2-dioxaborolane) (2p)

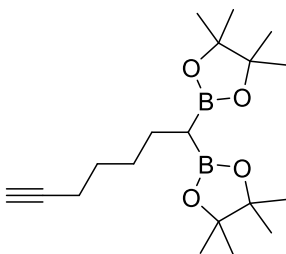

Following general procedure C; Colorless oil; 63% yield.

$R_f$  (EtOAc/Hexane, 2:8) = 0.6.

$^1\text{H}$  NMR (400 MHz,  $\text{CDCl}_3$ )  $\delta$  2.15 – 2.10 (m, 2H), 1.86 (t,  $J$  = 2.5 Hz, 1H), 1.57 – 1.44 (m, 4H), 1.40 – 1.32 (m, 2H), 1.20 (s, 12H), 1.19 (s, 12H), 0.68 (t,  $J$  = 7.6 Hz, 1H).

$^{13}\text{C}$  NMR (100 MHz,  $\text{CDCl}_3$ )  $\delta$  84.9, 83.0, 68.0, 31.7, 28.6, 25.2, 24.6, 18.4.

$^{11}\text{B}$  NMR (128 MHz,  $\text{CDCl}_3$ )  $\delta$  34.05.

HRMS-ESI:  $m/z$   $[\text{M}+\text{Na}]^+$  for  $\text{C}_{19}\text{H}_{34}\text{B}_2\text{O}_4\text{Na}$ , calculated 371.2536; observed 371.2543.

**2,2'-(but-3-ene-1,1-diyl)bis(4,4,5,5-tetramethyl-1,3,2-dioxaborolane) (2q)<sup>8</sup>**

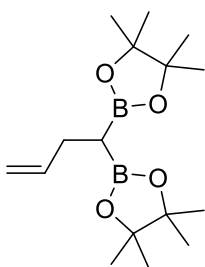

Following general procedure C; Colorless oil; 65% yield.

$R_f$ (EtOAc/Hexane, 2:8) = 0.6.

$^1\text{H}$  NMR (400 MHz,  $\text{CDCl}_3$ )  $\delta$  5.90 – 5.78 (m, 1H), 4.96 (d,  $J$  = 17.1 Hz, 1H), 4.83 (d,  $J$  = 10.0 Hz, 1H), 2.29 – 2.23 (m, 2H), 1.20 (s, 12H), 1.19 (s, 12H), 0.81 (t,  $J$  = 7.7 Hz, 1H).

$^{13}\text{C}$  NMR (100 MHz,  $\text{CDCl}_3$ )  $\delta$  140.8, 113.2, 83.1, 29.7, 24.9, 24.6.

$^{11}\text{B}$  NMR (128 MHz,  $\text{CDCl}_3$ )  $\delta$  33.88.

**2,2',2''-(2-phenylethane-1,1,2-triyl)tris(4,4,5,5-tetramethyl-1,3,2-dioxaborolane) 2t<sup>9</sup>**

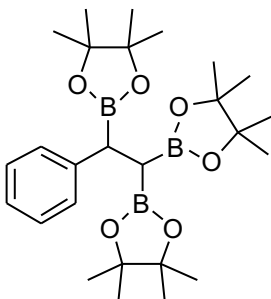

sticky liquid; 70% yield.

$R_f$ (EtOAc/Hexane, 1:9) = 0.41.

$^1\text{H}$  NMR (400 MHz,  $\text{CDCl}_3$ )  $\delta$  7.23 – 7.12 (m, 4H), 7.05 – 6.99 (m, 1H), 2.66 (d,  $J$  = 12.7 Hz, 1H), 1.44 (d,  $J$  = 12.8 Hz, 1H), 1.23 (d,  $J$  = 4.7 Hz, 12H), 1.13 (d,  $J$  = 8.3 Hz, 12H), 0.93 (d,  $J$  = 7.8 Hz, 12H).

$^{13}\text{C}$  NMR (100 MHz,  $\text{CDCl}_3$ )  $\delta$  145.3, 128.5, 127.8, 124.6, 24.9, 24.9, 24.7, 24.4, 24.4, 24.3.

$^{11}\text{B}$  NMR (128 MHz,  $\text{CDCl}_3$ )  $\delta$  33.46.

**Table S1.** Optimization of reaction conditions for synthesis of unsymmetrical geminal boronate (**3**)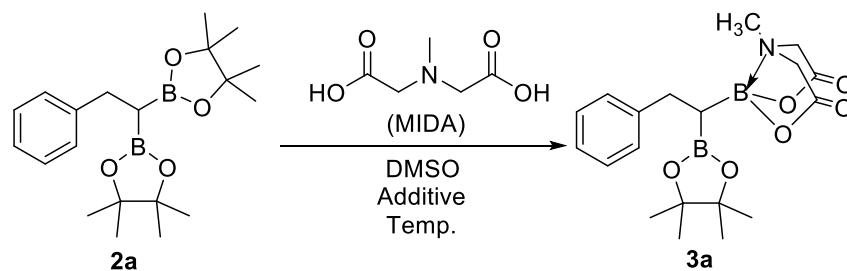

| Entry | MIDA (equiv) | Additive                       | Time (h) | Temp. (°C) | Yield (%) <sup>a</sup> |
|-------|--------------|--------------------------------|----------|------------|------------------------|
| 1     | 1            | -                              | 15       | 130        | <5                     |
| 2     | 1            | -                              | 15       | 155        | <5                     |
| 3     | 1            | -                              | 15       | 160        | <5                     |
| 4     | 6            | -                              | 15       | 130        | 26                     |
| 5     | 6            | -                              | 36       | 130        | 28                     |
| 6     | 6            | HC(OEt) <sub>3</sub> (4 equiv) | 15       | 130        | 38                     |
| 7     | 6            | HC(OEt) <sub>3</sub> (4 equiv) | 36       | 130        | 40                     |

<sup>a</sup> Isolated yield.

## 2. Synthesis of unsymmetrical geminal diboryl compounds

### 2.1 General procedure for the synthesis of unsymmetrical geminal diboryl compounds **3**

**2** (2 mmol) and methyliminodiacetic acid (MIDA, 6 equiv) were placed in a thick wall high-pressure reaction tube equipped with a stir bar. DMSO (3 mL) and HC(OEt)<sub>3</sub> (4 equiv)<sup>13</sup> were added to the tube and purged with nitrogen, the resulting mixture was stirred at 130 °C for 16 h. The reaction mixture was then cooled to room temperature and diluted with 15 mL H<sub>2</sub>O. The mixture was extracted with EtOAc (3 x 200 mL). The combined organic phases were washed with brine, and then dried over Na<sub>2</sub>SO<sub>4</sub>, filtered, and concentrated. The resulting residue was purified by flash column chromatography (silica gel; EtOAc/hexanes, 0:10 to 10:0) to obtain **3**. The unreacted symmetrical diborylalkanes (**2**) were recovered and used again.

### 2.2 Synthesis of **3n** and **3o**

To a solution of **2n** or **2o** (2 mmol) in a 2:1 mixture (12 mL) of acetone and water, ammonium acetate (3.1 eq.) and sodium periodate (3.1 eq.) were added. The resulting suspension was stirred at 80 °C (reflux) for 2 h. The mixture was then cooled down to room temperature and treated with 5 mL of saturated thiosulfate solution and 5 mL of water. The mixture was extracted with EtOAc (3 x 150 mL). The combined organic extracts were washed with brine, dried with Na<sub>2</sub>SO<sub>4</sub>, filtered and concentrated to afford the corresponding boronic acids.<sup>14</sup>

The crude residue and methyliminodiacetic acid (MIDA, 6 equiv) were placed in a thick wall high-

pressure reaction tube equipped with a stir bar. DMSO (3 mL) and HC(OEt)<sub>3</sub> (4 equiv)<sup>13</sup> were added to the tube and purged with nitrogen, the resulting mixture was stirred at 115 °C for 16 h. The reaction mixture was then cooled to room temperature and diluted with 15 mL H<sub>2</sub>O. The mixture was extracted with EtOAc (3 x 200 mL). The combined organic phases were washed with brine, and then dried over Na<sub>2</sub>SO<sub>4</sub>, filtered, and concentrated. The resulting residue was purified by flash column chromatography (silica gel; EtOAc/hexanes, 0:10 to 10:0) to obtain **3n** or **3o**.

**6-methyl-2-(2-phenyl-1-(4,4,5,5-tetramethyl-1,3,2-dioxaborolan-2-yl)ethyl)-1,3,6,2-dioxazaborocane-4,8-dione (3a)**

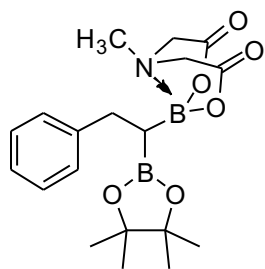

Sticky solid; 38% yield.

R<sub>f</sub> (EtOAc) = 0.33.

<sup>1</sup>H NMR (400 MHz, CDCl<sub>3</sub>) δ 7.28 – 7.20 (m, 4H), 7.15 – 7.10 (m, 1H), 3.85 – 3.79 (m, 3H), 3.72 – 3.66 (m, 1H), 2.98 (s, 3H), 2.92 – 2.88 (m, 2H), 1.10 (d, *J* = 3.4 Hz, 12H), 0.89 – 0.83 (m, 1H).

<sup>13</sup>C NMR (100 MHz, CDCl<sub>3</sub>) δ 167.3, 166.9, 144.6, 128.8, 128.2, 125.6, 83.5, 63.1, 62.6, 46.2, 32.0, 25.1, 24.9.

<sup>11</sup>B NMR (128 MHz, CDCl<sub>3</sub>) δ 13.27, 34.80.

HRMS-ESI: *m/z* [M+Na]<sup>+</sup> for C<sub>19</sub>H<sub>27</sub>B<sub>2</sub>NO<sub>6</sub>Na, calculated 410.1923; observed 410.1917.

**6-methyl-2-(1-(4,4,5,5-tetramethyl-1,3,2-dioxaborolan-2-yl)-2-(p-tolyl)ethyl)-1,3,6,2-dioxazaborocane-4,8-dione (3b)**

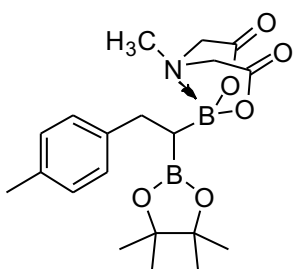

White solid; 31% yield.

R<sub>f</sub> (EtOAc) = 0.33.

<sup>1</sup>H NMR (400 MHz, CDCl<sub>3</sub>) δ 7.15 (d, *J* = 7.9 Hz, 2H), 7.03 (d, *J* = 7.5 Hz, 2H), 3.82 – 3.73 (m, 3H), 3.68 – 3.64 (m, 1H), 2.96 (s, 3H), 2.86 (d, *J* = 7.7 Hz, 2H), 2.28 (s, 3H), 1.12 (s, 12H), 0.82 (t, *J* = 7.5 Hz, 1H).

<sup>13</sup>C NMR (100 MHz, CDCl<sub>3</sub>) δ 167.3, 166.9, 141.5, 135.0, 128.8, 128.6, 83.4, 63.1, 62.7, 46.3, 31.6, 25.1, 24.9, 21.1.

<sup>11</sup>B NMR (128 MHz, CDCl<sub>3</sub>) δ 13.06, 34.78.

HRMS-ESI: *m/z* [M+Na]<sup>+</sup> for C<sub>20</sub>H<sub>29</sub>B<sub>2</sub>NO<sub>6</sub>Na, calculated 424.2072; observed 424.2074.

Melting point: 207 – 210 °C.



**6-methyl-2-(1-(4,4,5,5-tetramethyl-1,3,2-dioxaborolan-2-yl)-2-(*o*-tolyl)ethyl)-1,3,6,2-dioxazaborocane-4,8-dione (3c)**

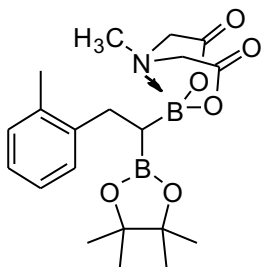

Sticky liquid; 30% yield.

$R_f$  (EtOAc) = 0.33.

$^1\text{H NMR}$  (400 MHz,  $\text{CDCl}_3$ )  $\delta$  7.37 – 7.22 (m, 1H), 7.07 (q,  $J$  = 8.1, 7.4 Hz, 3H), 3.91 – 3.68 (m, 4H), 3.03 (s, 3H), 2.94 – 2.81 (m, 2H), 2.33 (s, 3H), 1.11 (d,  $J$  = 5.1 Hz, 12H), 0.90 – 0.77 (m, 1H).

$^{13}\text{C NMR}$  (101 MHz,  $\text{CDCl}_3$ )  $\delta$  167.2, 166.8, 142.7, 136.3, 130.1, 128.8, 125.7, 125.6, 83.5, 63.1, 62.6, 46.3, 29.0, 25.2, 24.9, 19.7.

$^{11}\text{B NMR}$  (128 MHz,  $\text{CDCl}_3$ )  $\delta$  13.61, 34.92.

HRMS-ESI:  $m/z$   $[\text{M}+\text{Na}]^+$  for  $\text{C}_{20}\text{H}_{29}\text{B}_2\text{NO}_6\text{Na}$ , calculated 424.2073; observed 424.2080.

**2-(2-(4-chlorophenyl)-1-(4,4,5,5-tetramethyl-1,3,2-dioxaborolan-2-yl)ethyl)-6-methyl-1,3,6,2-dioxazaborocane-4,8-dione (3d)**

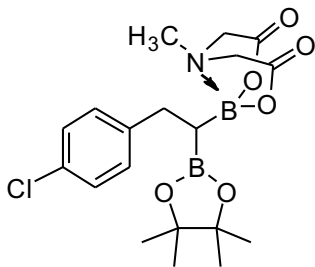

White solid; 60% yield.

$R_f$  (EtOAc) = 0.33.

$^1\text{H NMR}$  (400 MHz,  $\text{CD}_3\text{CN}$ )  $\delta$  7.24 (s, 4H), 4.30 – 3.63 (m, 4H), 3.00 (s, 3H), 2.88 – 2.53 (m, 2H), 1.06 (d,  $J$  = 4.7 Hz, 12H), 0.88 – 0.76 (m, 1H).

$^{13}\text{C NMR}$  (100 MHz,  $\text{CDCl}_3$ )  $\delta$  167.0, 166.6, 143.3, 131.2, 130.2, 128.1, 83.6, 63.2, 62.6, 46.3, 31.5, 25.2, 24.9.

$^{11}\text{B NMR}$  (128 MHz,  $\text{CDCl}_3$ )  $\delta$  13.24, 34.98.

HRMS-ESI:  $m/z$   $[\text{M}+\text{Na}]^+$  for  $\text{C}_{19}\text{H}_{26}\text{B}_2\text{ClNO}_6\text{Na}$ , calculated 444.1531; observed 444.1527.

Melting point: 223 – 224 °C.

**2-(2-(2,4-difluorophenyl)-1-(4,4,5,5-tetramethyl-1,3,2-dioxaborolan-2-yl)ethyl)-6-methyl-1,3,6,2-dioxazaborocane-4,8-dione (3e)**

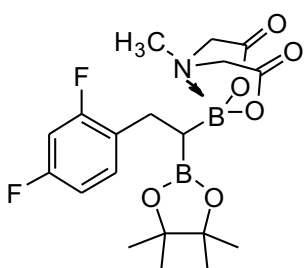

Sticky solid; 42% yield.

$R_f$  (EtOAc) = 0.33.

$^1\text{H NMR}$  (400 MHz,  $\text{CDCl}_3$ )  $\delta$  7.32 – 7.27 (m, 1H), 6.77 – 6.67 (m, 2H), 3.93 – 3.75 (m, 4H), 3.07 (s, 3H), 2.85 – 2.82 (m, 2H), 1.11 (s, 12H), 0.86 (m, 1H).

$^{13}\text{C NMR}$  (100 MHz,  $\text{CDCl}_3$ )  $\delta$  167.1, 166.7, 162.5 (dd,  $J_{\text{C-F}}$  = 10.8, 22.2 Hz), 160.0 (dd,  $J_{\text{C-F}}$  = 10.7, 23.0 Hz), 131.9, 131.8, 131.8, 127.0 (d,  $J$  = 11.8 Hz), 110.5 (dd,  $J$  = 20.5, 3.7 Hz), 103.4 (t,  $J$  = 25.9 Hz), 83.6, 63.1, 62.7, 46.3, 31.1, 25.3, 25.0, 24.9.

$^{11}\text{B NMR}$  (128 MHz,  $\text{CDCl}_3$ )  $\delta$  13.07, 34.79.

$^{19}\text{F NMR}$  (376 MHz,  $\text{CDCl}_3$ )  $\delta$  -114.01, -114.43.

HRMS-ESI:  $m/z$   $[\text{M}+\text{H}]^+$  for  $\text{C}_{19}\text{H}_{26}\text{B}_2\text{F}_2\text{NO}_6$ , calculated 424.1909; observed 424.1914.

**6-methyl-2-(1-(4,4,5,5-tetramethyl-1,3,2-dioxaborolan-2-yl)pentyl)-1,3,6,2-dioxazaborocane-4,8-dione (3f)**

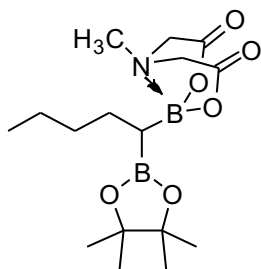

White solid; 40% yield.

$R_f$  (EtOAc) = 0.29.

$^1\text{H NMR}$  (400 MHz,  $\text{CDCl}_3$ )  $\delta$  3.94 – 3.74 (m, 4H), 3.01 (s, 3H), 1.67 – 1.54 (m, 1H), 1.52 – 1.44 (m, 1H), 1.43 – 1.36 (m, 1H), 1.33 – 1.25 (m, 3H), 1.22 (s, 12H), 0.87 (t,  $J$  = 6.5 Hz, 3H), 0.42 (m, 1H).

$^{13}\text{C NMR}$  (100 MHz,  $\text{CDCl}_3$ )  $\delta$  167.8, 167.5, 83.2, 63.1, 62.8, 46.3, 34.5, 26.2, 25.1, 25.0, 23.1, 14.2.

$^{11}\text{B NMR}$  (128 MHz,  $\text{CDCl}_3$ )  $\delta$  13.59, 34.90.

HRMS-ESI:  $m/z$   $[\text{M}+\text{Na}]^+$  for  $\text{C}_{16}\text{H}_{29}\text{B}_2\text{NO}_6\text{Na}$ , calculated 376.2074; observed 376.2077.

Melting point: 48 – 50 °C.

**2-(2-cyclopentyl-1-(4,4,5,5-tetramethyl-1,3,2-dioxaborolan-2-yl)ethyl)-6-methyl-1,3,6,2-dioxazaborocane-4,8-dione (3g)**

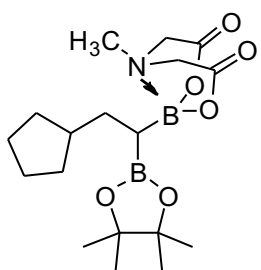

White solid; 38% yield.

$R_f$  (EtOAc) = 0.29.

$^1\text{H NMR}$  (400 MHz,  $\text{CDCl}_3$ )  $\delta$  3.91 – 3.74 (m, 4H), 3.01 (s, 3H), 1.89 – 1.80 (m, 1H), 1.77 – 1.68 (m, 3H), 1.60 – 1.55 (m, 2H), 1.51 – 1.45 (m, 2H), 1.38 – 1.31 (m, 1H), 1.22 (s, 12H), 1.10 – 1.00 (m, 2H), 1.12 – 0.98 (m, 1H).

$^{13}\text{C NMR}$  (100 MHz,  $\text{CDCl}_3$ )  $\delta$  167.7, 167.5, 83.2, 63.0, 62.7, 46.3, 42.2, 33.4, 32.6, 32.2, 25.3, 25.0.

$^{11}\text{B NMR}$  (128 MHz,  $\text{CDCl}_3$ )  $\delta$  13.77, 35.48.

HRMS-ESI:  $m/z$   $[\text{M}+\text{H}]^+$  for  $\text{C}_{18}\text{H}_{32}\text{B}_2\text{NO}_6$ , calculated 380.2411; observed 380.2422.

Melting point: 245 – 248 °C.

**2-(2-cyclohexyl-1-(4,4,5,5-tetramethyl-1,3,2-dioxaborolan-2-yl)ethyl)-6-methyl-1,3,6,2-dioxazaborocane-4,8-dione (3h)**

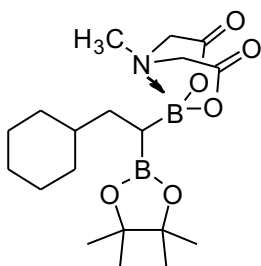

White solid; 43% yield.

$R_f$  (EtOAc) = 0.29.

$^1\text{H NMR}$  (400 MHz,  $\text{CDCl}_3$ )  $\delta$  3.89 – 3.74 (m, 4H), 3.01 (s, 3H), 1.82 – 1.53 (m, 8H), 1.22 (s, 12H), 1.16 – 1.07 (m, 3H), 0.91 – 0.81 (m, 1H), 0.80 – 0.69 (m, 1H), 0.56 (d,  $J$  = 9.8 Hz, 1H).

$^{13}\text{C NMR}$  (100 MHz,  $\text{CDCl}_3$ )  $\delta$  167.6, 167.4, 83.2, 63.0, 62.7, 46.2, 39.5, 34.4, 33.9, 32.5, 26.9, 26.6, 26.5, 25.0.

$^{11}\text{B NMR}$  (128 MHz,  $\text{CDCl}_3$ )  $\delta$  13.62, 35.48.

HRMS-ESI:  $m/z$   $[\text{M}+\text{Na}]^+$  for  $\text{C}_{19}\text{H}_{33}\text{B}_2\text{NO}_6\text{Na}$ , calculated 416.2386; observed 416.2389.

Melting point: 242 – 244 °C.

**2-(2-cyclopropyl-1-(4,4,5,5-tetramethyl-1,3,2-dioxaborolan-2-yl)ethyl)-6-methyl-1,3,6,2-dioxazaborocane-4,8-dione (3i)**

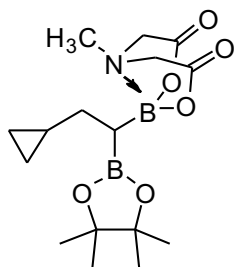

Sticky solid; 83% yield.

$R_f$  (EtOAc) = 0.5.

$^1\text{H}$  NMR (400 MHz,  $\text{CDCl}_3$ )  $\delta$  3.96 – 3.73 (m, 4H), 3.02 (s, 3H), 1.71 – 1.61 (m, 2H), 1.23 (s, 12H), 0.88 – 0.81 (m, 1H), 0.62 – 0.55 (m, 1H), 0.43 – 0.32 (m, 2H), 0.14 – 0.07 (m, 1H), 0.02 – -0.05 (m, 1H).

$^{13}\text{C}$  NMR (100 MHz,  $\text{CDCl}_3$ )  $\delta$  167.6, 167.3, 83.3, 63.2, 62.8, 46.4, 31.7, 25.2, 25.0, 13.4, 5.7, 4.7.

$^{11}\text{B}$  NMR (128 MHz,  $\text{CDCl}_3$ )  $\delta$  13.83, 35.48.

HRMS-ESI:  $m/z$   $[\text{M}+\text{H}]^+$  for  $\text{C}_{16}\text{H}_{28}\text{B}_2\text{NO}_6$ , calculated 352.2098; observed 352.2099.

**6-methyl-2-(1-(4,4,5,5-tetramethyl-1,3,2-dioxaborolan-2-yl)-2-(thiophen-3-yl)ethyl)-1,3,6,2-dioxazaborocane-4,8-dione (3j)**

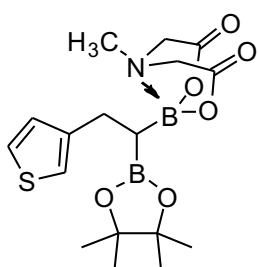

Pale yellowish solid; 35% yield.

$R_f$  (EtOAc) = 0.45.

$^1\text{H}$  NMR (400 MHz,  $\text{CDCl}_3$ )  $\delta$  7.19 – 7.16 (m, 1H), 7.02 – 6.97 (m, 2H), 3.88 – 3.75 (m, 3H), 3.69 (d,  $J$  = 16.7 Hz, 1H), 2.97 (s, 3H), 2.93 – 2.86 (m, 2H), 1.14 (s, 12H), 0.84 (dd,  $J$  = 10.2, 4.6 Hz, 1H).

$^{13}\text{C}$  NMR (100 MHz,  $\text{CDCl}_3$ )  $\delta$  167.2, 166.8, 145.1, 128.9, 124.9, 120.4, 83.5, 63.1, 62.7, 46.2, 26.6, 25.1, 24.9.

$^{11}\text{B}$  NMR (128 MHz,  $\text{CDCl}_3$ )  $\delta$  13.44, 34.97.

HRMS-ESI:  $m/z$   $[\text{M}+\text{Na}]^+$  for  $\text{C}_{17}\text{H}_{25}\text{B}_2\text{NO}_6\text{SNa}$ , calculated 416.1481; observed 416.1483.

Melting point: 210 – 213 °C.

**2-(3-methoxy-1-(4,4,5,5-tetramethyl-1,3,2-dioxaborolan-2-yl)propyl)-6-methyl-1,3,6,2-dioxazaborocane-4,8-dione (3k)**

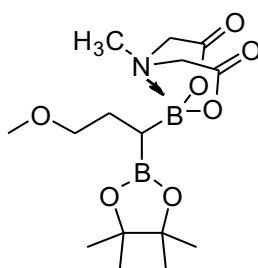

White solid; 72% yield.

$R_f$  (EtOAc) = 0.29.

$^1\text{H}$  NMR (400 MHz,  $\text{CDCl}_3$ )  $\delta$  3.94 (d,  $J$  = 16.5 Hz, 1H), 3.79 (d,  $J$  = 14.2 Hz, 3H), 3.48 – 3.38 (m, 2H), 3.30 (s, 3H), 3.03 (s, 3H), 1.86 – 1.78 (m, 2H), 1.21 (s, 12H), 0.55 – 0.49 (m, 1H).

$^{13}\text{C}$  NMR (100 MHz,  $\text{CDCl}_3$ )  $\delta$  167.7, 167.5, 83.4, 74.2, 63.3, 62.9, 58.4, 46.4, 26.3, 25.1, 24.9.

$^{11}\text{B}$  NMR (128 MHz,  $\text{CDCl}_3$ )  $\delta$  13.64, 35.86.

HRMS-ESI:  $m/z$   $[\text{M}+\text{Na}]^+$  for  $\text{C}_{15}\text{H}_{27}\text{B}_2\text{NO}_7\text{Na}$ , calculated 378.1866; observed 378.1873.

Melting point: 178 – 179 °C.

**6-methyl-2-(1-(4,4,5,5-tetramethyl-1,3,2-dioxaborolan-2-yl)octyl)-1,3,6,2-dioxazaborocane-4,8-dione (3l)**

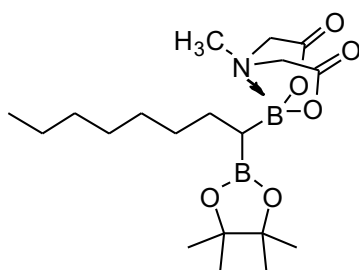

White solid; 51% yield.

$R_f$  (EtOAc) = 0.29.

$^1\text{H}$  NMR (400 MHz,  $\text{CDCl}_3$ )  $\delta$  3.91 (d,  $J$  = 16.1 Hz, 1H), 3.81 – 3.74 (m, 3H), 3.01 (s, 3H), 1.55 – 1.38 (m, 2H), 1.28 – 1.25 (m, 7H), 1.22 (s, 15H), 0.87 (t,  $J$  = 6.5 Hz, 3H), 0.42 (d,  $J$  = 11.9 Hz, 1H).

$^{13}\text{C}$  NMR (100 MHz,  $\text{CDCl}_3$ )  $\delta$  167.2, 167.0, 83.3, 63.2, 62.8, 46.2,

32.3, 32.0, 30.0, 29.4, 26.6, 25.1, 25.0, 22.8, 14.3.

$^{11}\text{B}$  NMR (128 MHz,  $\text{CDCl}_3$ )  $\delta$  13.62, 35.35.

HRMS-ESI:  $m/z$   $[\text{M}+\text{Na}]^+$  for  $\text{C}_{19}\text{H}_{35}\text{B}_2\text{NO}_6\text{Na}$ , calculated 418.2543; observed 418.2551.

Melting point: 185 – 186 °C.

**2-(3-cyclohexyl-1-(4,4,5,5-tetramethyl-1,3,2-dioxaborolan-2-yl)propyl)-6-methyl-1,3,6,2-dioxazaborocane-4,8-dione (3m)**

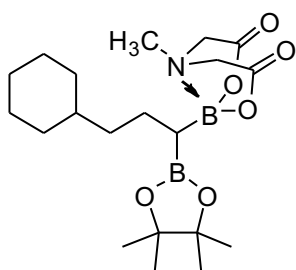

White solid; 66% yield.

$R_f$  (EtOAc) = 0.29.

$^1\text{H}$  NMR (400 MHz,  $\text{CDCl}_3$ )  $\delta$  3.94 – 3.88 (m, 1H), 3.82 – 3.67 (m, 3H), 3.00 (s, 3H), 1.73 – 1.58 (m, 7H), 1.31 (m, 1H), 1.23 (s, 12H), 1.20 – 1.13 (m, 5H), 0.92 – 0.82 (m, 2H), 0.39 (d,  $J$  = 9.2 Hz, 1H).

$^{13}\text{C}$  NMR (100 MHz,  $\text{CDCl}_3$ )  $\delta$  167.3, 167.1, 83.3, 63.2, 62.8, 46.3, 40.2, 38.2, 33.8, 33.3, 26.9, 26.6, 26.5, 25.1, 25.0, 23.9.

$^{11}\text{B}$  NMR (128 MHz,  $\text{CDCl}_3$ )  $\delta$  14.69, 35.34.

HRMS-ESI:  $m/z$   $[\text{M}+\text{Na}]^+$  for  $\text{C}_{20}\text{H}_{35}\text{B}_2\text{NO}_6\text{Na}$ , calculated 430.2544; observed 430.2556.

Melting point: 54 – 55 °C.

**2-(6-chloro-1-(4,4,5,5-tetramethyl-1,3,2-dioxaborolan-2-yl)hexyl)-6-methyl-1,3,6,2-dioxazaborocane-4,8-dione (3n)**

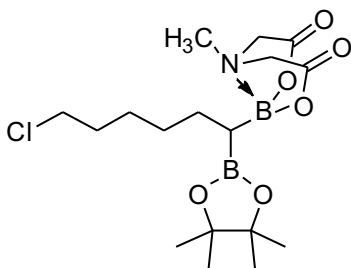

White solid; 31% yield.

$R_f$  (EtOAc) = 0.32.

$^1\text{H}$  NMR (400 MHz,  $\text{CD}_3\text{CN}$ )  $\delta$  3.95 – 3.74 (m, 4H), 3.58 (t,  $J$  = 6.7 Hz, 2H), 2.93 (s, 3H), 1.80 – 1.69 (m, 2H), 1.50 – 1.34 (m, 5H), 1.32 – 1.26 (m, 1H), 1.20 (s, 12H), 0.44 – 0.37 (m, 1H).

$^{13}\text{C}$  NMR (100 MHz,  $\text{CD}_3\text{CN}$ )  $\delta$  169.2, 169.0, 83.8, 63.5, 63.4, 47.0, 46.2, 33.2, 32.0, 27.7, 27.1, 25.2, 25.2.

$^{11}\text{B}$  NMR (128 MHz,  $\text{CD}_3\text{CN}$ )  $\delta$  13.22, 35.16.

HRMS-ESI:  $m/z$   $[\text{M}+\text{Na}]^+$  for  $\text{C}_{17}\text{H}_{30}\text{B}_2\text{ClNO}_6\text{Na}$ , calculated 424.1840; observed 424.1847.

Melting point: 194 – 198 °C.

**Methyl 6-(6-methyl-4,8-dioxo-1,3,6,2-dioxazaborocan-2-yl)-6-(4,4,5,5-tetramethyl-1,3,2-dioxaborolan-2-yl)hexanoate (3o)**

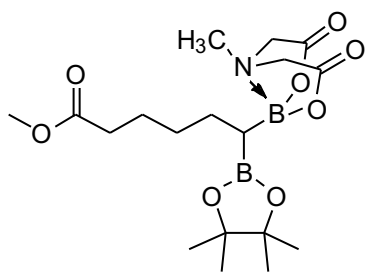

White solid; 30% yield.

$R_f$  (EtOAc) = 0.29.

$^1\text{H}$  NMR (400 MHz,  $\text{CD}_3\text{CN}$ )  $\delta$  3.95 – 3.85 (m, 2H), 3.84 – 3.76 (m, 2H), 3.60 (s, 3H), 2.93 (s, 3H), 2.28 (t,  $J$  = 7.4 Hz, 2H), 1.61 – 1.34 (m, 5H), 1.31 – 1.23 (m, 1H), 1.19 (s, 12H), 0.44 – 0.34 (m, 1H).

$^{13}\text{C}$  NMR (100 MHz,  $\text{CD}_3\text{CN}$ )  $\delta$  174.7, 169.0, 63.0, 51.9, 47.4,

34.4, 25.3, 22.2.

$^{11}\text{B}$  NMR (128 MHz,  $\text{CD}_3\text{CN}$ )  $\delta$  13.39, 35.26.

HRMS-ESI:  $m/z$   $[\text{M}+\text{H}]^+$  for  $\text{C}_{18}\text{H}_{32}\text{B}_2\text{NO}_8$ , calculated 412.2309; observed 412.2312.

Melting point: 189 – 195 °C.

**6-methyl-2-(1-(4,4,5,5-tetramethyl-1,3,2-dioxaborolan-2-yl)hept-6-yn-1-yl)-1,3,6,2-dioxazaborocane-4,8-dione (3p)**

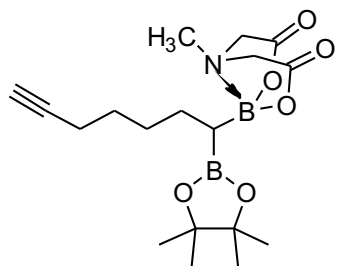

Sticky solid; 67% yield.

$R_f$  (EtOAc) = 0.42.

$^1\text{H}$  NMR (400 MHz,  $\text{CD}_3\text{CN}$ )  $\delta$  3.95 – 3.75 (m, 4H), 2.93 (s, 3H), 2.18 – 2.10 (m, 3H), 1.54 – 1.32 (m, 6H), 1.20 (s, 12H), 0.40 (d,  $J$  = 9.4 Hz, 1H).

$^{13}\text{C}$  NMR (100 MHz,  $\text{CD}_3\text{CN}$ )  $\delta$  169.2, 85.7, 83.8, 69.6, 63.5, 63.4, 46.9, 32.0, 29.6, 26.9, 25.2, 18.7.

$^{11}\text{B}$  NMR (128 MHz,  $\text{CDCl}_3$ )  $\delta$  14.38, 36.23.

HRMS-ESI:  $m/z$   $[\text{M}+\text{H}]^+$  for  $\text{C}_{18}\text{H}_{30}\text{B}_2\text{NO}_6$ , calculated 378.2254; observed 378.2251.

**6-methyl-2-(1-(4,4,5,5-tetramethyl-1,3,2-dioxaborolan-2-yl)but-3-en-1-yl)-1,3,6,2-dioxazaborocane-4,8-dione (3q)**

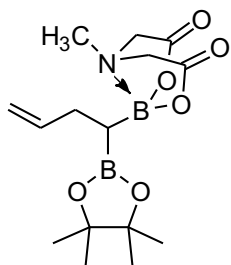

White solid; 70% yield.

$R_f$  (EtOAc) = 0.42.

$^1\text{H}$  NMR (400 MHz,  $\text{CDCl}_3$ )  $\delta$  6.02 – 5.90 (m, 1H), 5.01 (d,  $J$  = 17.0 Hz, 1H), 4.89 (d,  $J$  = 9.7 Hz, 1H), 3.97 – 3.73 (m, 4H), 3.03 (s, 3H), 2.39 – 2.27 (m, 2H), 1.21 (s, 12H), 0.54 – 0.49 (m, 1H).

$^{13}\text{C}$  NMR (100 MHz,  $\text{CDCl}_3$ )  $\delta$  167.4, 167.1, 140.9, 113.7, 83.5, 63.2, 62.8, 46.4, 30.6, 25.2, 25.0.

$^{11}\text{B}$  NMR (128 MHz,  $\text{CDCl}_3$ )  $\delta$  13.63, 35.46.

HRMS-ESI:  $m/z$   $[\text{M}+\text{H}]^+$  for  $\text{C}_{15}\text{H}_{26}\text{B}_2\text{NO}_6$ , calculated 338.1941; observed 338.1949.

Melting point: 175 – 178 °C.

### Isomerization of 3q

To a solution of **3q** (1.2 mmol) in DCM (4 mL), [CpRu(P-N)(MeCN)]PF<sub>6</sub> (0.02 eq) was added.<sup>15</sup> The reaction vial was evacuated and filled with nitrogen (three cycles) and stirred at 23 °C. The reaction was monitored by NMR. Upon completion (after 15 h), the reaction mixture was filtered through a short plug of silica and rinsed with EtOAc. The filtrate was evaporated to afford the product as a yellowish solid which was found to be analytically pure.

### 6-methyl-2-(1-(4,4,5,5-tetramethyl-1,3,2-dioxaborolan-2-yl)but-2-en-1-yl)-1,3,6,2-dioxazaborocane-4,8-dione (**3r**)

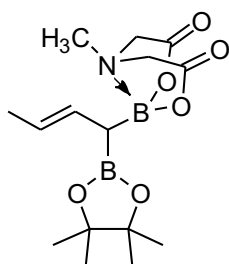

White solid; 99% yield.

R<sub>f</sub> (EtOAc) = 0.42.

<sup>1</sup>H NMR (400 MHz, CDCl<sub>3</sub>) δ 5.56 – 5.46 (m, 1H), 5.40 – 5.28 (m, 1H), 3.90 – 3.68 (m, 4H), 2.99 (s, 3H), 1.63 (d, *J* = 5.9 Hz, 3H), 1.54 (d, *J* = 8.7 Hz, 1H), 1.26 – 1.16 (m, 12H).

<sup>13</sup>C NMR (100 MHz, CDCl<sub>3</sub>) δ 167.8, 167.5, 128.0, 125.2, 83.4, 62.9, 45.9, 24.9, 18.5.

<sup>11</sup>B NMR (128 MHz, CDCl<sub>3</sub>) δ 12.60, 34.24.

HRMS-ESI: *m/z* [M+Na]<sup>+</sup> for C<sub>15</sub>H<sub>25</sub>B<sub>2</sub>NO<sub>6</sub>Na, calculated 360.1761; observed 360.1766.

Melting point: 83 – 85 °C.

### 6-methyl-2-((4,4,5,5-tetramethyl-1,3,2-dioxaborolan-2-yl)methyl)-1,3,6,2-dioxazaborocane-4,8-dione (**3s**)

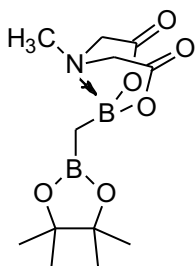

White solid; 40% yield.

R<sub>f</sub> (EtOAc) = 0.25.

<sup>1</sup>H NMR (400 MHz, CD<sub>3</sub>CN) δ 3.96 – 3.77 (m, 4H), 2.90 (s, 3H), 1.20 (s, 12H), 0.08 (s, 2H).

<sup>13</sup>C NMR (100 MHz, CD<sub>3</sub>CN) δ 169.1, 83.8, 63.0, 47.1, 25.1.

<sup>11</sup>B NMR (128 MHz, CD<sub>3</sub>CN) δ 13.43, 34.32.

HRMS-ESI: *m/z* [M+H]<sup>+</sup> for C<sub>12</sub>H<sub>22</sub>B<sub>2</sub>NO<sub>6</sub>, calculated 298.1628; observed 298.1626.

Melting point: 174 – 181 °C.

### Attempted conversion of a 1,1,2-triBpin compound (**2t**) into unsymmetrical geminal diborylalkane

**2t** (0.8 mmol) and methyliminodiacetic acid (MIDA, 6 equiv) were placed in a thick wall high-pressure reaction tube equipped with a stir bar. DMSO (3 mL) and HC(OEt)<sub>3</sub> (4 equiv)<sup>13</sup> were added to the tube and purged with nitrogen, the resulting mixture was stirred at 130 °C for 16 h. The reaction mixture was then cooled to room temperature and diluted with 15 mL H<sub>2</sub>O. The mixture was extracted with EtOAc (3 x 200 mL). The combined organic phases were washed with brine,

and then dried over  $\text{Na}_2\text{SO}_4$ , filtered, and concentrated. The resulting residue was subjected to flash column chromatography (silica gel; EtOAc/hexanes, 0:10 to 10:0) to obtain **3t** and **3t'** as an inseparable mixture (1:1 ratio, NMR).

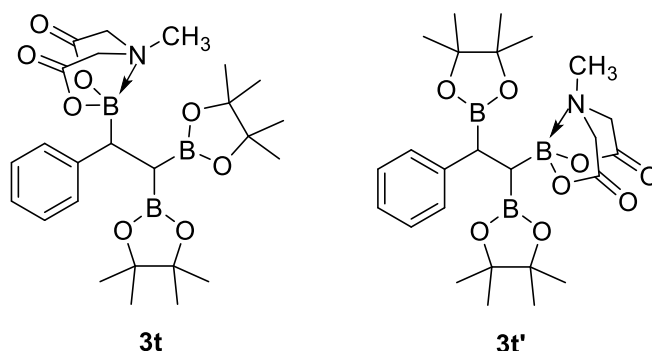

**Table S2. Optimization of reaction conditions for synthesis of  $\alpha$ -hydroxy MIDA boronate**

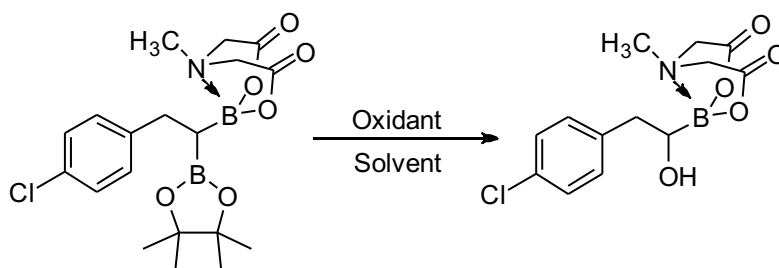

| Entry | Oxidant                                  | Solvent (v/v)                    | Temp. / Time (h) | Yield            |
|-------|------------------------------------------|----------------------------------|------------------|------------------|
| 1     | $\text{NaBO}_3 \cdot \text{H}_2\text{O}$ | ACN                              | 23 °C / 3 h      | ND <sup>a</sup>  |
| 2     | $\text{NaBO}_3 \cdot \text{H}_2\text{O}$ | ACN                              | 60 °C / 3 h      | ND               |
| 3     | $\text{NaBO}_3 \cdot \text{H}_2\text{O}$ | THF                              | 23 °C / 3 h      | ND               |
| 4     | $\text{NaBO}_3 \cdot \text{H}_2\text{O}$ | THF / buffer (pH=7) (1:1)        | 23 °C / 3 h      | 70% <sup>b</sup> |
| 5     | $\text{NaBO}_3 \cdot \text{H}_2\text{O}$ | THF / $\text{H}_2\text{O}$ (1:1) | 23 °C / 3 h      | 52% <sup>b</sup> |
| 6     | Oxone                                    | THF / buffer (1:1)               | 23 °C / 15 h     | 59% <sup>c</sup> |

<sup>a</sup> Not Detected, <sup>b</sup> Isolated yield, <sup>c</sup> NMR yield.

### 3. General procedure for the synthesis of MIDA-hydroxyboronate (**4**)

To a stirred mixture of **3** (0.8 mmol) in THF (1.5 mL) and buffer ( $\text{KH}_2\text{PO}_4/\text{NaOH}$ , pH = 7, 1M, 1.5 mL) at 0 °C,  $\text{NaBO}_3 \cdot \text{H}_2\text{O}$  (1.3 equiv) was added. The reaction mixture was allowed to reach room temperature (23 °C) over 3 h. Thereafter, dry  $\text{Na}_2\text{SO}_4$  was added, the reaction mixture was filtered and the residue washed with EtOAc. The filtrate was concentrated to give a residue which was subjected to flash column chromatography (silica gel; EtOAc/hexanes, 0:10 to 10:0) to obtain the pure product.

**2-(1-hydroxy-2-phenylethyl)-6-methyl-1,3,6,2-dioxazaborocane-4,8-dione (4a)**<sup>16</sup>

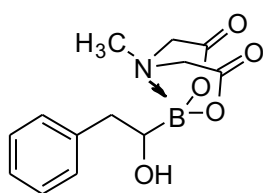

Colorless oil; 73% yield.

$R_f$  (EtOAc) = 0.23.

$^1\text{H}$  NMR (400 MHz,  $\text{CD}_3\text{CN}$ )  $\delta$  7.35 – 7.23 (m, 4H), 7.24 – 7.18 (m, 1H), 4.01 – 3.76 (m, 4H), 3.51 (m, 1H), 3.02 (s, 3H), 2.94 – 2.84 (m, 1H), 2.72 – 2.61 (m, 1H), 2.19 (m, 1H).

$^{13}\text{C}$  NMR (100 MHz,  $\text{CD}_3\text{OD}$ )  $\delta$  171.3, 170.6, 142.1, 130.4, 129.2, 126.9, 63.6, 63.4, 46.1, 40.6.

$^{11}\text{B}$  NMR (128 MHz,  $\text{CD}_3\text{OD}$ )  $\delta$  11.37.

**2-(1-hydroxy-2-(p-tolyl)ethyl)-6-methyl-1,3,6,2-dioxazaborocane-4,8-dione (4b)**

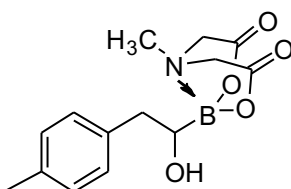

Colorless oil; 73% yield.

$R_f$  (EtOAc) = 0.23.

$^1\text{H}$  NMR (400 MHz,  $\text{CD}_3\text{OD}$ )  $\delta$  7.18 – 7.05 (m, 4H), 4.23 – 4.04 (m, 2H), 4.01 – 3.87 (m, 2H), 3.56 – 3.41 (m, 1H), 3.08 (s, 3H), 2.91 – 2.81 (m, 1H), 2.73 – 2.61 (m, 1H), 2.29 (s, 3H). Exchangeable proton (OH) was

not detected.

$^{13}\text{C}$  NMR (100 MHz,  $\text{CD}_3\text{CN}$ )  $\delta$  170.0, 169.1, 138.3, 136.3, 130.2, 129.8, 63.3, 63.0, 46.3, 39.9, 21.1.

$^{11}\text{B}$  NMR (128 MHz,  $\text{CD}_3\text{CN}$ )  $\delta$  10.99.

HRMS-ESI:  $m/z$   $[\text{M}+\text{Na}]^+$  for  $\text{C}_{14}\text{H}_{18}\text{BNO}_5\text{Na}$ , calculated 314.1172; observed 314.1171.

**2-(1-hydroxy-2-(o-tolyl)ethyl)-6-methyl-1,3,6,2-dioxazaborocane-4,8-dione (4c)**

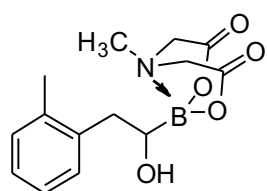

Sticky liquid; 75% yield.

$R_f$  (EtOAc) = 0.23.

$^1\text{H}$  NMR (400 MHz,  $\text{CD}_3\text{CN}$ )  $\delta$  7.20 – 7.14 (m, 2H), 7.13 – 7.09 (m, 2H), 4.00 – 3.87 (m, 2H), 3.85 – 3.79 (m, 2H), 3.49 (d,  $J$  = 11.5 Hz, 1H), 3.02 (s, 3H), 2.95 – 2.87 (m, 1H), 2.76 – 2.63 (m, 1H), 2.32 (s, 3H).

Exchangeable proton (OH) was not detected.

$^{13}\text{C}$  NMR (101 MHz,  $\text{CD}_3\text{CN}$ )  $\delta$  169.9, 169.1, 139.5, 137.6, 131.1, 127.0, 126.6, 63.3, 63.1, 46.2, 37.5, 19.8.

$^{11}\text{B}$  NMR (128 MHz,  $\text{CD}_3\text{CN}$ )  $\delta$  10.97.

HRMS-ESI:  $m/z$   $[\text{M}+\text{Na}]^+$  for  $\text{C}_{14}\text{H}_{18}\text{BNO}_5\text{Na}$ , calculated 314.1172; observed 314.1171.



**2-(2-(4-chlorophenyl)-1-hydroxyethyl)-6-methyl-1,3,6,2-dioxazaborocane-4,8-dione (4d)**

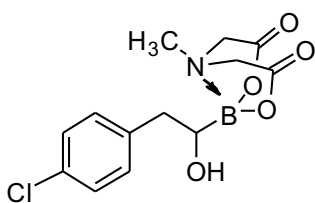

Sticky solid; 70% yield.

$R_f$  (EtOAc) = 0.23.

$^1\text{H NMR}$  (400 MHz,  $\text{CD}_3\text{CN}$ )  $\delta$  7.34 – 7.21 (m, 4H), 4.03 – 3.76 (m, 4H), 3.52 – 3.42 (m, 1H), 3.01 (s, 3H), 2.89 – 2.82 (m, 1H), 2.76 – 2.62 (m, 1H), 2.37 – 2.27 (m, 1H).

$^{13}\text{C NMR}$  (100 MHz,  $\text{CD}_3\text{OD}$ )  $\delta$  171.2, 170.5, 140.9, 132.6, 132.0,

129.2, 63.6, 63.4, 46.1, 40.0.

$^{11}\text{B NMR}$  (128 MHz,  $\text{CD}_3\text{CN}$ )  $\delta$  11.16.

HRMS-ESI:  $m/z$   $[\text{M}+\text{Na}]^+$  for  $\text{C}_{13}\text{H}_{15}\text{BCINO}_5\text{Na}$ , calculated 334.0625; observed 334.0625.

**2-(2-(2,4-difluorophenyl)-1-hydroxyethyl)-6-methyl-1,3,6,2-dioxazaborocane-4,8-dione (4e)**

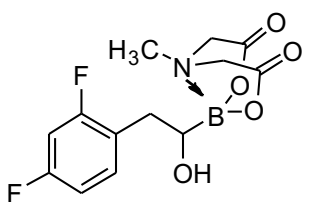

Sticky liquid; 95% yield.

$R_f$  (EtOAc) = 0.23.

$^1\text{H NMR}$  (400 MHz,  $\text{CD}_3\text{OD}$ )  $\delta$  7.32 (q,  $J$  = 8.3 Hz, 1H), 6.86 (t,  $J$  = 8.7 Hz, 2H), 4.23 – 4.07 (m, 2H), 4.01 – 3.87 (m, 2H), 3.51 (m, 1H), 3.09 (s, 3H), 2.99 – 2.93 (m, 1H), 2.79 – 2.69 (m, 1H). Exchangeable proton (OH) was not detected.

$^{13}\text{C NMR}$  (100 MHz,  $\text{CD}_3\text{OD}$ )  $\delta$  171.2, 170.6, 164.05 (dd,  $J_{\text{C-F}}$  = 11.4, 22.2 Hz), 161.62 (dd,  $J_{\text{C-F}}$  = 11.4, 25.6 Hz), 133.85 (dd,  $J_{\text{C-F}}$  = 6.7, 9.4 Hz), 124.72, 124.68, 124.6, 124.5, 111.7, 111.6, 111.5, 111.4, 104.4, 104.1, 103.8, 63.6, 63.4, 46.1, 33.4.

$^{11}\text{B NMR}$  (128 MHz,  $\text{CD}_3\text{CN}$ )  $\delta$  10.84.

$^{19}\text{F NMR}$  (376 MHz,  $\text{CDCl}_3$ )  $\delta$  -115.38, -115.68.

HRMS-ESI:  $m/z$   $[\text{M}+\text{Na}]^+$  for  $\text{C}_{13}\text{H}_{14}\text{BF}_2\text{NO}_5\text{Na}$ , calculated 336.0826; observed 336.0826.

**2-(1-hydroxypentyl)-6-methyl-1,3,6,2-dioxazaborocane-4,8-dione (4f)<sup>16</sup>**

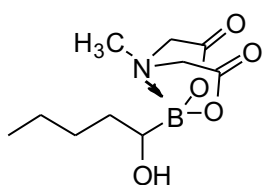

Colorless oil; 87% yield.

$R_f$  (EtOAc) = 0.16.

$^1\text{H NMR}$  (400 MHz,  $\text{CD}_3\text{CN}$ )  $\delta$  3.96 – 3.73 (m, 4H), 3.24 (s, 1H), 3.02 (s, 3H), 2.33 (s, 1H), 1.53 – 1.41 (m, 3H), 1.39 – 1.23 (m, 3H), 0.95 – 0.83 (m, 3H).

$^{13}\text{C NMR}$  (100 MHz,  $\text{CD}_3\text{CN}$ )  $\delta$  170.0, 169.0, 63.3, 62.9, 46.2, 34.0, 29.4, 23.5, 14.4.

$^{11}\text{B NMR}$  (128 MHz,  $\text{CD}_3\text{CN}$ )  $\delta$  16.44.

**2-(2-cyclopentyl-1-hydroxyethyl)-6-methyl-1,3,6,2-dioxazaborocane-4,8-dione (4g)**

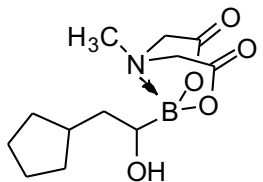

Sticky solid; 98% yield.

$R_f$  (EtOAc) = 0.16.

$^1\text{H NMR}$  (400 MHz,  $\text{CD}_3\text{CN}$ )  $\delta$  3.95 – 3.85 (m, 2H), 3.84 – 3.74 (m, 2H), 3.35 – 3.29 (m, 1H), 3.02 (s, 3H), 2.30 (d,  $J$  = 5.1 Hz, 1H), 2.07 – 1.98 (m, 1H), 1.86 – 1.75 (m, 2H), 1.64 – 1.50 (m, 4H), 1.44 – 1.36 (m, 1H), 1.18 –

1.05 (m, 3H). Exchangeable proton (OH) was not detected.

$^{13}\text{C}$  NMR (100 MHz,  $\text{CD}_3\text{OD}$ )  $\delta$  171.4, 170.7, 63.6, 63.3, 46.0, 40.7, 37.7, 34.5, 33.0, 26.2, 26.0.

$^{11}\text{B}$  NMR (128 MHz,  $\text{CD}_3\text{CN}$ )  $\delta$  11.13.

HRMS-ESI:  $m/z$   $[\text{M}+\text{Na}]^+$  for  $\text{C}_{12}\text{H}_{20}\text{BNO}_5\text{Na}$ , calculated 292.1327; observed 292.1328.

#### 2-(2-cyclohexyl-1-hydroxyethyl)-6-methyl-1,3,6,2-dioxazaborocane-4,8-dione (4h)

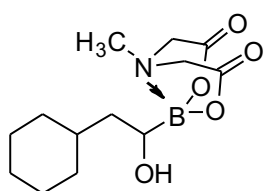

Colorless oil; 82% yield.

$R_f$  (EtOAc) = 0.16.

$^1\text{H}$  NMR (400 MHz,  $\text{CD}_3\text{CN}$ )  $\delta$  3.96 – 3.85 (m, 2H), 3.85 – 3.73 (m, 2H), 3.44 – 3.36 (m, 1H), 3.02 (s, 3H), 2.25 (d,  $J$  = 5.2 Hz, 1H), 1.87 (d,  $J$  = 13.5 Hz, 1H), 1.73 – 1.62 (m, 4H), 1.50 – 1.39 (m, 2H), 1.31 – 1.17 (m, 4H),

1.04 – 0.92 (m, 1H), 0.86 – 0.74 (m, 1H).

$^{13}\text{C}$  NMR (100 MHz,  $\text{CD}_3\text{CN}$ )  $\delta$  169.9, 169.0, 63.3, 63.0, 46.2, 41.8, 35.5, 34.3, 33.0, 27.5, 27.4, 27.0.

$^{11}\text{B}$  NMR (128 MHz,  $\text{CD}_3\text{CN}$ )  $\delta$  11.12.

HRMS-ESI:  $m/z$   $[\text{M}+\text{Na}]^+$  for  $\text{C}_{13}\text{H}_{22}\text{BNO}_5\text{Na}$ , calculated 306.1484; observed 306.1483.

#### 2-(2-cyclopropyl-1-hydroxyethyl)-6-methyl-1,3,6,2-dioxazaborocane-4,8-dione (4i)

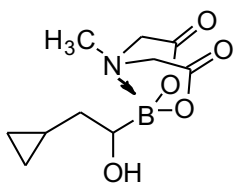

Sticky liquid; 94% yield.

$R_f$  (EtOAc) = 0.16.

$^1\text{H}$  NMR (400 MHz,  $\text{CD}_3\text{CN}$ )  $\delta$  3.94 – 3.86 (m, 2H), 3.84 – 3.75 (m, 2H), 3.41 – 3.33 (m, 1H), 3.03 (s, 3H), 2.44 (d,  $J$  = 4.0 Hz, 1H), 1.52 – 1.43 (m, 1H), 1.33 – 1.24 (m, 1H), 0.88 – 0.79 (m, 1H), 0.52 – 0.43 (m, 1H), 0.41 – 0.34

(m, 1H), 0.14 – 0.08 (m, 1H), 0.03 – -0.03 (m, 1H).

$^{13}\text{C}$  NMR (100 MHz,  $\text{CD}_3\text{CN}$ )  $\delta$  170.0, 169.1, 63.3, 62.9, 46.2, 39.2, 9.2, 5.7, 4.1.

$^{11}\text{B}$  NMR (128 MHz,  $\text{CD}_3\text{CN}$ )  $\delta$  13.46.

HRMS-ESI:  $m/z$   $[\text{M}+\text{Na}]^+$  for  $\text{C}_{10}\text{H}_{16}\text{BNO}_5\text{Na}$ , calculated 264.1014; observed 264.1025.

#### 2-(1-hydroxy-2-(thiophen-3-yl)ethyl)-6-methyl-1,3,6,2-dioxazaborocane-4,8-dione (4j)

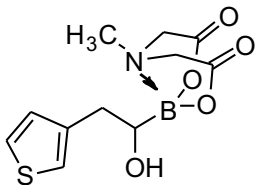

Yellow sticky solid; 69% yield.

$R_f$  (EtOAc) = 0.22.

$^1\text{H}$  NMR (400 MHz,  $\text{CD}_3\text{CN}$ )  $\delta$  7.34 (s, 1H), 7.07 (d,  $J$  = 29.4 Hz, 2H), 4.06 – 3.72 (m, 4H), 3.53 – 3.41 (m, 1H), 3.02 (s, 3H), 2.92 – 2.83 (m, 1H), 2.79 – 2.68 (m, 1H), 2.24 (s, 1H).

$^{13}\text{C}$  NMR (100 MHz,  $\text{CD}_3\text{CN}$ )  $\delta$  169.9, 169.0, 141.8, 129.8, 126.4, 122.6, 63.3, 63.1, 46.3, 34.8.

$^{11}\text{B}$  NMR (128 MHz,  $\text{CD}_3\text{CN}$ )  $\delta$  11.06.

HRMS-ESI:  $m/z$   $[\text{M}+\text{Na}]^+$  for  $\text{C}_{11}\text{H}_{14}\text{BNO}_5\text{SNa}$ , calculated 306.0578; observed 306.0583.

### 2-(1-hydroxy-3-methoxypropyl)-6-methyl-1,3,6,2-dioxazaborocane-4,8-dione (4k)

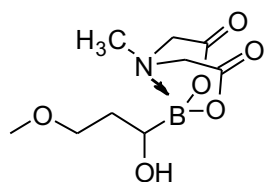

Sticky solid; 75% yield.

$R_f$  (EtOAc) = 0.13.

$^1\text{H}$  NMR (400 MHz,  $\text{CD}_3\text{CN}$ )  $\delta$  3.98 – 3.86 (m, 2H), 3.85 – 3.76 (m, 2H), 3.62 – 3.56 (m, 1H), 3.55 – 3.48 (m, 1H), 3.48 – 3.40 (m, 1H), 3.30 (s, 3H), 3.03 (s, 3H), 1.72 (q,  $J$  = 5.9 Hz, 2H). Exchangeable proton (OH) was not

detected.

$^{13}\text{C}$  NMR (100 MHz,  $\text{CD}_3\text{CN}$ )  $\delta$  169.9, 169.0, 72.8, 63.3, 63.0, 58.9, 46.2, 33.4.

$^{11}\text{B}$  NMR (128 MHz,  $\text{CD}_3\text{CN}$ )  $\delta$  10.92.

HRMS-ESI:  $m/z$   $[\text{M}+\text{Na}]^+$  for  $\text{C}_9\text{H}_{16}\text{BNO}_6\text{Na}$ , calculated 268.0963; observed 268.0964.

### 2-(1-hydroxyoctyl)-6-methyl-1,3,6,2-dioxazaborocane-4,8-dione (4l)

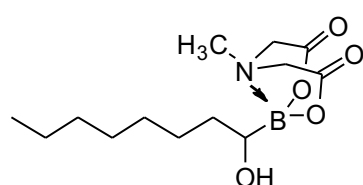

Colorless oil; 80% yield.

$R_f$  (EtOAc) = 0.16.

$^1\text{H}$  NMR (400 MHz,  $\text{CD}_3\text{CN}$ )  $\delta$  3.96 – 3.85 (m, 2H), 3.84 – 3.75 (m, 2H), 3.28 – 3.22 (m, 1H), 3.02 (s, 3H), 2.35 (br s, 1H), 1.53 – 1.44 (m, 3H), 1.30 (br s, 9H), 0.89 (t,  $J$  = 6.5 Hz, 3H).

$^{13}\text{C}$  NMR (100 MHz,  $\text{CD}_3\text{CN}$ )  $\delta$  170.1, 169.2, 63.3, 63.0, 46.2, 34.3, 32.7, 30.4, 30.1, 27.1, 23.4, 14.4.

$^{11}\text{B}$  NMR (128 MHz,  $\text{CD}_3\text{CN}$ )  $\delta$  11.19.

HRMS-ESI:  $m/z$   $[\text{M}+\text{Na}]^+$  for  $\text{C}_{13}\text{H}_{24}\text{BNO}_5\text{Na}$ , calculated 308.1640; observed 308.1637.

### 2-(3-cyclohexyl-1-hydroxypropyl)-6-methyl-1,3,6,2-dioxazaborocane-4,8-dione (4m)

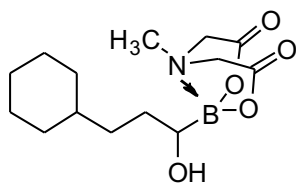

Colorless oil; 68% yield.

$R_f$  (EtOAc) = 0.16.

$^1\text{H}$  NMR (400 MHz,  $\text{CD}_3\text{OD}$ )  $\delta$  4.19 – 4.02 (m, 2H), 3.97 – 3.87 (m, 2H), 3.26 – 3.20 (m, 1H), 3.09 (s, 3H), 1.80 – 1.58 (m, 6H), 1.55 – 1.41 (m, 2H), 1.30 – 1.09 (m, 5H), 1.00 – 0.85 (m, 2H). Exchangeable proton

(OH) was not detected.

$^{13}\text{C}$  NMR (100 MHz,  $\text{CD}_3\text{OD}$ )  $\delta$  171.5, 170.7, 63.6, 63.3, 46.1, 39.2, 35.4, 34.8, 34.5, 31.7, 27.9, 27.5.

$^{11}\text{B}$  NMR (128 MHz,  $\text{CD}_3\text{CN}$ )  $\delta$  11.14.

HRMS-ESI:  $m/z$   $[\text{M}+\text{Na}]^+$  for  $\text{C}_{14}\text{H}_{24}\text{BNO}_5\text{Na}$ , calculated 320.1640; observed 320.1642.

### 2-(6-chloro-1-hydroxyhexyl)-6-methyl-1,3,6,2-dioxazaborocane-4,8-dione (4n)

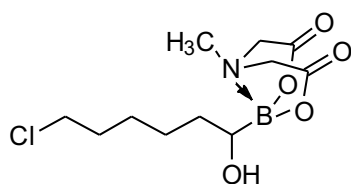

Colorless oil; 80% yield.

$R_f$  (EtOAc) = 0.25.

$^1\text{H}$  NMR (400 MHz,  $\text{CD}_3\text{CN}$ )  $\delta$  3.95 – 3.85 (m, 2H), 3.84 – 3.74 (m, 2H), 3.59 (t,  $J$  = 6.7 Hz, 2H), 3.29 – 3.20 (m, 1H), 3.02 (s, 3H), 2.34 (d,  $J$  = 5.1 Hz, 1H), 1.83 – 1.70 (m, 2H), 1.57 – 1.29 (m, 6H).

$^{13}\text{C}$  NMR (100 MHz,  $\text{CD}_3\text{CN}$ )  $\delta$  169.9, 169.0, 63.2, 62.9, 46.3, 46.2, 34.1, 33.4, 27.6, 26.3.

$^{11}\text{B}$  NMR (128 MHz,  $\text{CD}_3\text{CN}$ )  $\delta$  11.31.

HRMS-ESI:  $m/z$   $[\text{M}+\text{Na}]^+$  for  $\text{C}_{11}\text{H}_{19}\text{BCINO}_5\text{Na}$ , calculated 314.0937; observed 314.0942.

#### Methyl 6-hydroxy-6-(6-methyl-4,8-dioxo-1,3,6,2-dioxazaborocan-2-yl)hexanoate (4o)

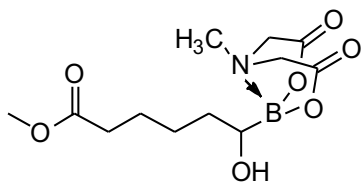

Colorless oil; 60% yield.

$R_f$  (EtOAc) = 0.20.

$^1\text{H}$  NMR (400 MHz,  $\text{CD}_3\text{CN}$ )  $\delta$  3.94 – 3.85 (m, 2H), 3.84 – 3.74 (m, 2H), 3.61 (s, 3H), 3.24 (s, 1H), 3.01 (s, 3H), 2.40 – 2.35 (m, 1H), 2.31 (t,  $J$  = 7.4 Hz, 2H), 1.67 – 1.42 (m, 5H), 1.38 – 1.27 (m, 1H).

$^{13}\text{C}$  NMR (100 MHz,  $\text{CD}_3\text{CN}$ )  $\delta$  174.9, 169.9, 169.0, 63.2, 62.9, 51.9, 46.2, 34.6, 33.9, 26.6, 25.7.

$^{11}\text{B}$  NMR (128 MHz,  $\text{CD}_3\text{CN}$ )  $\delta$  11.01.

HRMS-ESI:  $m/z$   $[\text{M}+\text{H}]^+$  for  $\text{C}_{12}\text{H}_{21}\text{BNO}_7$ , calculated 302.1406; observed 302.1401.

#### 2-(1-hydroxyhept-6-yn-1-yl)-6-methyl-1,3,6,2-dioxazaborocane-4,8-dione (4p)

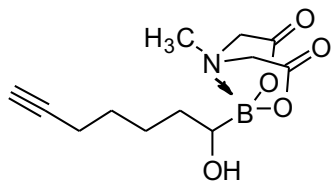

Sticky solid; 67% yield.

$R_f$  (EtOAc) = 0.21.

$^1\text{H}$  NMR (400 MHz,  $\text{CD}_3\text{CN}$ )  $\delta$  3.96 – 3.86 (m, 2H), 3.85 – 3.76 (m, 2H), 3.30 – 3.18 (m, 1H), 3.02 (s, 3H), 2.43 – 2.34 (m, 1H), 2.19 (s, 2H), 2.15 (s, 1H), 1.60 – 1.37 (m, 6H).

$^{13}\text{C}$  NMR (100 MHz, DMSO)  $\delta$  169.7, 168.5, 84.7, 71.0, 62.2, 61.8, 45.2, 32.8, 28.4, 25.3, 17.8.

$^{11}\text{B}$  NMR (128 MHz,  $\text{CD}_3\text{CN}$ )  $\delta$  11.04.

HRMS-ESI:  $m/z$   $[\text{M}+\text{H}]^+$  for  $\text{C}_{12}\text{H}_{19}\text{BNO}_5$ , calculated 268.1351; observed 268.1349.

#### 2-(1-hydroxybut-2-en-1-yl)-6-methyl-1,3,6,2-dioxazaborocane-4,8-dione (4q)

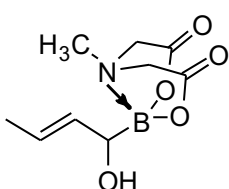

White solid; 65% yield.

$R_f$  (EtOAc) = 0.21.

$^1\text{H}$  NMR (400 MHz,  $\text{CD}_3\text{CN}$ )  $\delta$  5.79 – 5.42 (m, 2H), 3.95 – 3.74 (m, 5H), 3.03 (s, 3H), 2.53 (s, 1H), 1.68 (s, 3H).

$^{13}\text{C}$  NMR (100 MHz,  $\text{CD}_3\text{CN}$ )  $\delta$  169.8, 169.1, 133.7, 124.4, 63.1, 46.3, 18.1.

$^{11}\text{B}$  NMR (128 MHz,  $\text{CD}_3\text{CN}$ )  $\delta$  10.44.

HRMS-ESI:  $m/z$   $[\text{M}+\text{H}]^+$  for  $\text{C}_9\text{H}_{15}\text{BNO}_5$ , calculated 228.1038; observed 228.1041.

Melting point: 63 – 65 °C.

#### 2-(hydroxymethyl)-6-methyl-1,3,6,2-dioxazaborocane-4,8-dione (4s)<sup>17</sup>

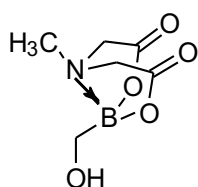

White solid; 44% yield.

$R_f$  (Acetonitrile:EtOAc = 2:8) = 0.28.

$^1\text{H}$  NMR (400 MHz,  $\text{CD}_3\text{CN}$ )  $\delta$  4.01 – 3.76 (m, 4H), 3.23 (s, 2H), 3.03 (s, 3H), 2.33 (s, 1H).

$^{13}\text{C}$  NMR (100 MHz,  $\text{CD}_3\text{CN}$ )  $\delta$  169.39, 63.11, 46.47.

$^{11}\text{B}$  NMR (128 MHz,  $\text{CD}_3\text{CN}$ )  $\delta$  11.32.

HRMS-ESI:  $m/z$   $[\text{M}+\text{H}]^+$  for  $\text{C}_6\text{H}_{11}\text{BNO}_5$ , calculated 188.0725; observed 188.0722.

Melting point: 132 – 135  $^\circ\text{C}$ .

#### 4. General procedure for the synthesis of MIDA-acylboronate 5

To a solution of  $\alpha$ -hydroxyboronate **4** (0.5 mmol) in 2 mL of DCM, Dess-Martin periodinane (DMP, 1.1 equiv) was added.<sup>16</sup> The resulting mixture was stirred for 30 min and then washed sequentially with 10%  $\text{Na}_2\text{S}_2\text{O}_3$  (2 ml), saturated aqueous  $\text{NaHCO}_3$  (2 ml), followed by  $\text{H}_2\text{O}$  (2 ml) and brine (3 ml). The organic phase was dried over  $\text{Na}_2\text{SO}_4$  and concentrated. The crude solid was further purified using flash column chromatography (EtOAc/hexanes 0:10 to 10:0) to afford the pure product (**5**).

#### 6-methyl-2-(2-phenylacetyl)-1,3,6,2-dioxazaborocane-4,8-dione (**5a**)<sup>16</sup>

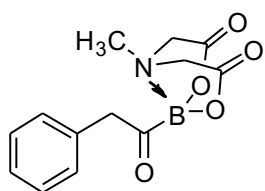

Sticky solid; 63% yield.

$R_f$  (EtOAc) = 0.48.

$^1\text{H}$  NMR (400 MHz,  $\text{CD}_3\text{CN}$ )  $\delta$  7.35 – 7.27 (m, 2H), 7.28 – 7.19 (m, 1H), 7.18 – 7.11 (m, 2H), 4.06 – 3.95 (m, 4H), 3.88 – 3.80 (m, 2H), 2.74 (s, 3H).

$^{13}\text{C}$  NMR (100 MHz,  $\text{CD}_3\text{CN}$ )  $\delta$  168.9, 135.1, 131.0, 129.3, 127.4, 63.0,

54.0, 47.5

$^{11}\text{B}$  NMR (128 MHz,  $\text{CD}_3\text{CN}$ )  $\delta$  4.51.

#### 6-methyl-2-(2-(p-tolyl)acetyl)-1,3,6,2-dioxazaborocane-4,8-dione (**5b**)

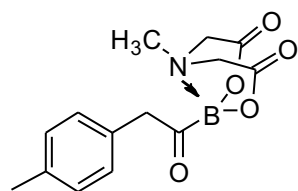

Sticky solid; 55% yield.

$R_f$  (EtOAc) = 0.48.

$^1\text{H}$  NMR (400 MHz,  $\text{CD}_3\text{CN}$ )  $\delta$  7.12 (d,  $J$  = 7.8 Hz, 2H), 7.02 (d,  $J$  = 7.9 Hz, 2H), 4.01 (d,  $J$  = 17.0 Hz, 2H), 3.91 (s, 2H), 3.82 (d,  $J$  = 16.9 Hz, 2H), 2.73 (s, 3H), 2.30 (s, 3H).

$^{13}\text{C}$  NMR (100 MHz,  $\text{CD}_3\text{CN}$ )  $\delta$  169.0, 137.1, 131.8, 130.9, 129.9, 63.0, 53.6, 47.5, 21.1.

$^{11}\text{B}$  NMR (128 MHz,  $\text{CD}_3\text{CN}$ )  $\delta$  4.49.

HRMS-ESI:  $m/z$   $[\text{M}+\text{Na}]^+$  for  $\text{C}_{14}\text{H}_{16}\text{BNO}_5\text{Na}$ , calculated 312.1014; observed 312.1014.

#### 6-methyl-2-(2-(o-tolyl)acetyl)-1,3,6,2-dioxazaborocane-4,8-dione (**5c**)

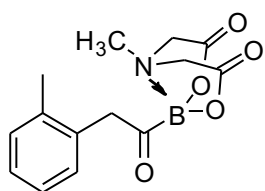

Sticky solid; 73% yield.

$R_f$  (EtOAc) = 0.48.

$^1\text{H}$  NMR (400 MHz,  $\text{CD}_3\text{CN}$ )  $\delta$  7.18 – 7.09 (m, 3H), 7.04 (d,  $J$  = 7.5 Hz, 1H), 4.07 – 4.00 (m, 4H), 3.87 (d,  $J$  = 16.9 Hz, 2H), 2.81 (s, 3H), 2.15 (s, 3H).

$^{13}\text{C}$  NMR (100 MHz,  $\text{CD}_3\text{CN}$ )  $\delta$  169.0, 138.3, 134.4, 131.7, 130.9, 127.8, 126.7, 63.1, 52.3, 47.5, 19.9.

$^{11}\text{B}$  NMR (128 MHz,  $\text{CD}_3\text{CN}$ )  $\delta$  4.49.

HRMS-ESI:  $m/z$   $[\text{M}+\text{Na}]^+$  for  $\text{C}_{14}\text{H}_{16}\text{BNO}_5\text{Na}$ , calculated 312.1014; observed 312.1014.

### 2-(2-(4-chlorophenyl)acetyl)-6-methyl-1,3,6,2-dioxazaborocane-4,8-dione (5d)

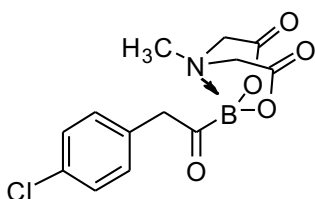

Sticky solid; 50% yield.

$R_f$  (EtOAc) = 0.48.

$^1\text{H}$  NMR (400 MHz,  $\text{CD}_3\text{CN}$ )  $\delta$  7.32 (d,  $J$  = 8.1 Hz, 2H), 7.12 (d,  $J$  = 7.9 Hz, 2H), 4.06 – 4.00 (m, 2H), 3.98 (s, 2H), 3.88 (d,  $J$  = 17.0 Hz, 2H), 2.78 (s, 3H).

$^{13}\text{C}$  NMR (100 MHz,  $\text{CD}_3\text{CN}$ )  $\delta$  168.9, 134.1, 132.8, 132.6, 129.1,

63.1, 53.0, 47.5.

$^{11}\text{B}$  NMR (128 MHz,  $\text{CD}_3\text{CN}$ )  $\delta$  4.49.

HRMS-ESI:  $m/z$   $[\text{M}+\text{Na}]^+$  for  $\text{C}_{13}\text{H}_{13}\text{BClNO}_5\text{Na}$ , calculated 332.0465; observed 332.0468.

### 2-(2-(2,4-difluorophenyl)acetyl)-6-methyl-1,3,6,2-dioxazaborocane-4,8-dione (5e)

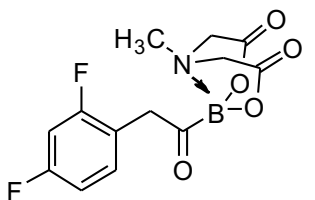

White solid; 53% yield.

$R_f$  (EtOAc) = 0.48.

$^1\text{H}$  NMR (400 MHz,  $\text{CD}_3\text{CN}$ )  $\delta$  7.16 (q,  $J$  = 7.9 Hz, 1H), 6.92 (t,  $J$  = 8.6 Hz, 2H), 4.08 (s, 1H), 4.04 (s, 1H), 4.03 (s, 2H), 3.91 (d,  $J$  = 17.0 Hz, 2H), 2.85 (s, 3H).

$^{13}\text{C}$  NMR (100 MHz,  $\text{CD}_3\text{CN}$ )  $\delta$  168.9, 134.1, 134.05, 133.98, 133.9, 111.91 (dd,  $J_{\text{C-F}}$  = 3.5, 21.0 Hz), 104.15 (t,  $J_{\text{C-F}}$  = 26.5 Hz), 63.1, 47.6, 47.3.

$^{11}\text{B}$  NMR (128 MHz,  $\text{CD}_3\text{CN}$ )  $\delta$  7.00.

$^{19}\text{F}$  NMR (376 MHz,  $\text{CD}_3\text{CN}$ )  $\delta$  -113.85, -114.24.

HRMS-ESI:  $m/z$   $[\text{M}+\text{Na}]^+$  for  $\text{C}_{13}\text{H}_{12}\text{BF}_2\text{NO}_5\text{Na}$ , calculated 334.0669; observed 334.0664.

Melting point: > 250 °C.

### 6-methyl-2-pentanoyl-1,3,6,2-dioxazaborocane-4,8-dione (5f)<sup>16</sup>

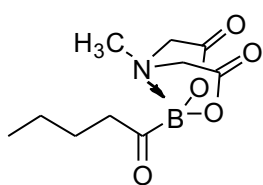

White solid; 70% yield.

$R_f$  (EtOAc) = 0.42.

$^1\text{H}$  NMR (400 MHz,  $\text{CD}_3\text{CN}$ )  $\delta$  4.03 (d,  $J$  = 16.9 Hz, 2H), 3.89 (d,  $J$  = 16.9 Hz, 2H), 2.81 (s, 3H), 2.65 – 2.60 (m, 2H), 1.51 – 1.43 (m, 2H), 1.33 – 1.22 (m, 2H), 0.89 (t,  $J$  = 7.3 Hz, 3H).

$^{13}\text{C}$  NMR (100 MHz,  $\text{CD}_3\text{CN}$ )  $\delta$  169.1, 63.0, 47.2, 24.9, 23.1, 14.3.

$^{11}\text{B}$  NMR (128 MHz,  $\text{CD}_3\text{CN}$ )  $\delta$  4.27.

HRMS-ESI:  $m/z$   $[\text{M}+\text{H}]^+$  for  $\text{C}_{10}\text{H}_{17}\text{BNO}_5$ , calculated 242.1194; observed 242.1196.

Melting point: 112 – 114 °C.

### 2-(2-cyclopentylacetyl)-6-methyl-1,3,6,2-dioxazaborocane-4,8-dione (5g)

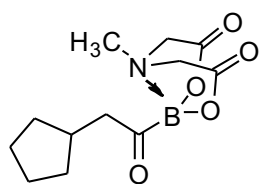

White solid; 40% yield.

$R_f$  (EtOAc) = 0.42.

$^1\text{H}$  NMR (400 MHz, DMSO)  $\delta$  4.31 (d,  $J$  = 17.1 Hz, 2H), 4.04 (d,  $J$  = 17.1 Hz, 2H), 2.78 (s, 3H), 2.63 (d,  $J$  = 6.9 Hz, 2H), 2.22 – 2.13 (m, 1H), 1.76 – 1.67 (m, 2H), 1.58 – 1.52 (m, 2H), 1.50 – 1.43 (m, 2H), 1.06 – 0.95 (m,

2H).

$^{13}\text{C}$  NMR (100 MHz,  $\text{CD}_3\text{CN}$ )  $\delta$  169.1, 63.0, 54.0, 47.4, 34.8, 33.3, 25.6.

$^{11}\text{B}$  NMR (128 MHz,  $\text{CD}_3\text{CN}$ )  $\delta$  4.19.

HRMS-ESI:  $m/z$   $[\text{M}+\text{Na}]^+$  for  $\text{C}_{12}\text{H}_{18}\text{BNO}_5\text{Na}$ , calculated 290.1171; observed 290.1173.

Melting point: 157 – 158  $^\circ\text{C}$ .

### 2-(2-cyclohexylacetyl)-6-methyl-1,3,6,2-dioxazaborocane-4,8-dione (5h)

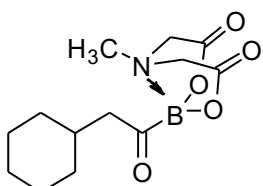

White solid; 48% yield.

$R_f$  (EtOAc) = 0.42.

$^1\text{H}$  NMR (400 MHz,  $\text{CD}_3\text{CN}$ )  $\delta$  4.01 (d,  $J$  = 16.9 Hz, 2H), 3.88 (d,  $J$  = 15.8 Hz, 2H), 2.80 (s, 3H), 2.50 (d,  $J$  = 7.8 Hz, 2H), 1.86 (s, 1H), 1.70 – 1.54 (m, 5H), 1.33 – 1.11 (m, 3H), 0.98 – 0.86 (m, 2H).

$^{13}\text{C}$  NMR (100 MHz,  $\text{CD}_3\text{CN}$ )  $\delta$  169.1, 63.0, 55.2, 47.4, 34.0, 33.0, 26.9.

$^{11}\text{B}$  NMR (128 MHz,  $\text{CD}_3\text{CN}$ )  $\delta$  4.15.

HRMS-ESI:  $m/z$   $[\text{M}+\text{Na}]^+$  for  $\text{C}_{13}\text{H}_{20}\text{BNO}_5\text{Na}$ , calculated 304.1327; observed 304.1322.

Melting point: > 250  $^\circ\text{C}$ .

### 2-(2-cyclopropylacetyl)-6-methyl-1,3,6,2-dioxazaborocane-4,8-dione (5i)

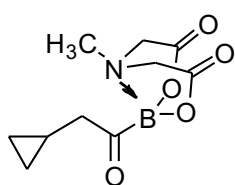

Sticky liquid; 83% yield.

$R_f$  (EtOAc) = 0.42.

$^1\text{H}$  NMR (400 MHz,  $\text{CD}_3\text{CN}$ )  $\delta$  4.08 – 4.01 (m, 2H), 3.94 – 3.87 (m, 2H), 2.82 (s, 3H), 2.52 (d,  $J$  = 6.6 Hz, 2H), 0.97 – 0.89 (m, 1H), 0.45 (d,  $J$  = 7.5 Hz, 2H), 0.05 (d,  $J$  = 4.4 Hz, 2H).

$^{13}\text{C}$  NMR (100 MHz,  $\text{CD}_3\text{CN}$ )  $\delta$  169.4, 63.2, 52.7, 47.6, 5.6, 4.7.

$^{11}\text{B}$  NMR (128 MHz,  $\text{CD}_3\text{CN}$ )  $\delta$  4.20.

HRMS-ESI:  $m/z$   $[\text{M}+\text{Na}]^+$  for  $\text{C}_{10}\text{H}_{14}\text{BNO}_5\text{Na}$ , calculated 262.0858; observed 262.0854.

### 6-methyl-2-(2-(thiophen-3-yl)acetyl)-1,3,6,2-dioxazaborocane-4,8-dione (5j)

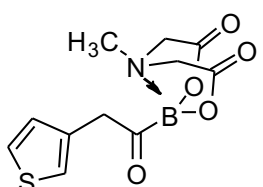

Sticky solid; 50% yield.

$R_f$  (EtOAc) = 0.46.

$^1\text{H}$  NMR (400 MHz,  $\text{CD}_3\text{CN}$ )  $\delta$  7.40 – 7.30 (m, 1H), 7.11 (s, 1H), 6.98 – 6.91 (m, 1H), 4.10 – 3.95 (m, 4H), 3.87 (s, 1H), 3.83 (s, 1H), 2.75 (s, 3H).

$^{13}\text{C}$  NMR (100 MHz,  $\text{CD}_3\text{CN}$ )  $\delta$  169.0, 134.8, 130.4, 126.3, 124.0, 63.0,

47.5.

$^{11}\text{B}$  NMR (128 MHz,  $\text{CD}_3\text{CN}$ )  $\delta$  4.49.

HRMS-ESI:  $m/z$   $[M+Na]^+$  for  $C_{11}H_{12}BNO_5Na$ , calculated 304.0422; observed 304.0421.

### 2-(3-methoxypropanoyl)-6-methyl-1,3,6,2-dioxazaborocane-4,8-dione (5k)

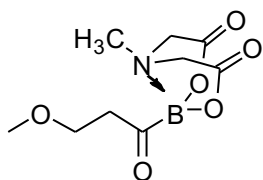

Sticky solid; 40% yield.

$R_f$  (EtOAc) = 0.40.

$^1H$  NMR (400 MHz,  $CD_3CN$ )  $\delta$  4.02 (d,  $J$  = 17.0 Hz, 2H), 3.88 (d,  $J$  = 16.9 Hz, 2H), 3.62 (t,  $J$  = 6.1 Hz, 2H), 3.23 (s, 3H), 2.83 (d,  $J$  = 6.2 Hz, 2H), 2.80 (s, 3H).

$^{13}C$  NMR (100 MHz,  $CD_3CN$ )  $\delta$  169.1, 67.6, 63.1, 58.7, 47.6, 47.2.

$^{11}B$  NMR (128 MHz,  $CD_3CN$ )  $\delta$  6.65.

HRMS-ESI:  $m/z$   $[M+Na]^+$  for  $C_9H_{14}BNO_6Na$ , calculated 266.0807; observed 266.0805.

### 6-methyl-2-octanoyl-1,3,6,2-dioxazaborocane-4,8-dione (5l)

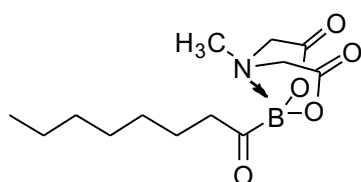

Sticky solid; 59% yield.

$R_f$  (EtOAc) = 0.42.

$^1H$  NMR (400 MHz,  $CD_3CN$ )  $\delta$  4.02 (d,  $J$  = 16.9 Hz, 2H), 3.88 (d,  $J$  = 16.9 Hz, 2H), 2.80 (s, 3H), 2.62 (t,  $J$  = 7.2 Hz, 2H), 1.53 – 1.45 (m, 2H), 1.27 (br s, 8H), 0.88 (t,  $J$  = 6.8 Hz, 3H).

$^{13}C$  NMR (100 MHz,  $CD_3CN$ )  $\delta$  169.1, 63.0, 47.4, 32.5, 30.0, 29.9, 23.3, 22.8, 14.4.

$^{11}B$  NMR (128 MHz,  $CD_3CN$ )  $\delta$  4.29.

HRMS-ESI:  $m/z$   $[M+Na]^+$  for  $C_{13}H_{22}BNO_5Na$ , calculated 306.1484; observed 306.1489.

### 2-(3-cyclohexylpropanoyl)-6-methyl-1,3,6,2-dioxazaborocane-4,8-dione (5m)

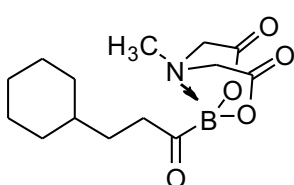

White solid; 55% yield.

$R_f$  (EtOAc) = 0.42.

$^1H$  NMR (400 MHz,  $CD_3CN$ )  $\delta$  4.45 (d,  $J$  = 17.0 Hz, 2H), 4.31 (d,  $J$  = 17.0 Hz, 2H), 3.23 (s, 3H), 3.05 (t,  $J$  = 7.4 Hz, 2H), 2.15 – 2.02 (m, 5H), 1.80 (q,  $J$  = 7.1 Hz, 2H), 1.67 – 1.53 (m, 4H), 1.35 – 1.25 (m, 2H).

$^{13}C$  NMR (100 MHz,  $CD_3CN$ )  $\delta$  169.1, 63.0, 47.3, 45.0, 38.1, 33.9, 30.1, 27.3, 27.0.

$^{11}B$  NMR (128 MHz,  $CD_3CN$ )  $\delta$  6.78.

HRMS-ESI:  $m/z$   $[M+Na]^+$  for  $C_{14}H_{22}BNO_5Na$ , calculated 318.1484; observed 318.1487.

Melting point: > 250 °C.

### 2-(6-chlorohexanoyl)-6-methyl-1,3,6,2-dioxazaborocane-4,8-dione (5n)

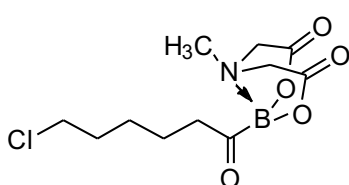

White solid; 58% yield.

$R_f$  (EtOAc) = 0.42.

$^1H$  NMR (400 MHz,  $CD_3CN$ )  $\delta$  4.07 – 3.82 (m, 4H), 3.57 (t,  $J$  = 6.6 Hz, 2H), 2.80 (s, 3H), 2.65 (t,  $J$  = 7.2 Hz, 2H), 1.79 – 1.70 (m, 2H), 1.56 – 1.46 (m, 2H), 1.43 – 1.33 (m, 2H).

$^{13}C$  NMR (100 MHz,  $CD_3CN$ )  $\delta$  169.1, 63.0, 47.4, 46.1, 33.3, 27.2, 22.0.



$^{11}\text{B}$  NMR (128 MHz,  $\text{CD}_3\text{CN}$ )  $\delta$  4.28.

HRMS-ESI:  $m/z$   $[\text{M}+\text{H}]^+$  for  $\text{C}_{11}\text{H}_{18}\text{BCINO}_5$ , calculated 290.0963; observed 290.0976.

Melting point: 140 – 148  $^\circ\text{C}$ .

#### Methyl 6-(6-methyl-4,8-dioxo-1,3,6,2-dioxazaborocan-2-yl)-6-oxohexanoate (5o)

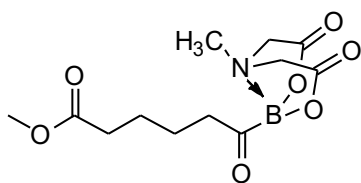

White solid; 50% yield.

$R_f$  (EtOAc) = 0.45.

$^1\text{H}$  NMR (400 MHz,  $\text{CD}_3\text{CN}$ )  $\delta$  4.08 – 3.73 (m, 4H), 3.60 (s, 3H), 2.80 (s, 3H), 2.65 (m, 2H), 2.29 (t,  $J$  = 6.8 Hz, 2H), 1.61 – 1.43 (m, 4H).

$^{13}\text{C}$  NMR (100 MHz,  $\text{CD}_3\text{CN}$ )  $\delta$  174.7, 169.1, 63.0, 51.9, 47.4, 34.4, 25.3, 22.2.

$^{11}\text{B}$  NMR (128 MHz,  $\text{CD}_3\text{CN}$ )  $\delta$  4.27.

HRMS-ESI:  $m/z$   $[\text{M}+\text{H}]^+$  for  $\text{C}_{12}\text{H}_{19}\text{BNO}_7$ , calculated 300.1249; observed 300.1245.

Melting point: 155 – 158  $^\circ\text{C}$ .

#### 2-(hept-6-ynoyl)-6-methyl-1,3,6,2-dioxazaborocane-4,8-dione (5p)

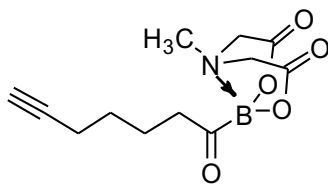

White solid; 60% yield.

$R_f$  (EtOAc) = 0.5.

$^1\text{H}$  NMR (400 MHz,  $\text{CD}_3\text{CN}$ )  $\delta$  4.03 (d,  $J$  = 16.9 Hz, 2H), 3.89 (d,  $J$  = 16.9 Hz, 2H), 2.81 (s, 3H), 2.66 (t,  $J$  = 6.7 Hz, 2H), 2.20 – 2.12 (m, 3H), 1.62 – 1.54 (m, 2H), 1.51 – 1.42 (m, 2H).

$^{13}\text{C}$  NMR (100 MHz,  $\text{CD}_3\text{CN}$ )  $\delta$  169.0, 85.3, 69.7, 63.0, 47.4, 46.8, 28.8, 21.9, 18.7.

$^{11}\text{B}$  NMR (128 MHz,  $\text{CD}_3\text{CN}$ )  $\delta$  4.29.

HRMS-ESI:  $m/z$   $[\text{M}+\text{H}]^+$  for  $\text{C}_{12}\text{H}_{17}\text{BNO}_5$ , calculated 266.1195; observed 266.1200.

Melting point: 146 – 148  $^\circ\text{C}$ .

#### 2-(but-2-enoyl)-6-methyl-1,3,6,2-dioxazaborocane-4,8-dione (5q)

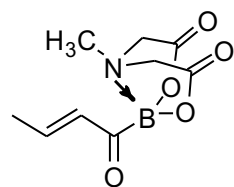

Yellow crystalline solid; 45% yield.

$R_f$  (EtOAc) = 0.5.

$^1\text{H}$  NMR (400 MHz,  $\text{CD}_3\text{CN}$ )  $\delta$  7.17 – 7.05 (m, 1H), 6.30 (d,  $J$  = 15.9 Hz, 1H), 4.00 (d,  $J$  = 16.7 Hz, 2H), 3.88 (d,  $J$  = 16.7 Hz, 2H), 2.80 (s, 3H), 1.88 (d,  $J$  = 6.7 Hz, 3H).

$^{13}\text{C}$  NMR (100 MHz,  $\text{CD}_3\text{CN}$ )  $\delta$  169.1, 146.5, 137.5, 62.8, 47.3, 19.0.

$^{11}\text{B}$  NMR (128 MHz,  $\text{CD}_3\text{CN}$ )  $\delta$  4.91.

HRMS-ESI:  $m/z$   $[\text{M}+\text{H}]^+$  for  $\text{C}_9\text{H}_{13}\text{BNO}_5$ , calculated 226.0882; observed 226.0883.

Melting point: 133 – 135  $^\circ\text{C}$ .

**6-methyl-4,8-dioxo-1,3,6,2-dioxazaborocan-2-yl acetate (5s)<sup>18</sup>**

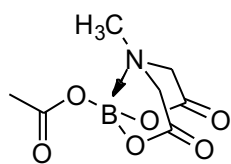

White solid; 44% yield.

$R_f$  (Acetonitrile: EtOAc = 2: 8) = 0.6.

$^1\text{H}$  NMR (400 MHz,  $\text{CD}_3\text{CN}$ )  $\delta$  4.15 – 3.92 (m, 4H), 2.90 (s, 3H), 2.08 (s, 3H).

$^{13}\text{C}$  NMR (100 MHz,  $\text{CD}_3\text{CN}$ )  $\delta$  173.4, 168.2, 64.6, 46.8, 22.8.

$^{11}\text{B}$  NMR (128 MHz,  $\text{CD}_3\text{CN}$ )  $\delta$  8.33.

HRMS-ESI:  $m/z$   $[\text{M}+\text{H}]^+$  for  $\text{C}_7\text{H}_{11}\text{BNO}_6$ , calculated 216.0675; observed 216.0679.

Melting point: 156 – 159 °C.

## 5. X-ray Experiment

### Molecular structure of **5m**

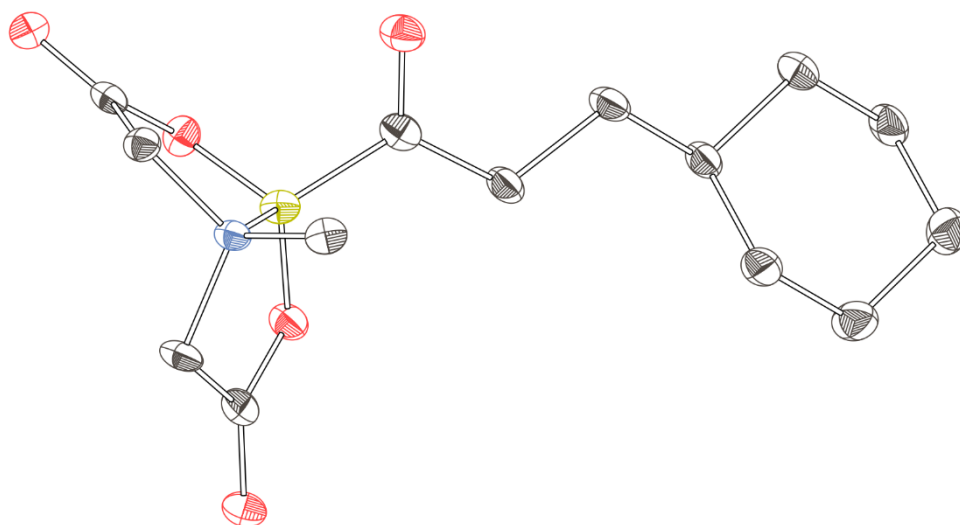

**Figure S1.** Molecular structure of **5m**.<sup>19</sup> One of the three independent molecules is shown.

An EtOAc solution of **5m** was diluted with Et<sub>2</sub>O by vapor diffusion to afford a mass of colorless needles. Most of the crystals were hairlike and unsuitable for diffraction but a few (identified under a polarizing microscope) were slightly larger. A suitable fragment (.33 x .04 x .01 mm) was separated carefully, mounted on a glass fiber with Paratone oil, and cooled to 100 K on the diffractometer. The crystal system was tentatively assigned as monoclinic and complete data in 2/m were collected to 0.83 Å. 29418 reflections were collected (8883 unique, 5897 observed) with R(int) 7.5% and R(sigma) 8.0% after Gaussian absorption and beam profile correction (largest correction factor 1.4).

The space group was assigned as P21/c based on the systematic absences. The structure solved readily in ShelXT with 3 molecules in the asymmetric unit. All non-H atoms were located in Fourier maps and refined anisotropically with no restraints. C-H hydrogens were placed in calculated positions and refined with riding coordinates and ADPs.

The final refinement (8883 data, 0 restraints, 571 parameters) converged with R1 ( $F_o > 4\sigma(F_o)$ ) = 5.1%, wR<sub>2</sub> = 12.0%, S = 1.03. The largest Fourier features were 0.26 and -0.29 e<sup>-</sup> Å<sup>-3</sup>.

### Crystal Data

| Compound                                         | 5m                                               |
|--------------------------------------------------|--------------------------------------------------|
| <b>Formula</b>                                   | C <sub>14</sub> H <sub>22</sub> BNO <sub>5</sub> |
| <b>MW</b>                                        | 295.13                                           |
| <b>Space group</b>                               | P2 <sub>1</sub> /c                               |
| <b>a (Å)</b>                                     | 24.3090(11)                                      |
| <b>b (Å)</b>                                     | 6.3645(2)                                        |
| <b>c (Å)</b>                                     | 31.2582(14)                                      |
| <b>α (°)</b>                                     | 90                                               |
| <b>β (°)</b>                                     | 110.597(5)                                       |
| <b>γ (°)</b>                                     | 90                                               |
| <b>V (Å<sup>3</sup>)</b>                         | 4527.0(4)                                        |
| <b>Z</b>                                         | 12                                               |
| <b>ρ<sub>calc</sub> (g cm<sup>-3</sup>)</b>      | 1.299                                            |
|                                                  |                                                  |
| <b>T (K)</b>                                     | 100                                              |
| <b>λ (Å)</b>                                     | 1.54184                                          |
| <b>2θ<sub>min</sub>, 2θ<sub>max</sub></b>        | 8, 146                                           |
| <b>Nref</b>                                      | 29418                                            |
| <b>R(int), R(σ)</b>                              | .0748, .0796                                     |
| <b>μ(mm<sup>-1</sup>)</b>                        | 0.797                                            |
| <b>Size (mm)</b>                                 | .33 x .04 x .01                                  |
| <b>T<sub>max</sub>/T<sub>min</sub></b>           | 1.40                                             |
|                                                  |                                                  |
| <b>Data</b>                                      | 8883                                             |
| <b>Restraints</b>                                | 0                                                |
| <b>Parameters</b>                                | 571                                              |
| <b>R<sub>1</sub>(obs)</b>                        | 0.0510                                           |
| <b>wR<sub>2</sub>(all)</b>                       | 0.1203                                           |
| <b>S</b>                                         | 1.029                                            |
| <b>Peak, hole (e<sup>-</sup> Å<sup>-3</sup>)</b> | 0.26, -0.29                                      |

**Molecular structure of 5q**

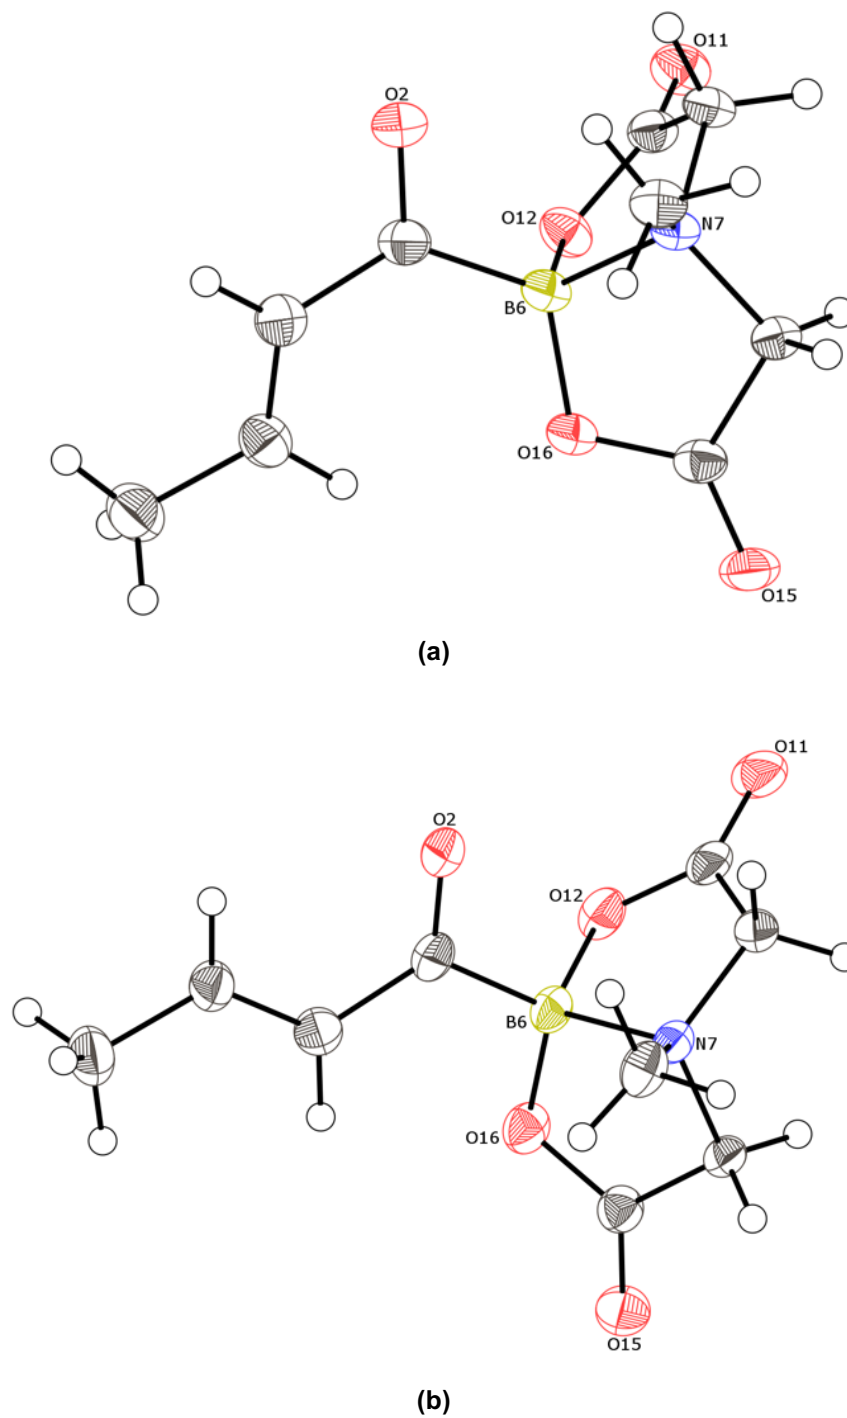

**Figure S2.** Molecular structure of 5q.<sup>19</sup> (a) *s-trans* isomer; (b) *s-cis* isomer (the 10% *s-trans* isomer)

has been omitted for better clarity.

An EtOAc solution of **5q** was diluted with Et<sub>2</sub>O by vapor diffusion to afford a mass of colorless needles. An irregular fragment (.30 x .18 x .16 mm) was separated, mounted with Paratone oil on a glass fiber, and cooled to 100 K on the diffractometer. Complete data were collected to 0.8 Å resolution. 11143 reflections were collected (4233 unique, 3853 observed) with R(int) 3.8% and R(sigma) 3.9% after Gaussian absorption and beam profile correction (largest correction factor 2.0).

The structure was triclinic and solved readily in P-1 using ShelXT with all non-H atoms located in the initial solution. There were two molecules in the asymmetric unit. The C(O)C<sub>3</sub>H<sub>5</sub> moiety in one of the two independent molecules was disordered in a 9:1 ratio by rotation around the C(sp<sup>2</sup>)-C(sp<sup>2</sup>) bond, i.e. a 9:1 mixture of s-cis and s-trans isomers. The other independent molecule was exclusively s-trans. Except for the 10% occupied part of this disorder, all non-H atoms were freely refined with anisotropic ADPs. The minor part of the disordered group was refined with isotropic ADPs that were restrained by a short-range SIMU instruction. All H atoms were placed in calculated positions and refined with riding coordinates and ADPs.

The final refinement (4233 data, 43 restraints, 315 parameters) converged with R1 ( $F_o > 4\sigma(F_o)$ ) = 4.2%, wR<sub>2</sub> = 11.9%, S = 1.03. The largest Fourier features were 0.34 and -0.24 e<sup>-</sup> Å<sup>-3</sup>.

| <b>Compound</b>                                      | <b>5q</b>                                       |
|------------------------------------------------------|-------------------------------------------------|
| <b>Formula</b>                                       | C <sub>9</sub> H <sub>12</sub> BNO <sub>5</sub> |
| <b>MW</b>                                            | 225.01                                          |
| <b>Space group</b>                                   | P-1                                             |
| <b>a (Å)</b>                                         | 10.3672(3)                                      |
| <b>b (Å)</b>                                         | 10.8231(3)                                      |
| <b>c (Å)</b>                                         | 10.9398(4)                                      |
| <b>α (°)</b>                                         | 78.441(3)                                       |
| <b>β (°)</b>                                         | 85.514(3)                                       |
| <b>γ (°)</b>                                         | 63.232(3)                                       |
| <b>V (Å<sup>3</sup>)</b>                             | 1073.63(6)                                      |
| <b>Z</b>                                             | 4                                               |
| <b>ρ<sub>calc</sub> (g cm<sup>-3</sup>)</b>          | 1.392                                           |
| <b>T (K)</b>                                         | 100                                             |
| <b>λ (Å)</b>                                         | 1.54184                                         |
| <b>2θ<sub>min</sub>, 2θ<sub>max</sub></b>            | 8, 146                                          |
| <b>N<sub>ref</sub></b>                               | 11143                                           |
| <b>R(int), R(σ)</b>                                  | .0379, .0390                                    |
| <b>μ(mm<sup>-1</sup>)</b>                            | 0.951                                           |
| <b>Size (mm)</b>                                     | .30 x .18 x .16                                 |
| <b>T<sub>max</sub> / T<sub>min</sub></b>             | 2.02                                            |
| <b>Data</b>                                          | 4233                                            |
| <b>Restraints</b>                                    | 43                                              |
| <b>Parameters</b>                                    | 315                                             |
| <b>R<sub>1</sub>(obs)</b>                            | 0.0423                                          |
| <b>wR<sub>2</sub>(all)</b>                           | 0.1190                                          |
| <b>S</b>                                             | 1.027                                           |
| <b>Peak, hole<br/>(e<sup>-</sup> Å<sup>-3</sup>)</b> | 0.34, -0.24                                     |

### Molecular structure of **5s**

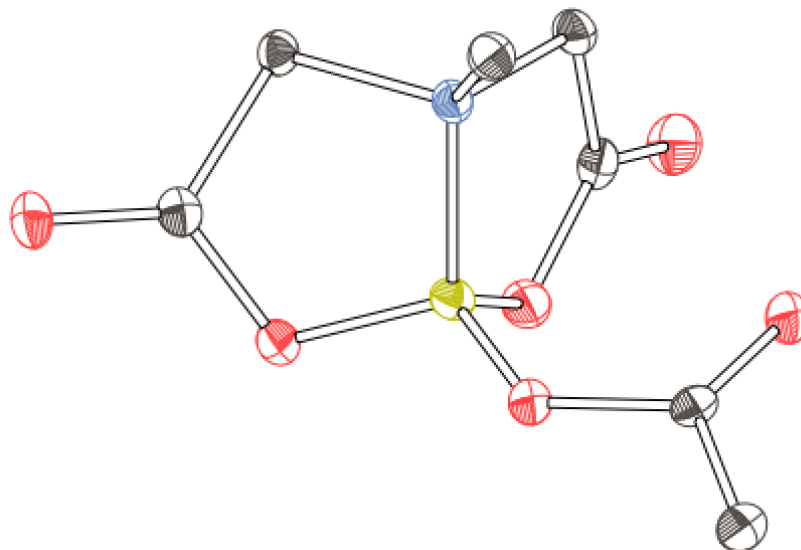

**Figure S3.** Molecular structure of **5s**.<sup>19</sup>

An EtOAc solution of **5s** was diluted with Et<sub>2</sub>O by vapor diffusion to afford colorless, flat prisms. A small natural crystal (.40 x .06 x .03 mm) was separated carefully, mounted with STP oil treatment, and cooled to 100 K on the diffractometer. Complete data were collected to 0.815 Å. 10819 reflections were collected (3609 unique, 3155 observed) with R(int) 5.1% and R(sigma) 5.2% after Gaussian absorption and beam profile correction (maximum correction factor 1.43).

Using ShelXT, the structure solved readily in P2<sub>1</sub>/n with two molecules in the asymmetric unit. All non-H atoms were located in the initial solution and refined anisotropically with no restraints. C-H hydrogens were placed in calculated positions and refined with riding coordinates and ADPs.

The final refinement (3609 data, 0 restraints, 275 parameters) converged with R1 ( $F_o > 4\sigma(F_o)$ ) = 4.4%, wR<sub>2</sub> = 11.7%, S = 1.04. The largest Fourier features were 0.30 and -0.34 e<sup>-</sup> Å<sup>-3</sup>.



| <b>Compound</b>                                      | <b>5s</b>                                       |
|------------------------------------------------------|-------------------------------------------------|
| <b>Formula</b>                                       | C <sub>7</sub> H <sub>10</sub> BNO <sub>6</sub> |
| <b>MW</b>                                            | 214.97                                          |
| <b>Space group</b>                                   | P2 <sub>1</sub> /c                              |
| <b>a (Å)</b>                                         | 9.3307(3)                                       |
| <b>b (Å)</b>                                         | 21.4147(8)                                      |
| <b>c (Å)</b>                                         | 9.6557(4)                                       |
| <b>α (°)</b>                                         | 90                                              |
| <b>β (°)</b>                                         | 109.438(4)                                      |
| <b>γ (°)</b>                                         | 90                                              |
| <b>V (Å<sup>3</sup>)</b>                             | 1819.38(12)                                     |
| <b>Z</b>                                             | 8                                               |
| <b>ρ<sub>calc</sub> (g cm<sup>-3</sup>)</b>          | 1.57                                            |
| <b>T (K)</b>                                         | 100                                             |
| <b>λ (Å)</b>                                         | 1.54184                                         |
| <b>2θ<sub>min</sub>, 2θ<sub>max</sub></b>            | 8, 146                                          |
| <b>Nref</b>                                          | 10819                                           |
| <b>R(int), R(σ)</b>                                  | .0513, .0515                                    |
| <b>μ(mm<sup>-1</sup>)</b>                            | 1.176                                           |
| <b>Size (mm)</b>                                     | .40 x .06 x .03                                 |
| <b>T<sub>max</sub> / T<sub>min</sub></b>             | 1.43                                            |
| <b>Data</b>                                          | 3609                                            |
| <b>Restraints</b>                                    | 0                                               |
| <b>Parameters</b>                                    | 275                                             |
| <b>R<sub>1</sub>(obs)</b>                            | 0.0437                                          |
| <b>wR<sub>2</sub>(all)</b>                           | 0.1168                                          |
| <b>S</b>                                             | 1.035                                           |
| <b>Peak, hole<br/>(e<sup>-</sup> Å<sup>-3</sup>)</b> | 0.30, -0.34                                     |

## 6. References

- 1) E. Blanc, D. Schwarzenbach and H. D Flack, *J. Appl. Cryst.*, 1991, **24**, 1035.
- 2) Version 1.171.38.46 2015, Rigaku Oxford Diffraction.
- 3) G. M. Sheldrick, *Acta Cryst.*, 2015, **A71** 3.
- 4) G. M. Sheldrick, *Acta Cryst.*, 2015, **C71** 3.
- 5) O. V. Dolomanov, L. J. Bourhis, R. J. Gildea, J. A. K. Howard and H. Puschmann, *J. Appl. Cryst.*, 2009, **42**, 339.
- 6) Crystal Maker Software Ltd, Oxford, England ([www.crystallmaker.com](http://www.crystallmaker.com)).
- 7) S. Lee, D. Li and J. Yun, *Chem. Asian J.*, 2014, **9**, 2440.
- 8) Z. Q. Zhang, C. T. Yang, L. J. Liang, B. Xiao, X. Lu, J.H. Liu, Y. Y. Sun, T. B. Marder and Y. Fu, *Org. Lett.*, 2014, **16**, 6342.
- 9) G. Gao, J. Yan, K. Yang, F. Chen and Q. Song, *Green Chem.*, 2017, **19**, 3997.
- 10) K. Endo, M. Hirokami and T. Shibata, *Synlett.*, 2009, **8**, 1331.
- 11) C. E. Iacono, T. C. Stephens, T. S. Rajan and G. Pattison, *J. Am. Chem. Soc.*, 2018, **140**, 2036.
- 12) Z. Zuo and Z. Huang, *Org. Chem. Front.* 2016, **3**, 434.
- 13) J. Taguchi, T. Ikeda, R. Takahashi, I. Sasaki, Y. Ogasawara, T. Dairi, N. Kato, Y. Yamamoto, J. W. Bode and H. Ito, *Angew. Chem. Int. Ed.*, 2017, **56**, 13847.
- 14) M. L. Lepage, S. Lai, N. Peressin, R. Hadjerici, B. O. Patrick, D. M. Perrin, *Angew. Chem. Int. Ed.* 2017, **56**, 15257.
- 15) M. Tomoya, N. Junki, Z. Wang, S. Yota, G. S. Scott and M. Masahiro, *J. Am. Chem. Soc.*, 2017, **139**, 10903.
- 16) Z. He, P. Trinchera, S. Adachi, J. D. St. Denis and A. K. Yudin, *Angew. Chem. Int. Ed.*, 2012, **51**, 11092.
- 17) S. Adachi, A. B. Cogna, M. J. Niphakis, Z. He, A. Zajdlik, J. D. St. Denis, C. C. G. Scully, B. F. Cravatt and A. K. Yudin. *Chem. Commun.*, 2015, **51**, 3608.
- 18) C. F. Lee, D. B. Diaz, A. Holownia, S. J. Kaldas, S. K. Liew, G. E. Garrett, T. Dudding and A. K. Yudin, *Nat. Chem.*, 2018, **10**, 1062.
- 19) CCDC 1880524 (**5m**), 1880525 (**5q**) and 1900591 (**5s**) contain the supplementary crystallographic data for this paper. These data can be obtained free of charge from the Cambridge Crystallographic Data Center via [www.ccdc.cam.ac.uk](http://www.ccdc.cam.ac.uk)

## 7. NMR spectra

$^1\text{H}$  NMR, compound 2a

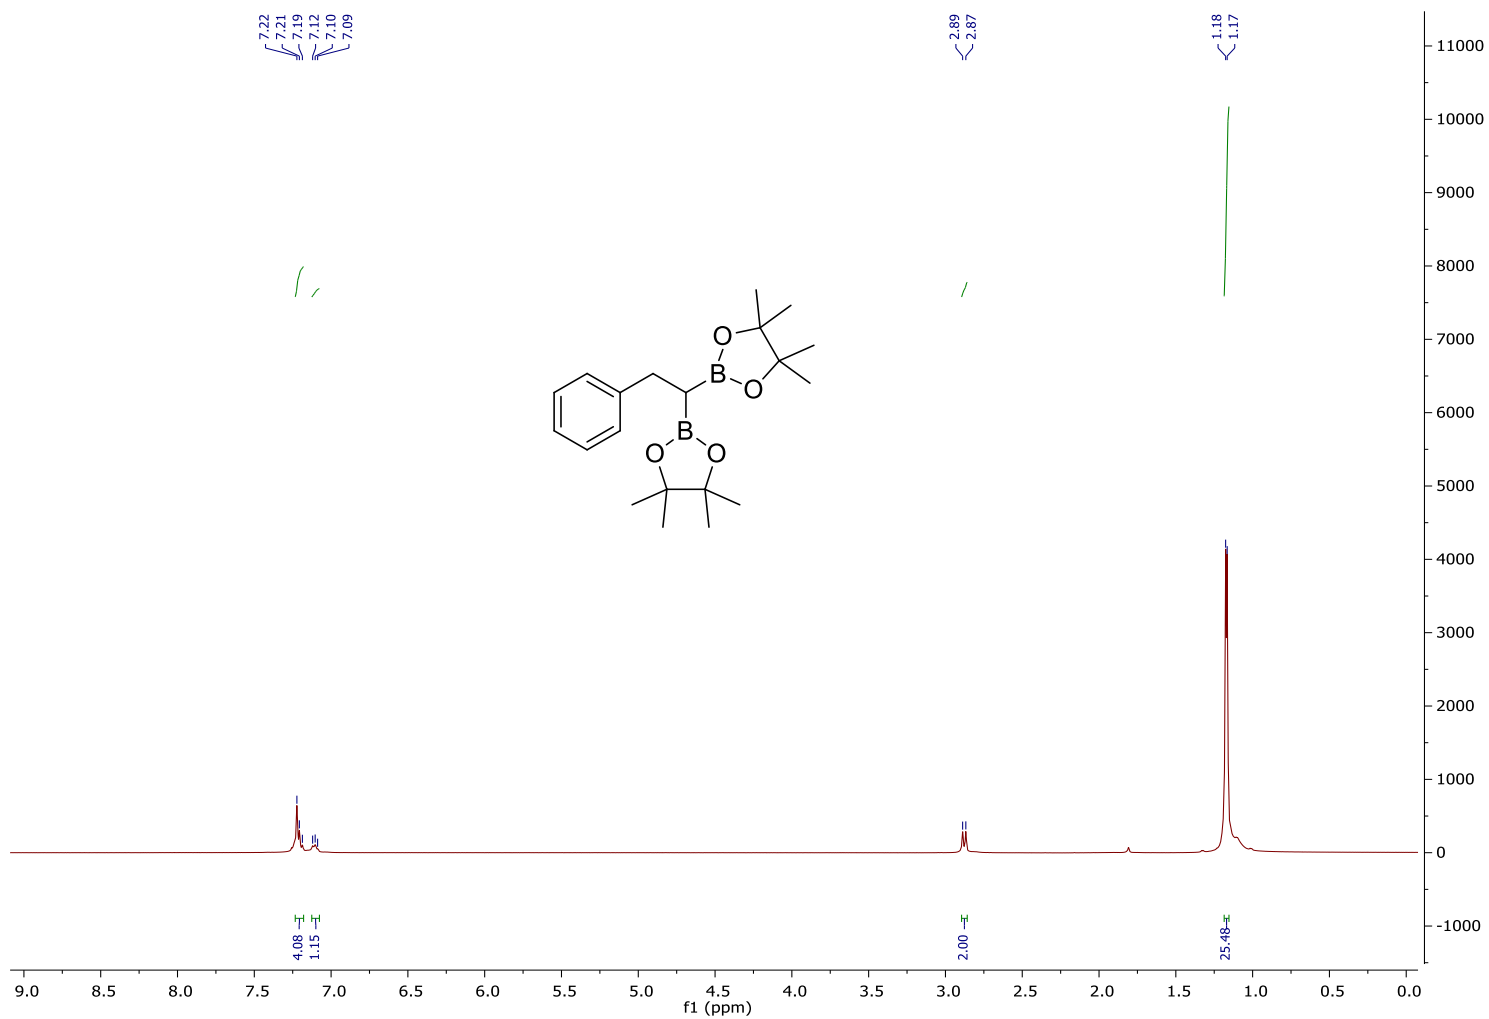

<sup>13</sup>C NMR, compound 2a

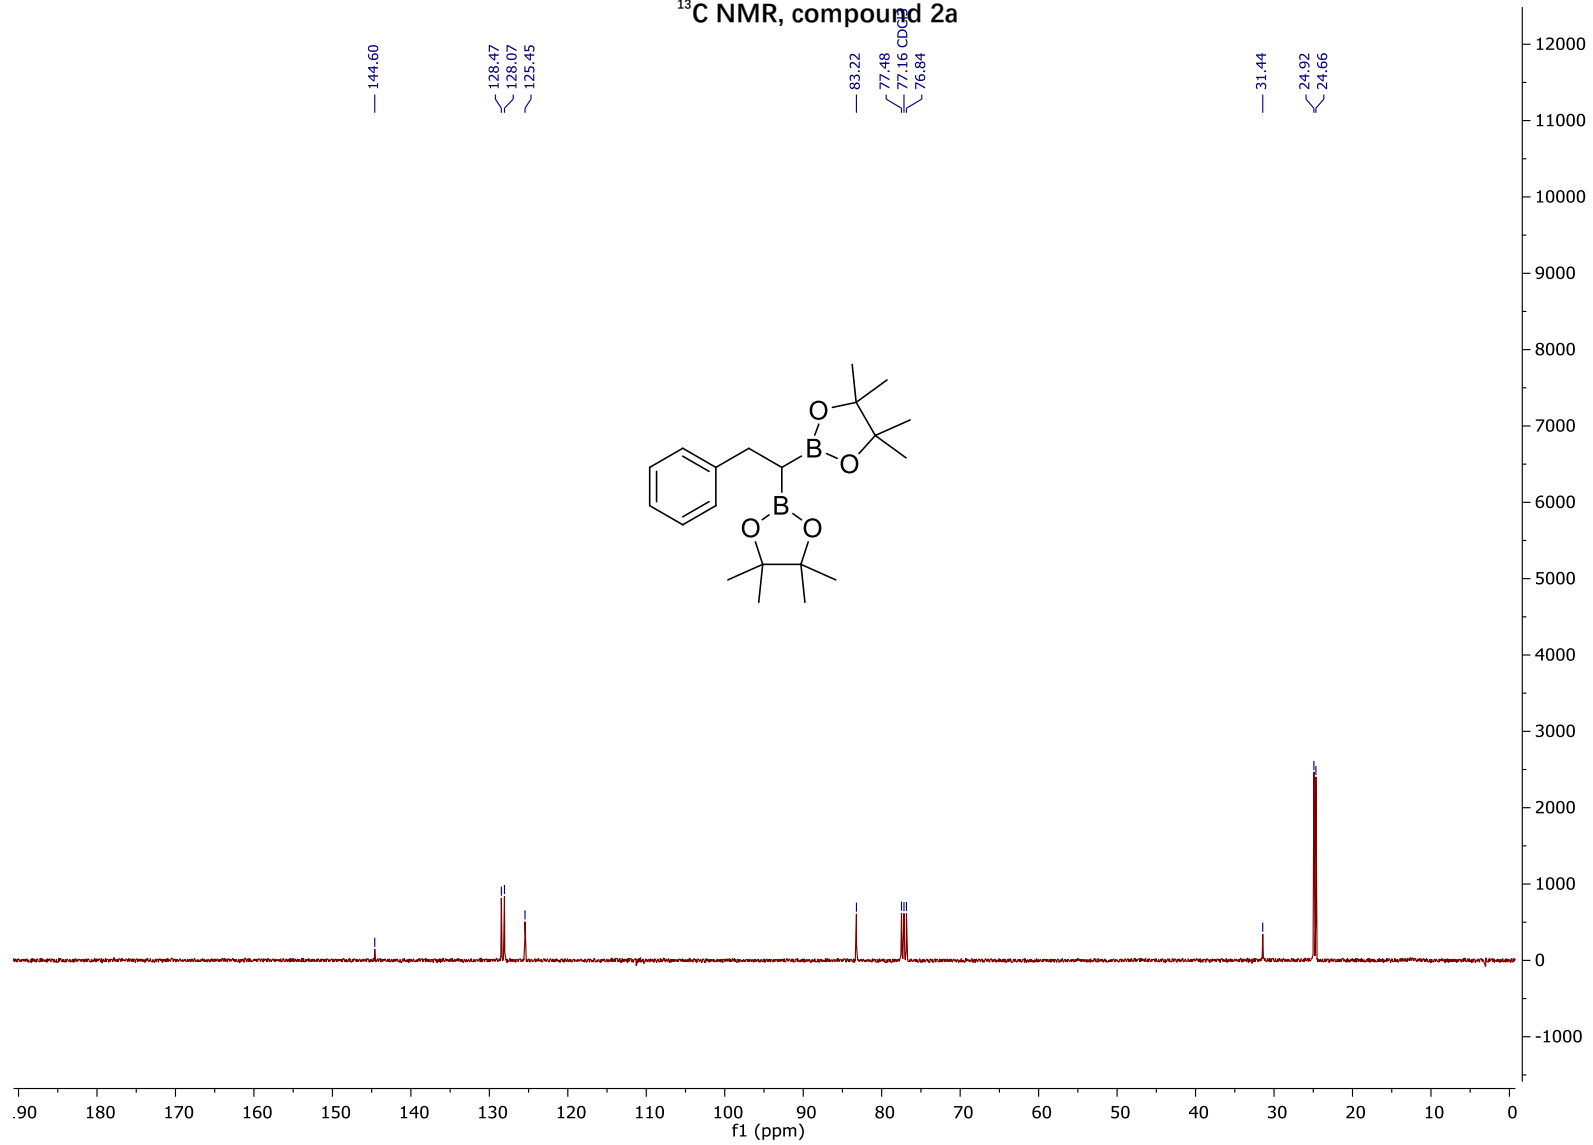

<sup>11</sup>B NMR, compound 2a

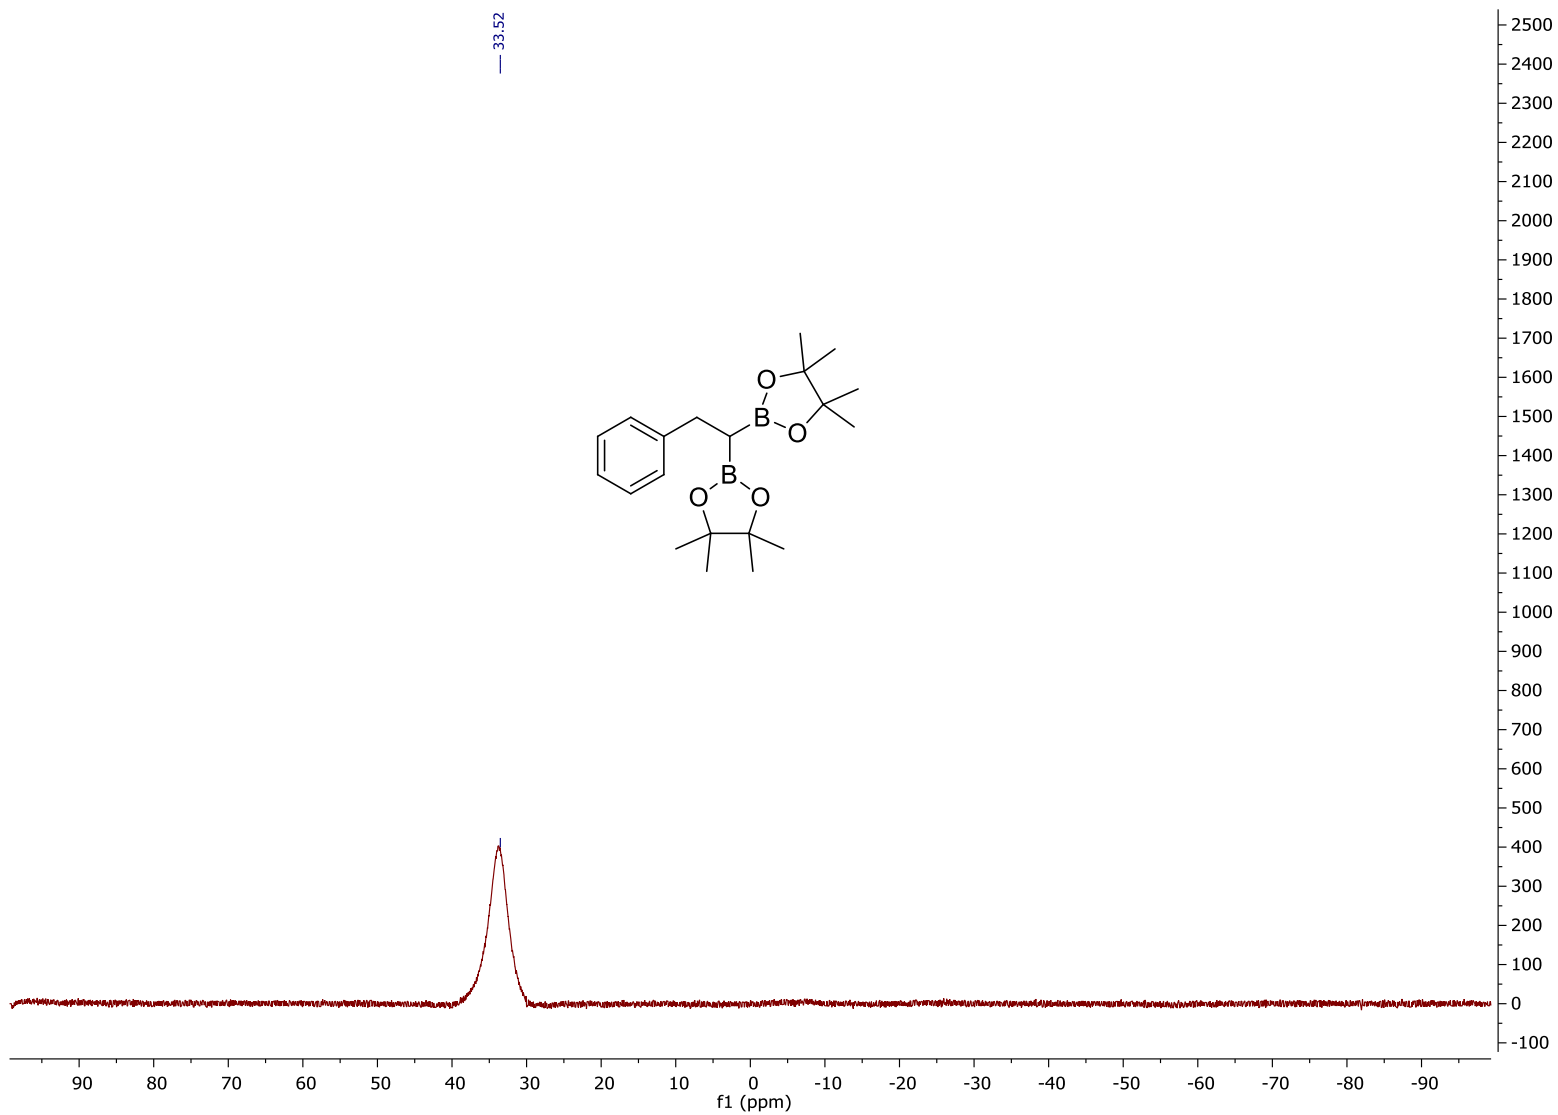

<sup>1</sup>H NMR, compound 2b

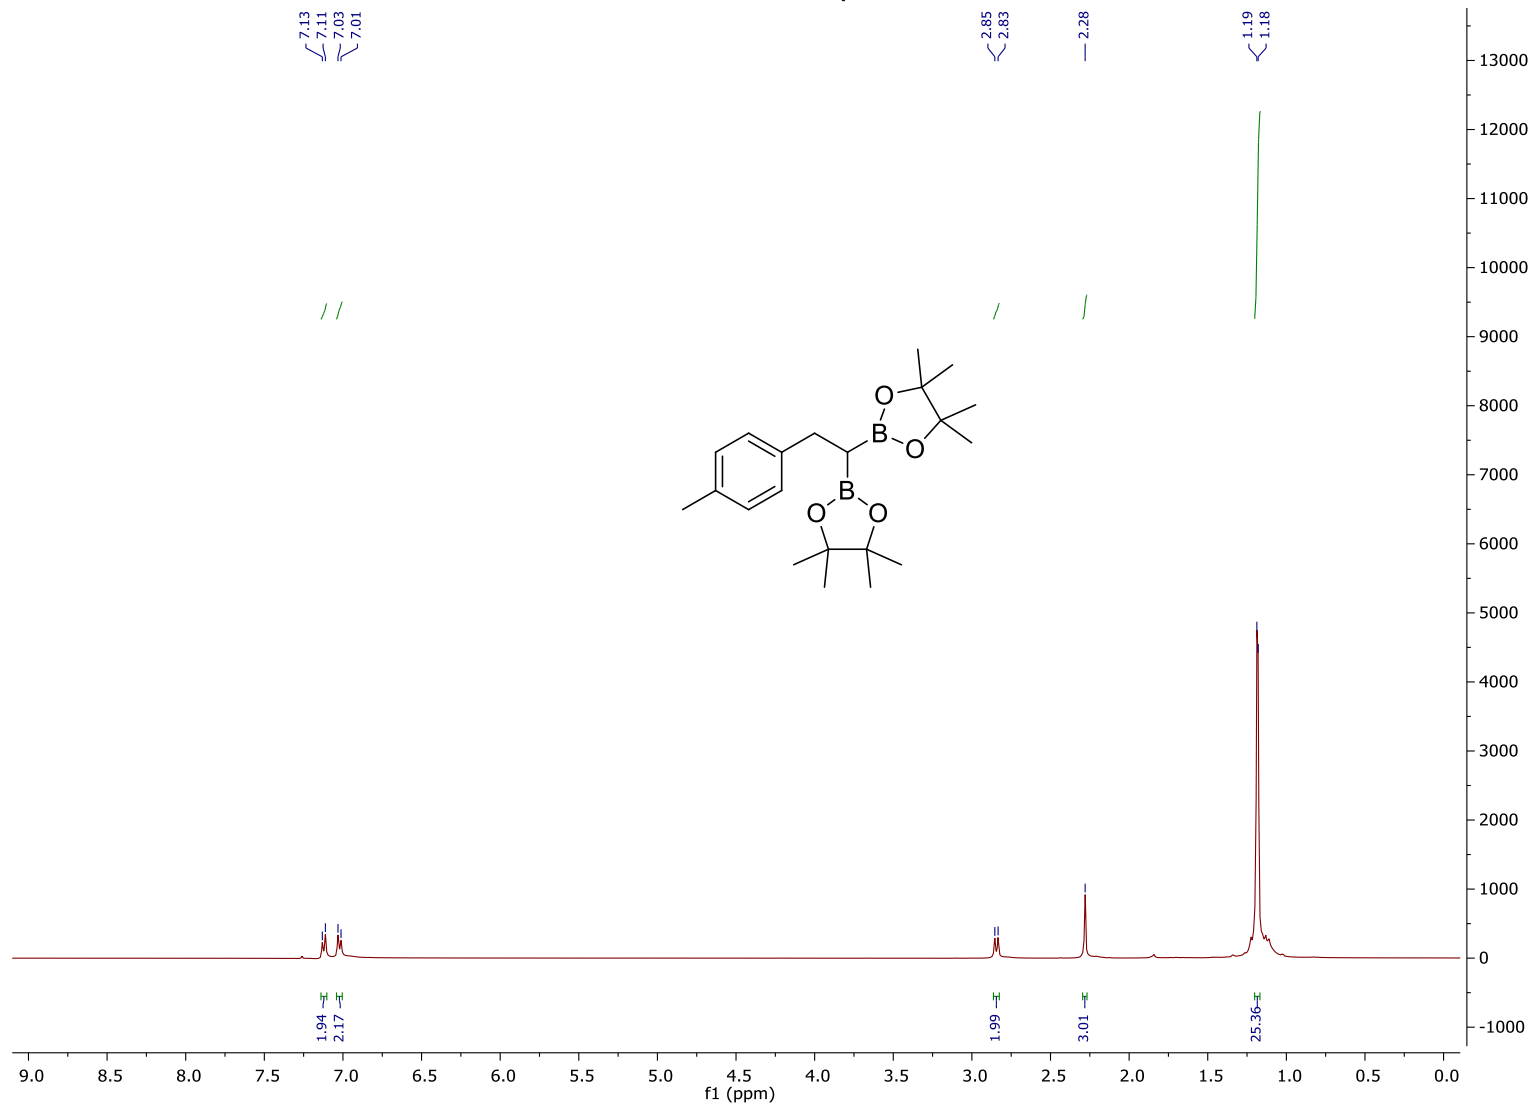

<sup>13</sup>C NMR, compound 2b

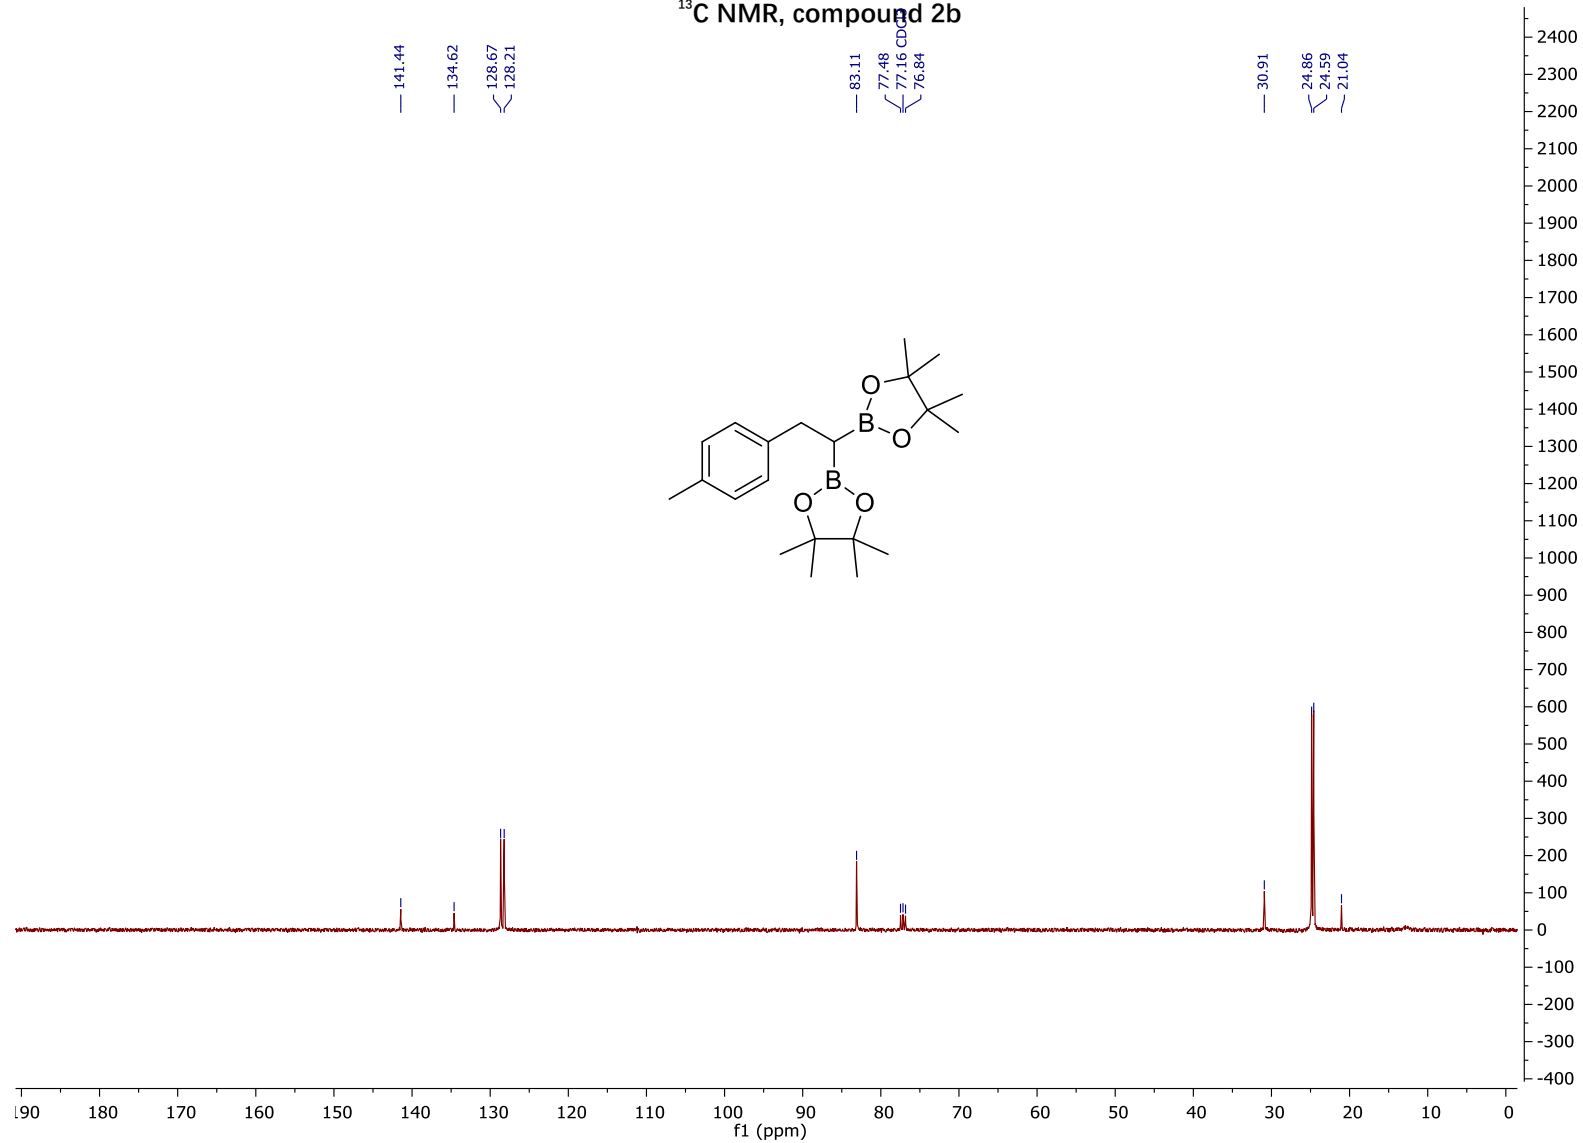

<sup>11</sup>B NMR, compound 2b

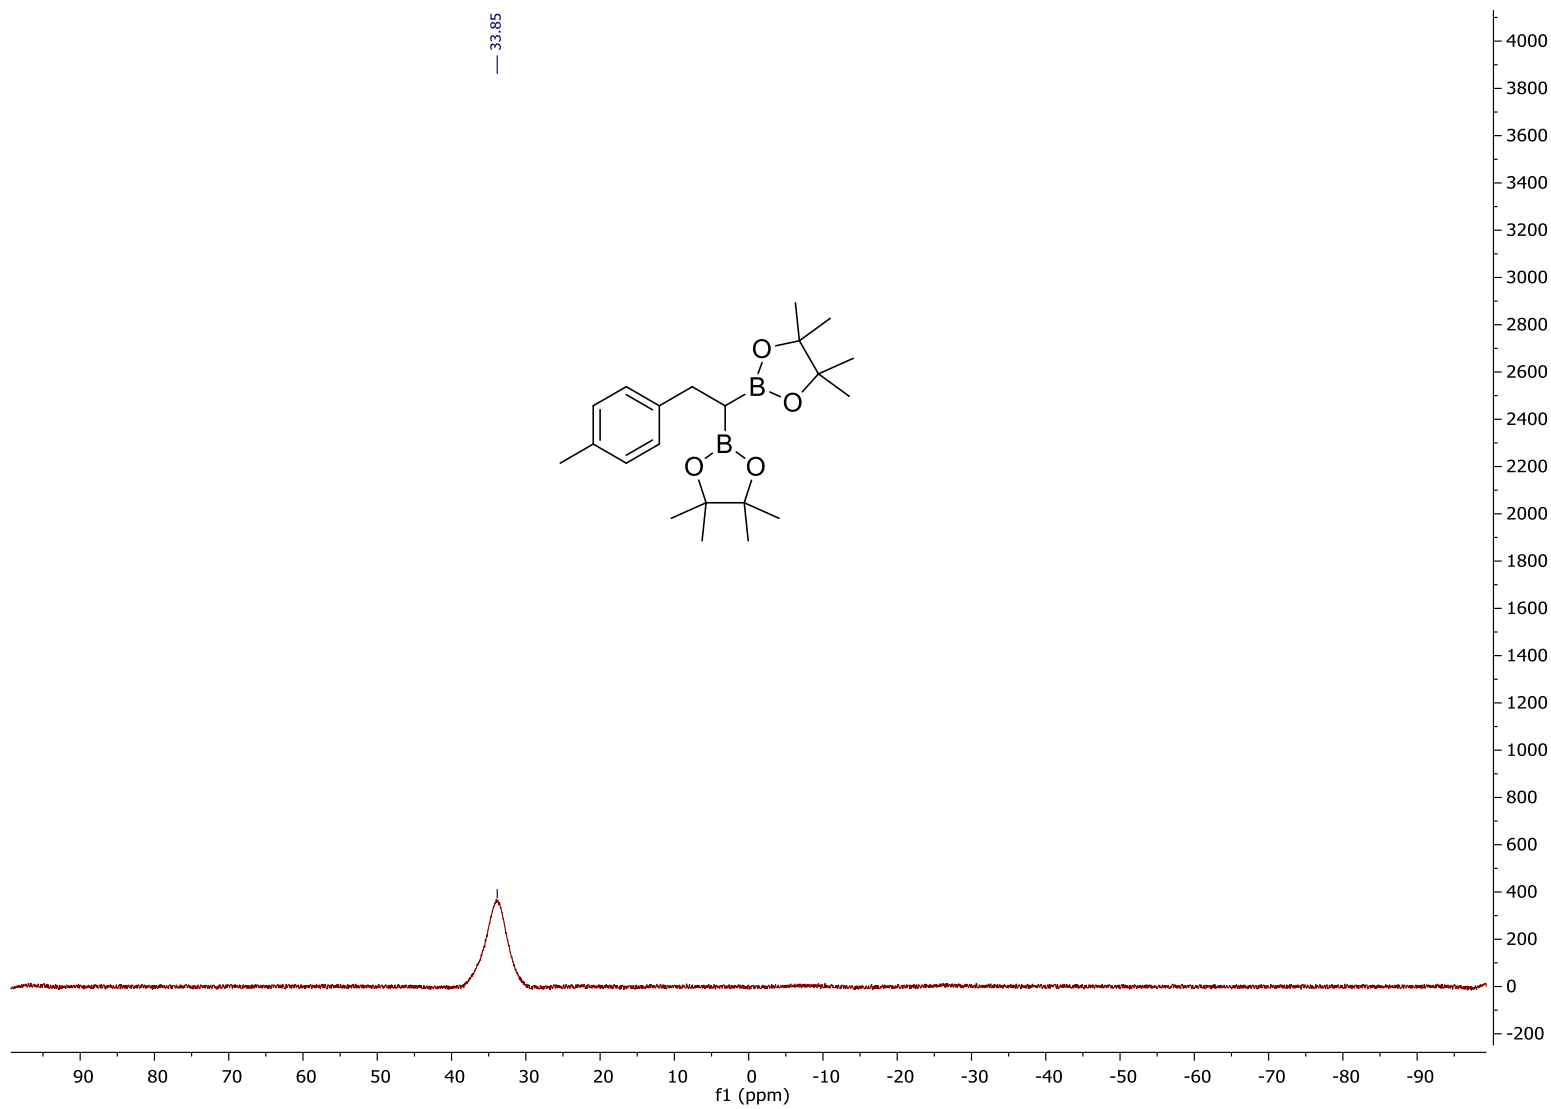



<sup>1</sup>H NMR, compound 2c

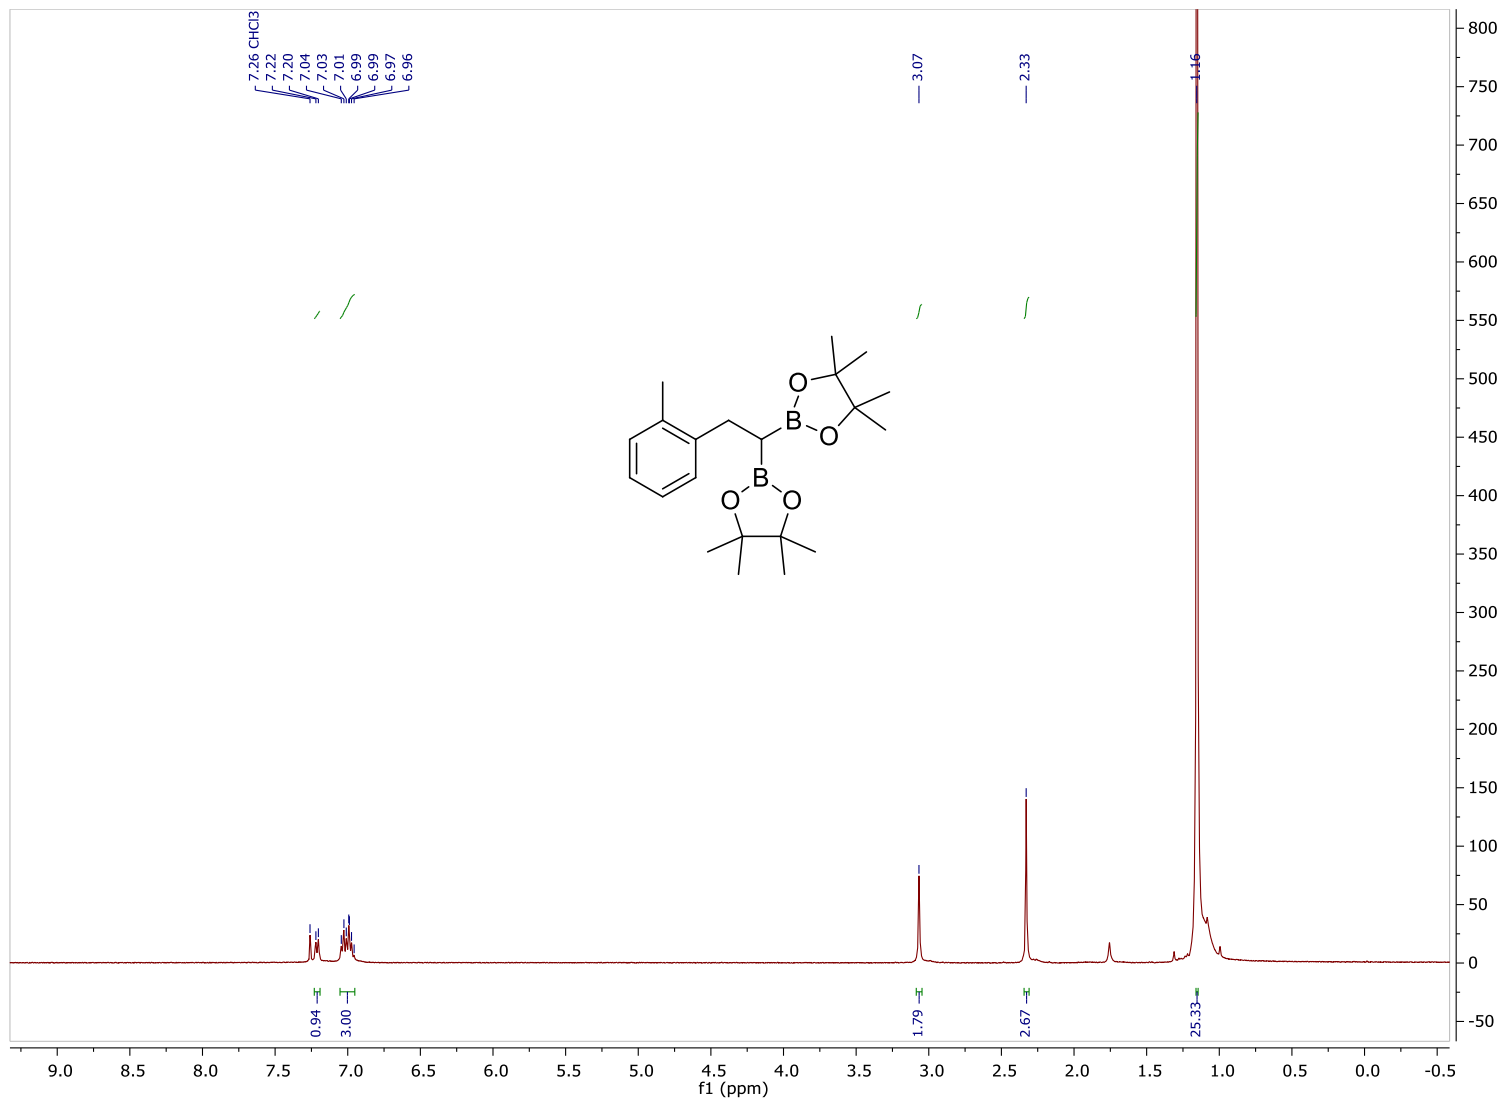

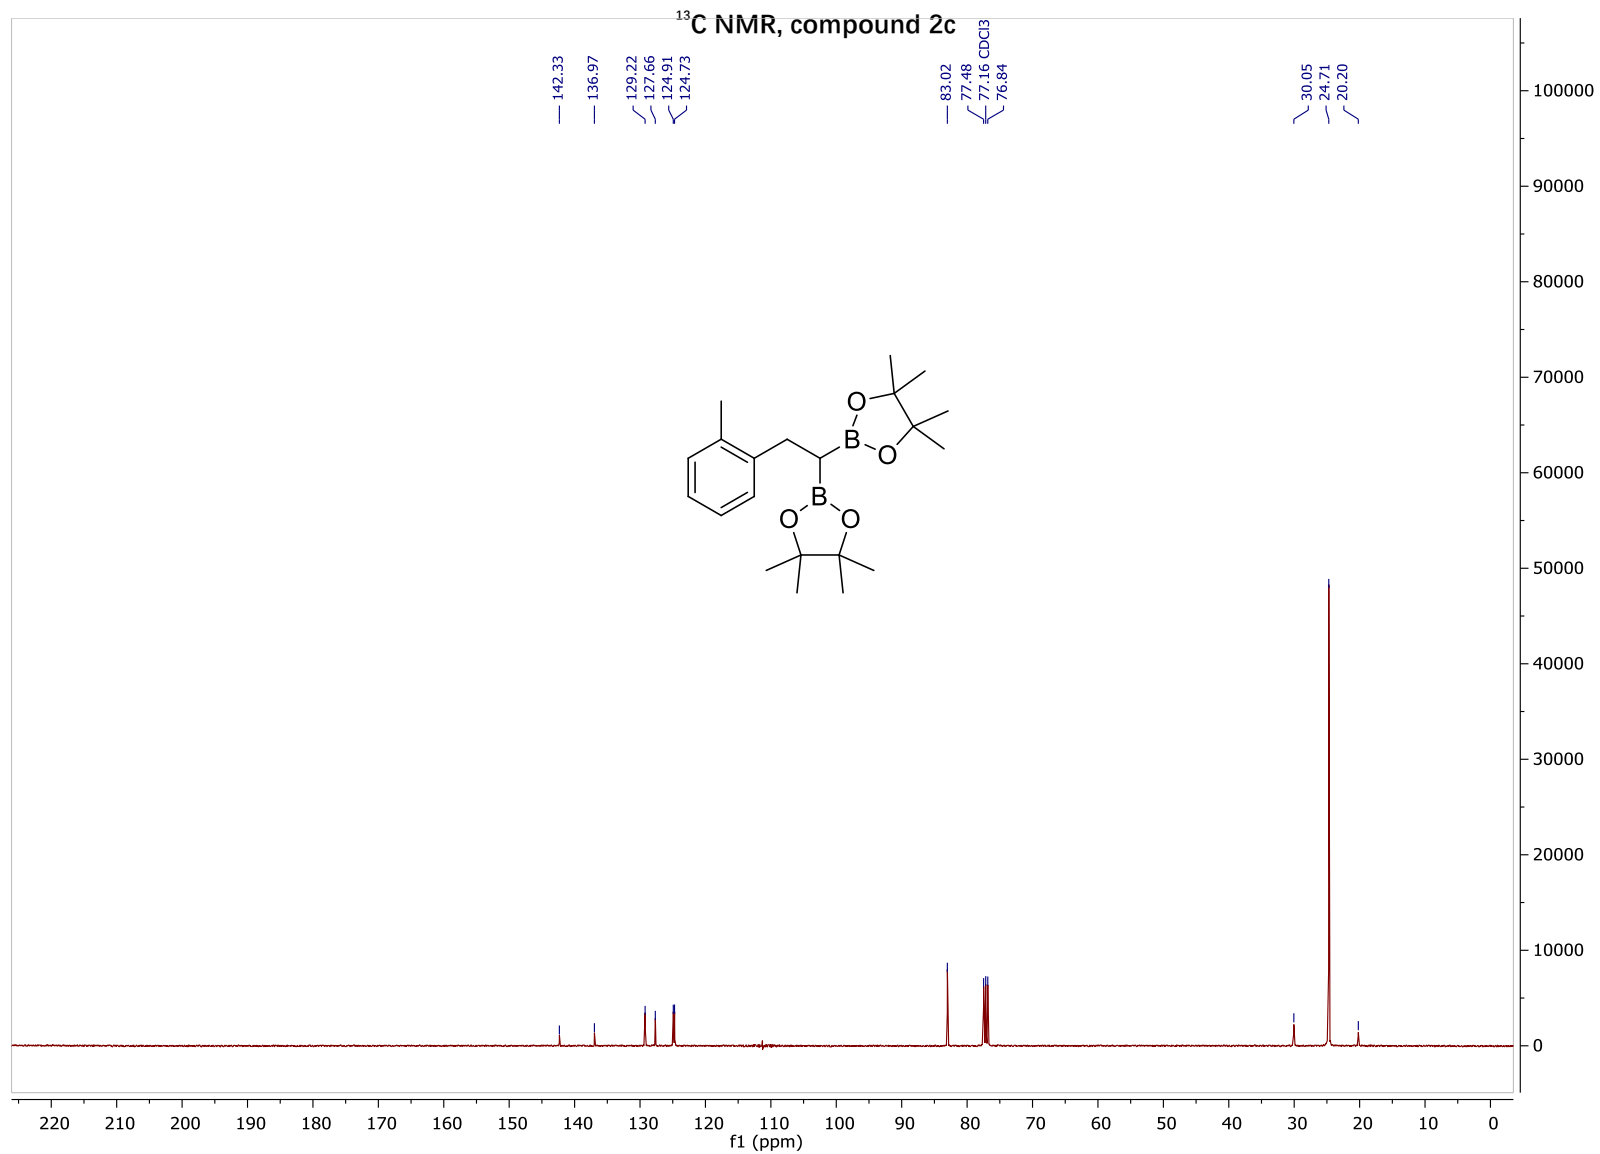

<sup>11</sup>B NMR, compound 2c

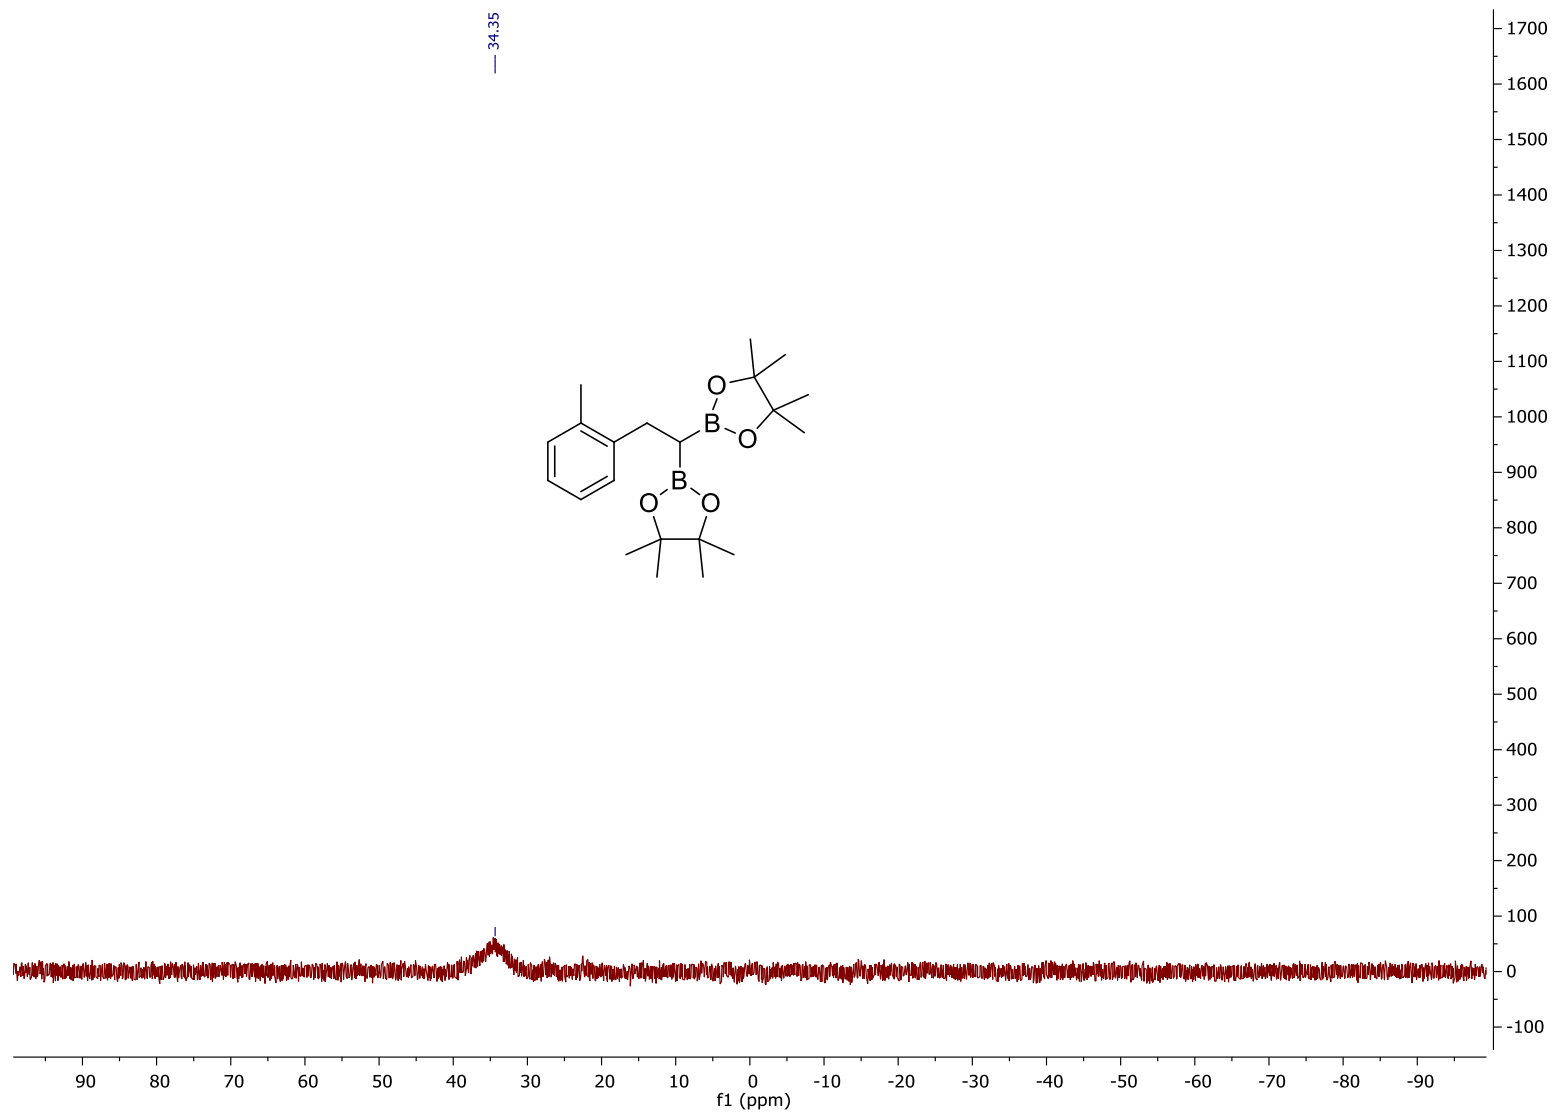

<sup>1</sup>H NMR, compound 2d

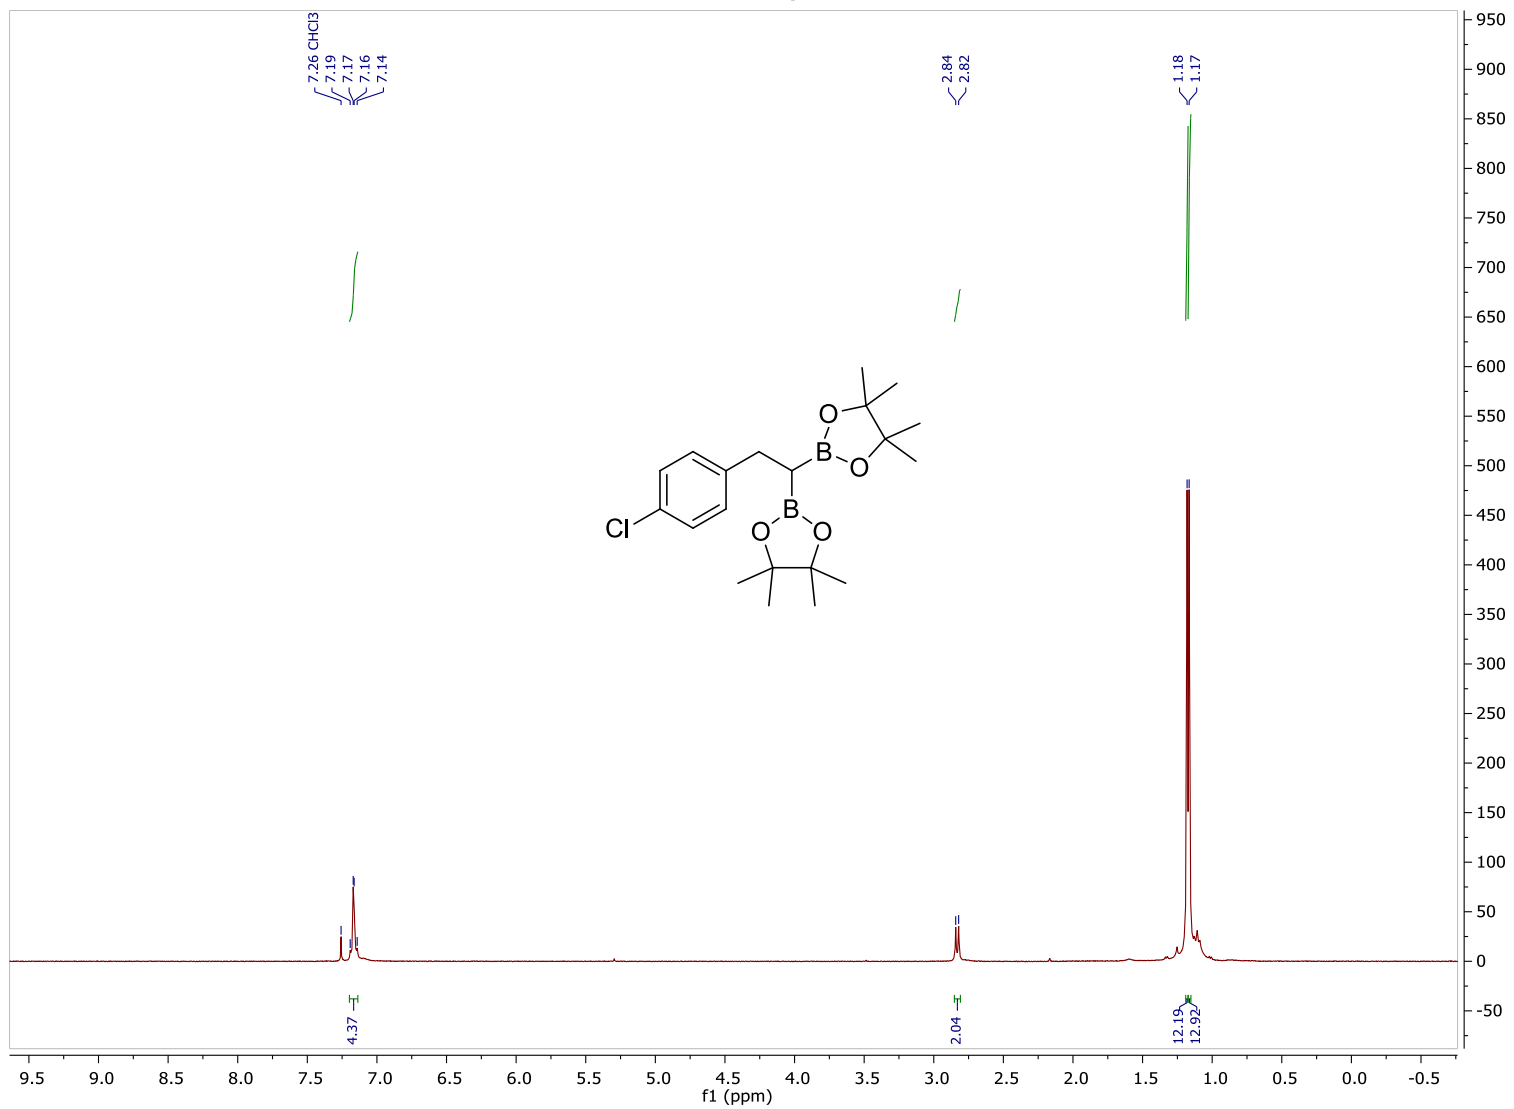

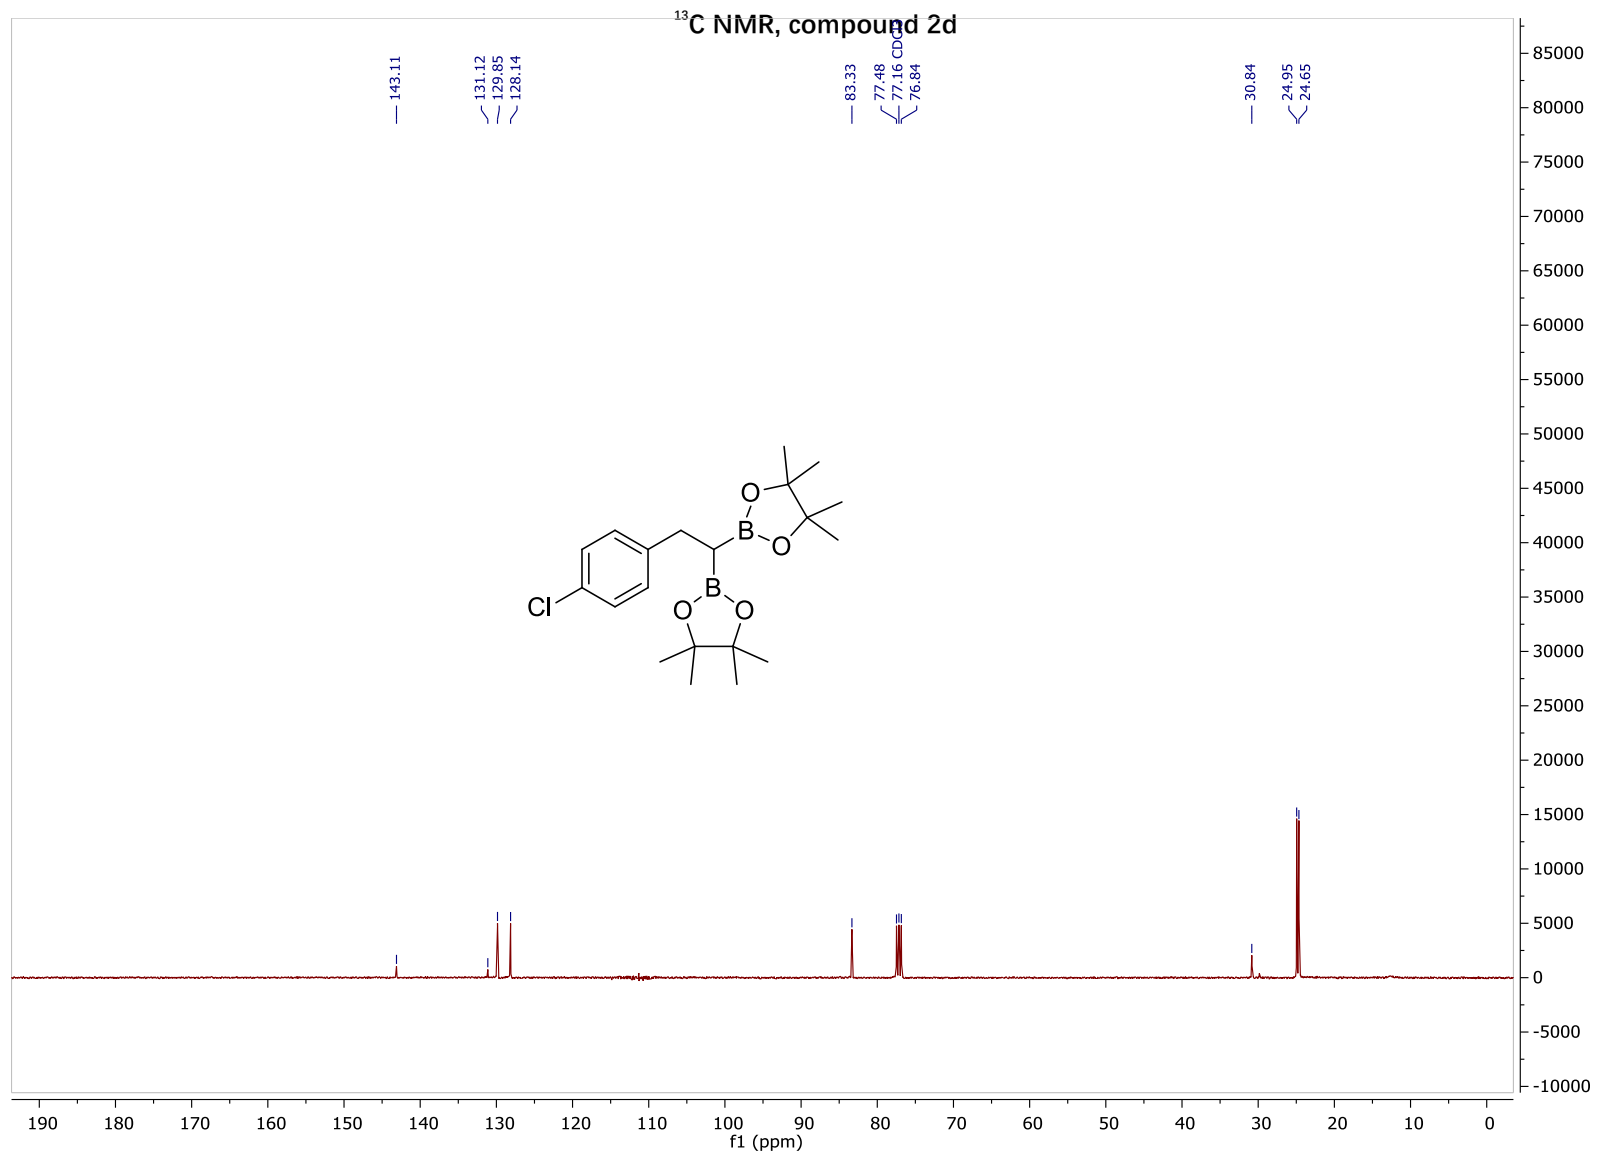

<sup>11</sup>B NMR, compound 2d

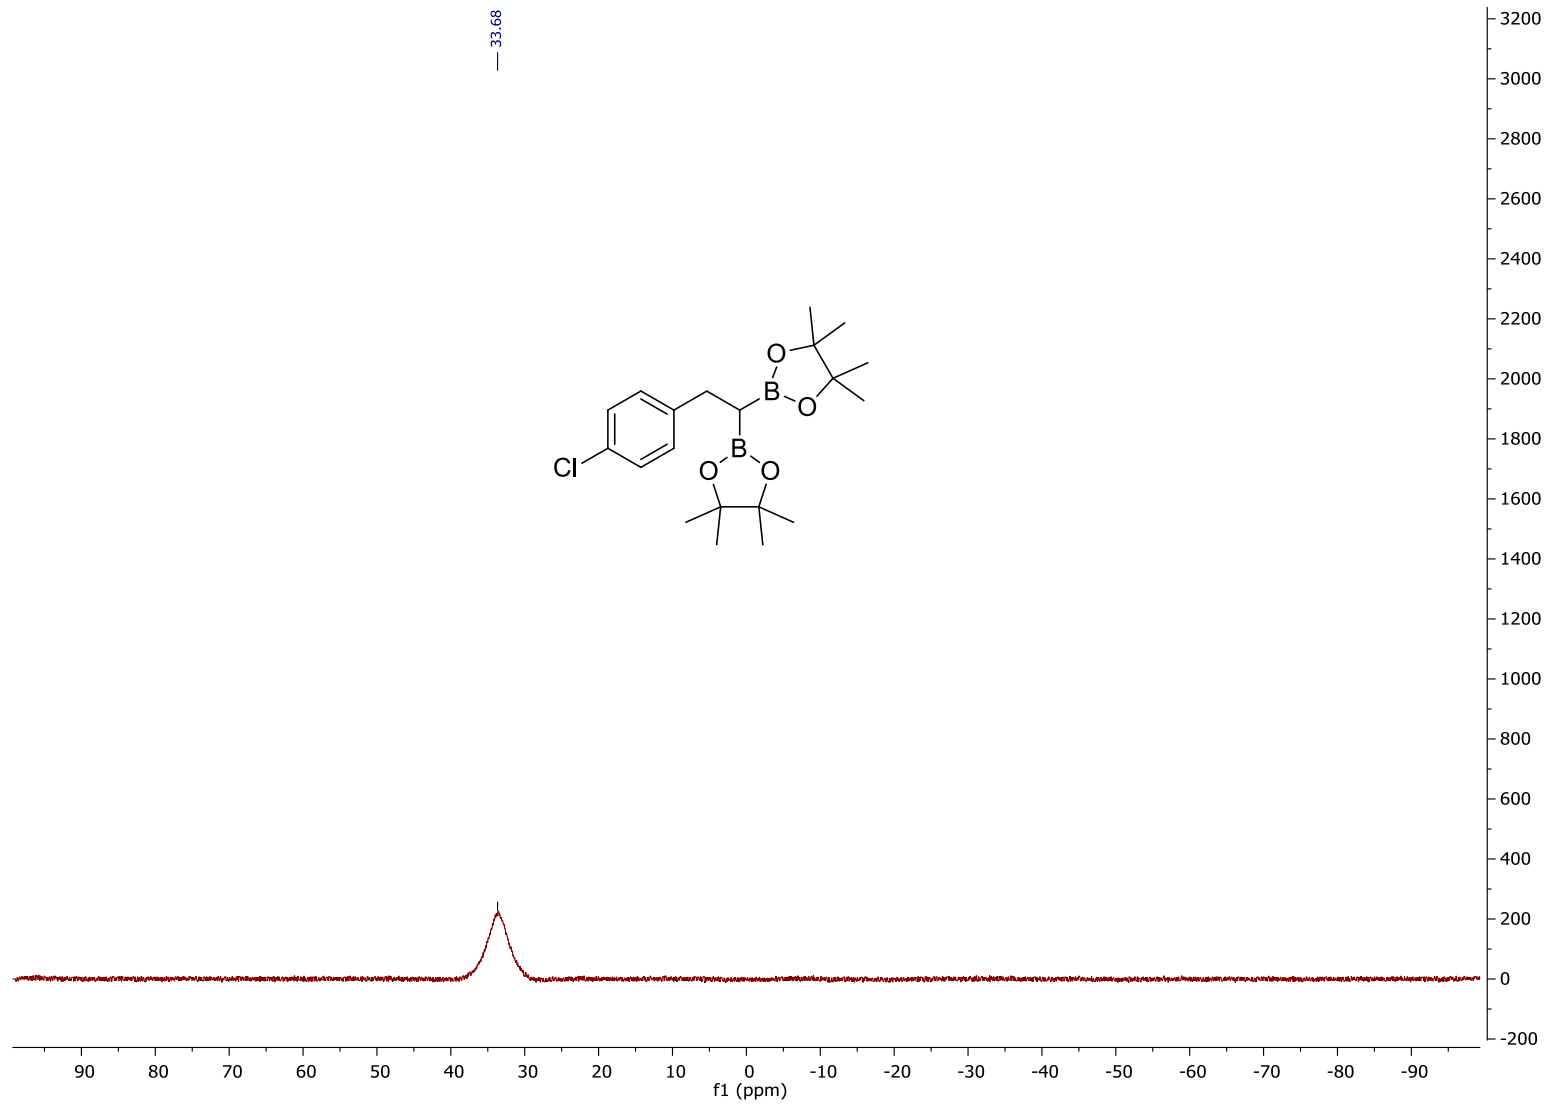

<sup>1</sup>H NMR, compound 2e

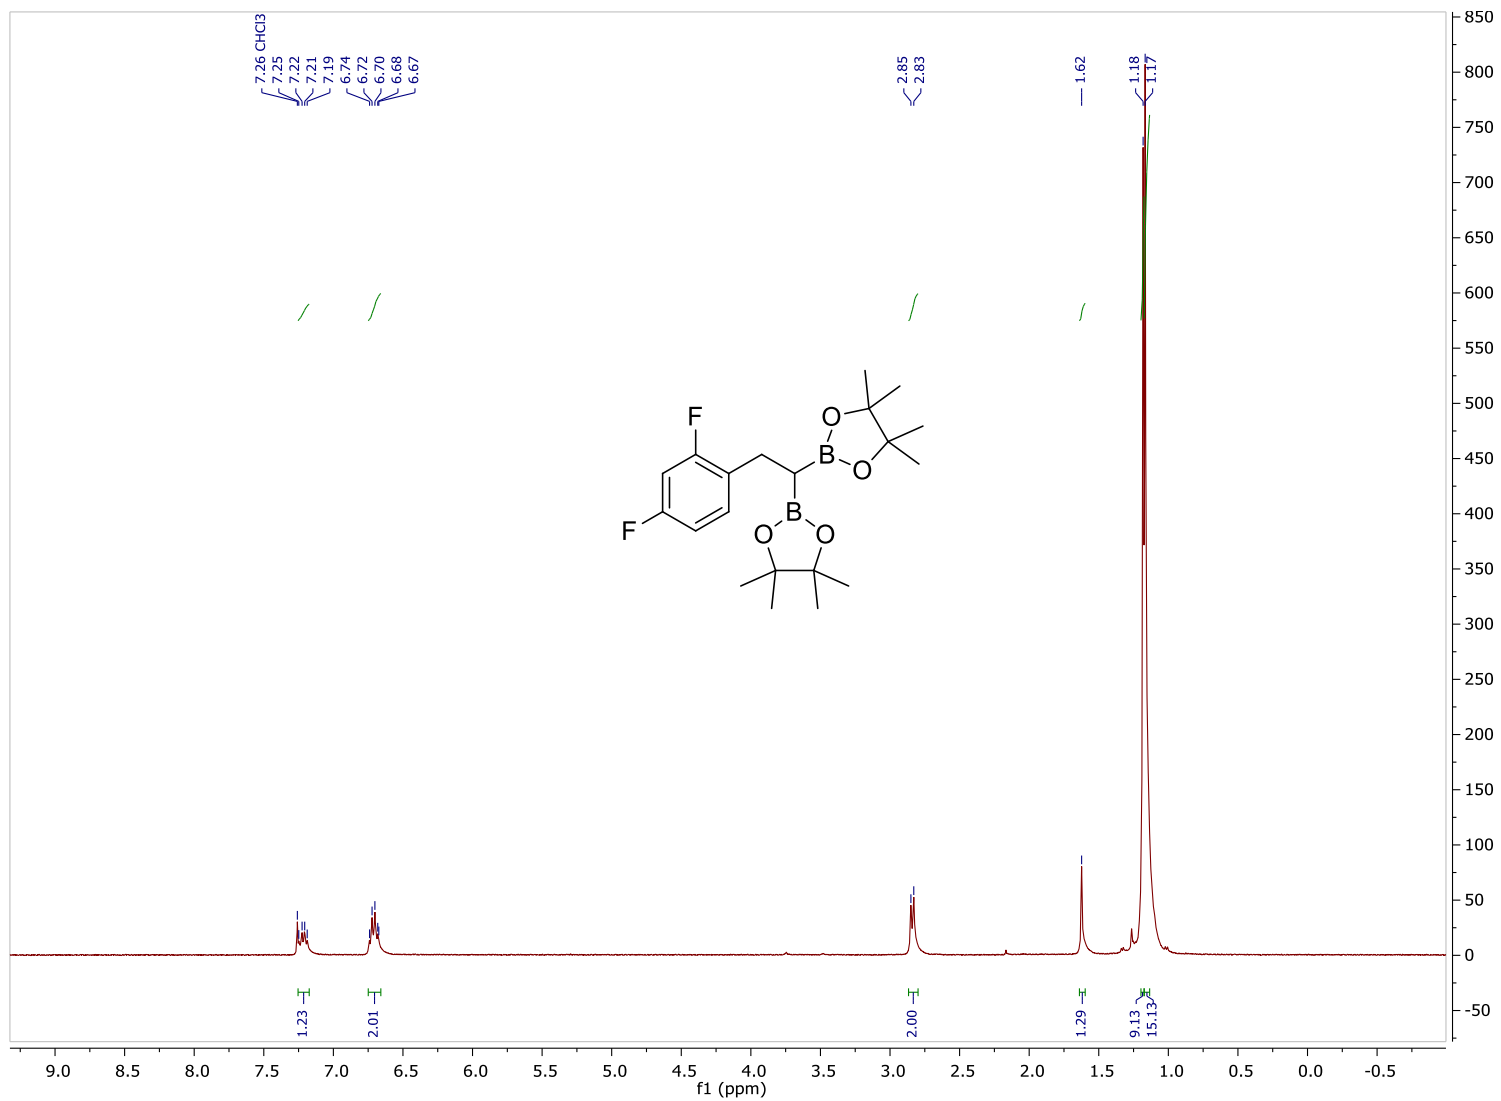

<sup>13</sup>C NMR, compound 2e

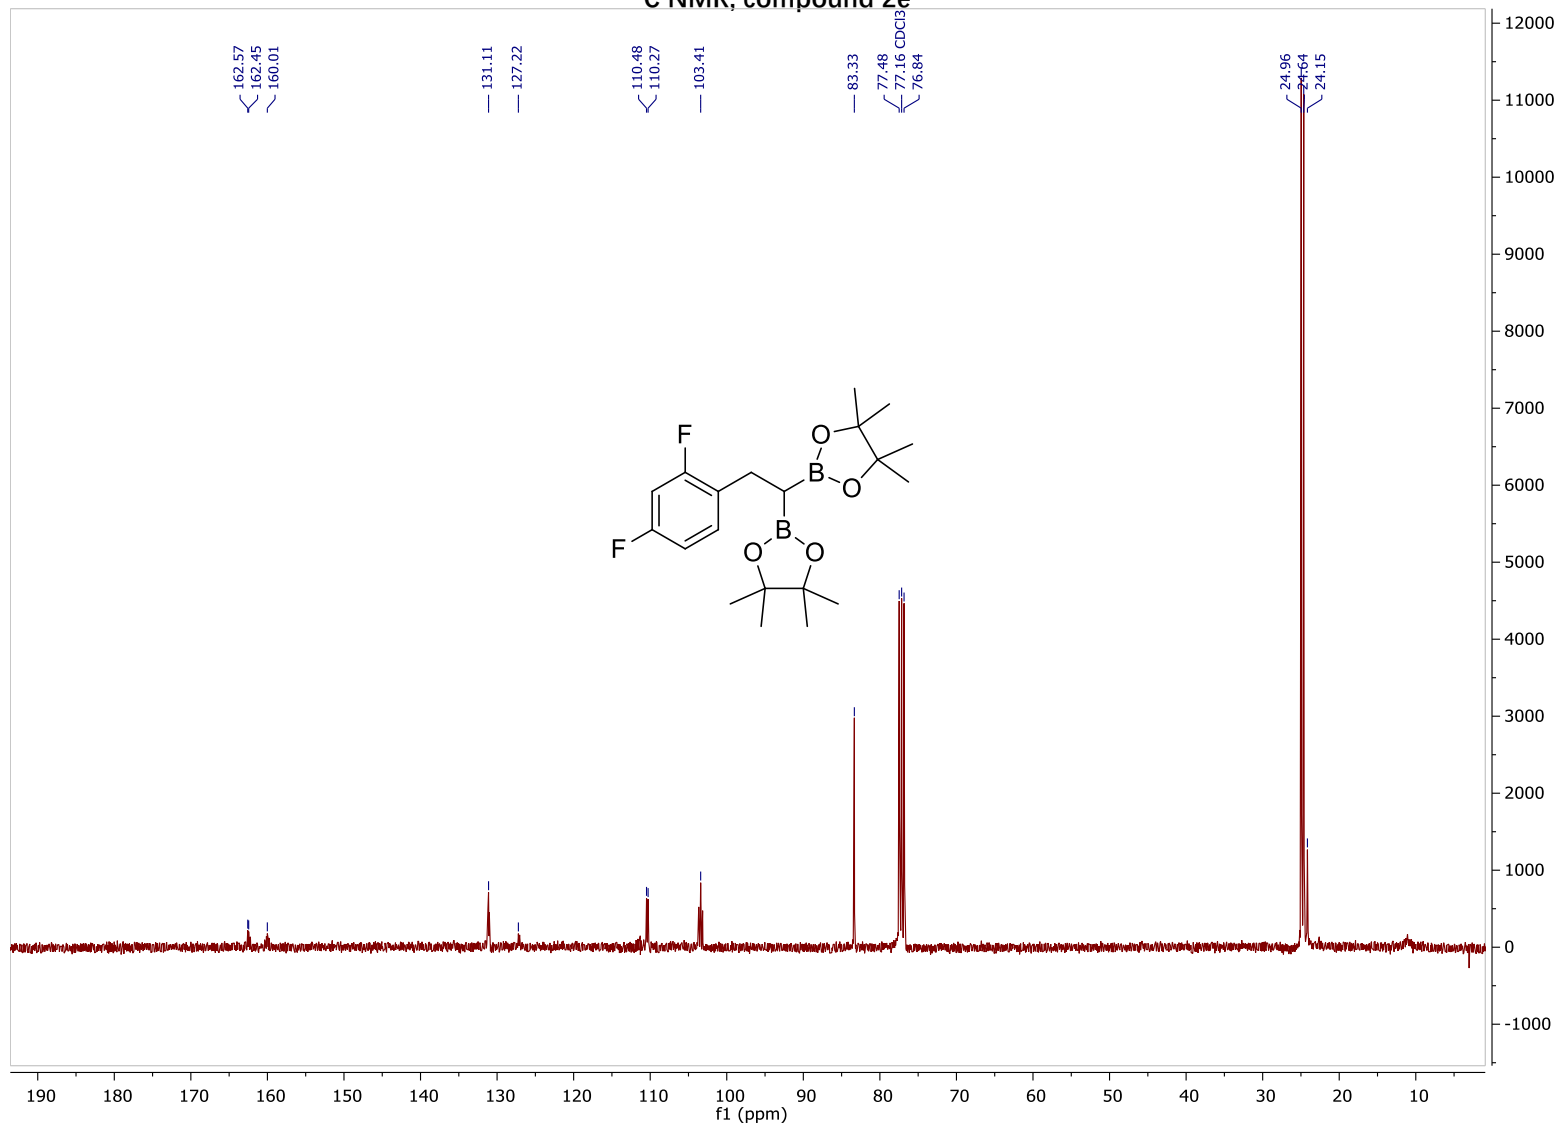



<sup>11</sup>B NMR, compound 2e

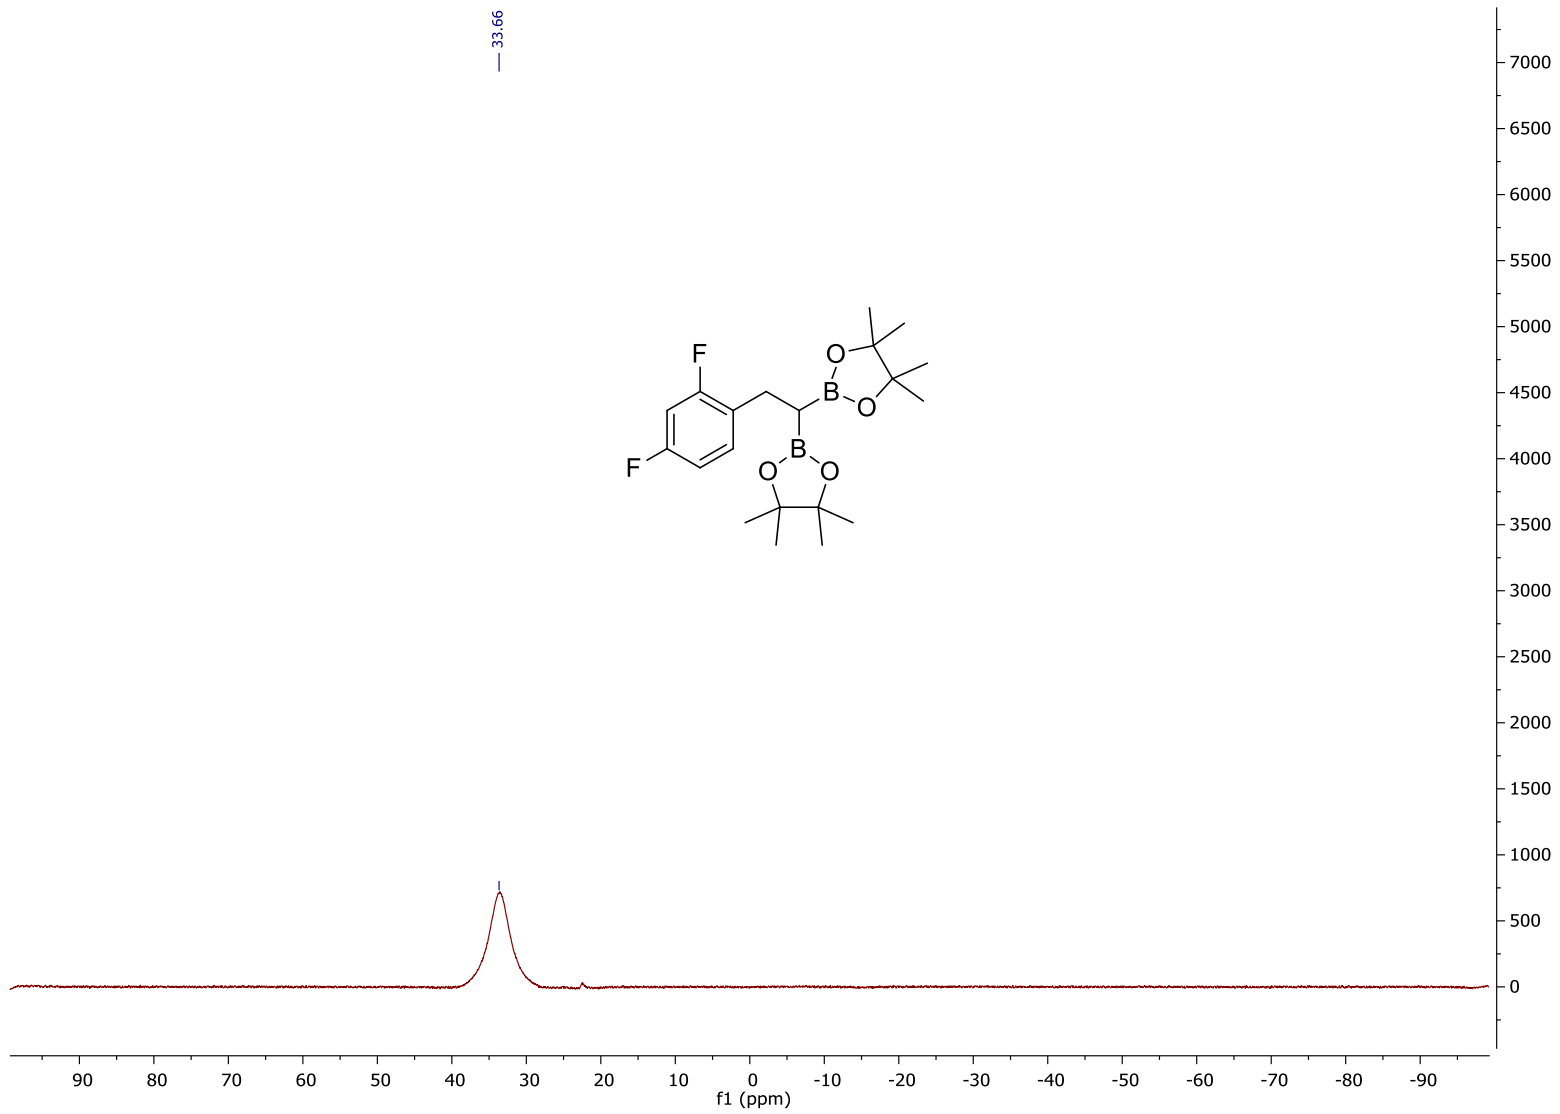

<sup>19</sup>F NMR, compound 2e

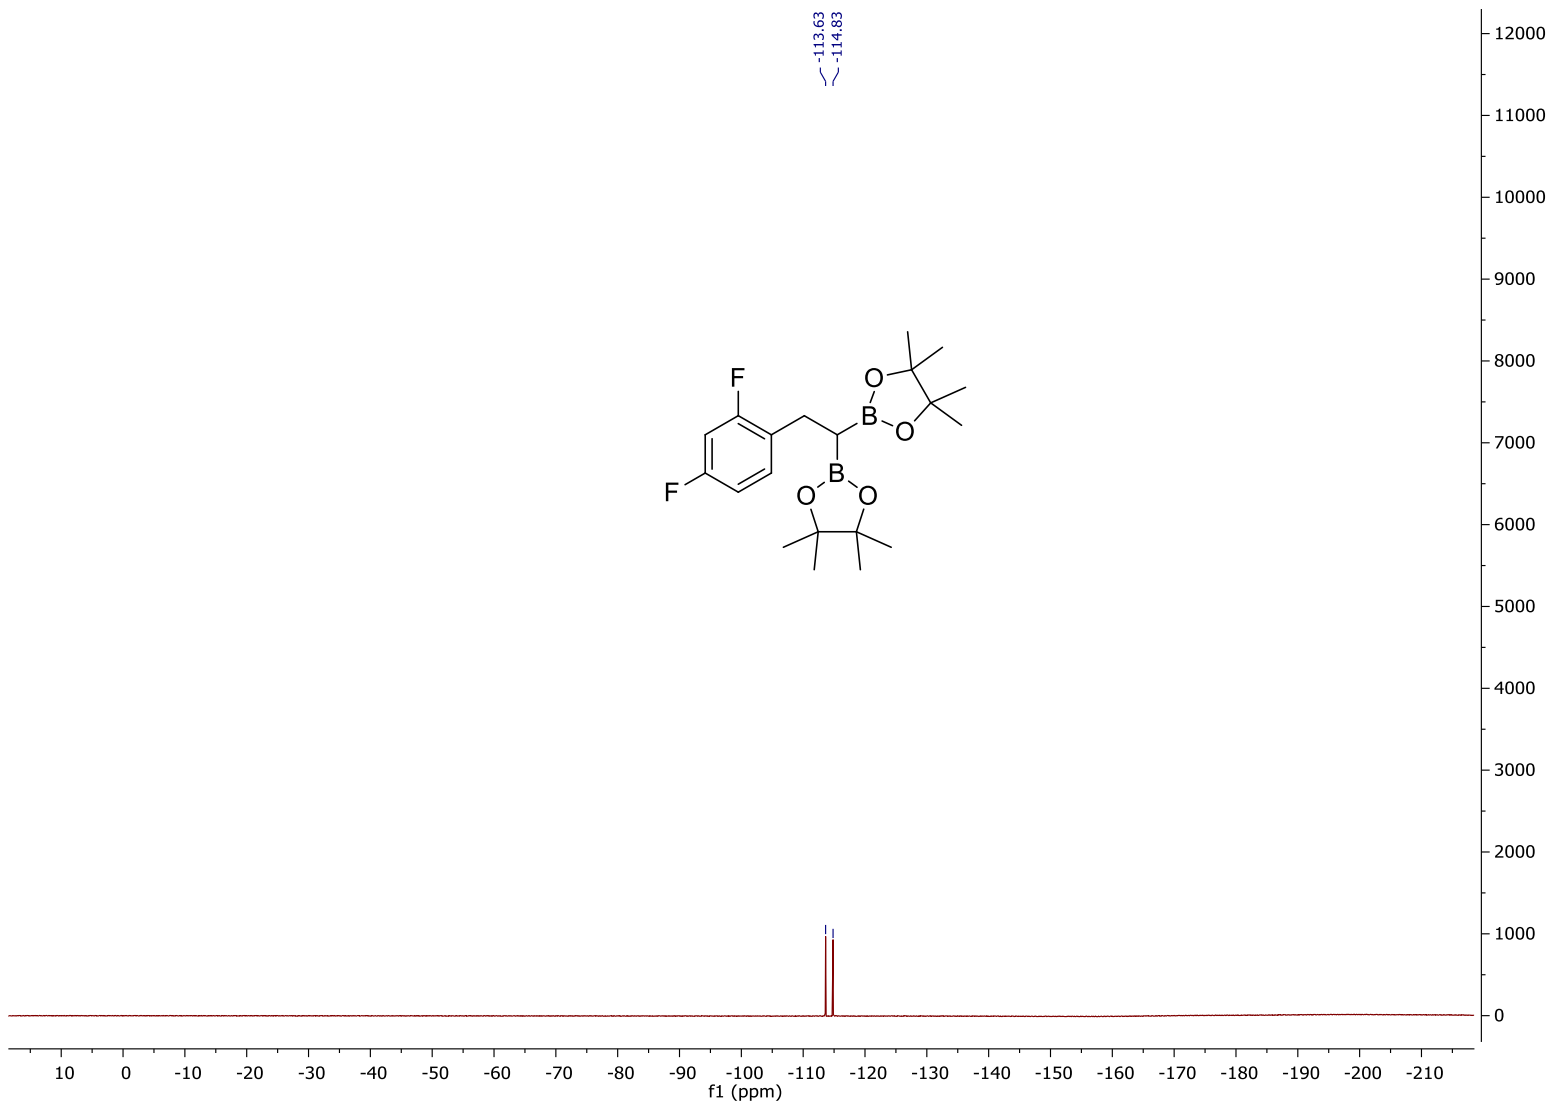

<sup>1</sup>H NMR, compound 2f

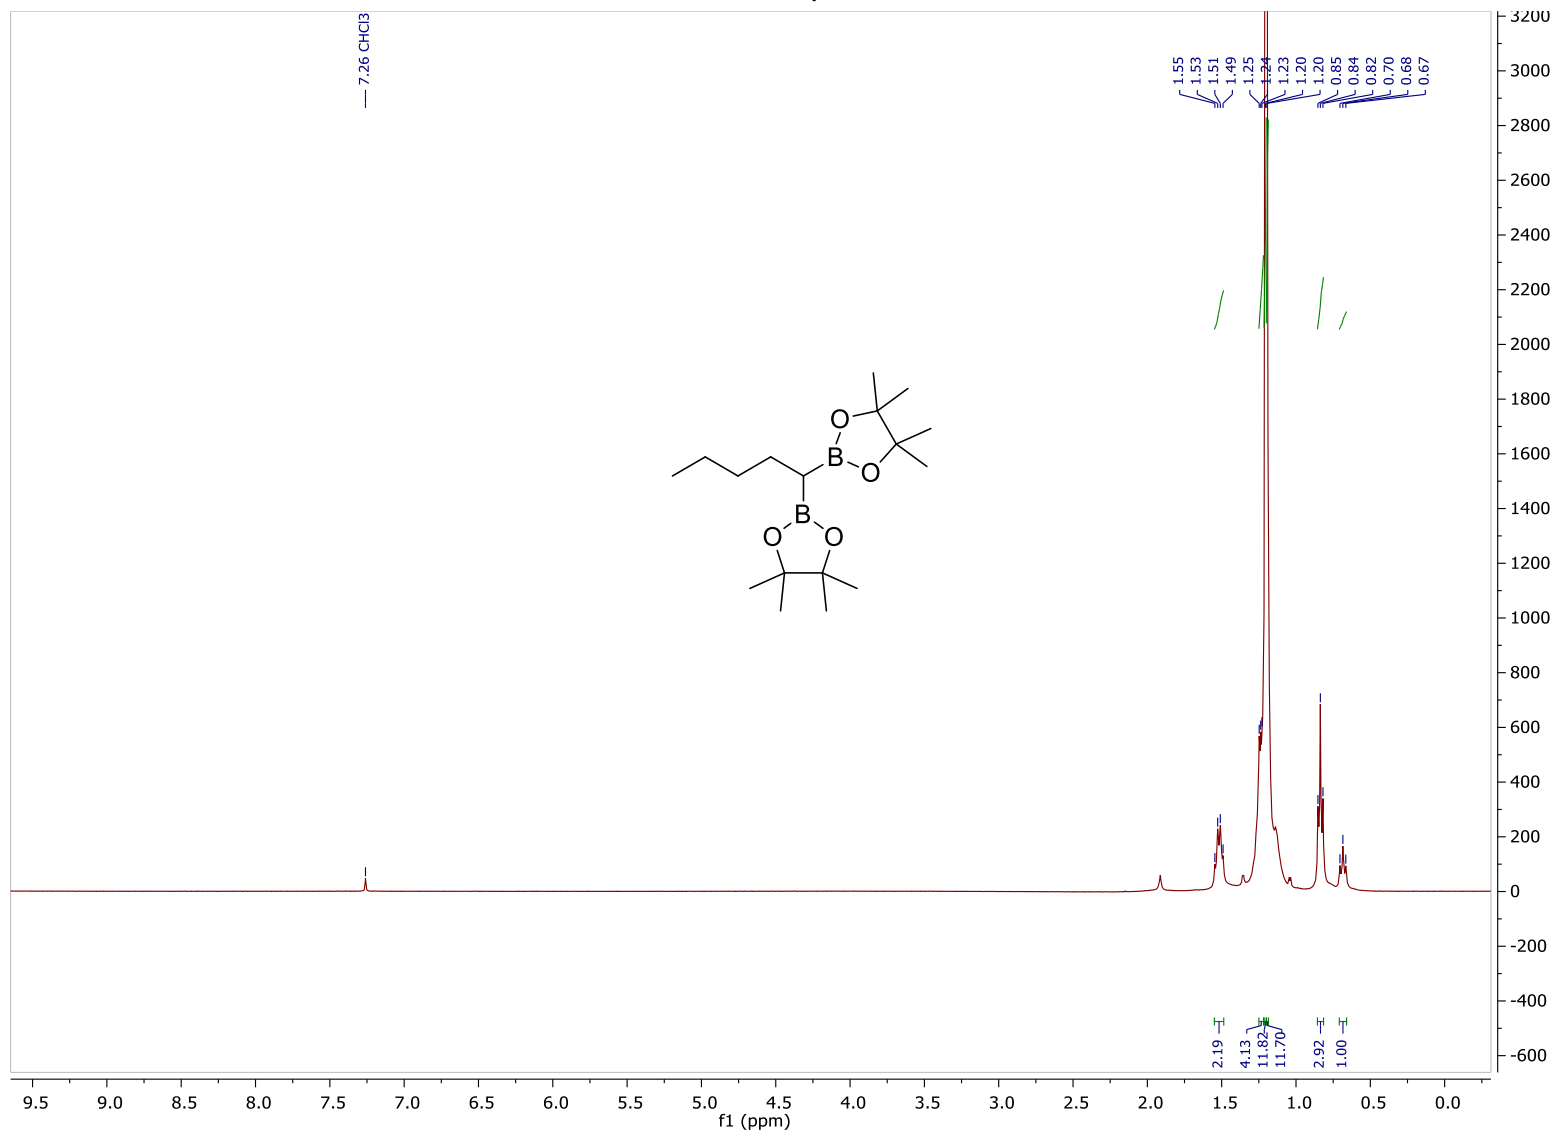

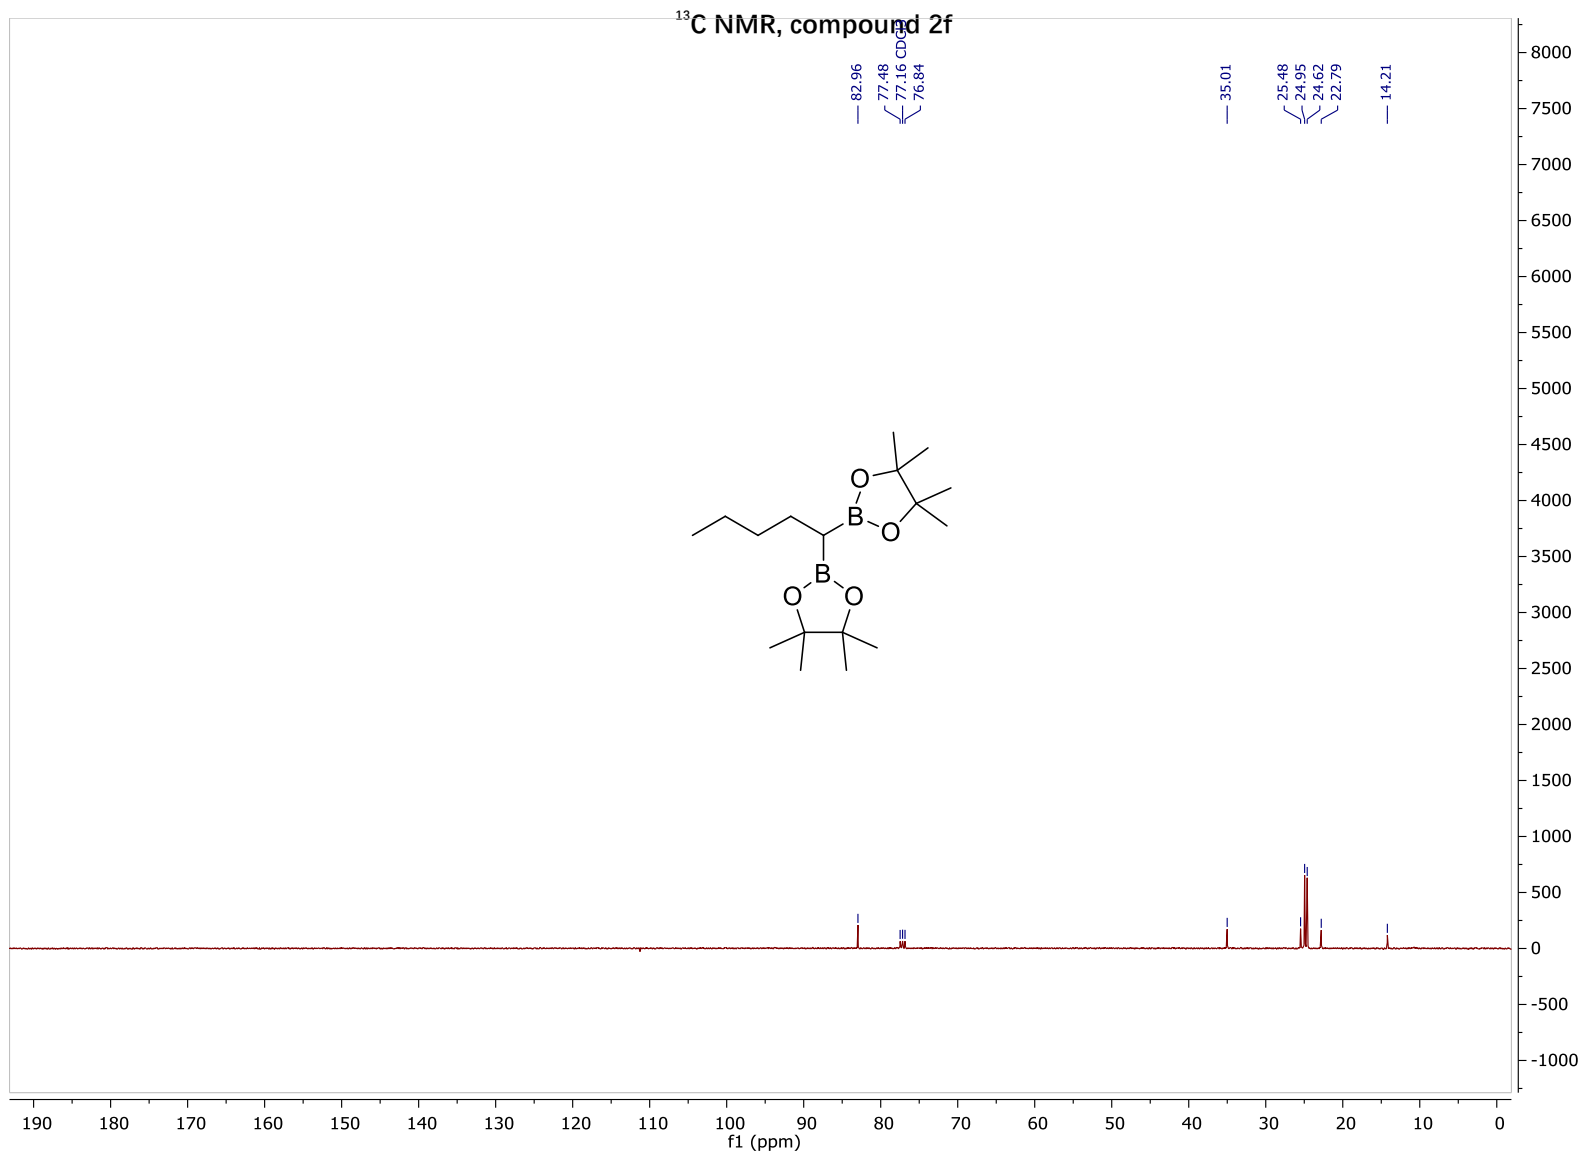

<sup>11</sup>B NMR, compound 2f

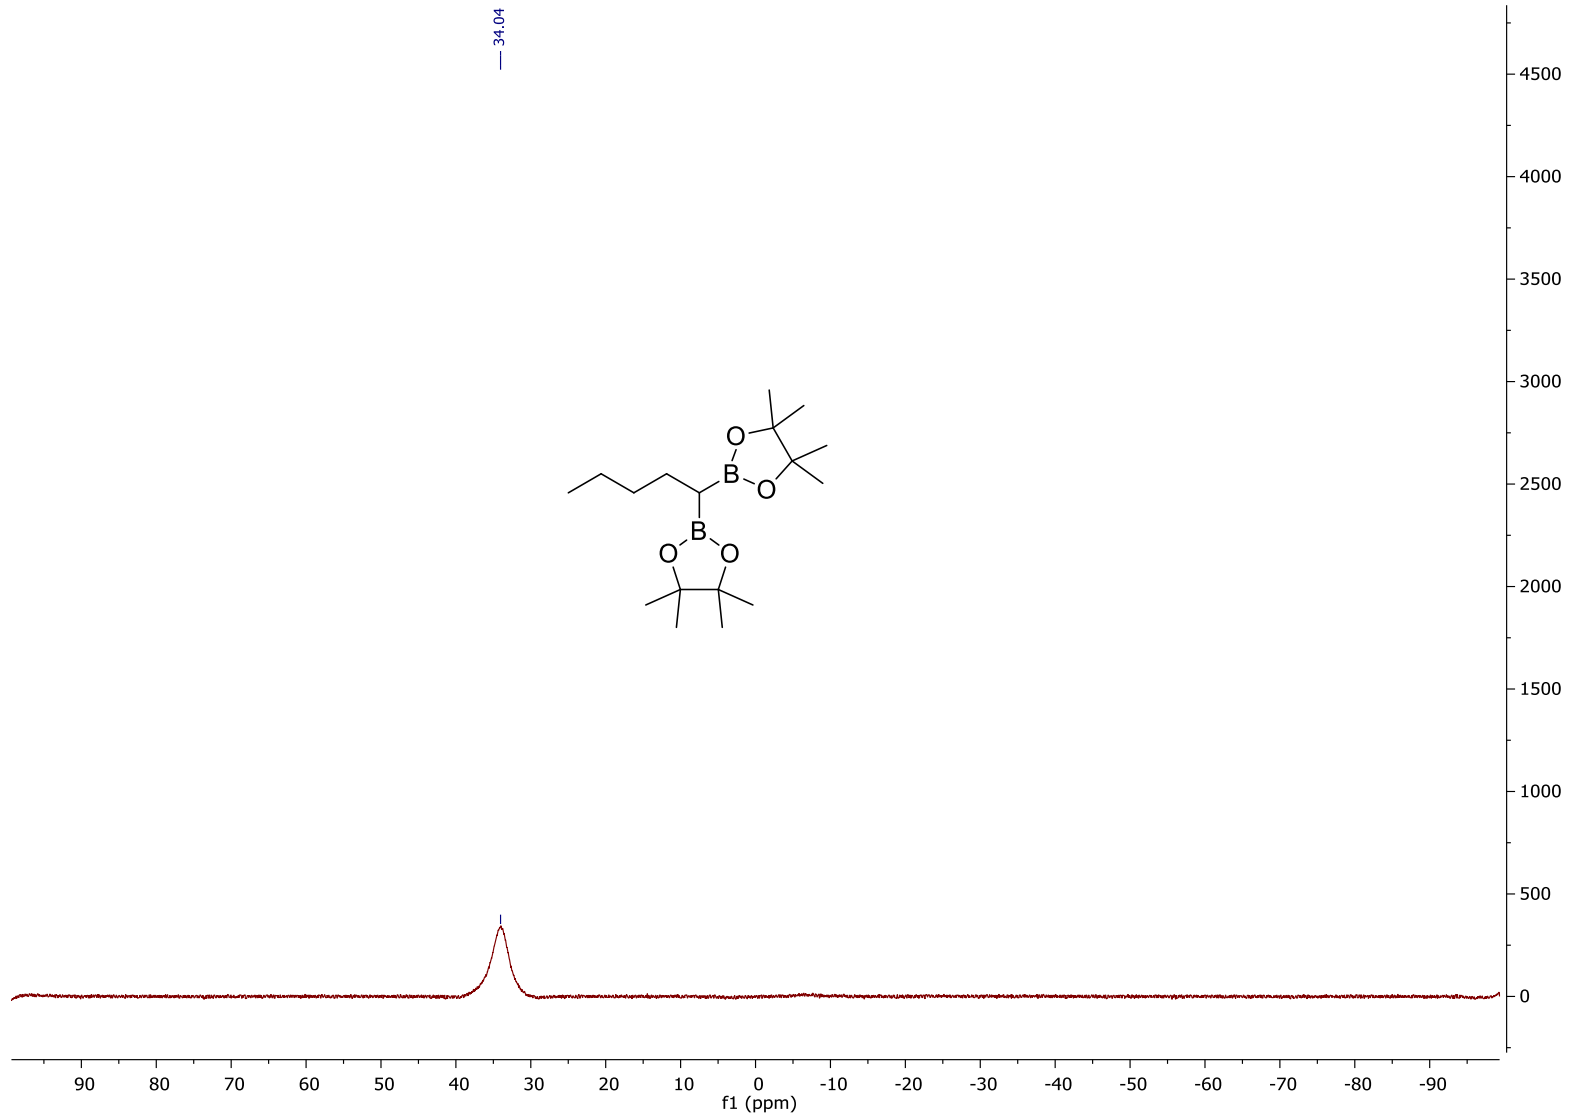

<sup>1</sup>H NMR, compound 2g

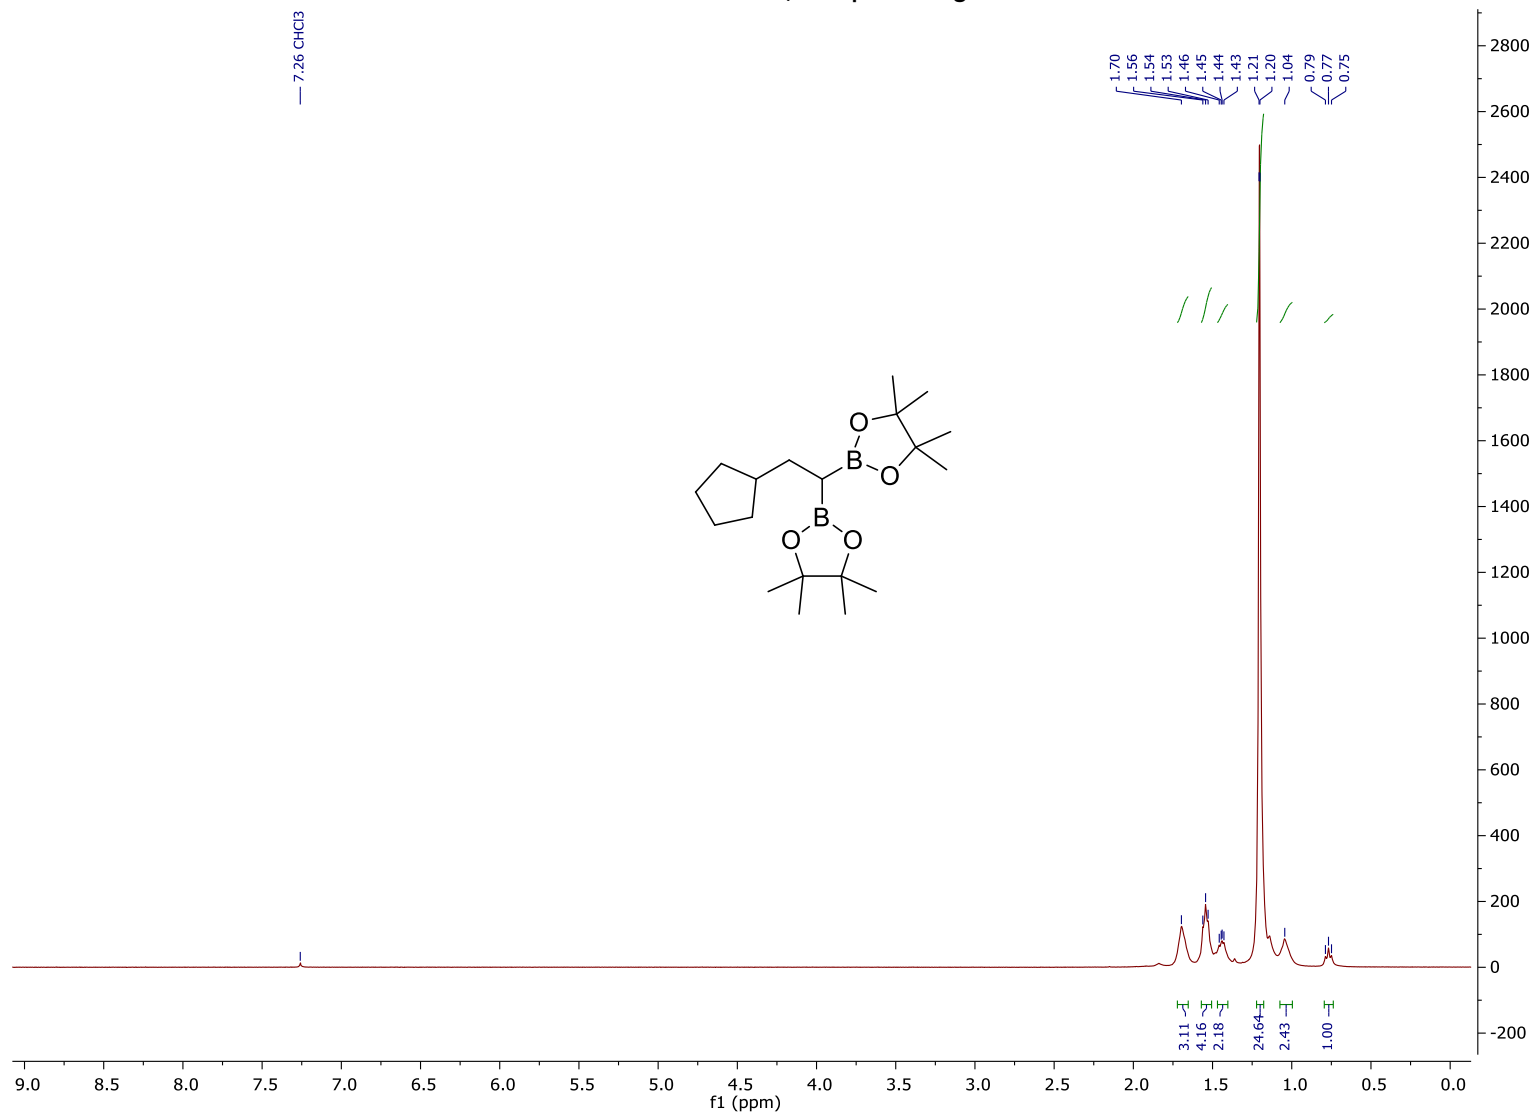

<sup>13</sup>C NMR, compound 2g

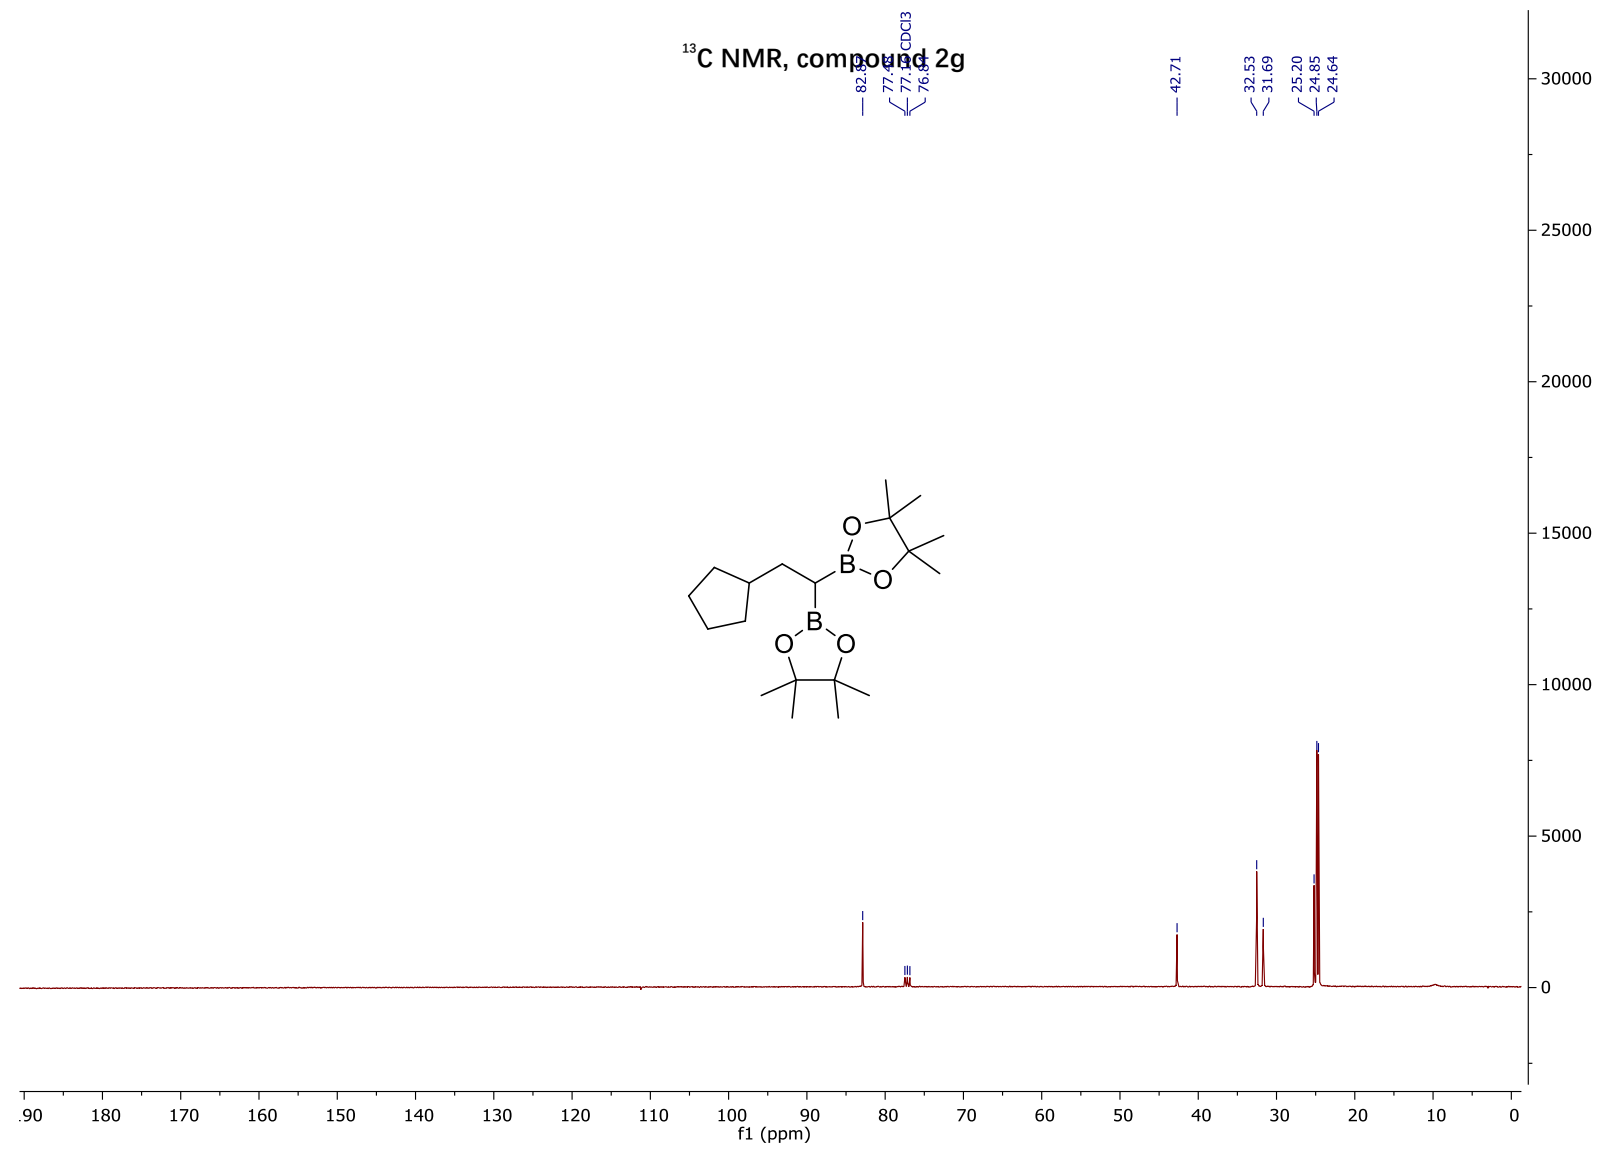

<sup>11</sup>B NMR, compound 2g

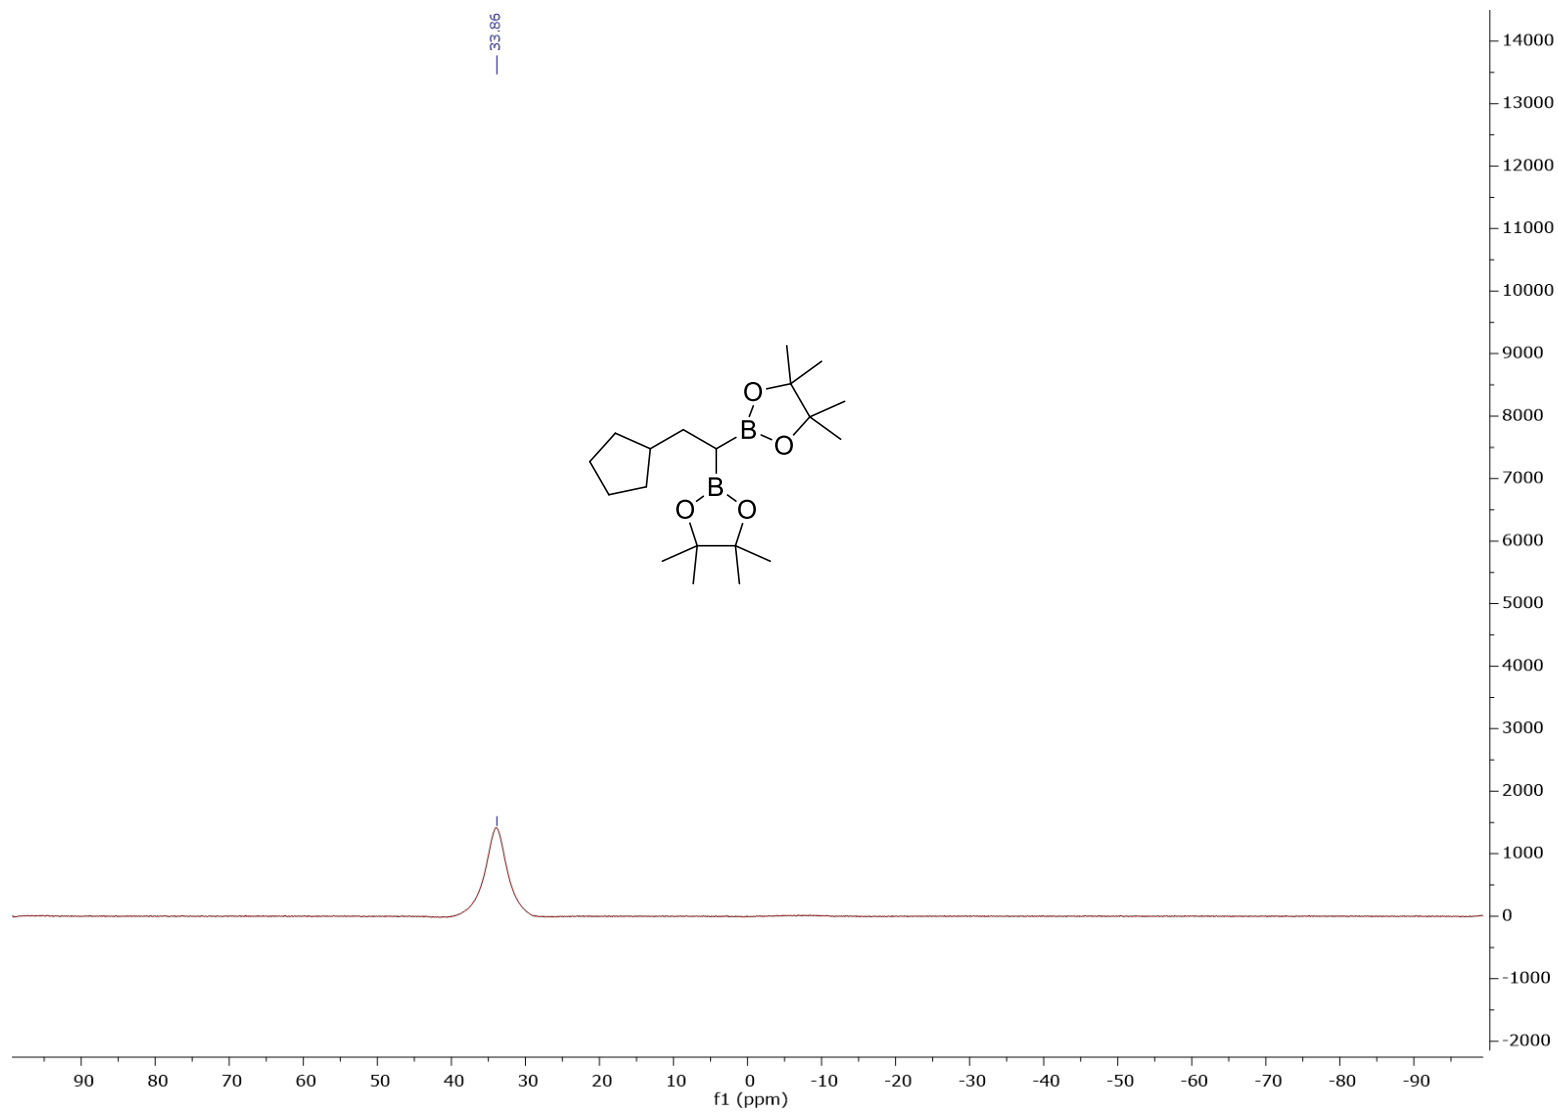



<sup>1</sup>H NMR, compound 2h

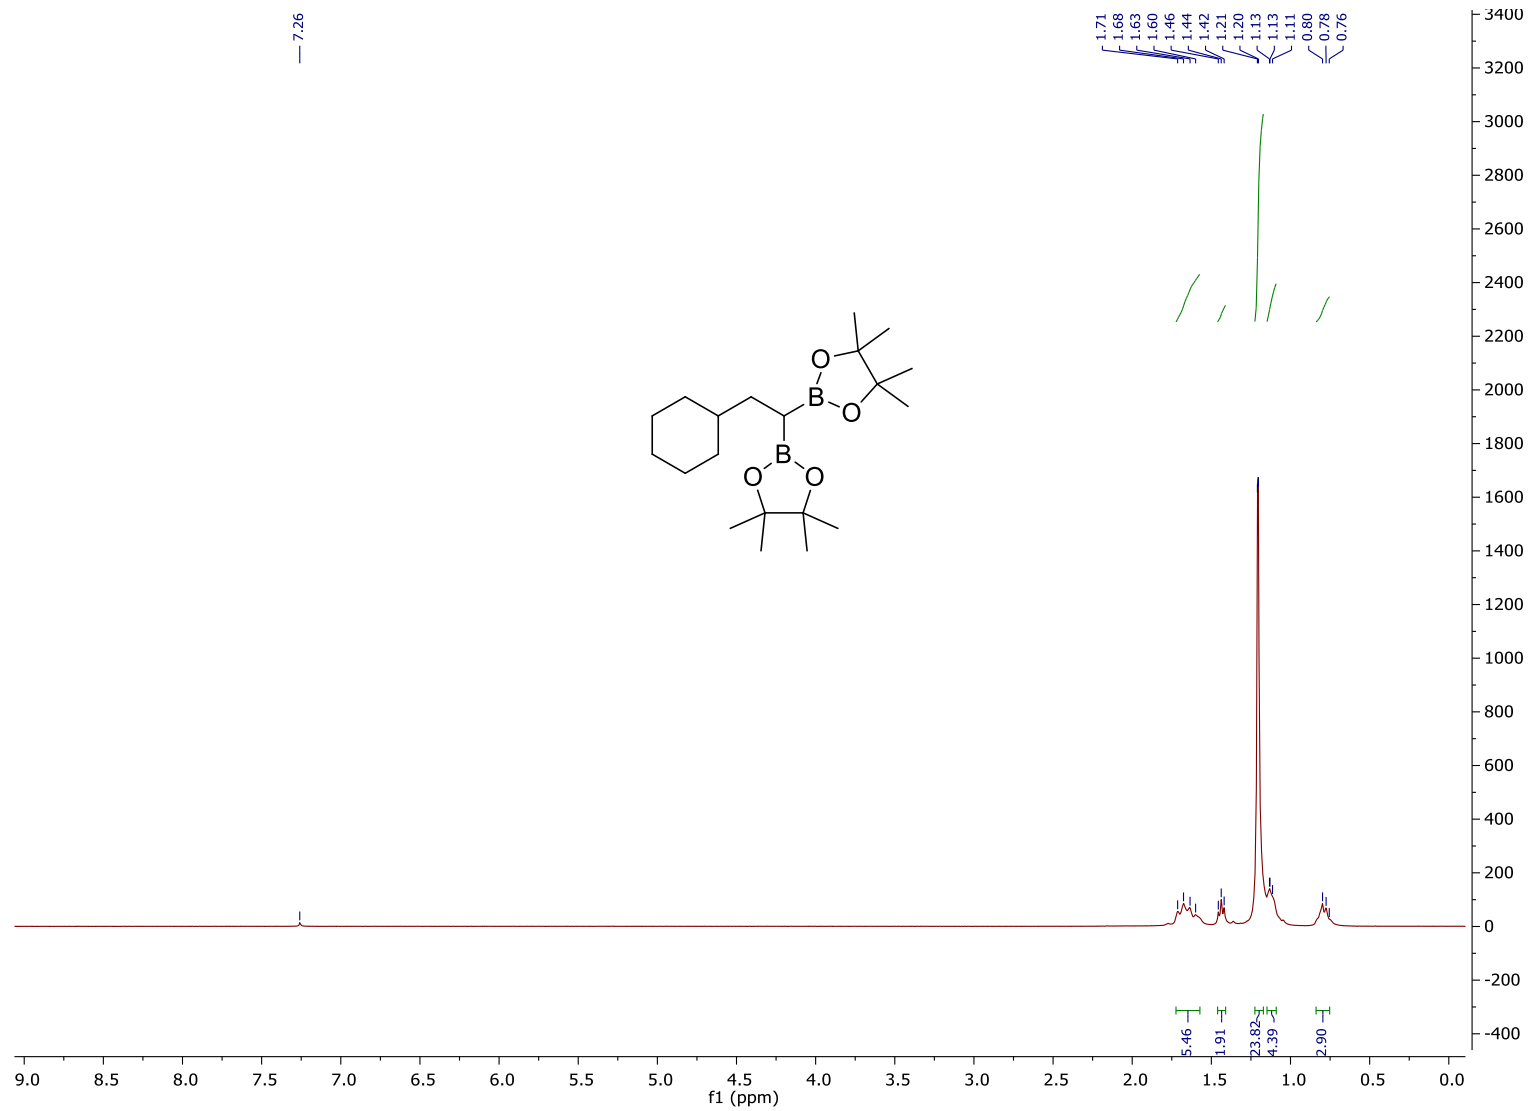

<sup>13</sup>C NMR, compound 2h

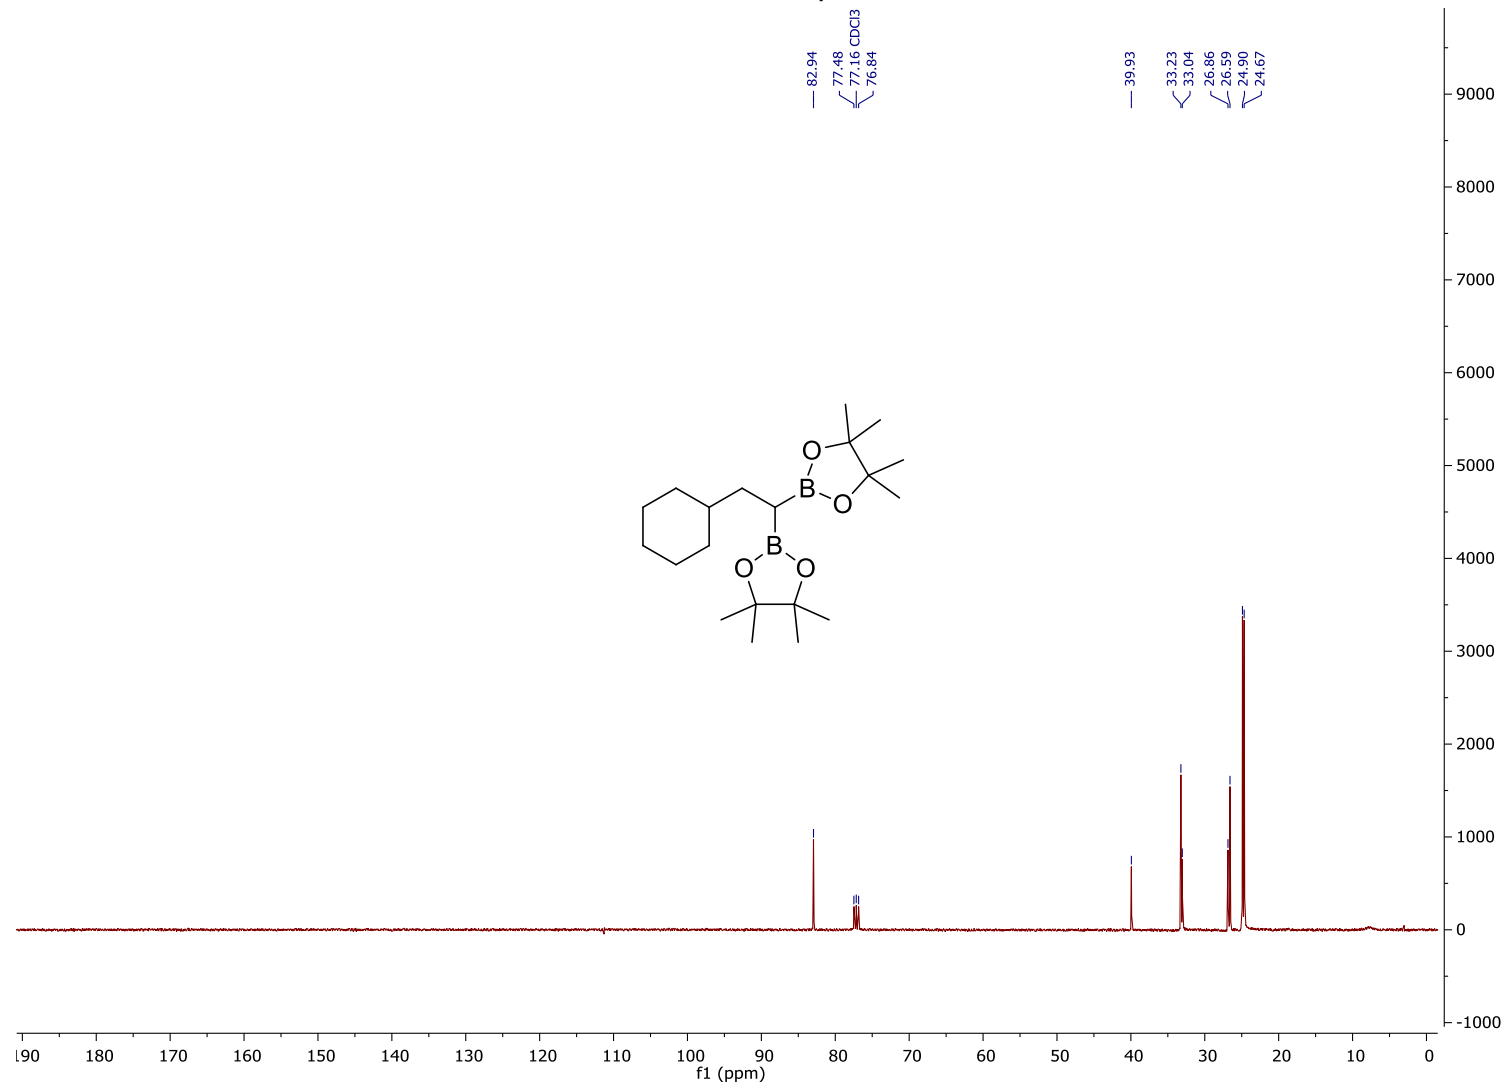

<sup>11</sup>B NMR, compound 2h

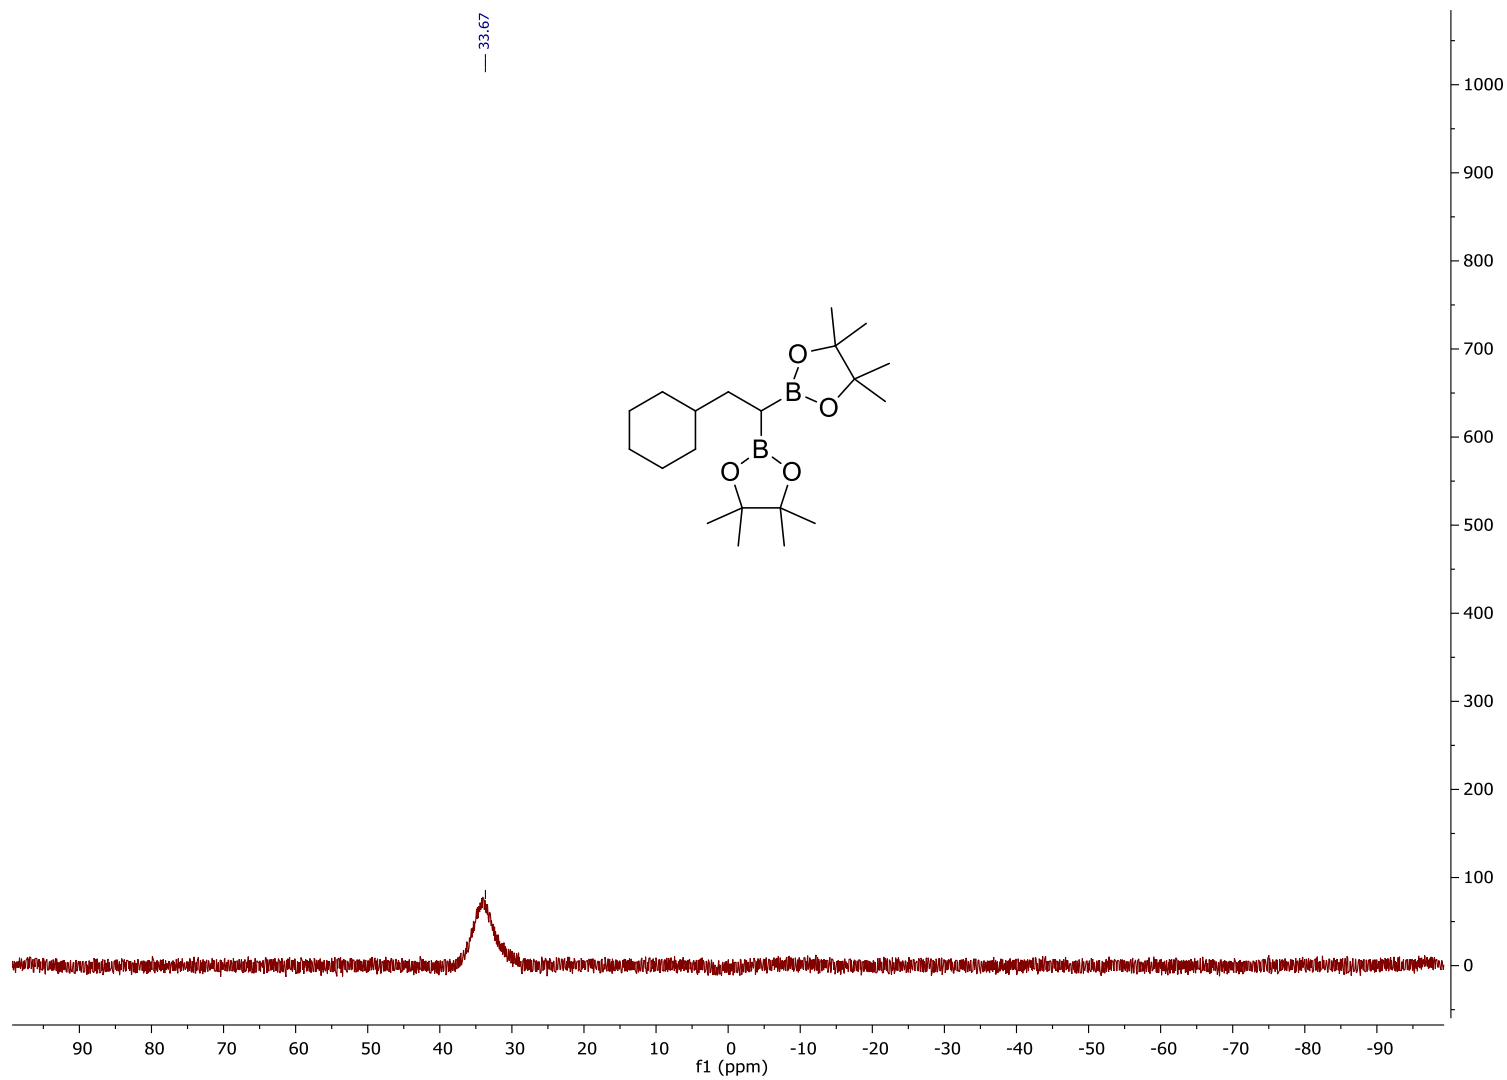

<sup>1</sup>H NMR, compound 2i

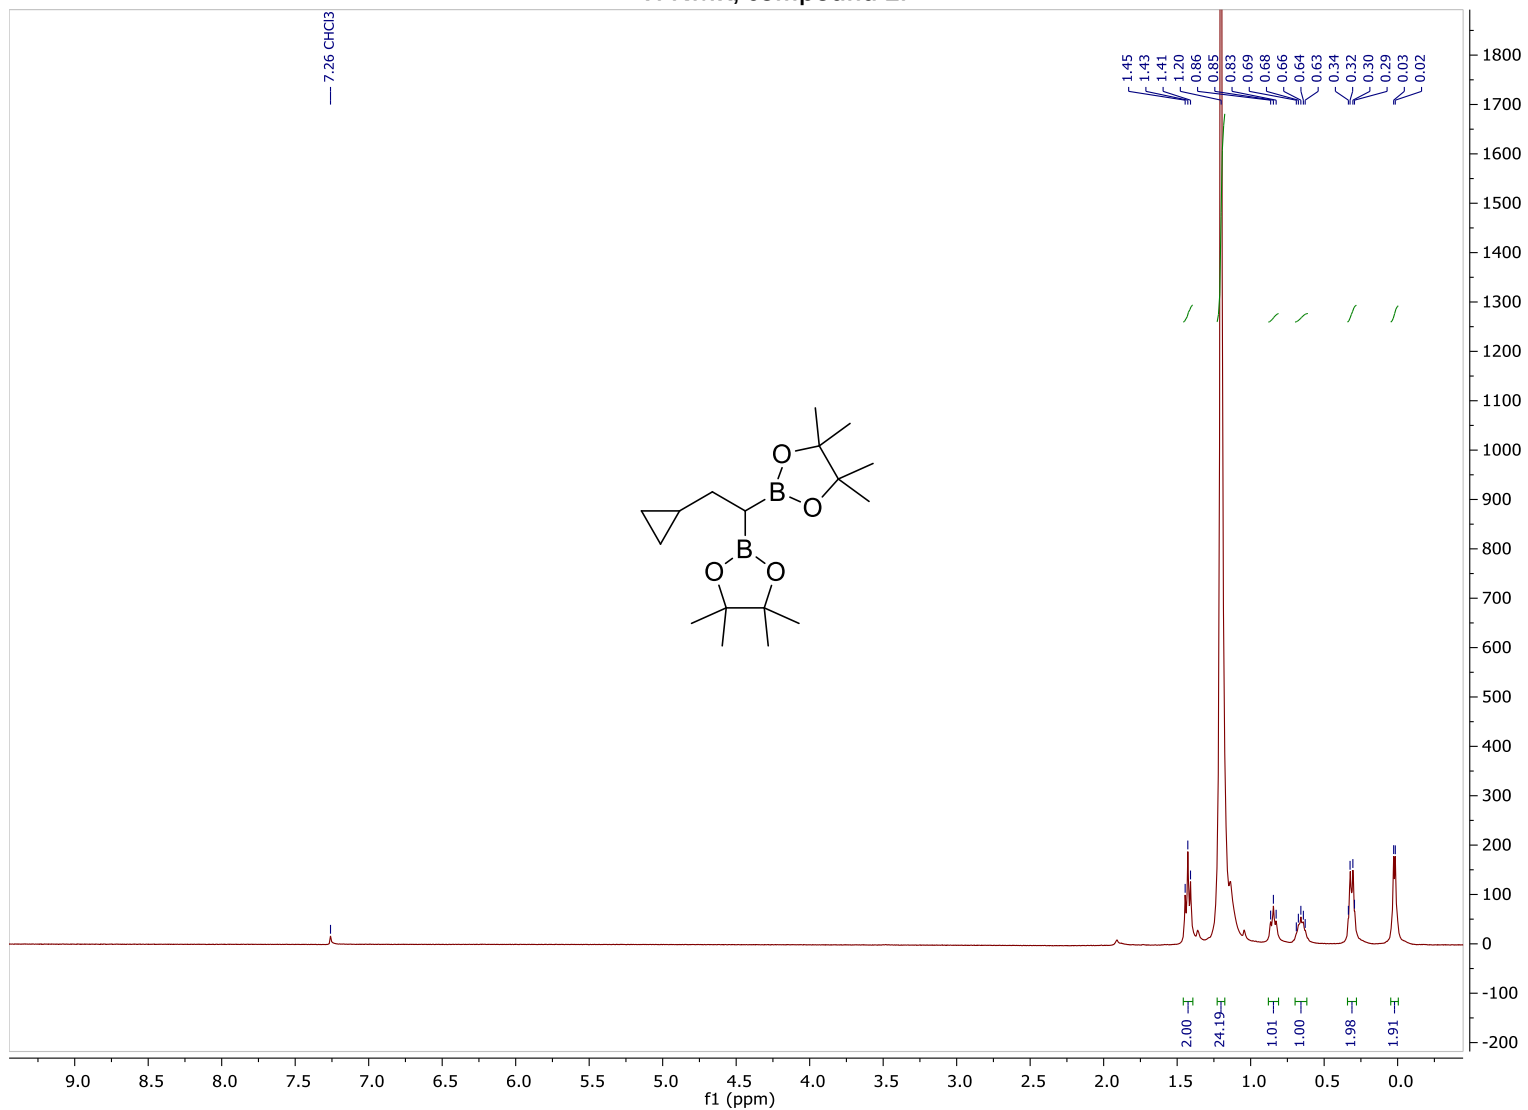

<sup>13</sup>C NMR, compound 2i

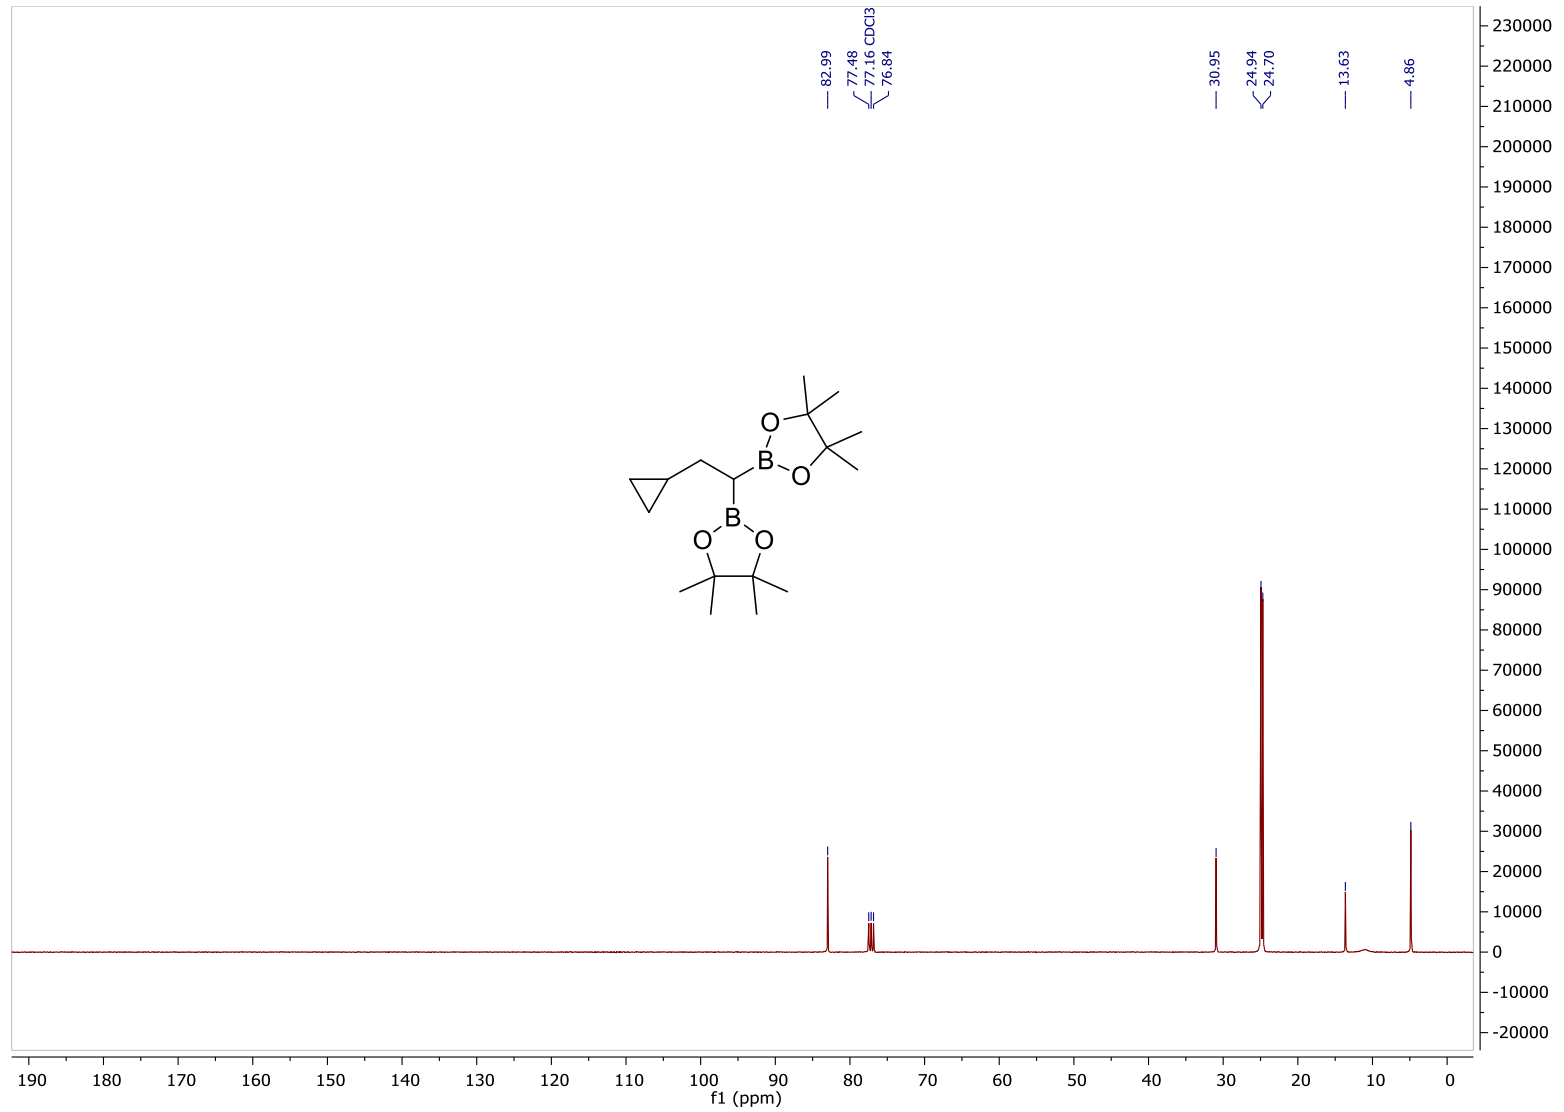

<sup>11</sup>B NMR, compound 2i

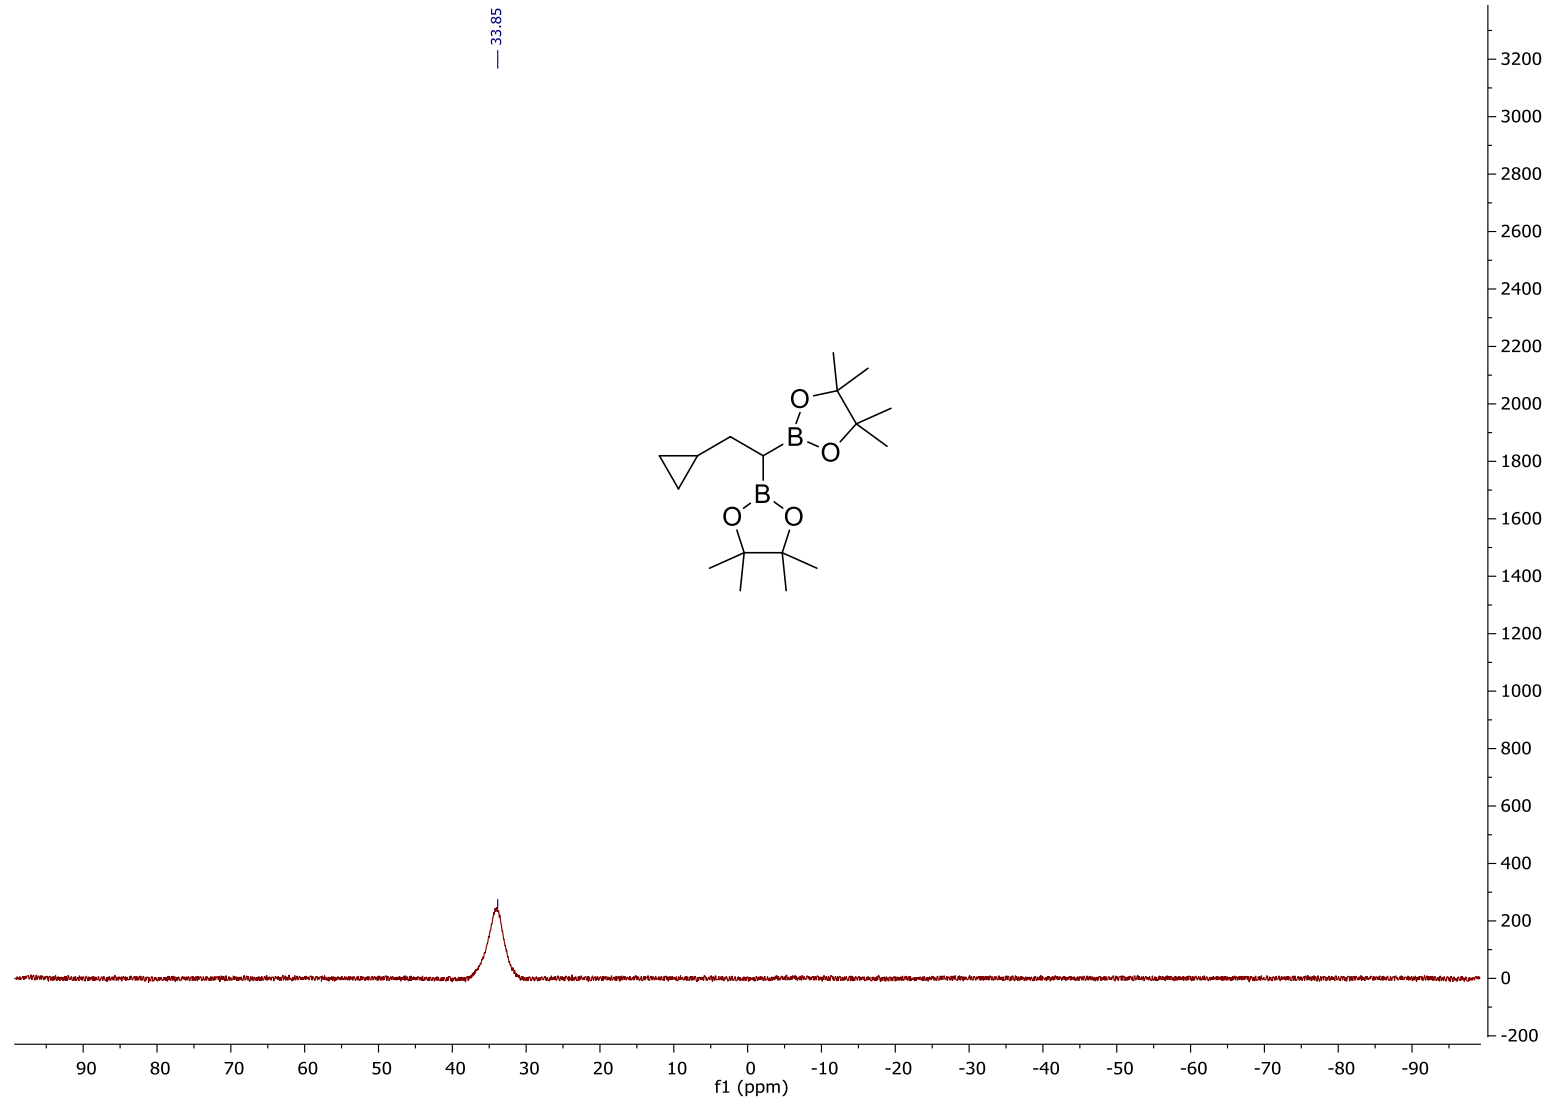

<sup>1</sup>H NMR, compound 2j

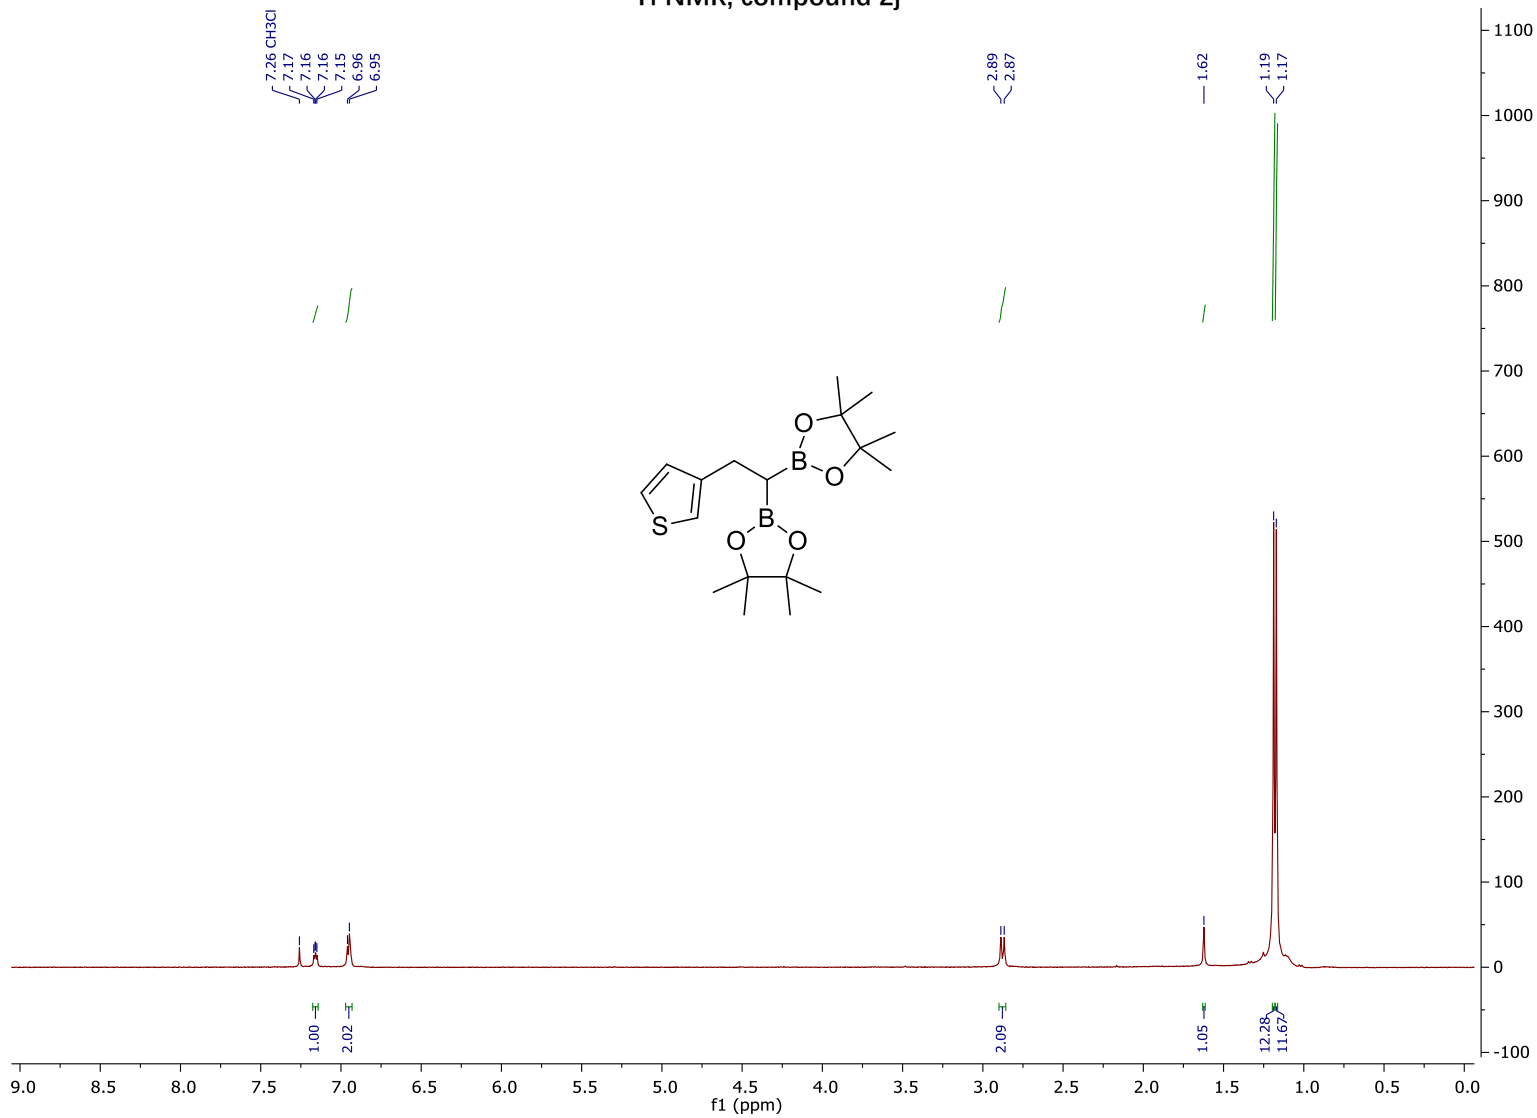

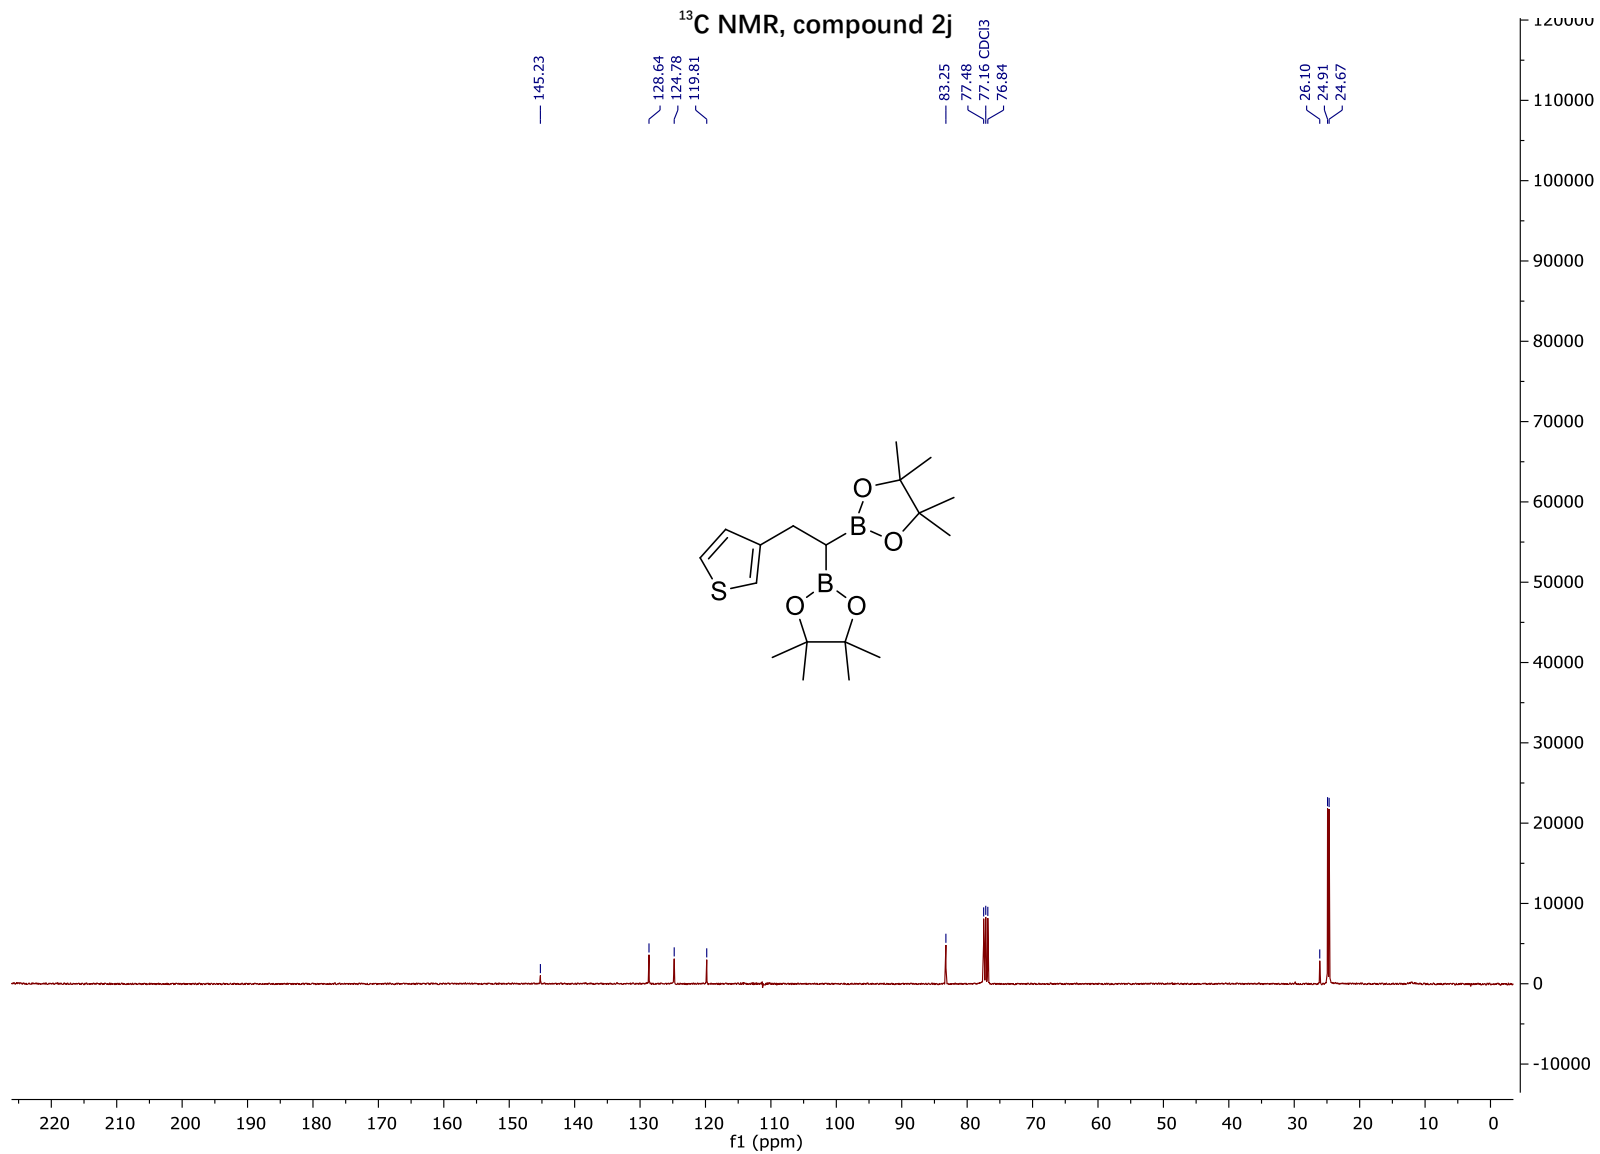



<sup>11</sup>B NMR, compound 2j

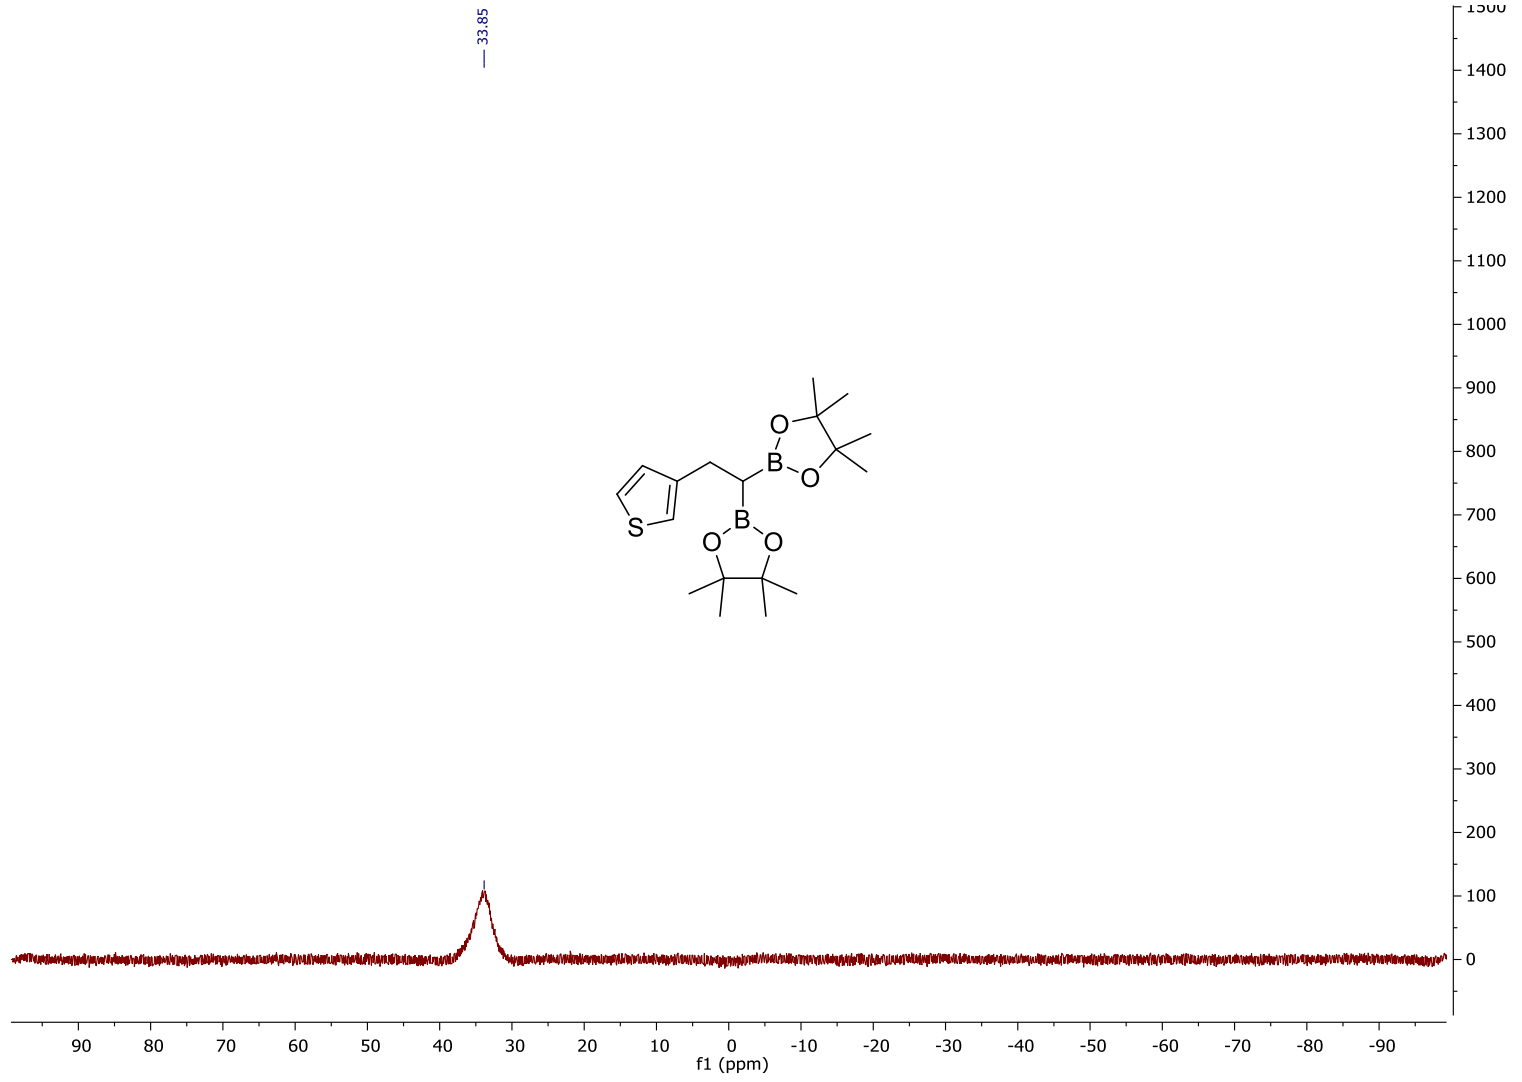

<sup>1</sup>H NMR, compound 2k

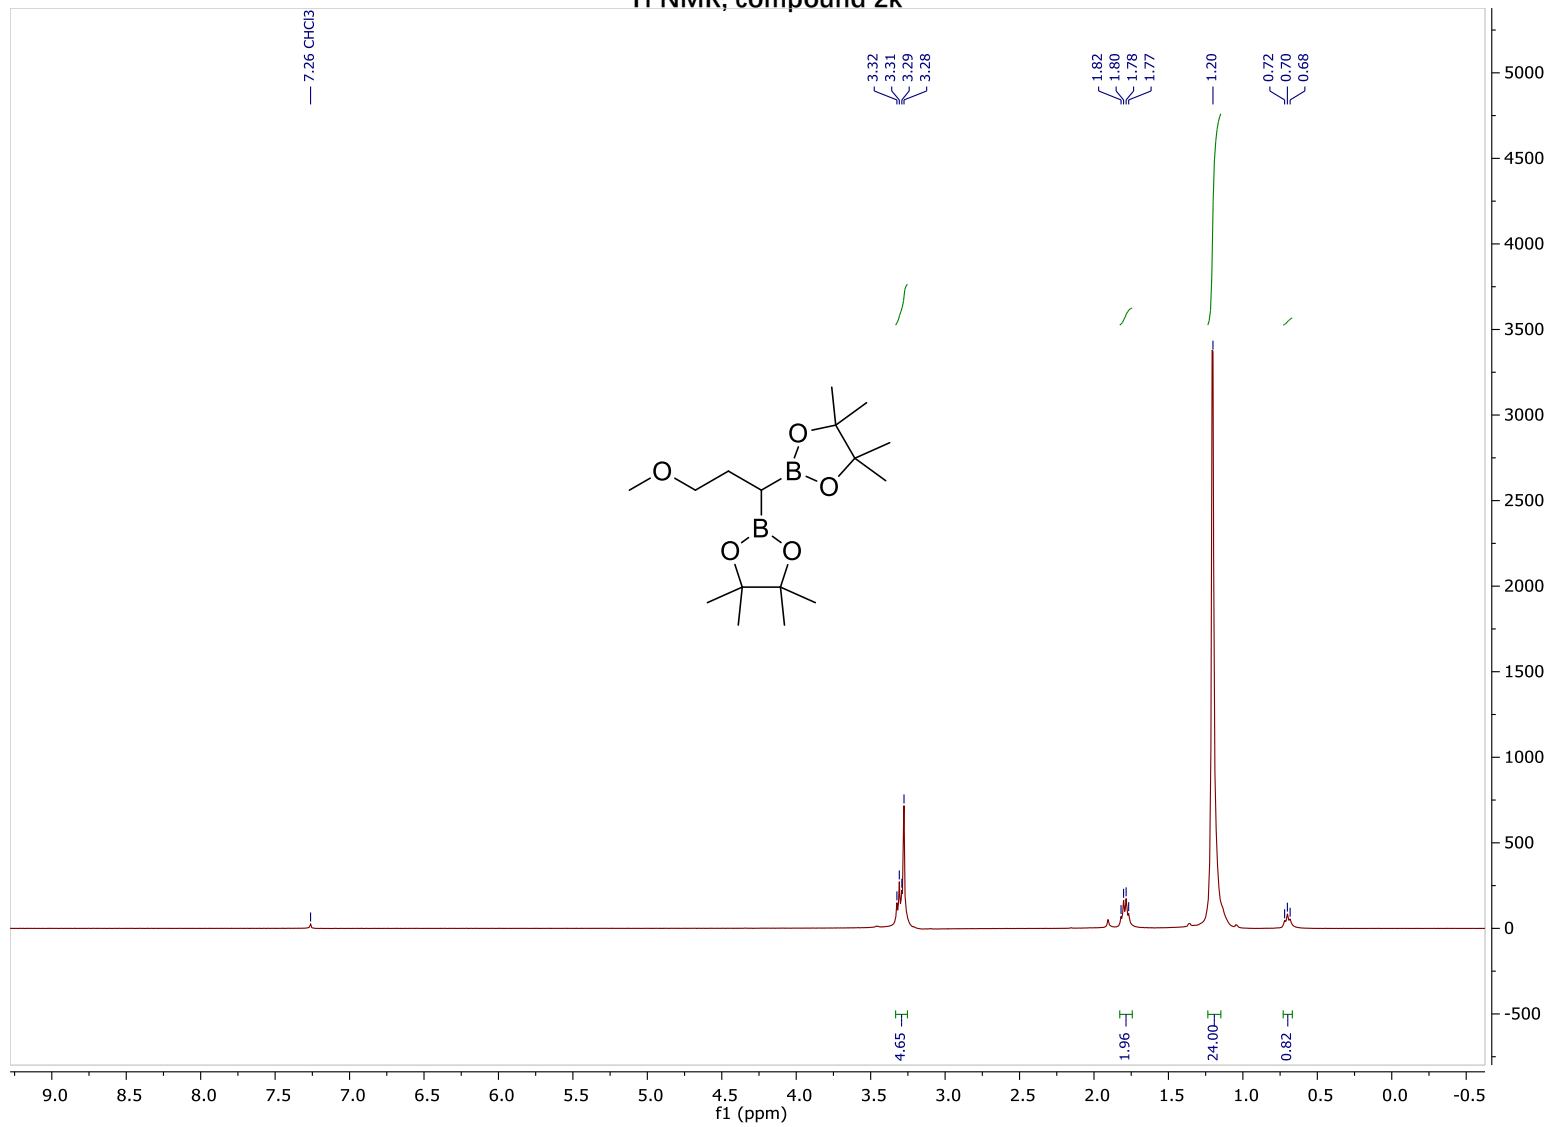

<sup>13</sup>C NMR, compound 2k

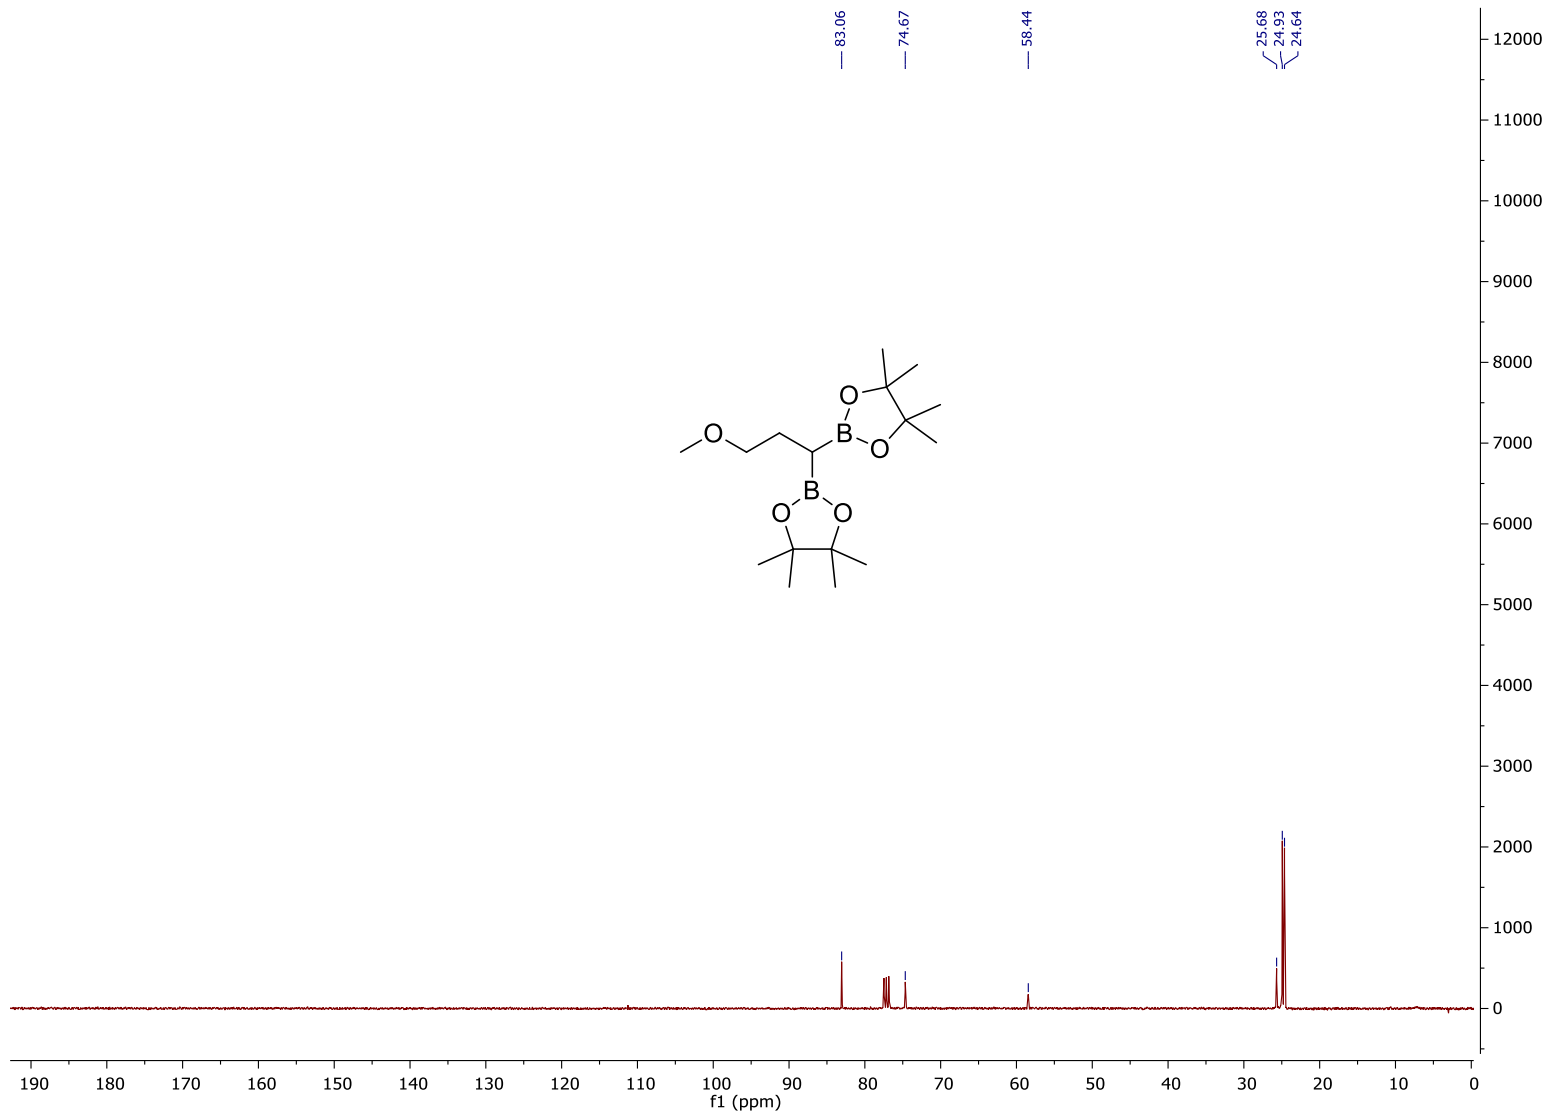

<sup>11</sup>B NMR, compound 2k

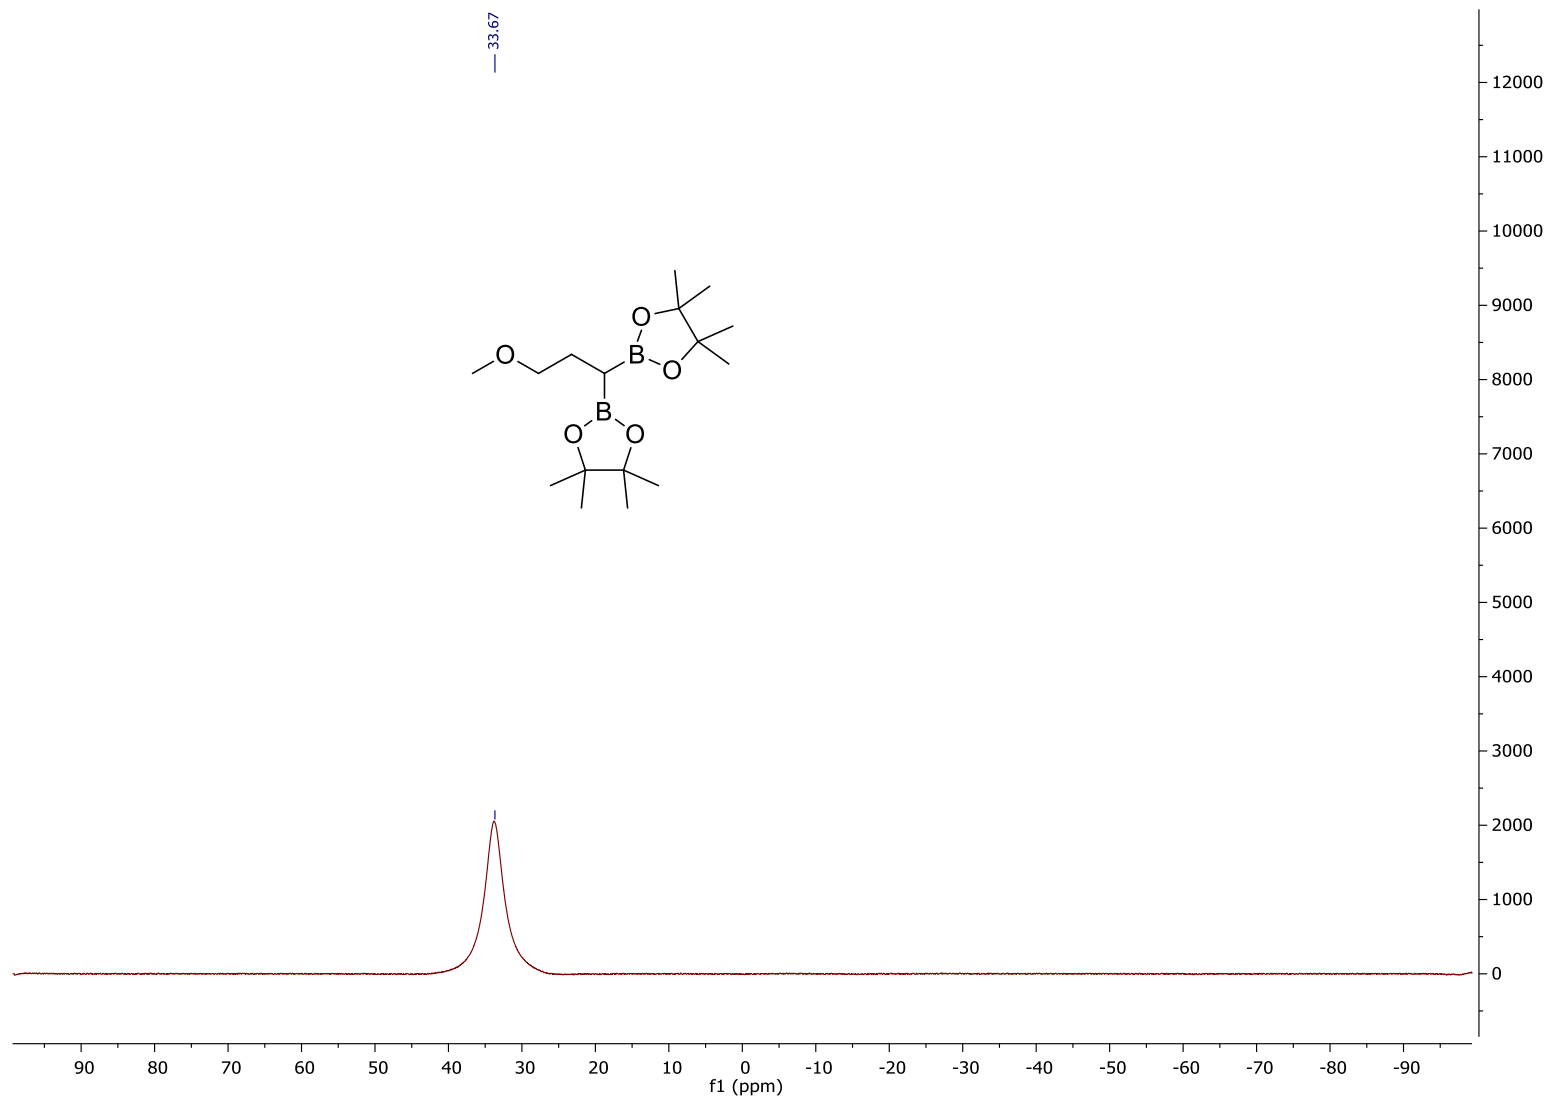

<sup>1</sup>H NMR, compound 2I

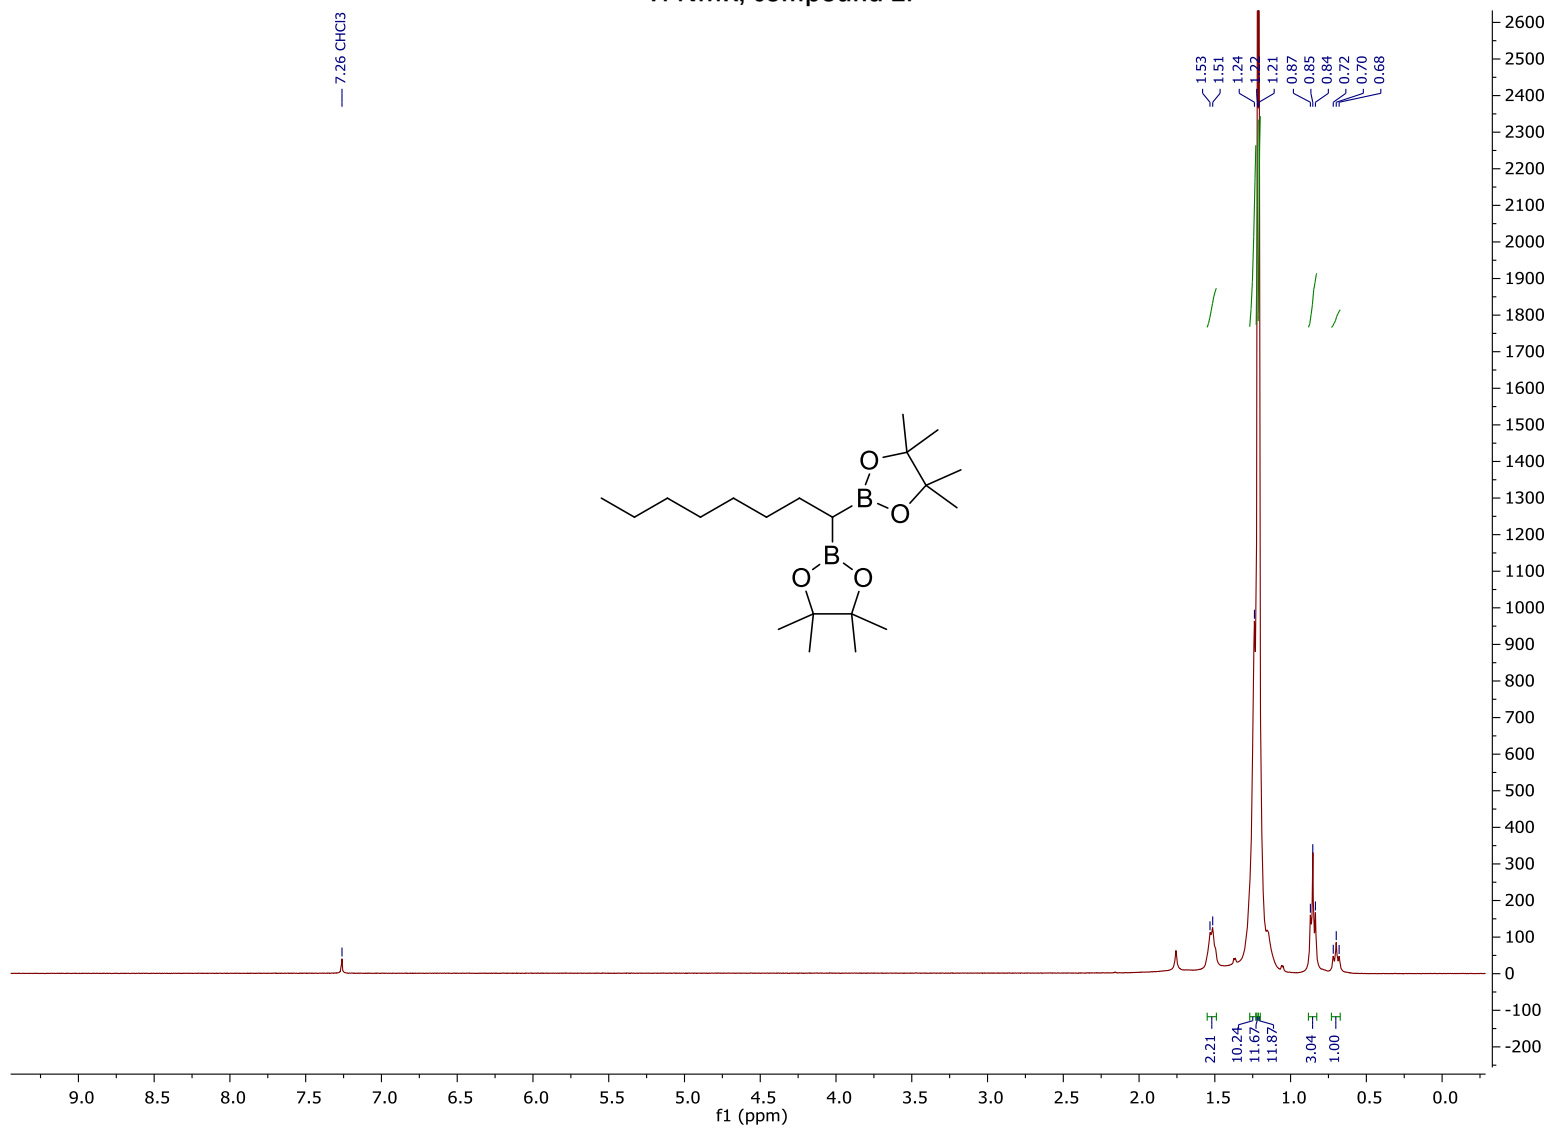

<sup>13</sup>C NMR, compound 2I

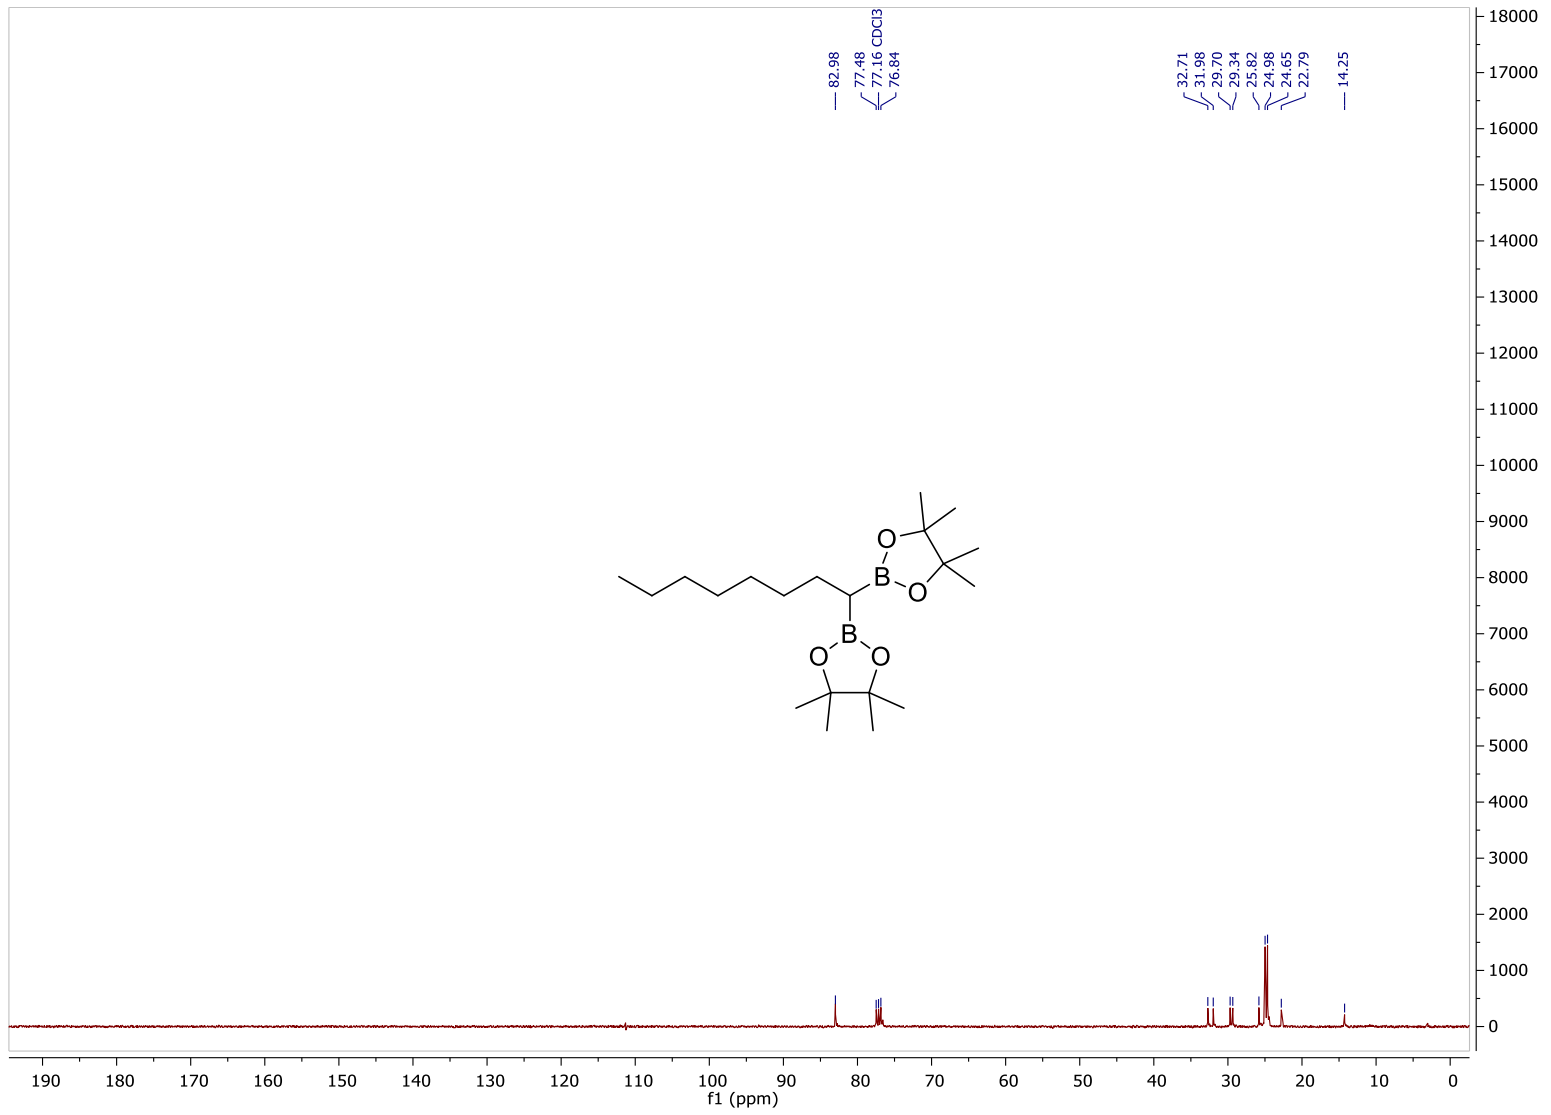

<sup>11</sup>B NMR, compound 2I

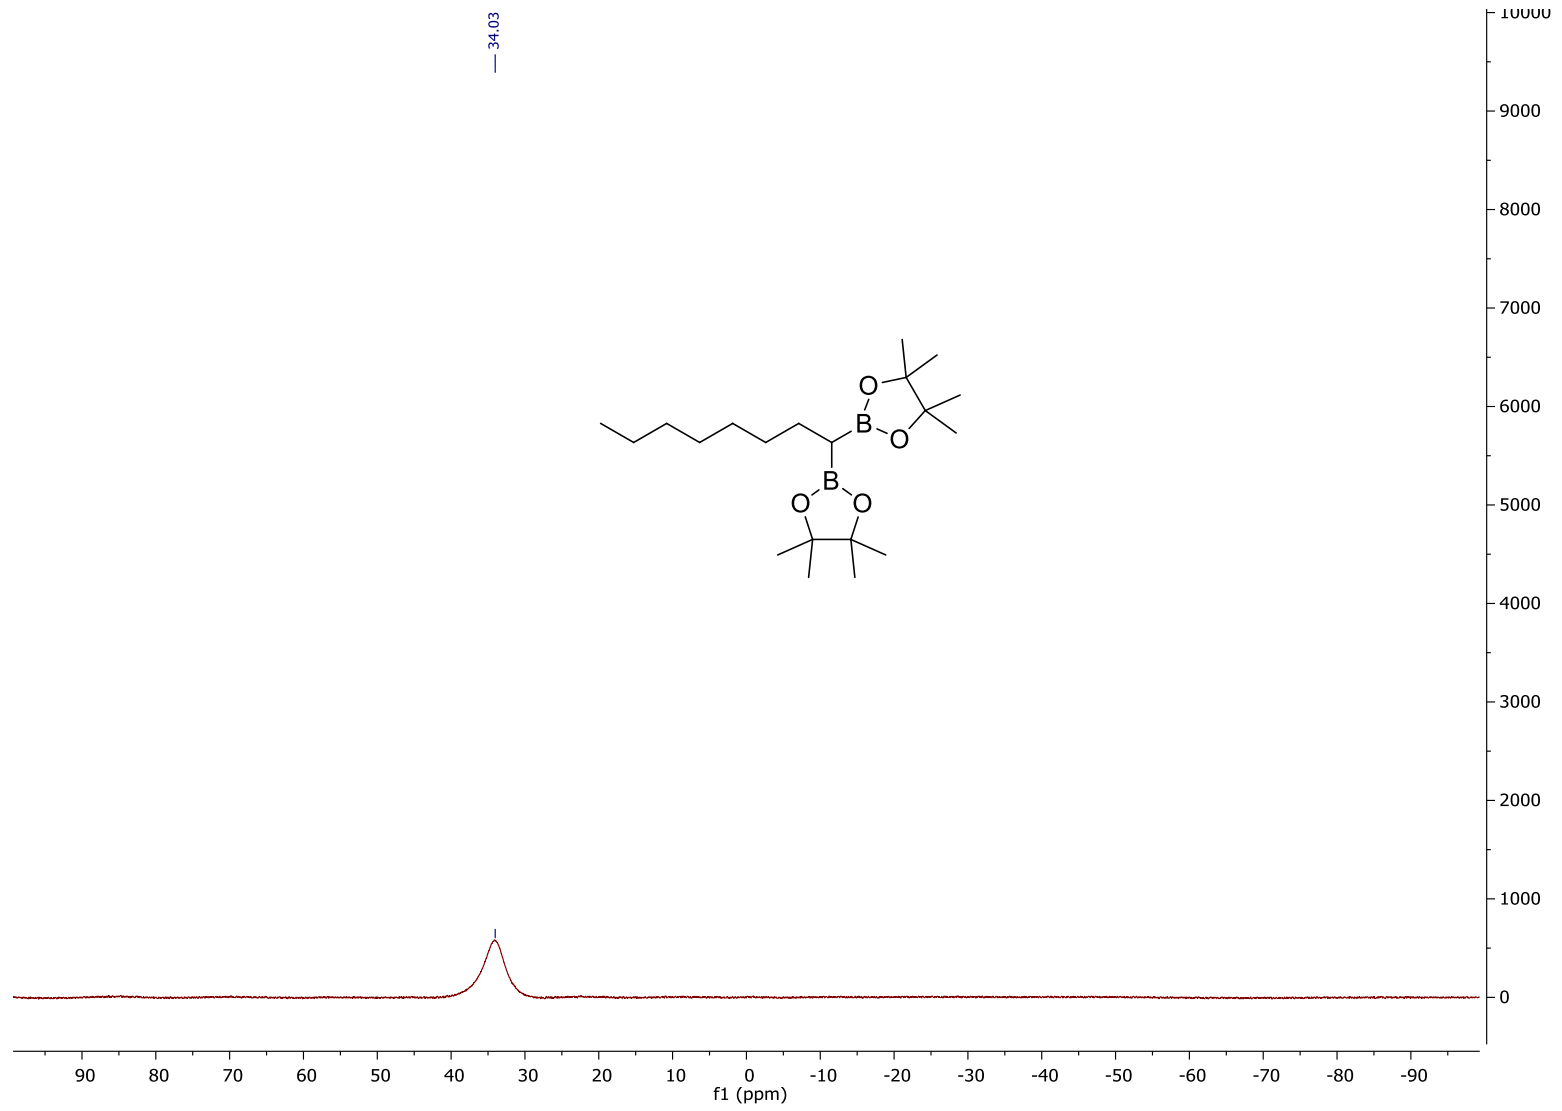

<sup>1</sup>H NMR, compound 2m

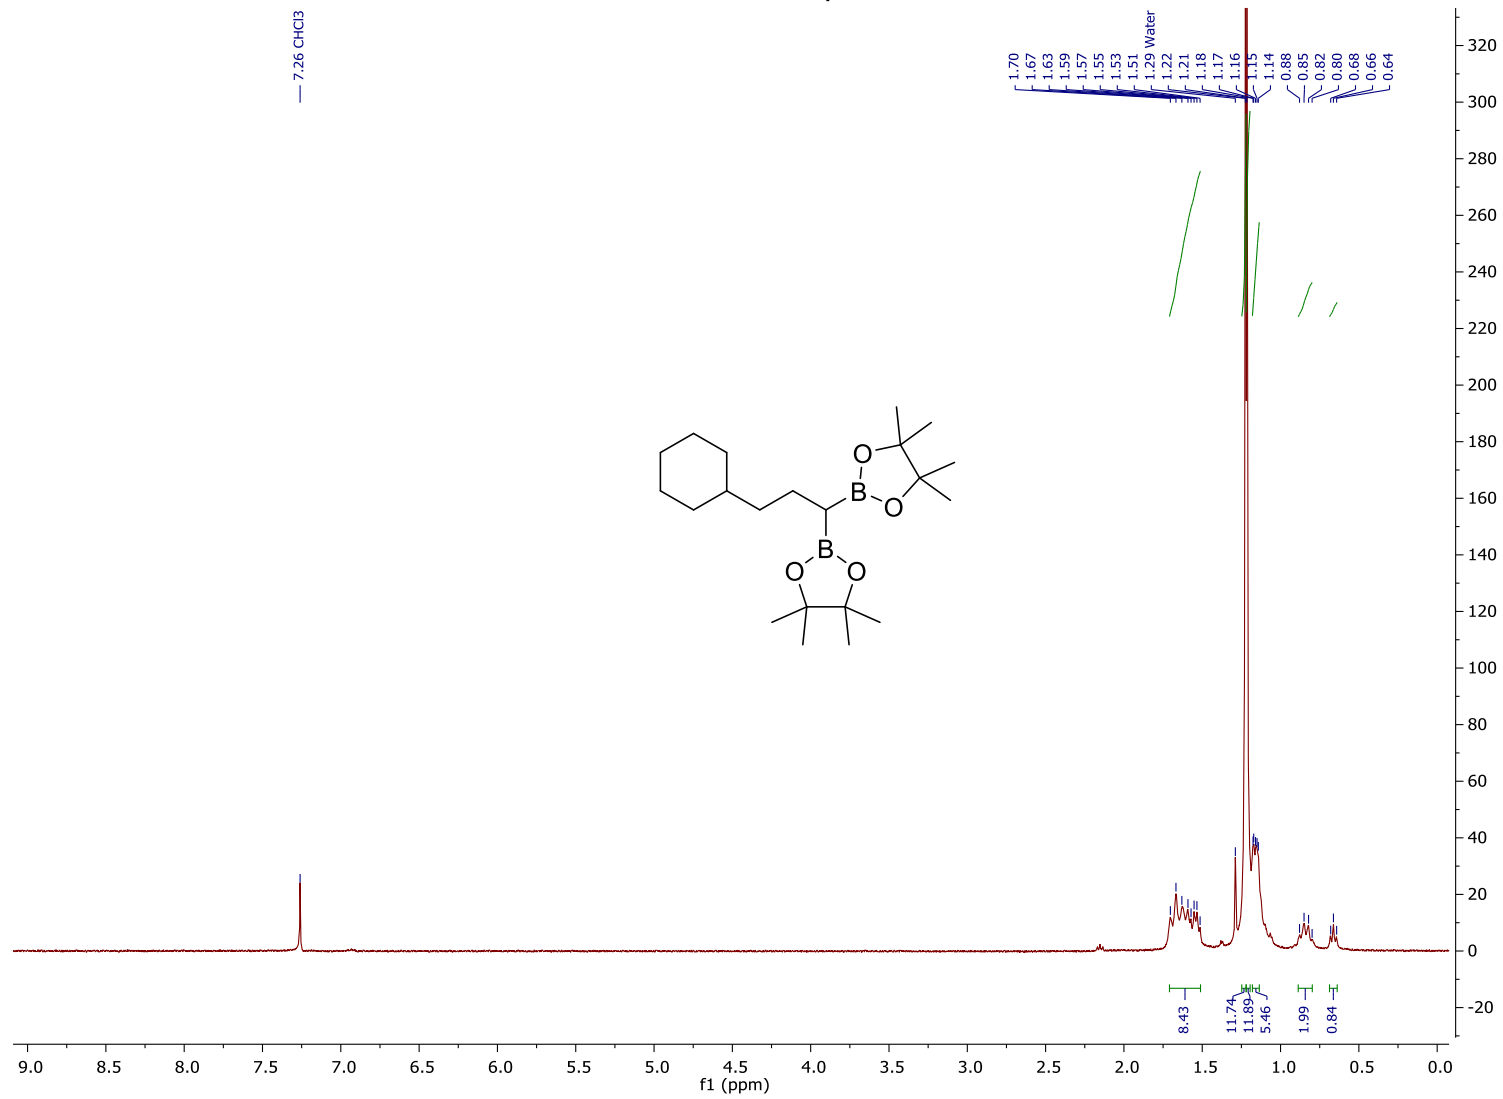



<sup>13</sup>C NMR, compound 2m

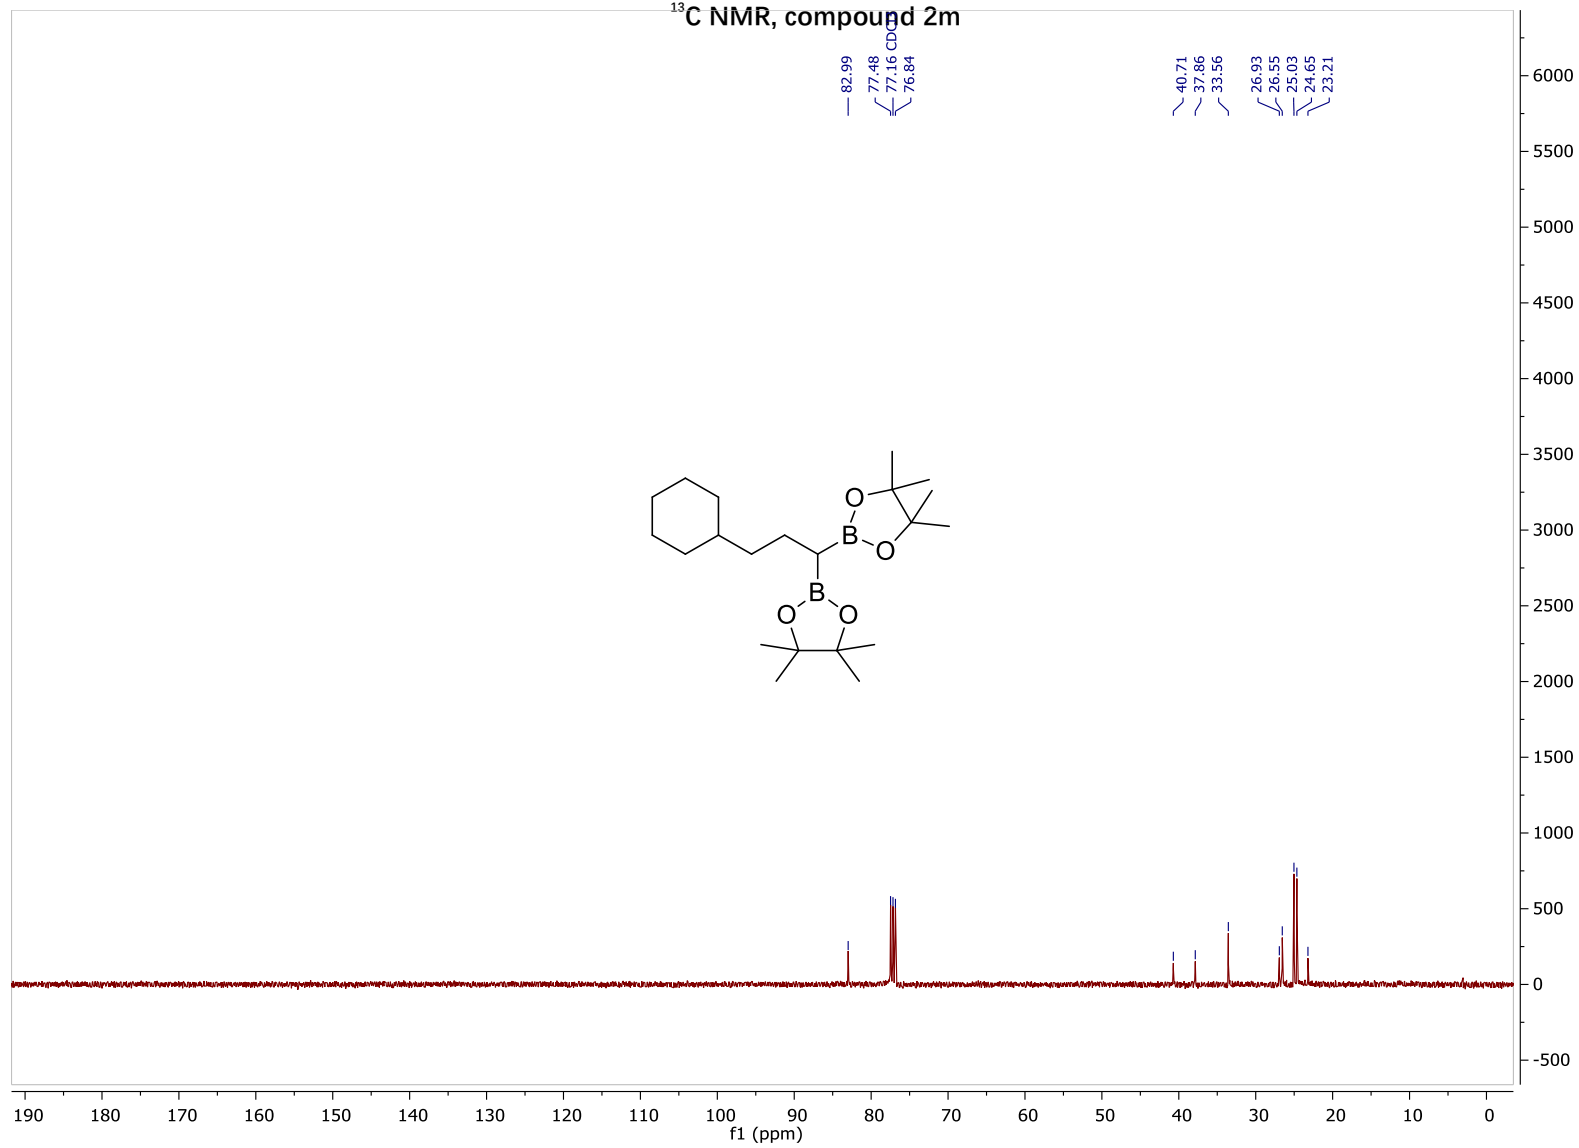

<sup>11</sup>B NMR, compound 2m

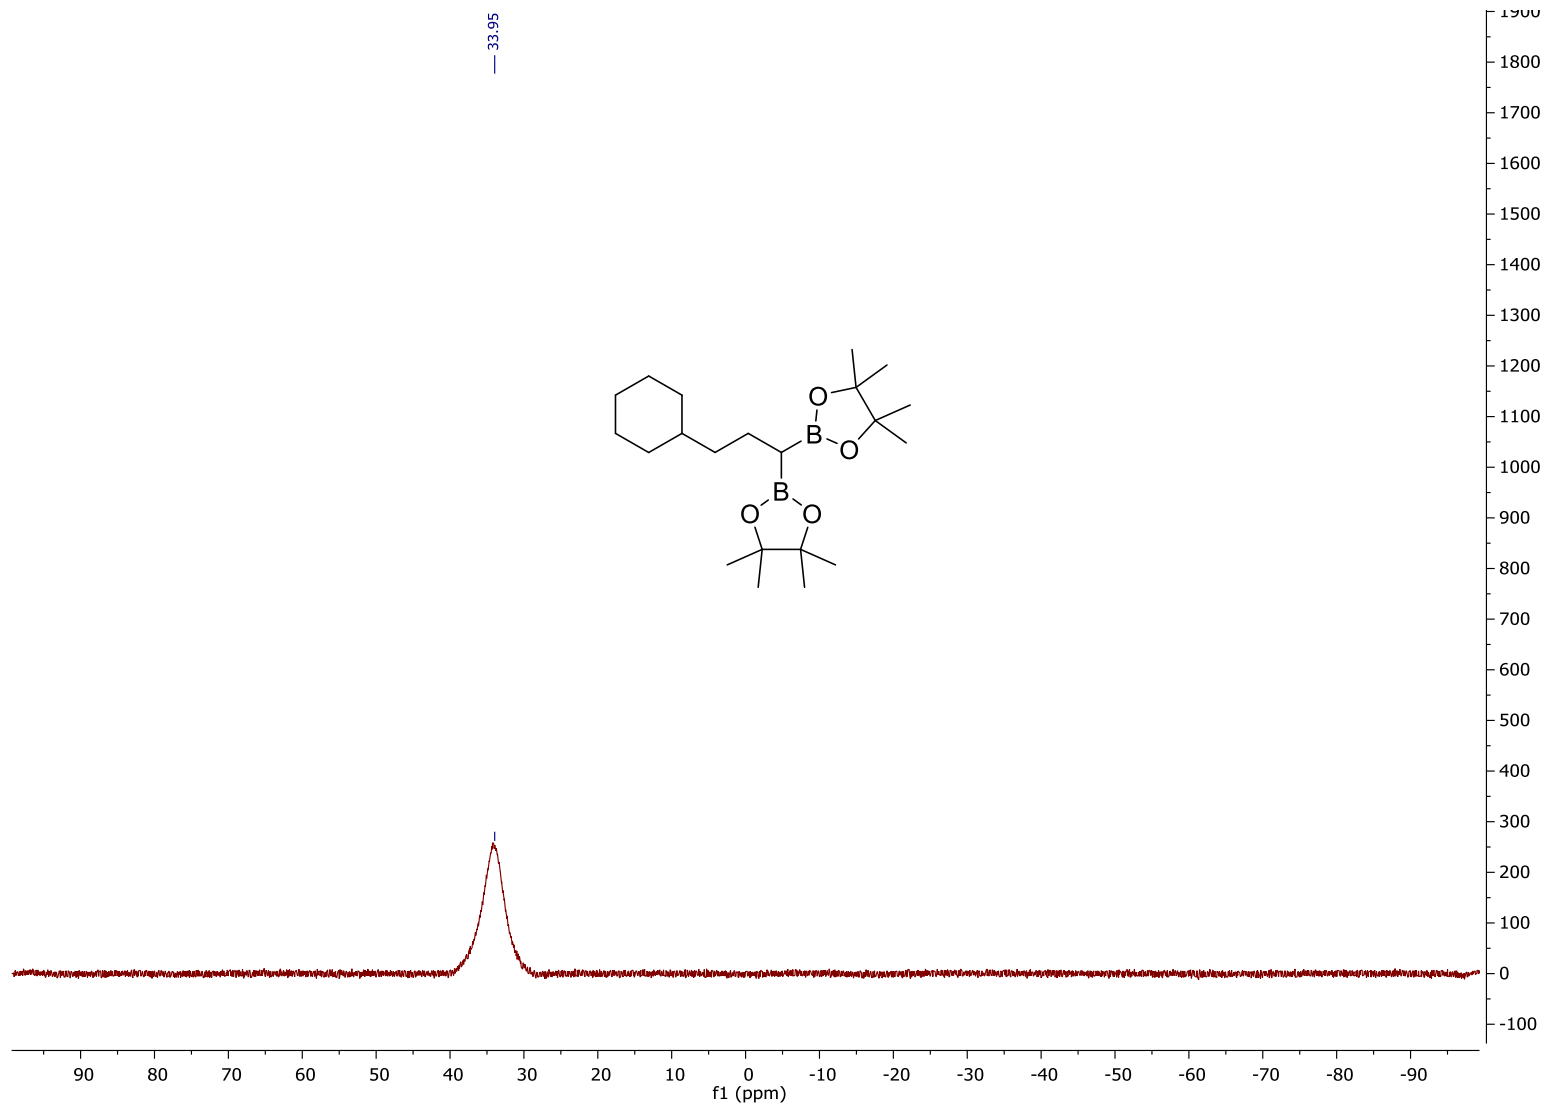

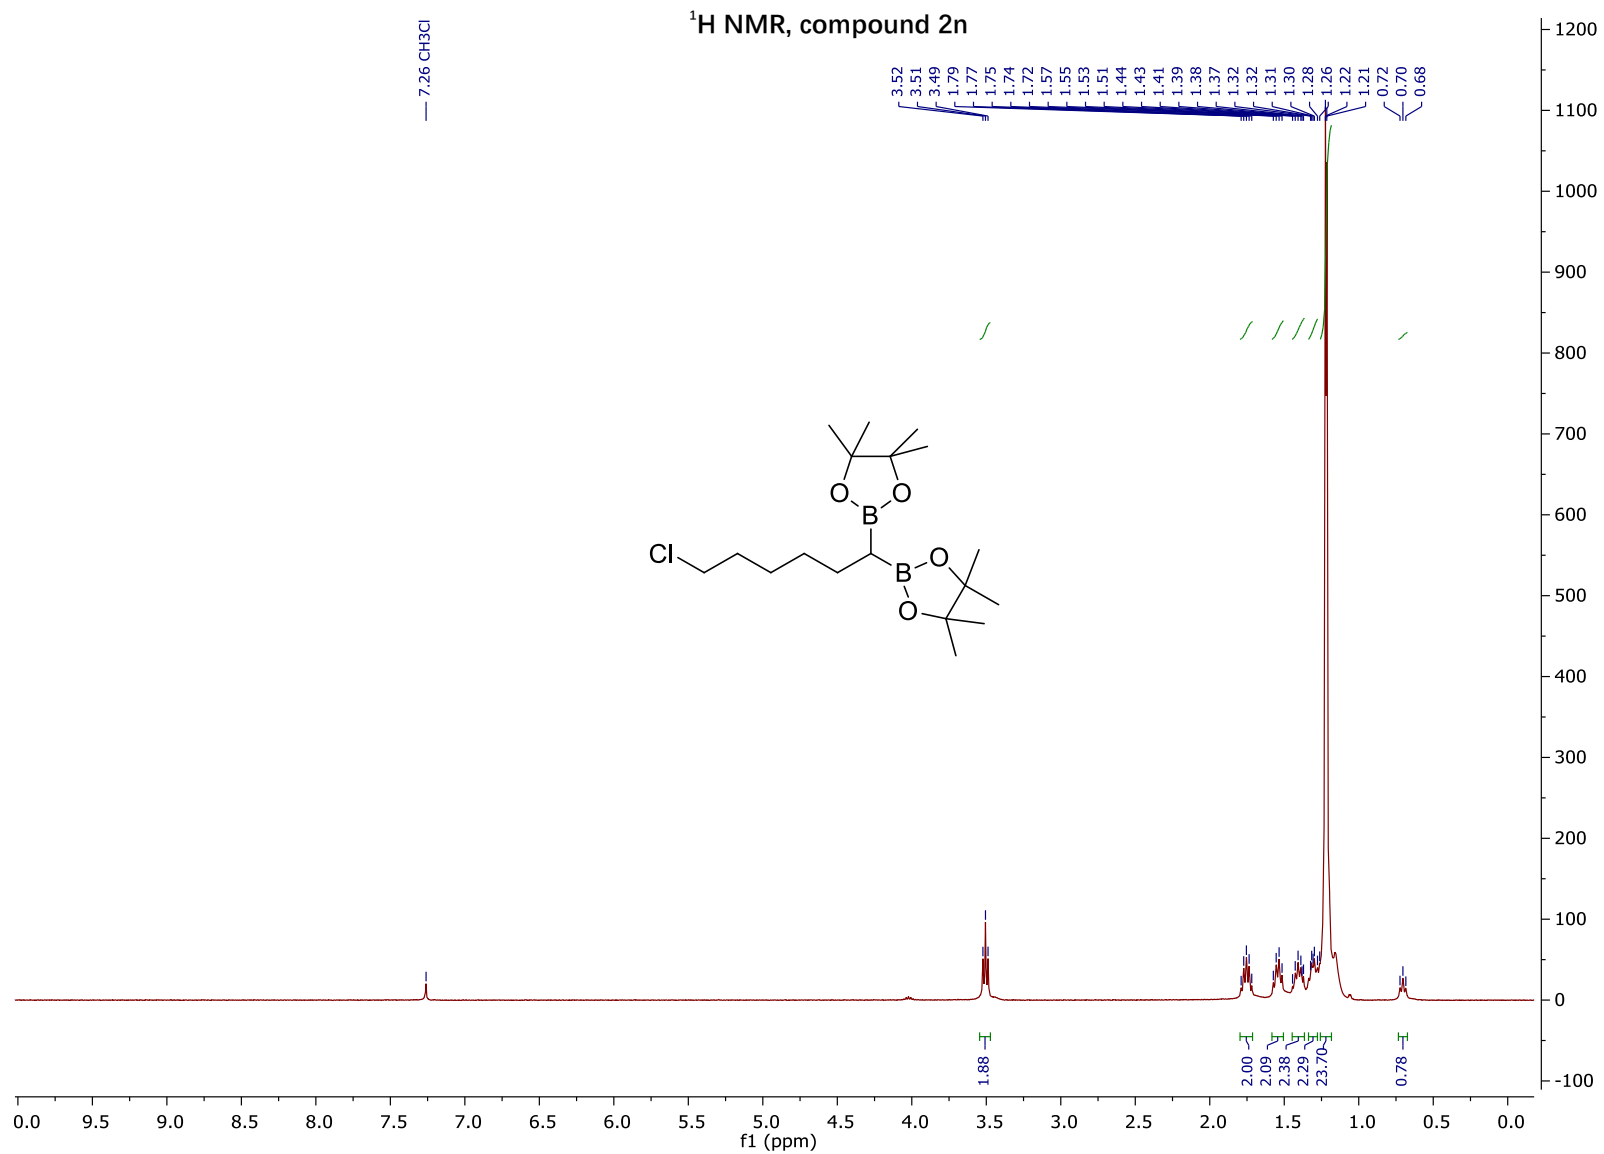

<sup>13</sup>C NMR, compound 2n

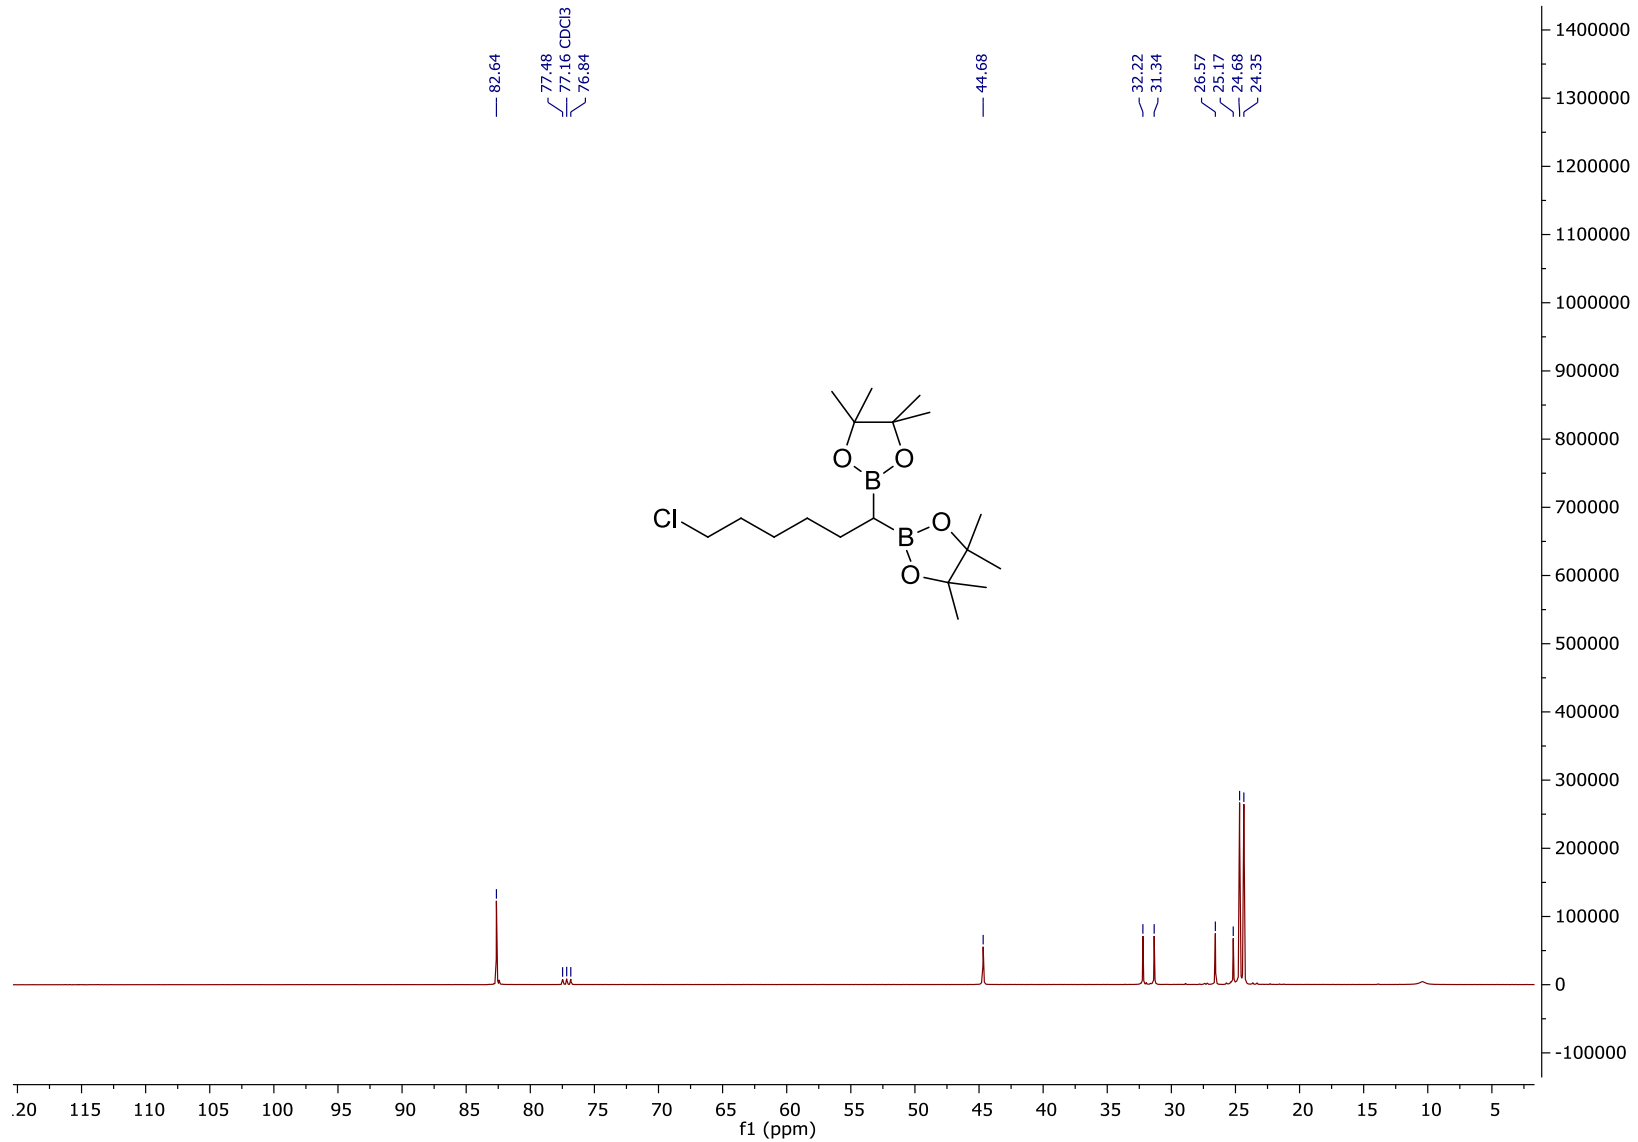

<sup>11</sup>B NMR, compound 2n

— 33.67

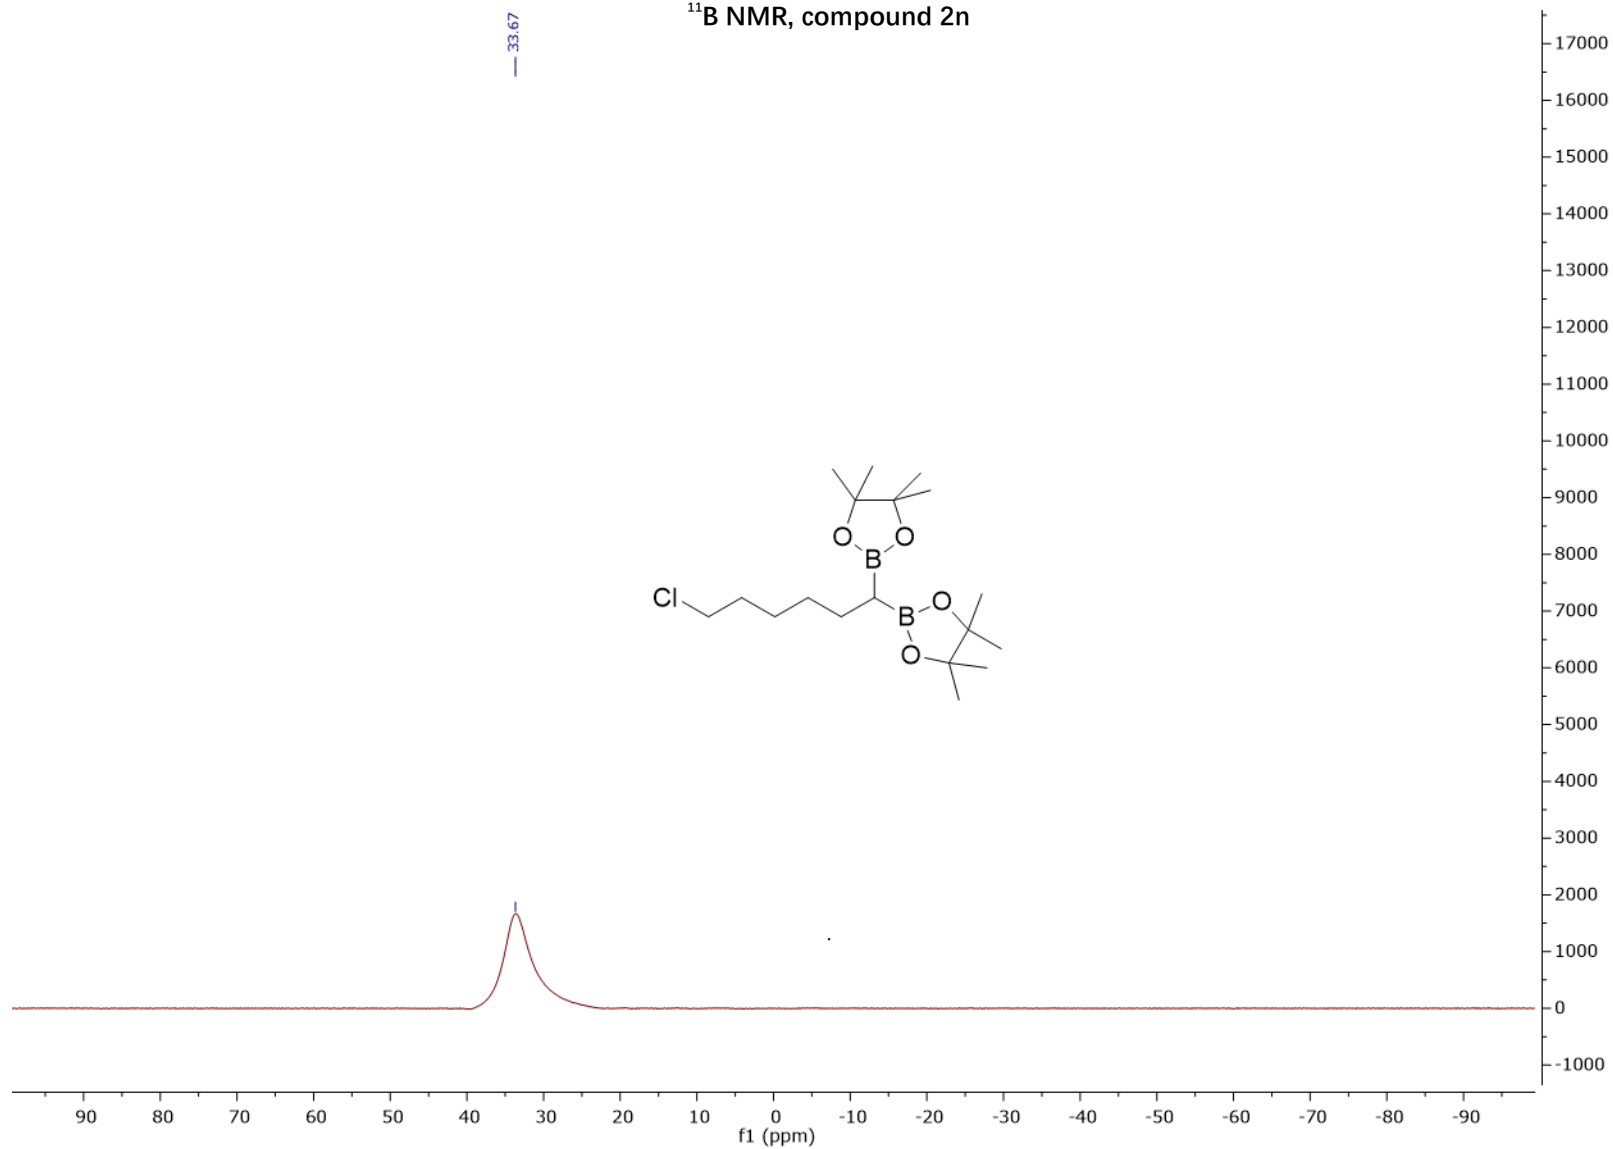



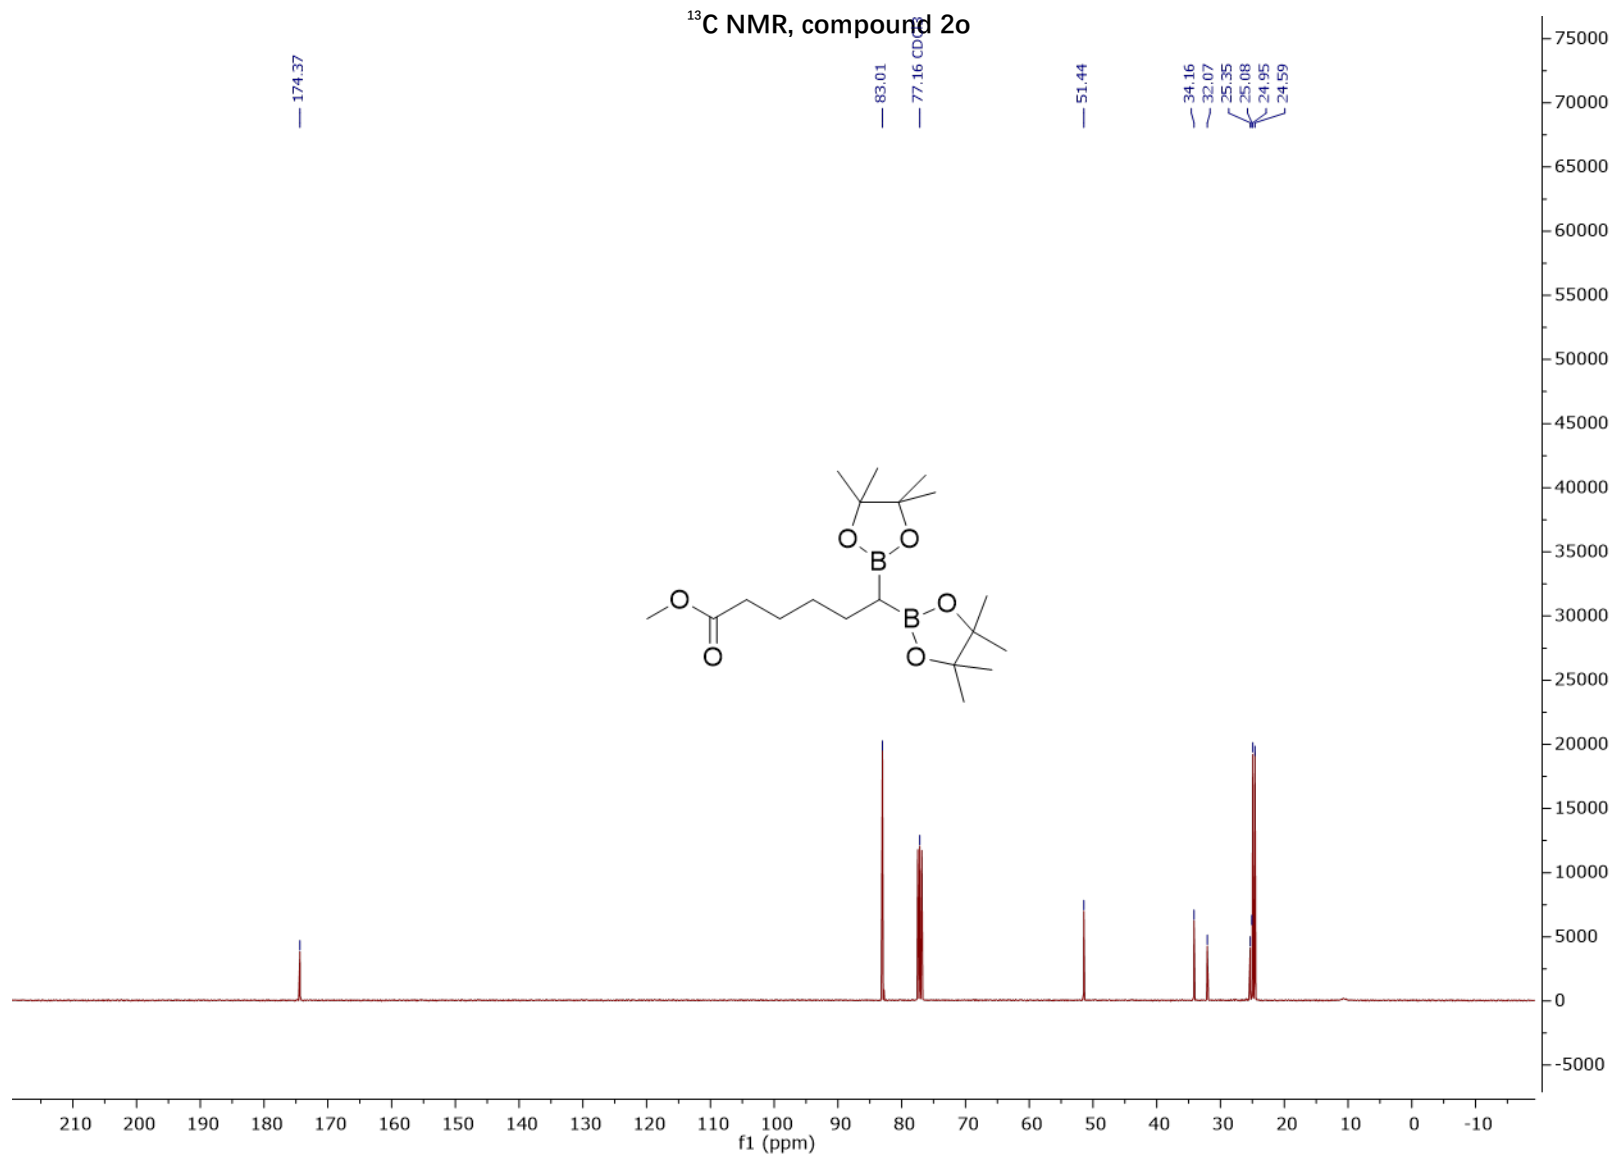

<sup>11</sup>B NMR, compound 2o

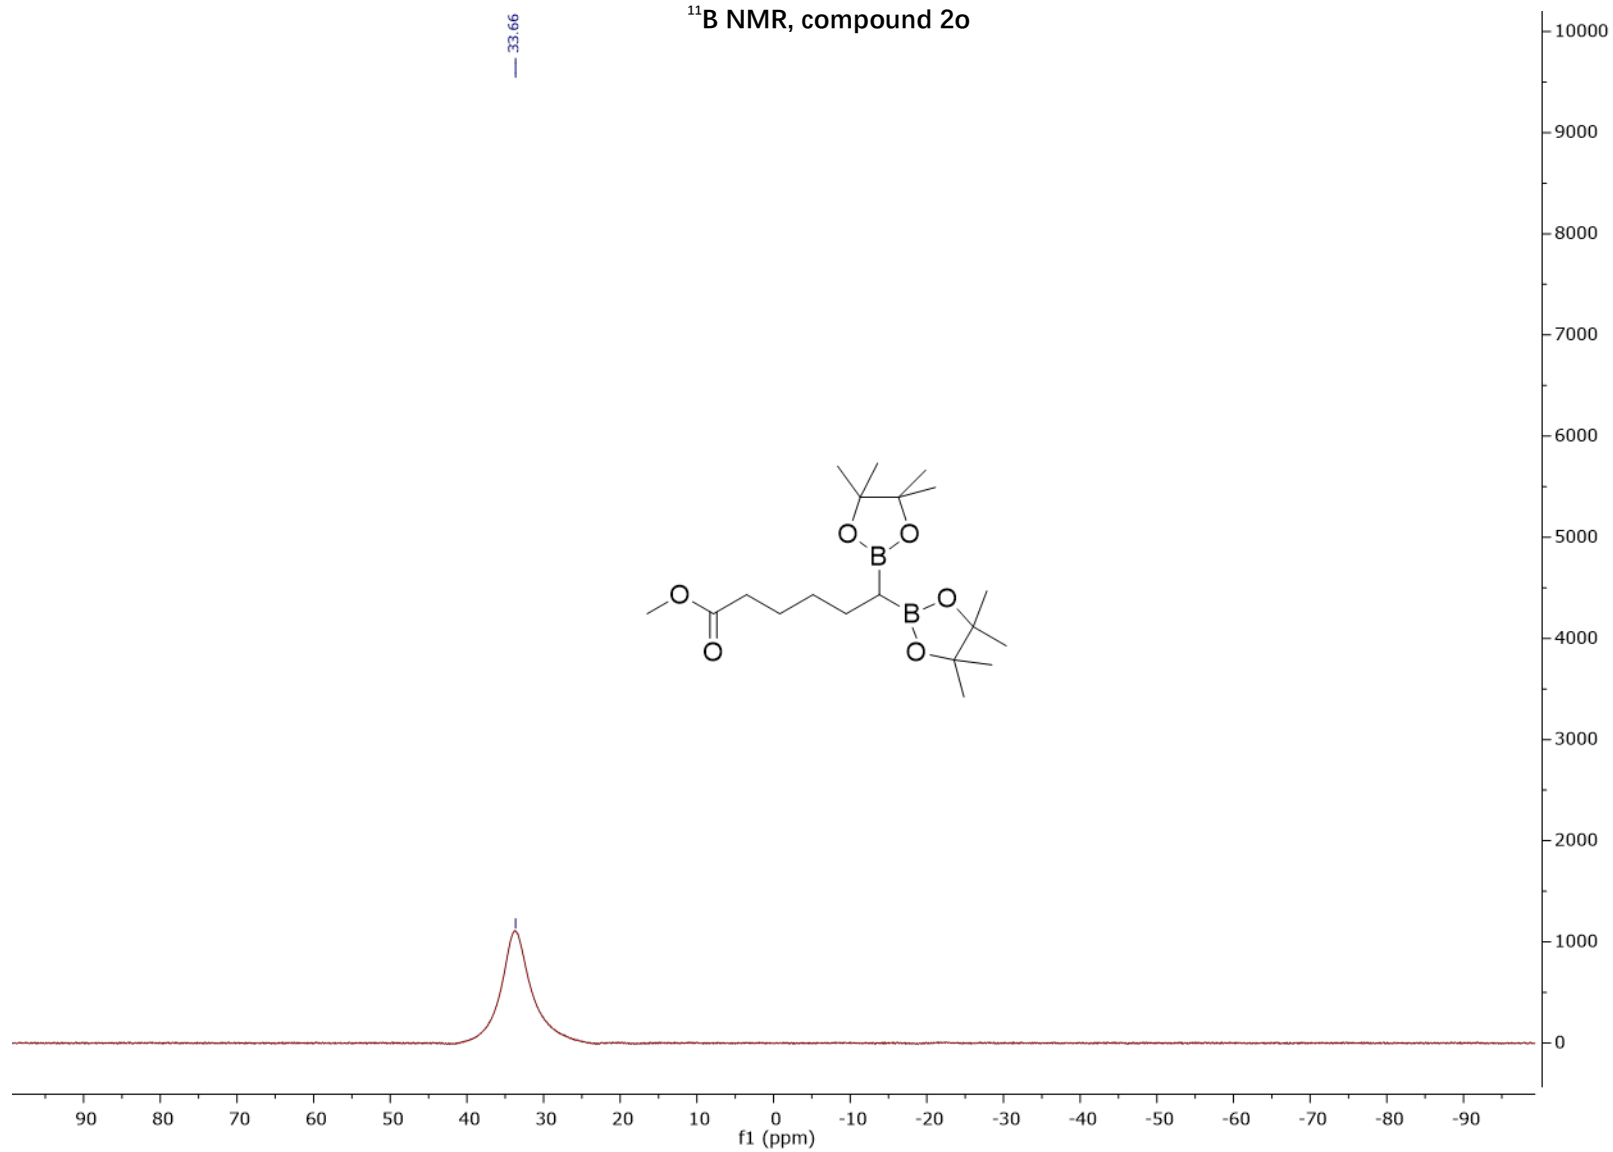



<sup>1</sup>H NMR, compound 2p

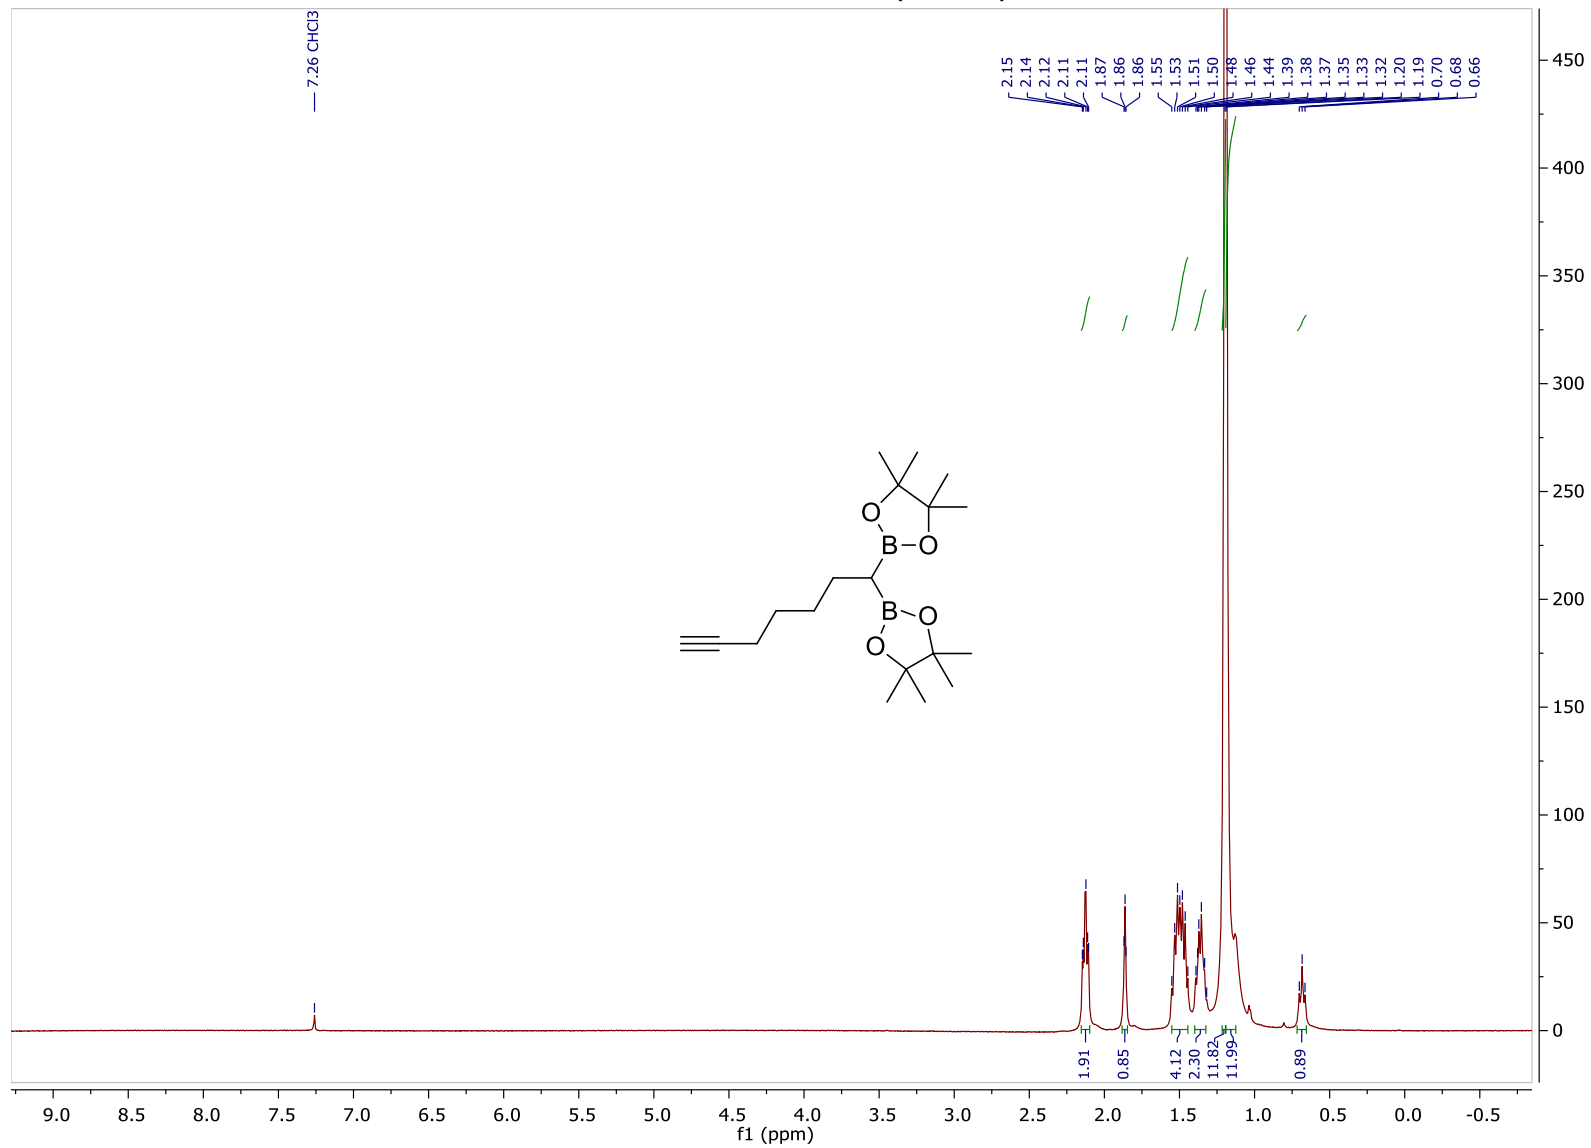

<sup>13</sup>C NMR, compound 2p

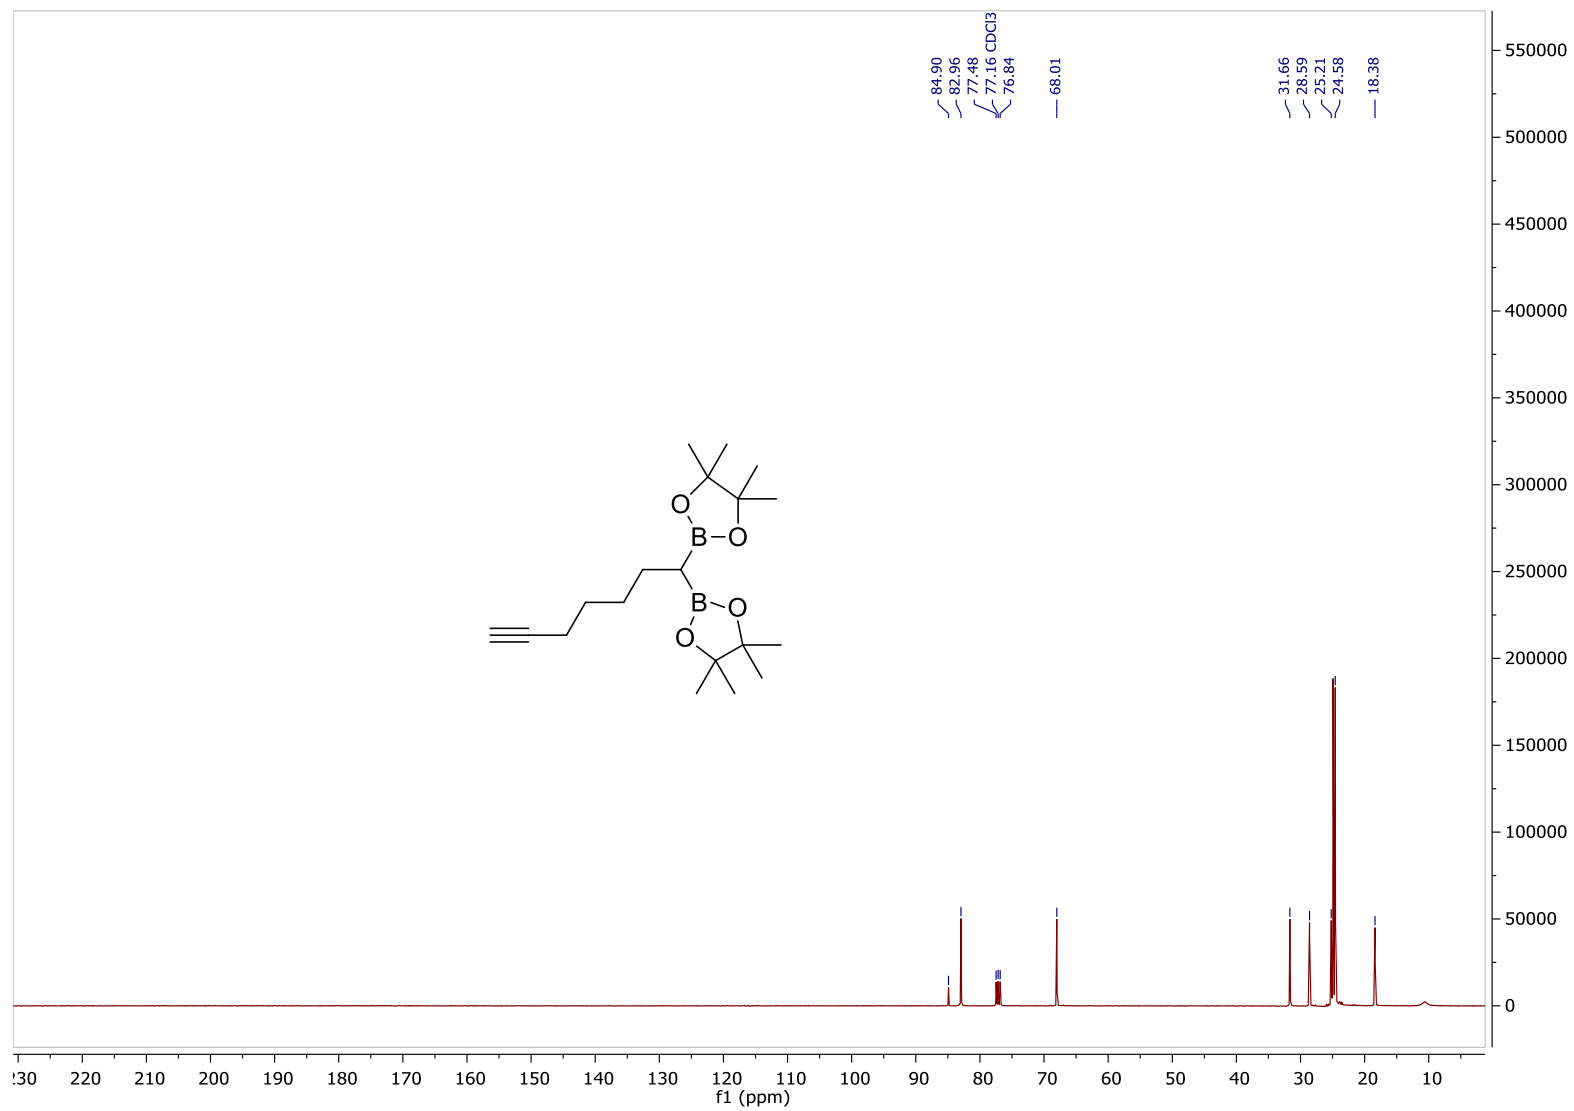

<sup>11</sup>B NMR, compound 2p

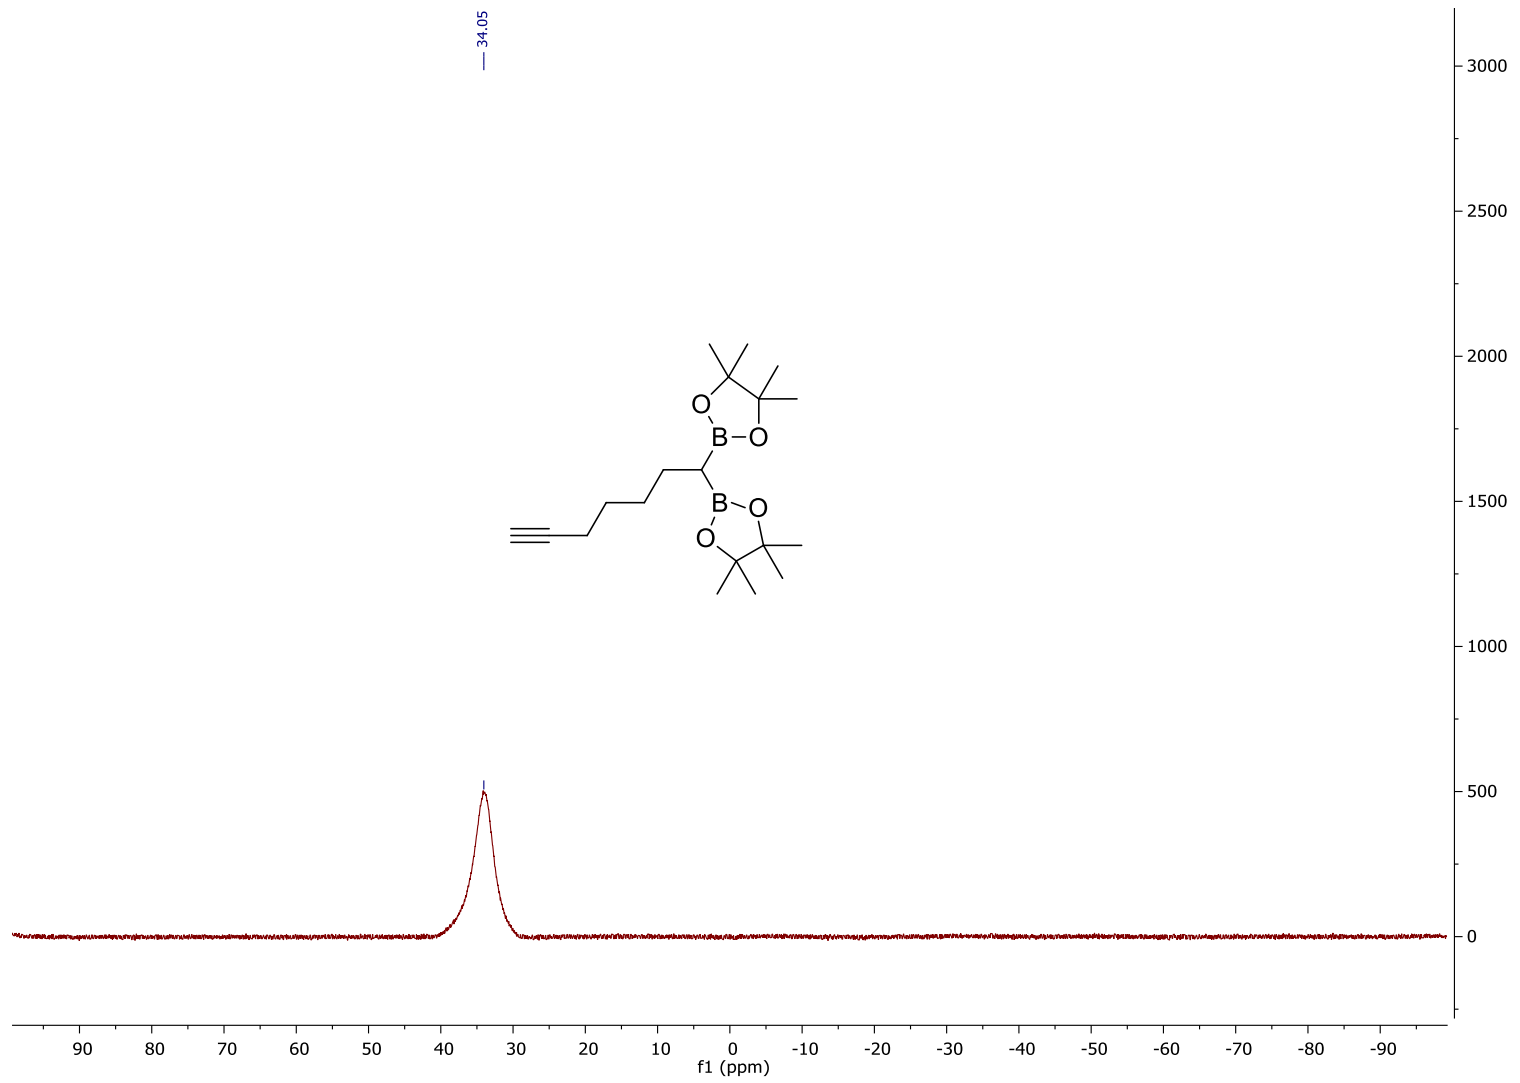

<sup>1</sup>H NMR, compound 2q

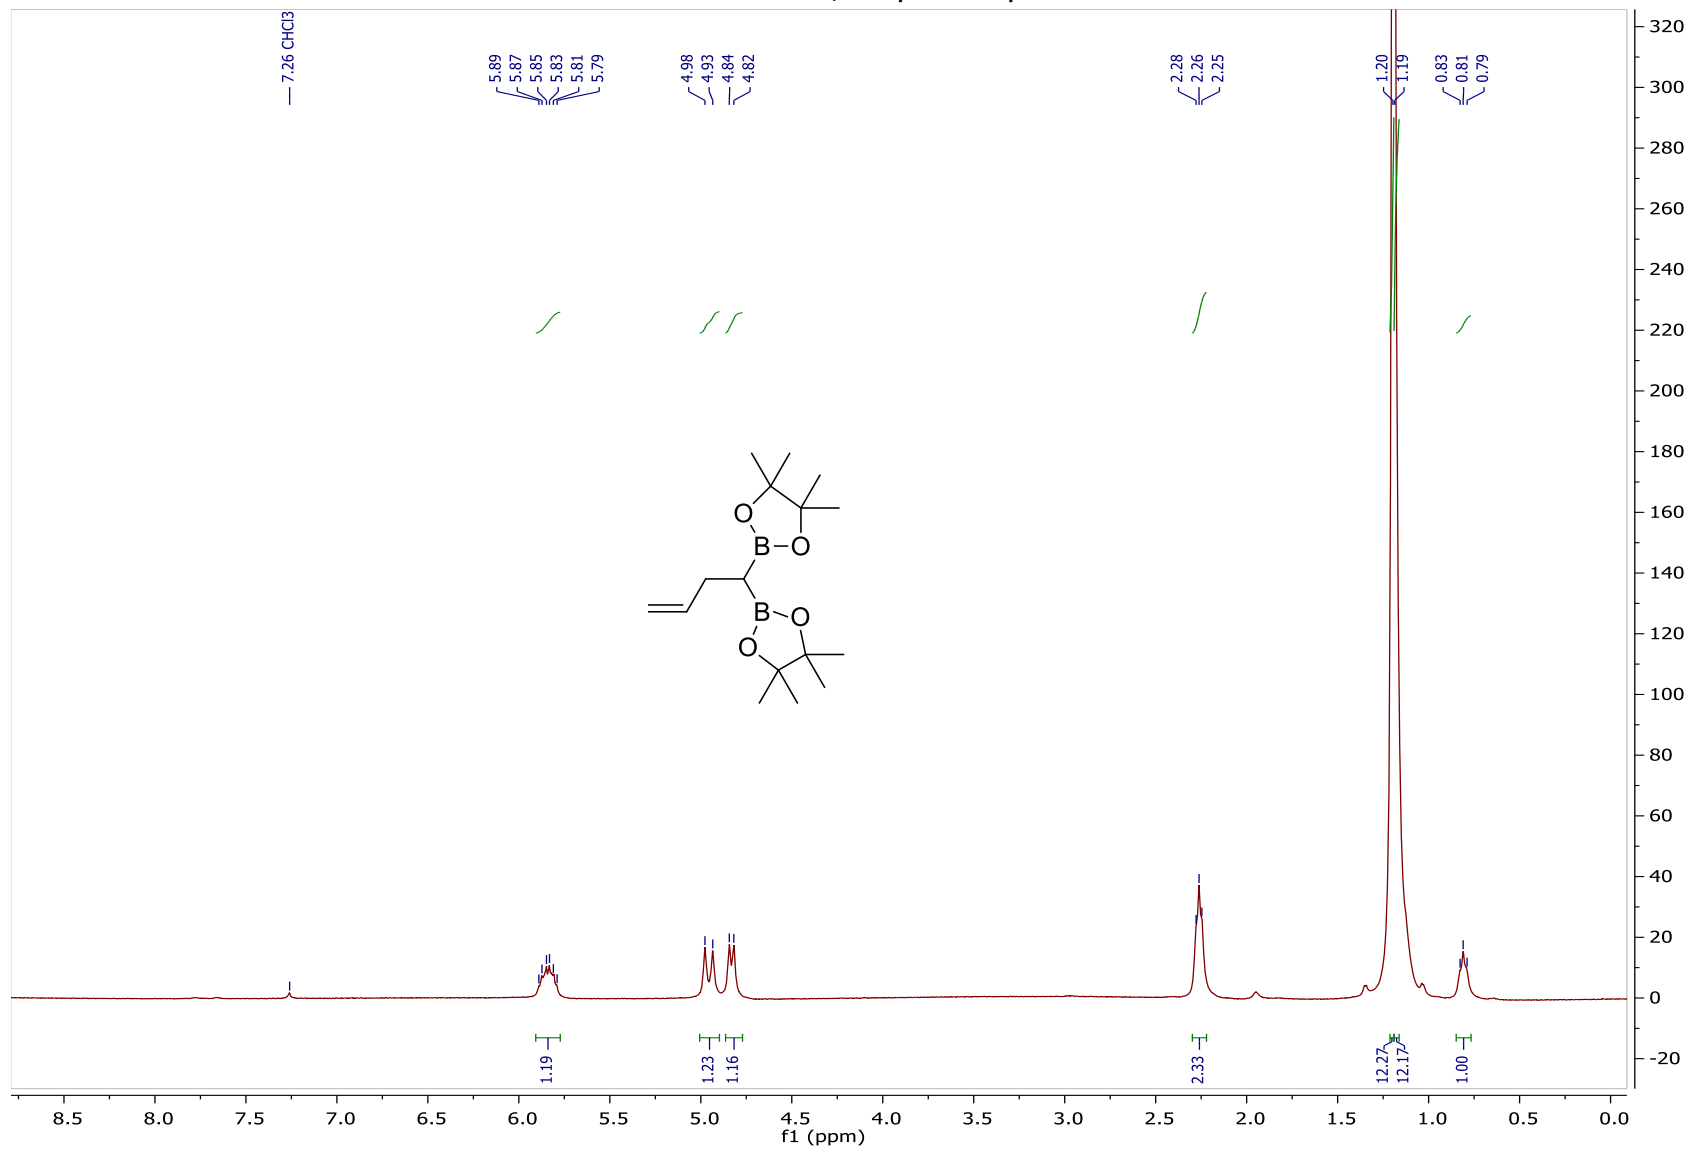

<sup>13</sup>C NMR, compound 2q

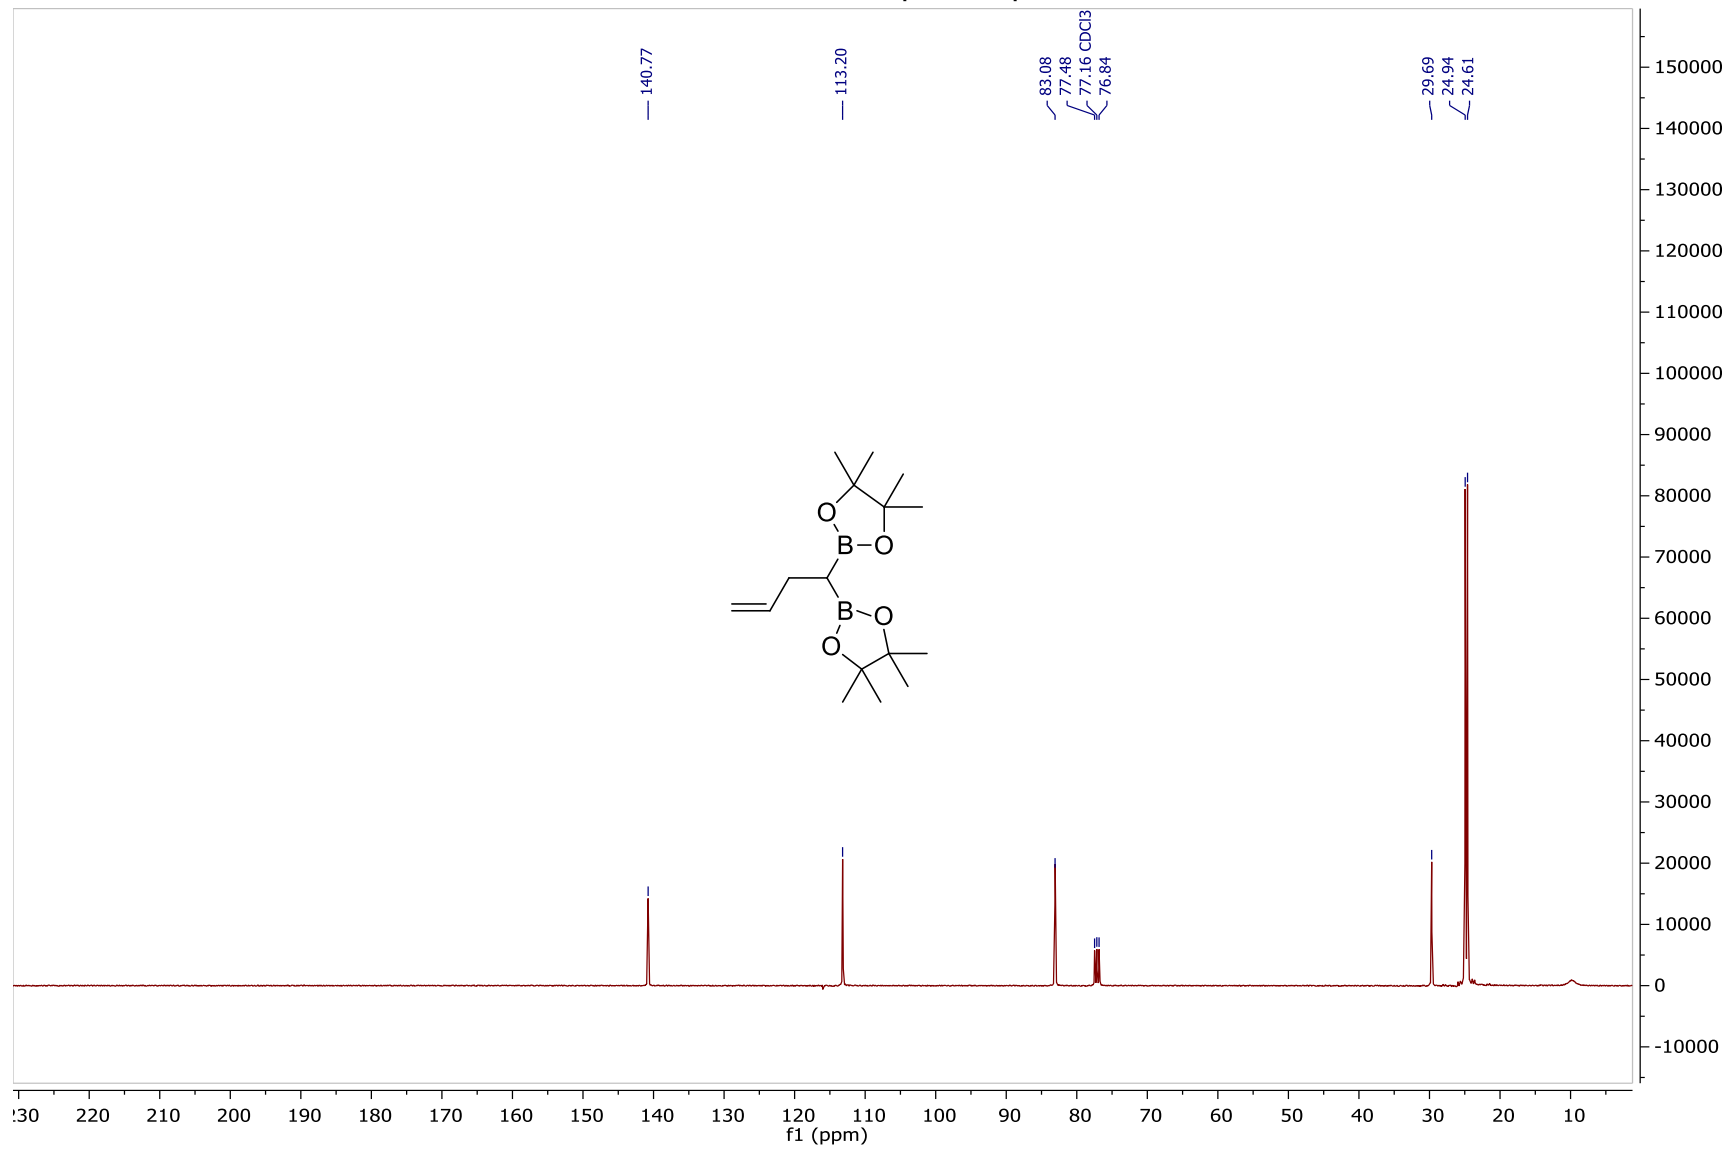

<sup>11</sup>B NMR, compound 2q

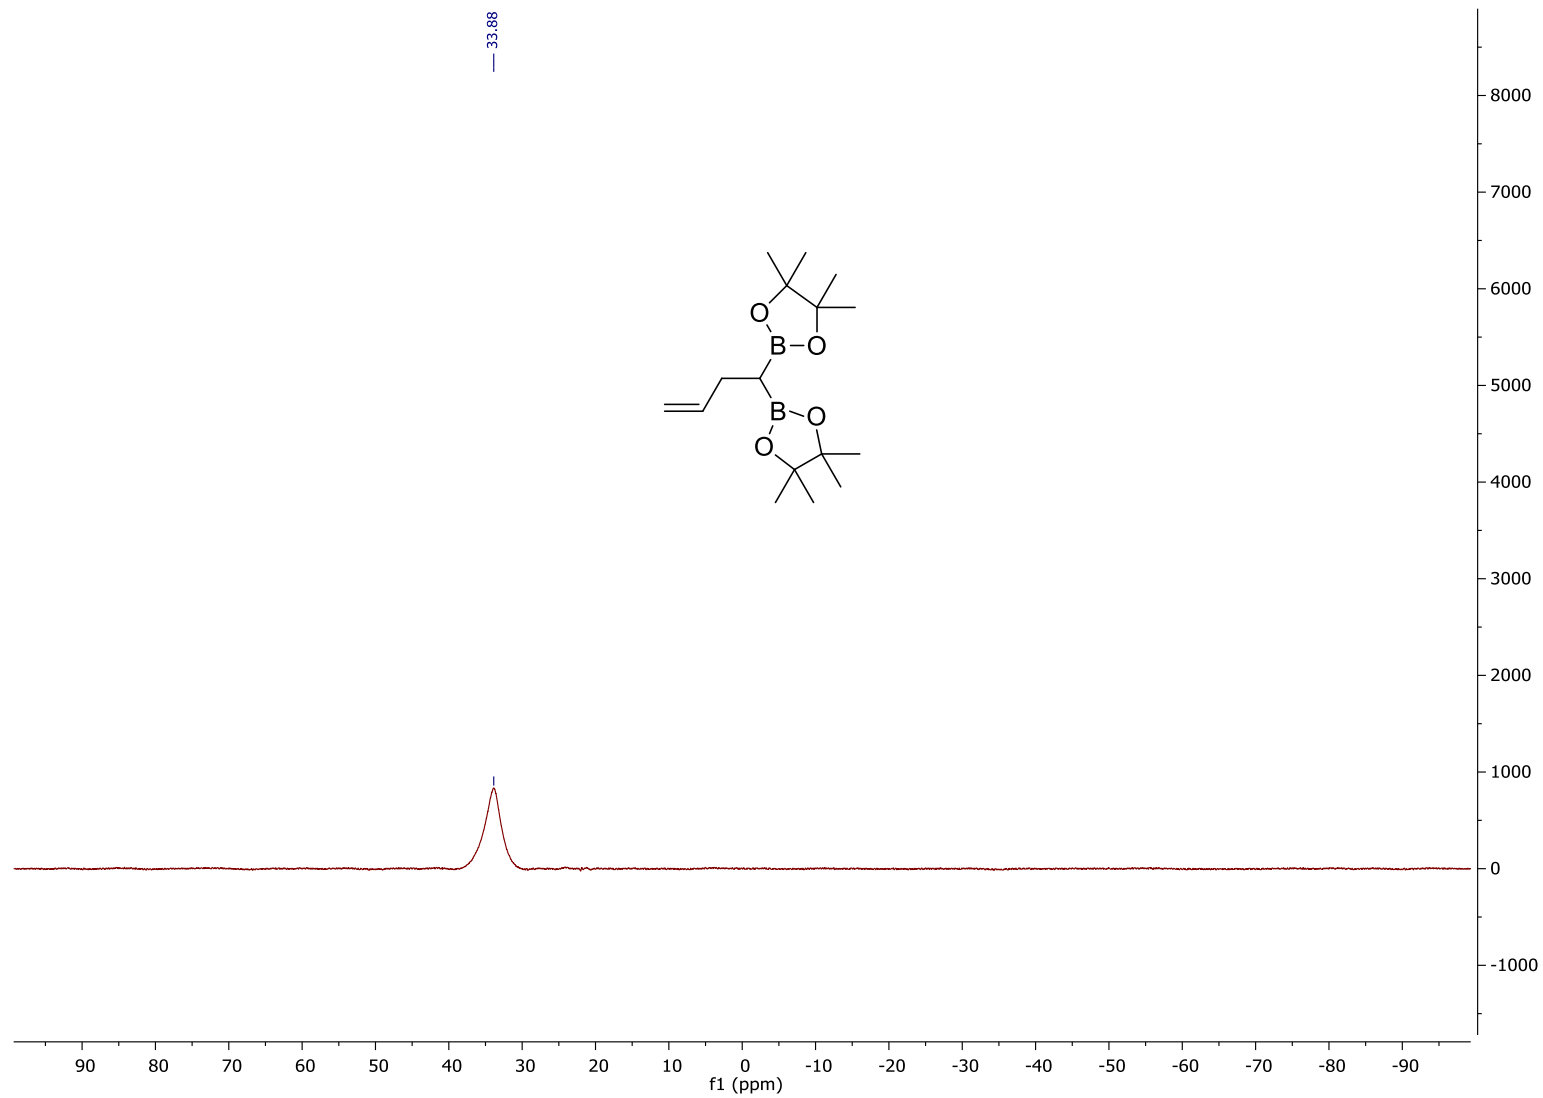

<sup>1</sup>H NMR of compound 2t

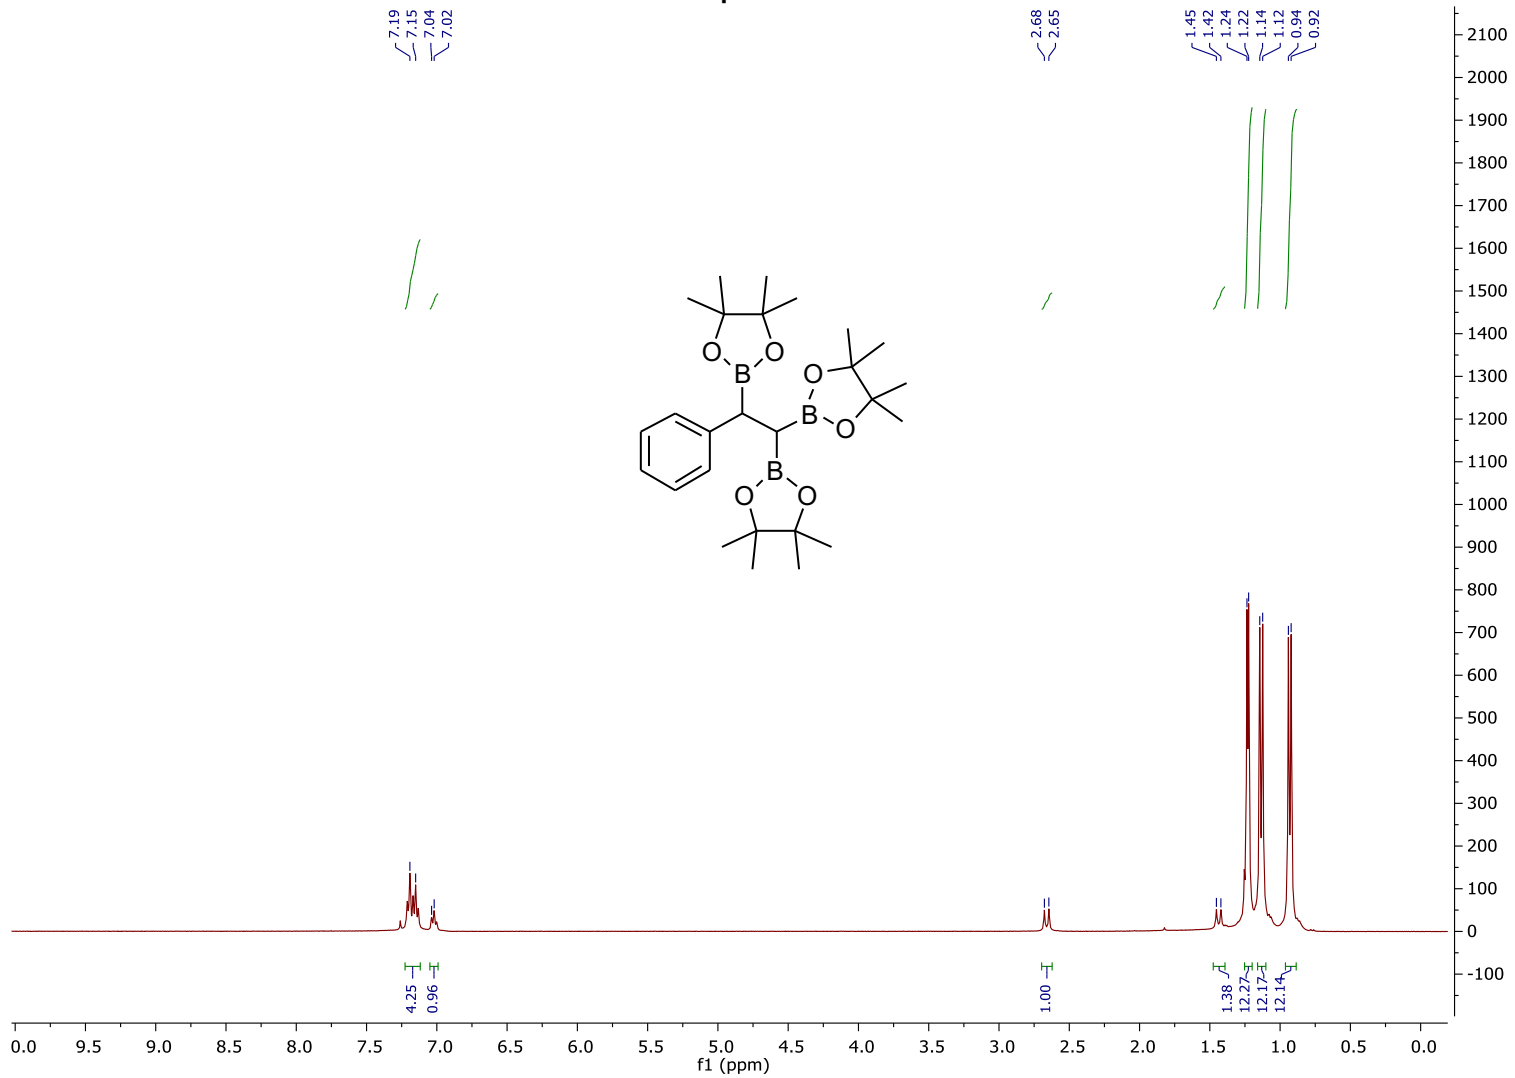





sl-2-220.1.fid  
B11ZG CDCl3 C:\\ nmr 12

### <sup>11</sup>B NMR of compound 2t

33.46

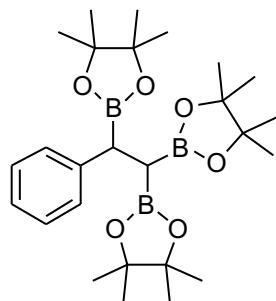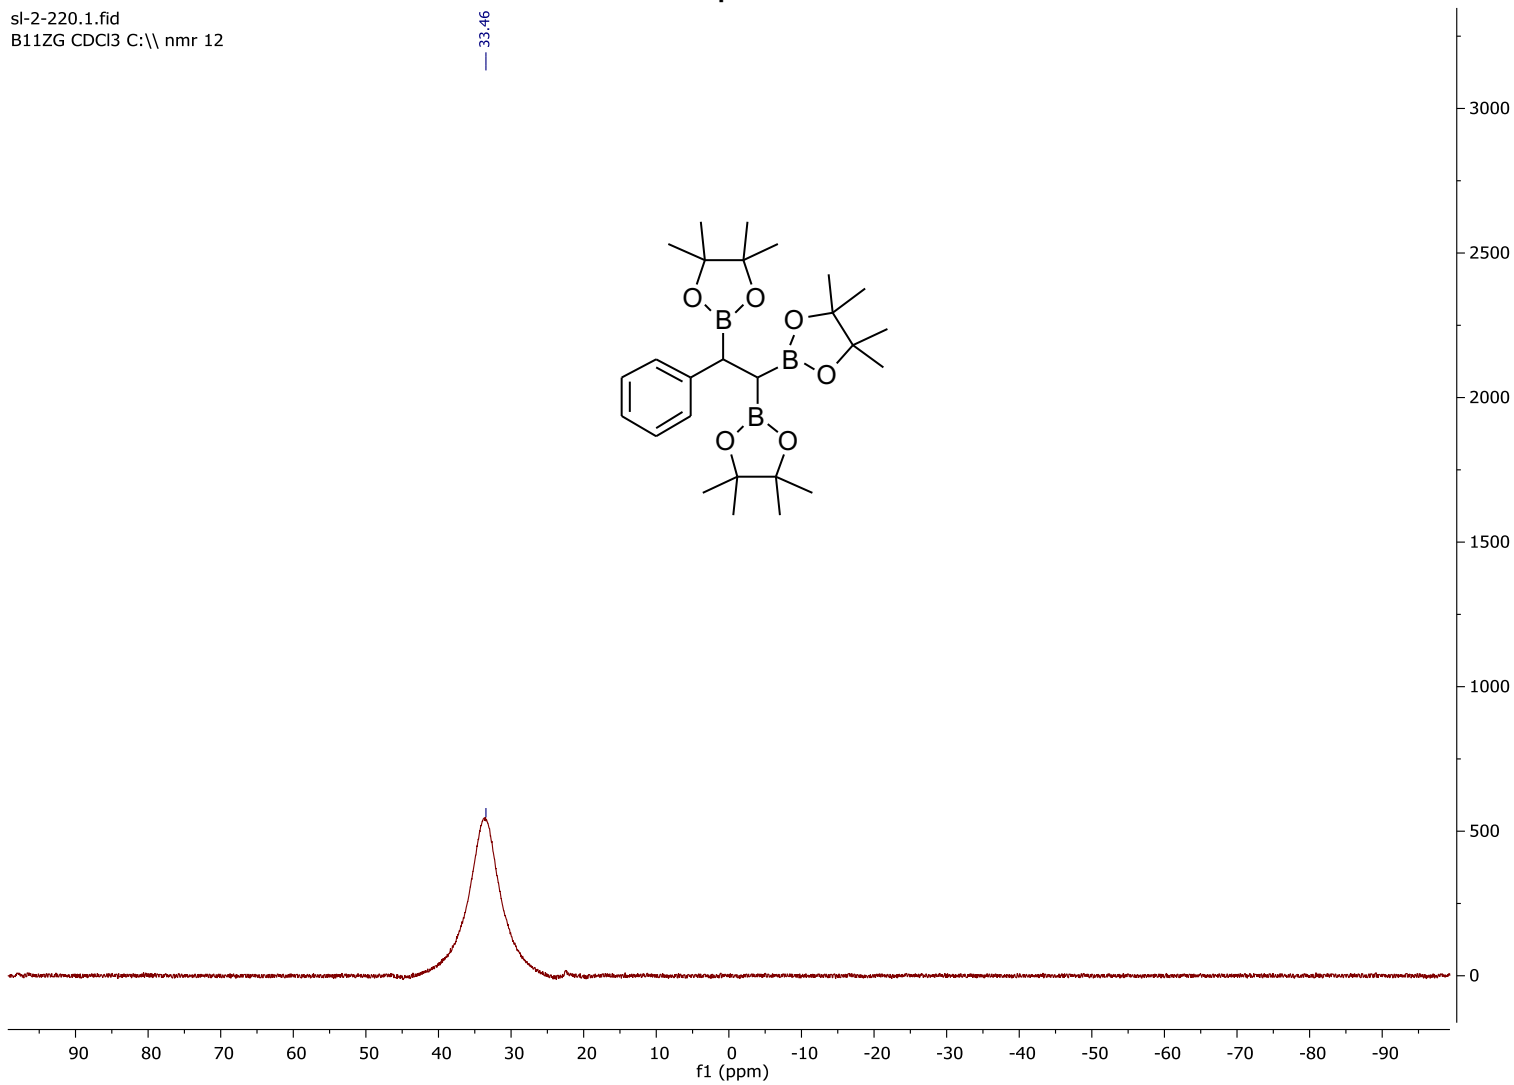

<sup>1</sup>H NMR, compound 3a

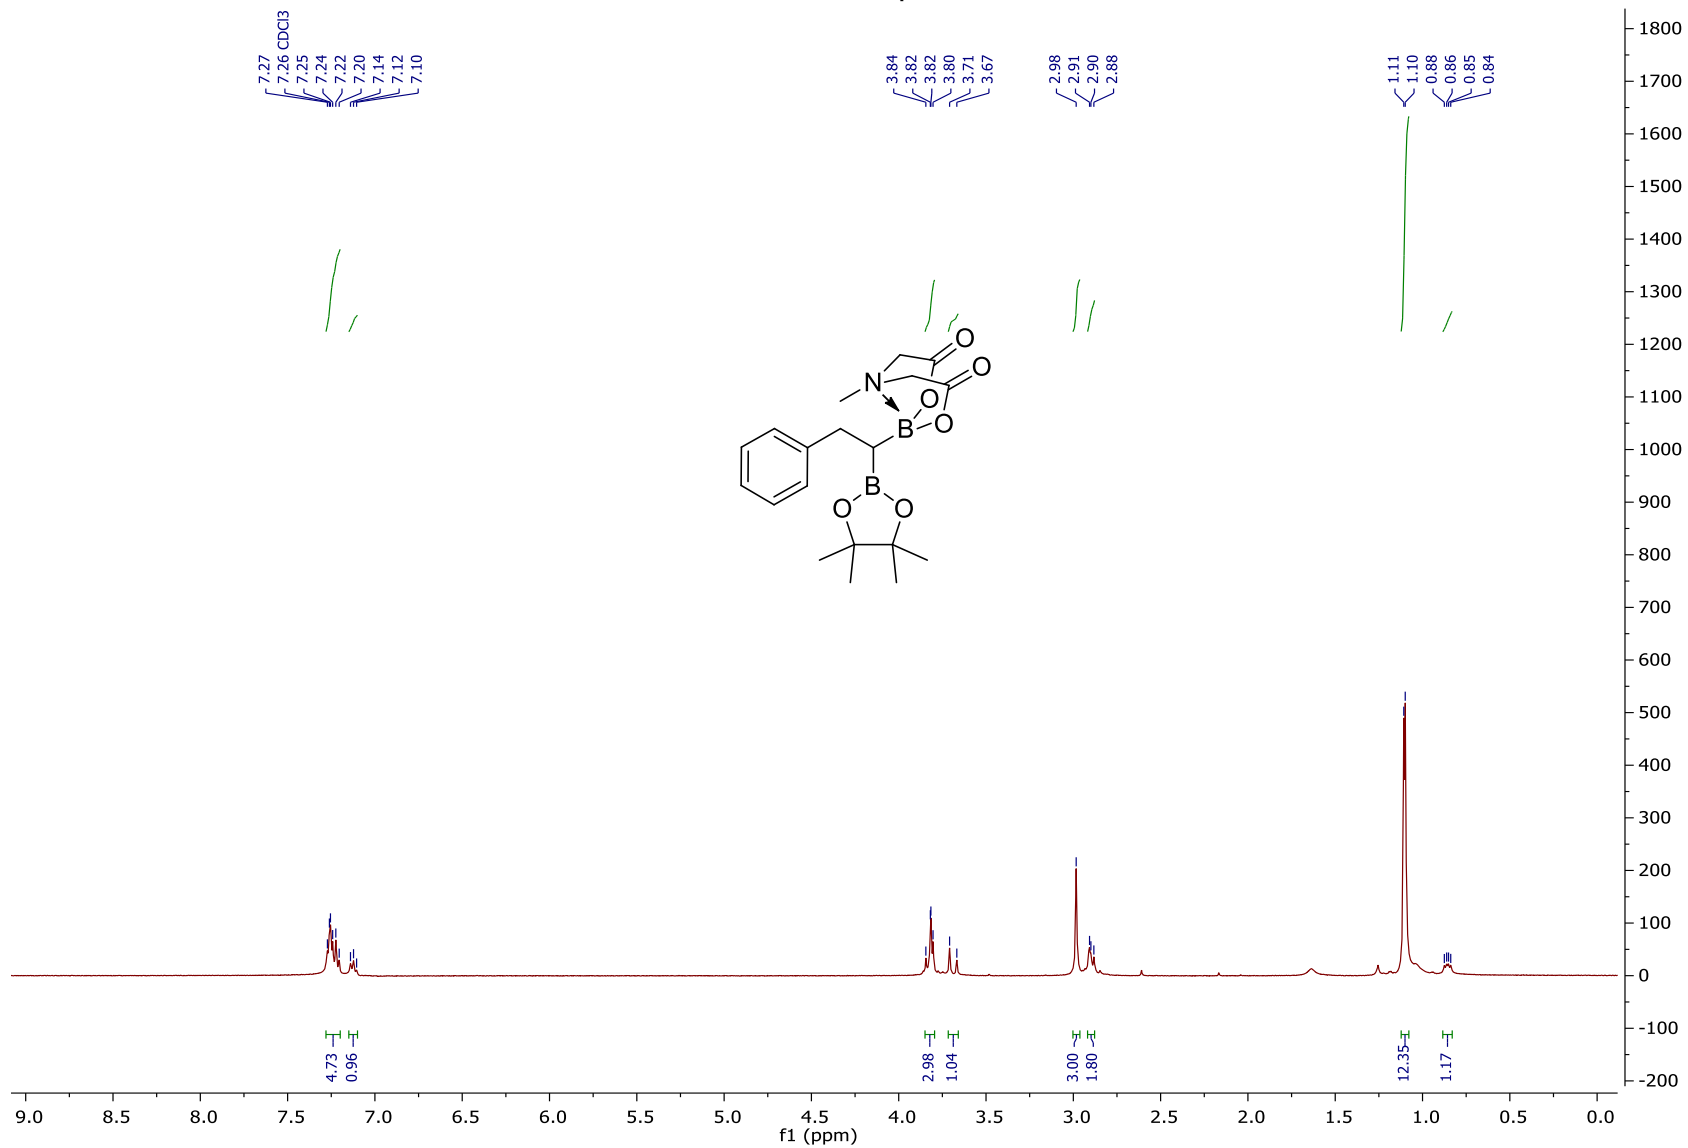

<sup>13</sup>C NMR, compound 3a

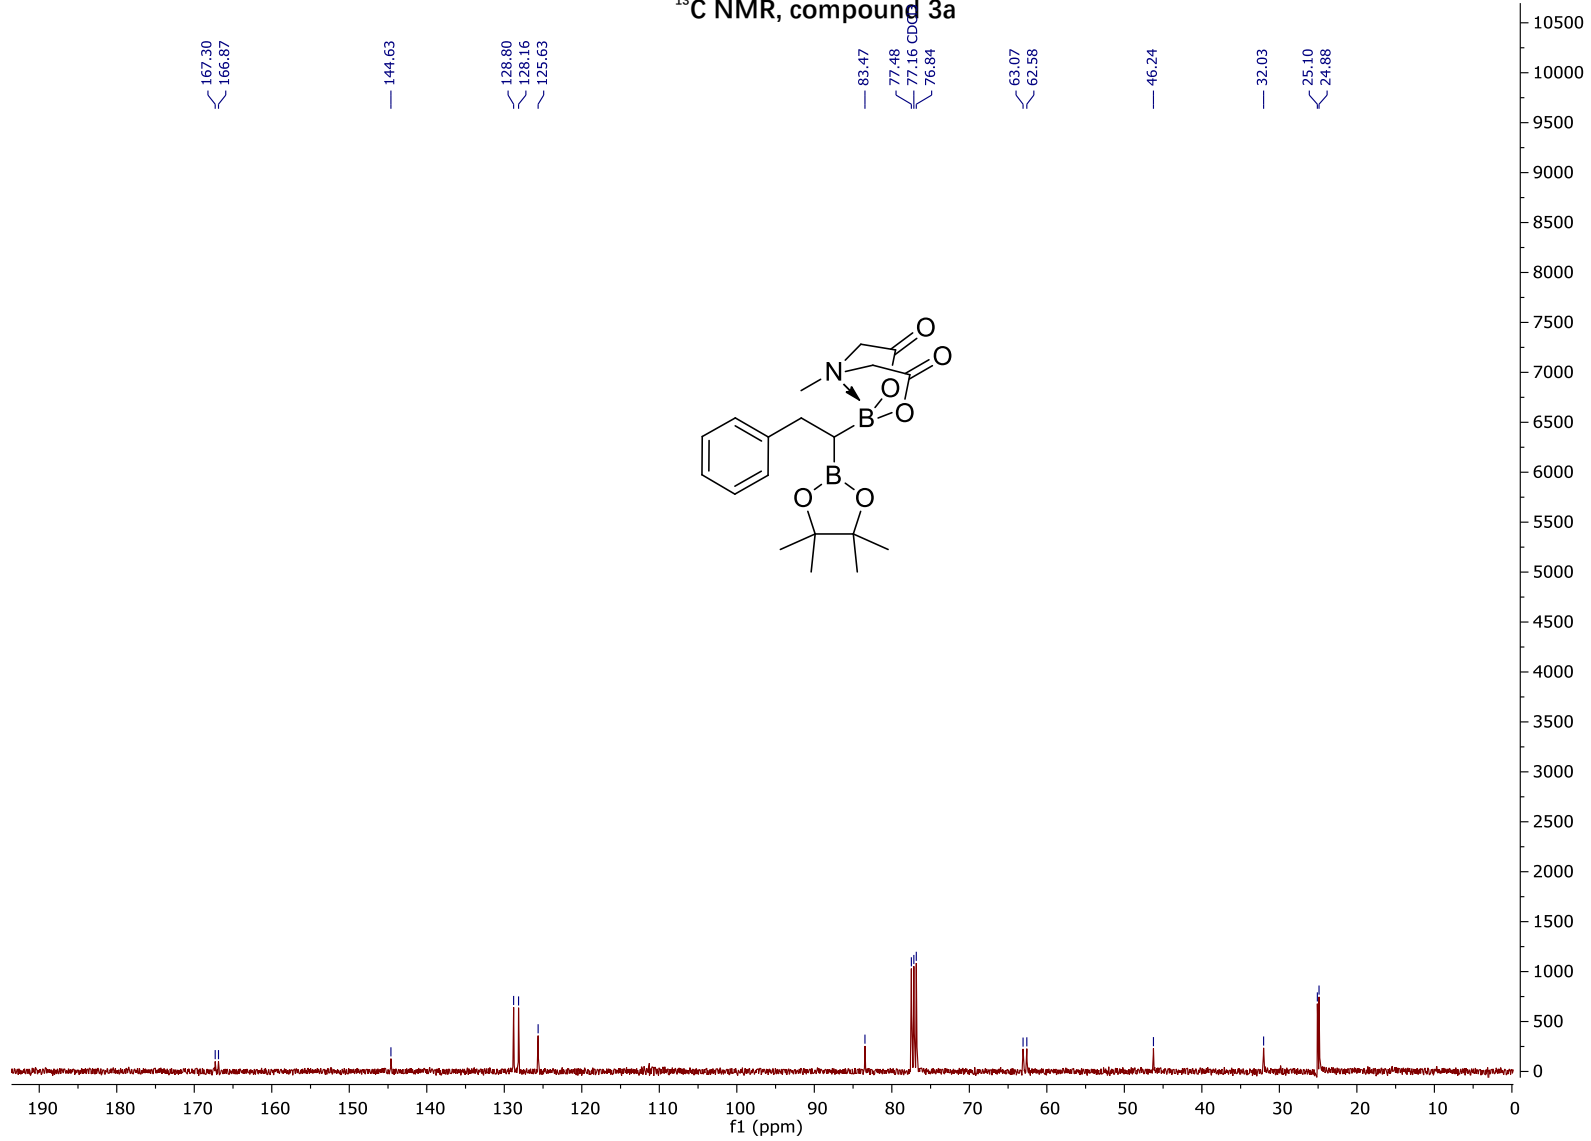

<sup>11</sup>B NMR, compound 3a

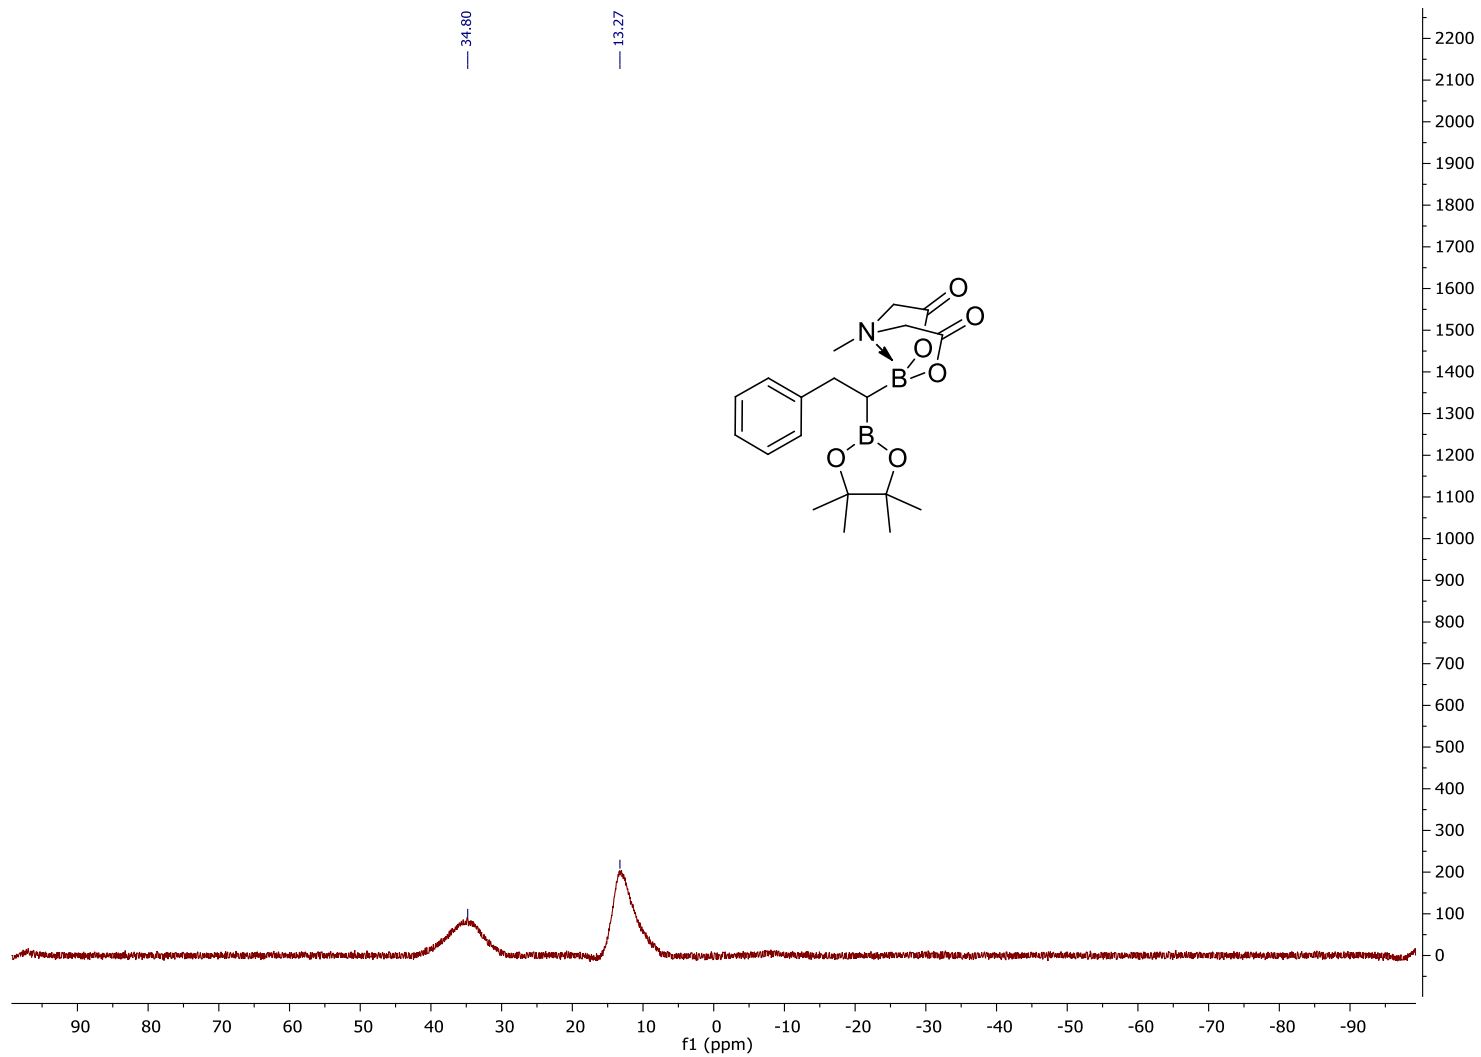



<sup>13</sup>C NMR, compound 3b

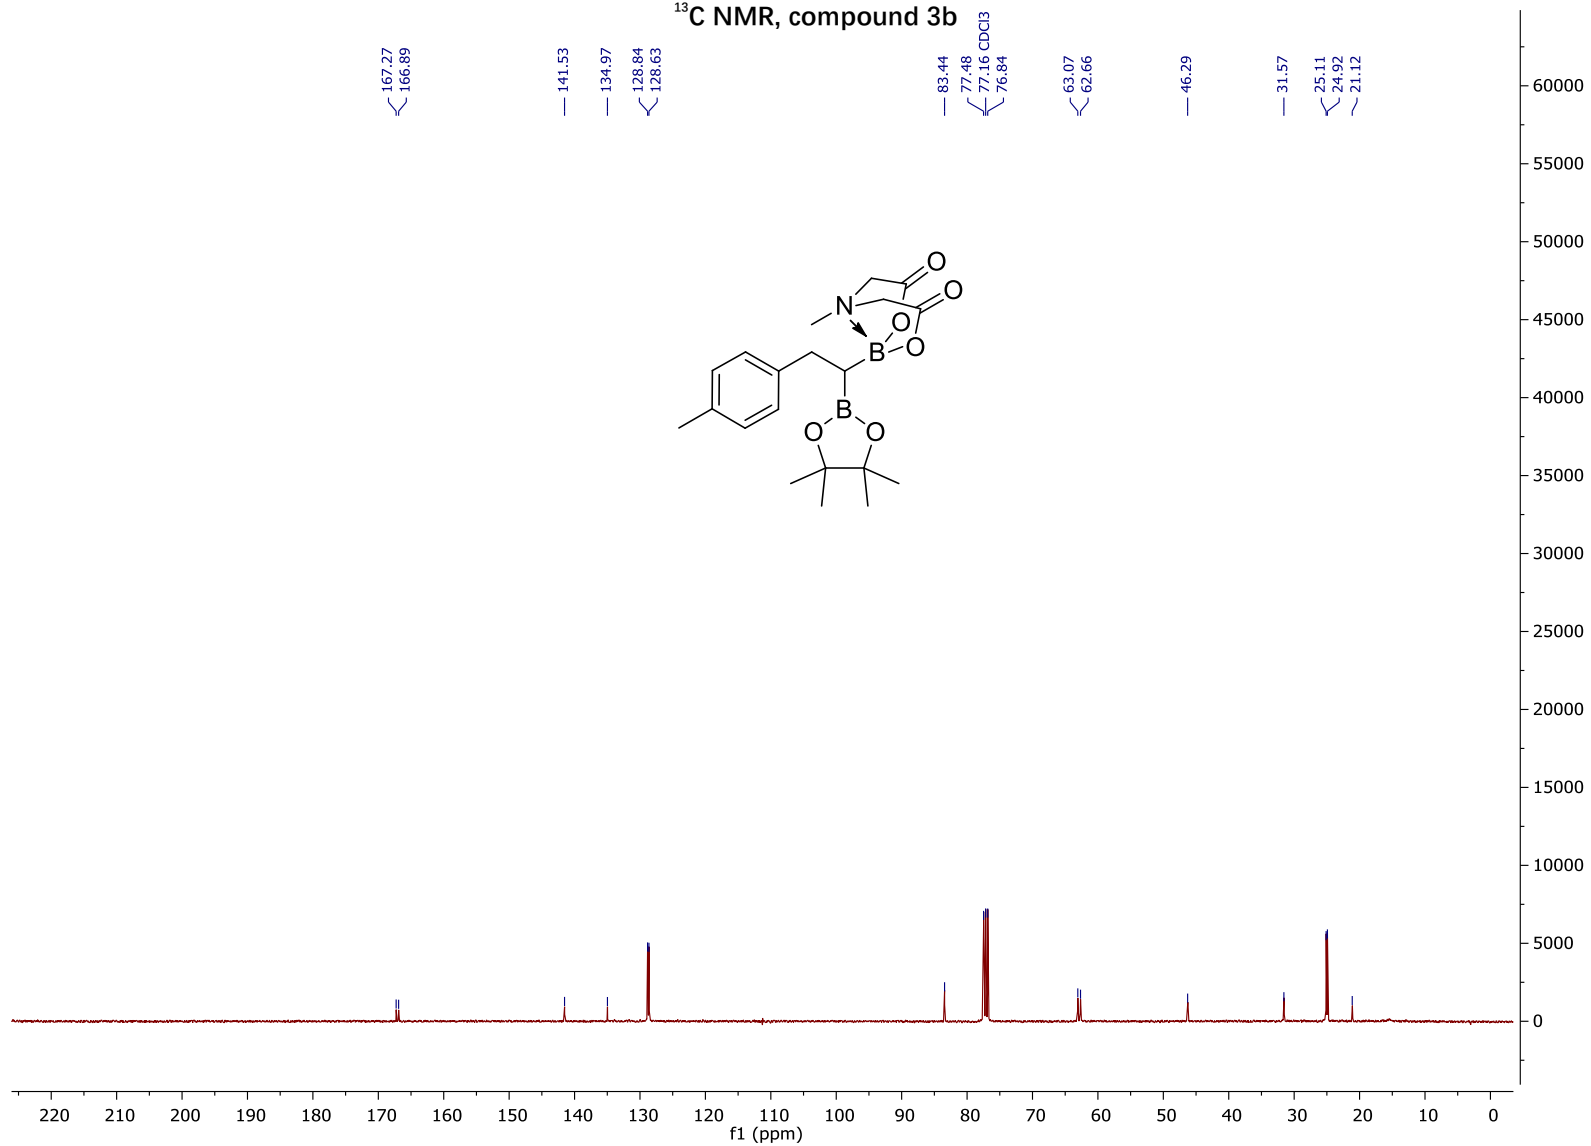

<sup>11</sup>B NMR, compound 3b

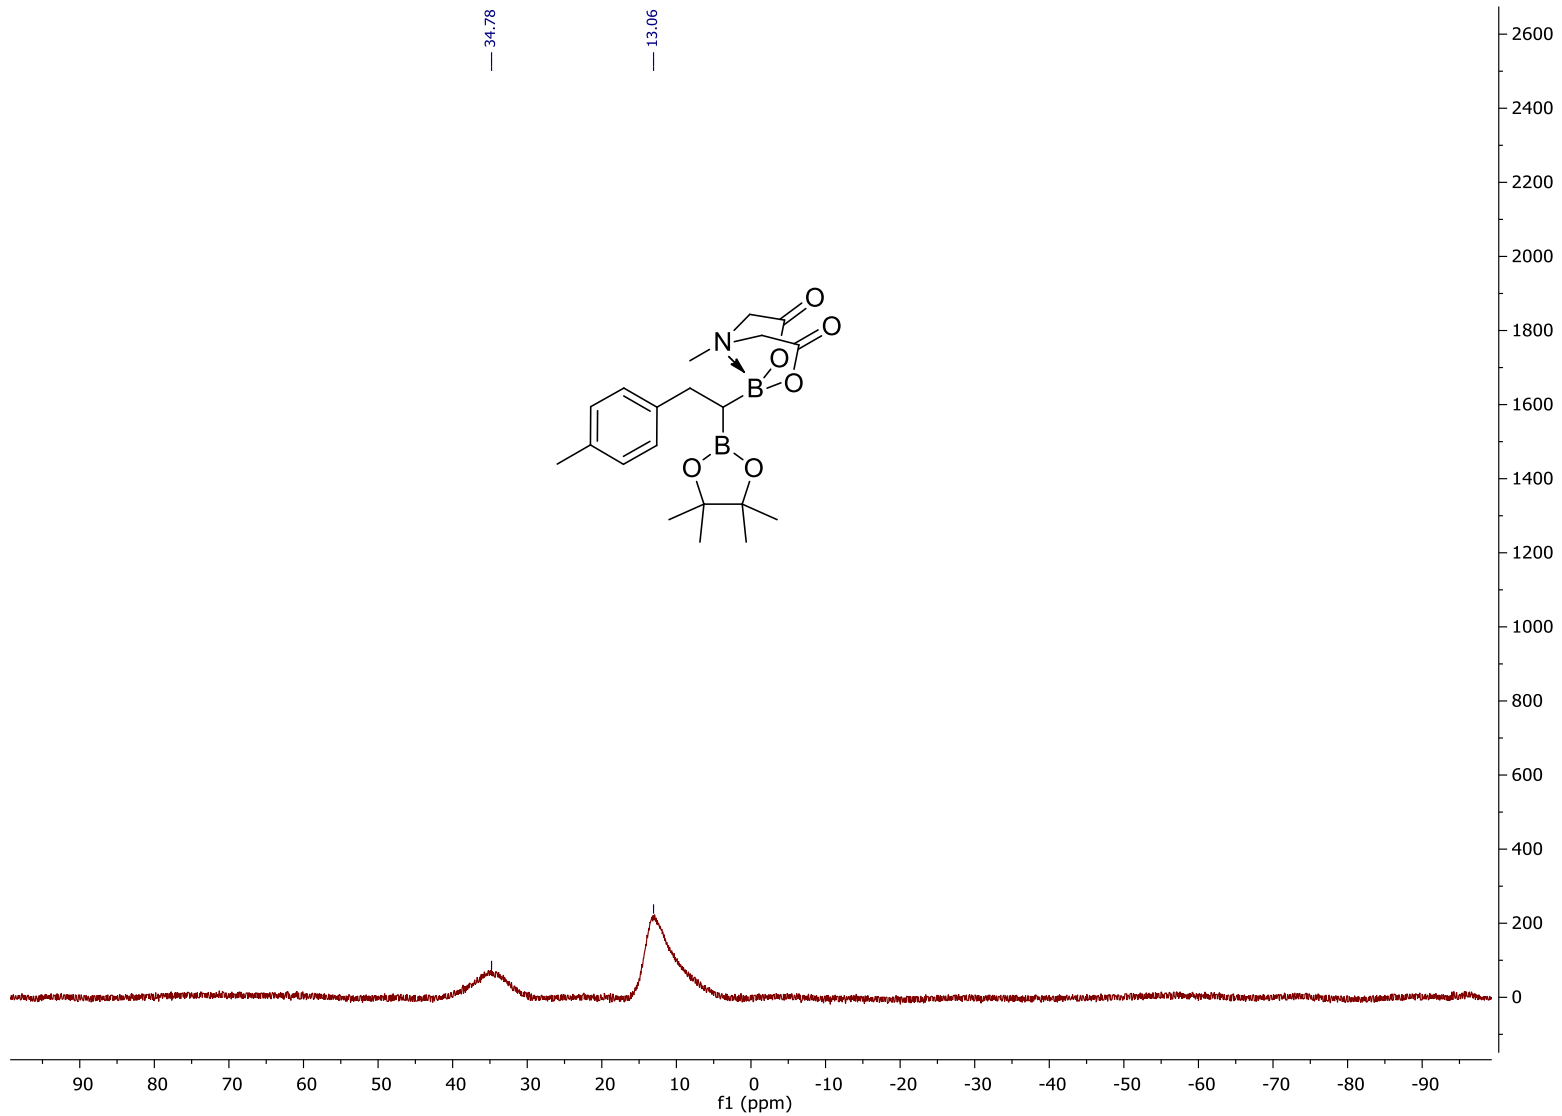

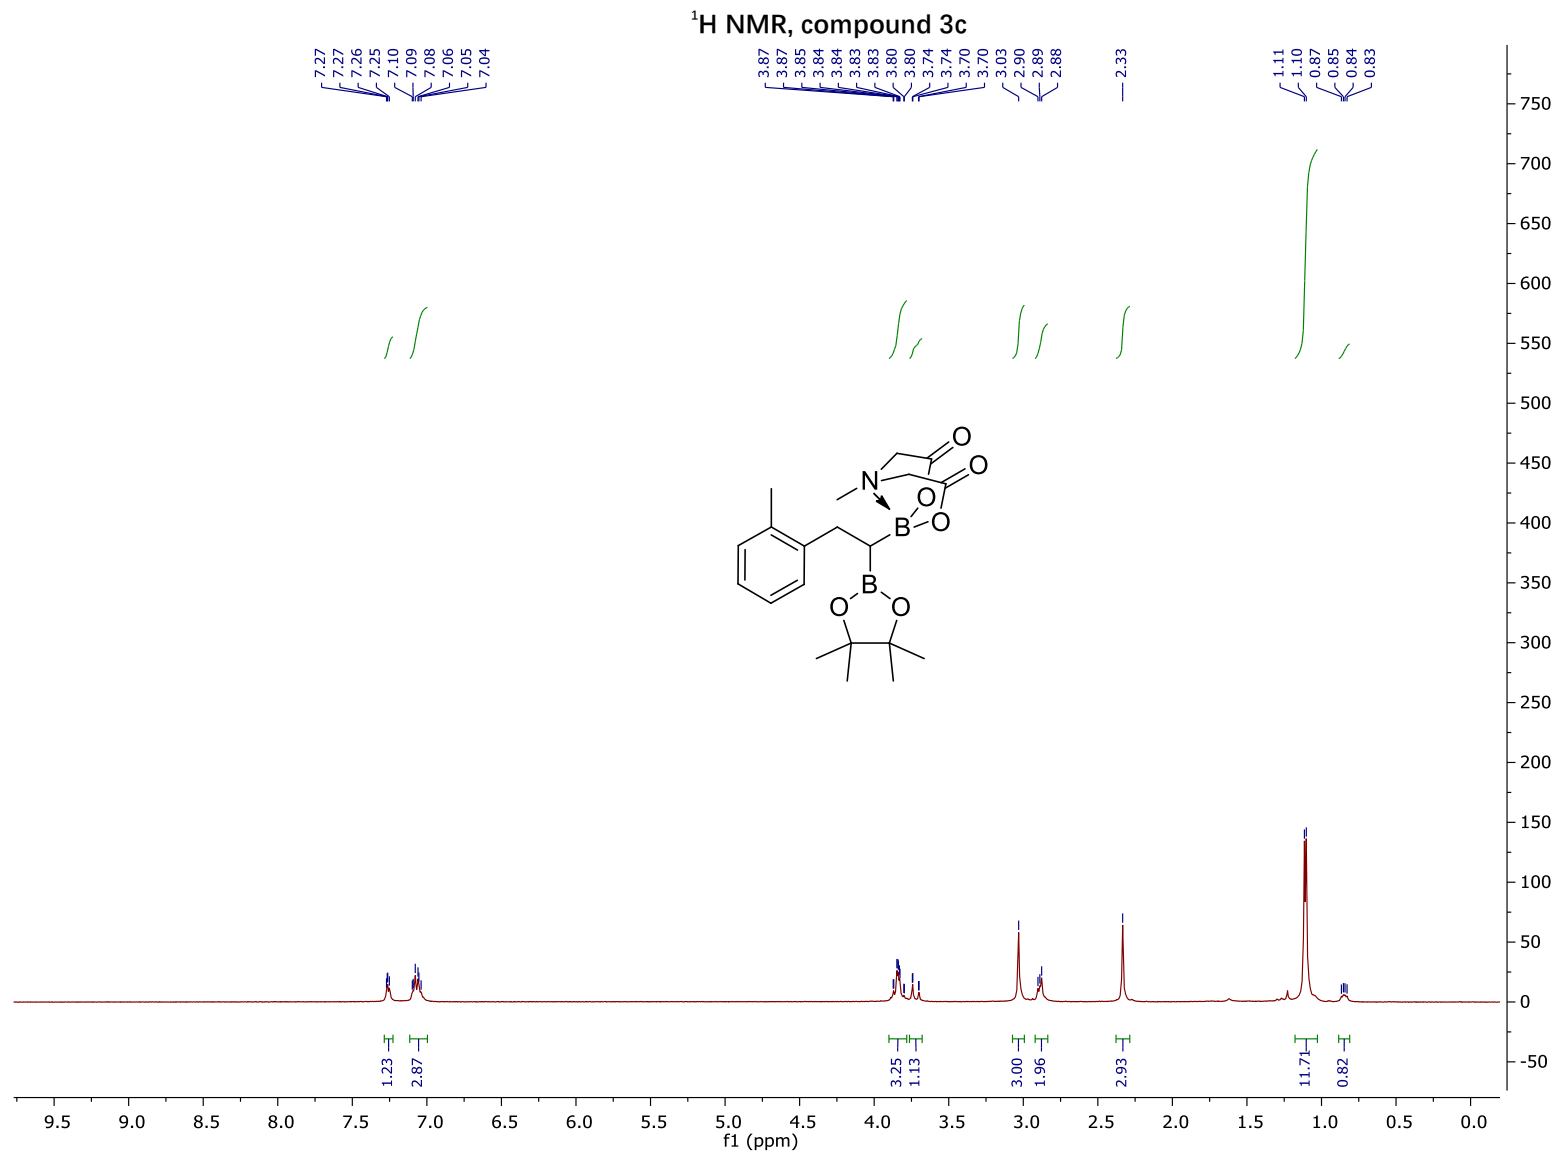



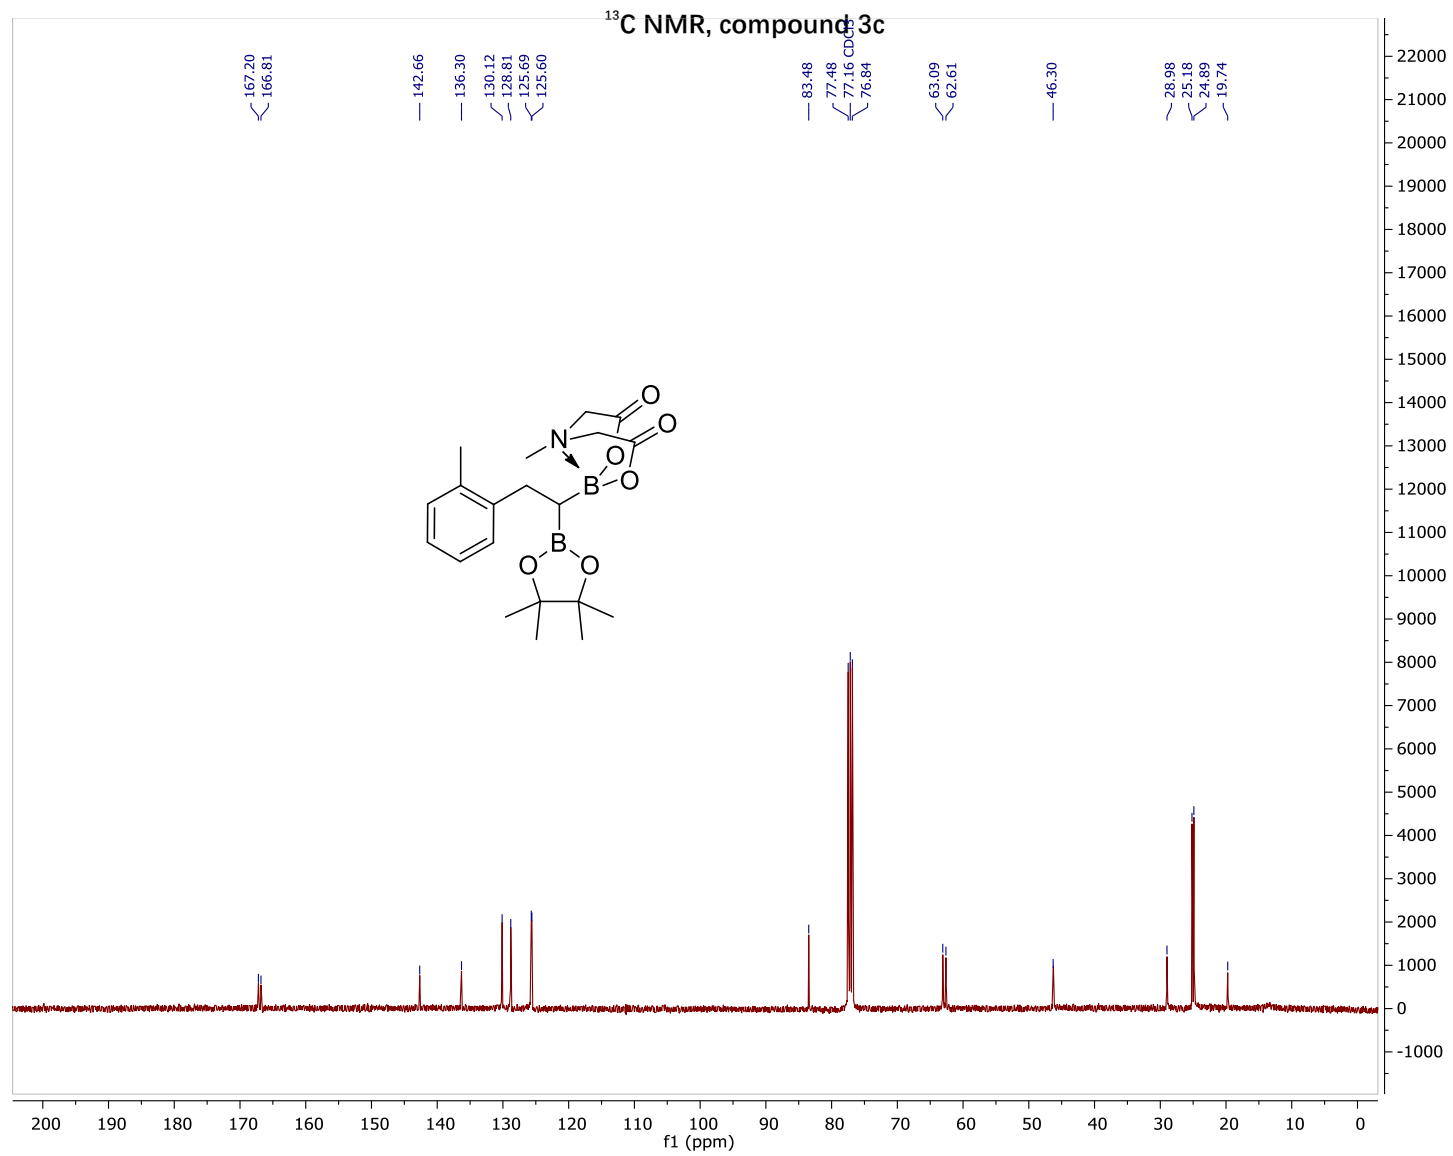

<sup>11</sup>B NMR, compound 3c

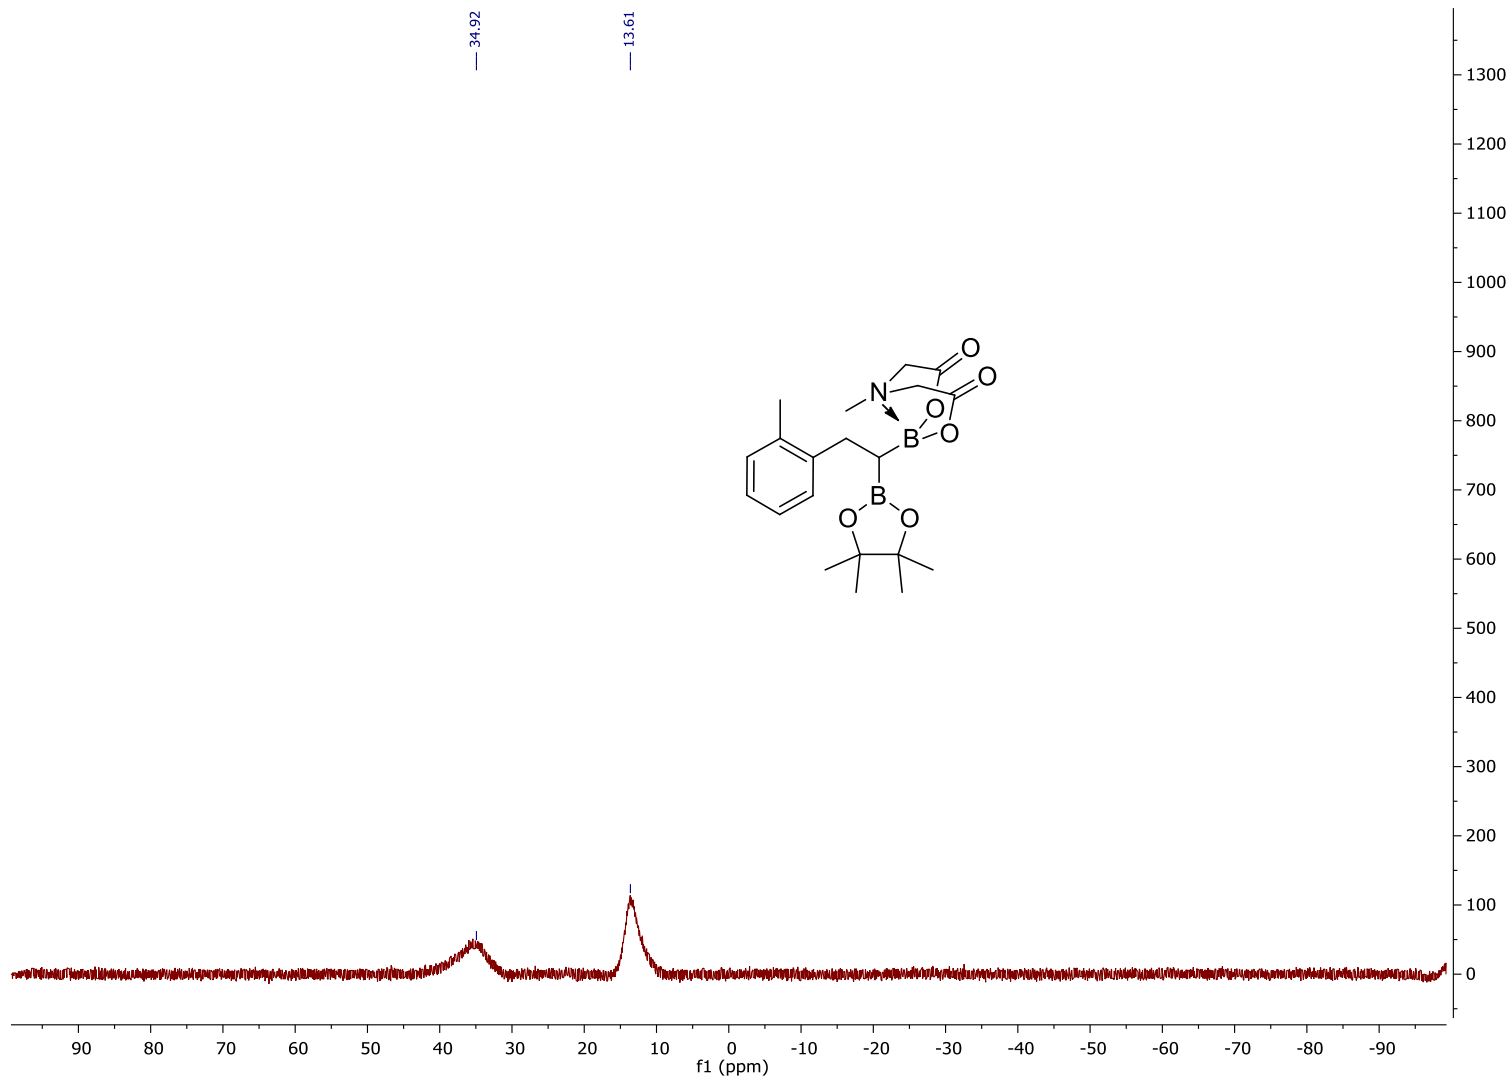

<sup>1</sup>H NMR, compound 3d

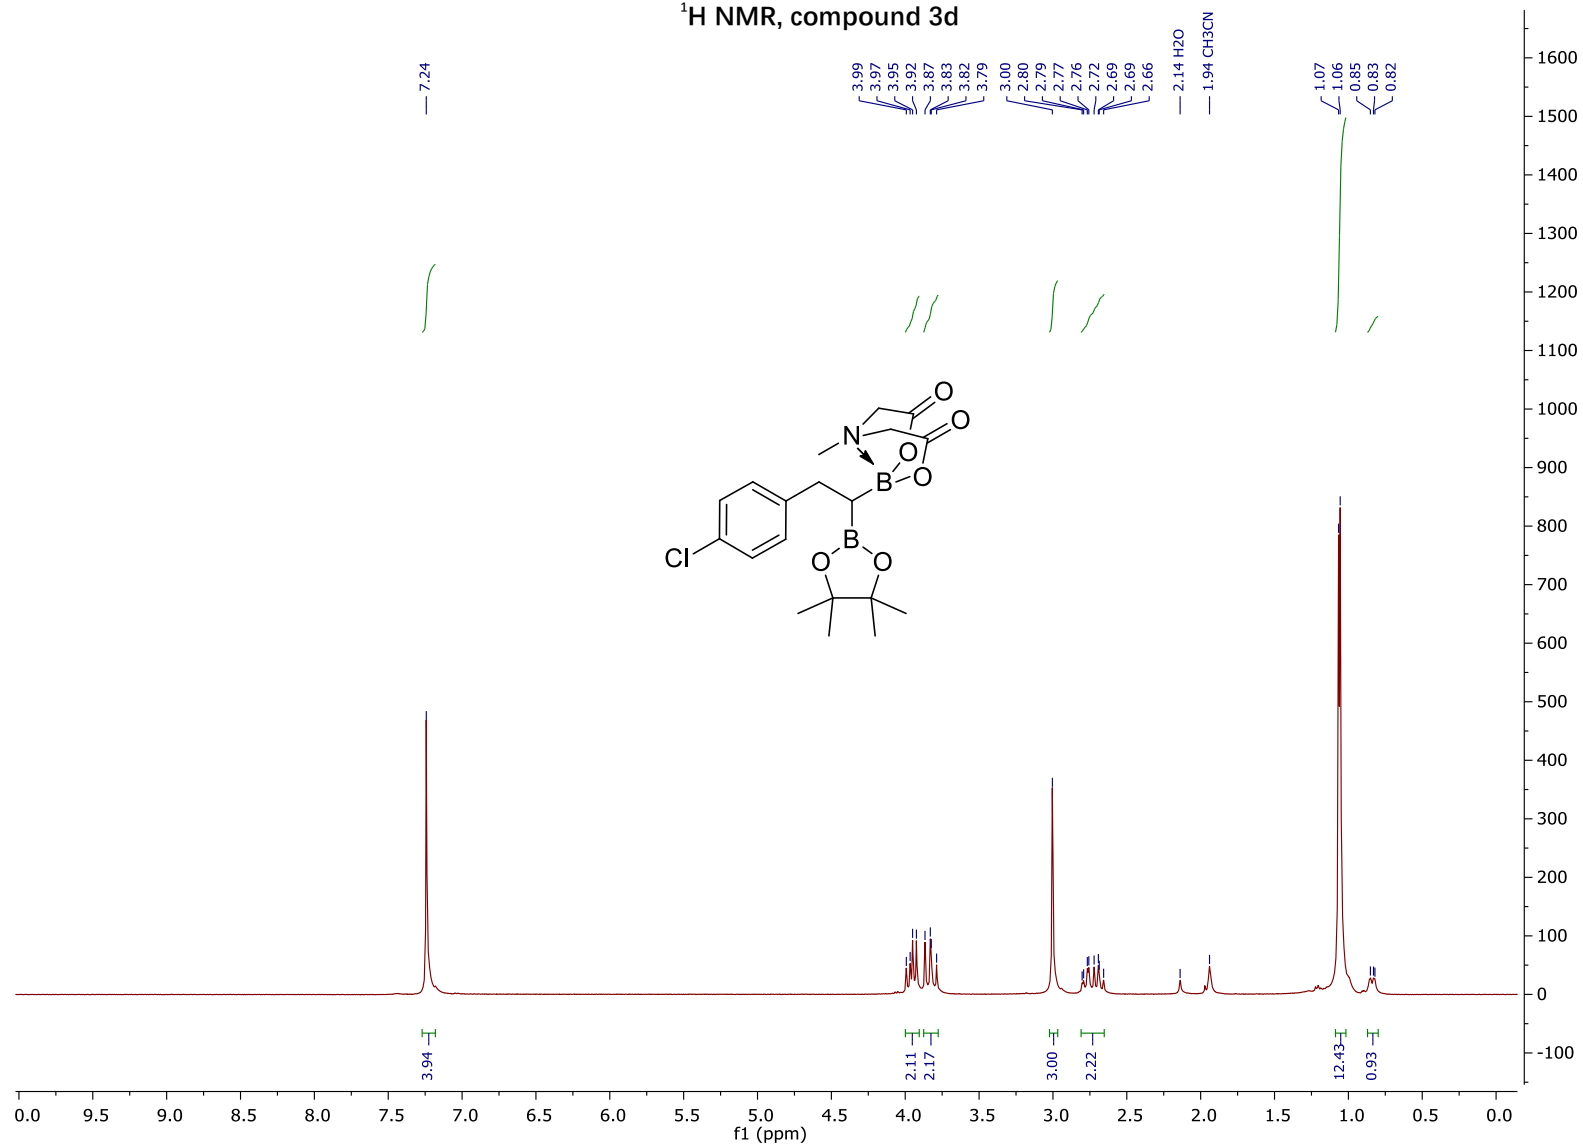

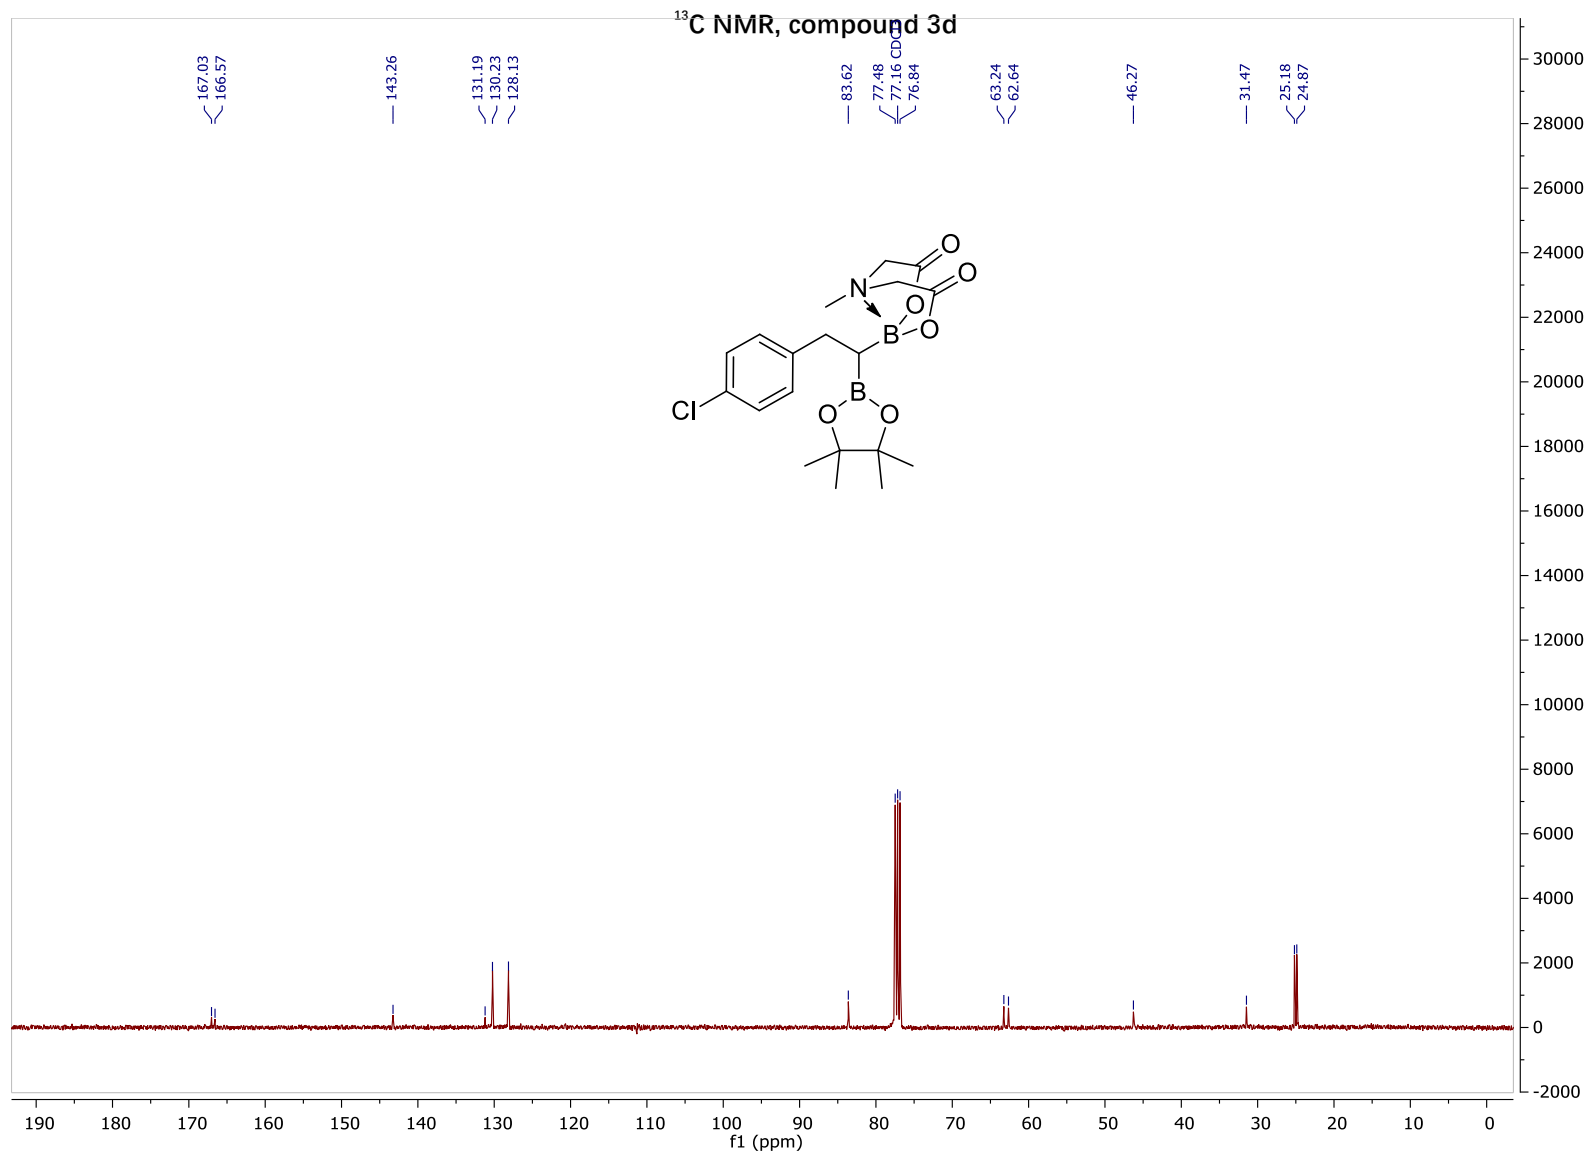

<sup>11</sup>B NMR, compound 3d

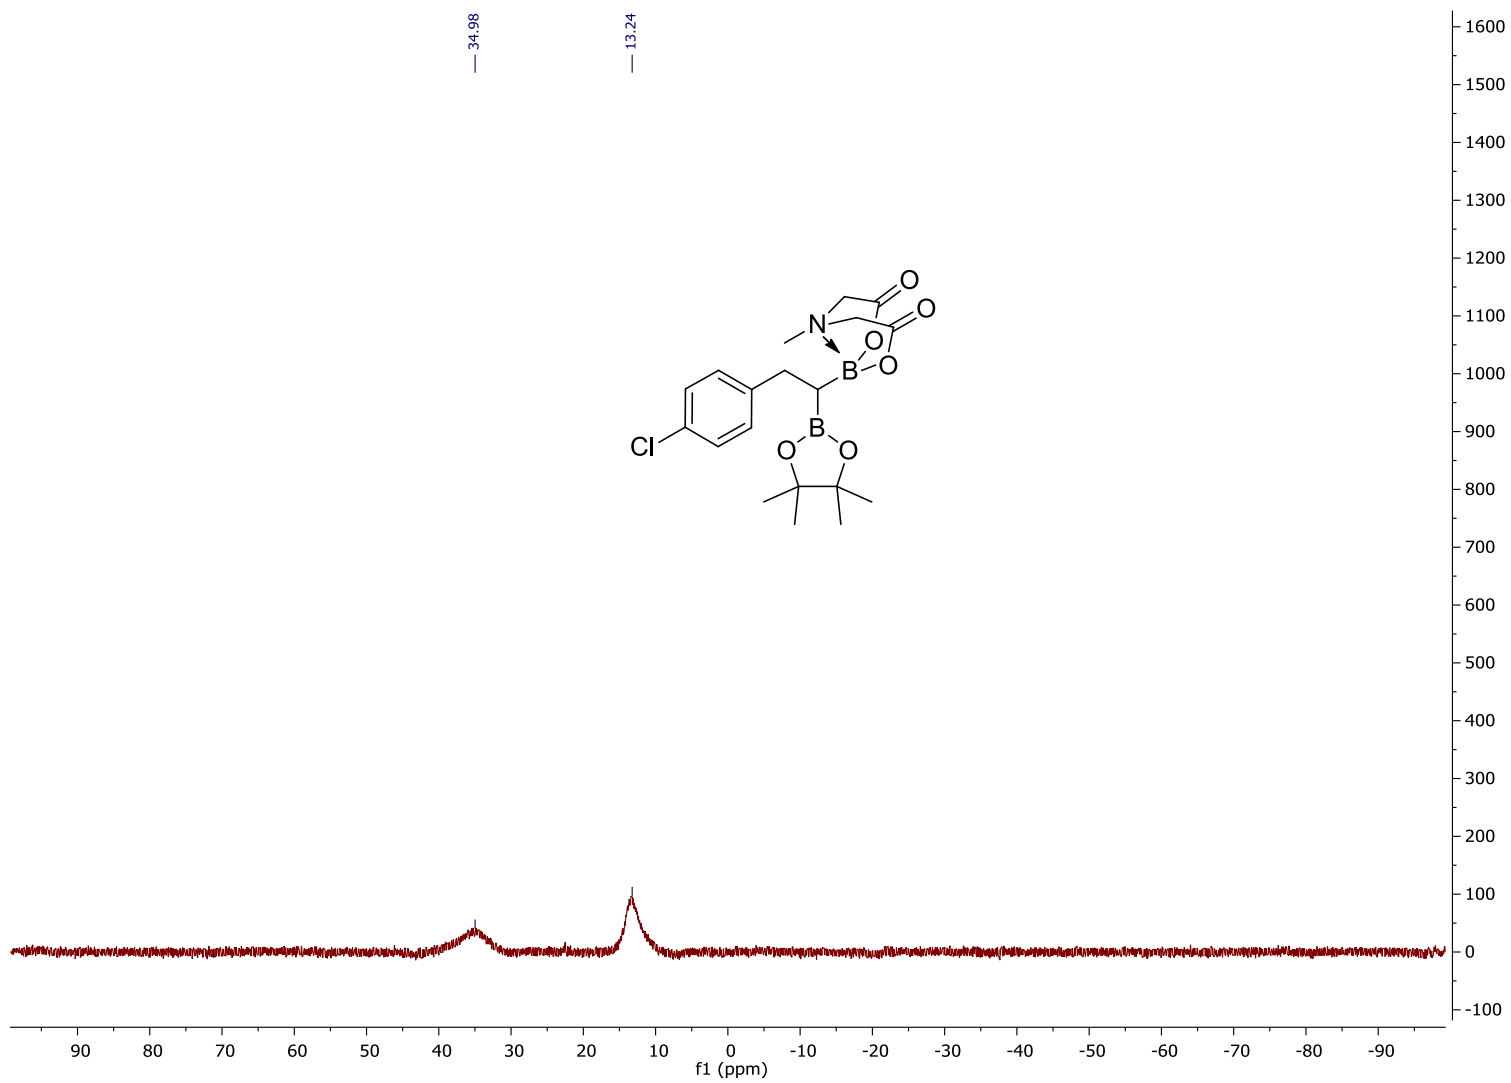

<sup>1</sup>H NMR, compound 3e

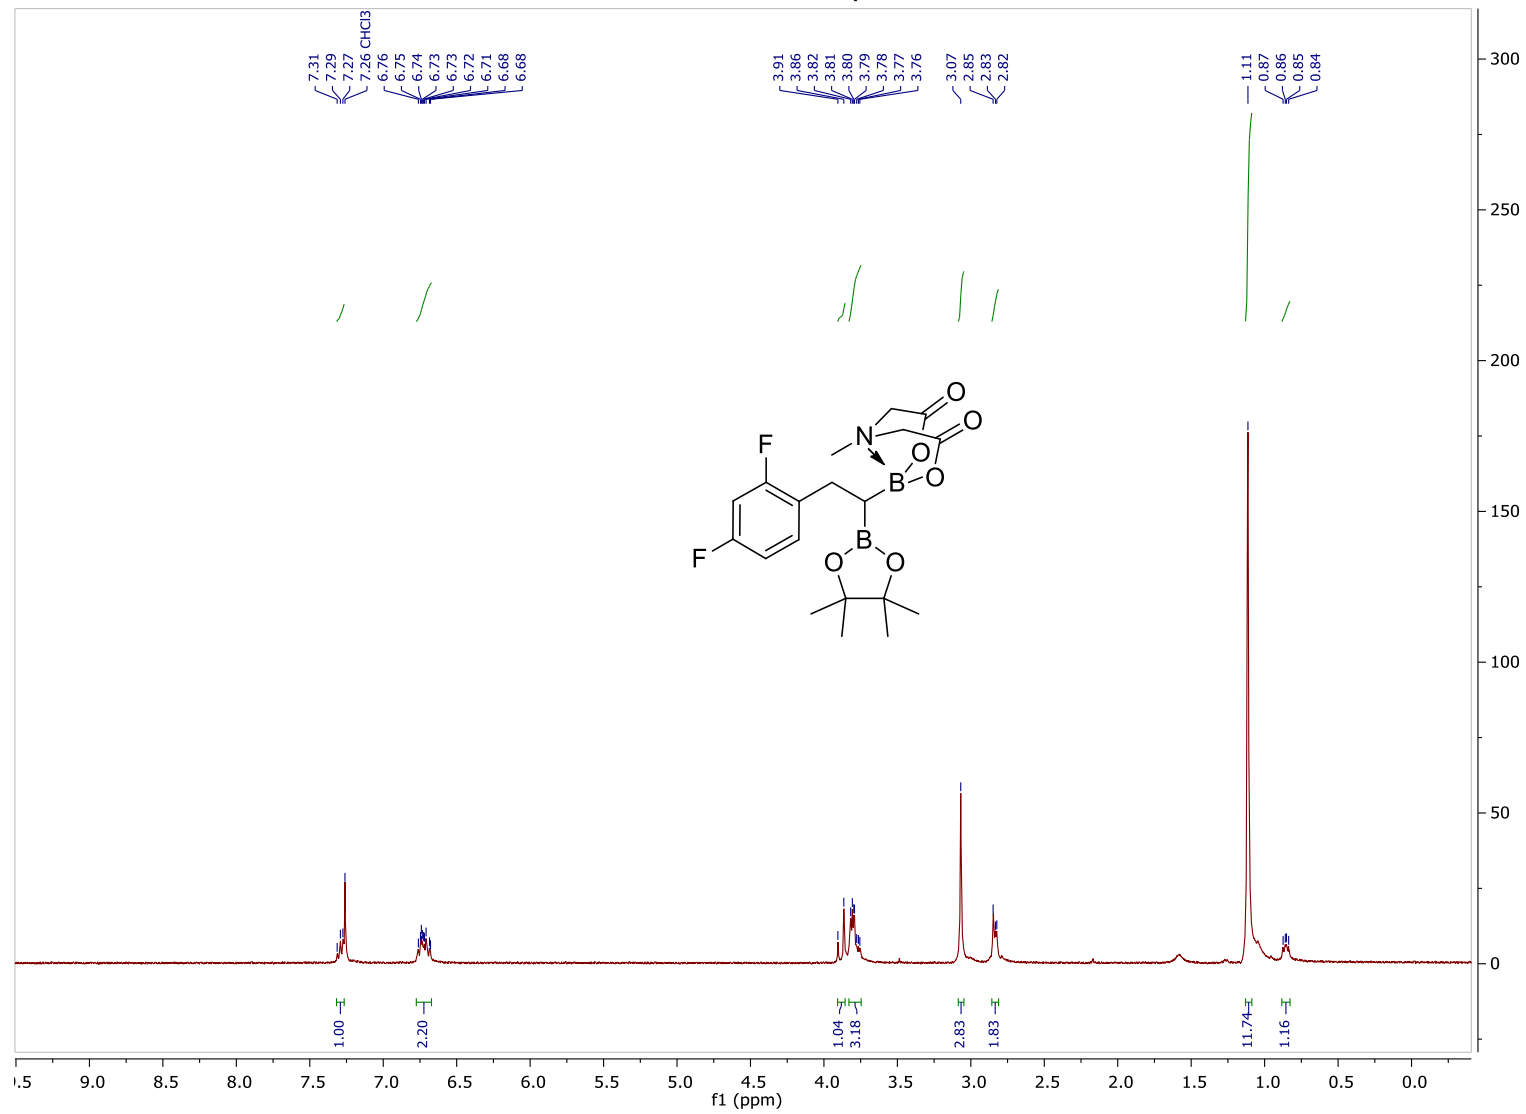

<sup>13</sup>C NMR, compound 3e

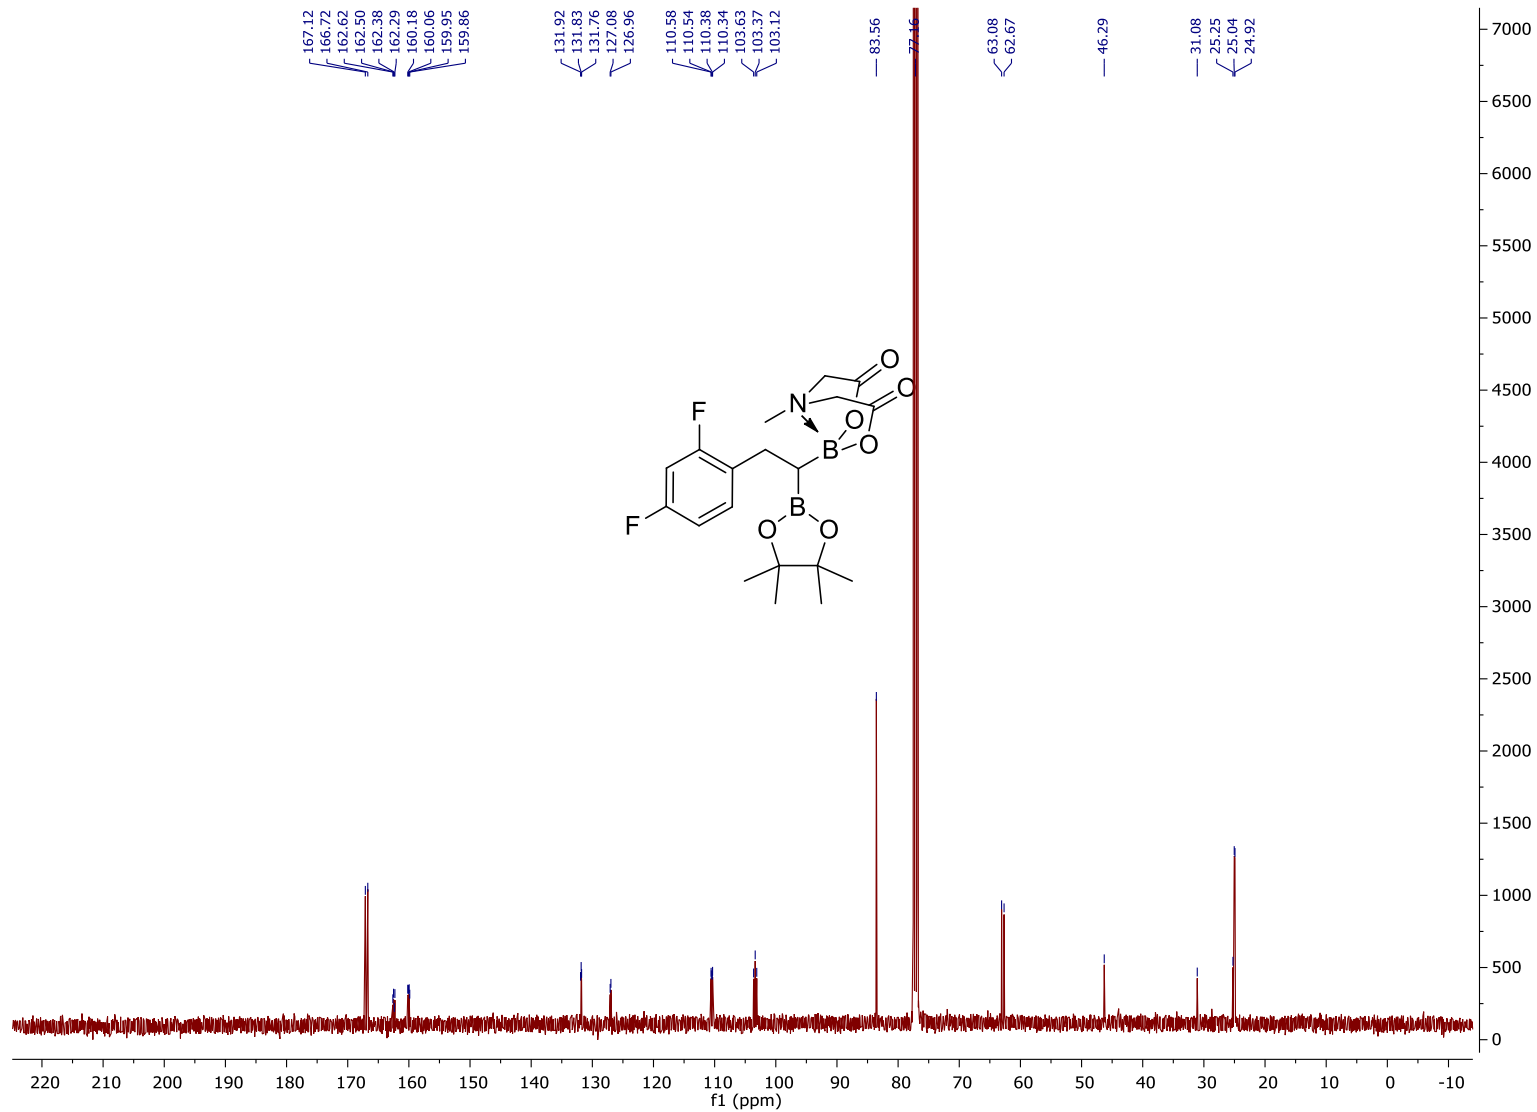

<sup>11</sup>B NMR, compound 3e

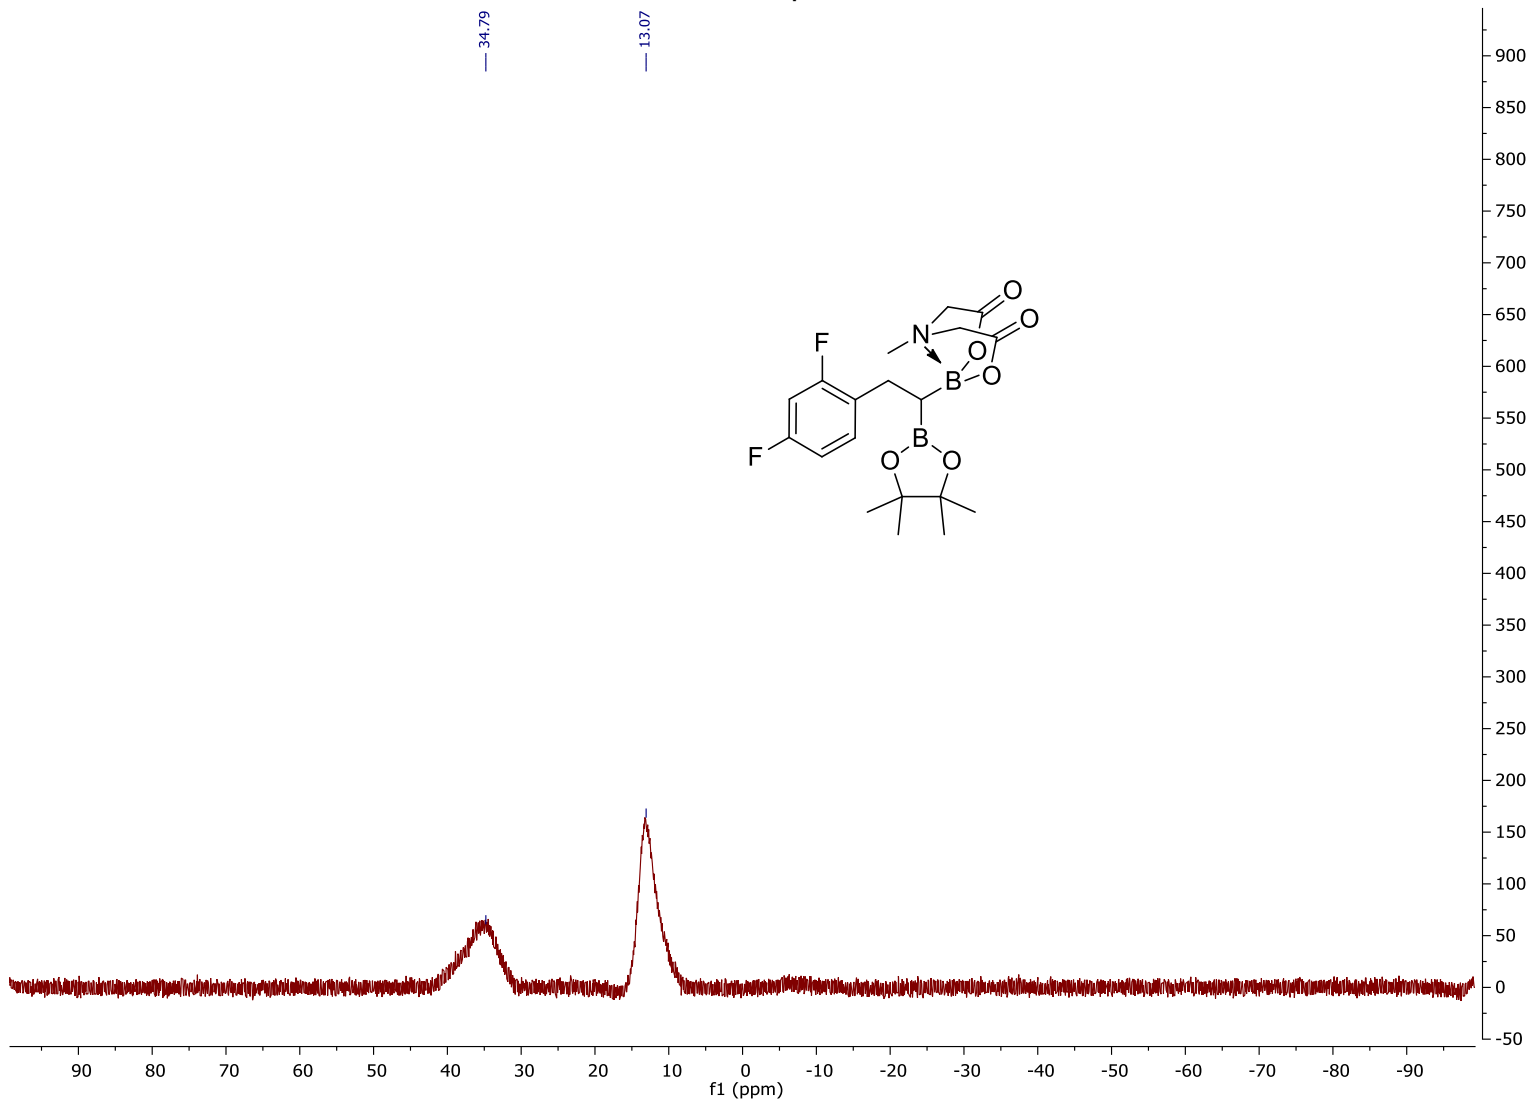



<sup>19</sup>F NMR, compound 3e

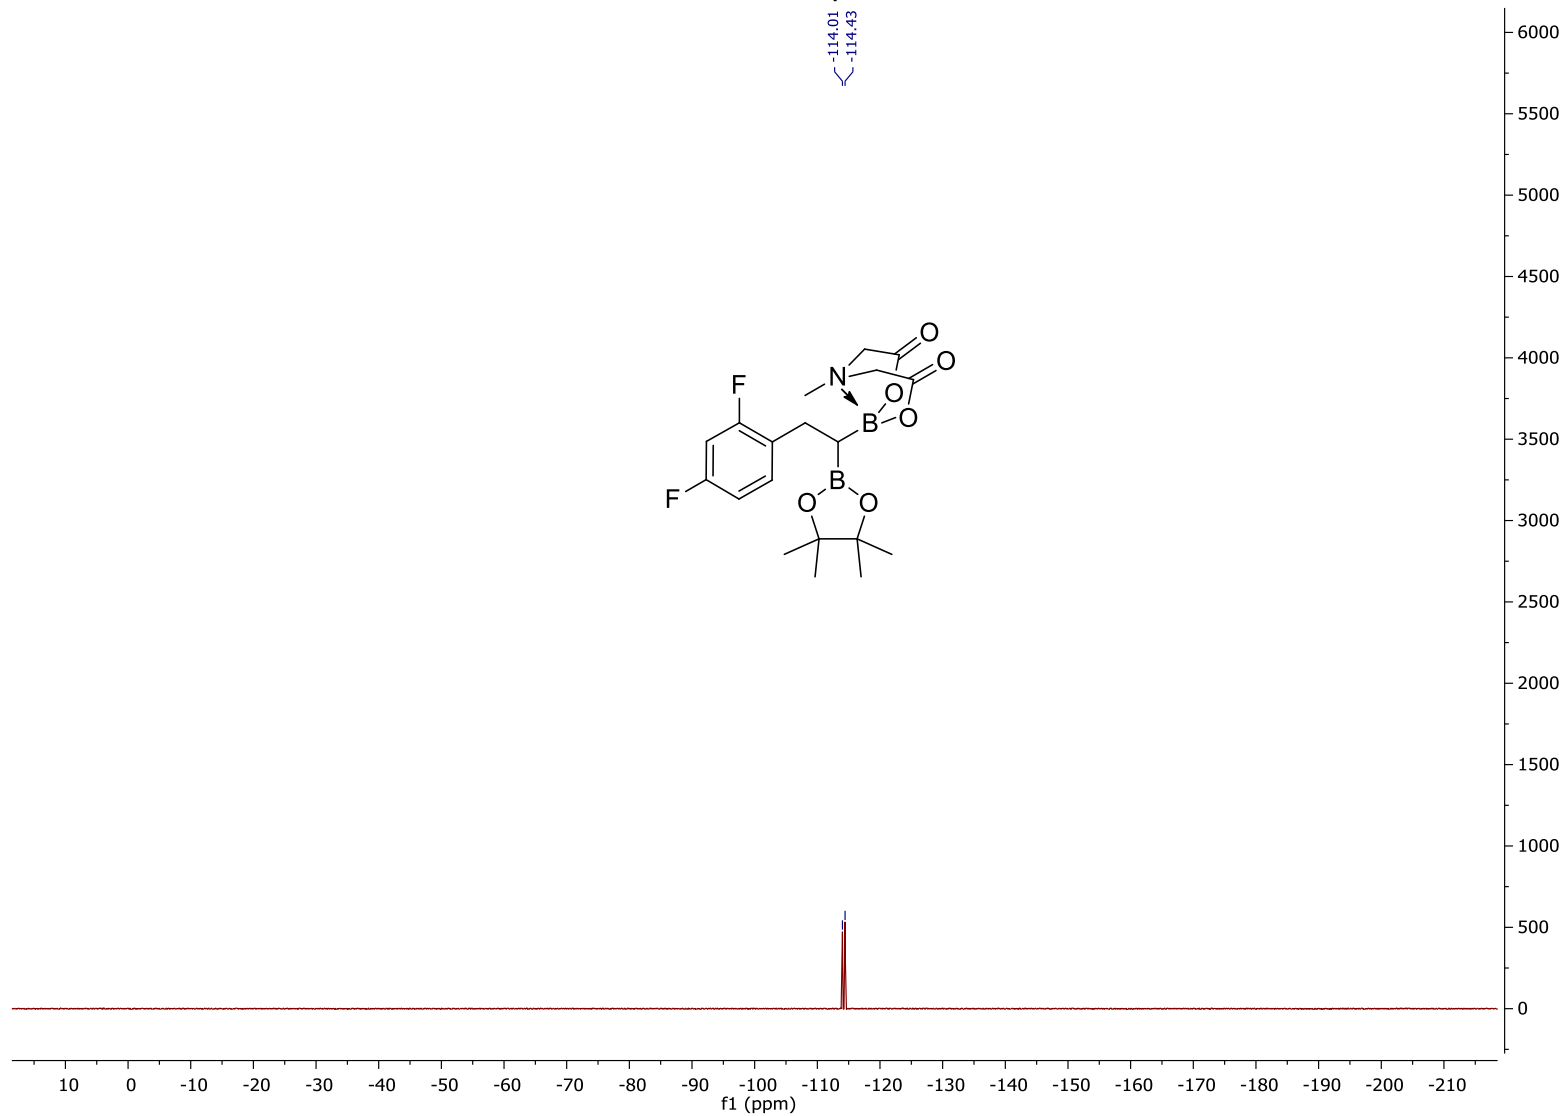

<sup>1</sup>H NMR, compound 3f

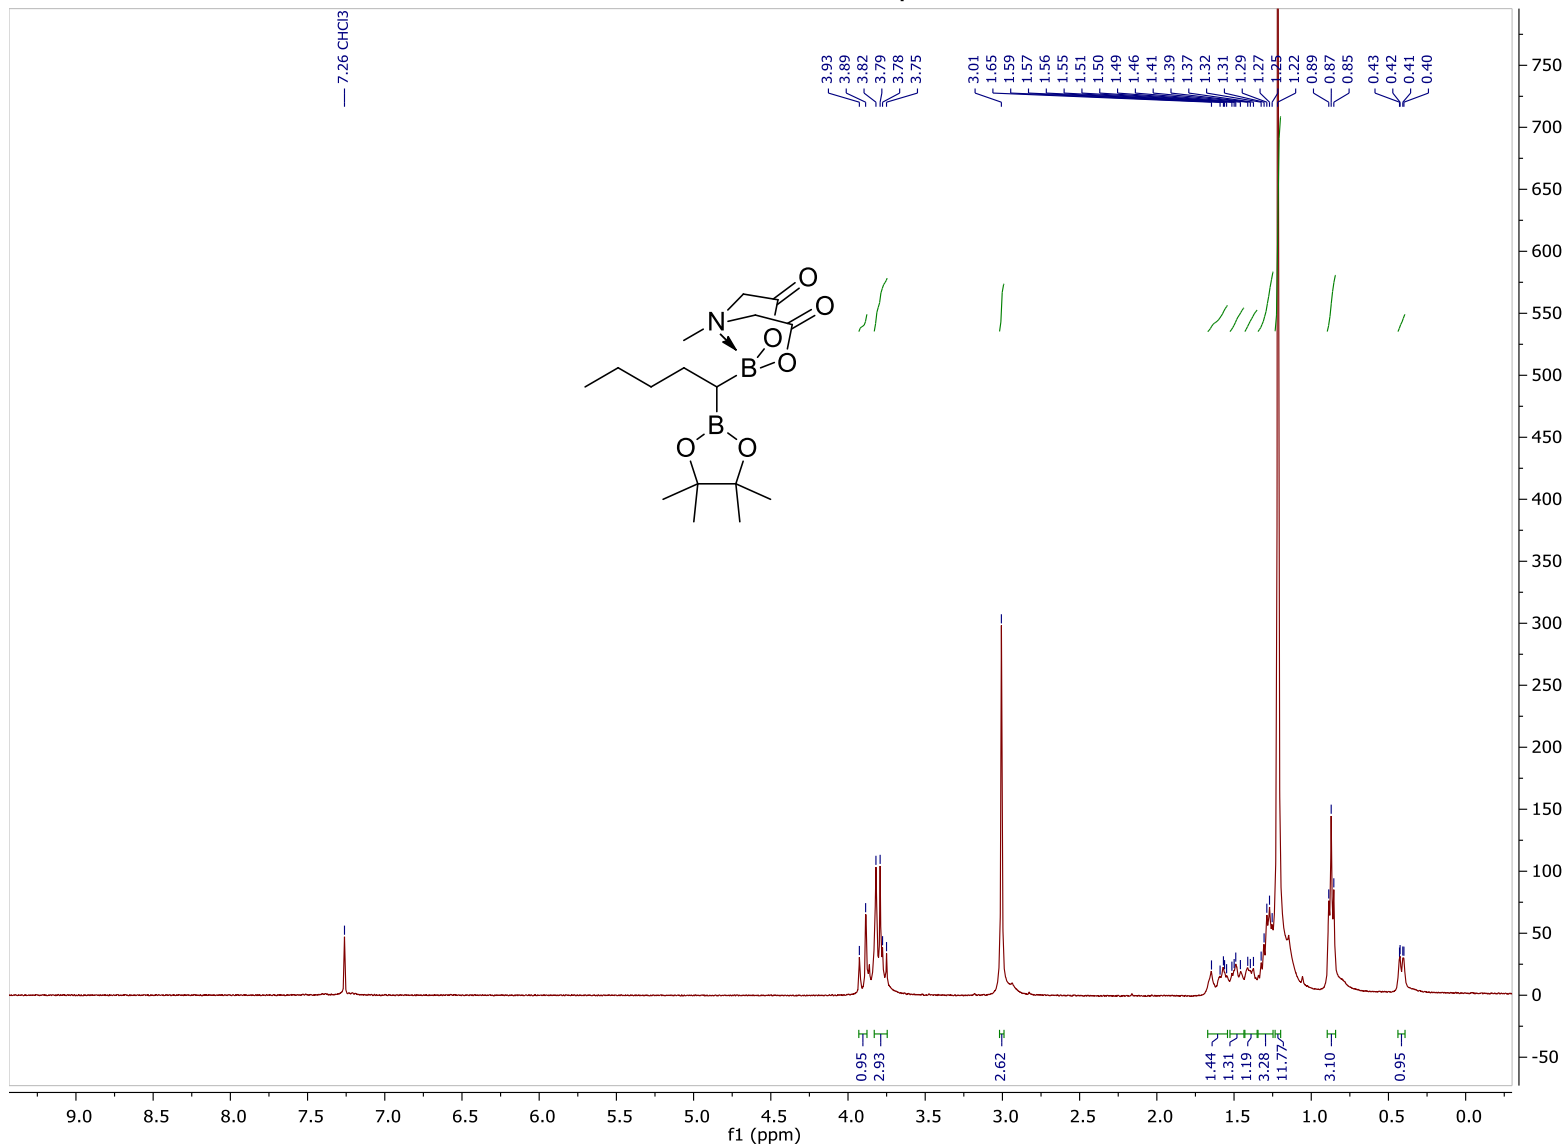

<sup>13</sup>C NMR, compound 3f

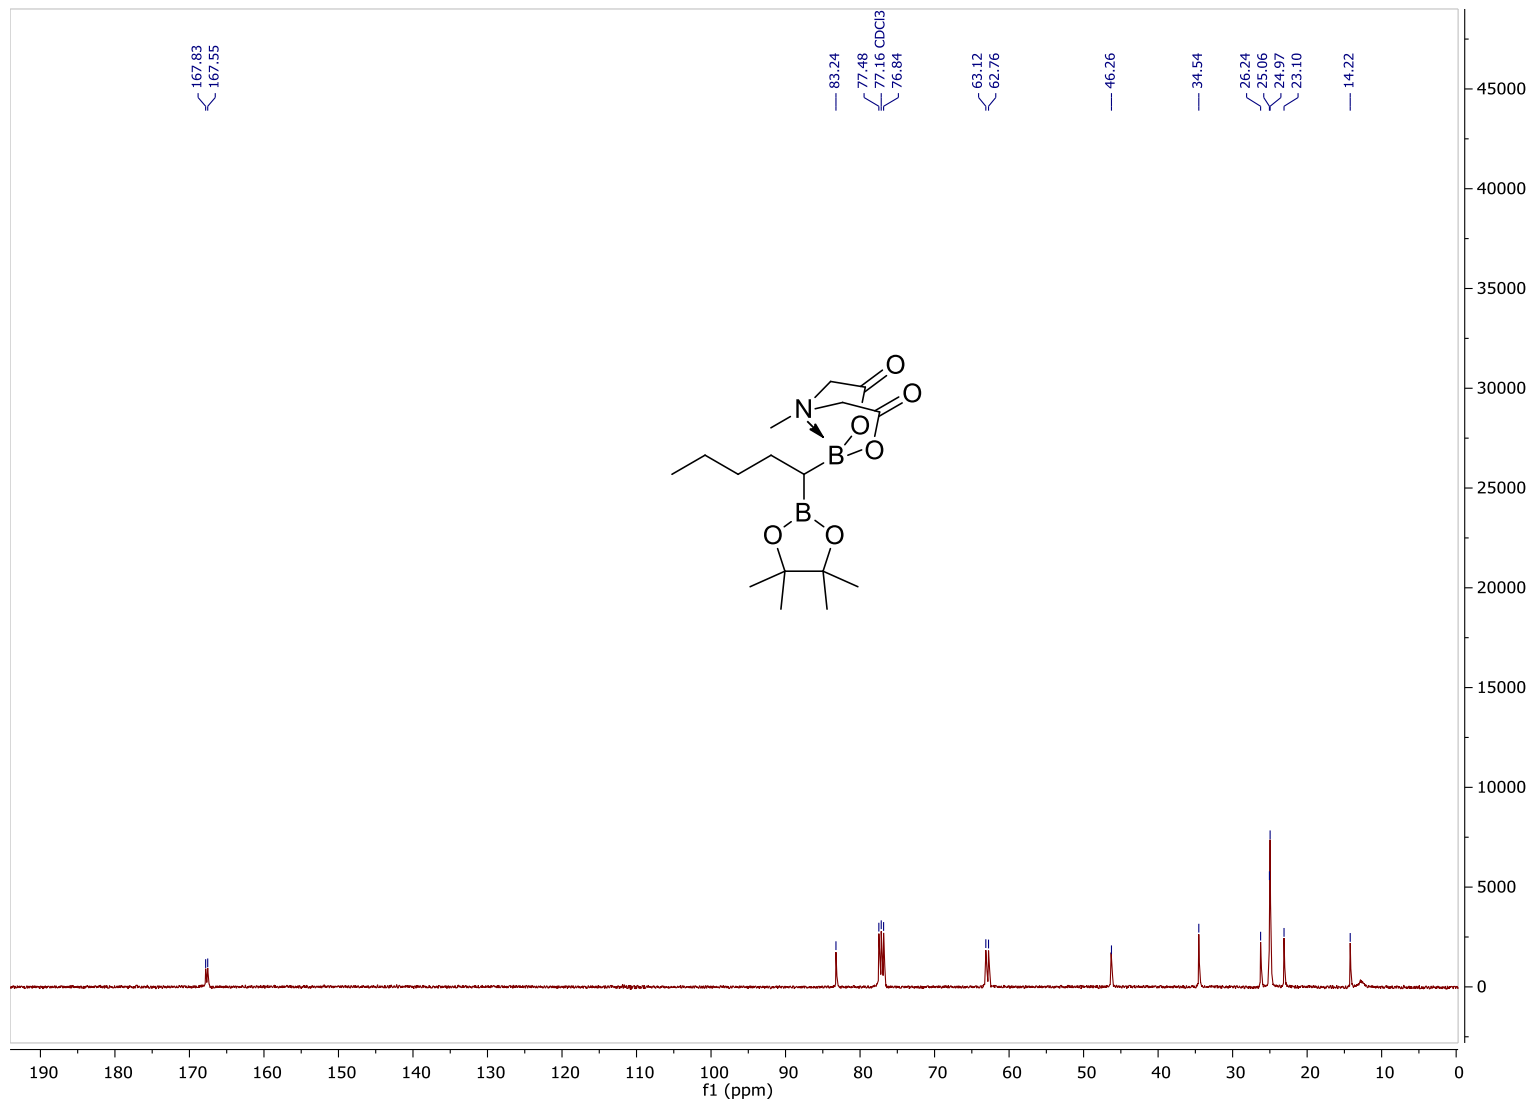

<sup>11</sup>B NMR, compound 3f

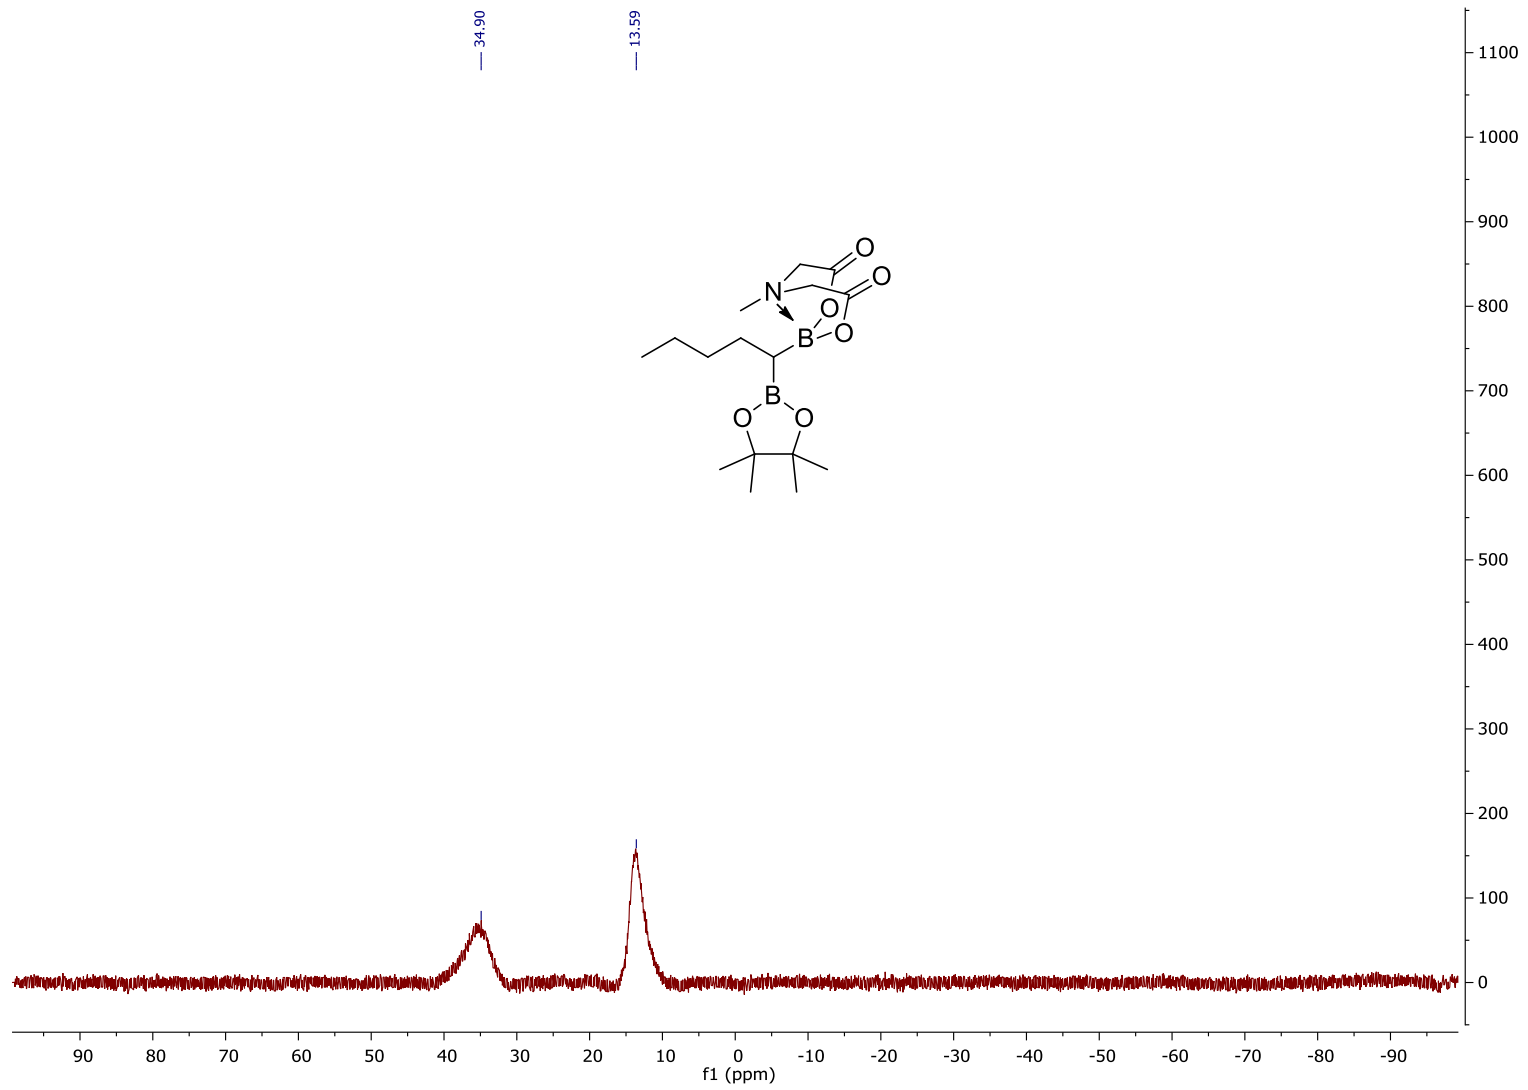

<sup>1</sup>H NMR, compound 3g

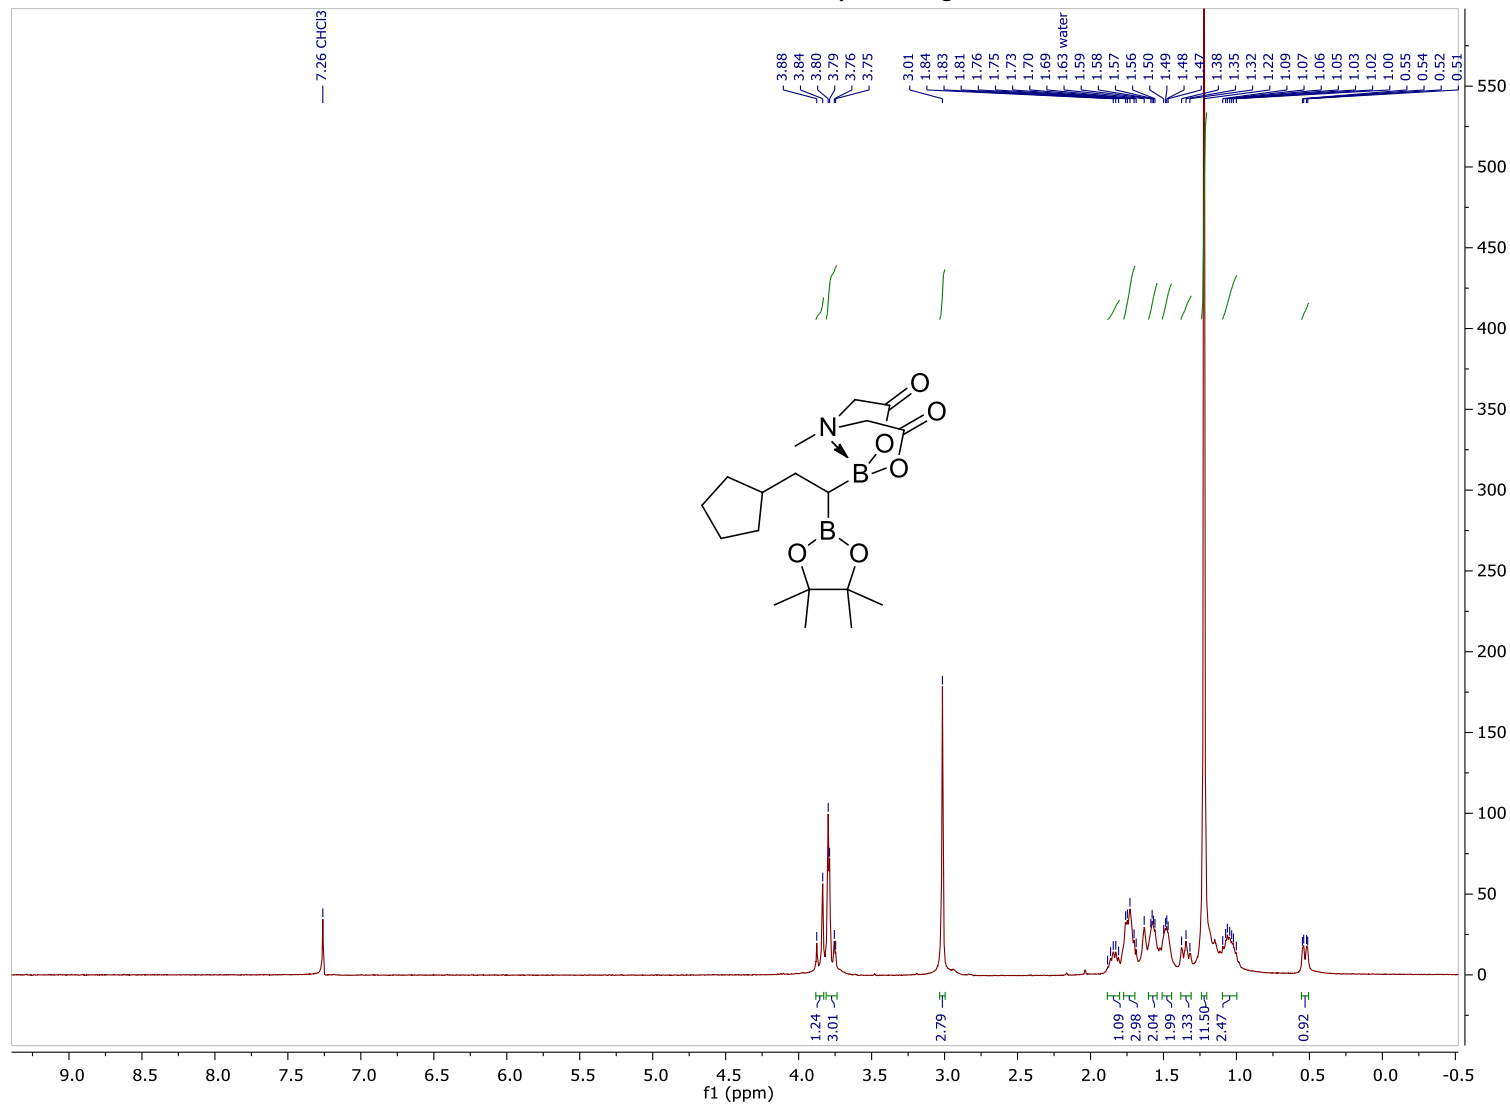

<sup>13</sup>C NMR, compound 3g

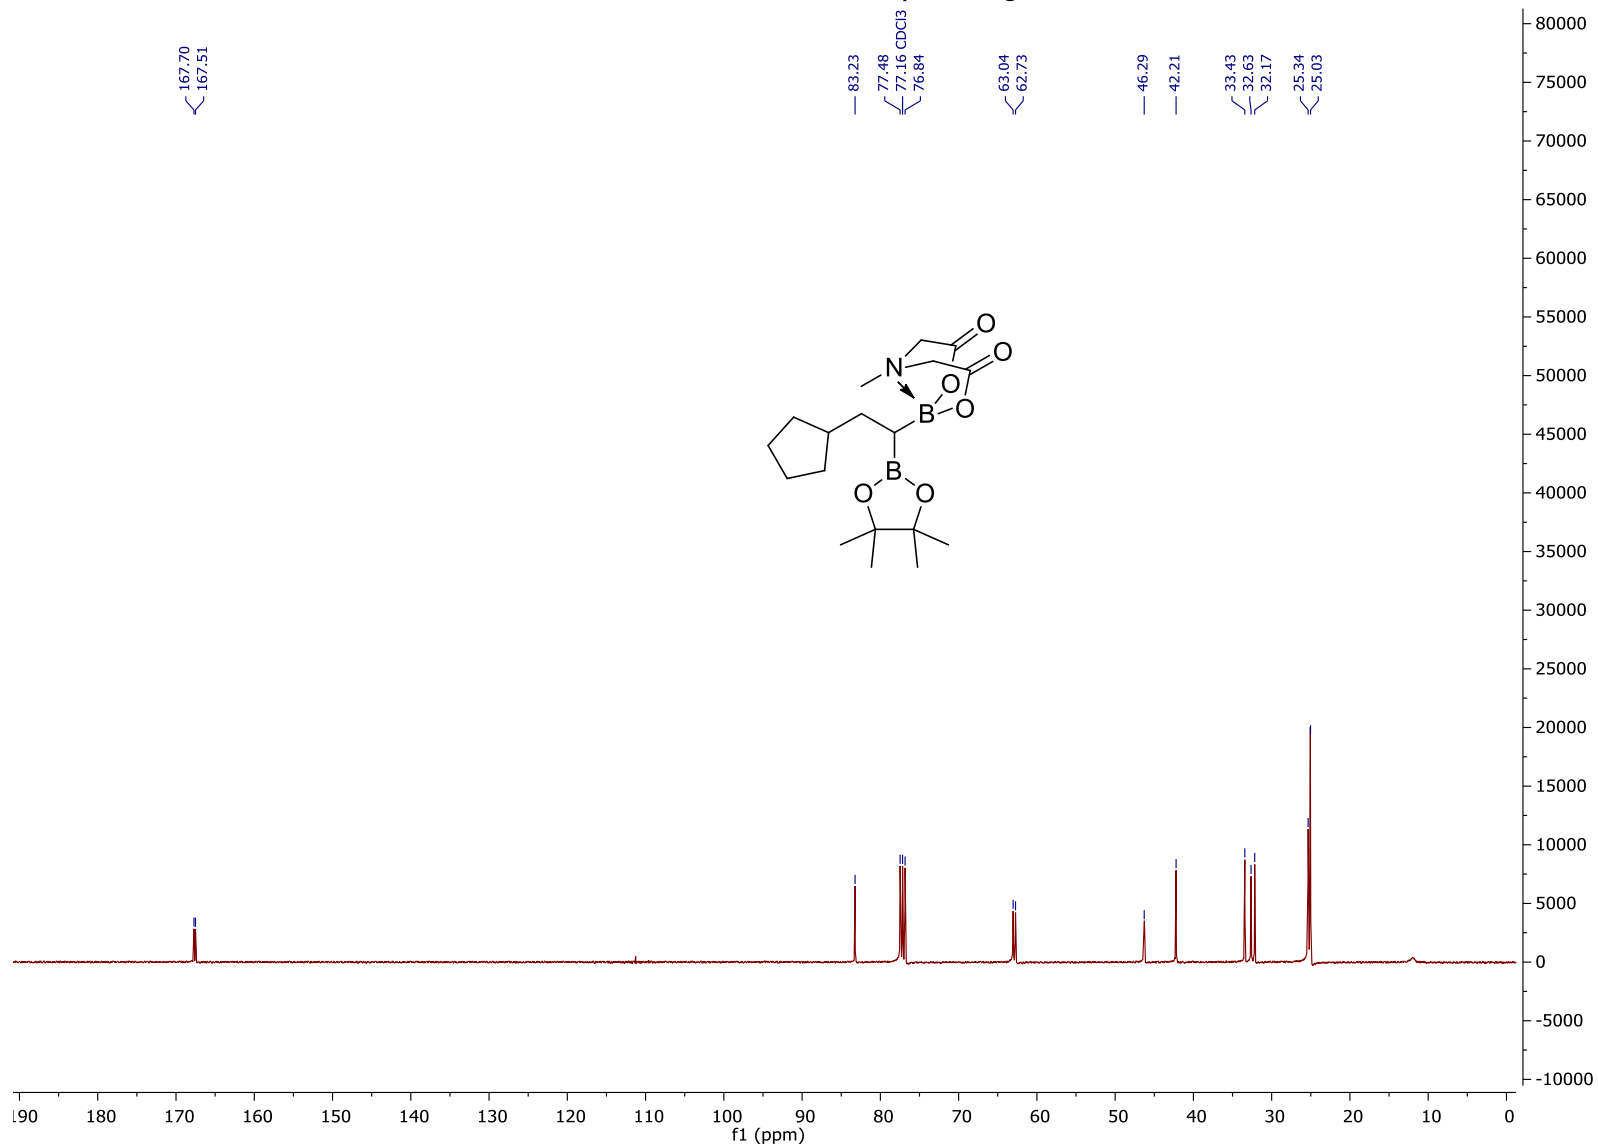

<sup>11</sup>B NMR, compound 3g

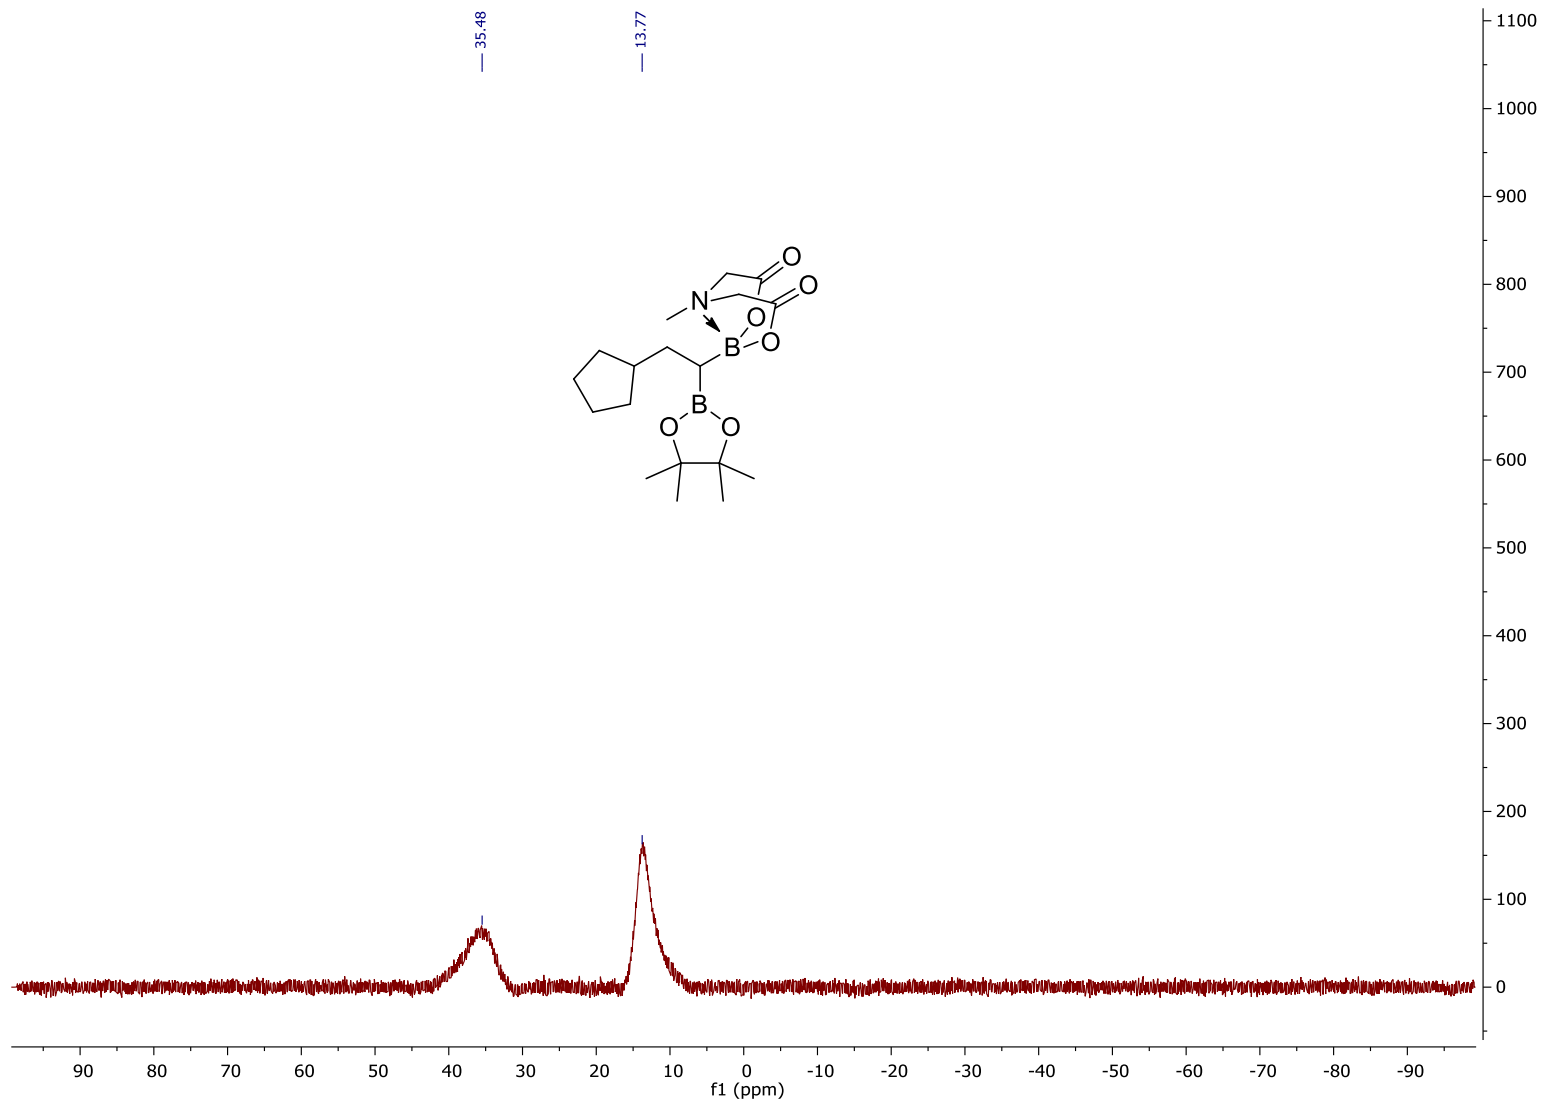

<sup>1</sup>H NMR, compound 3h

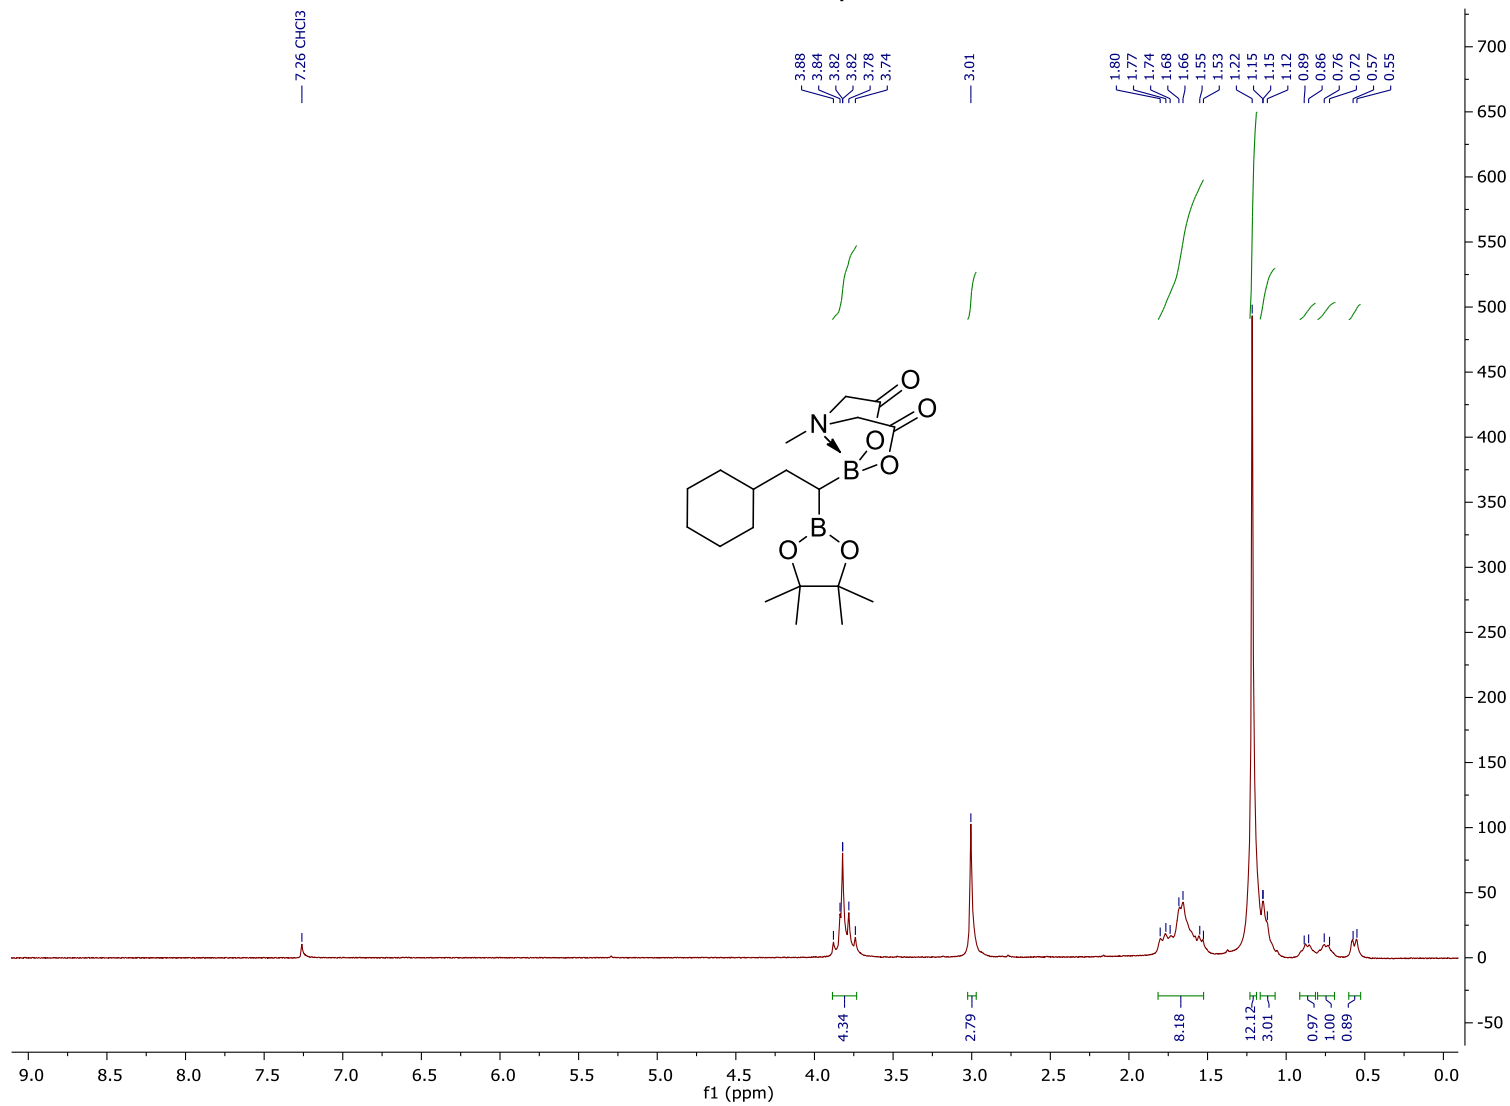



<sup>13</sup>C NMR, compound 3h

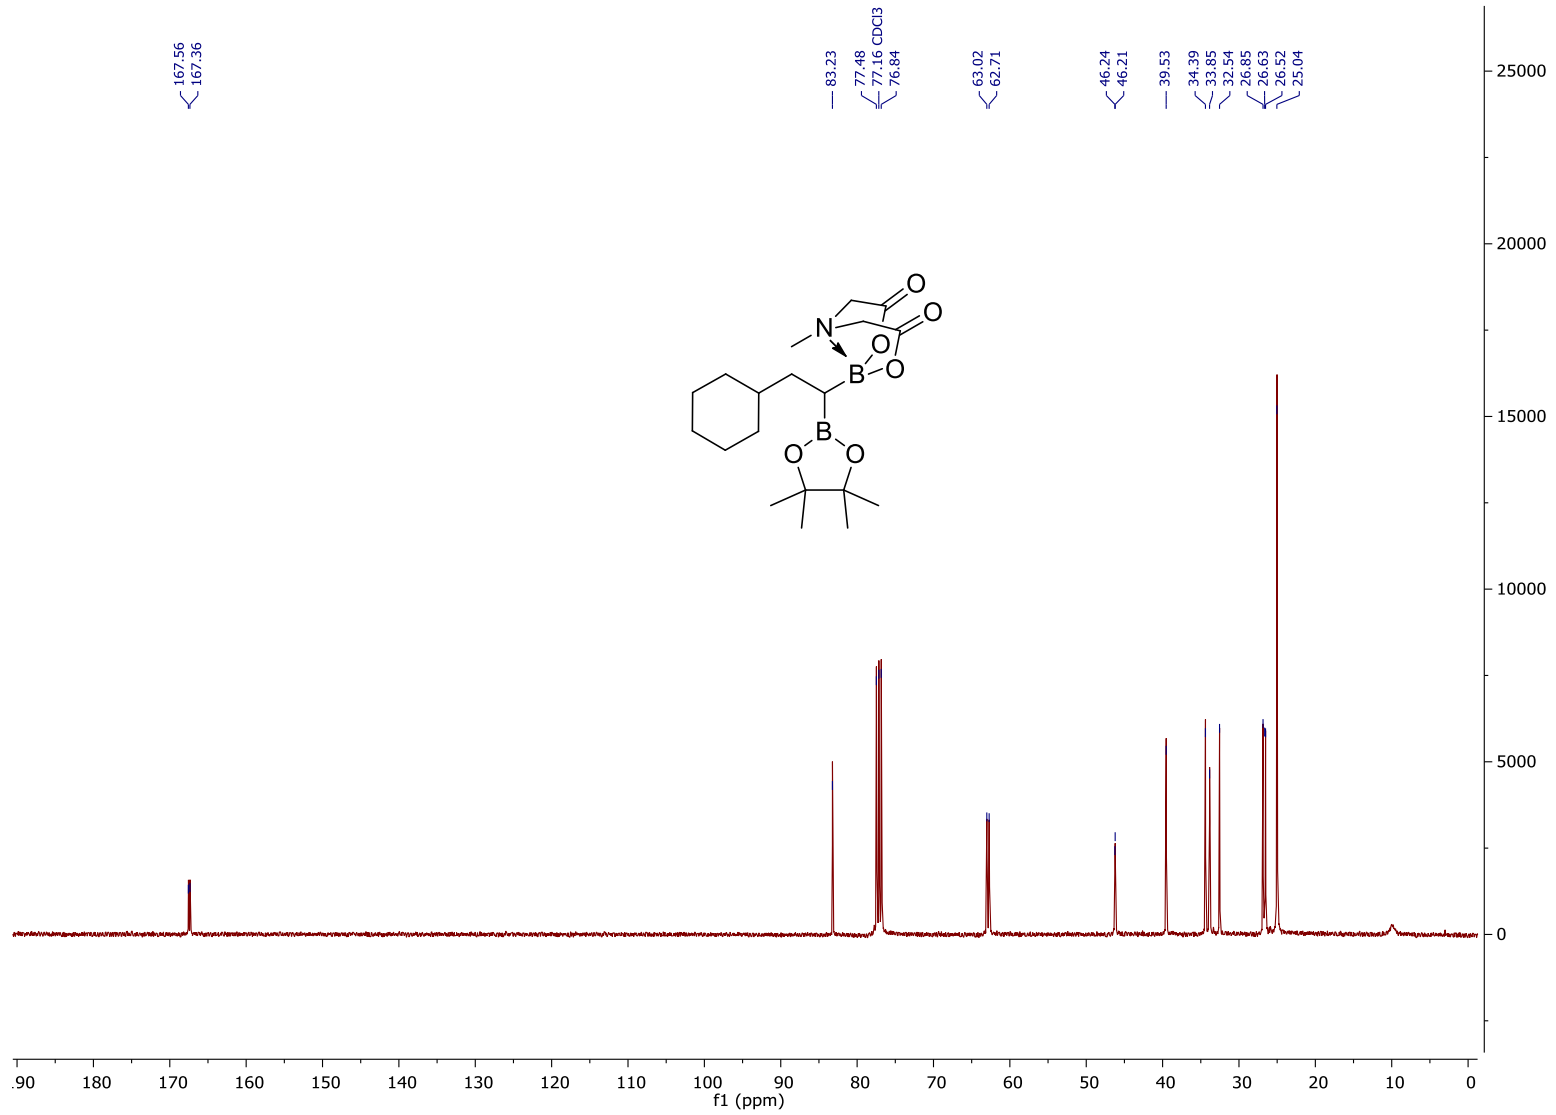

$^{11}\text{B}$  NMR, compound 3h

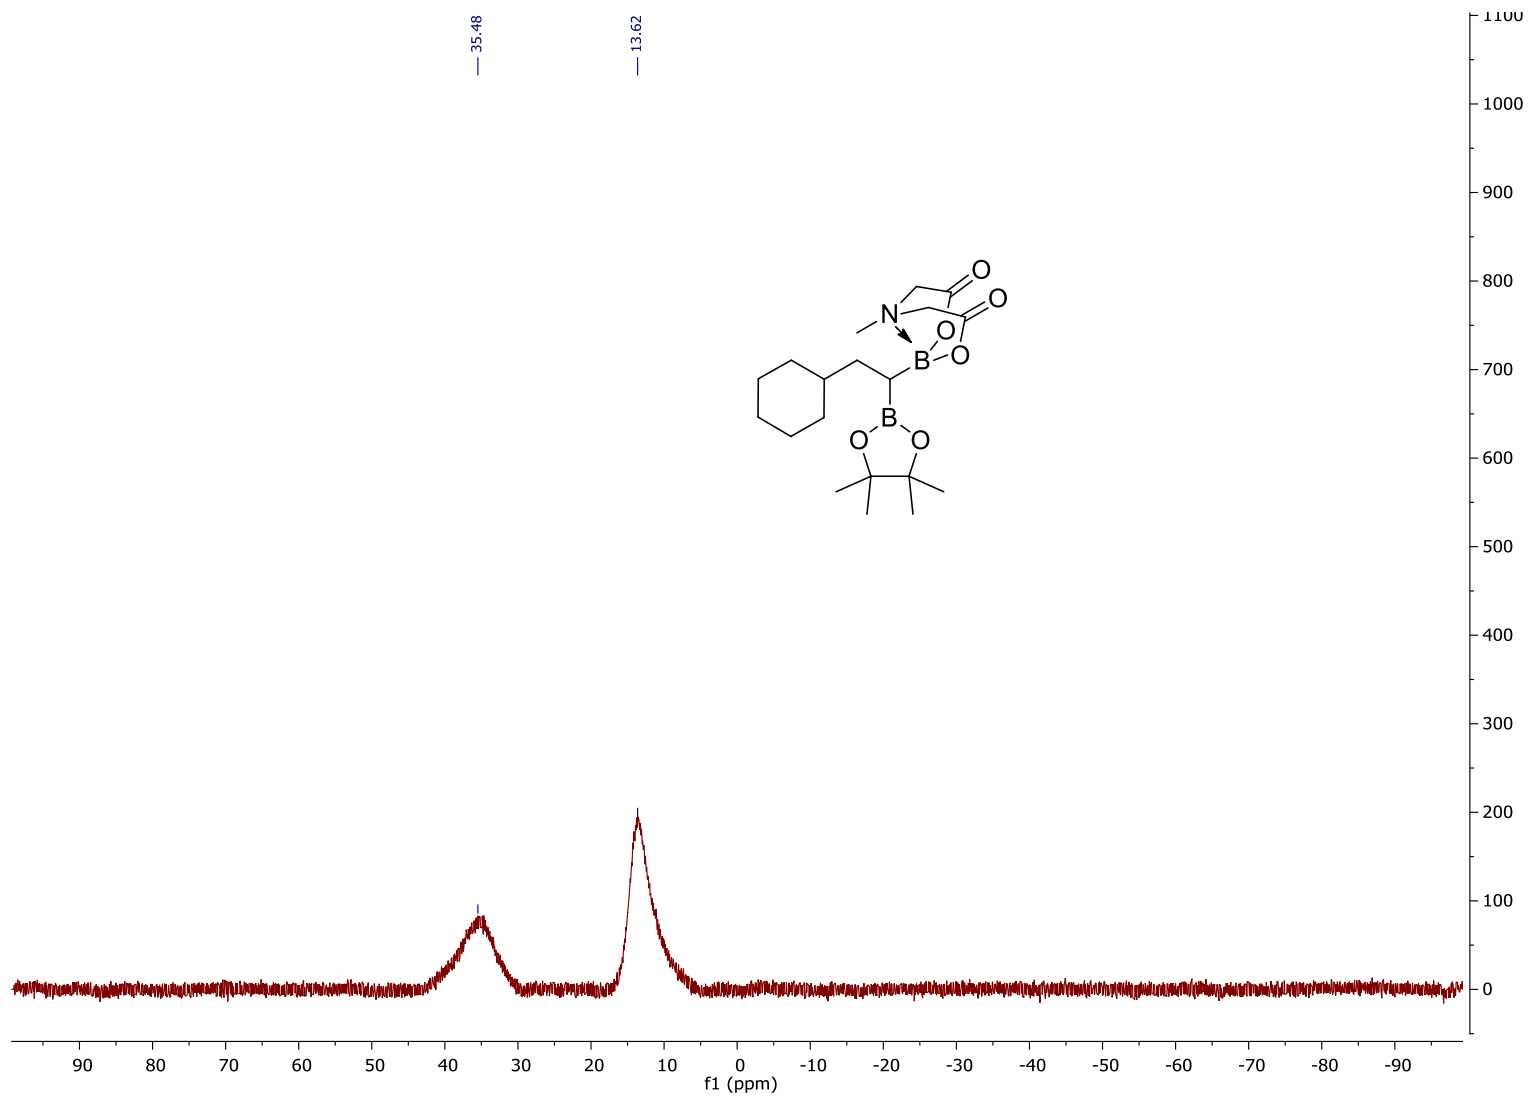

<sup>1</sup>H NMR, compound 3i

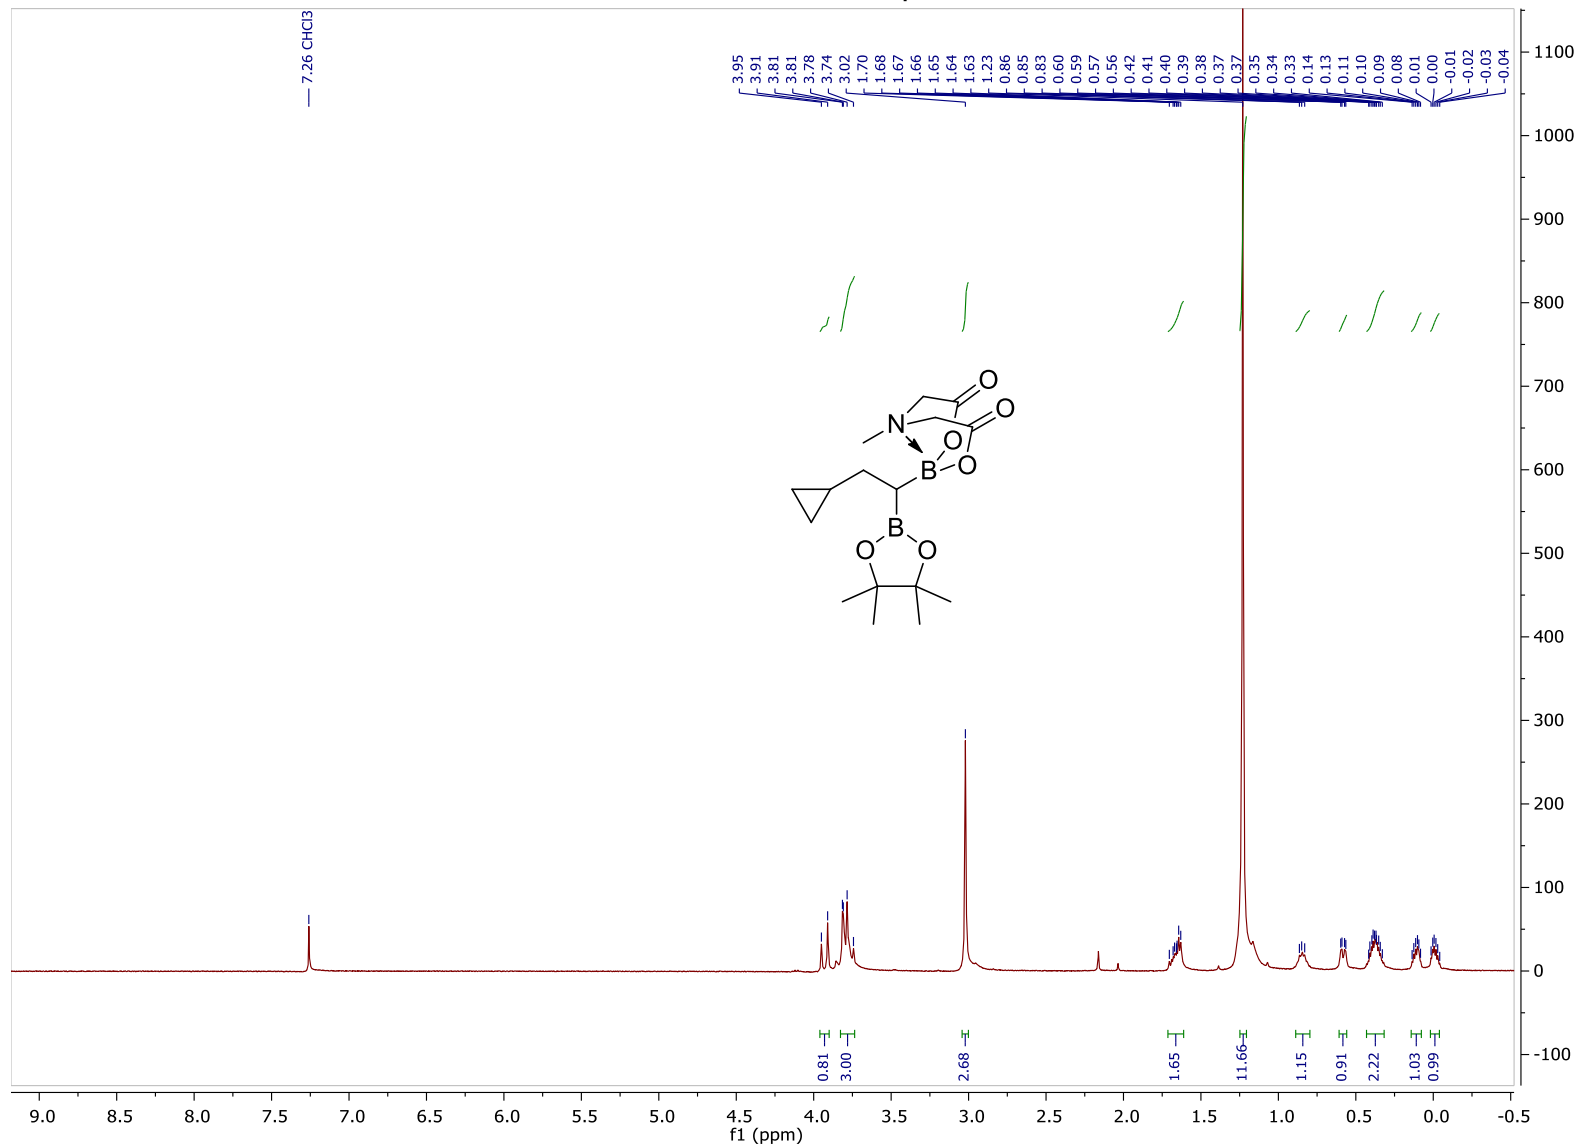

<sup>13</sup>C NMR, compound 3i

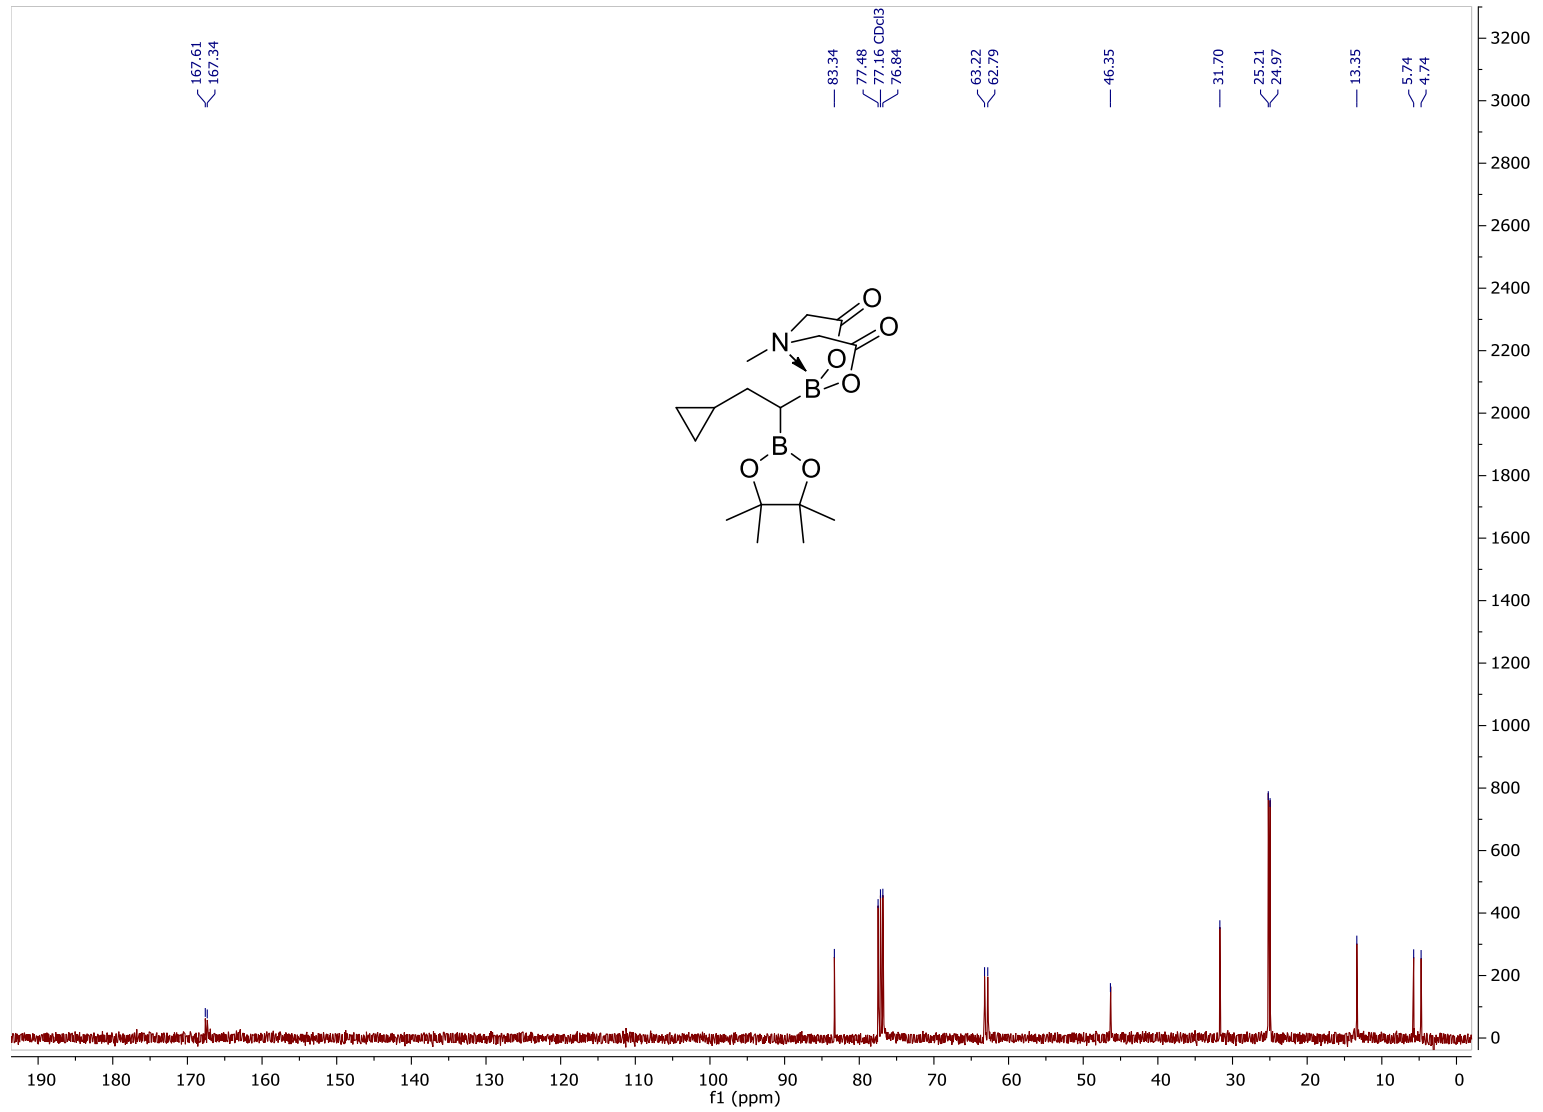

<sup>11</sup>B NMR, compound 3i

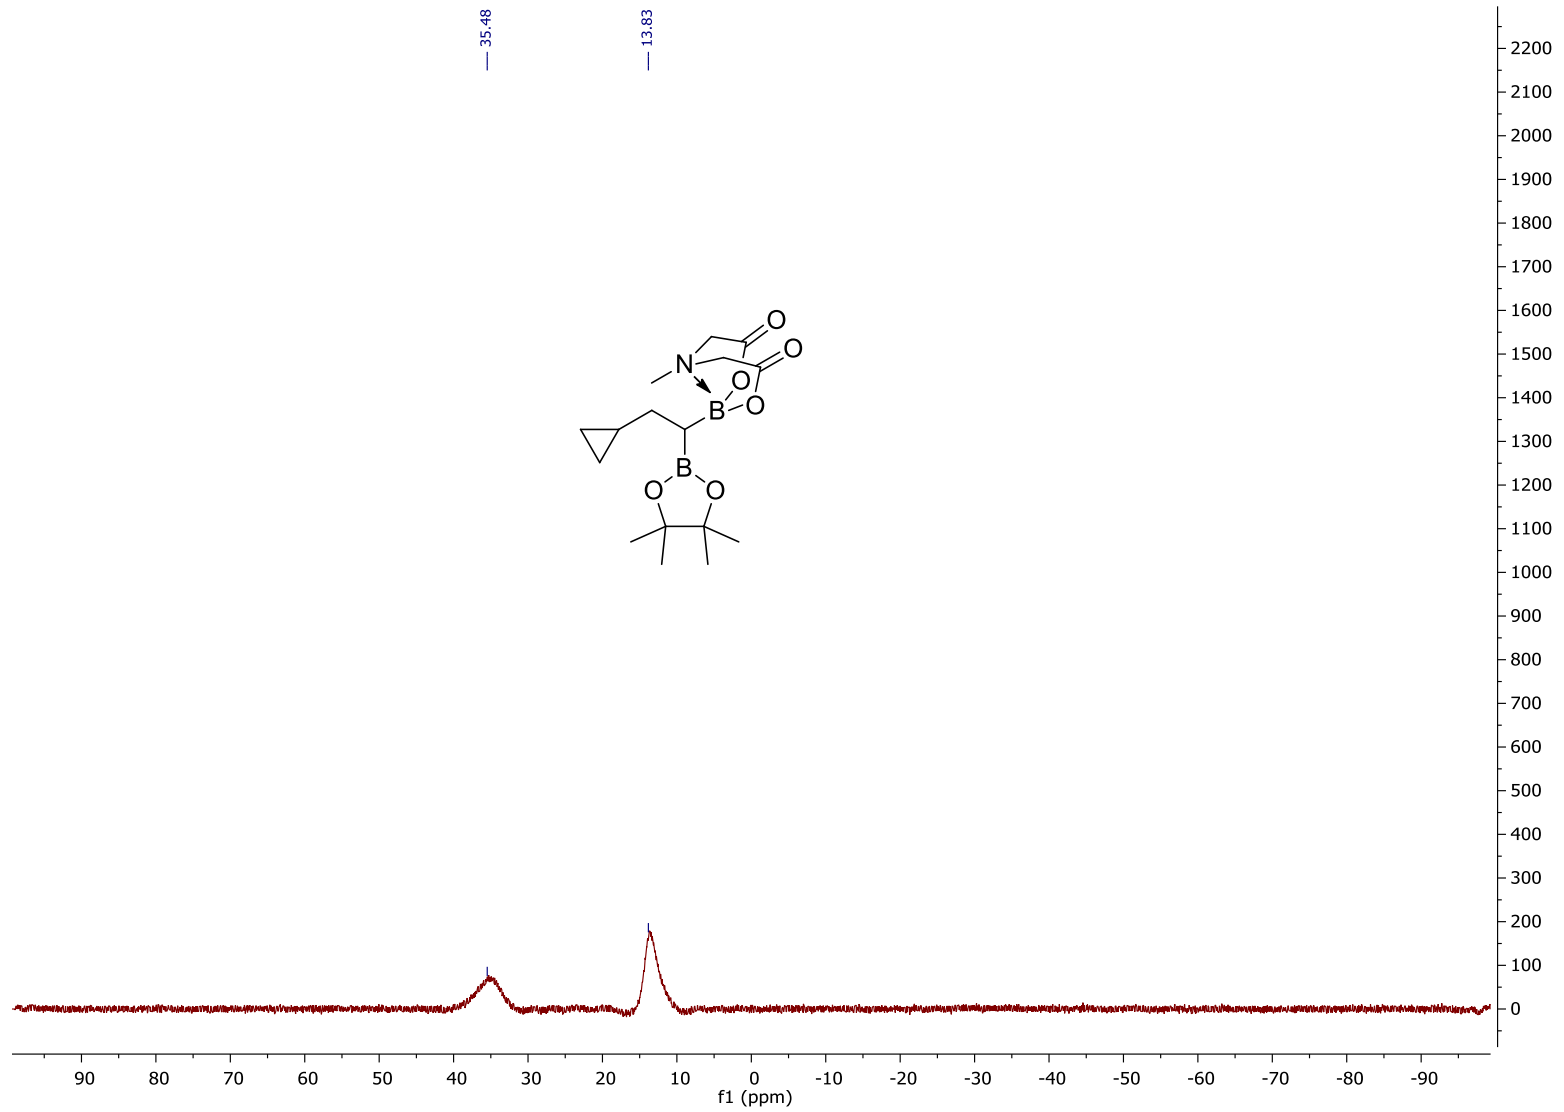

<sup>1</sup>H NMR, compound 3j

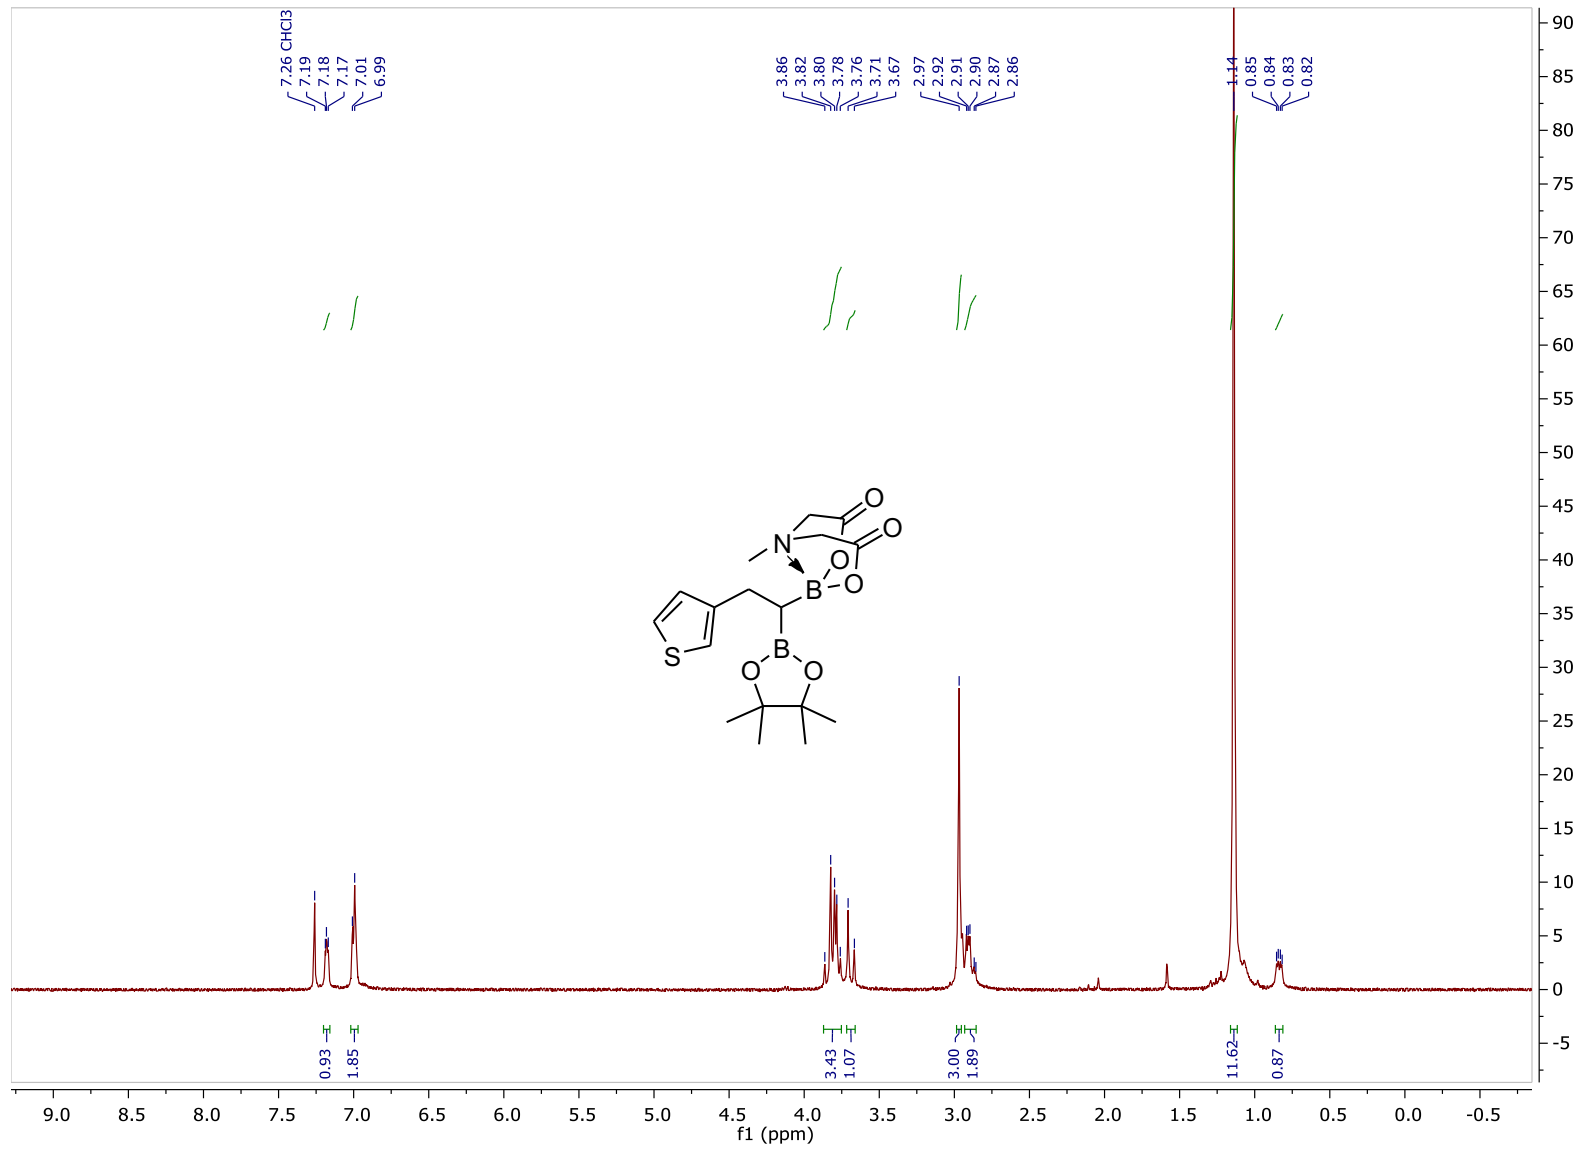

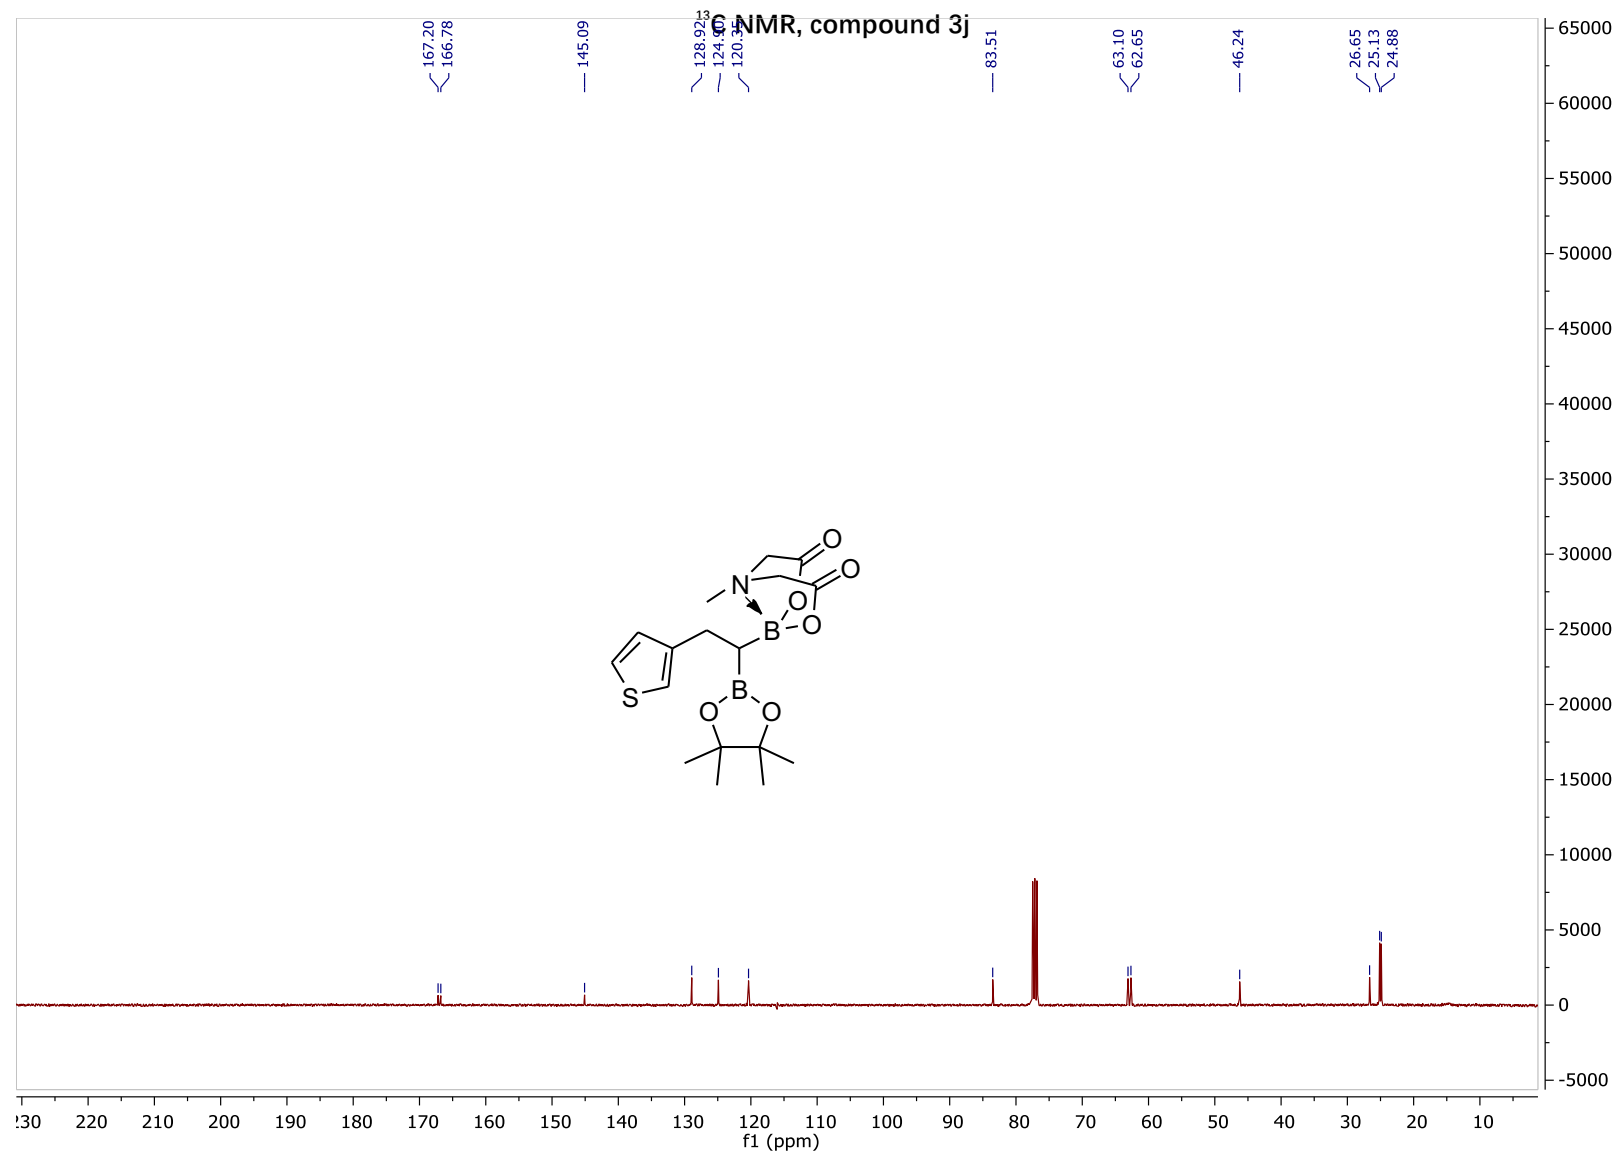

<sup>11</sup>B NMR, compound 3j

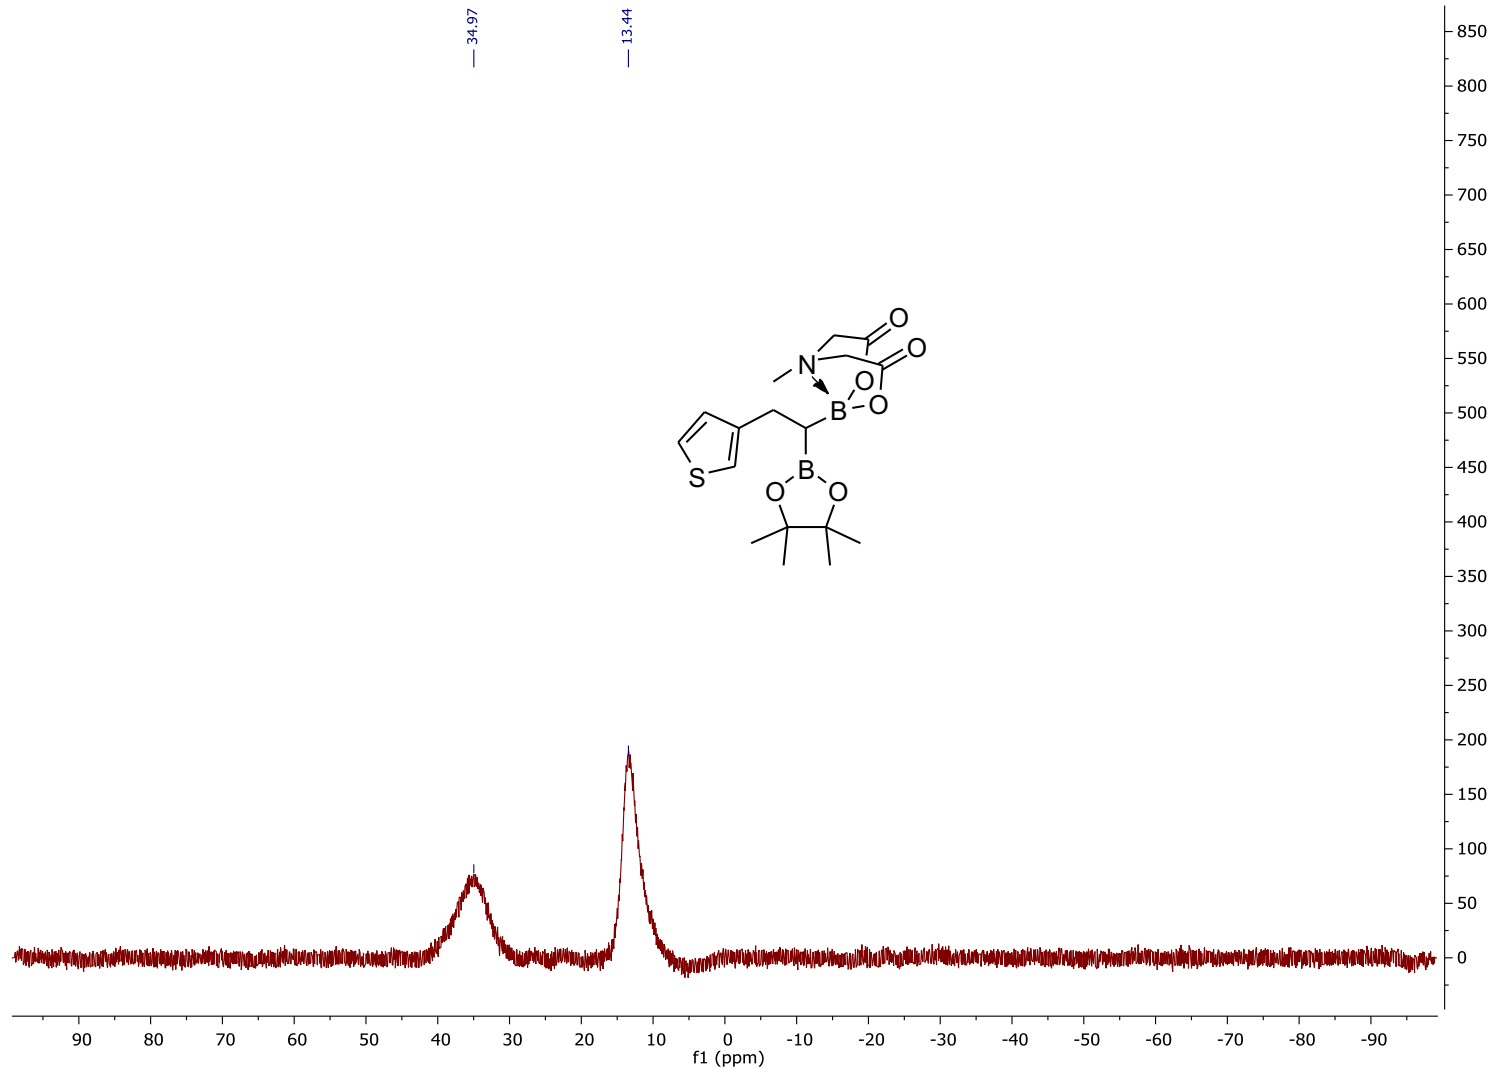



<sup>1</sup>H NMR, compound 3k

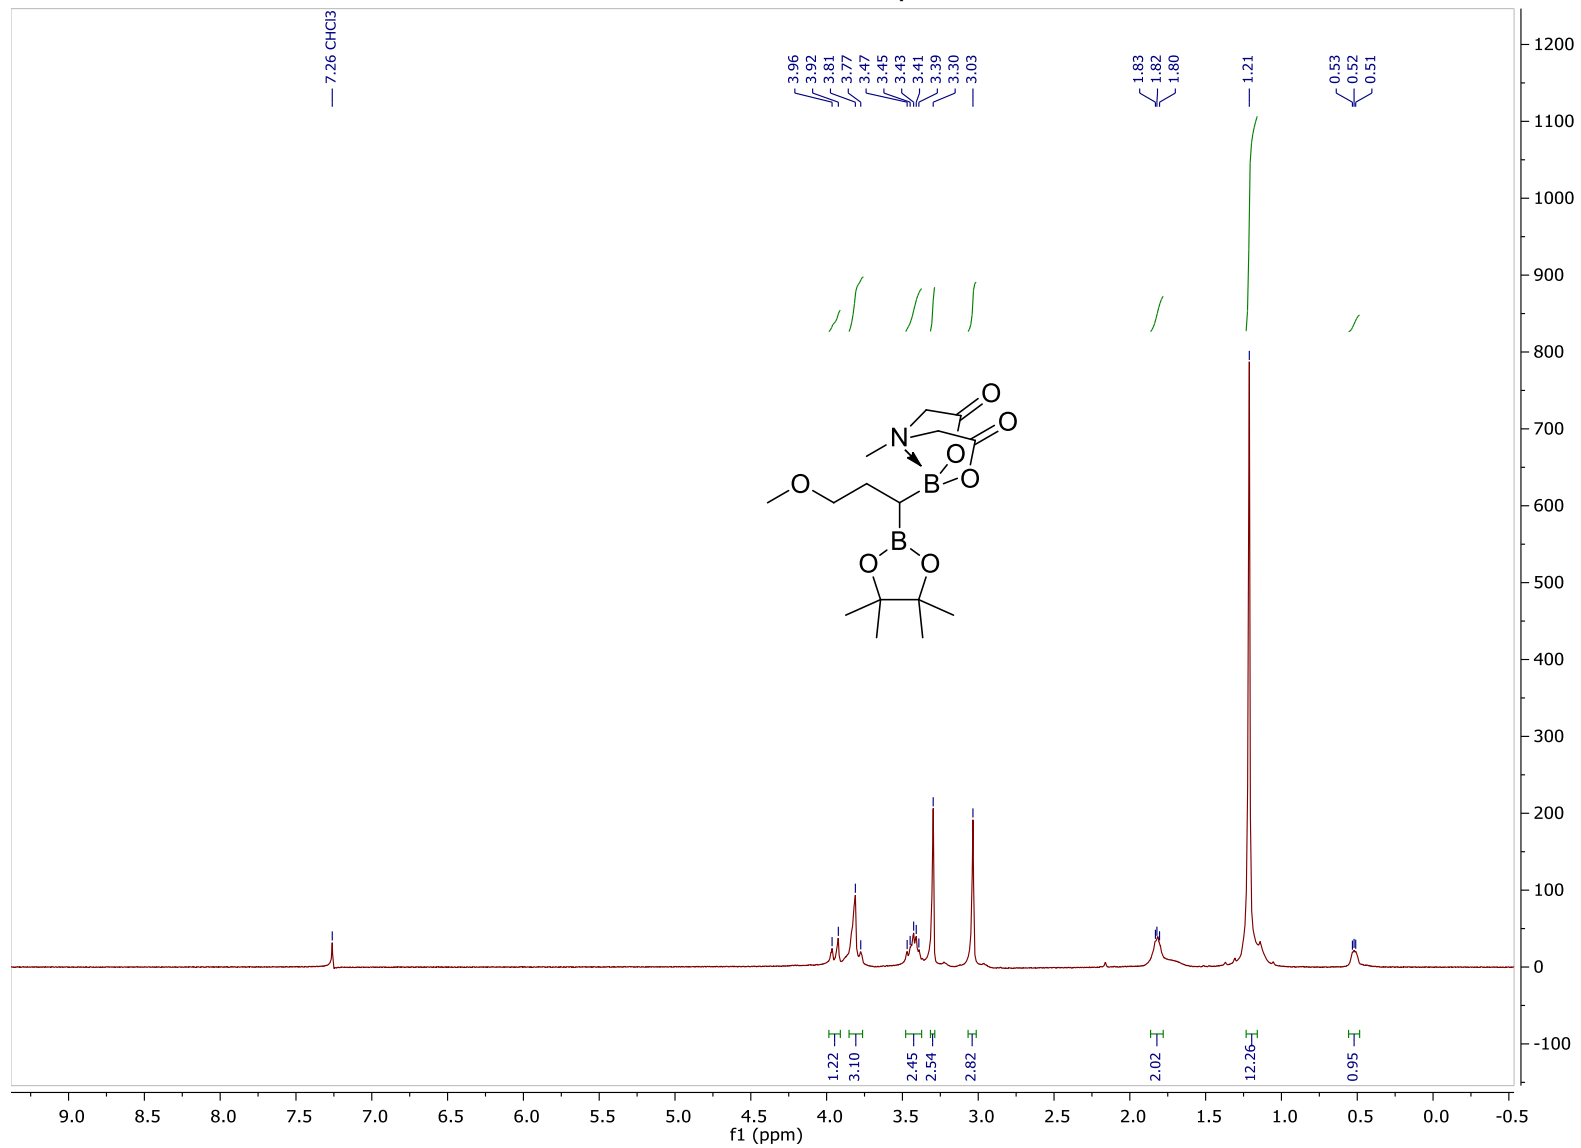

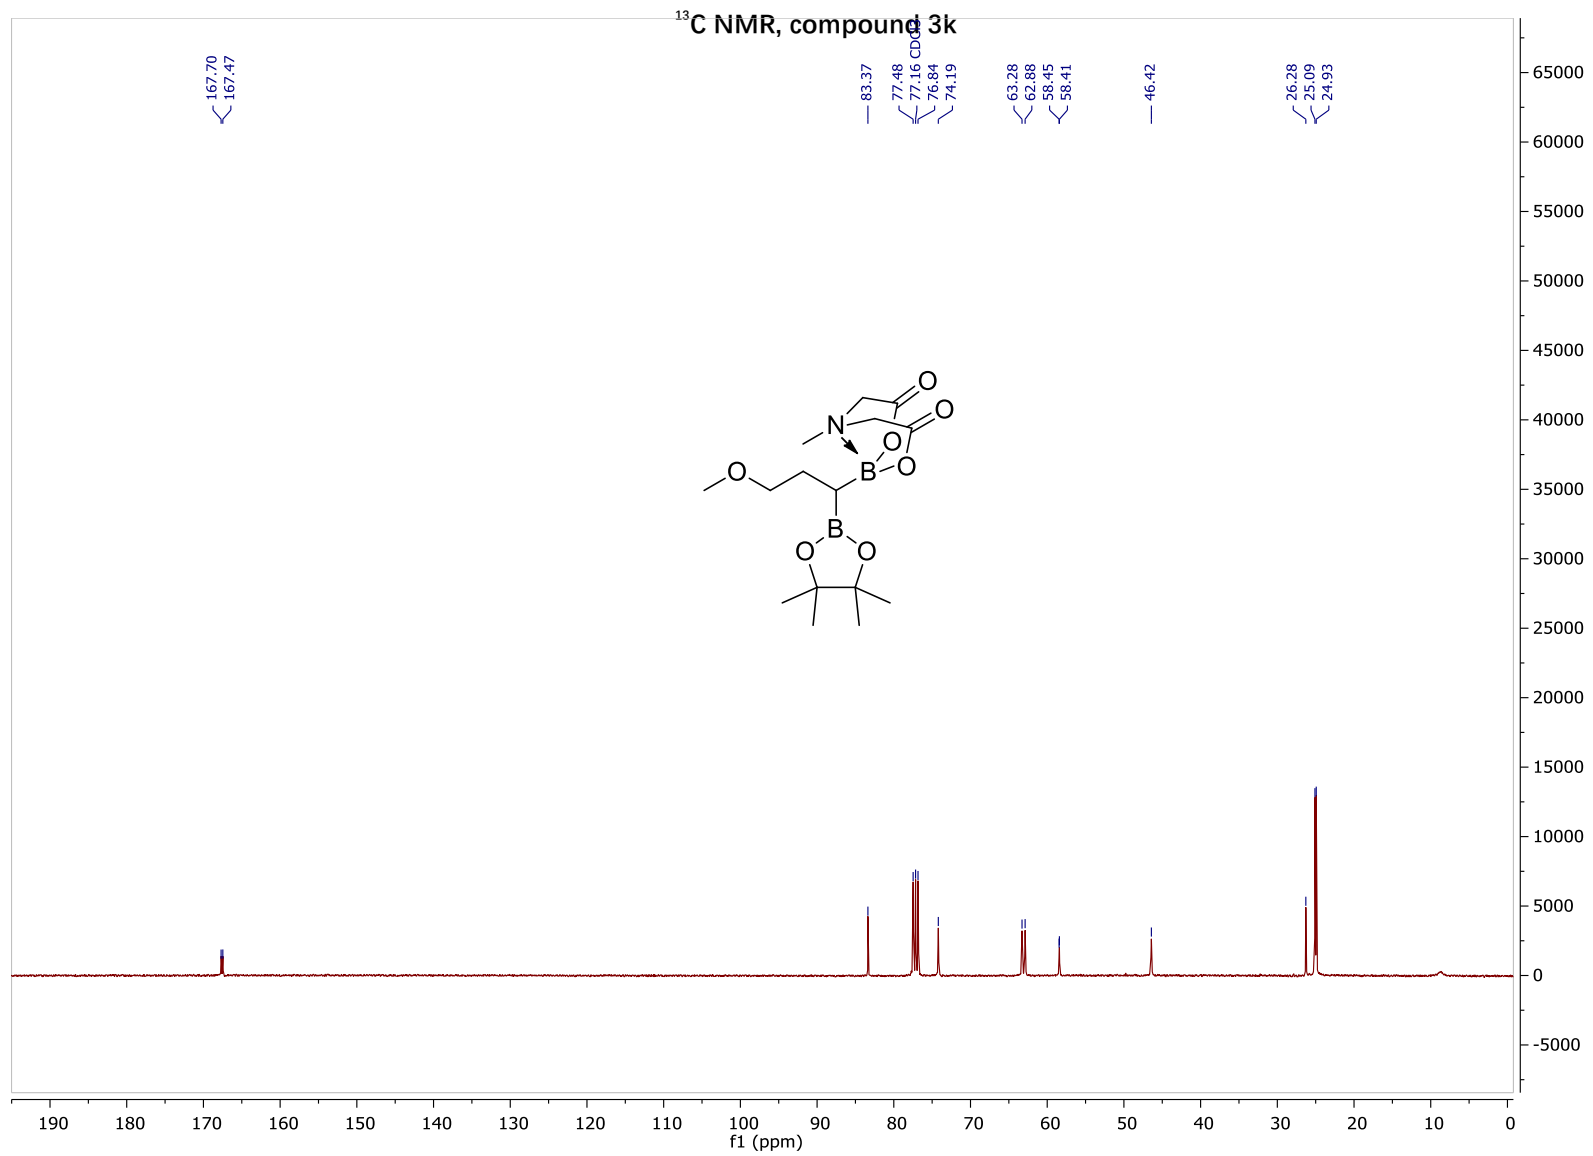

<sup>11</sup>B NMR, compound 3k

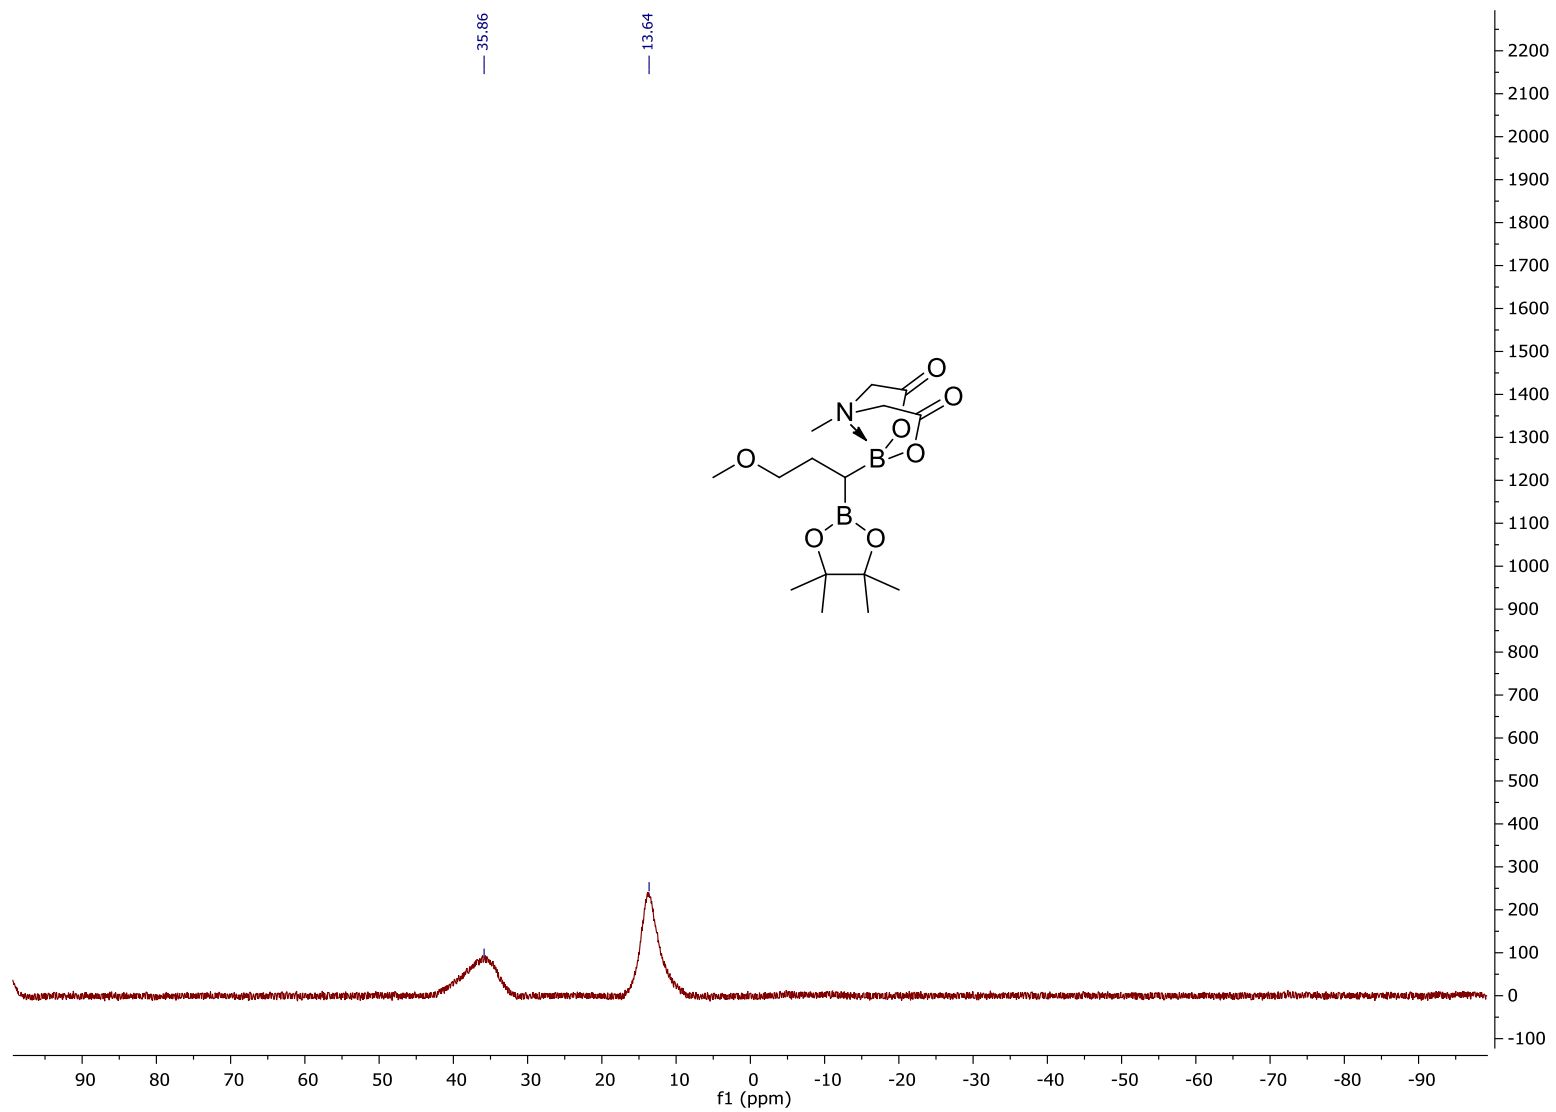

<sup>1</sup>H NMR, compound 3I

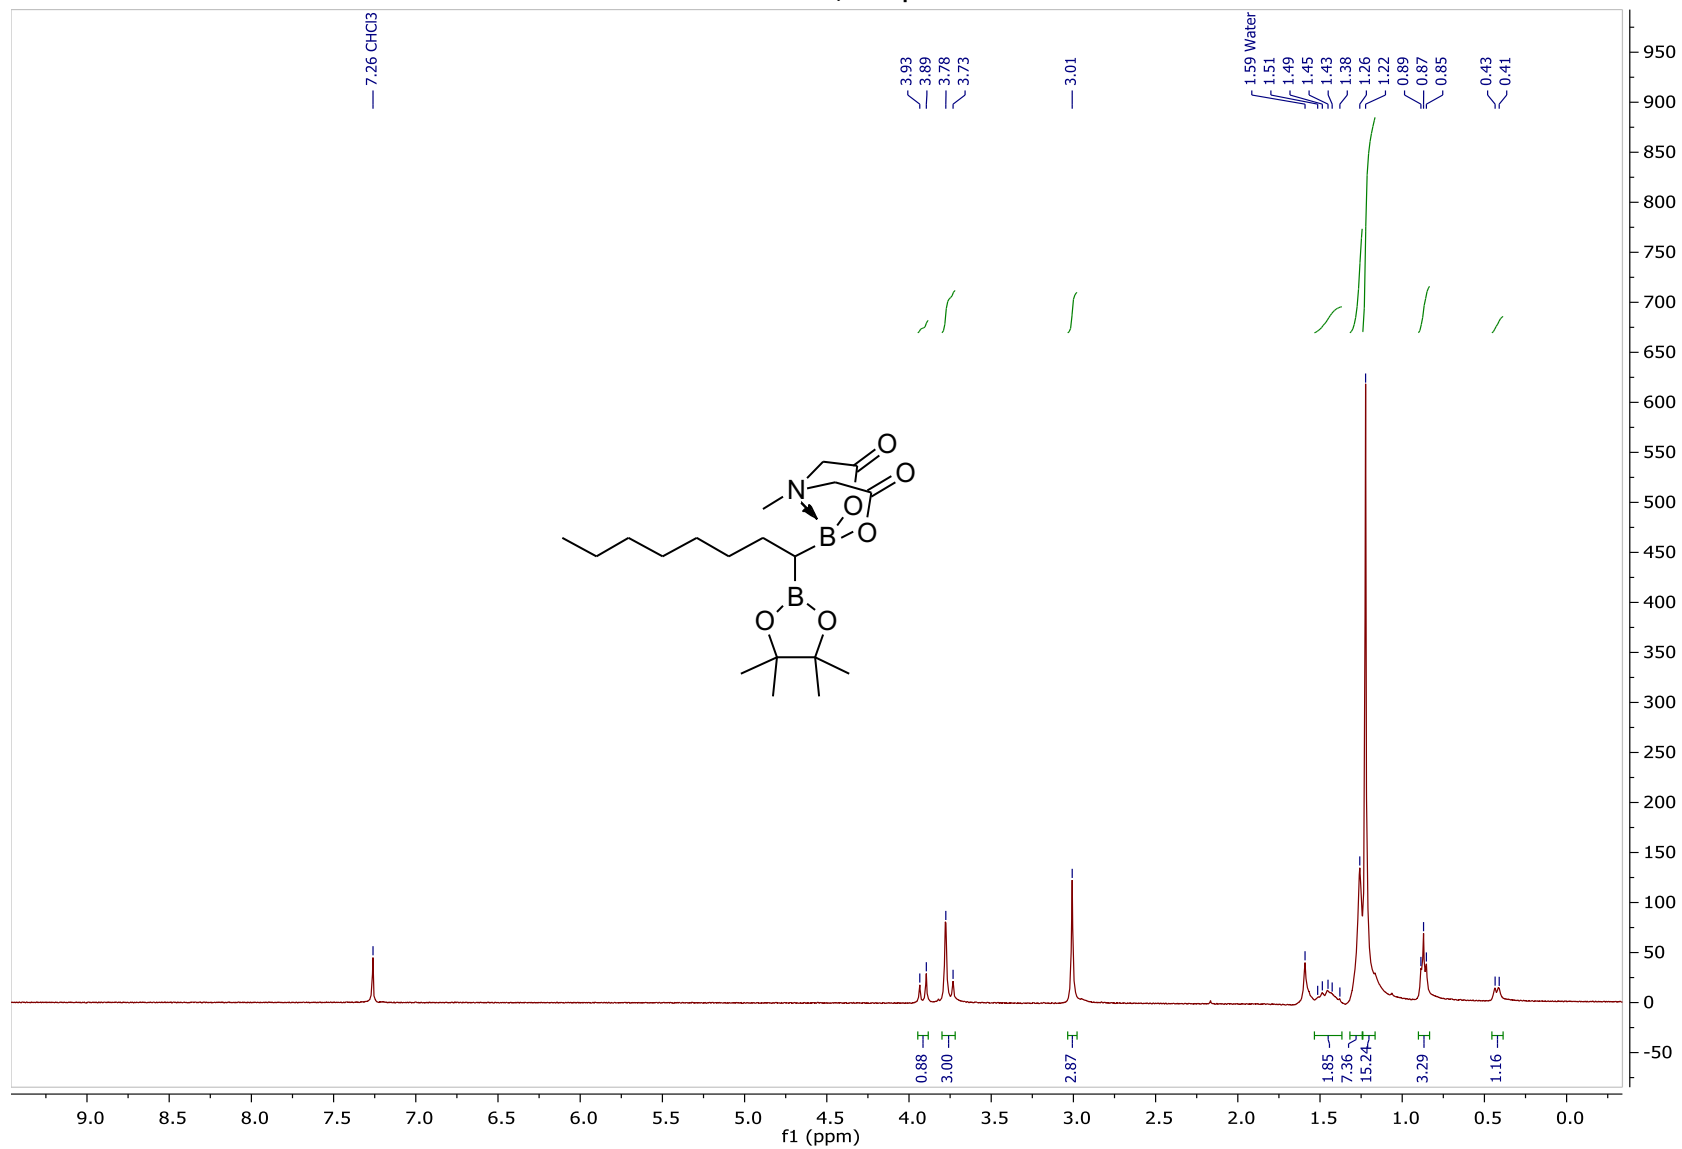

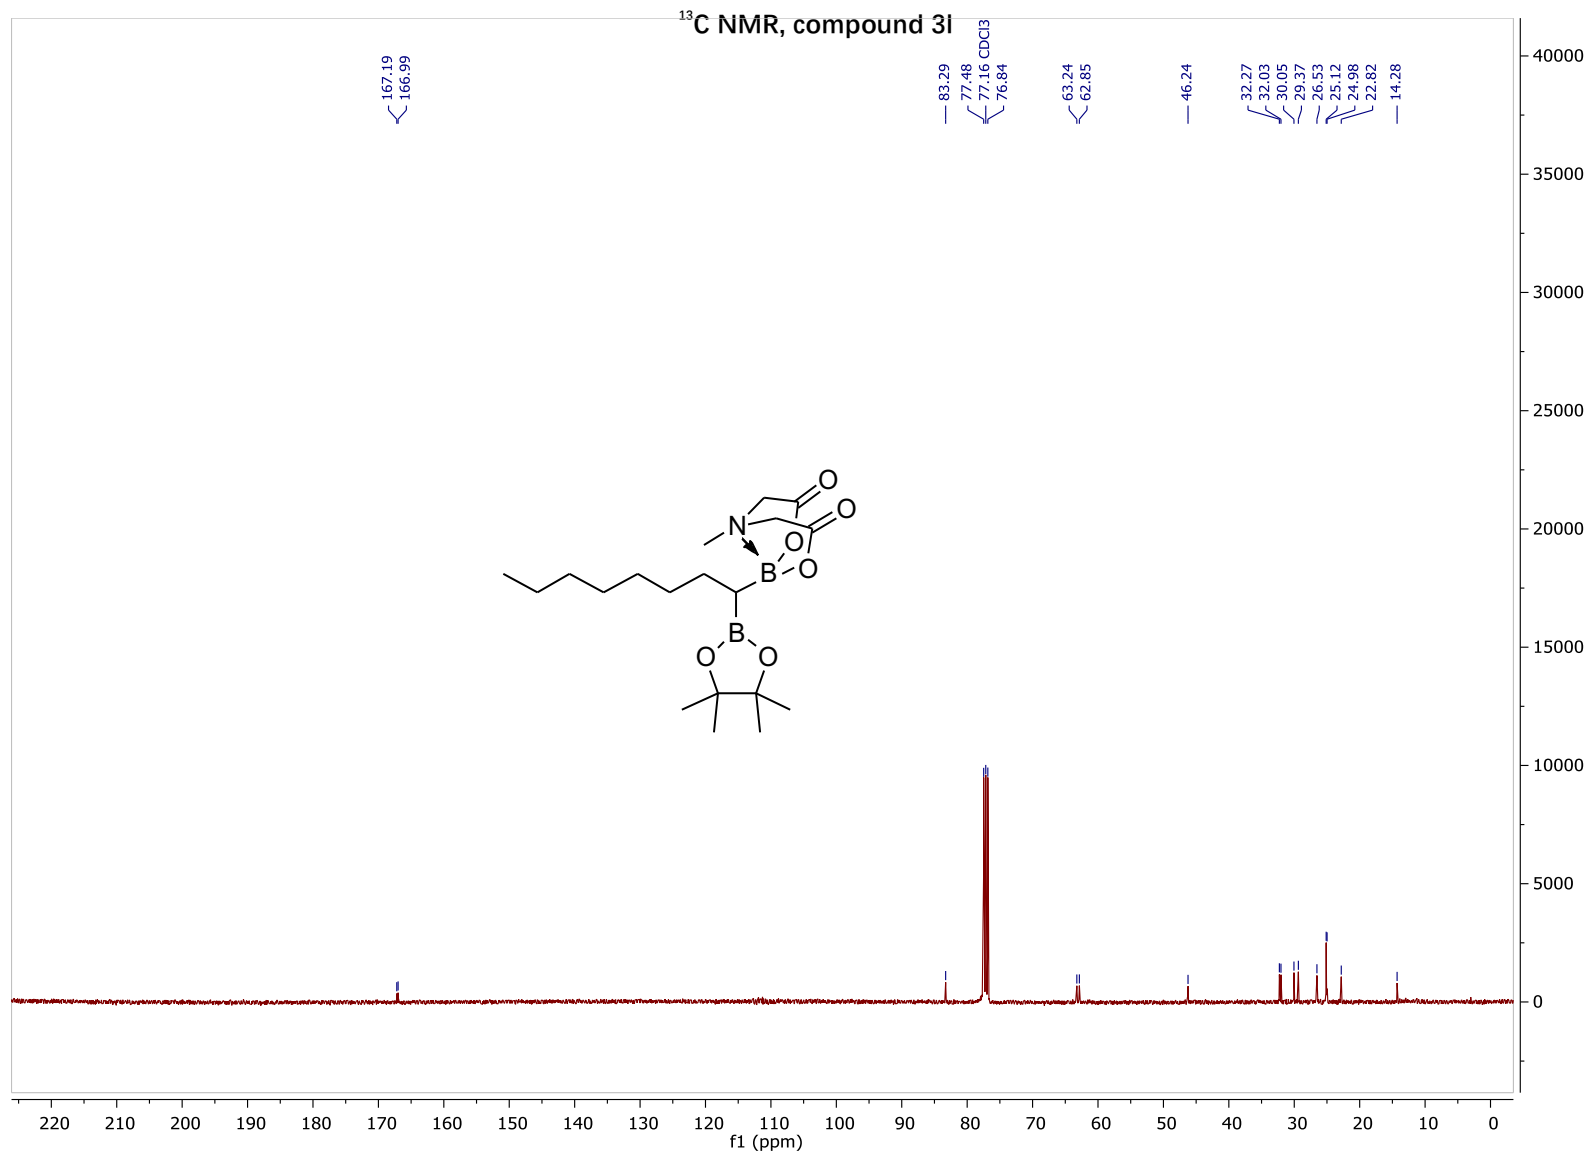

<sup>11</sup>B NMR, compound 3I

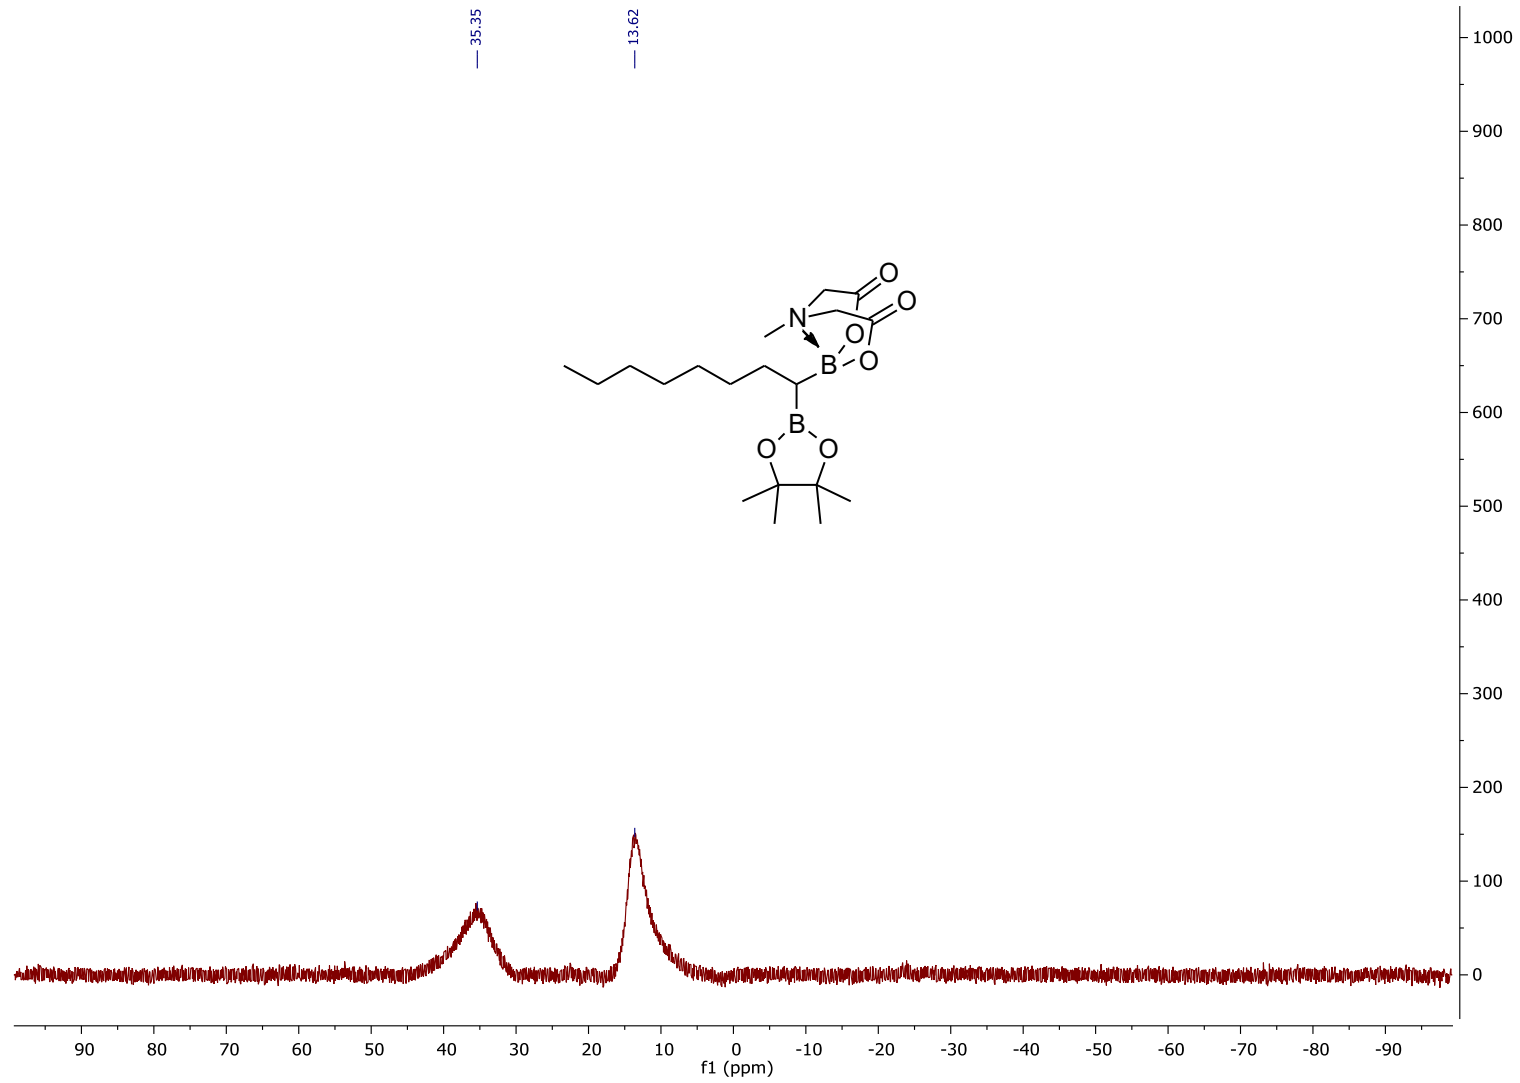

<sup>1</sup>H NMR, compound 3m

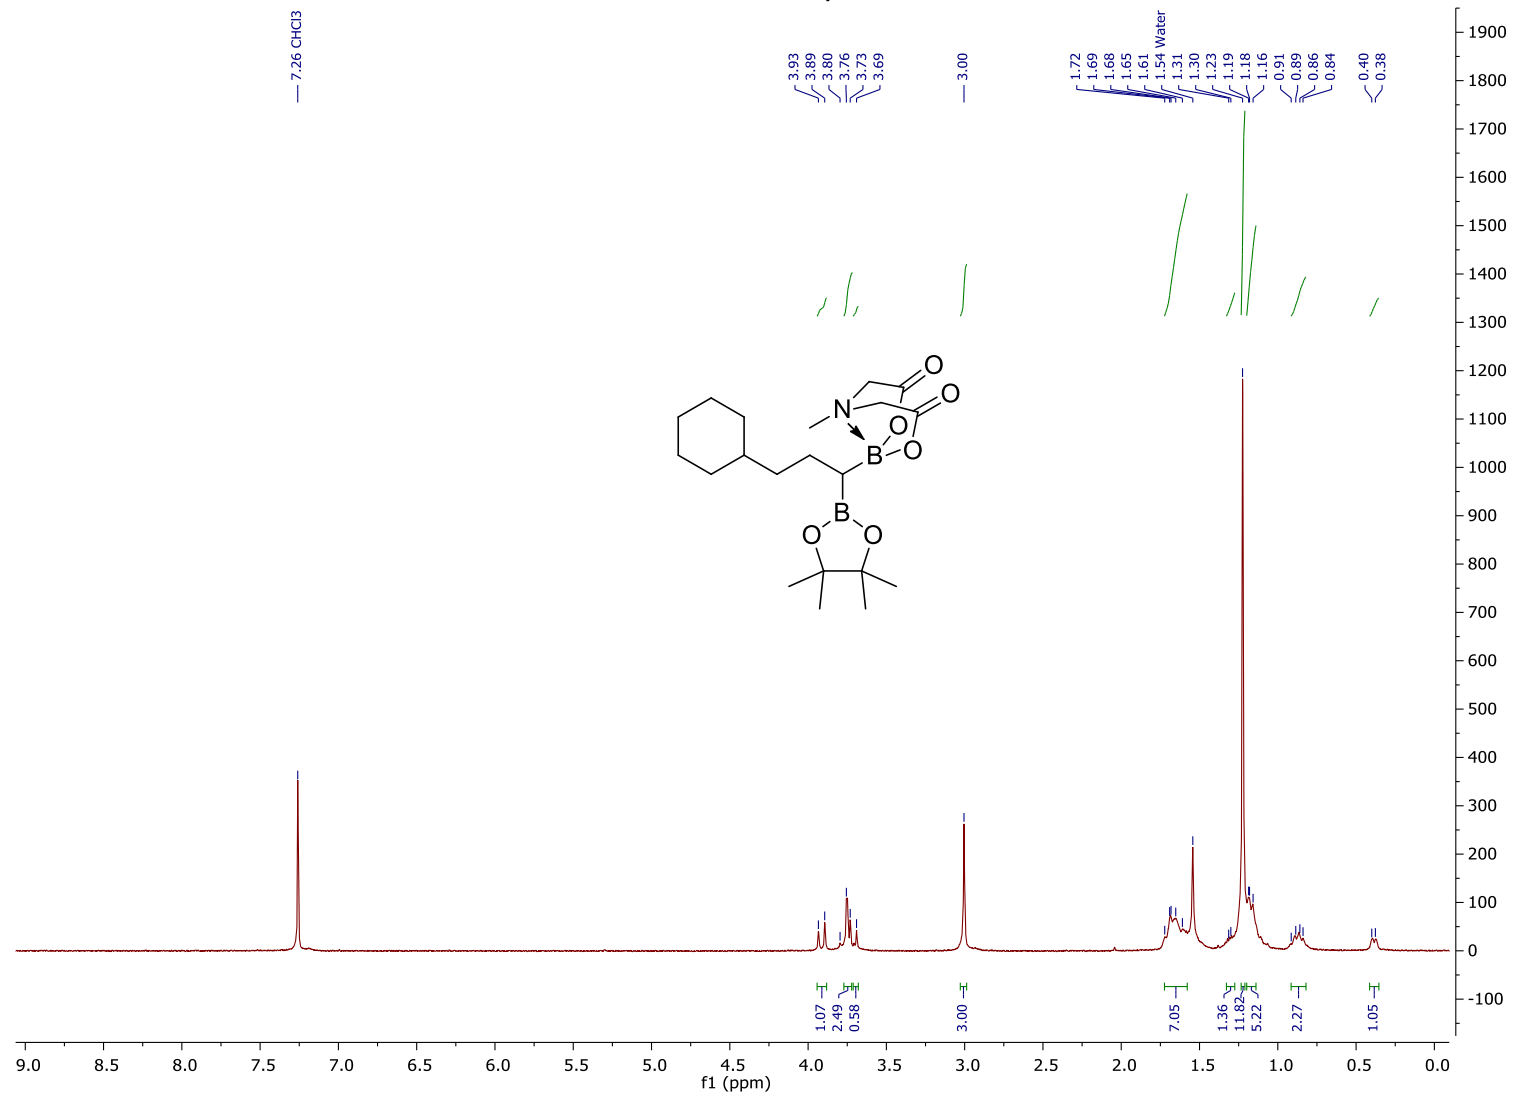

<sup>13</sup>C NMR, compound 3m

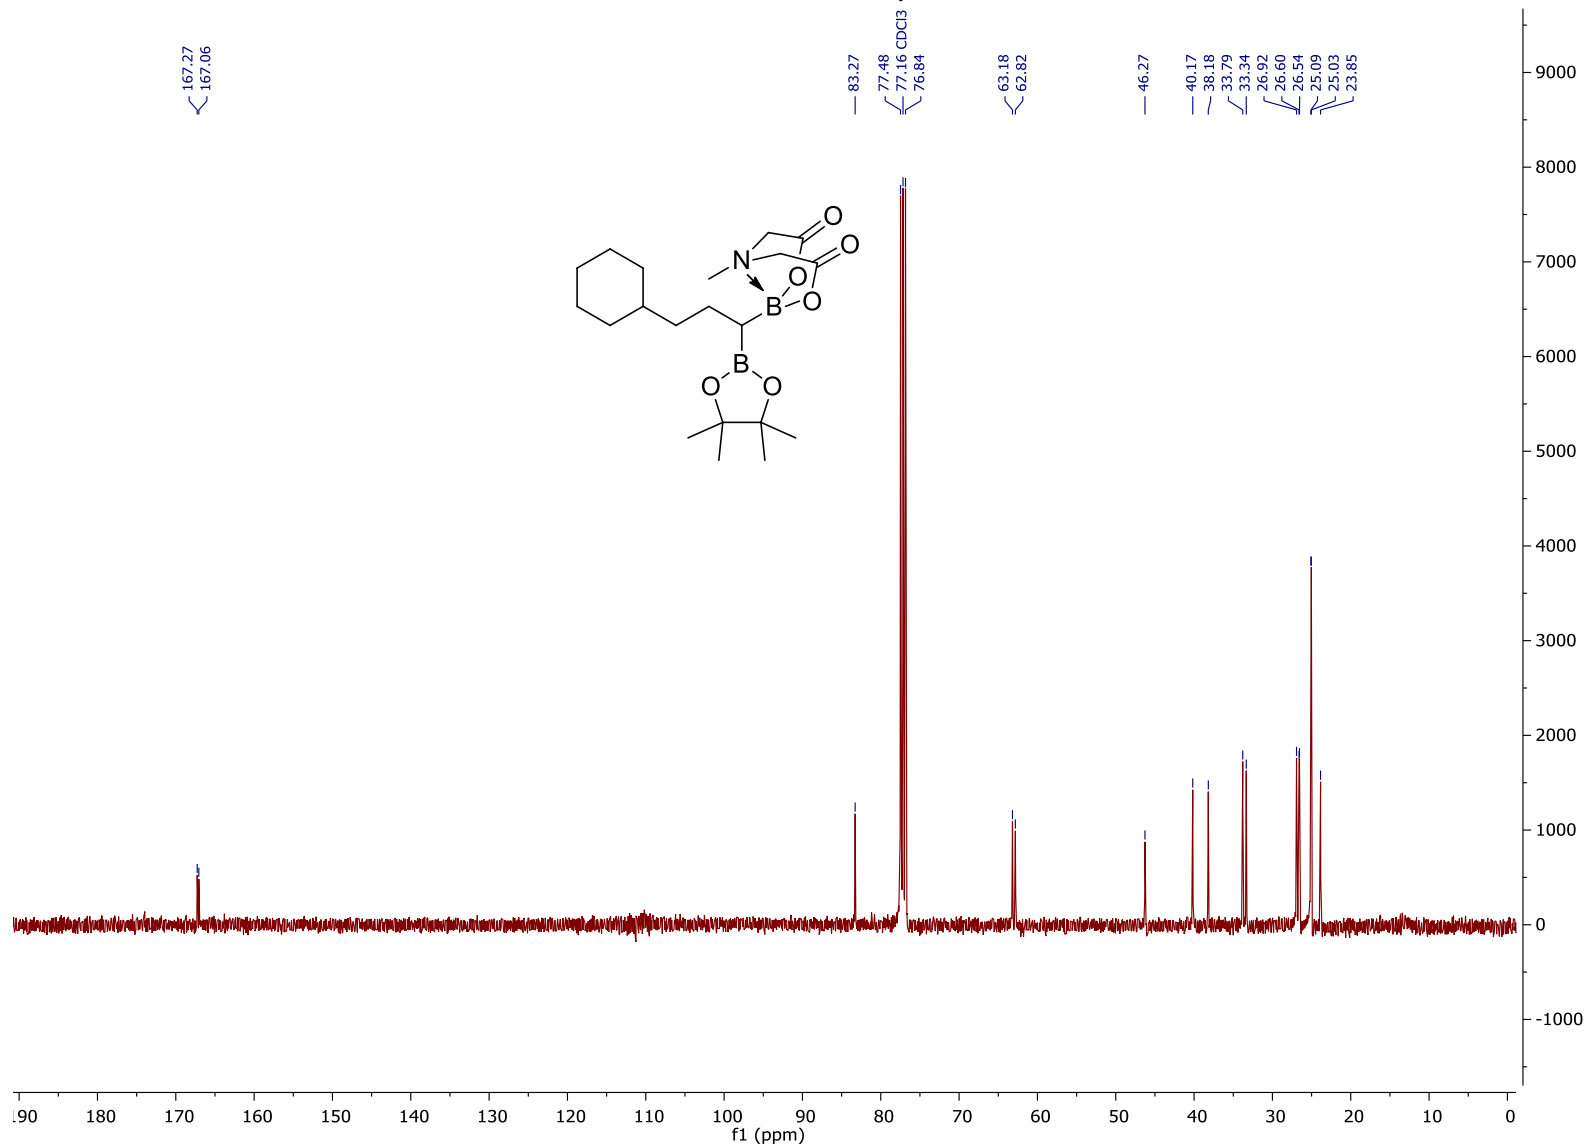



<sup>11</sup>B NMR, compound 3m

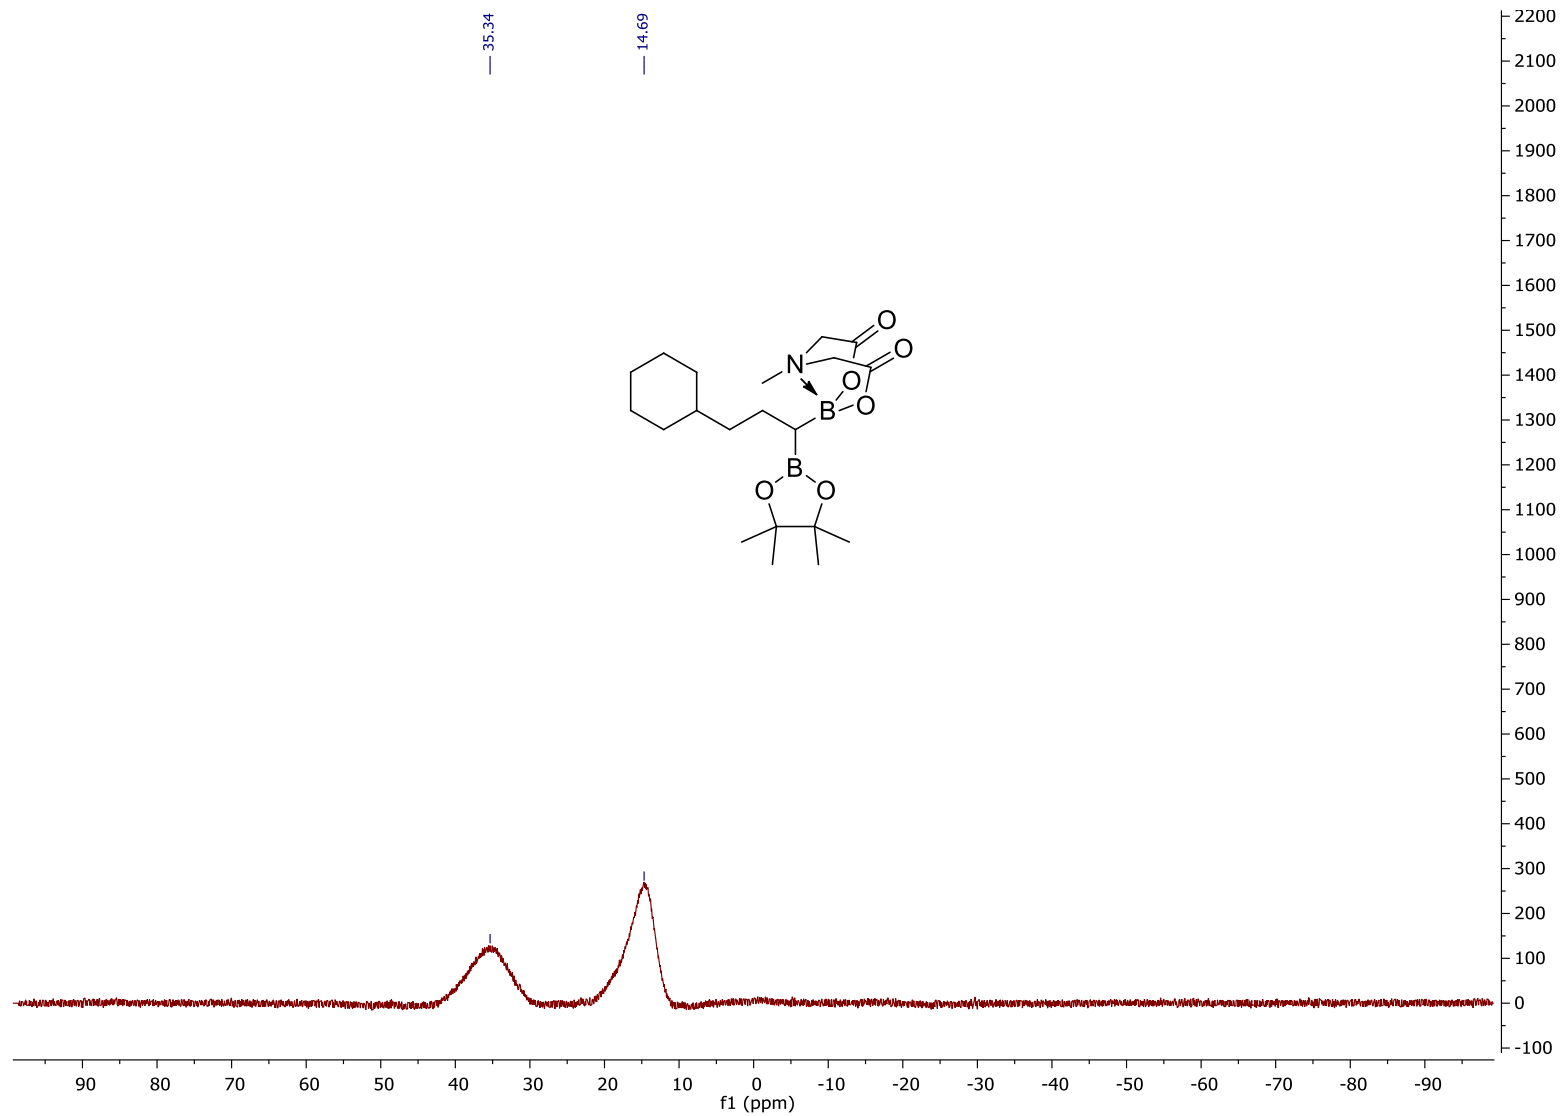

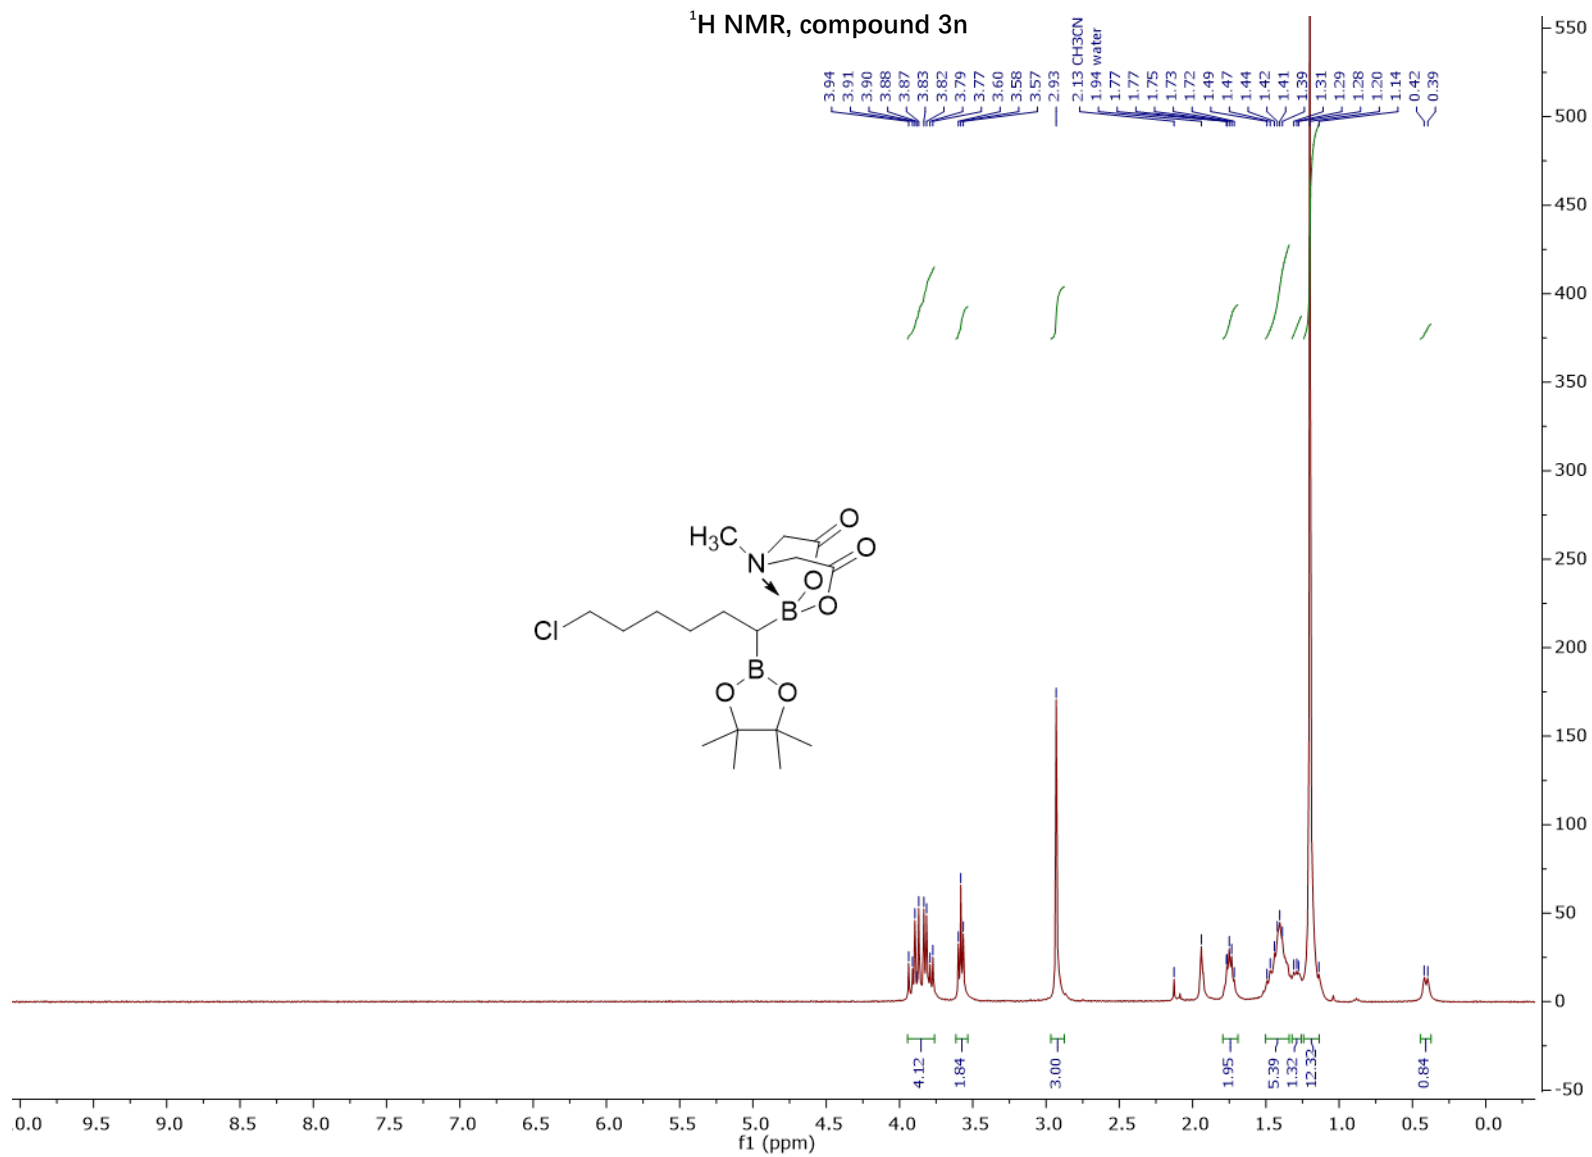

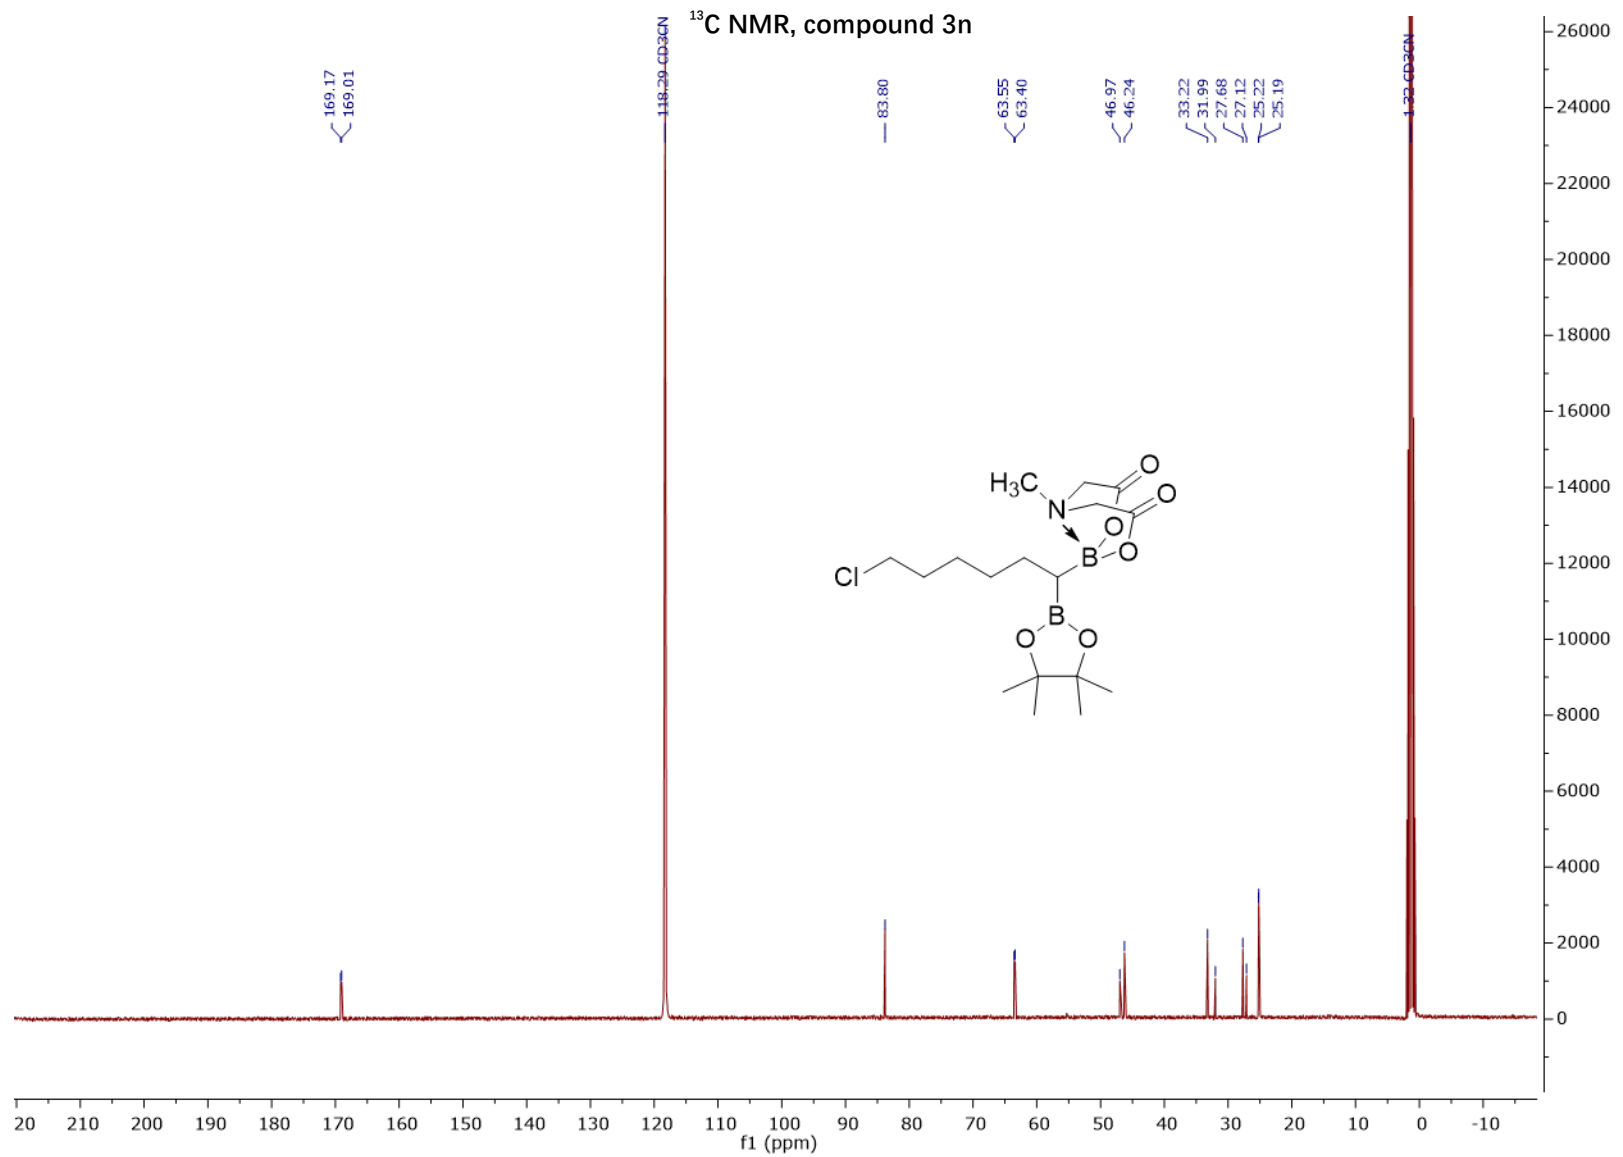

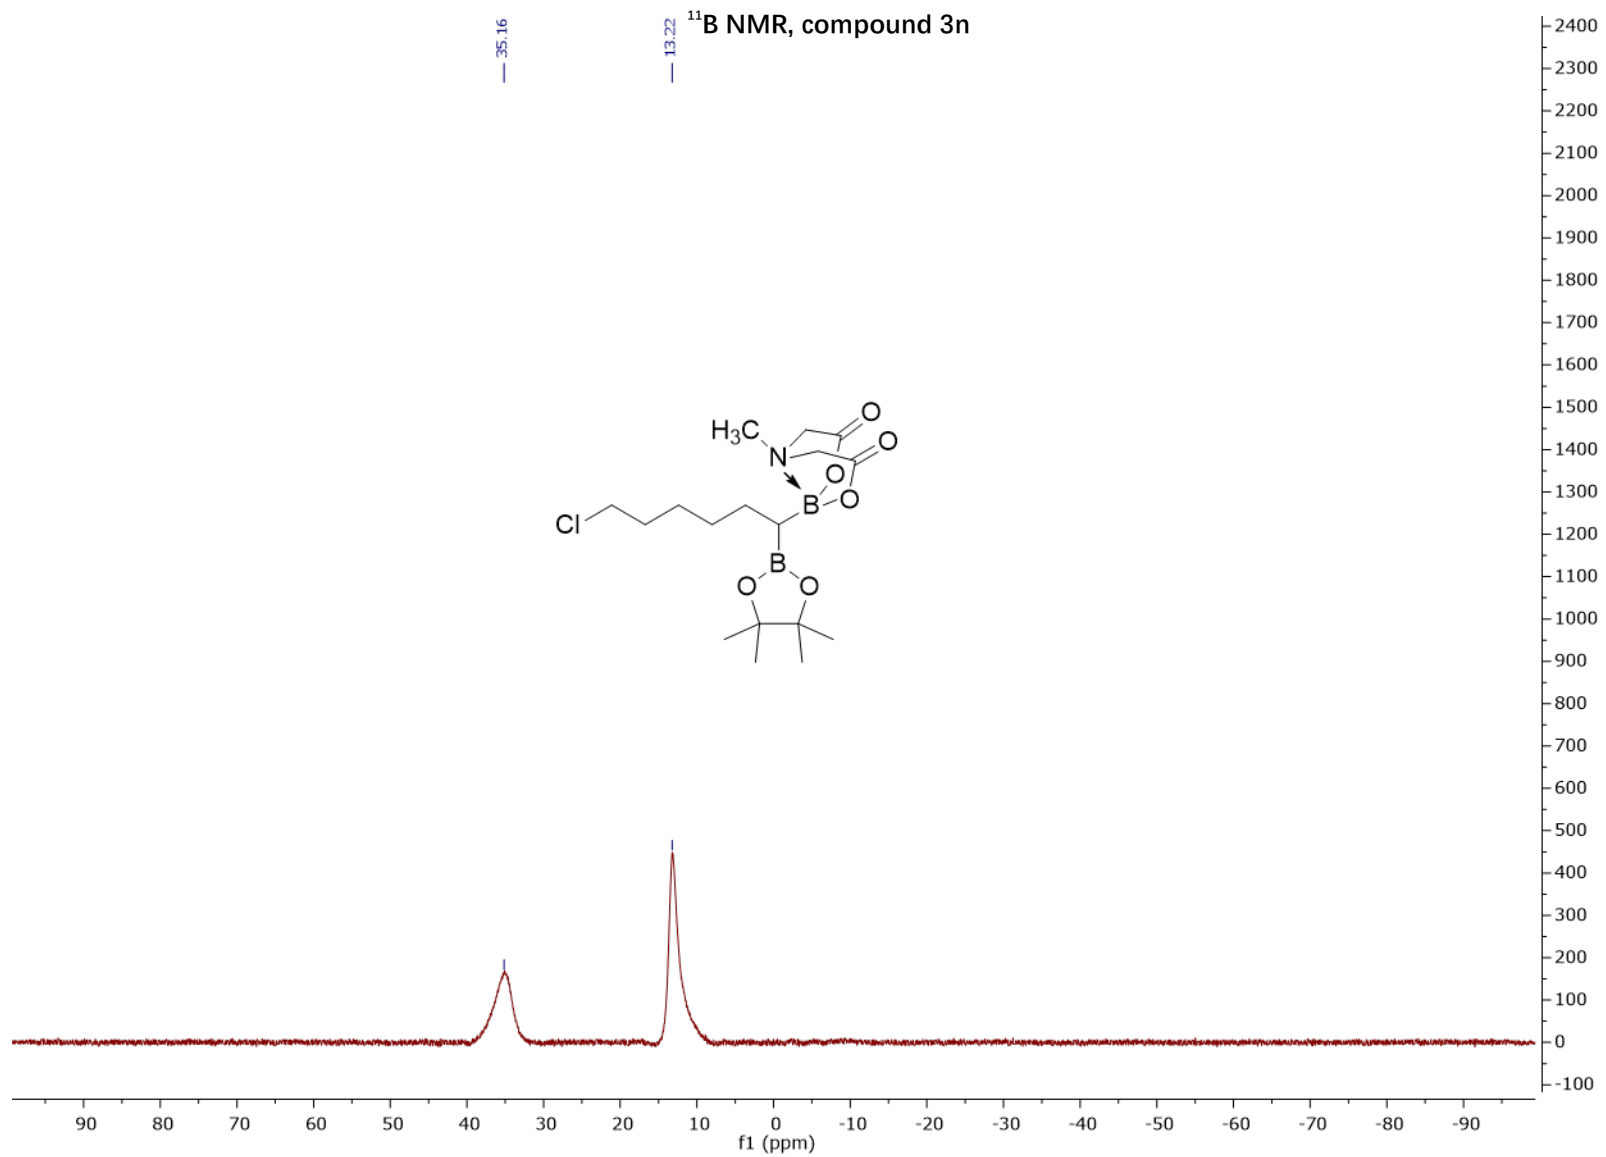

<sup>1</sup>H NMR, compound 3o

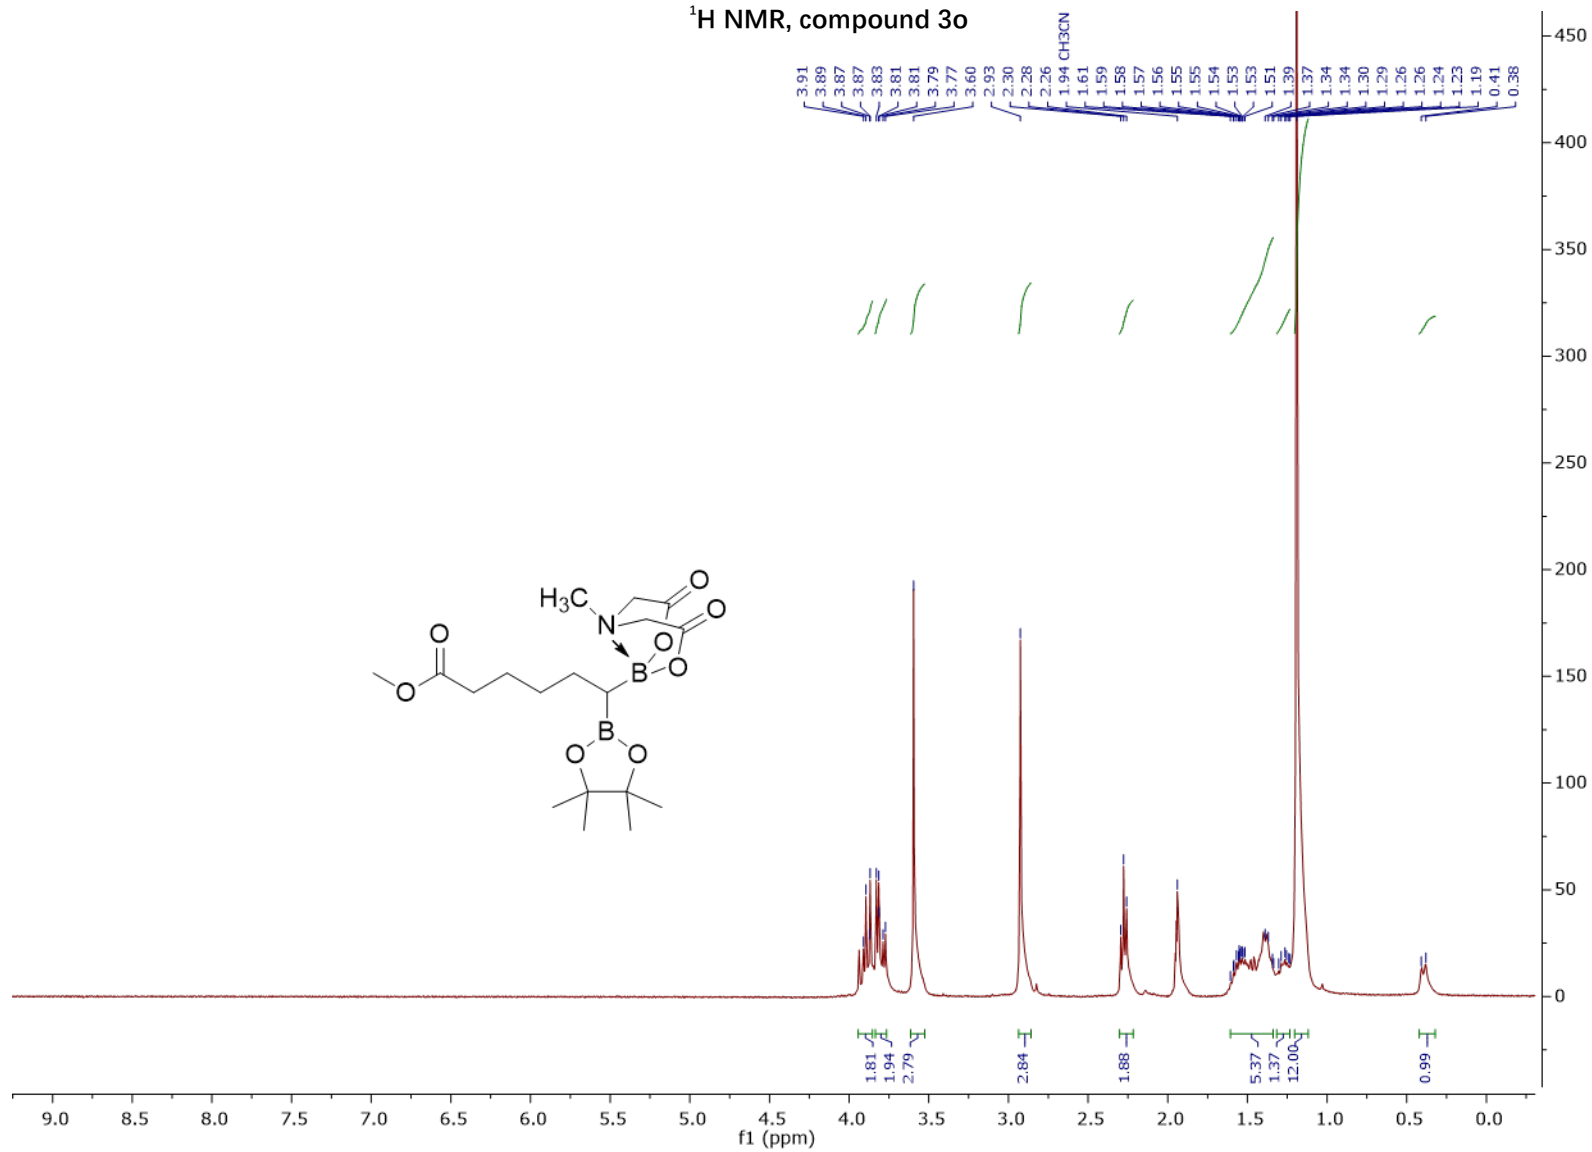

<sup>13</sup>C NMR, compound 3o

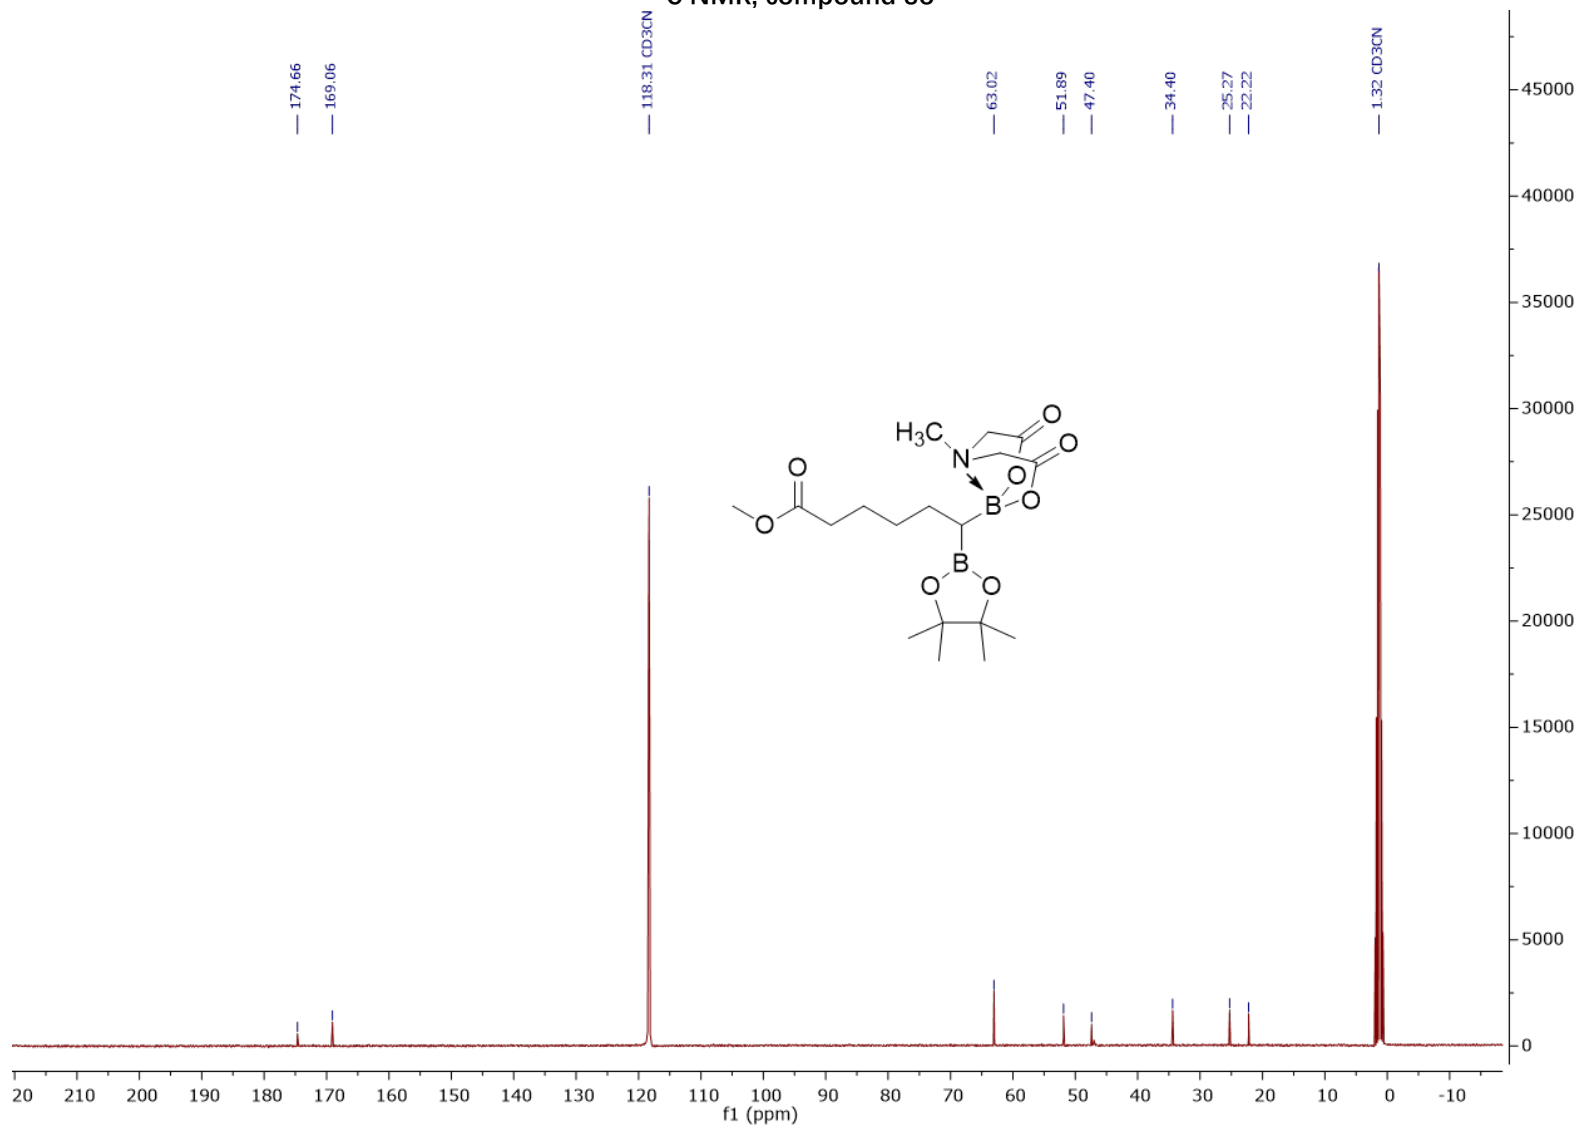

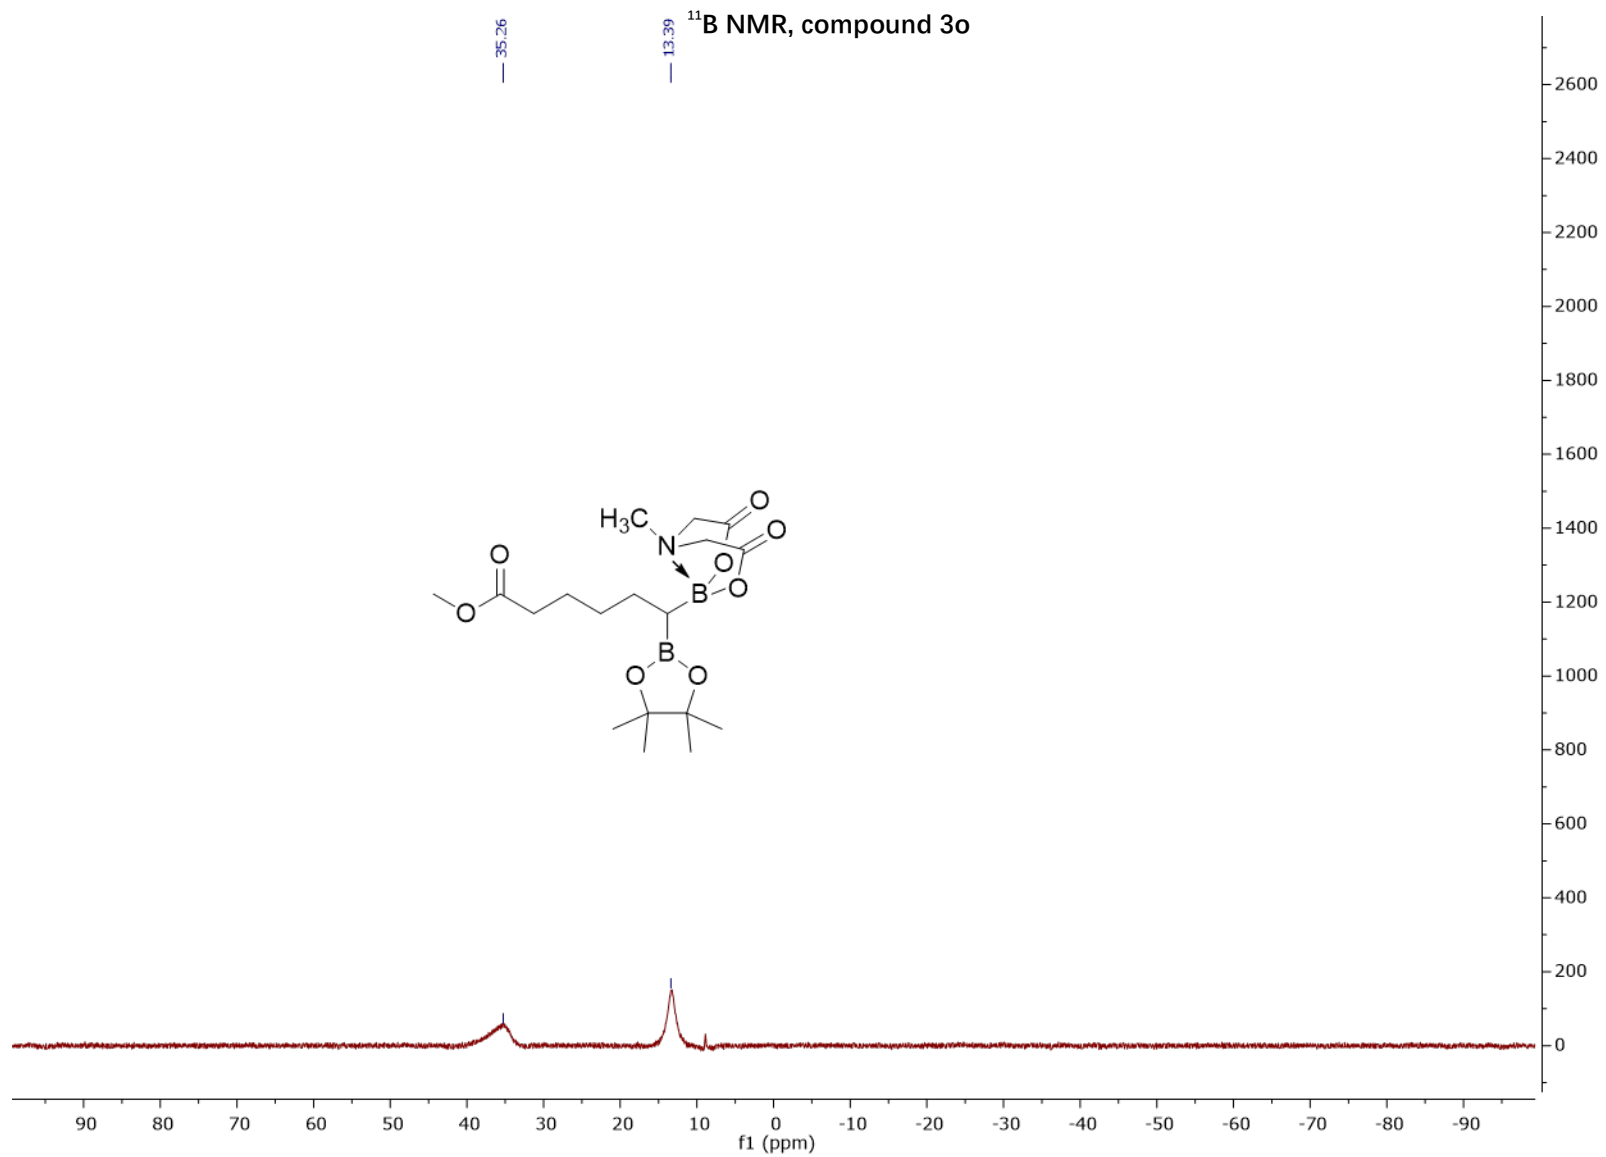

<sup>1</sup>H NMR, compound 3p

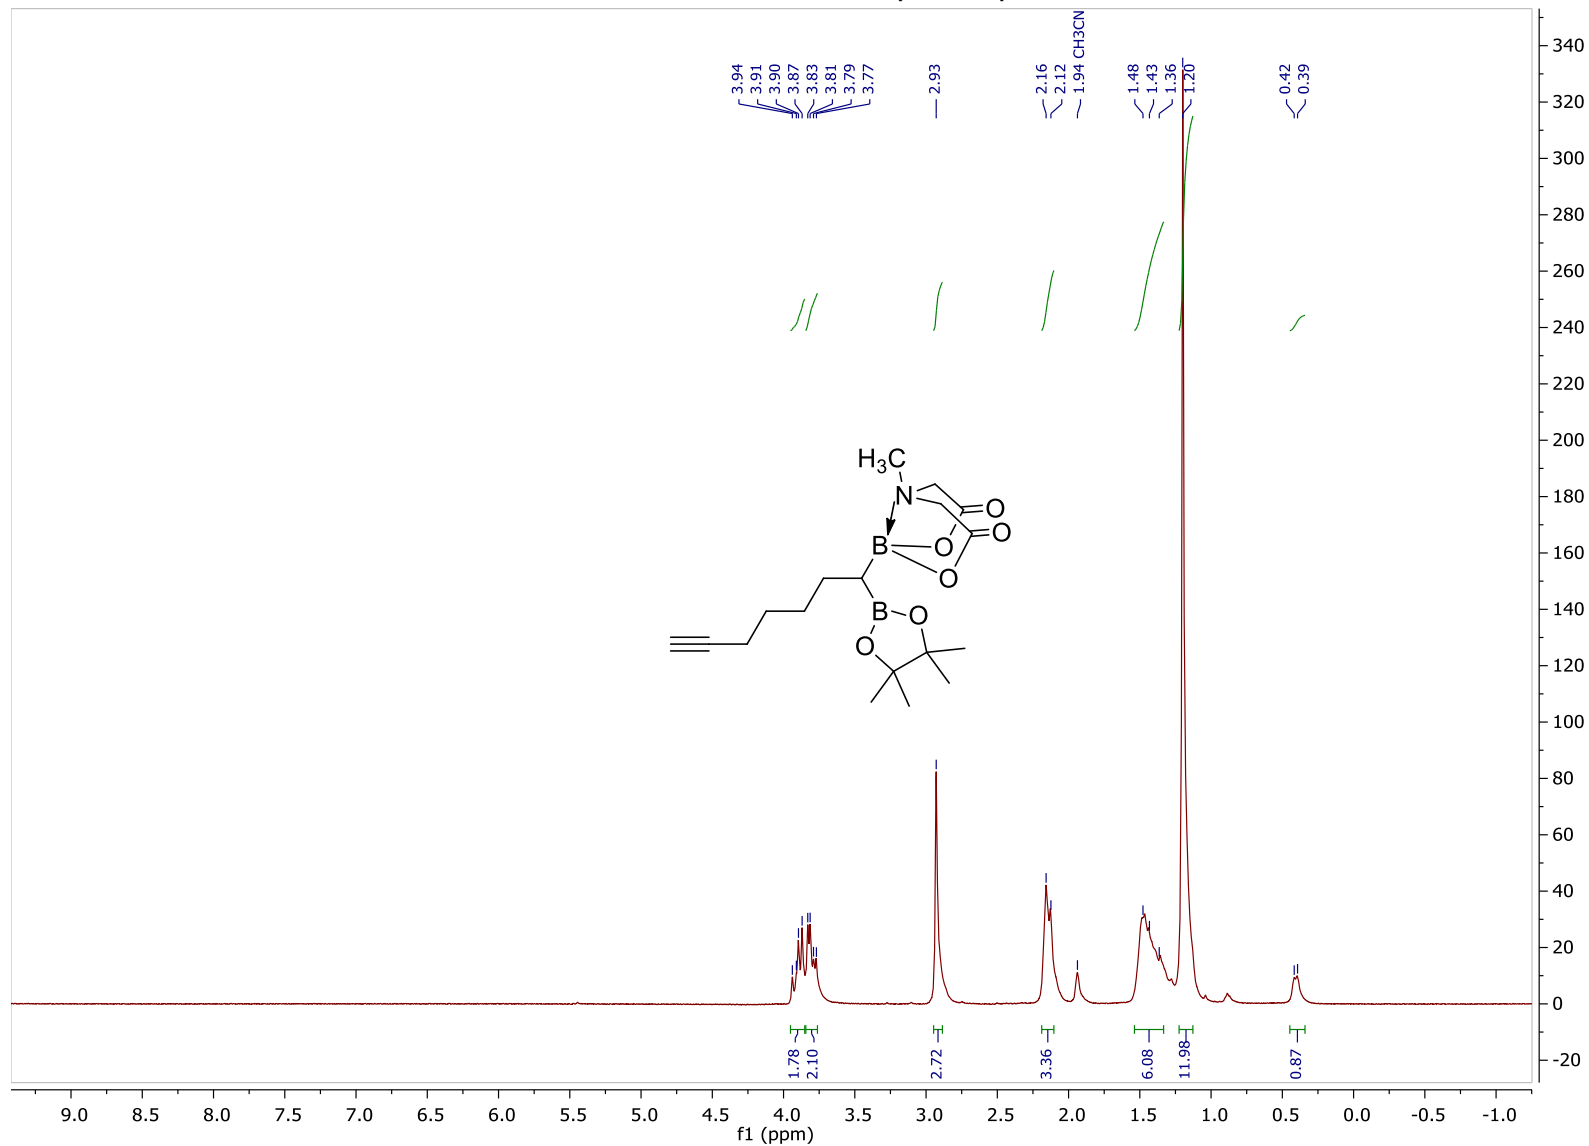



<sup>13</sup>C NMR, compound 3p

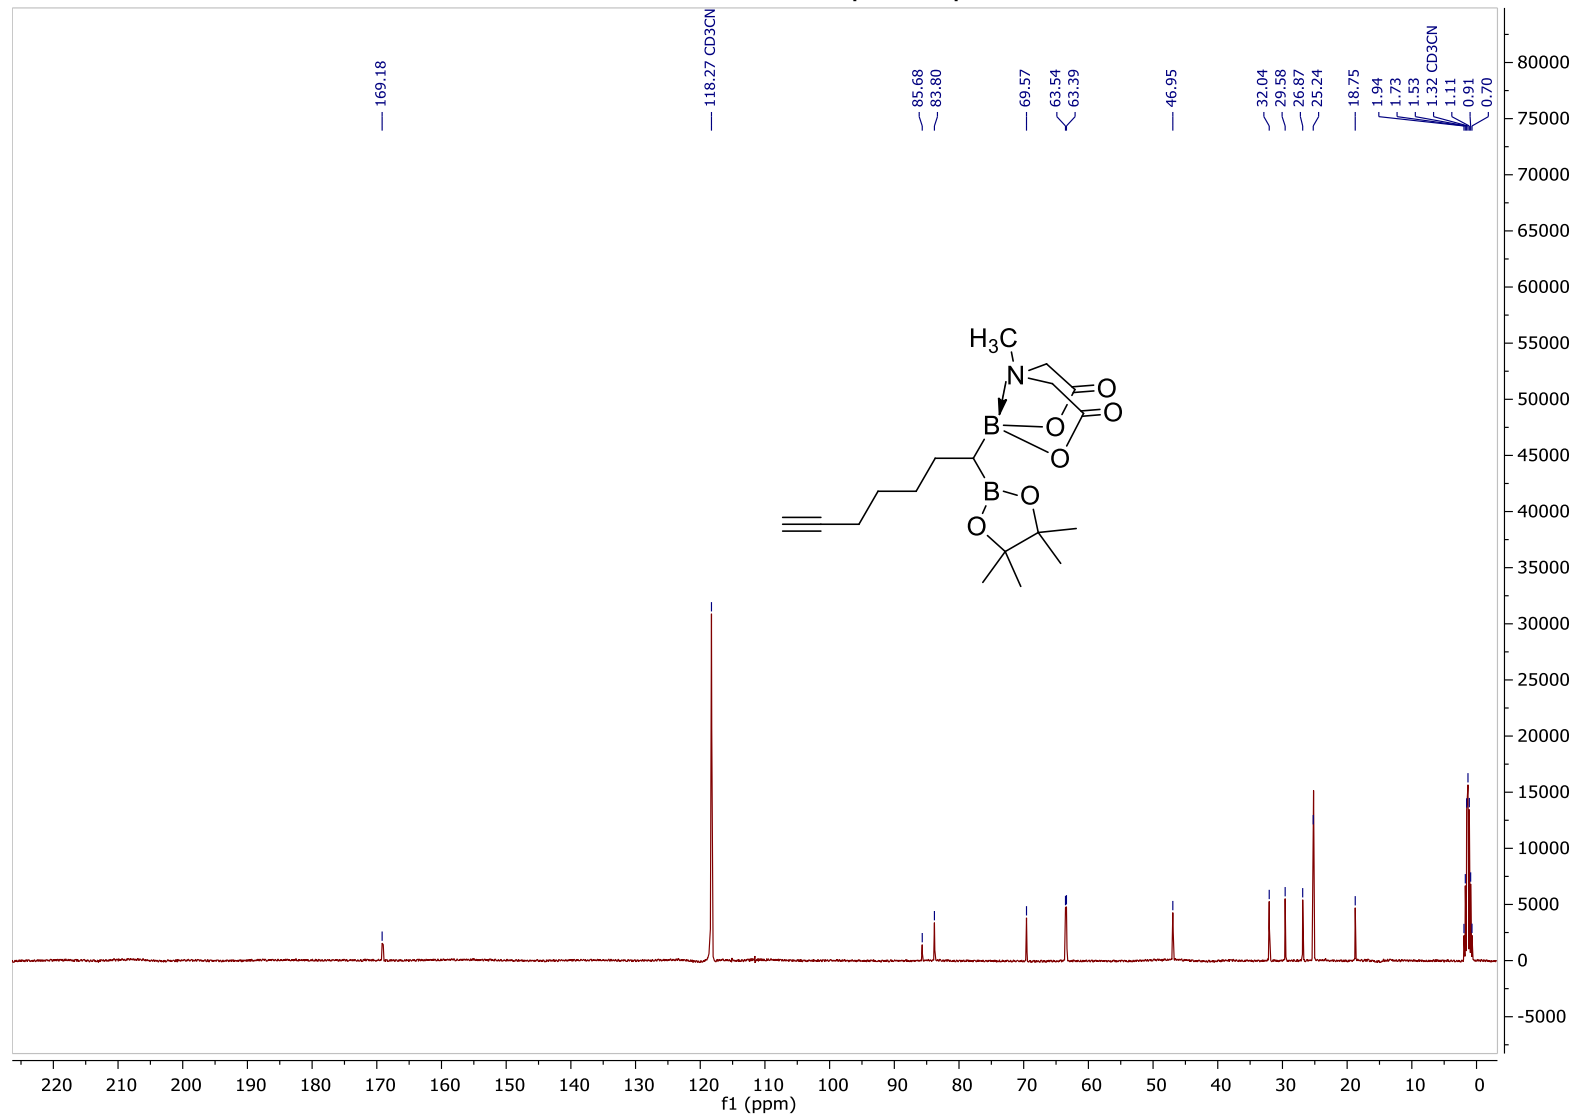

<sup>11</sup>B NMR, compound 3p

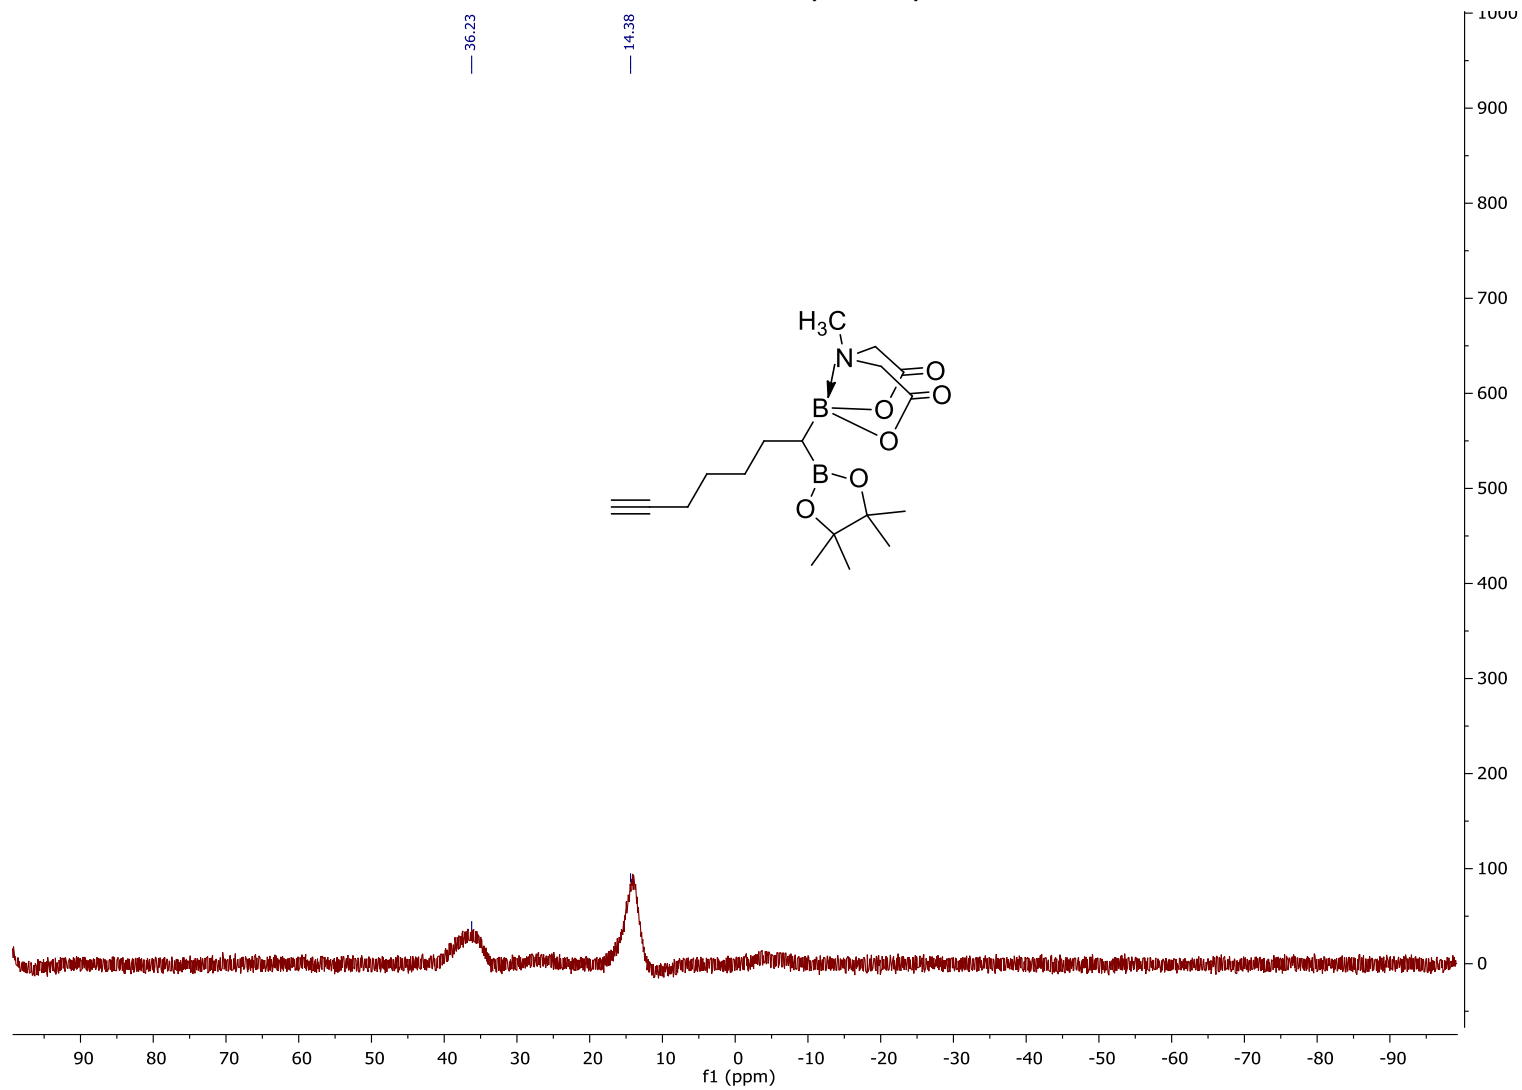

<sup>1</sup>H NMR, compound 3q

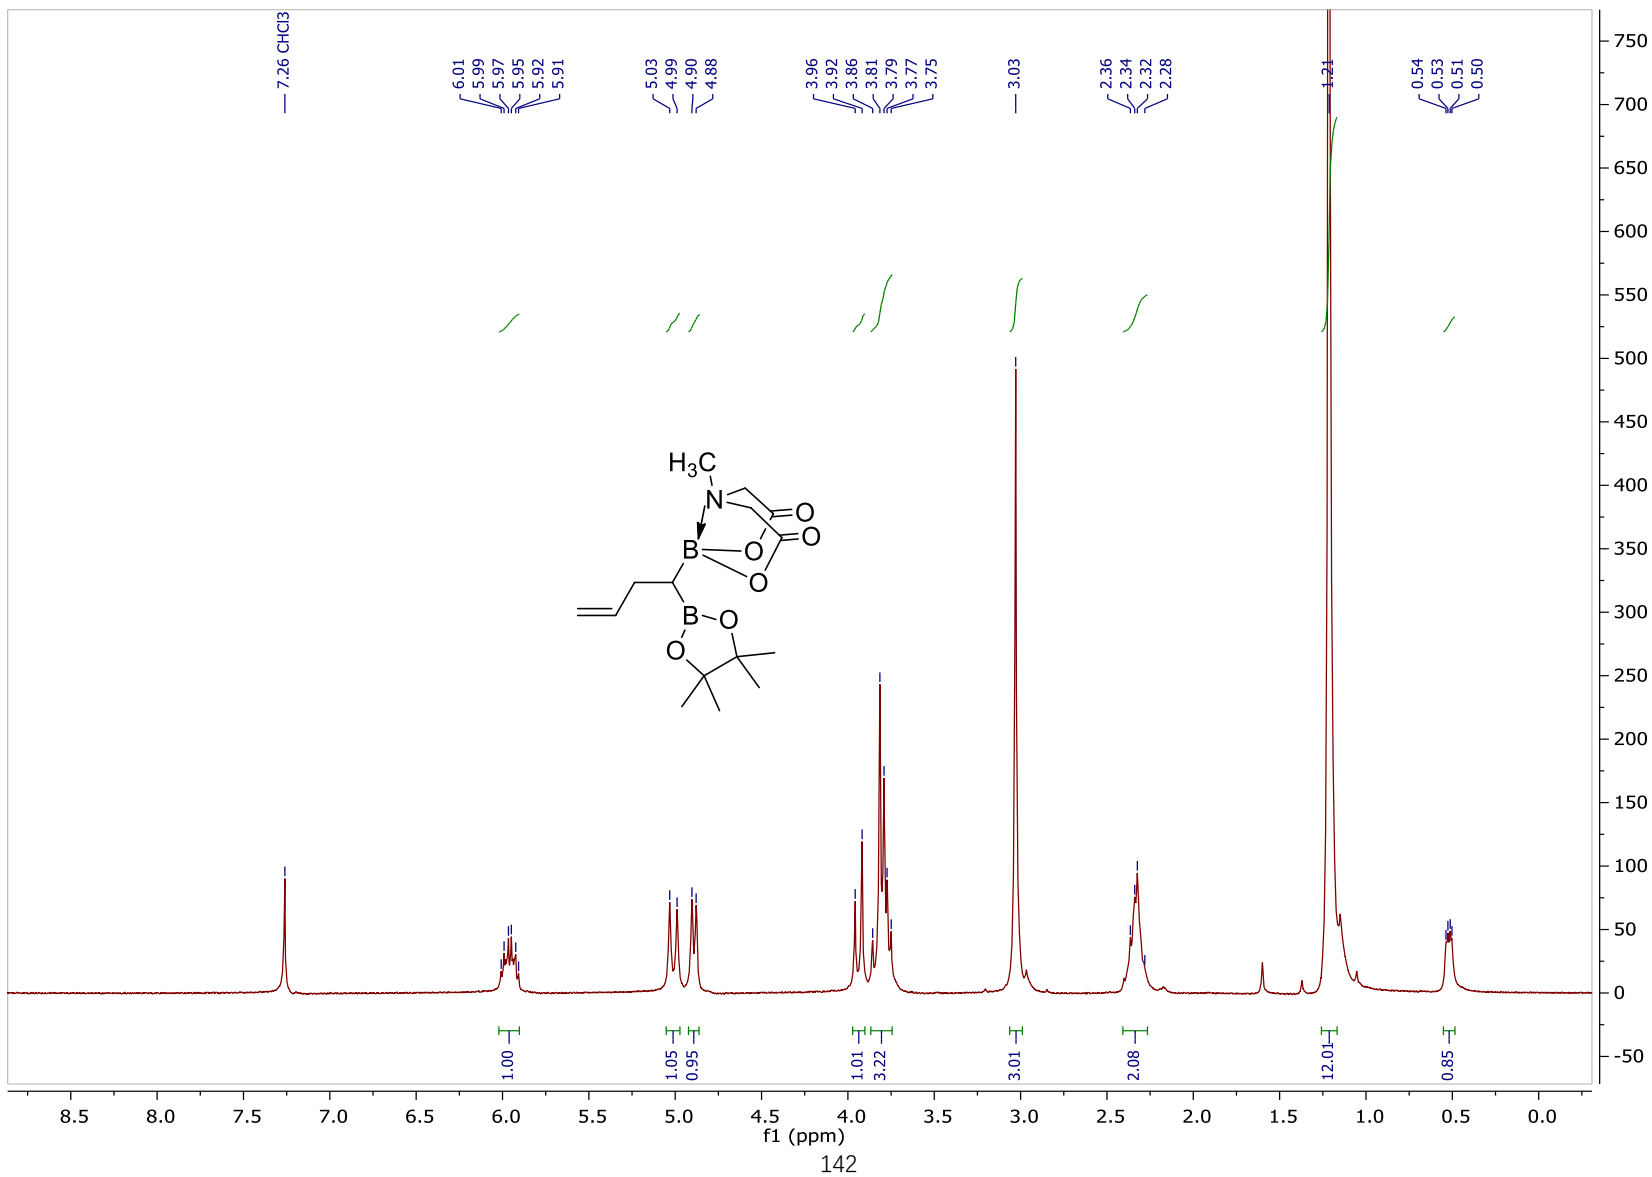



$^{11}\text{B}$  NMR, compound 3q

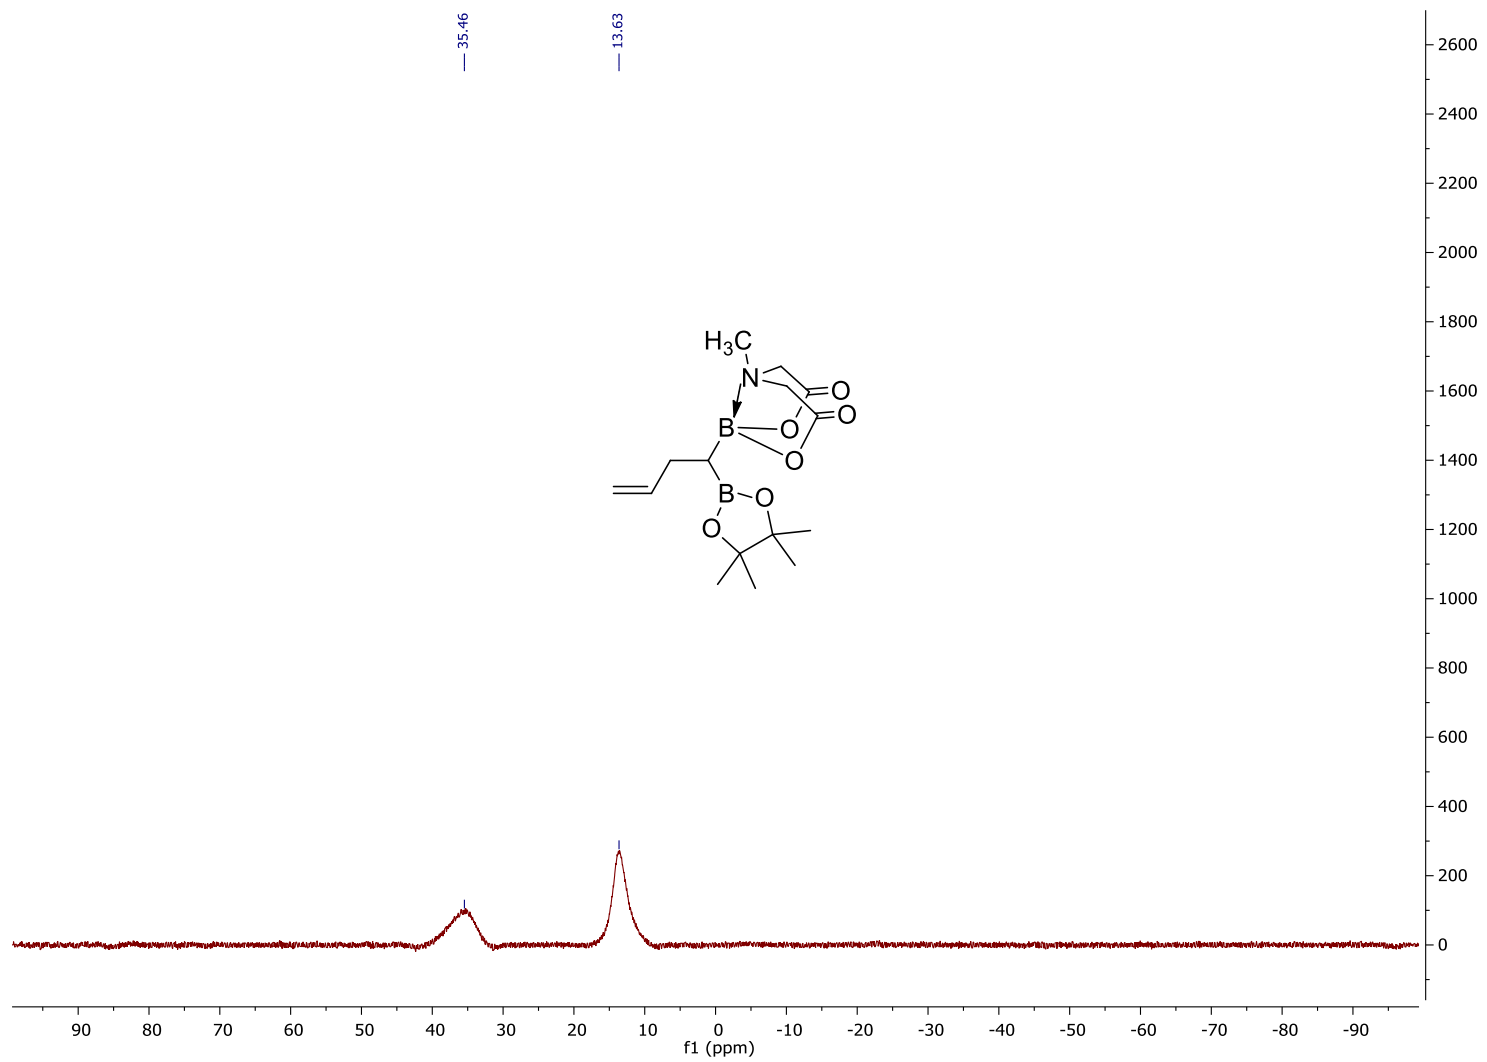

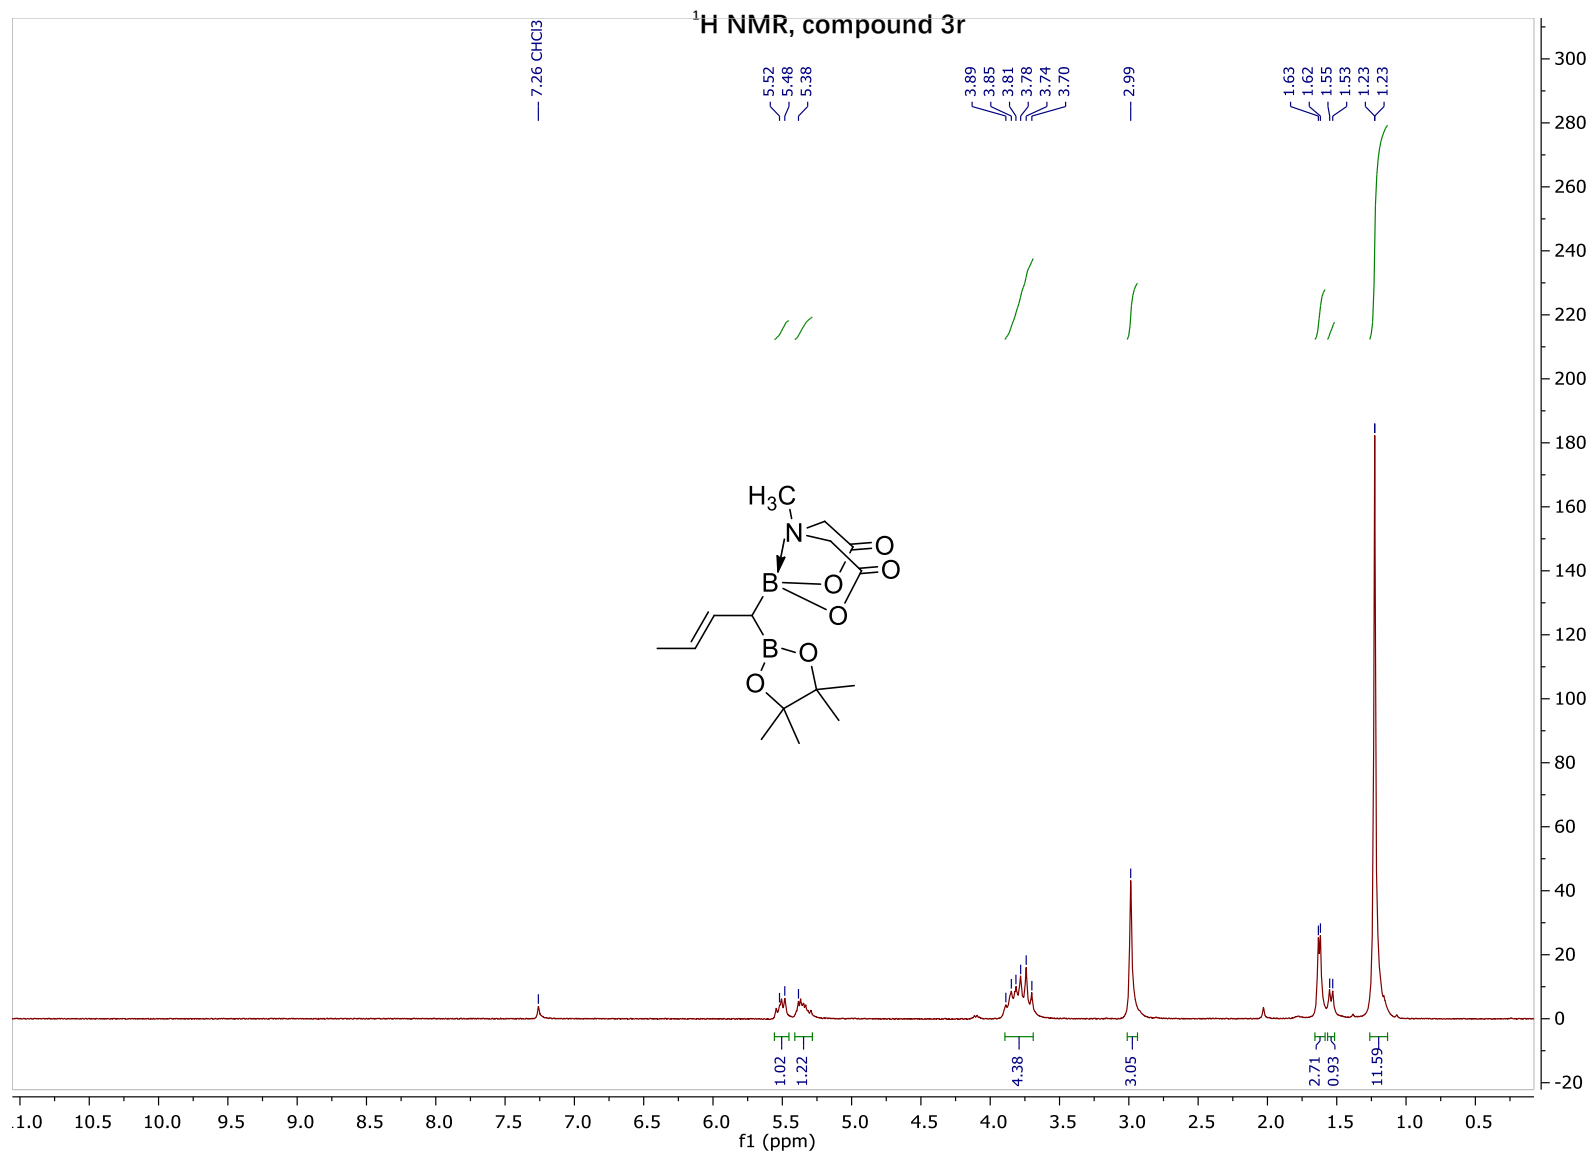

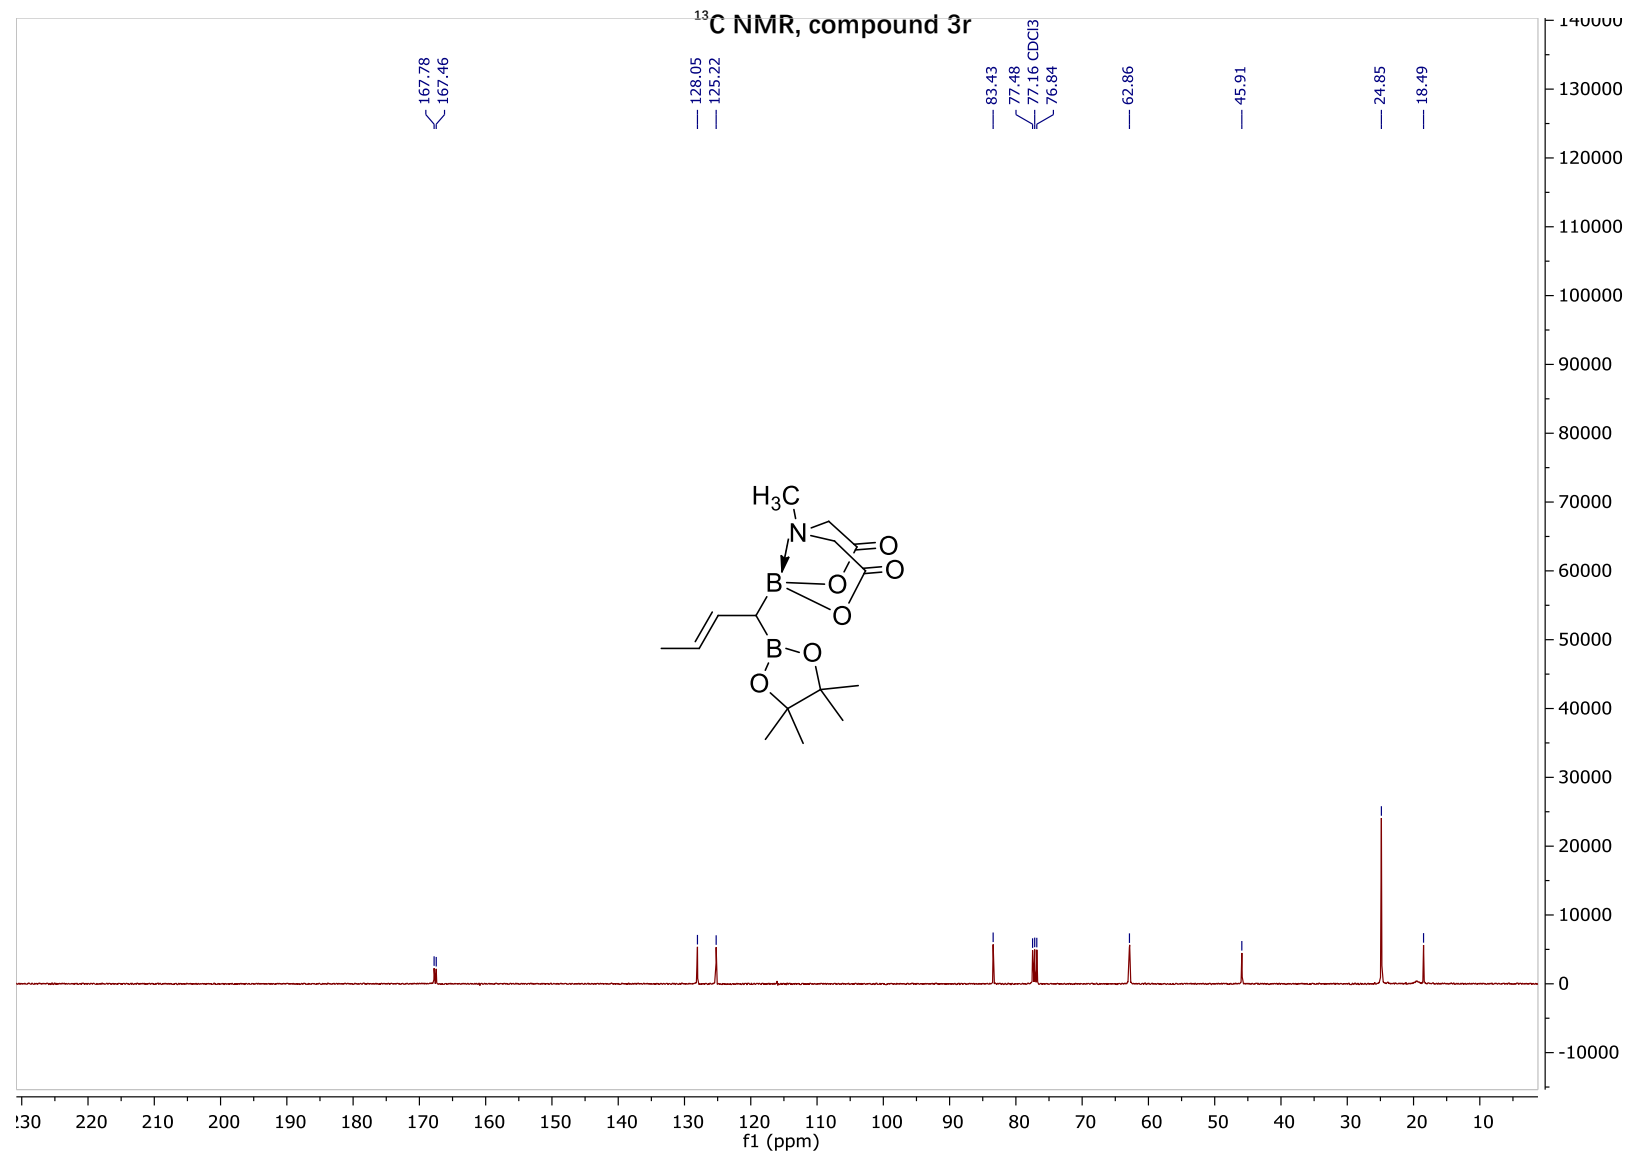

<sup>11</sup>B NMR, compound 3r

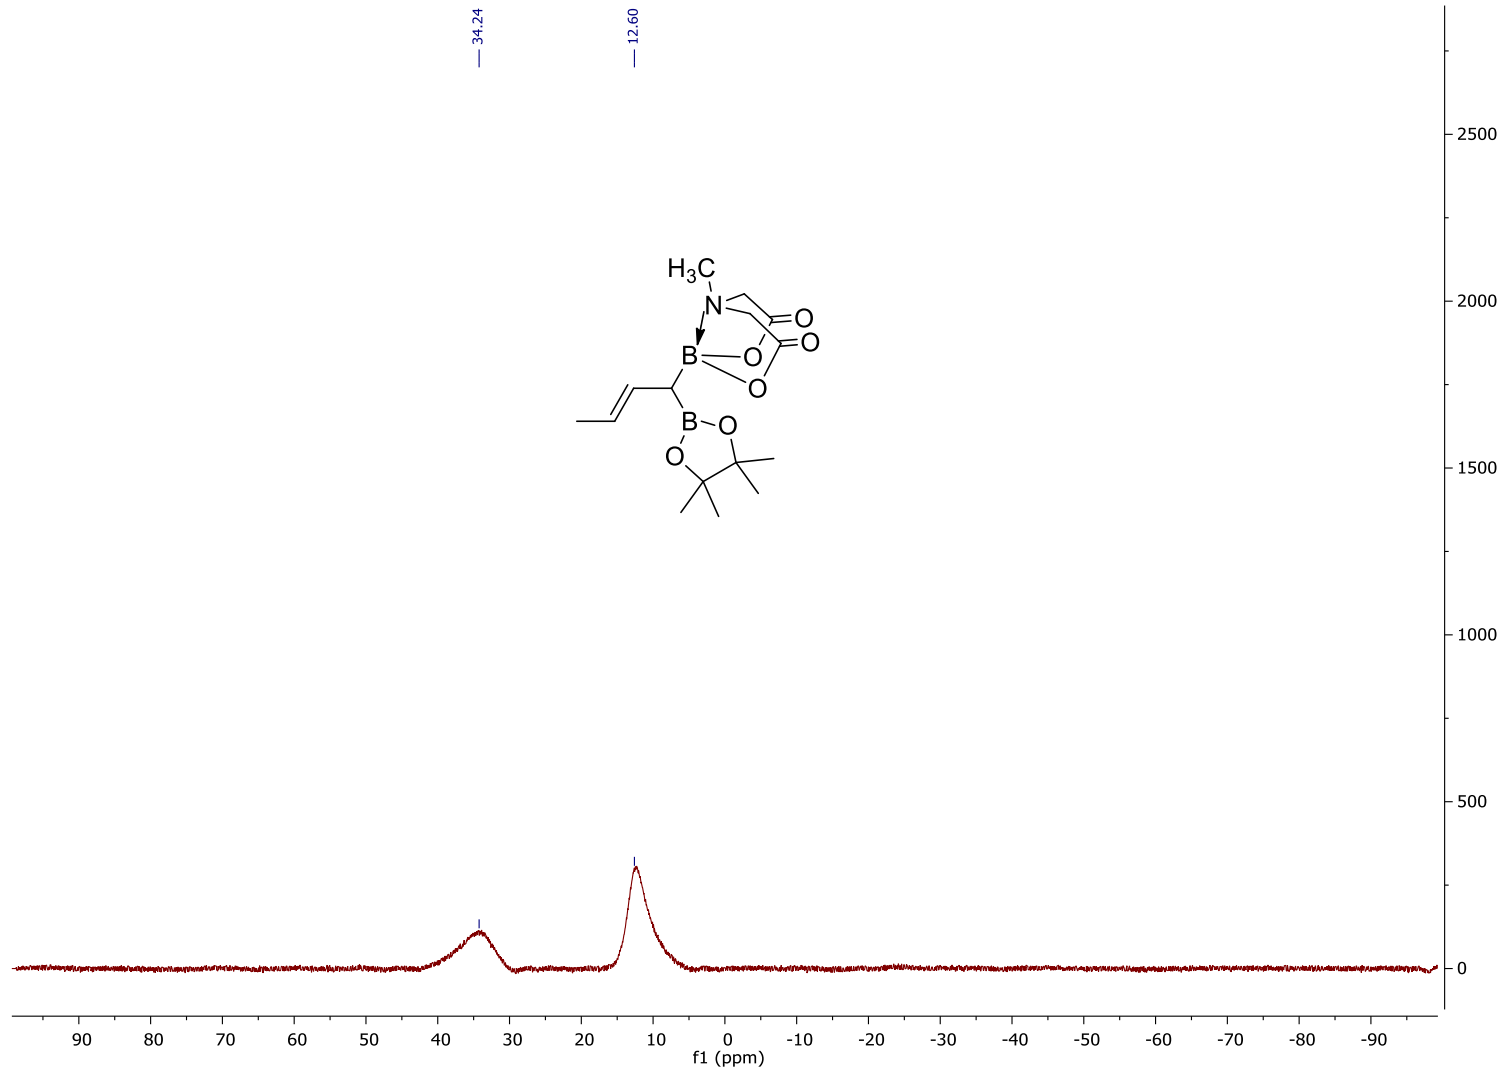



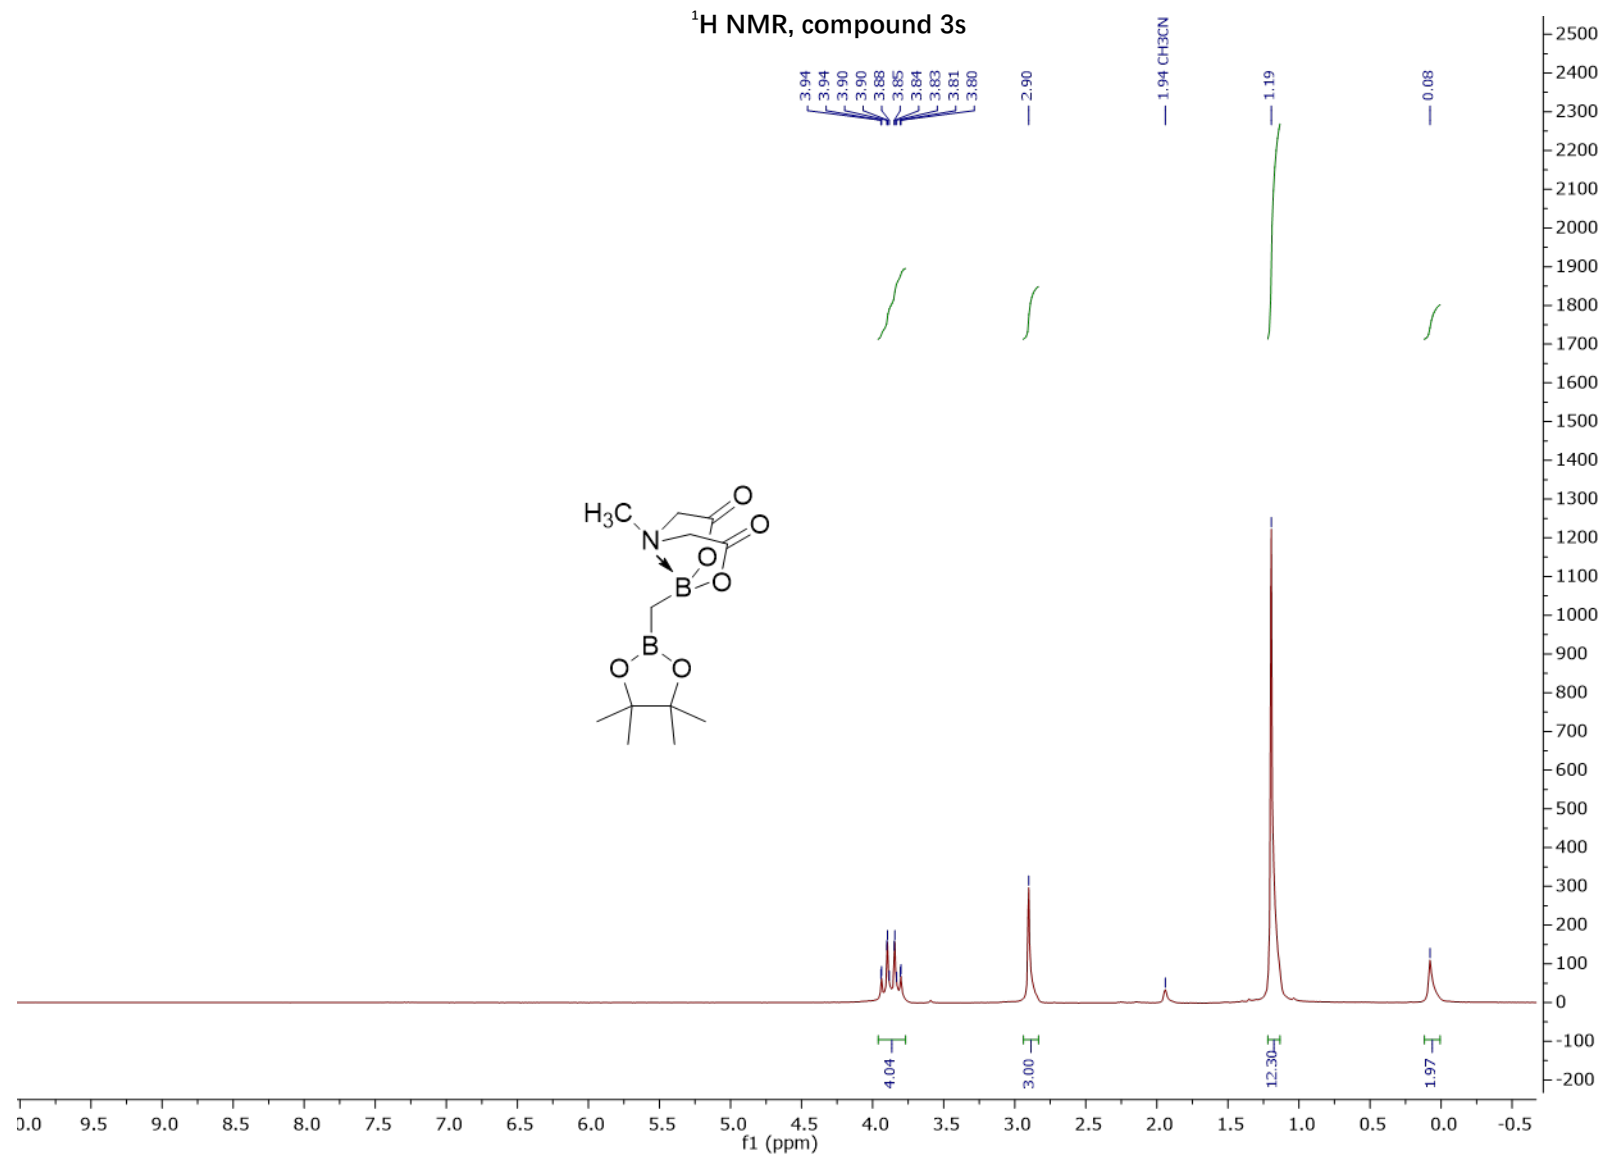

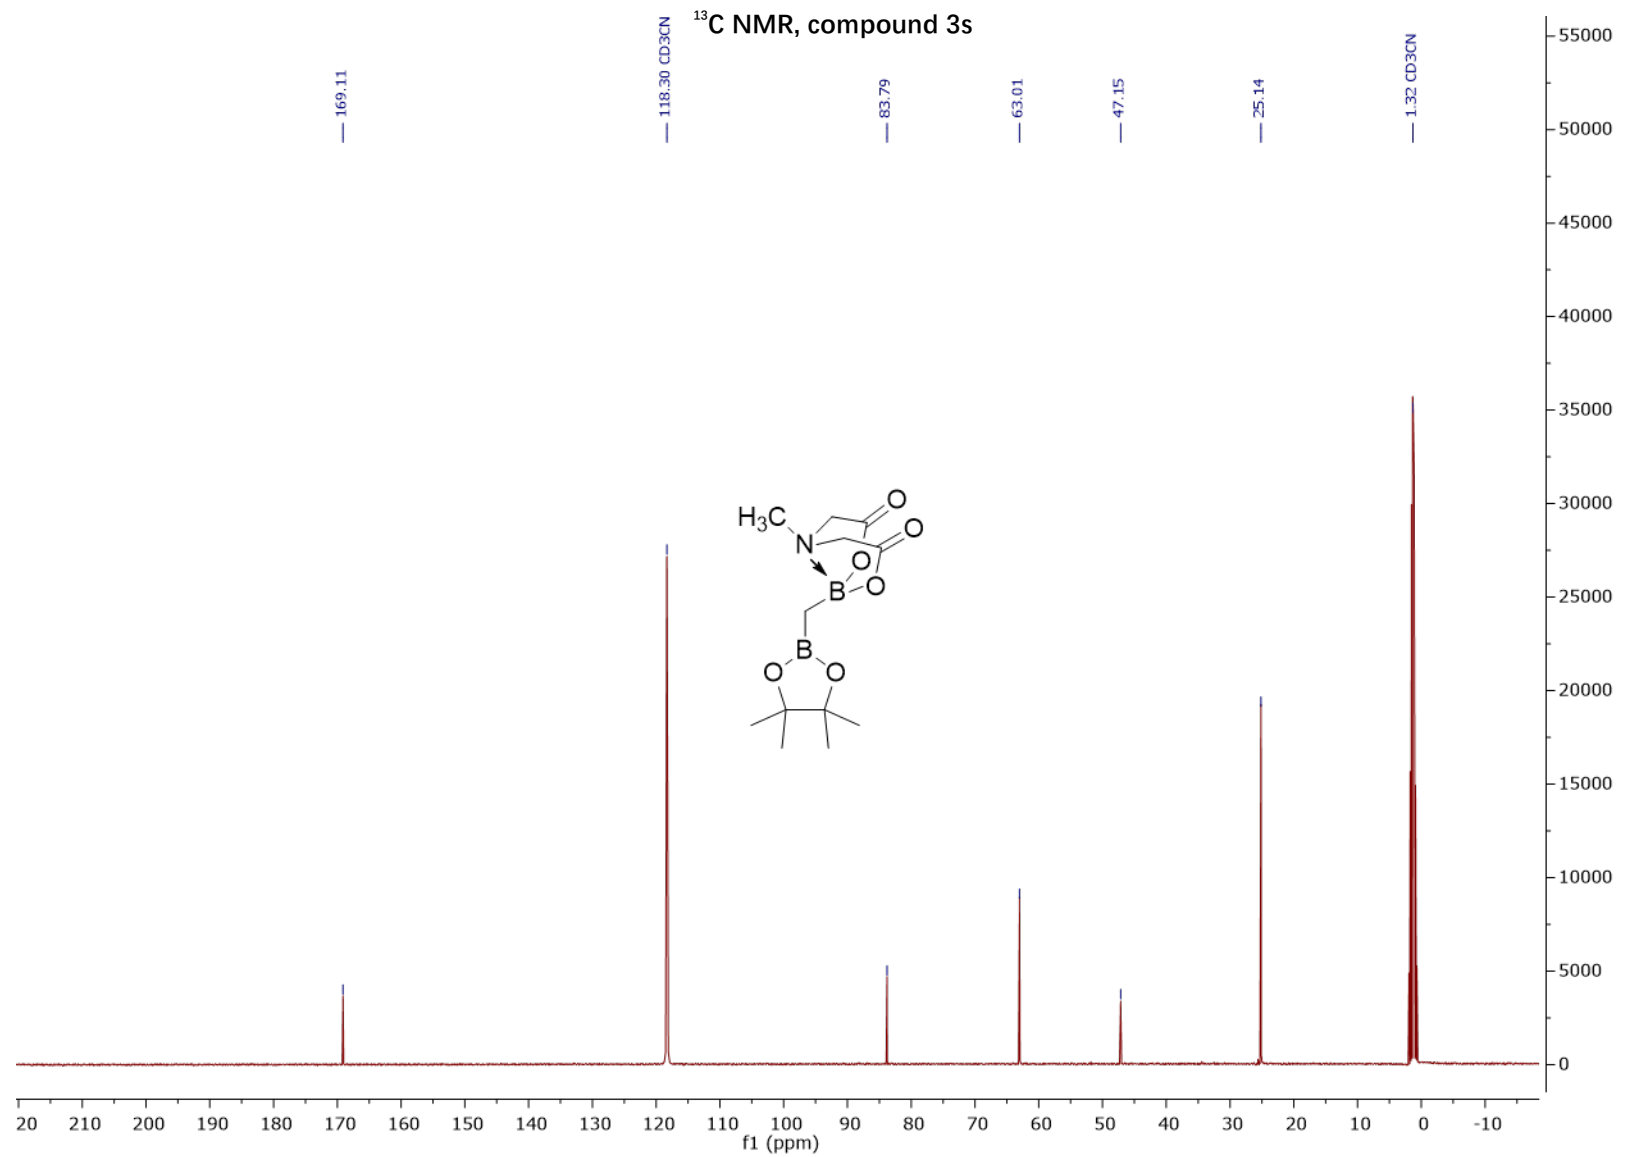

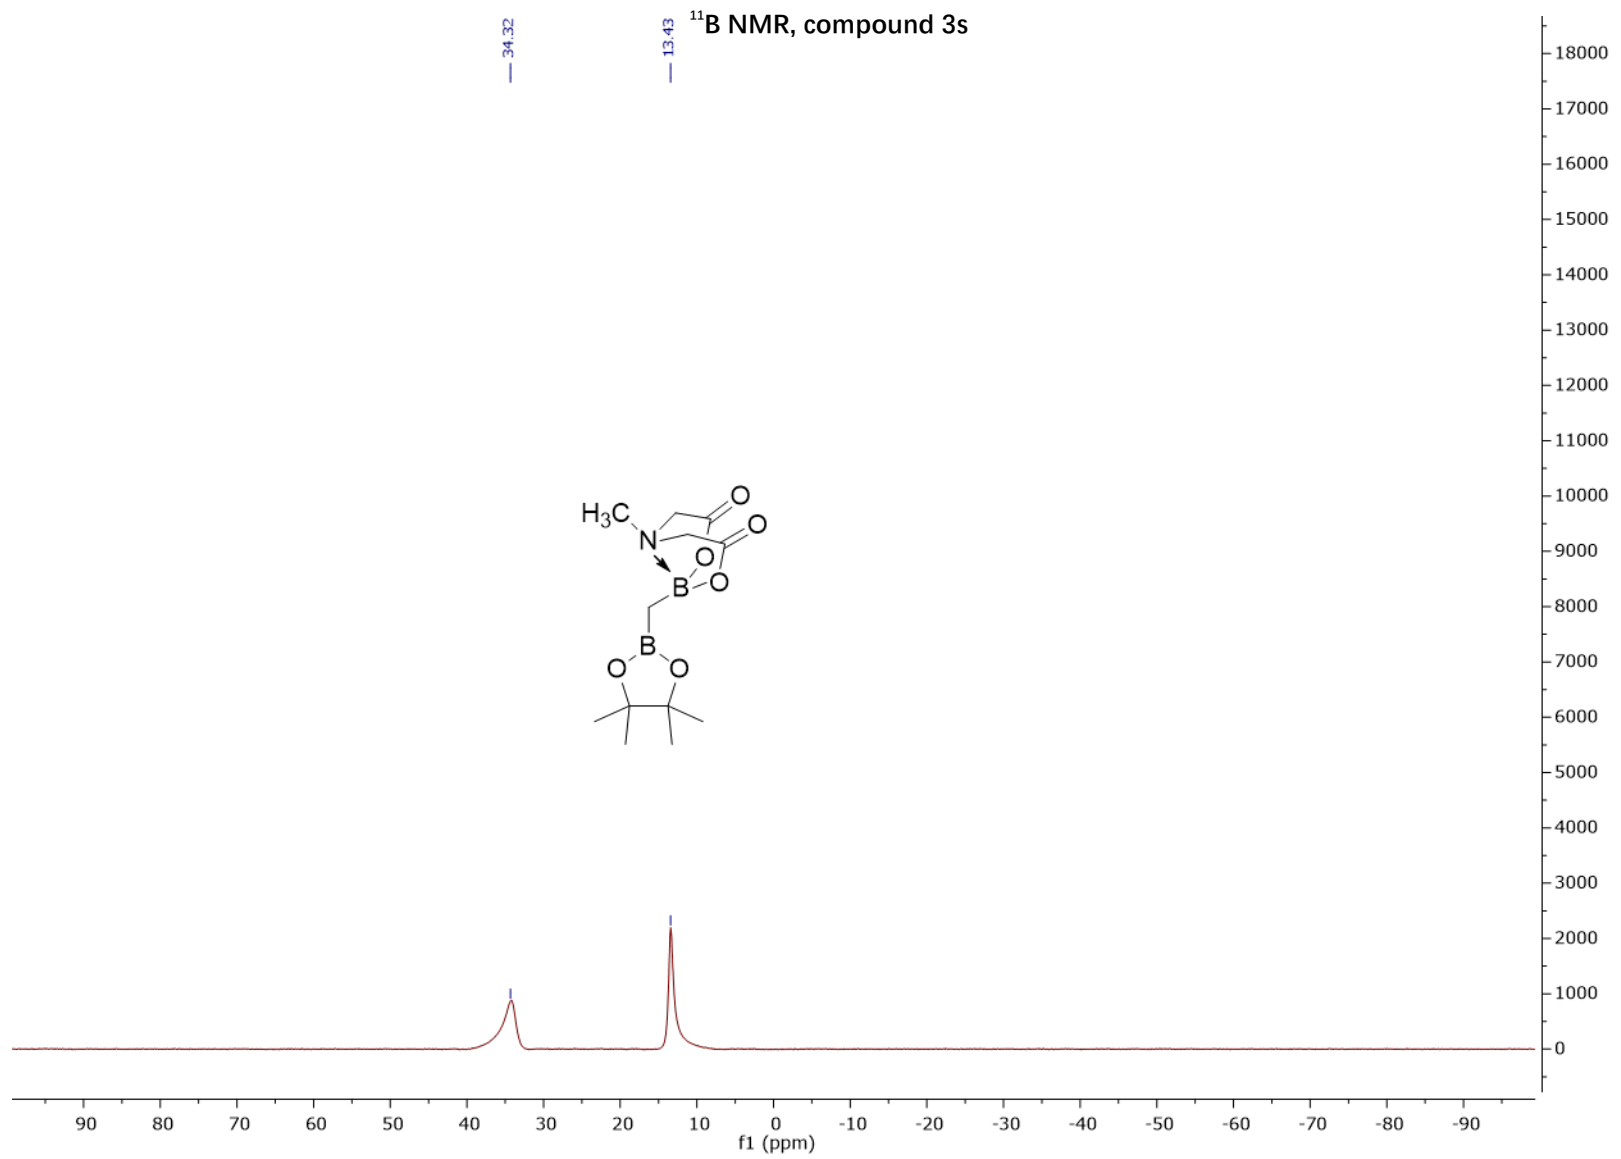

<sup>1</sup>H NMR, compound 4a

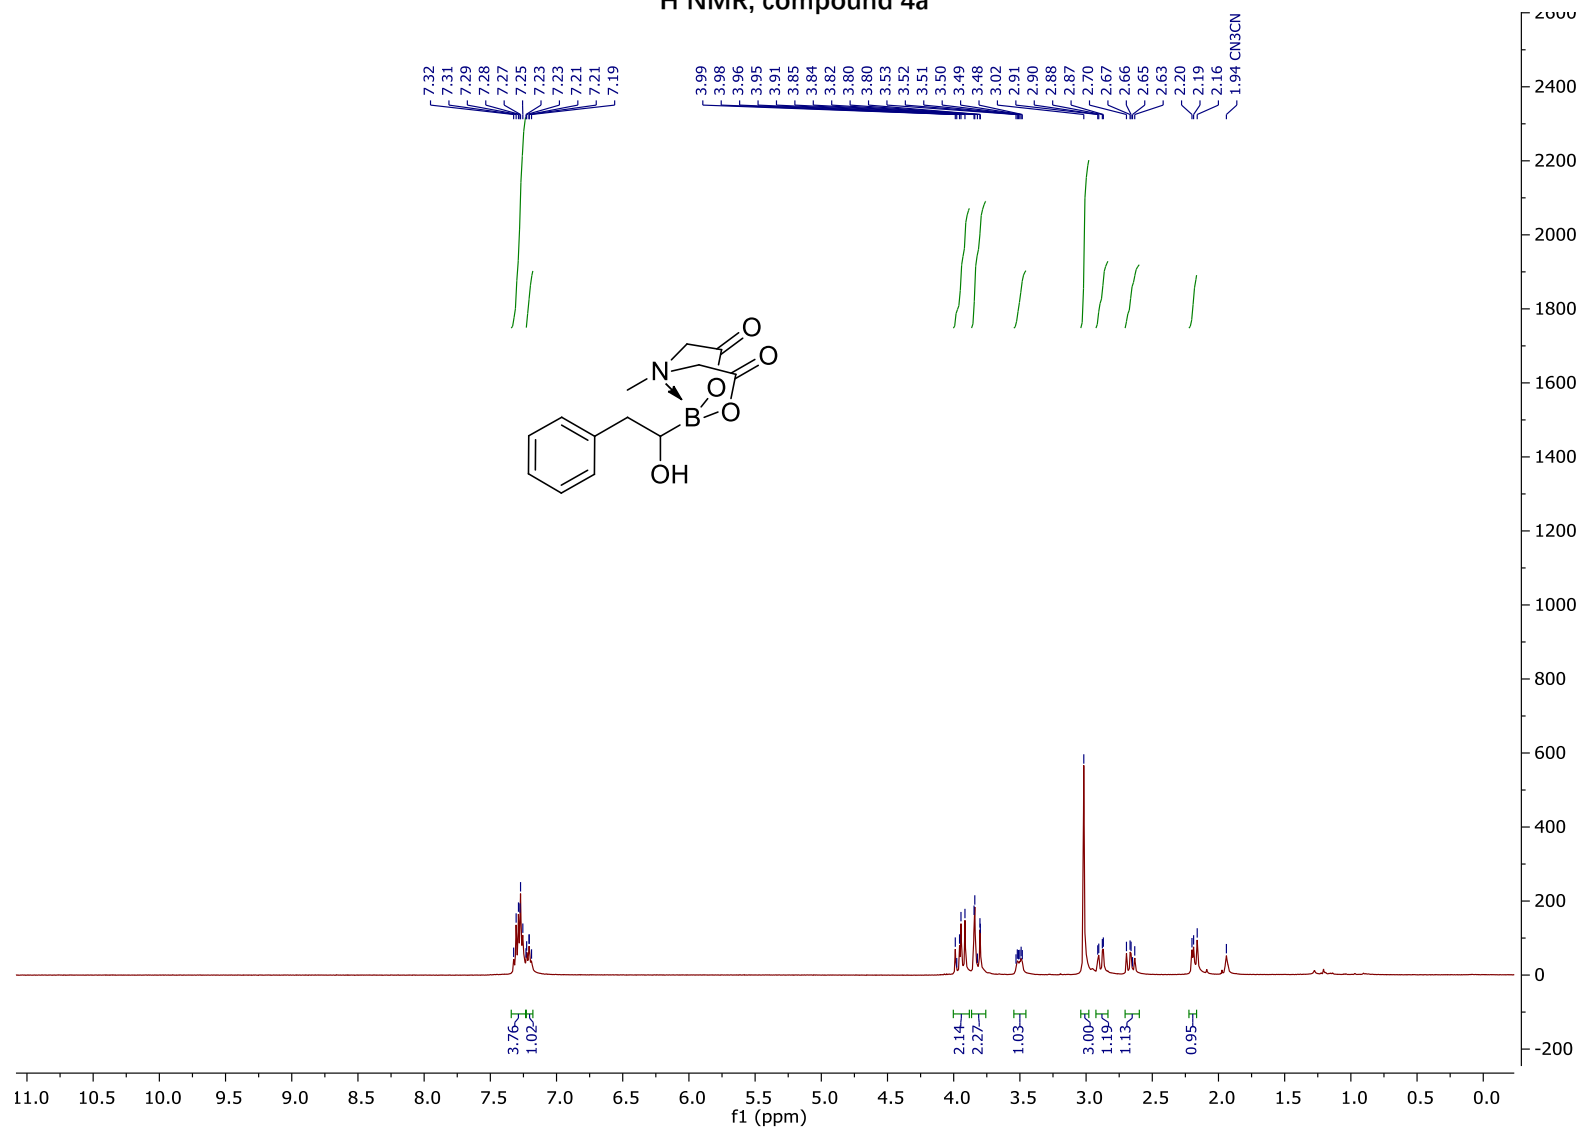

<sup>13</sup>C NMR, compound 4a

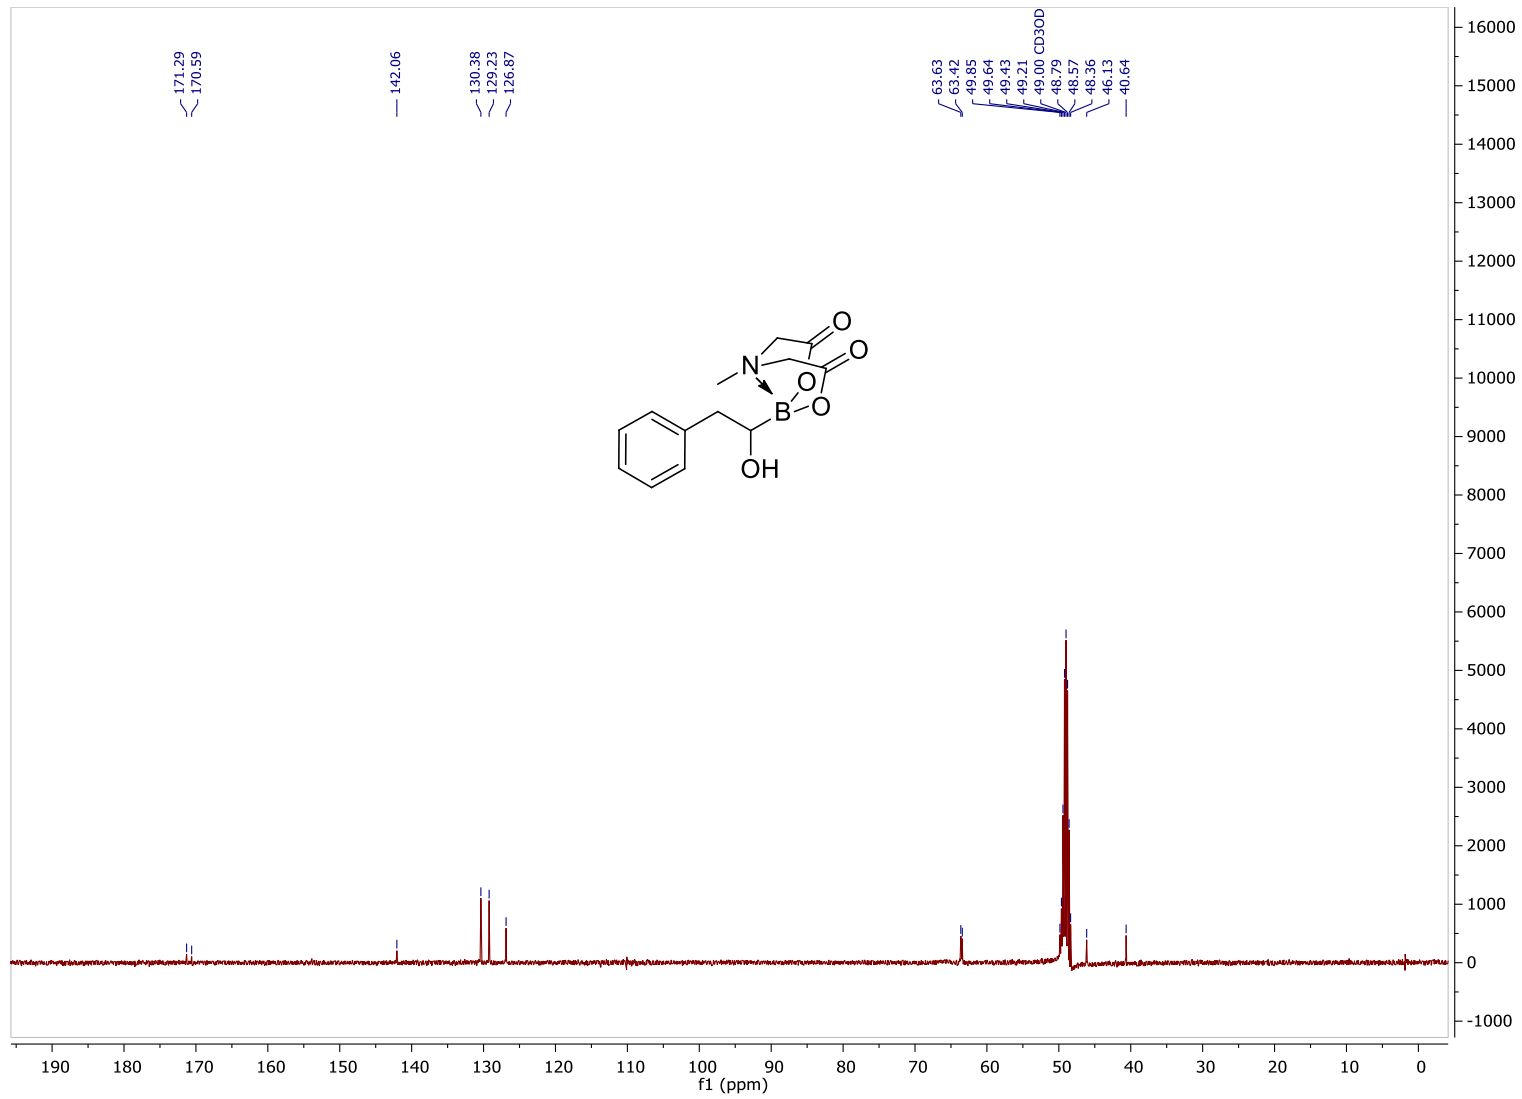

<sup>11</sup>B NMR, compound 4a

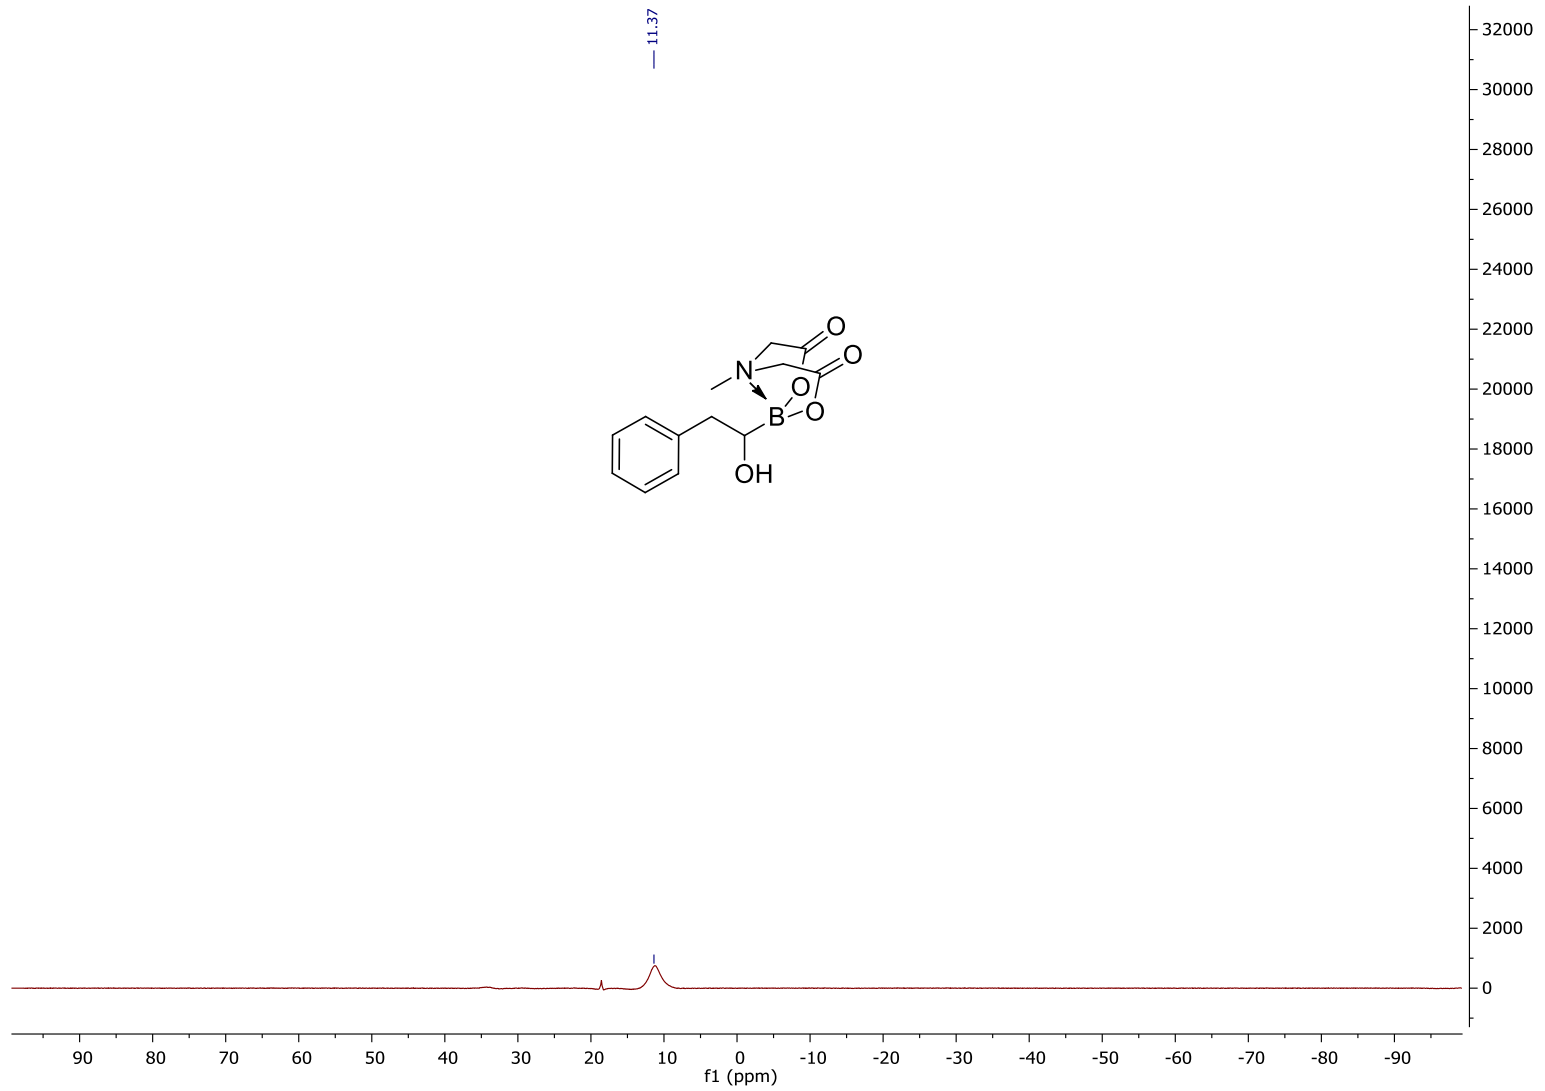

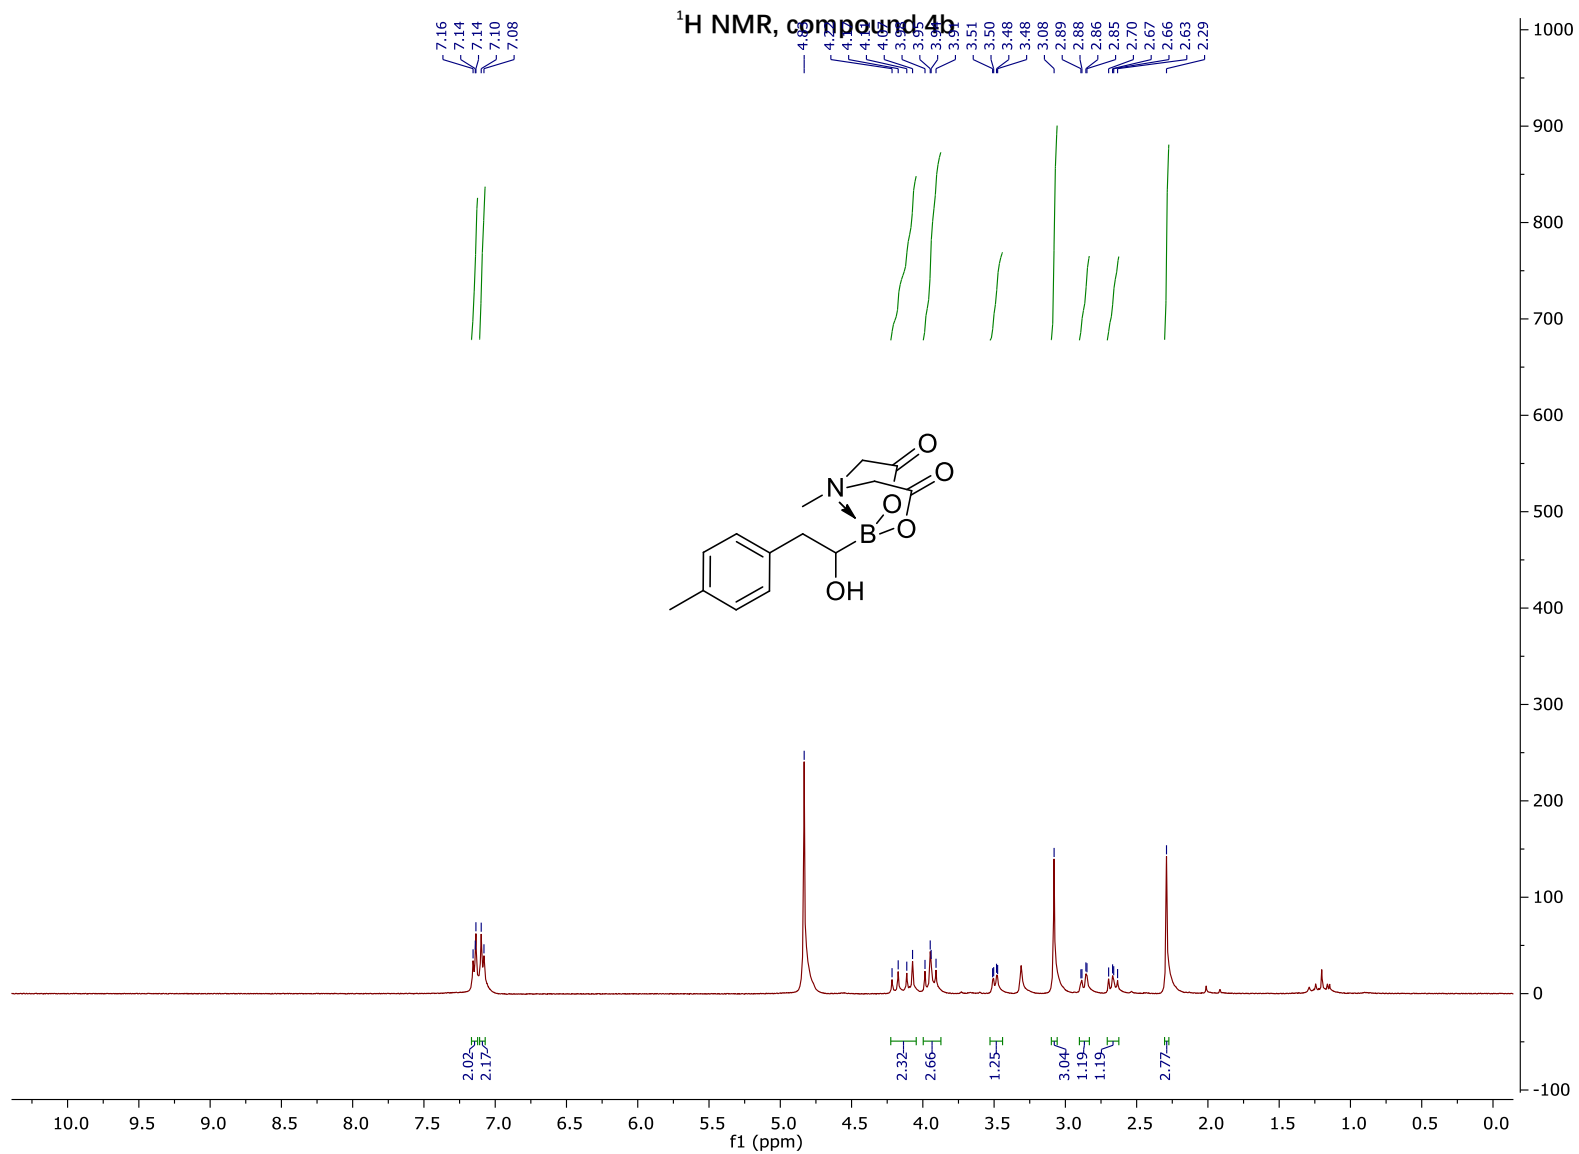

<sup>13</sup>C NMR, compound 4b

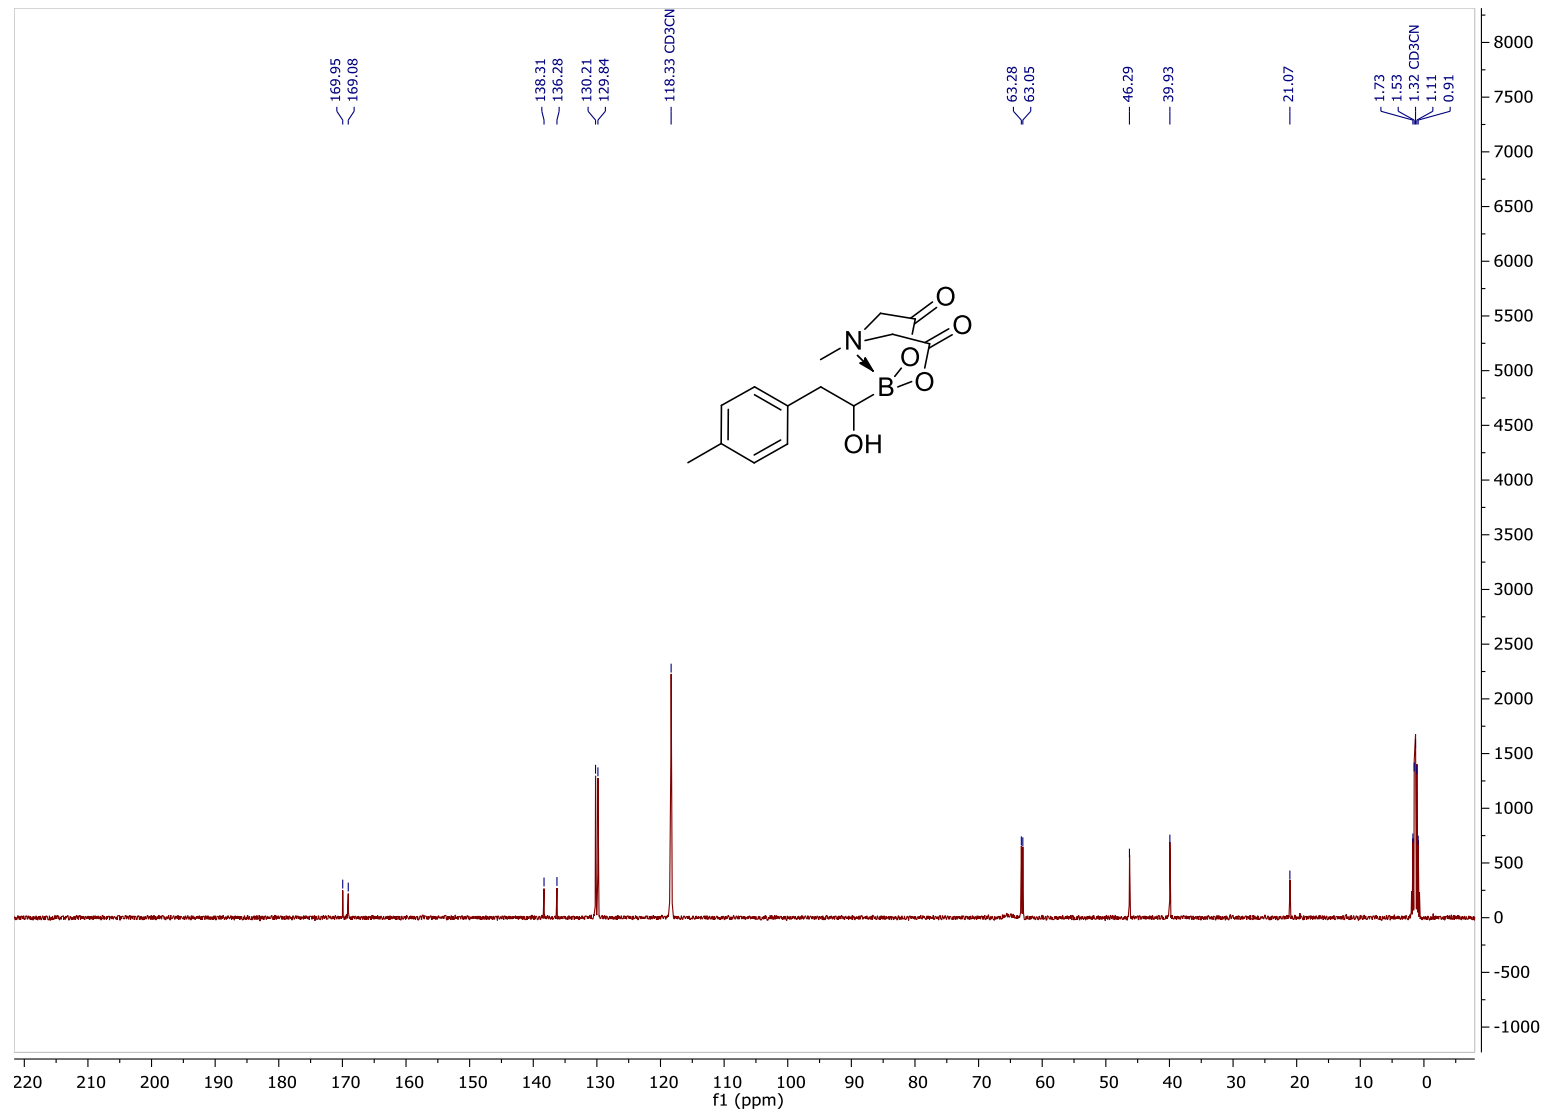



<sup>11</sup>B NMR, compound 4b

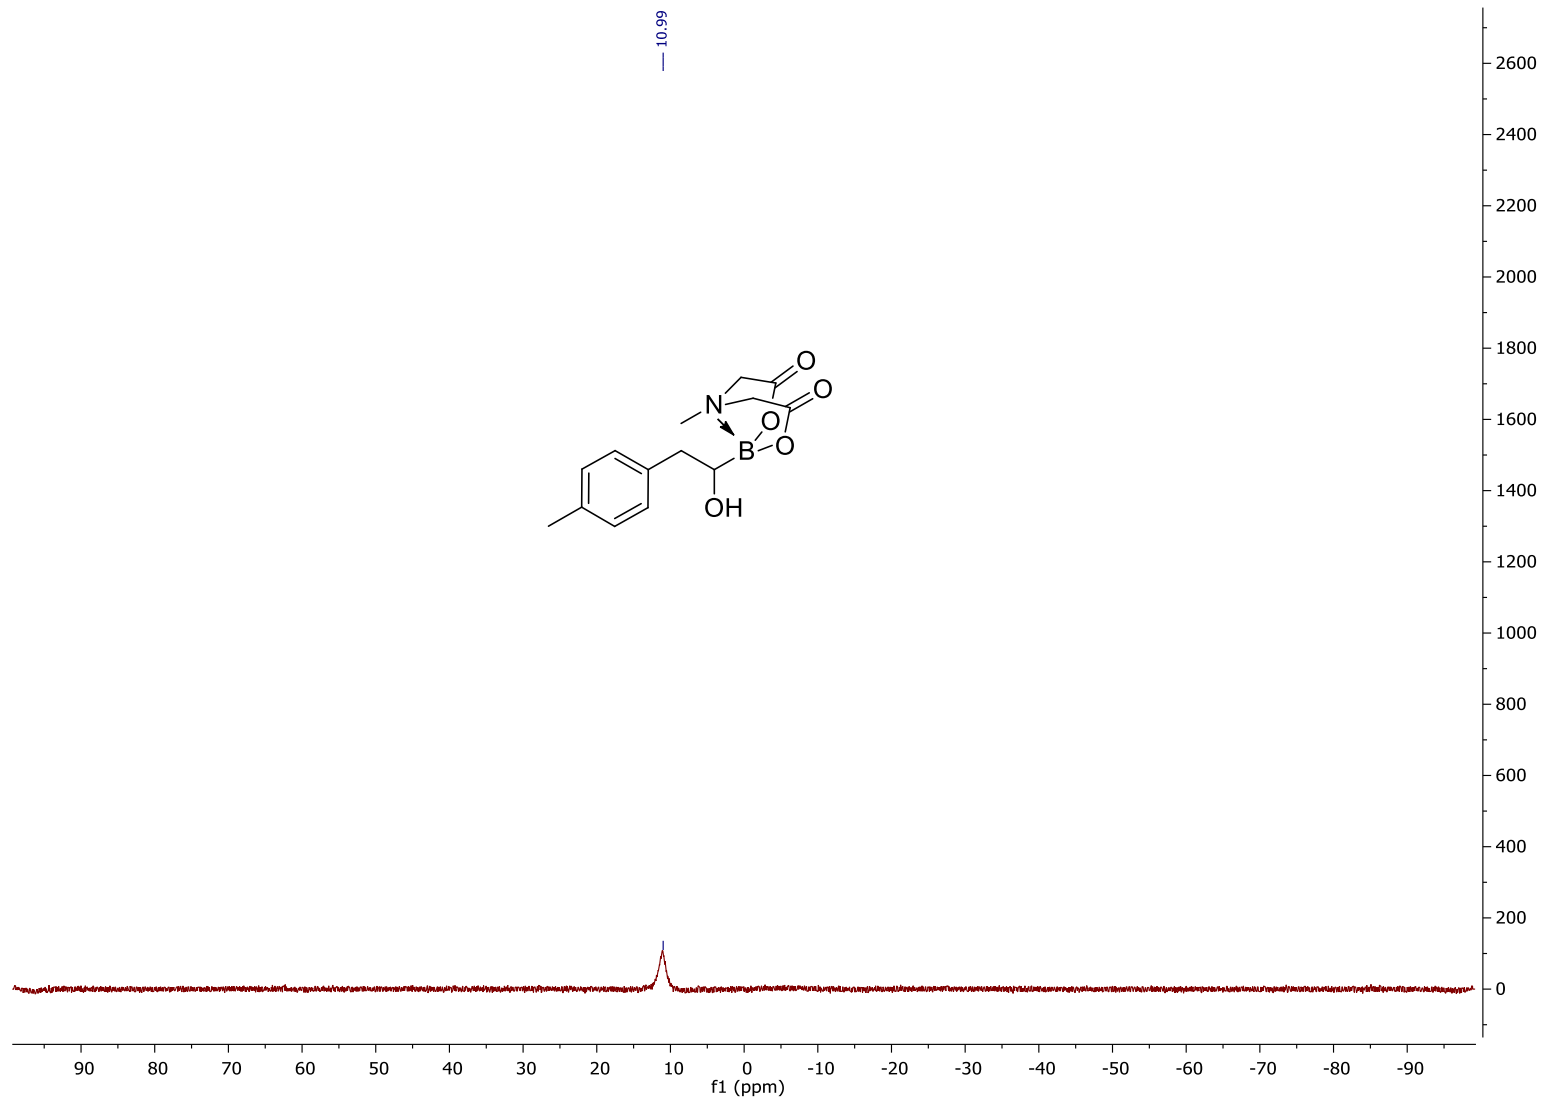

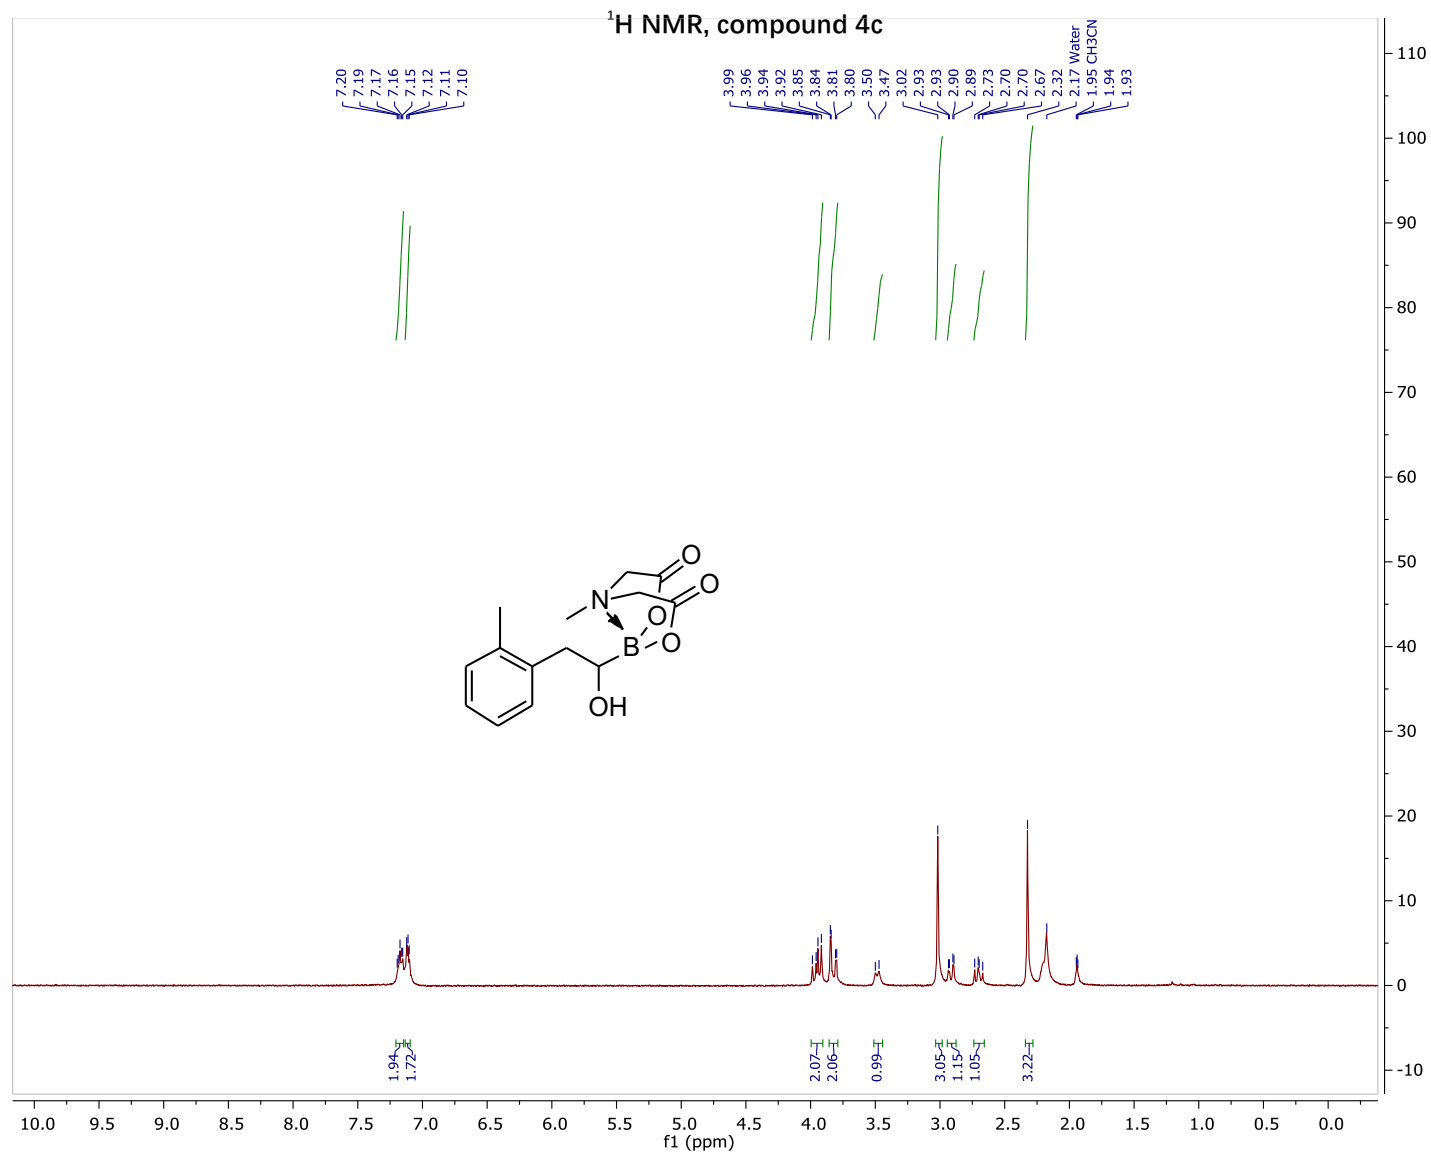

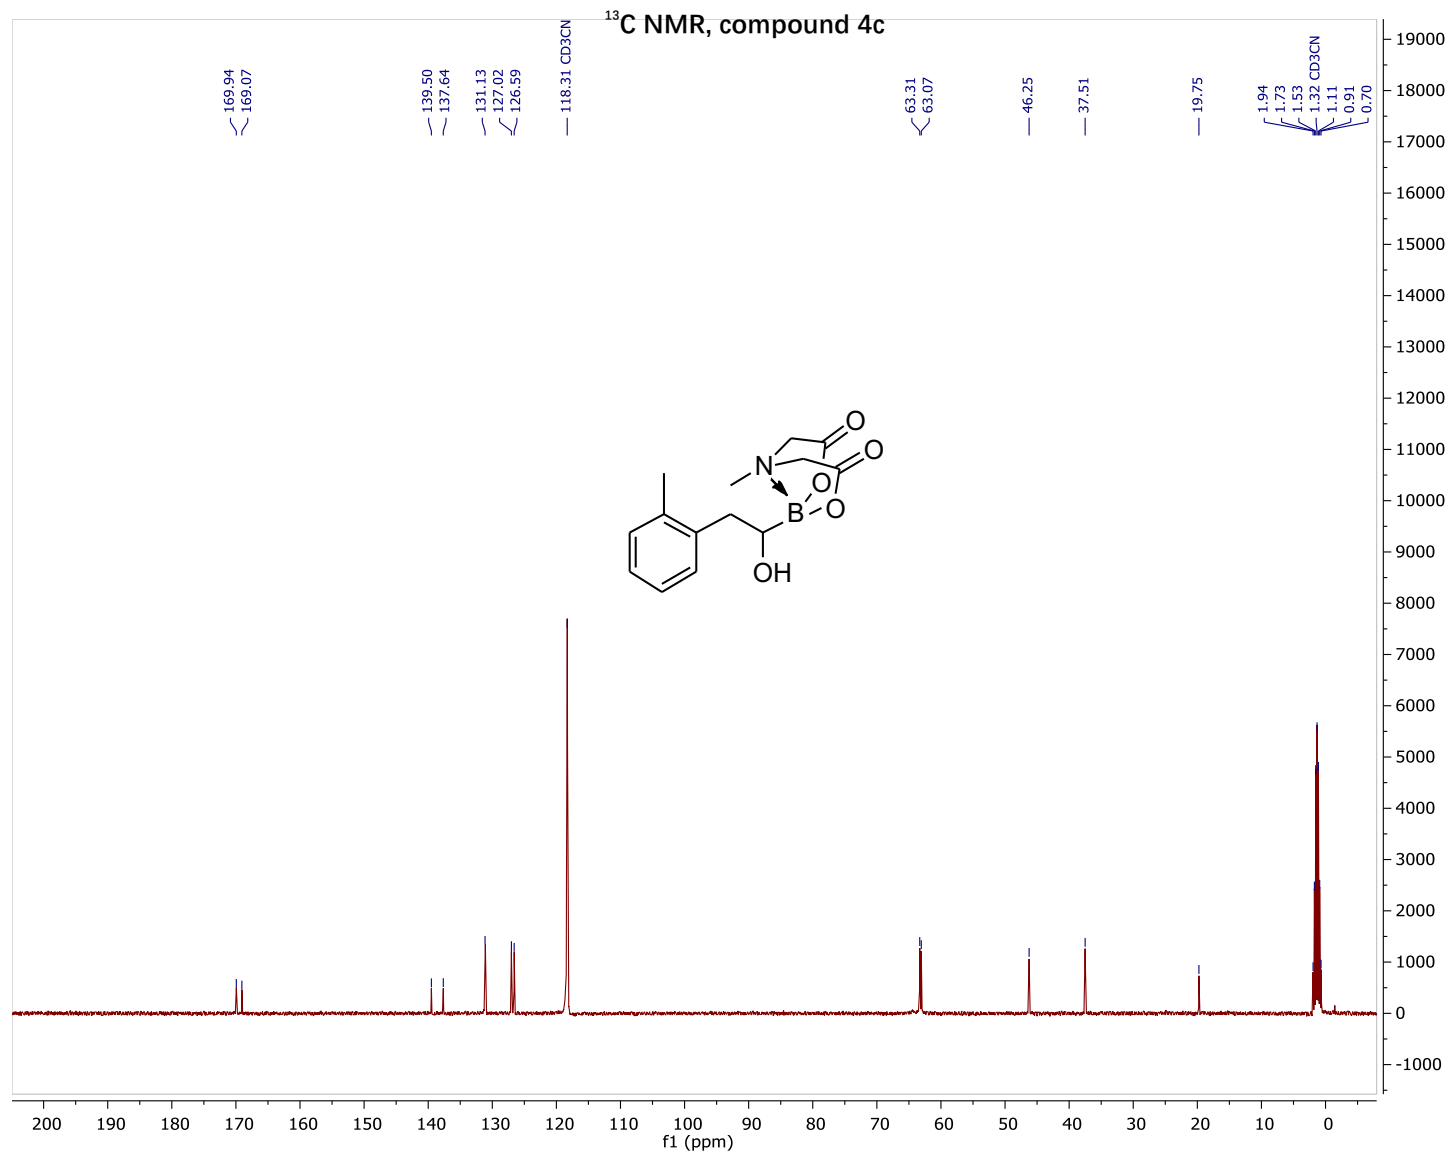

<sup>11</sup>B NMR, compound 4c

10.97

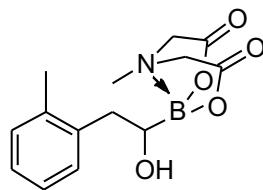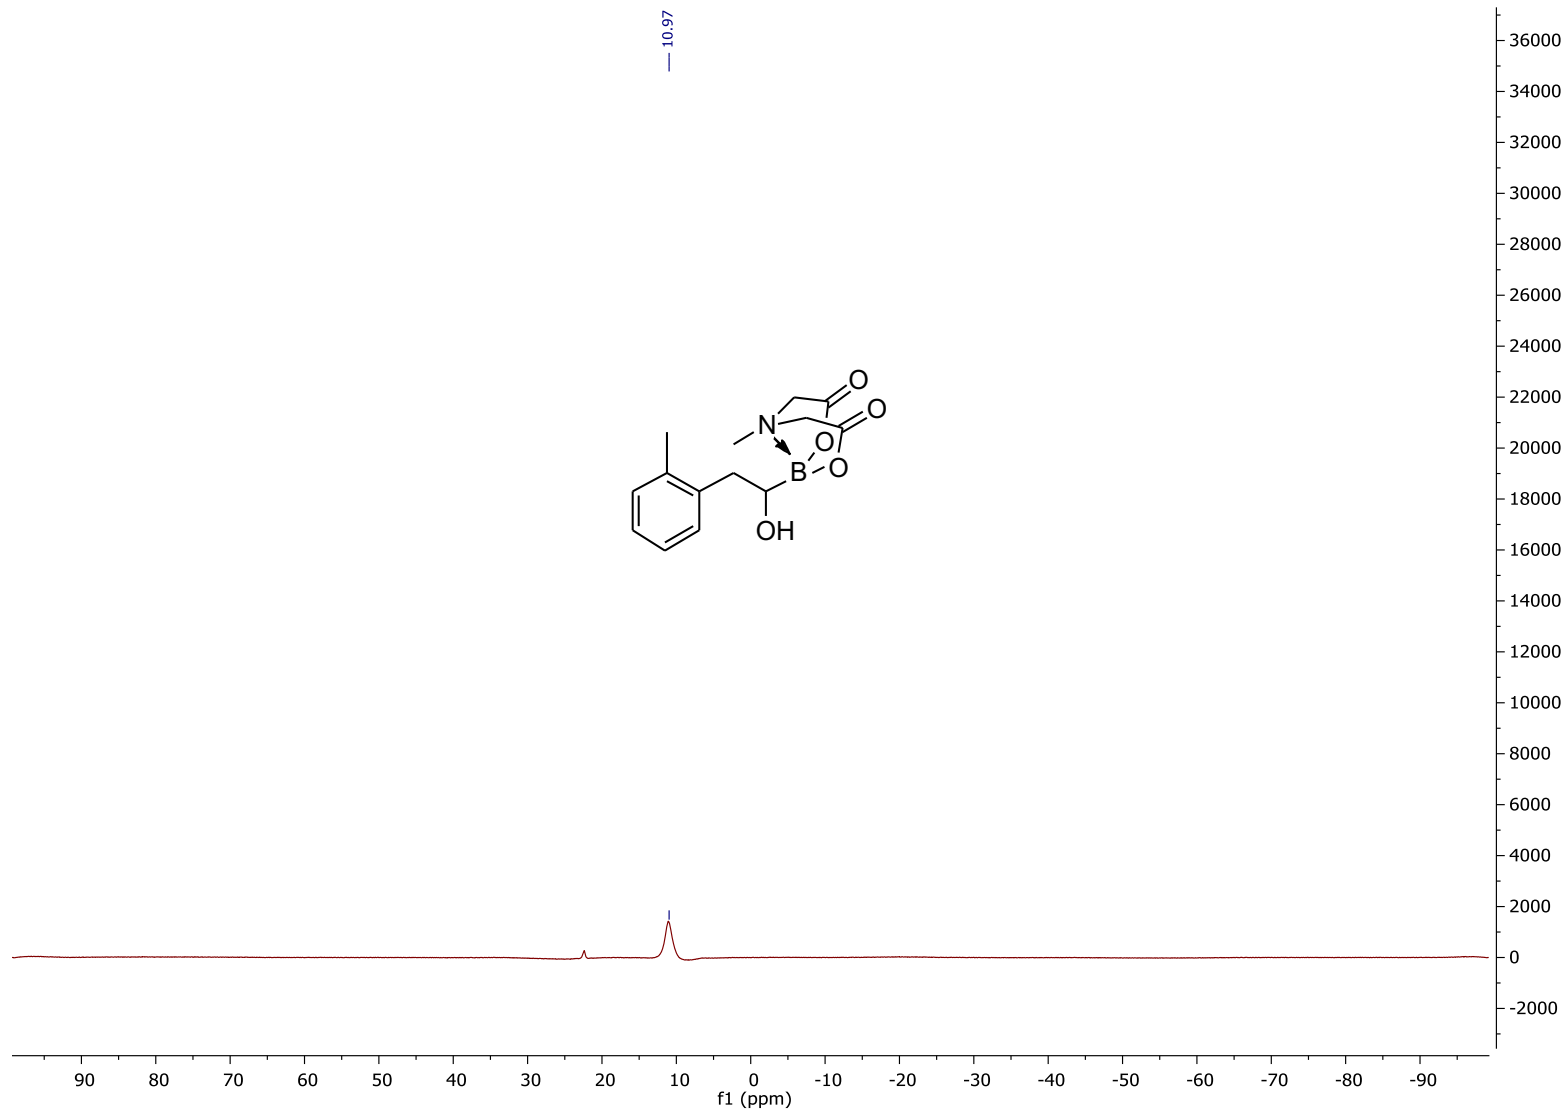

<sup>1</sup>H NMR, compound 4d

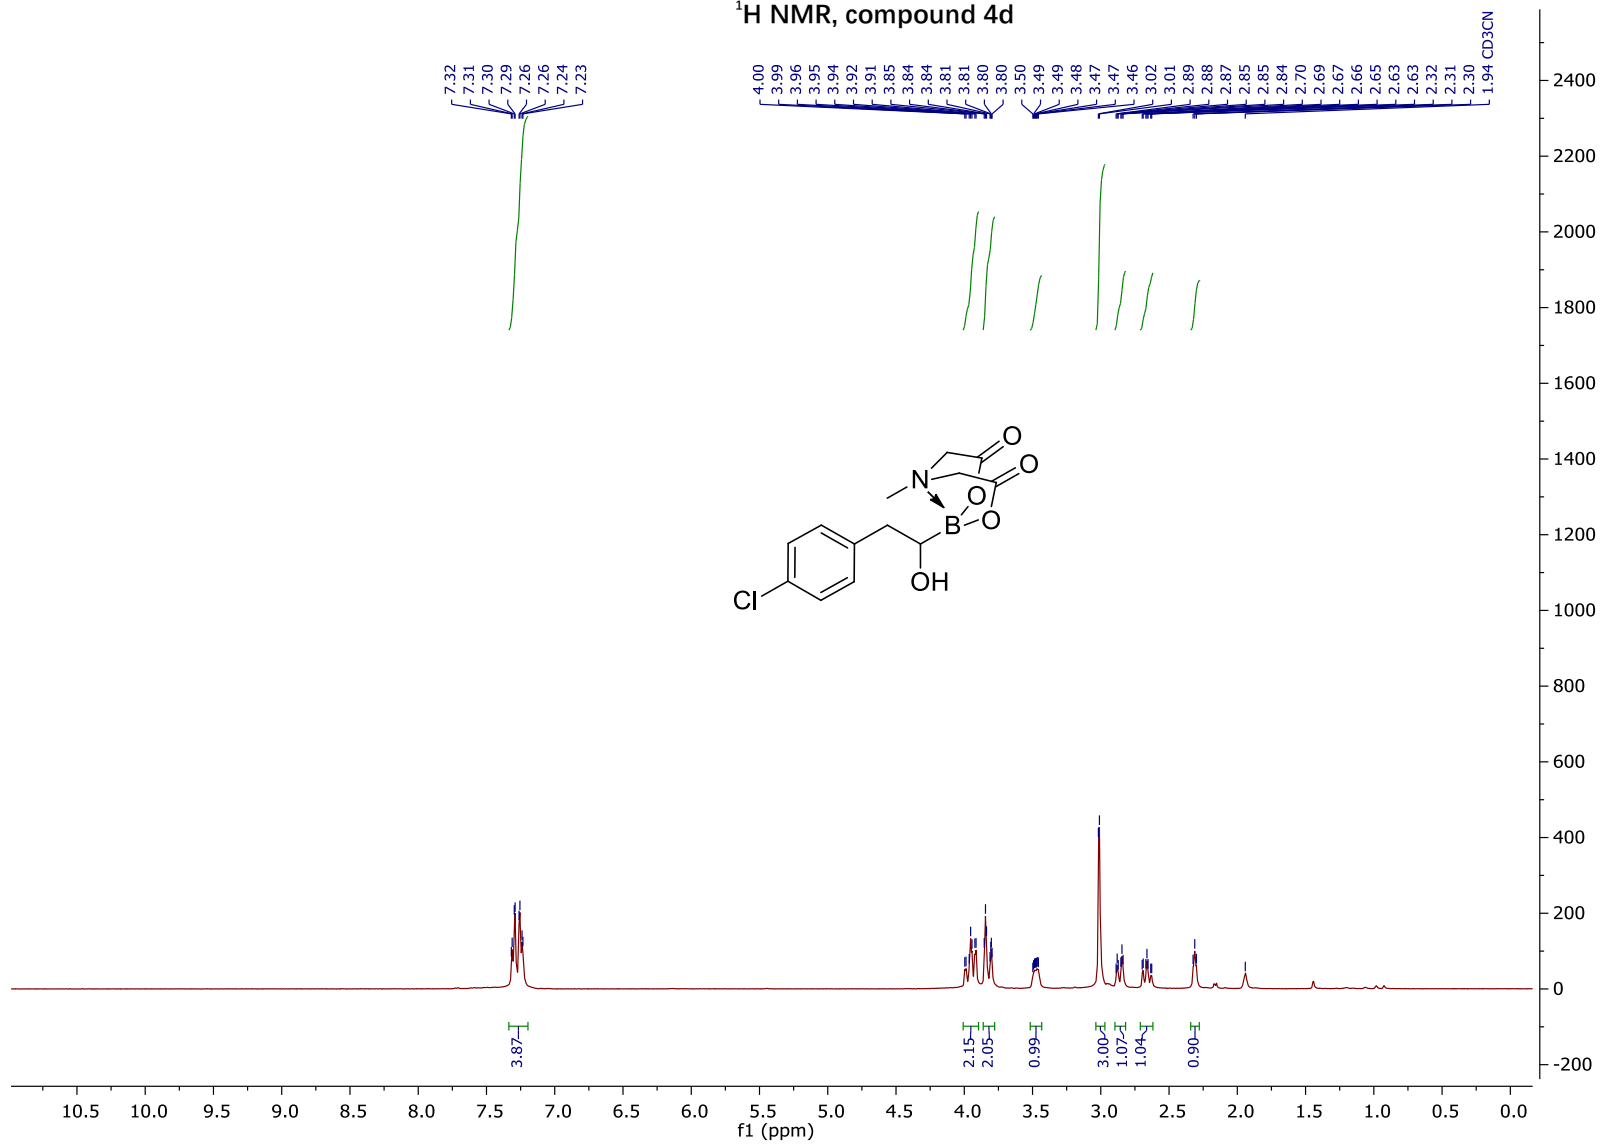

<sup>13</sup>C NMR, compound 4d

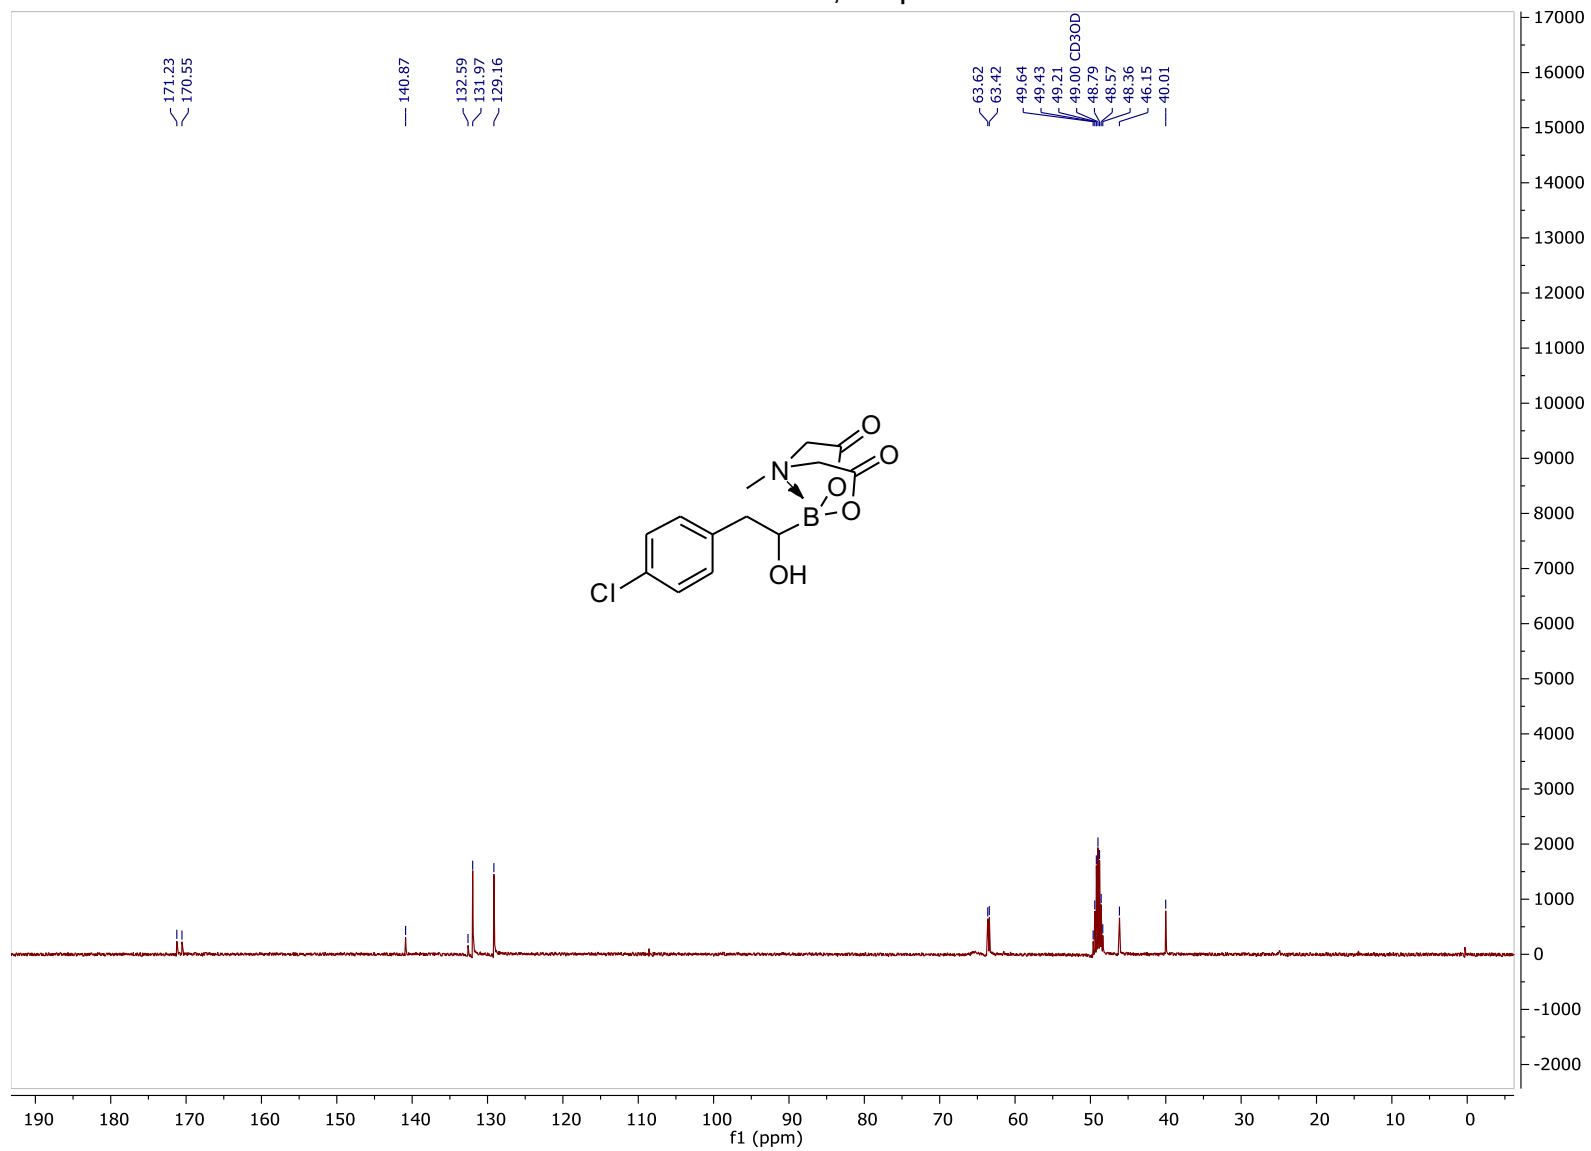

<sup>11</sup>B NMR, compound 4d

11.16

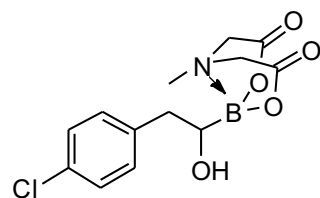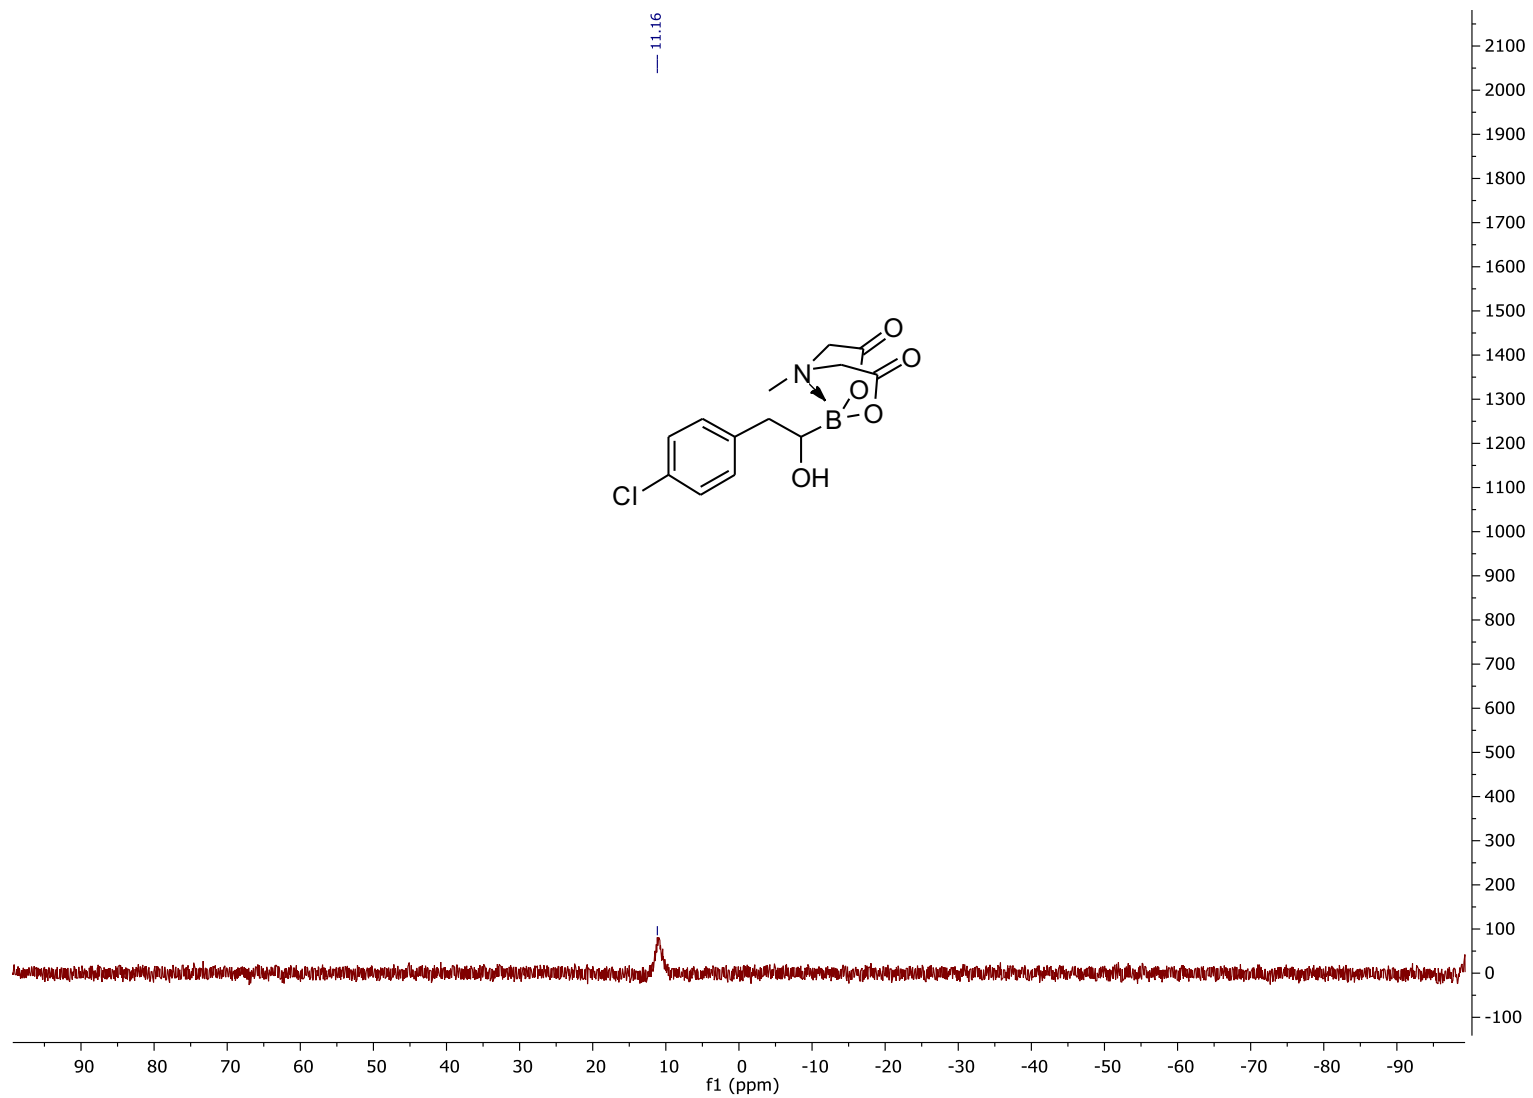

<sup>1</sup>H NMR, compound 4e

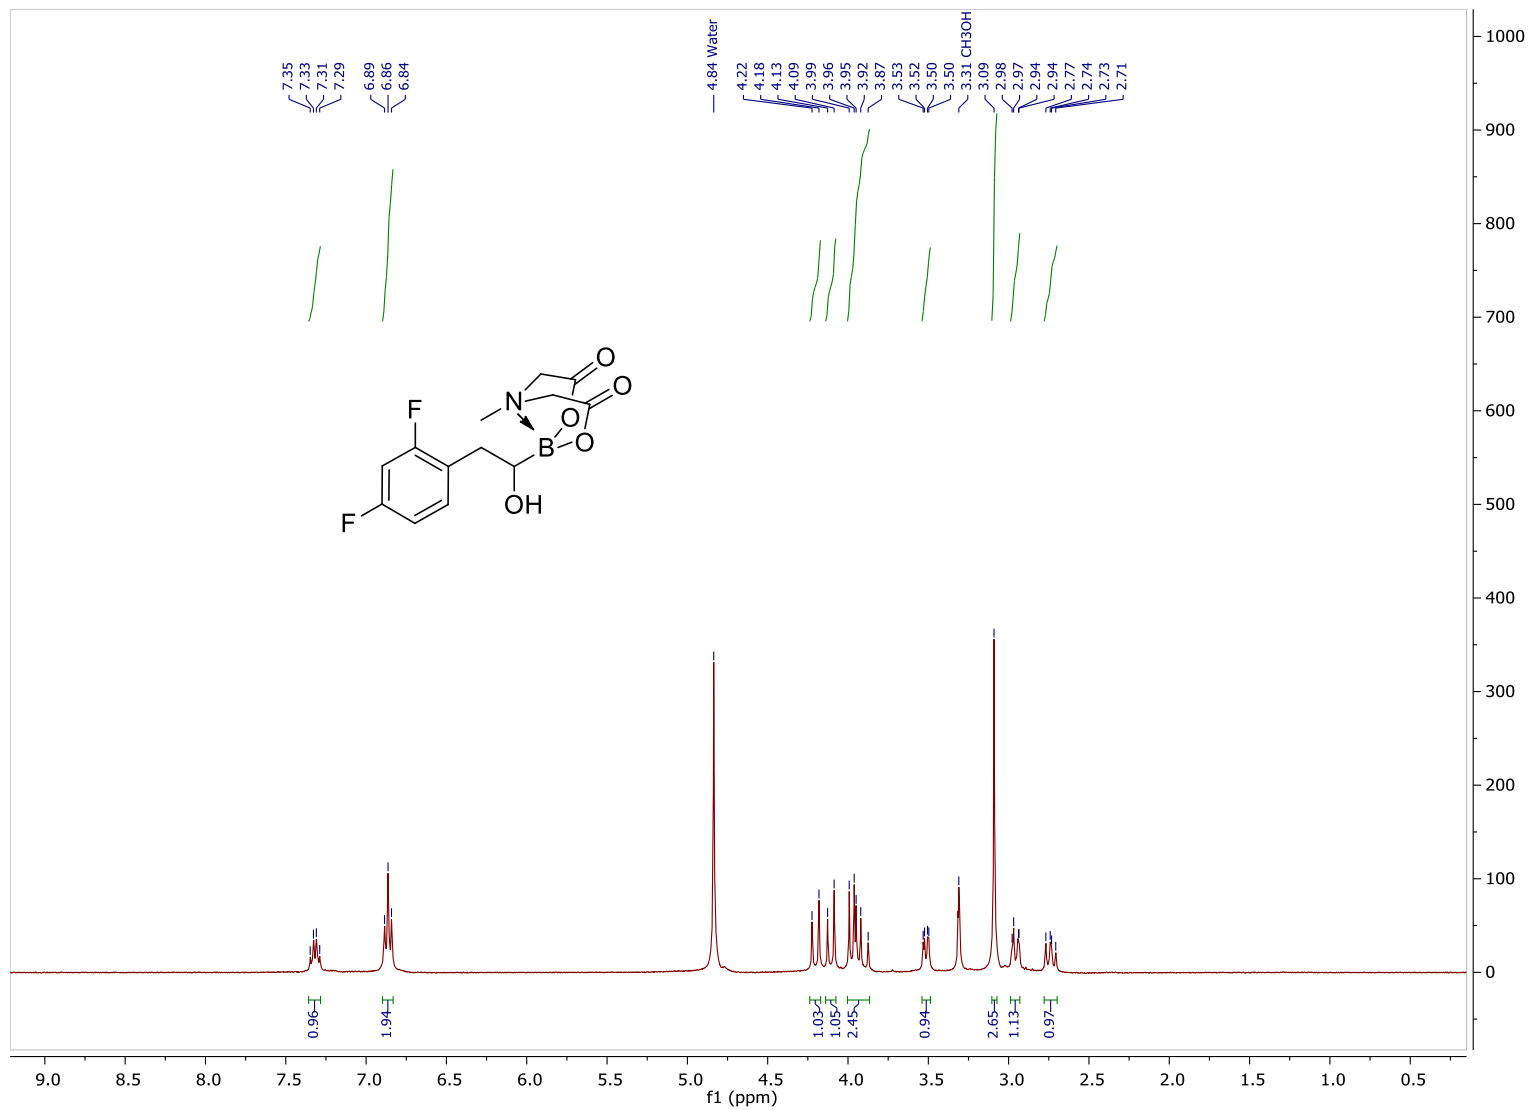



<sup>13</sup>C NMR, compound 4e

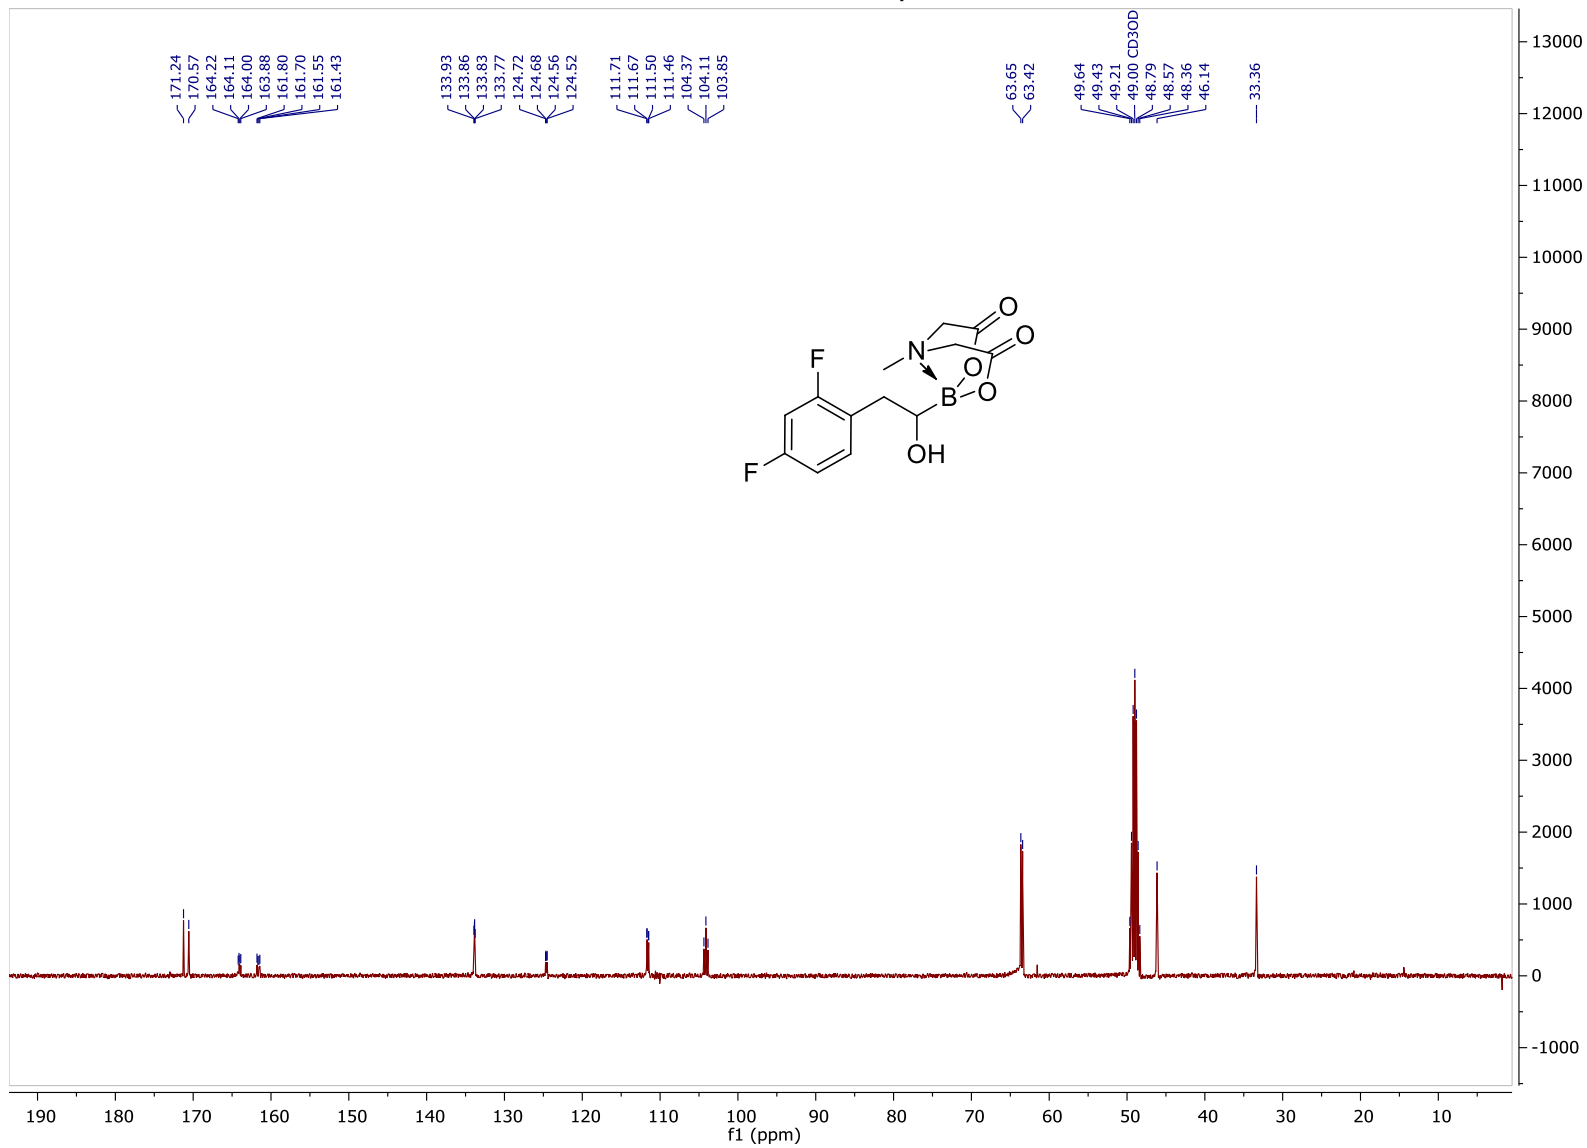

<sup>11</sup>B NMR, compound 4e

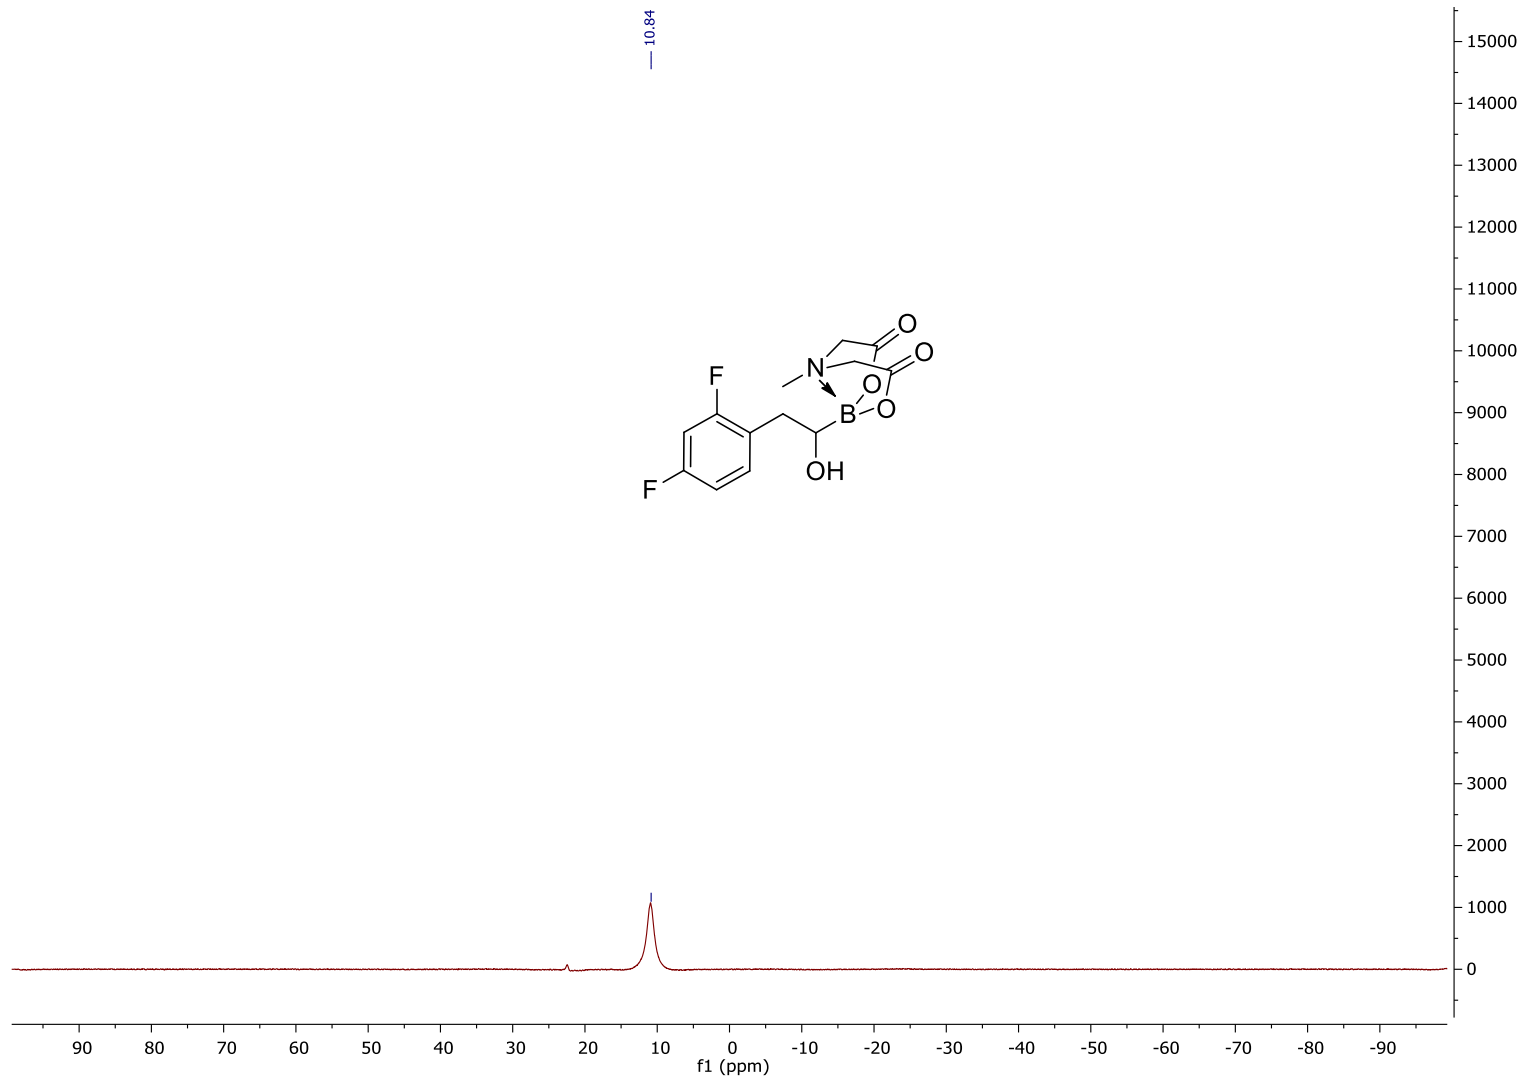

<sup>19</sup>F NMR, compound 4e

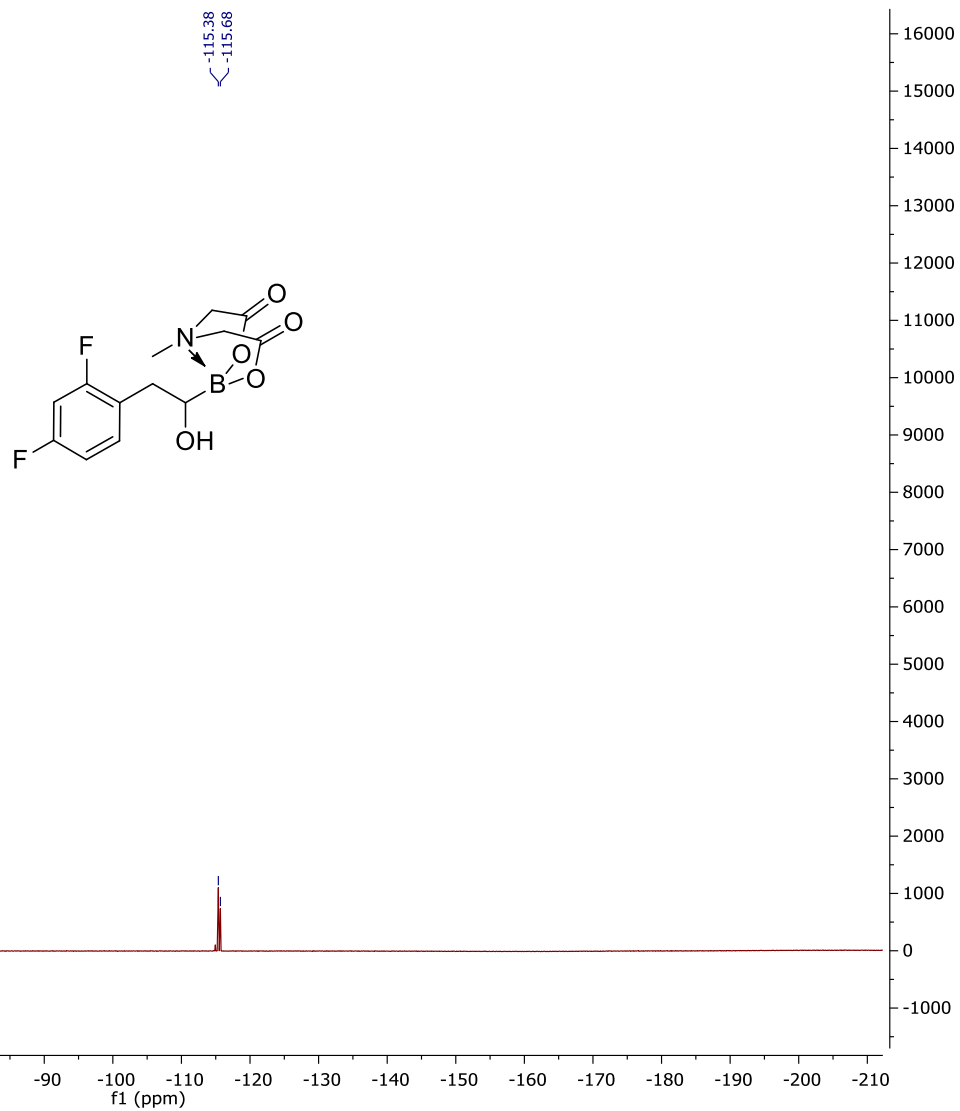

<sup>1</sup>H NMR, compound 4f

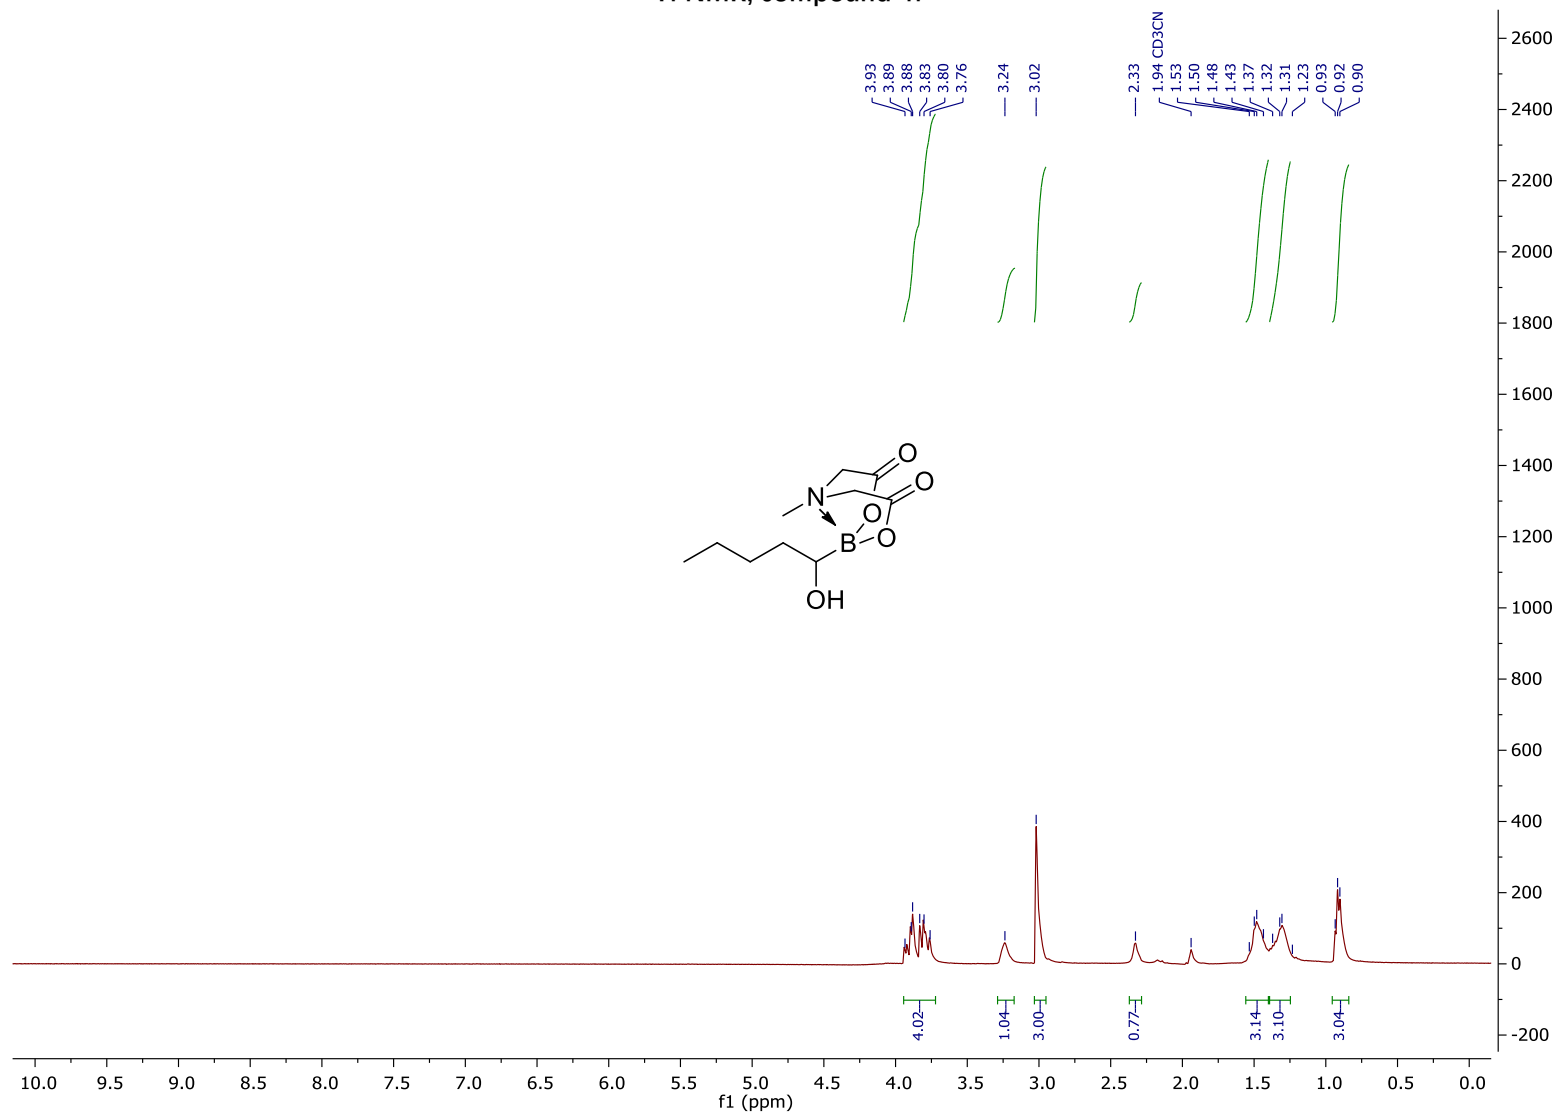

<sup>13</sup>C NMR, compound 4f

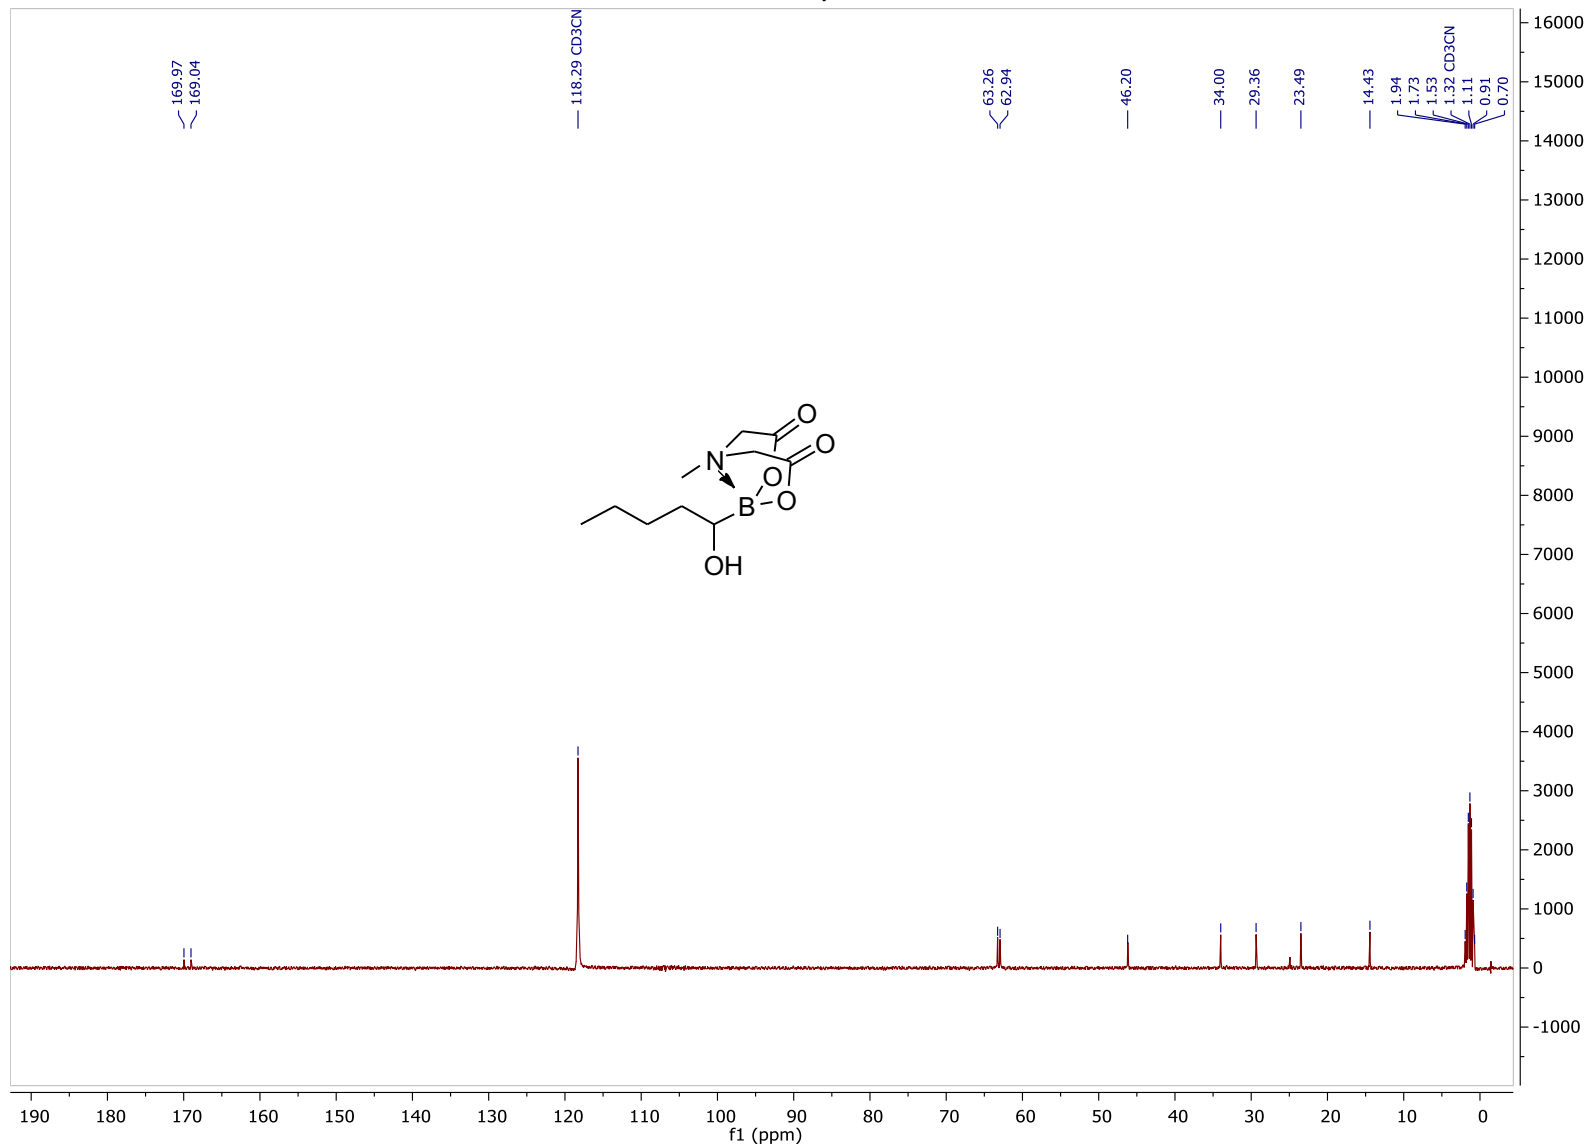

<sup>11</sup>B NMR, compound 4f

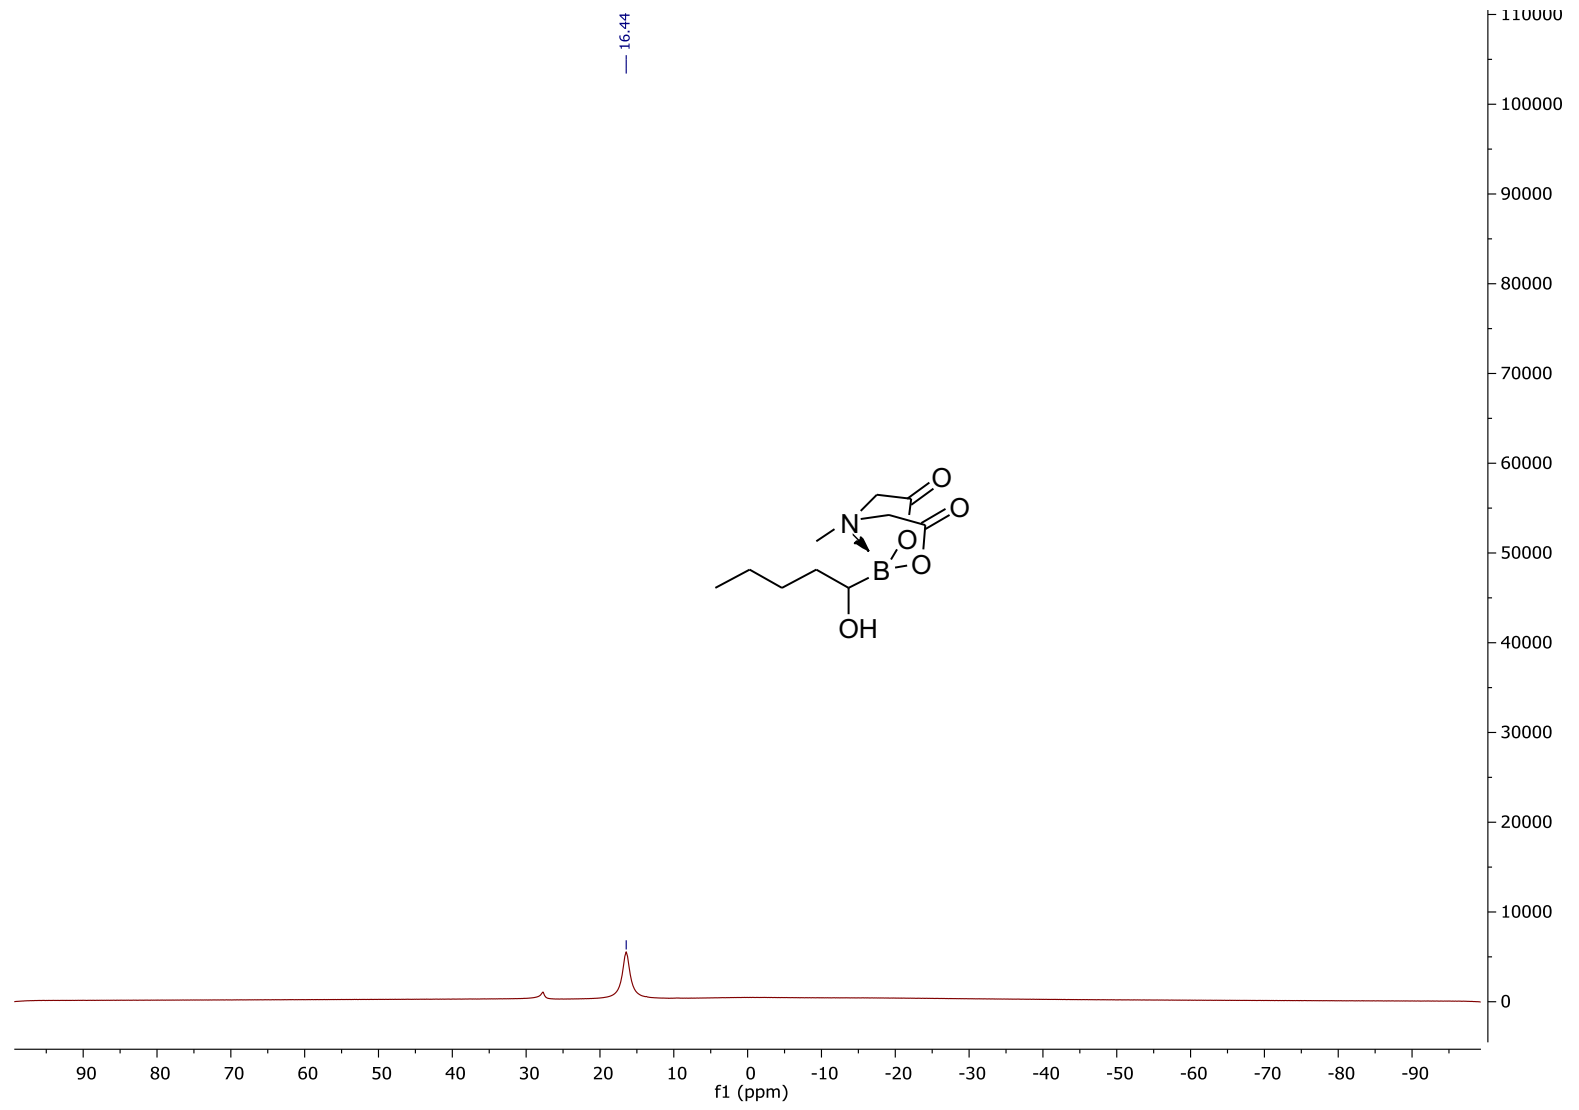

<sup>1</sup>H NMR, compound 4g

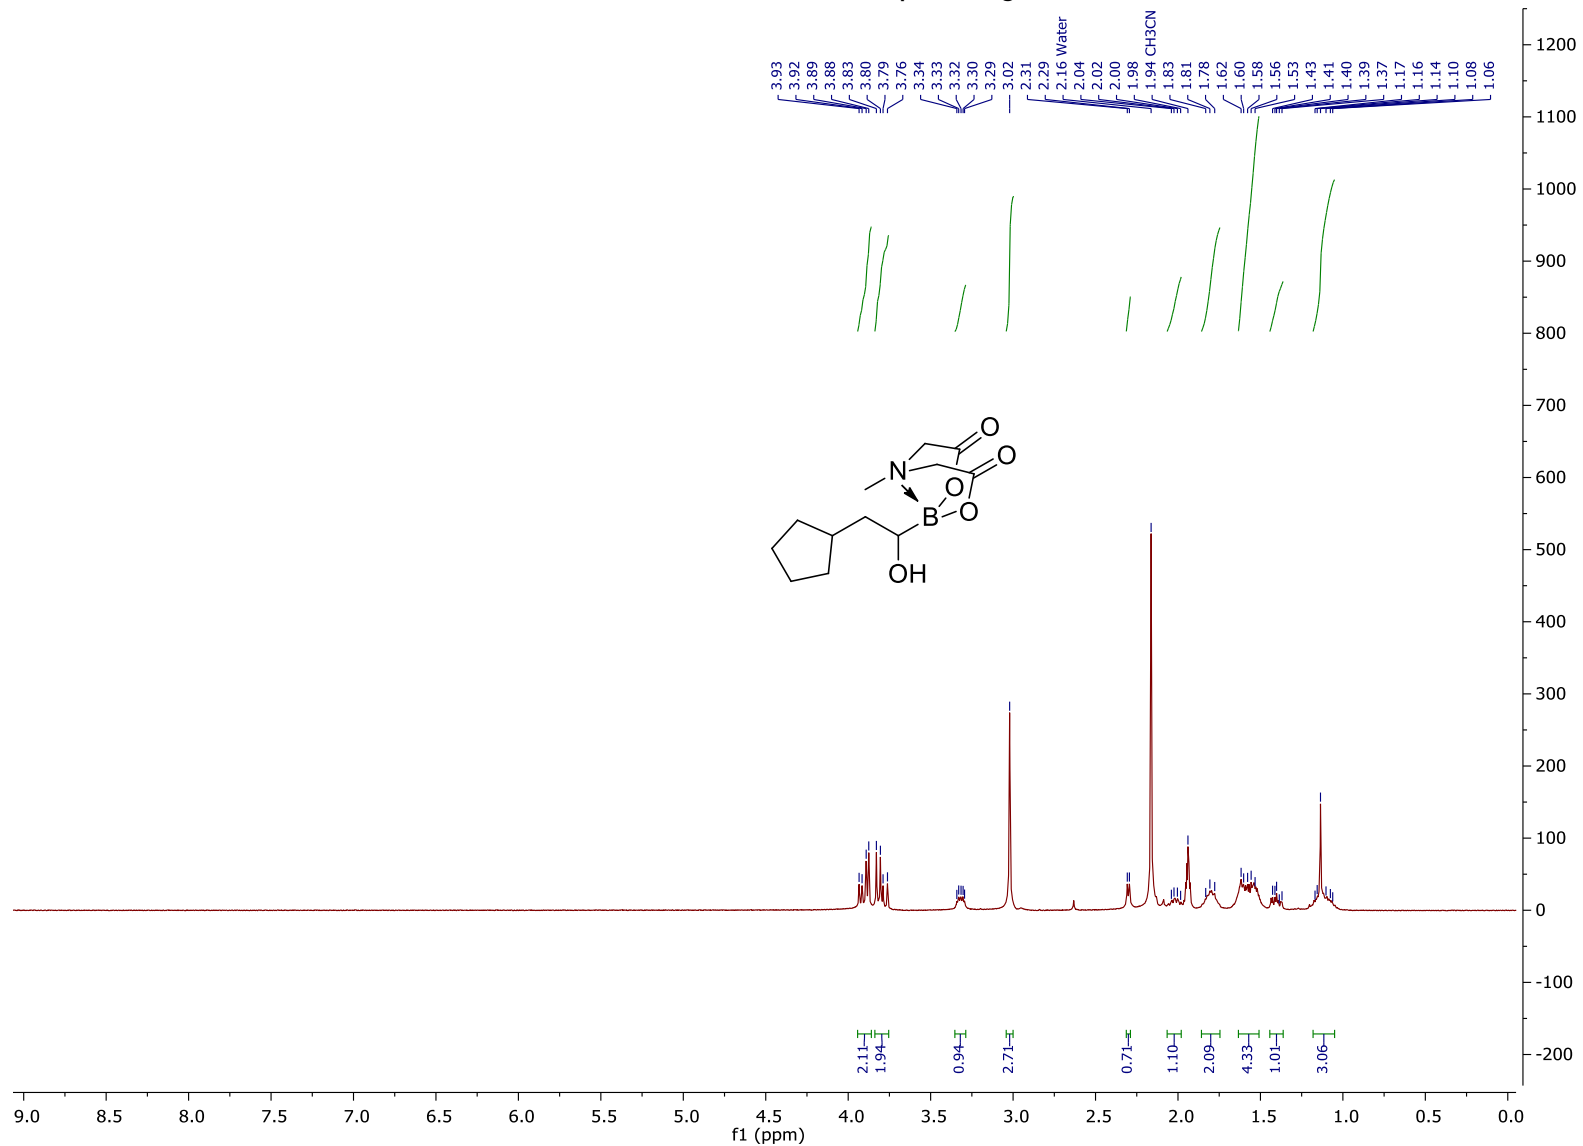

<sup>13</sup>C NMR, compound 4g

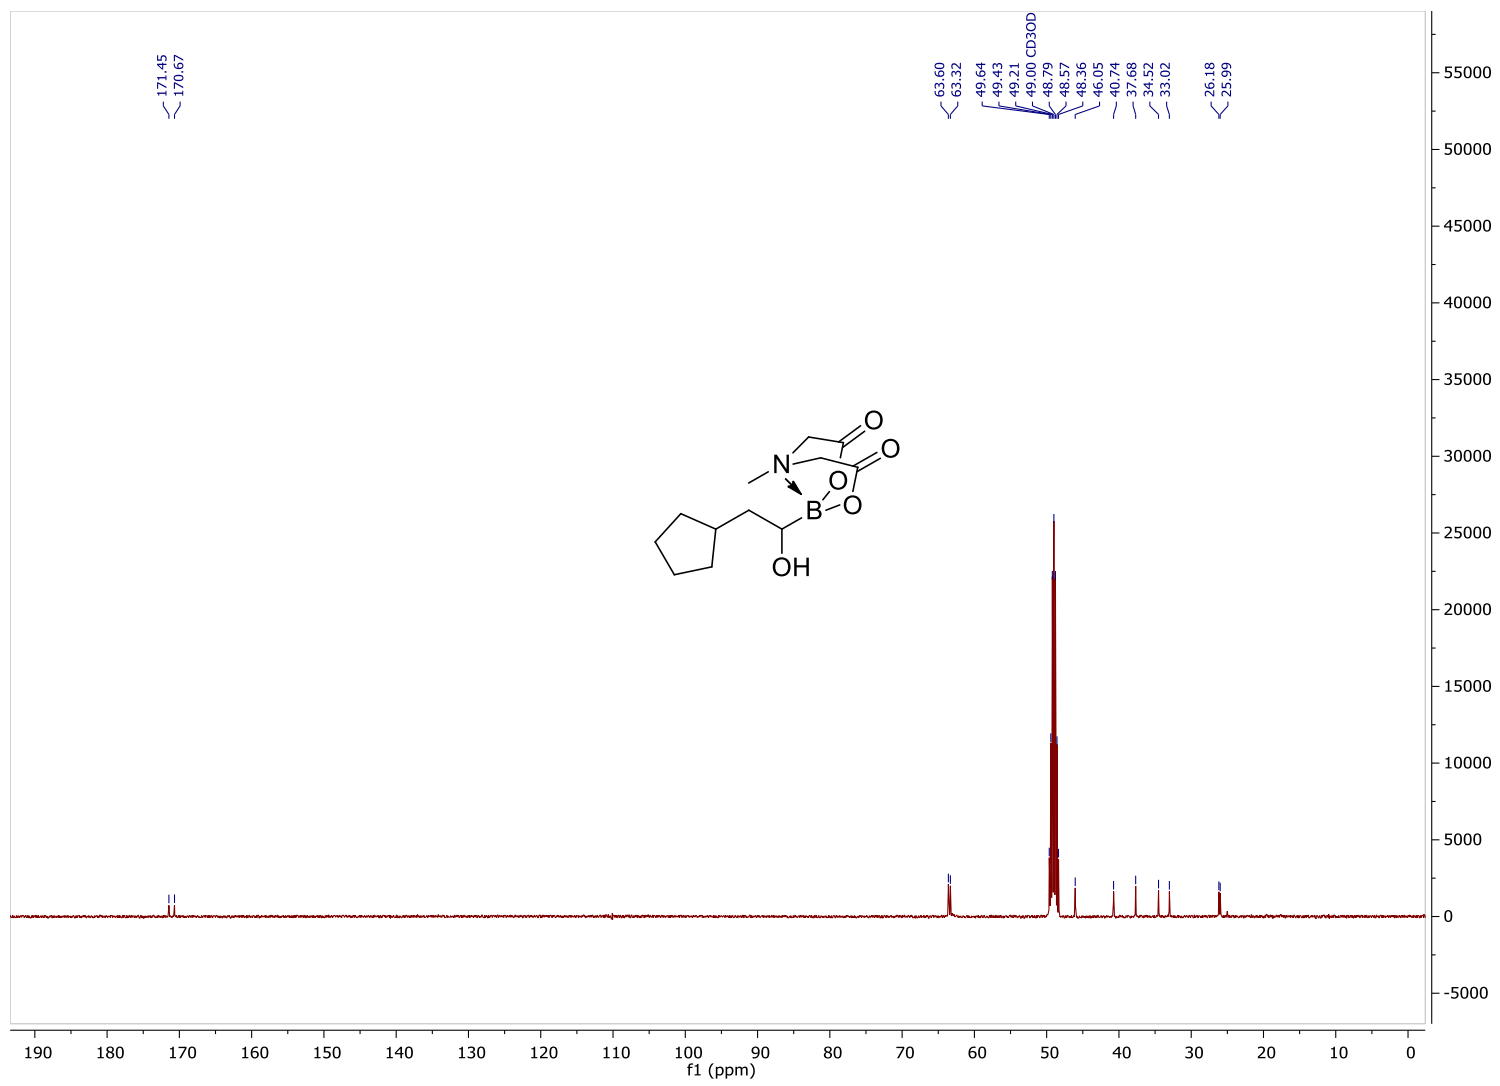



<sup>11</sup>B NMR, compound 4g

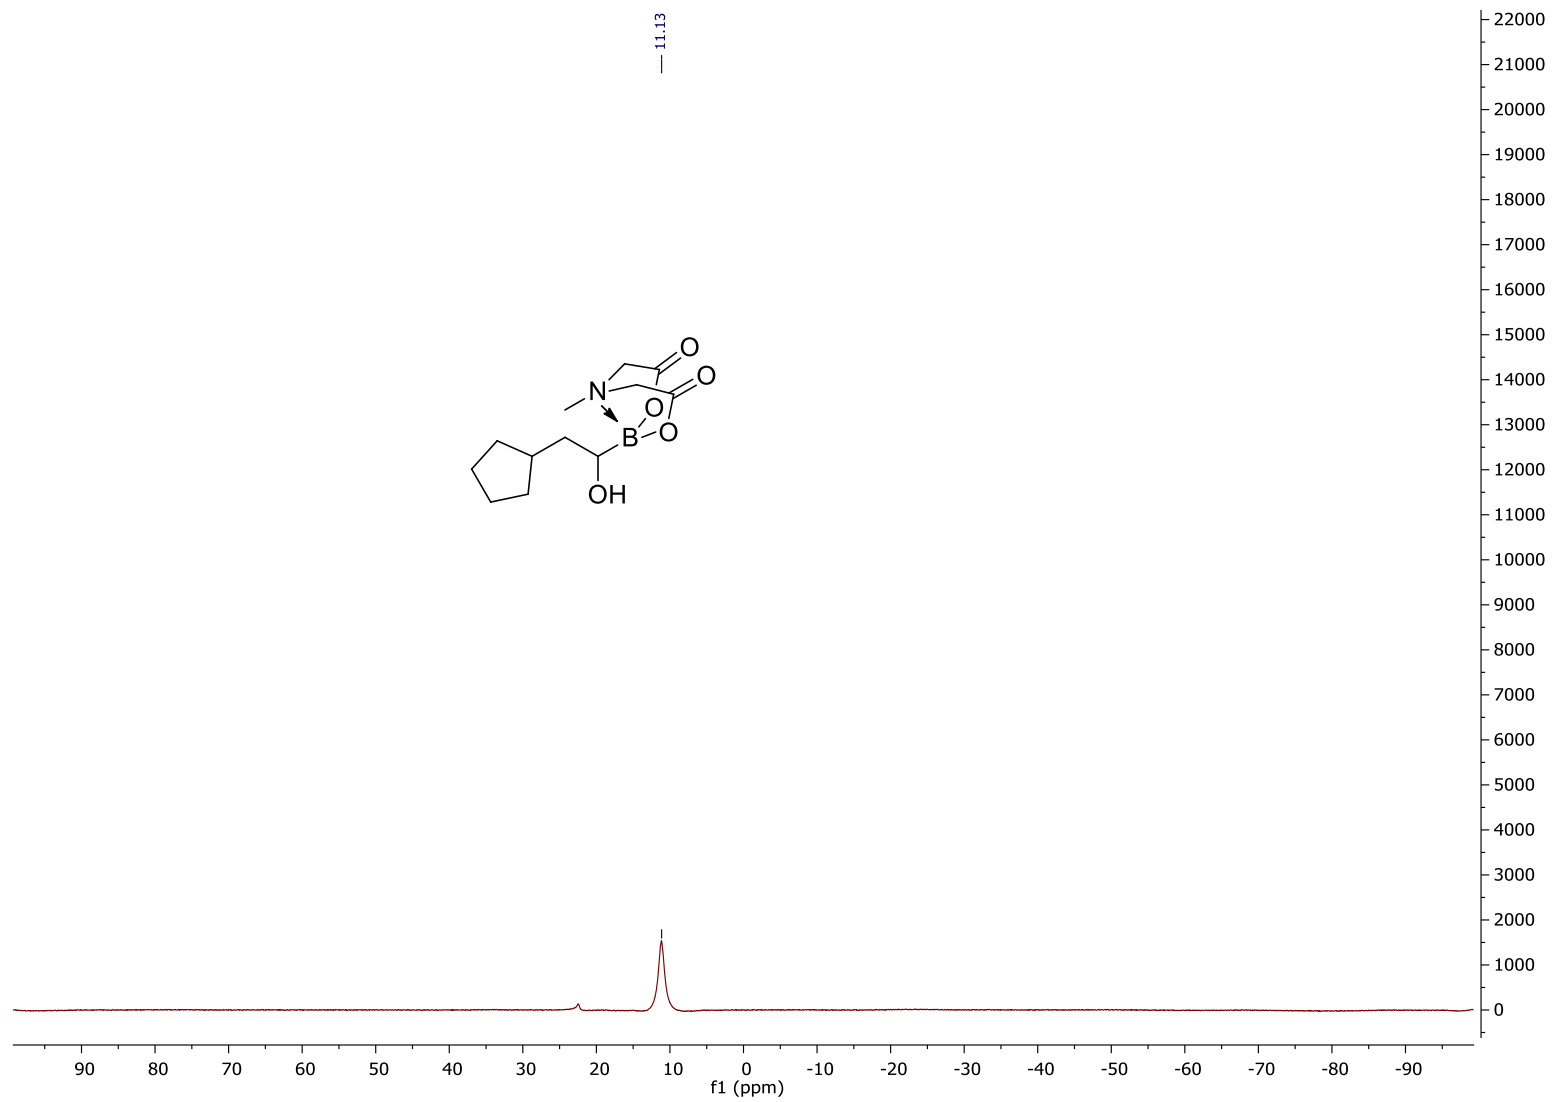

<sup>1</sup>H NMR, compound 4h

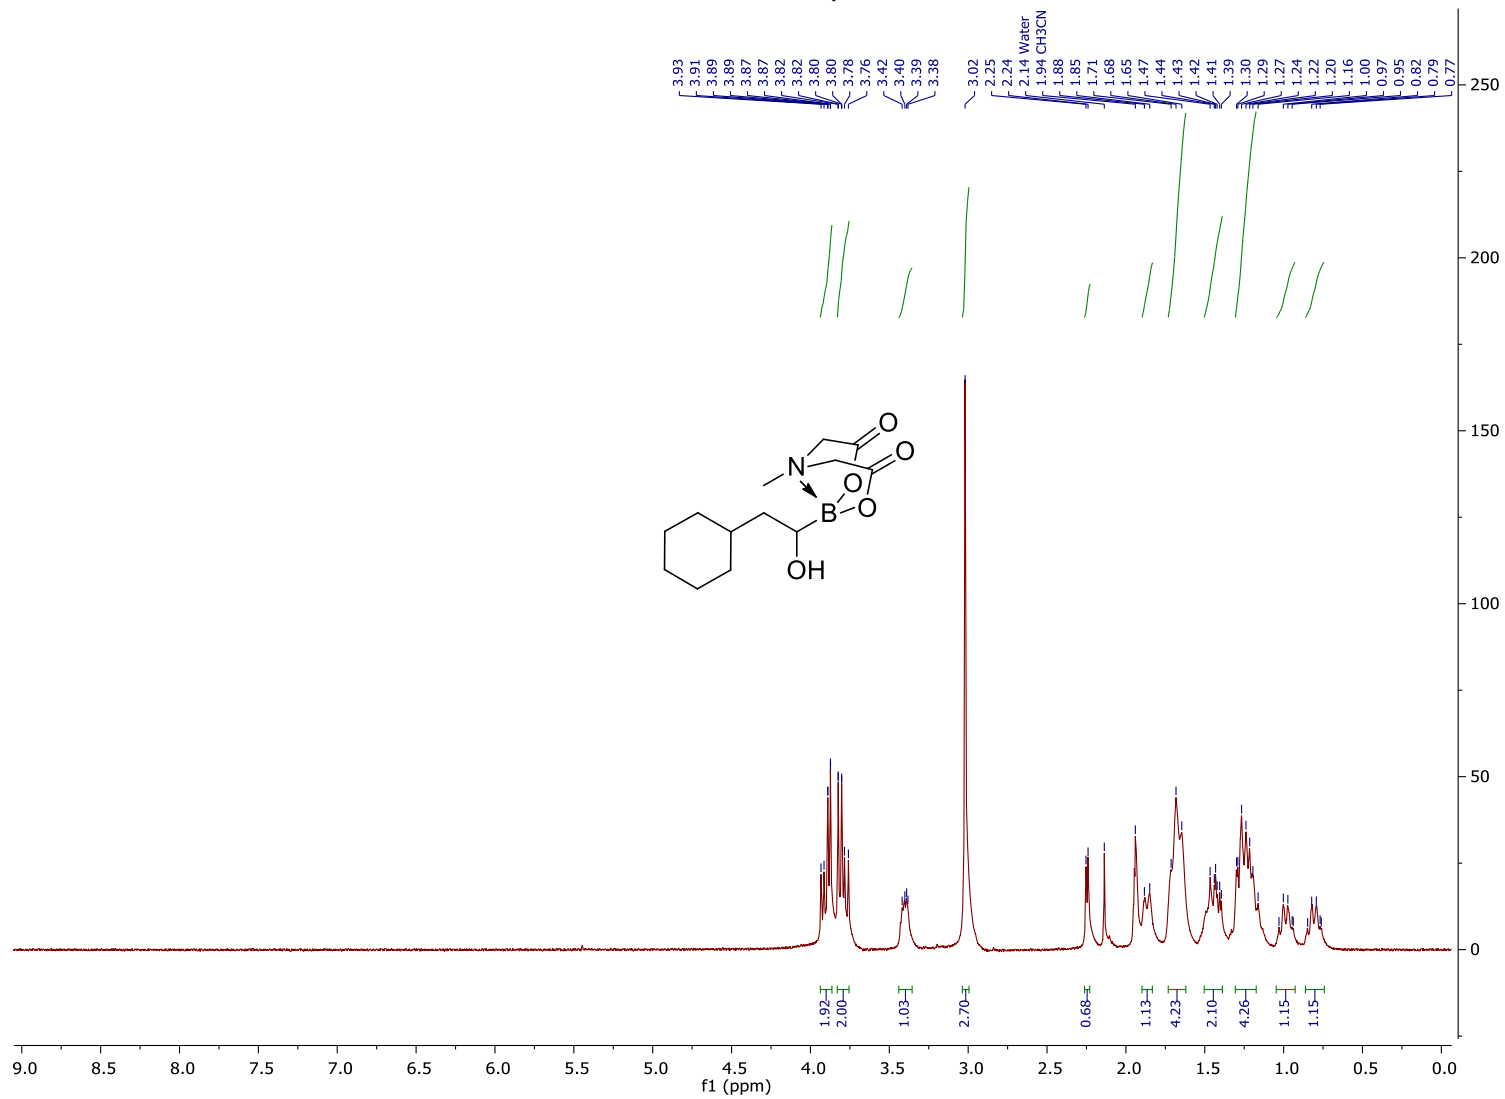

<sup>13</sup>C NMR, compound 4h

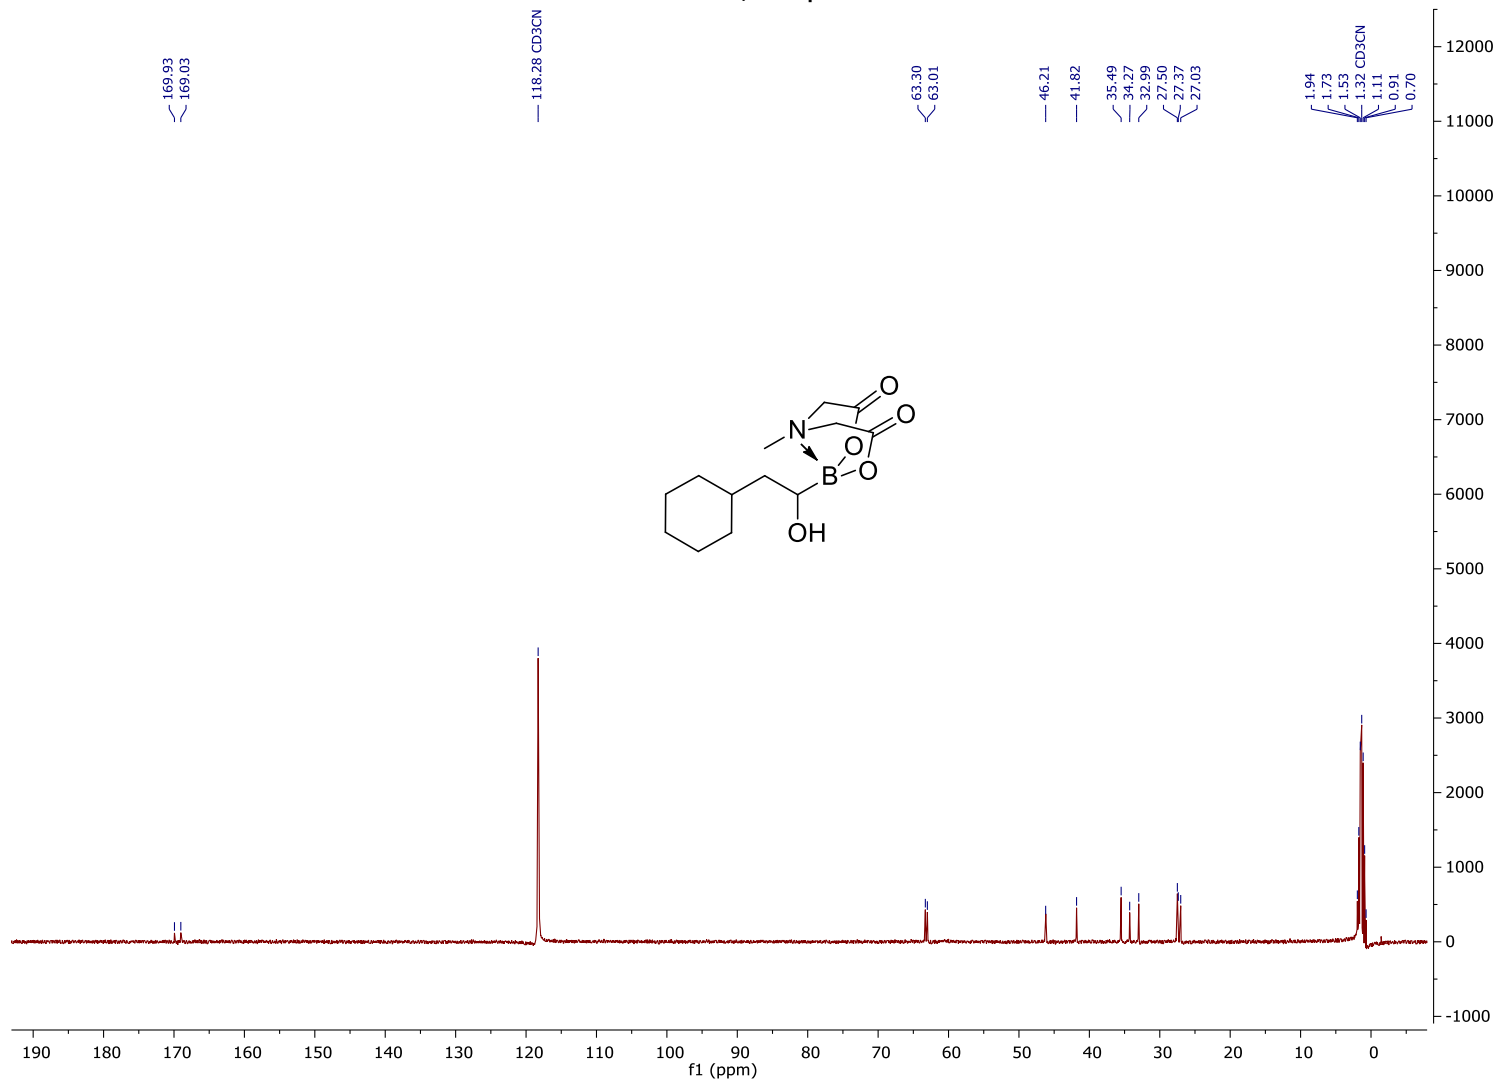

<sup>11</sup>B NMR, compound 4h

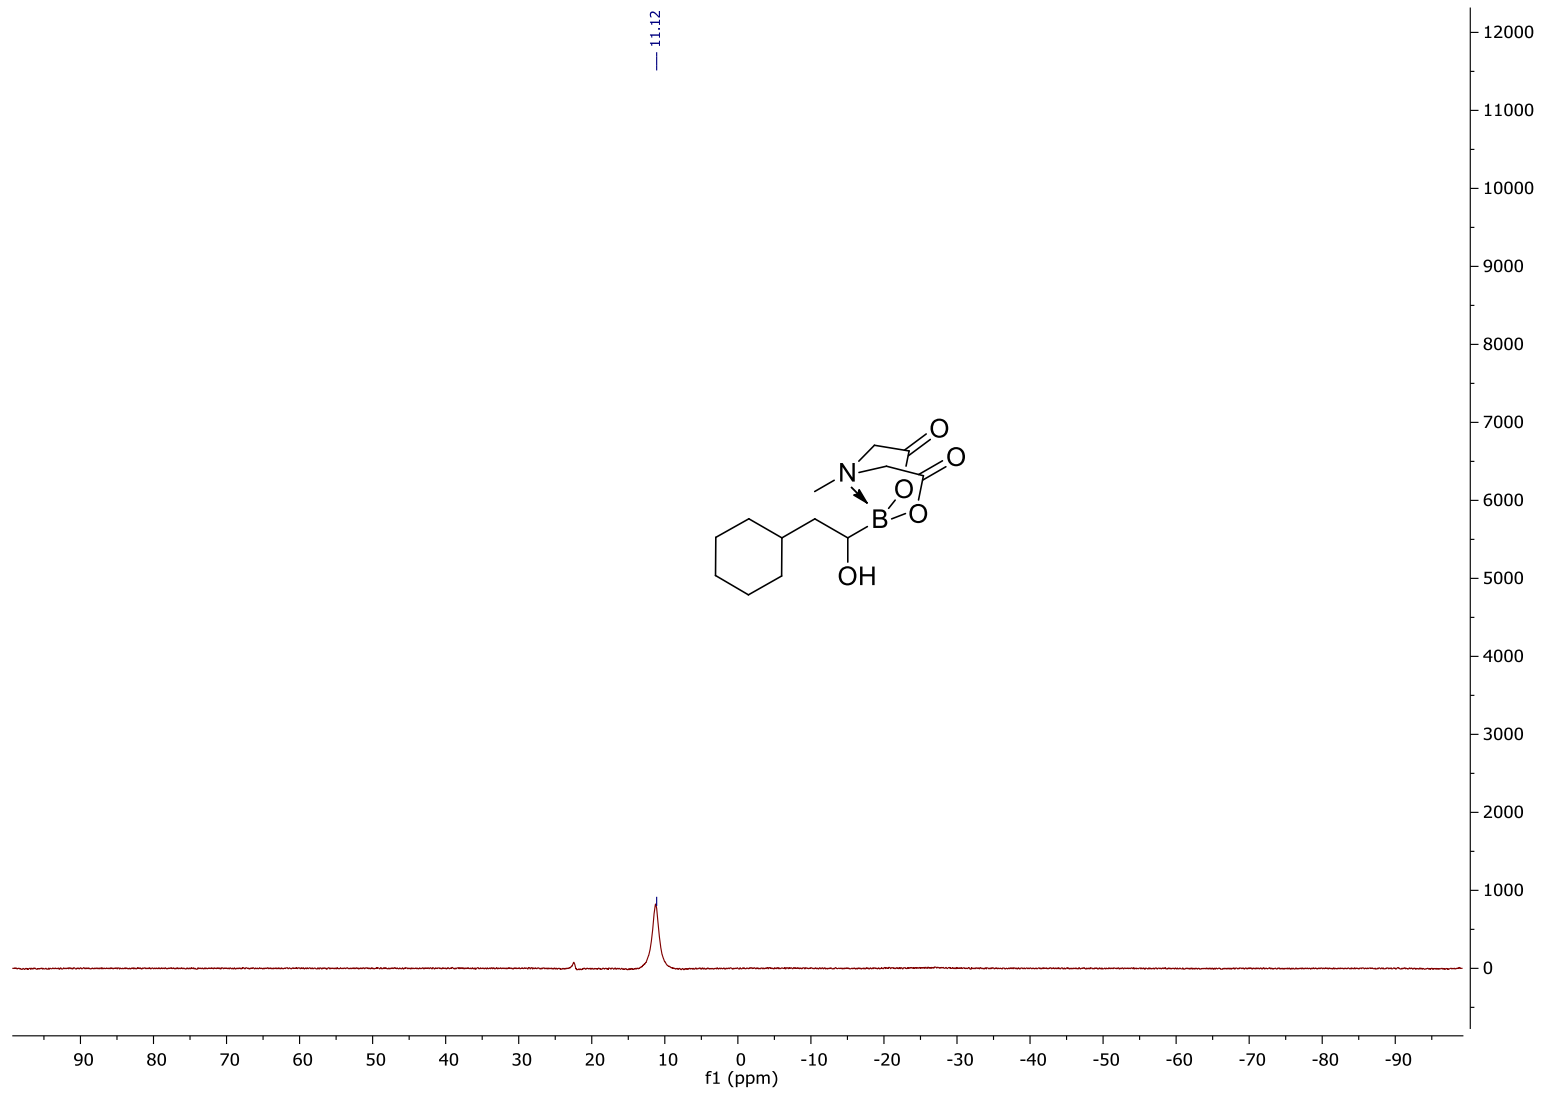

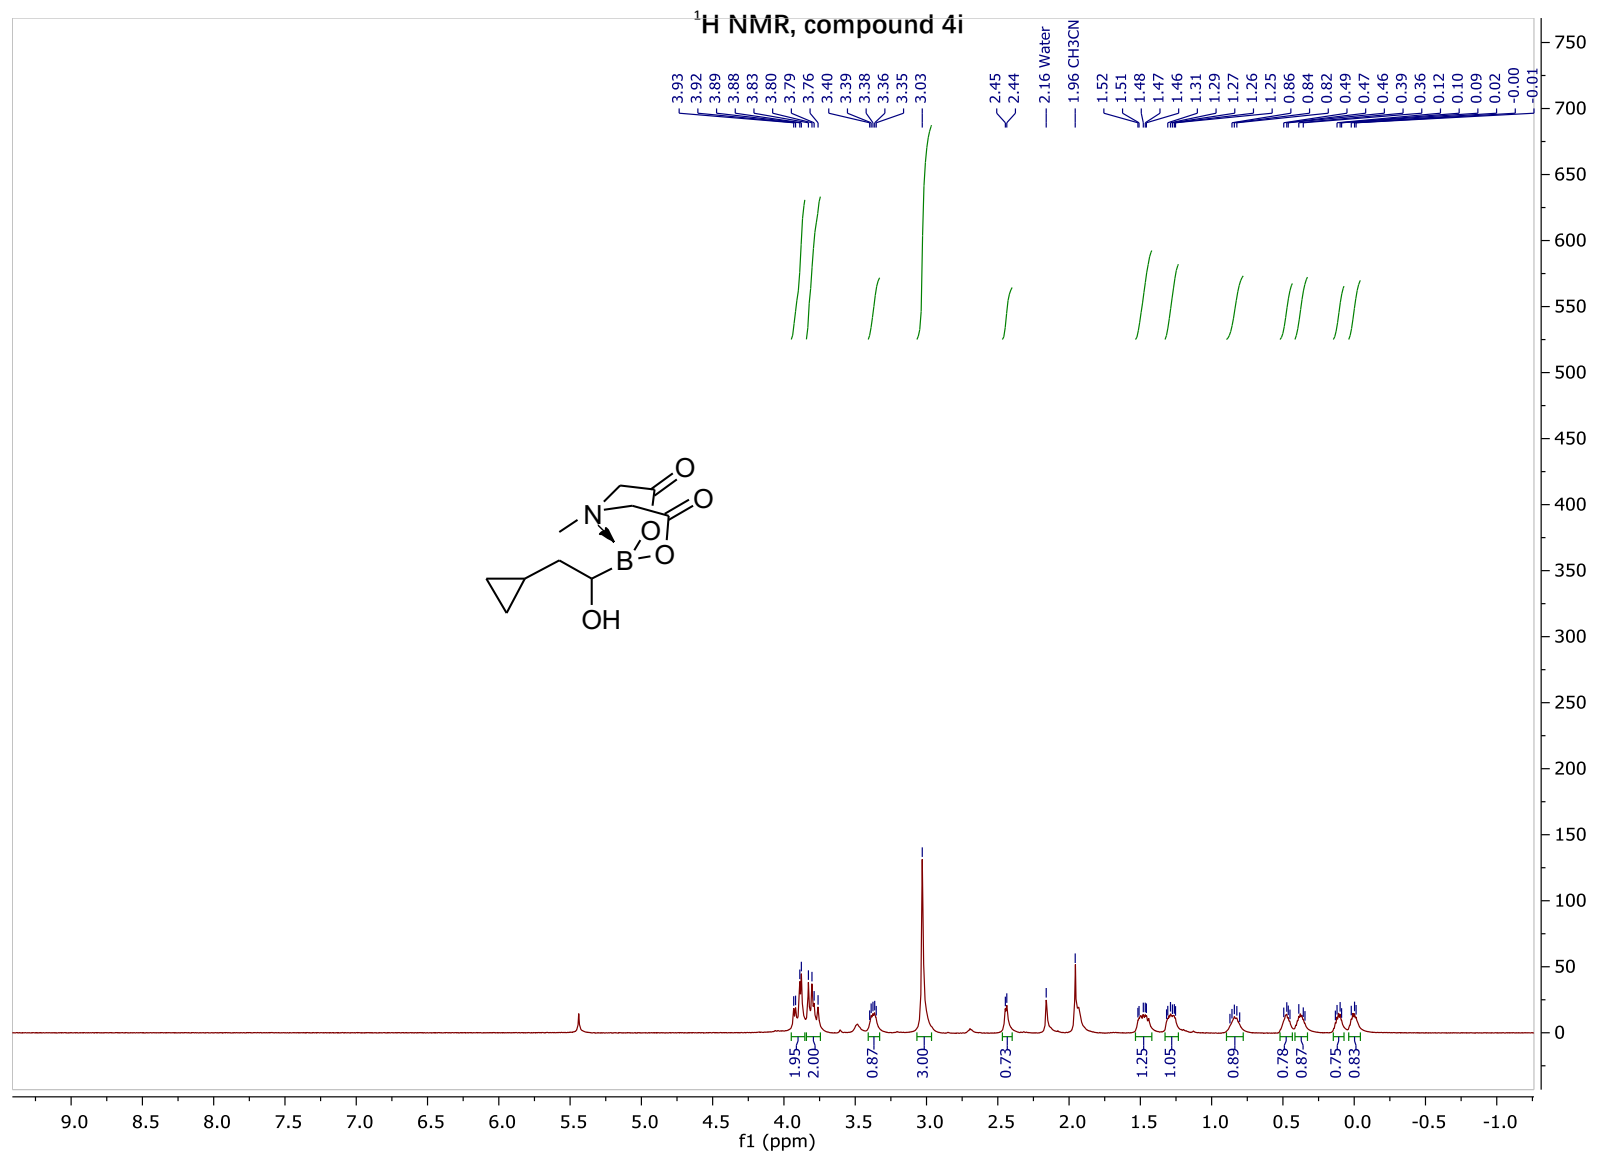

<sup>13</sup>C NMR, compound 4i

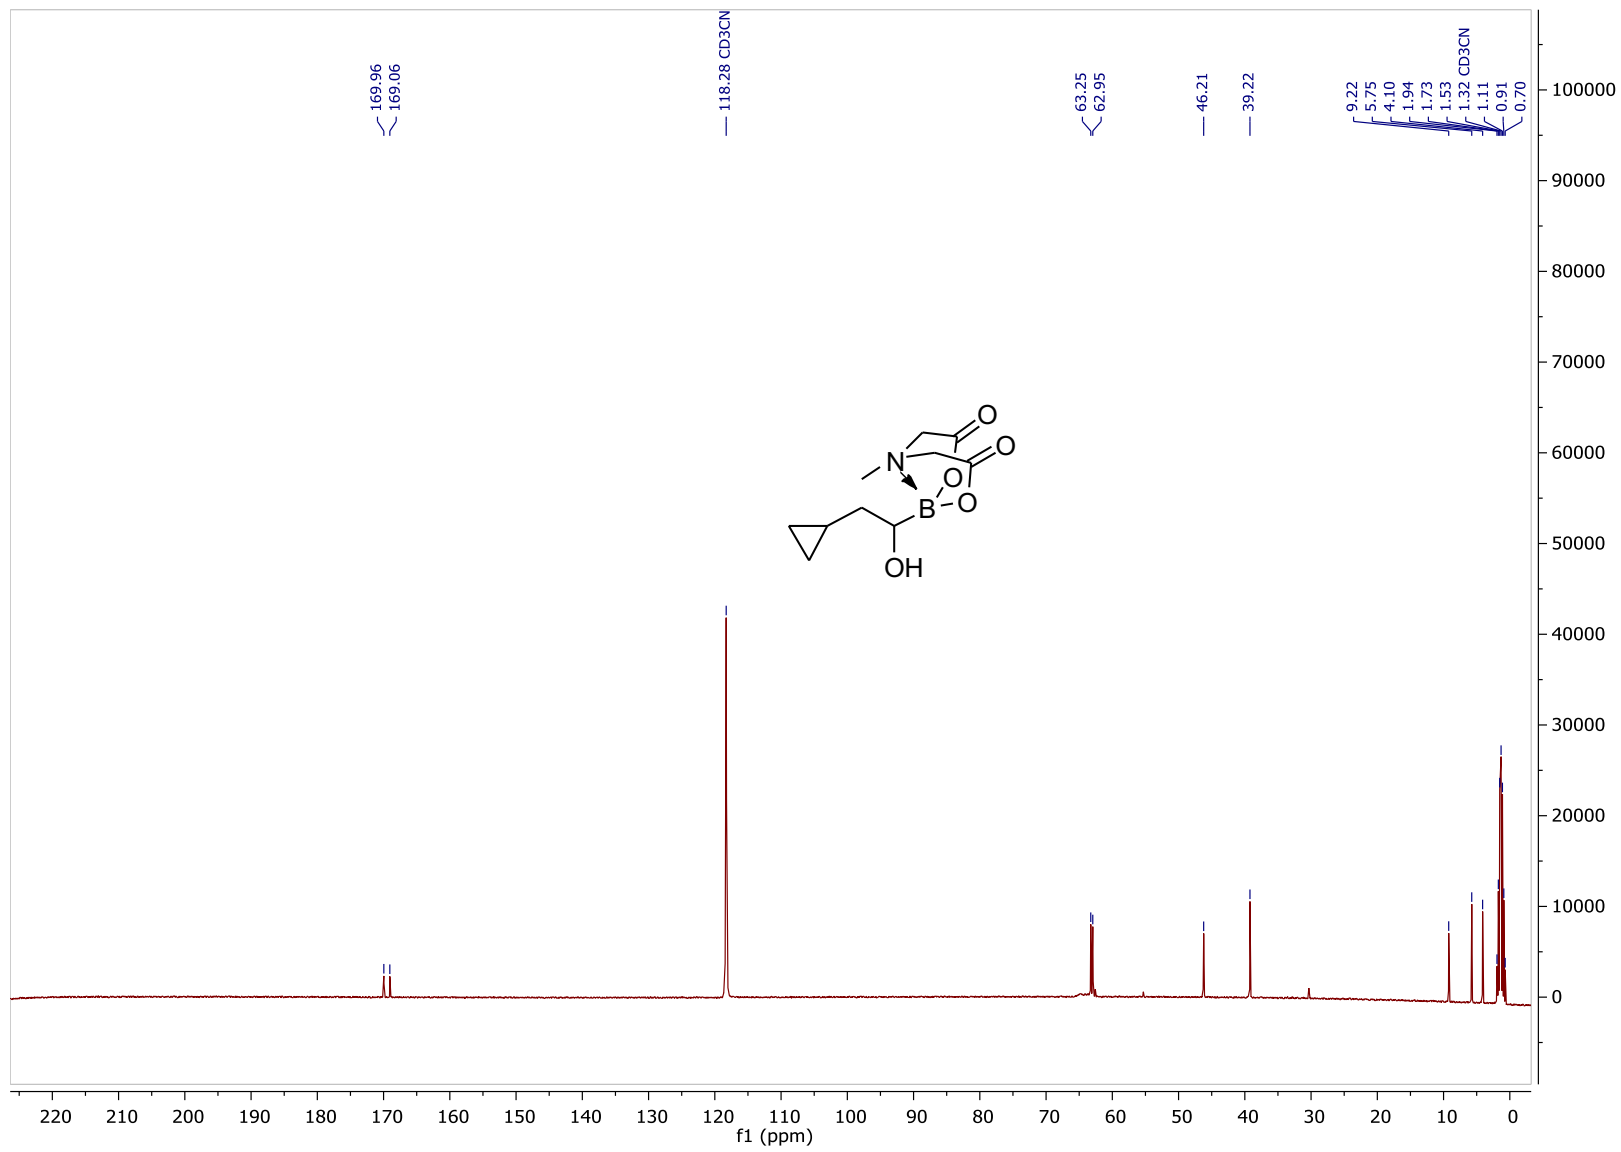

<sup>11</sup>B NMR, compound 4i

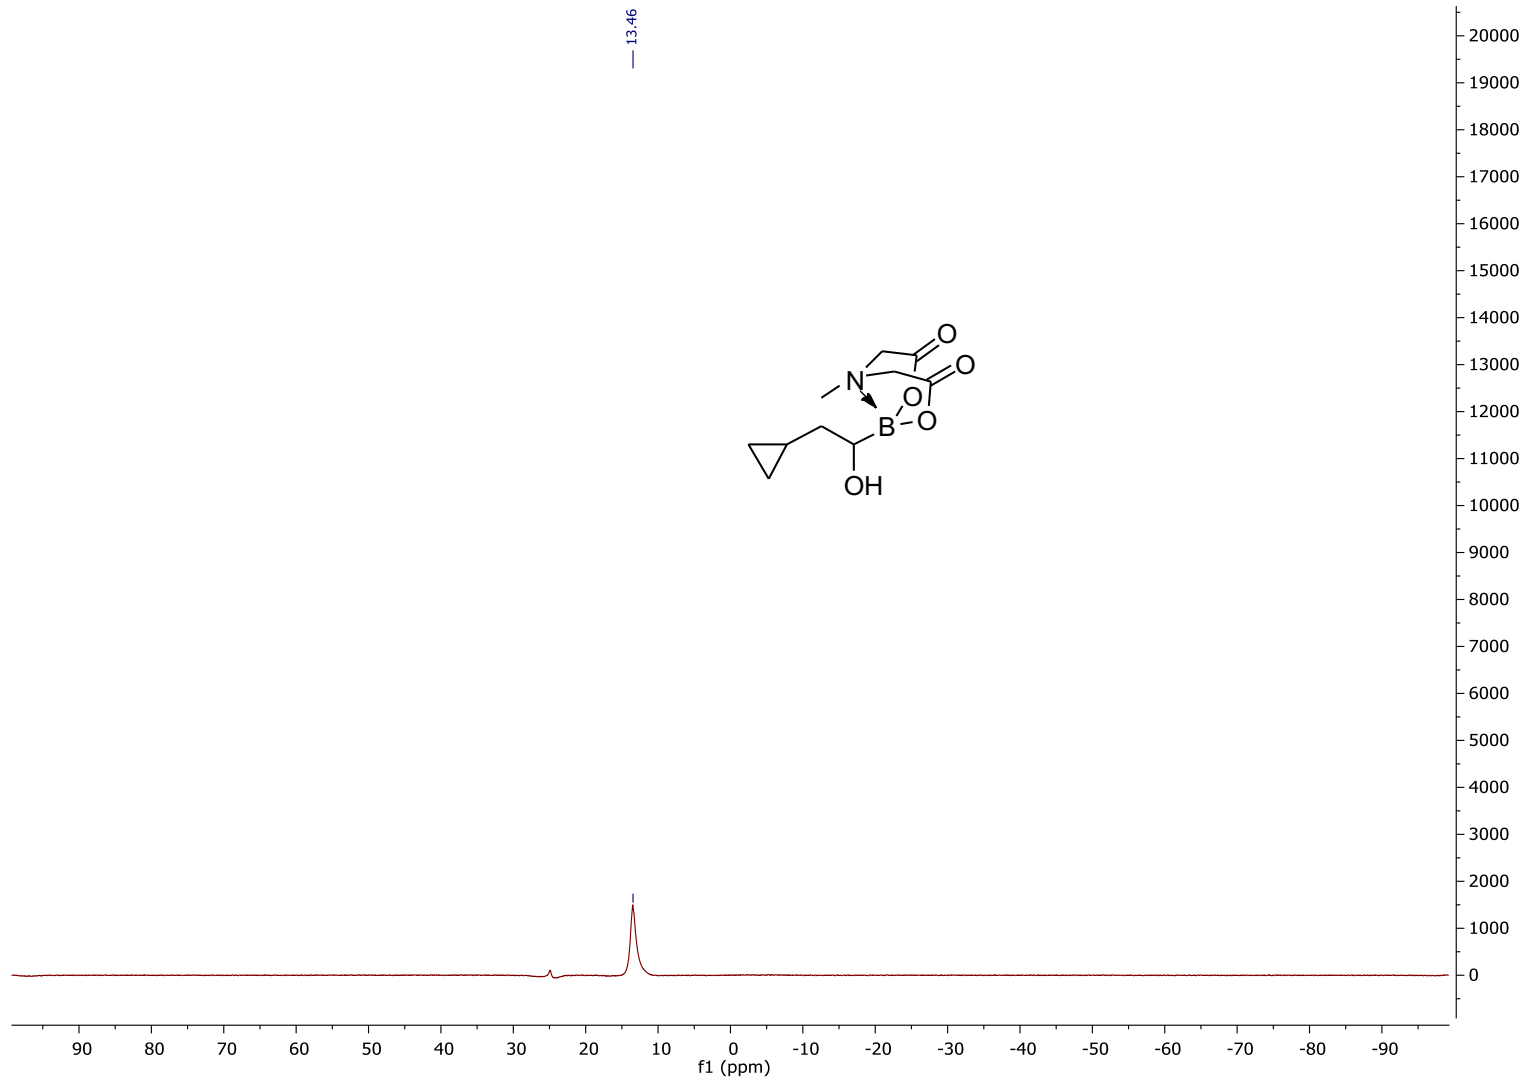

<sup>1</sup>H NMR, compound 4j

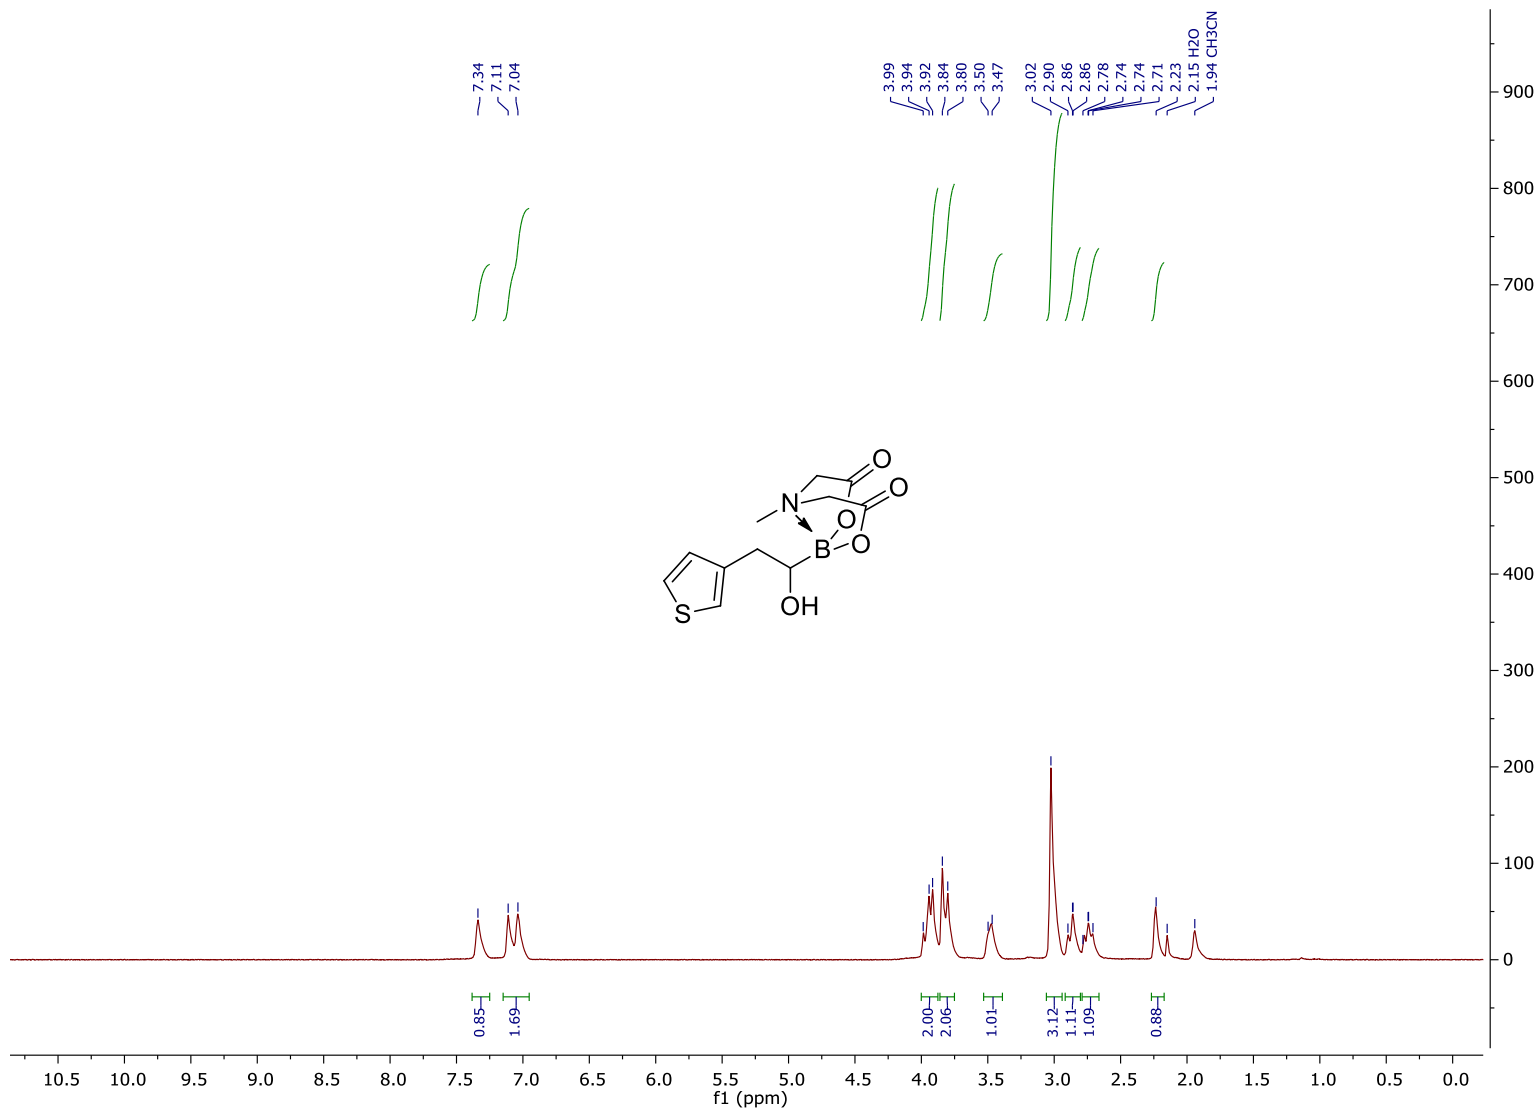



<sup>13</sup>C NMR, compound 4j

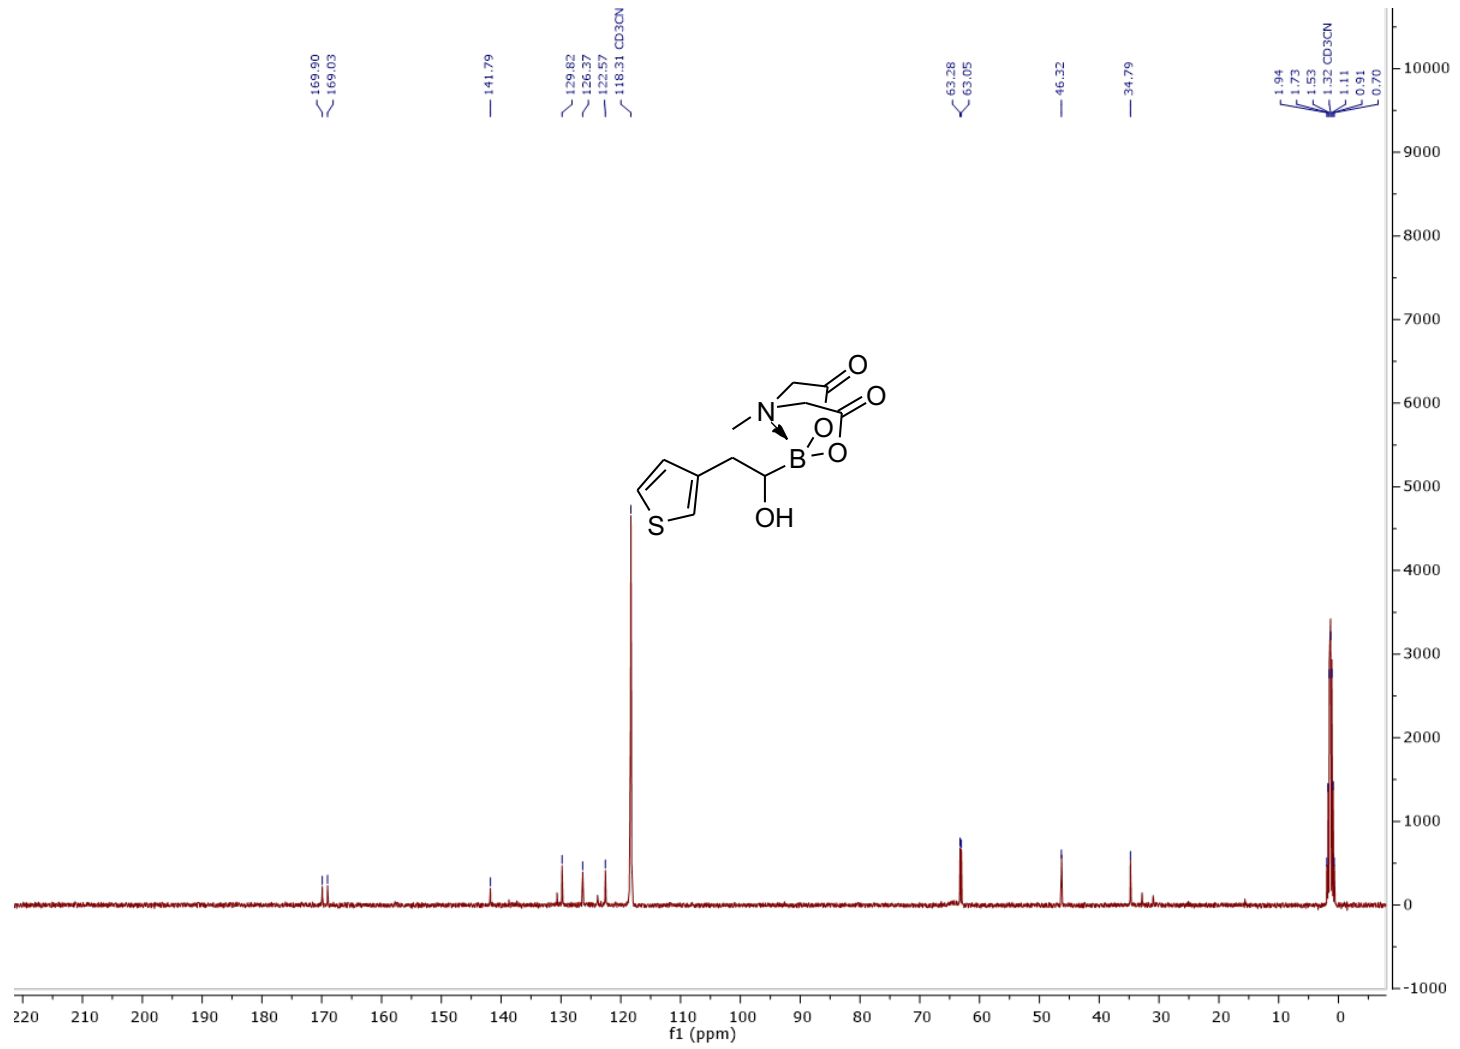

<sup>11</sup>B NMR, compound 4j

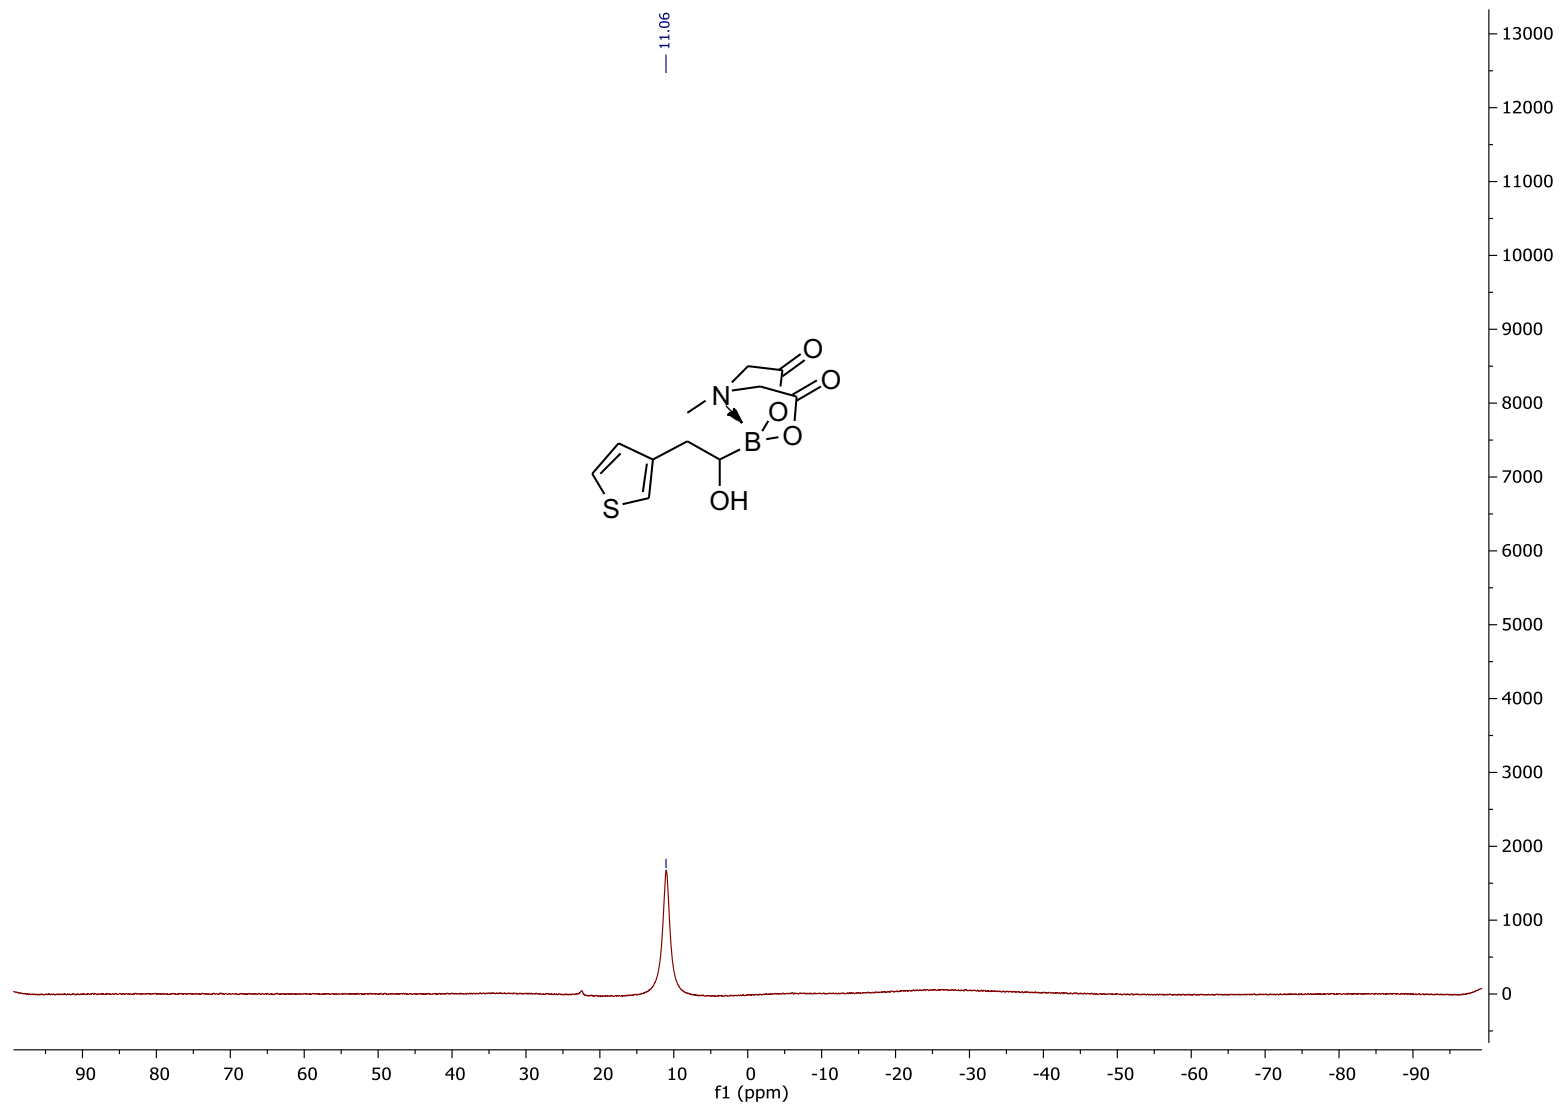

<sup>1</sup>H NMR, compound 4k

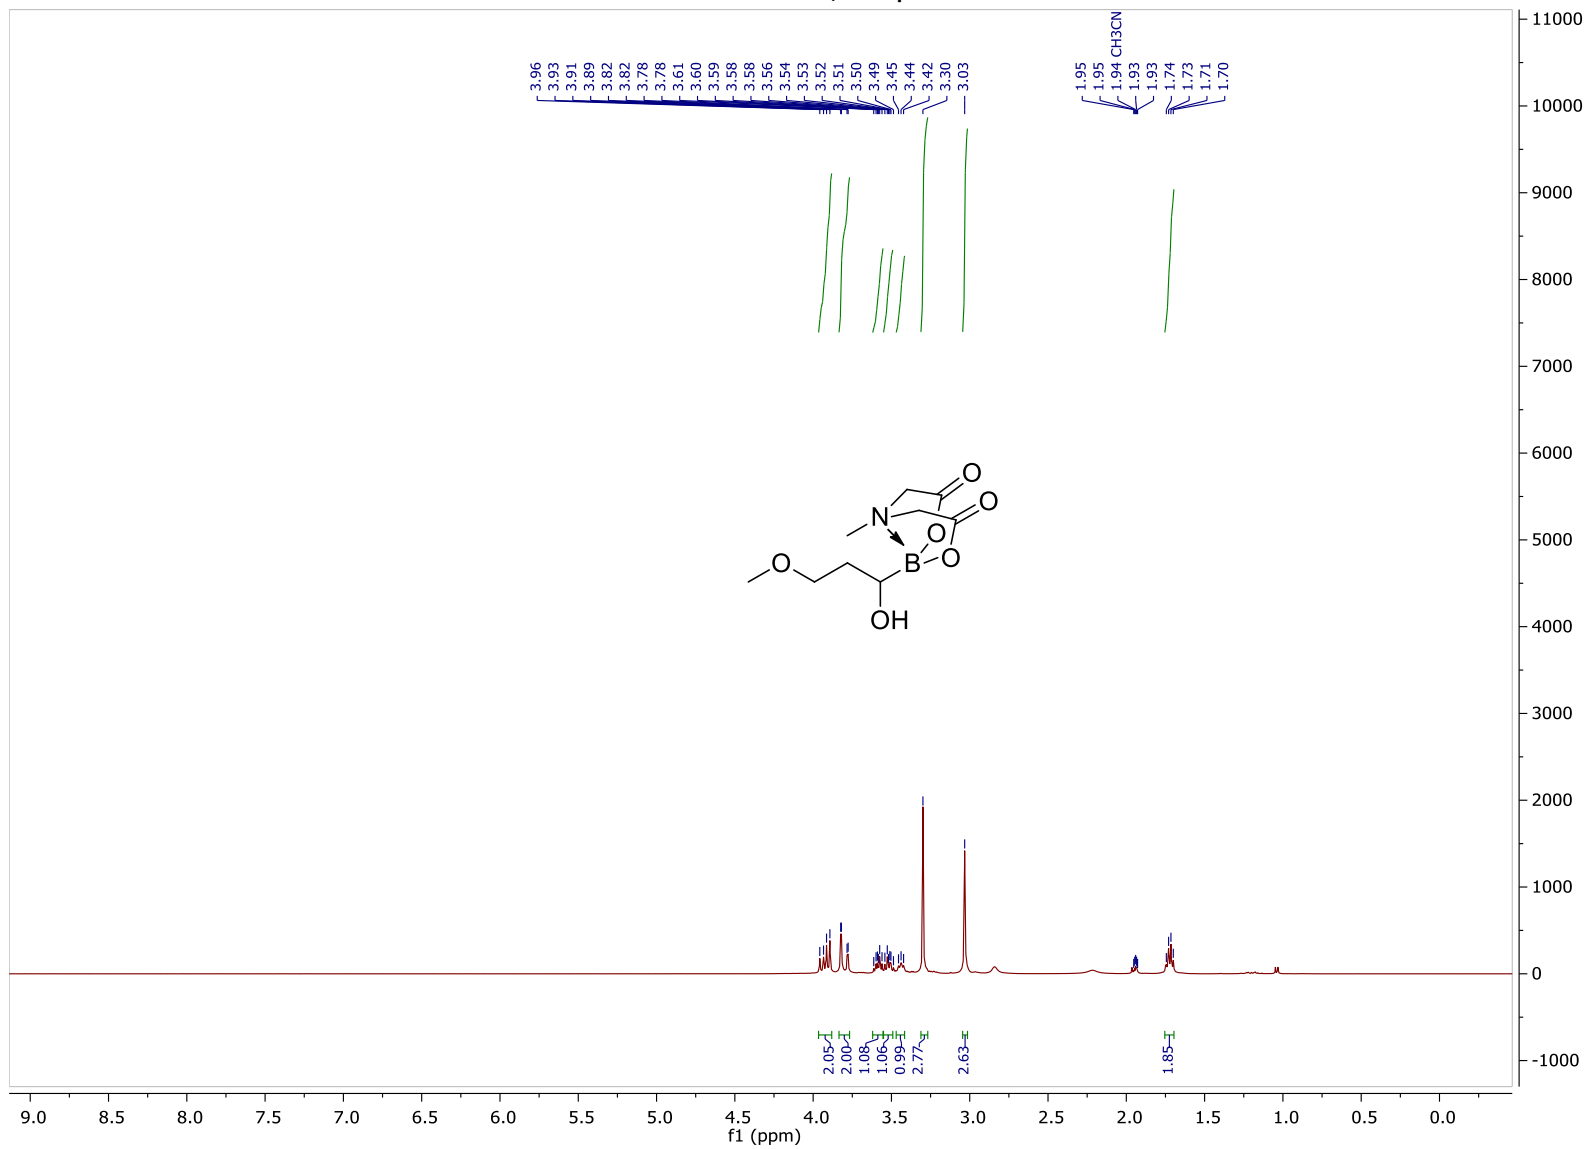

<sup>13</sup>C NMR, compound 4k

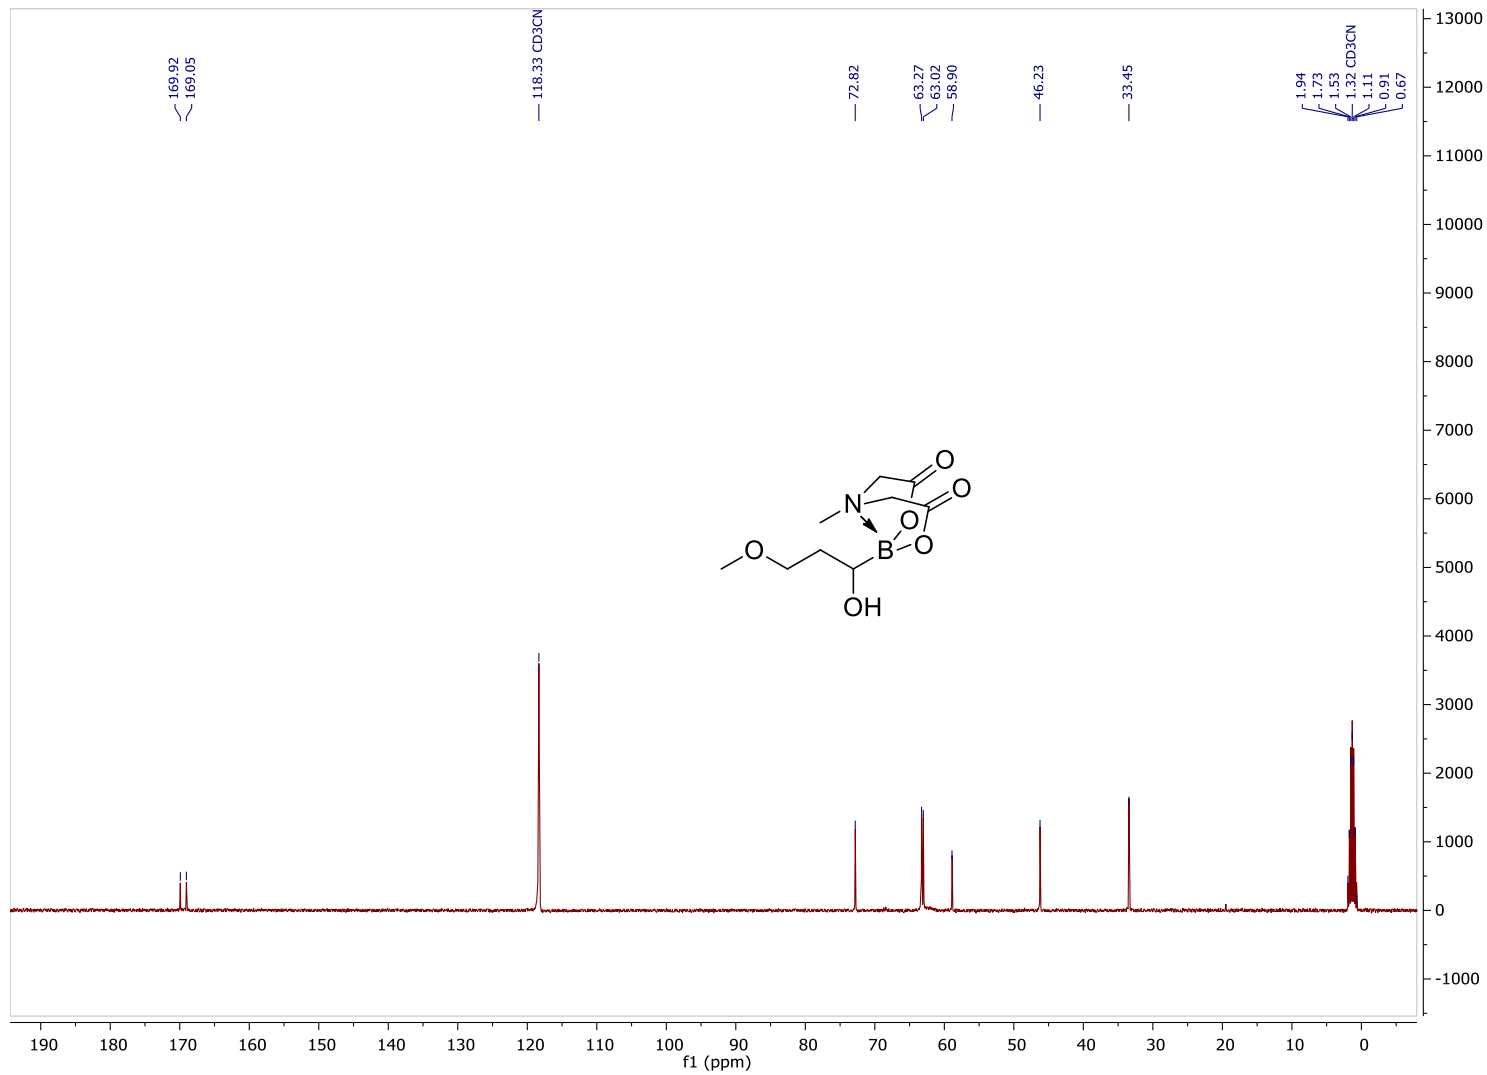

<sup>11</sup>B NMR, compound 4k

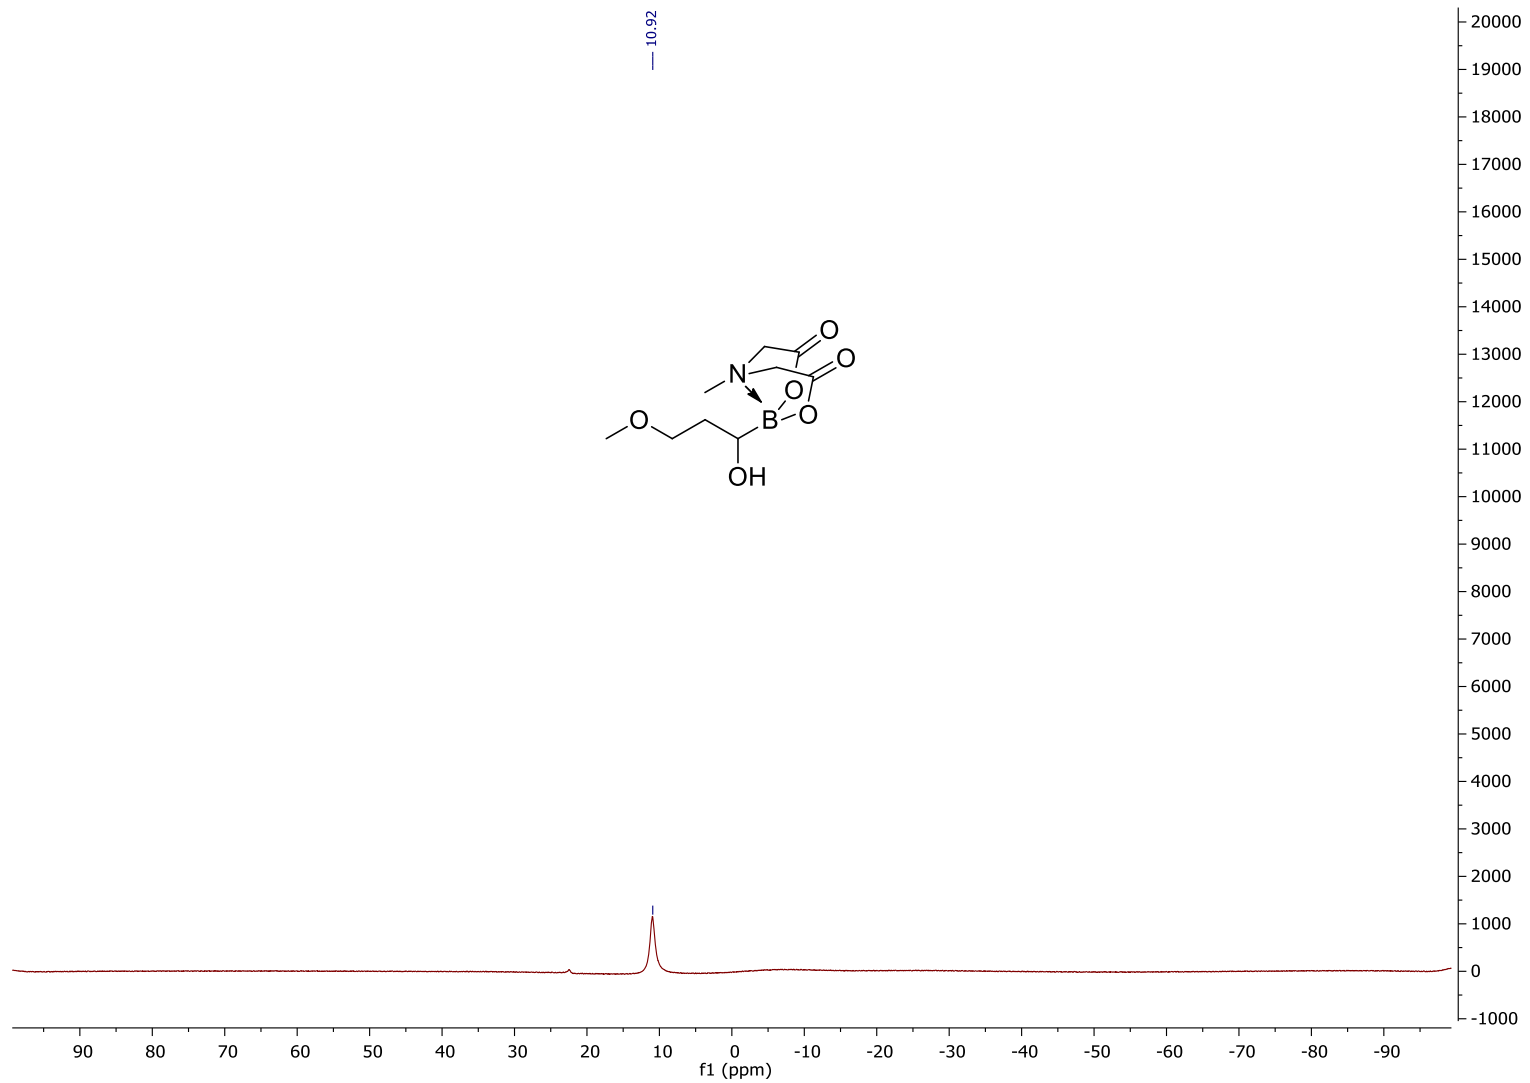

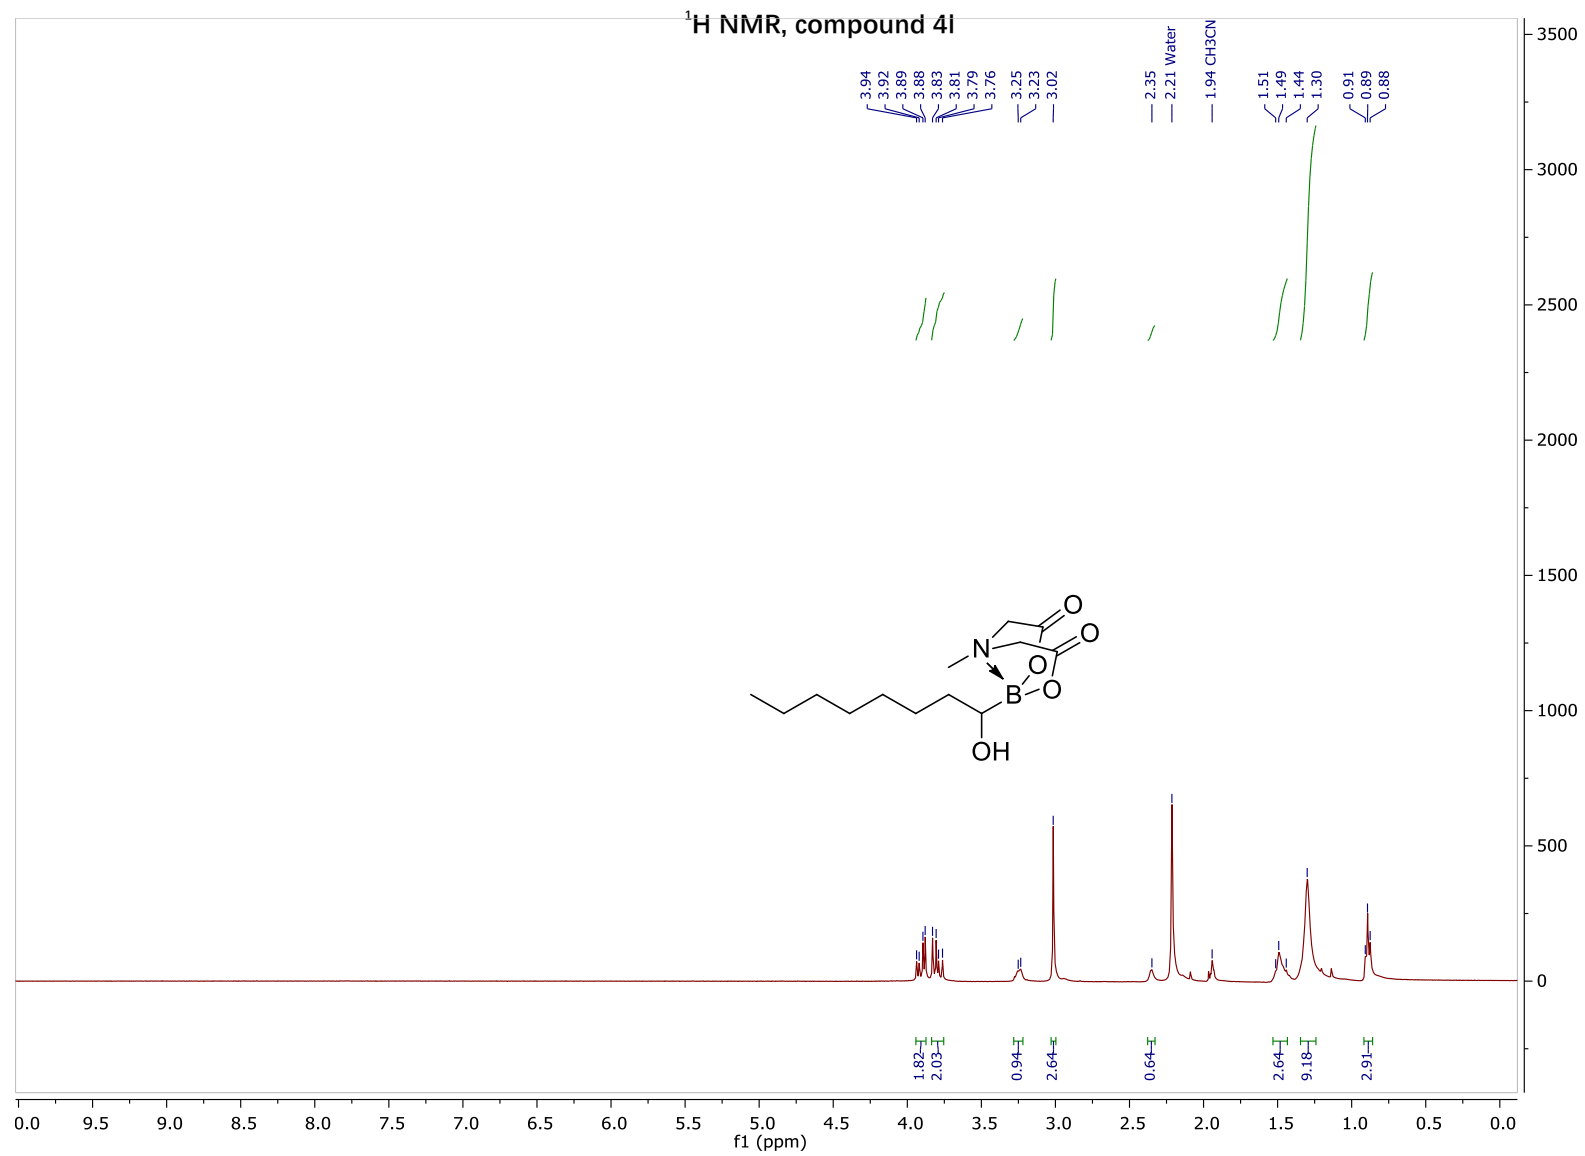

<sup>13</sup>C NMR, compound 4I

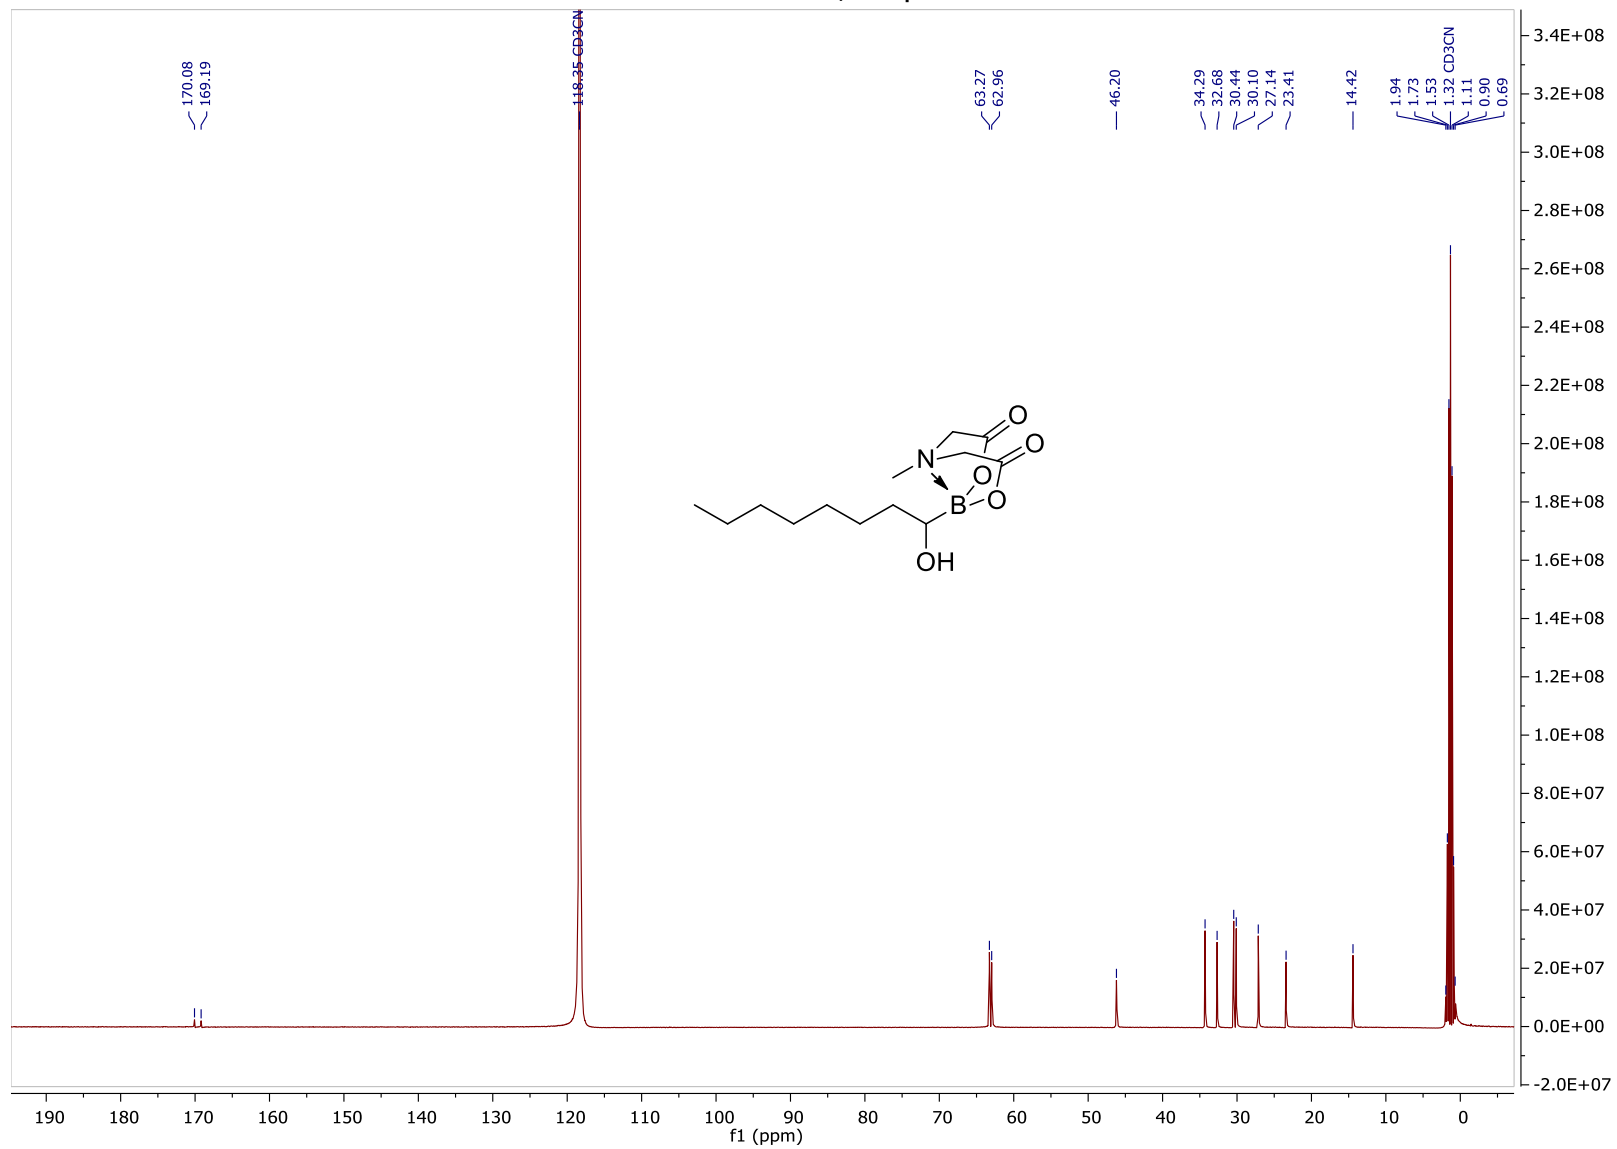

<sup>11</sup>B NMR, compound 4I

11.19

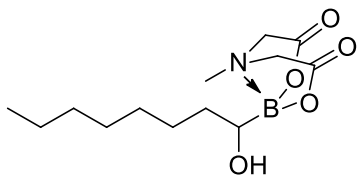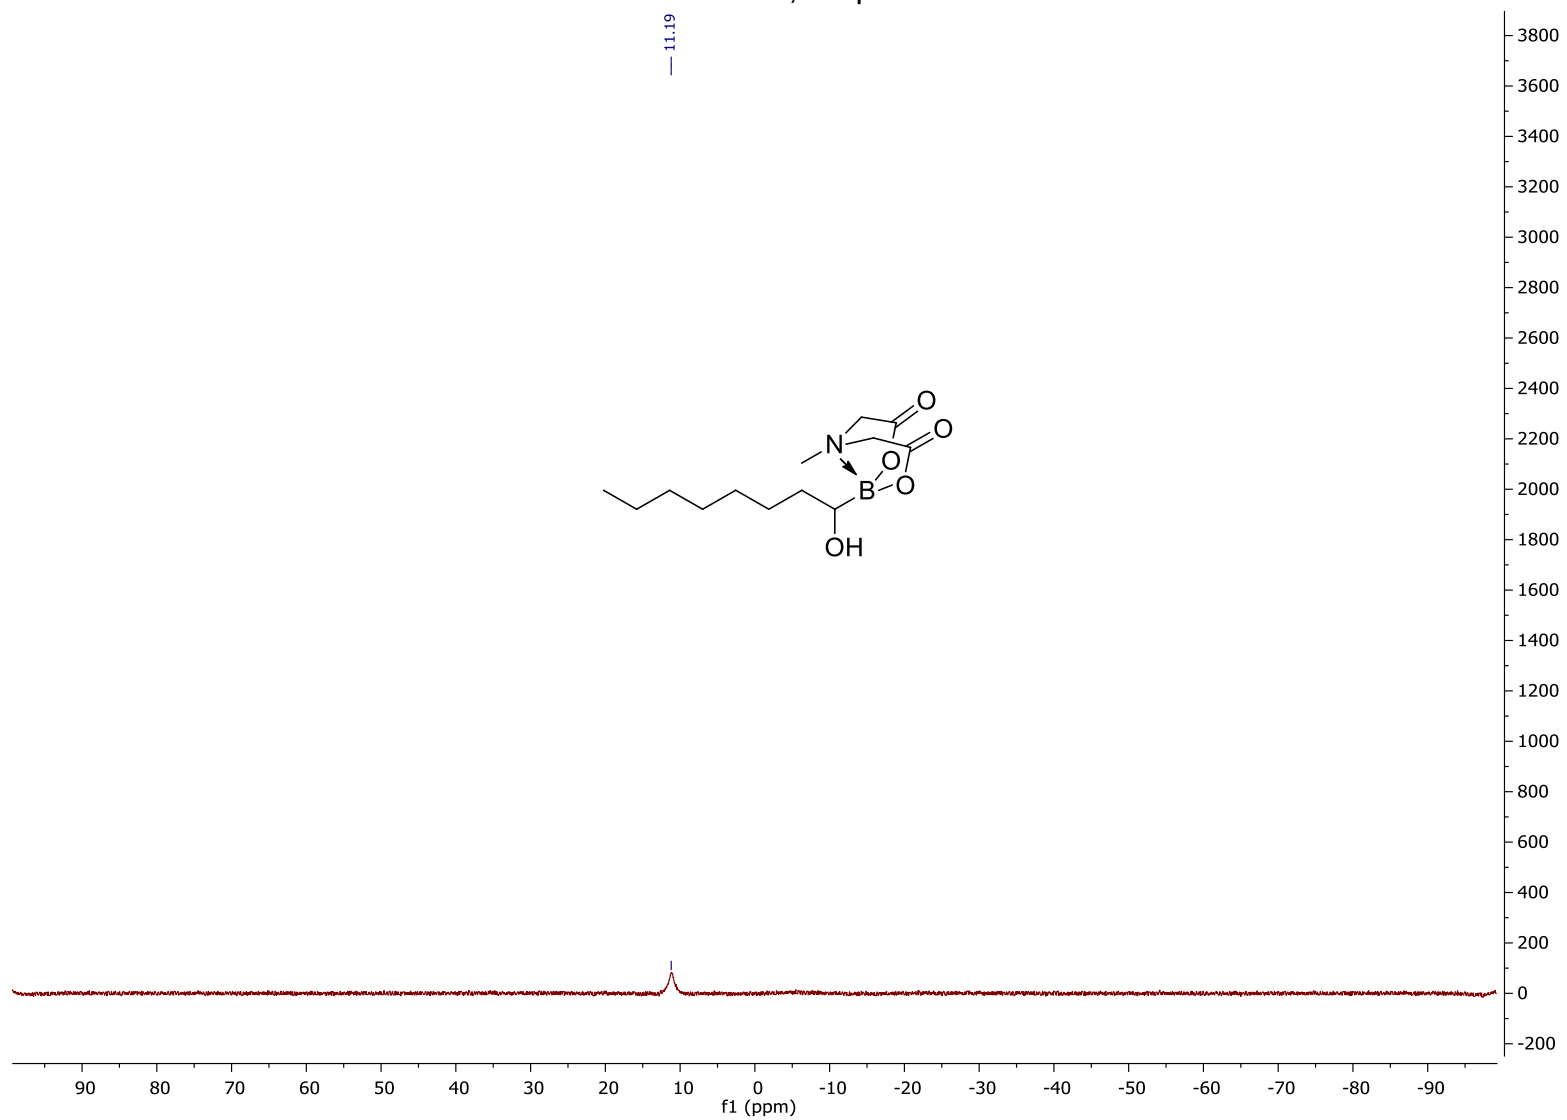



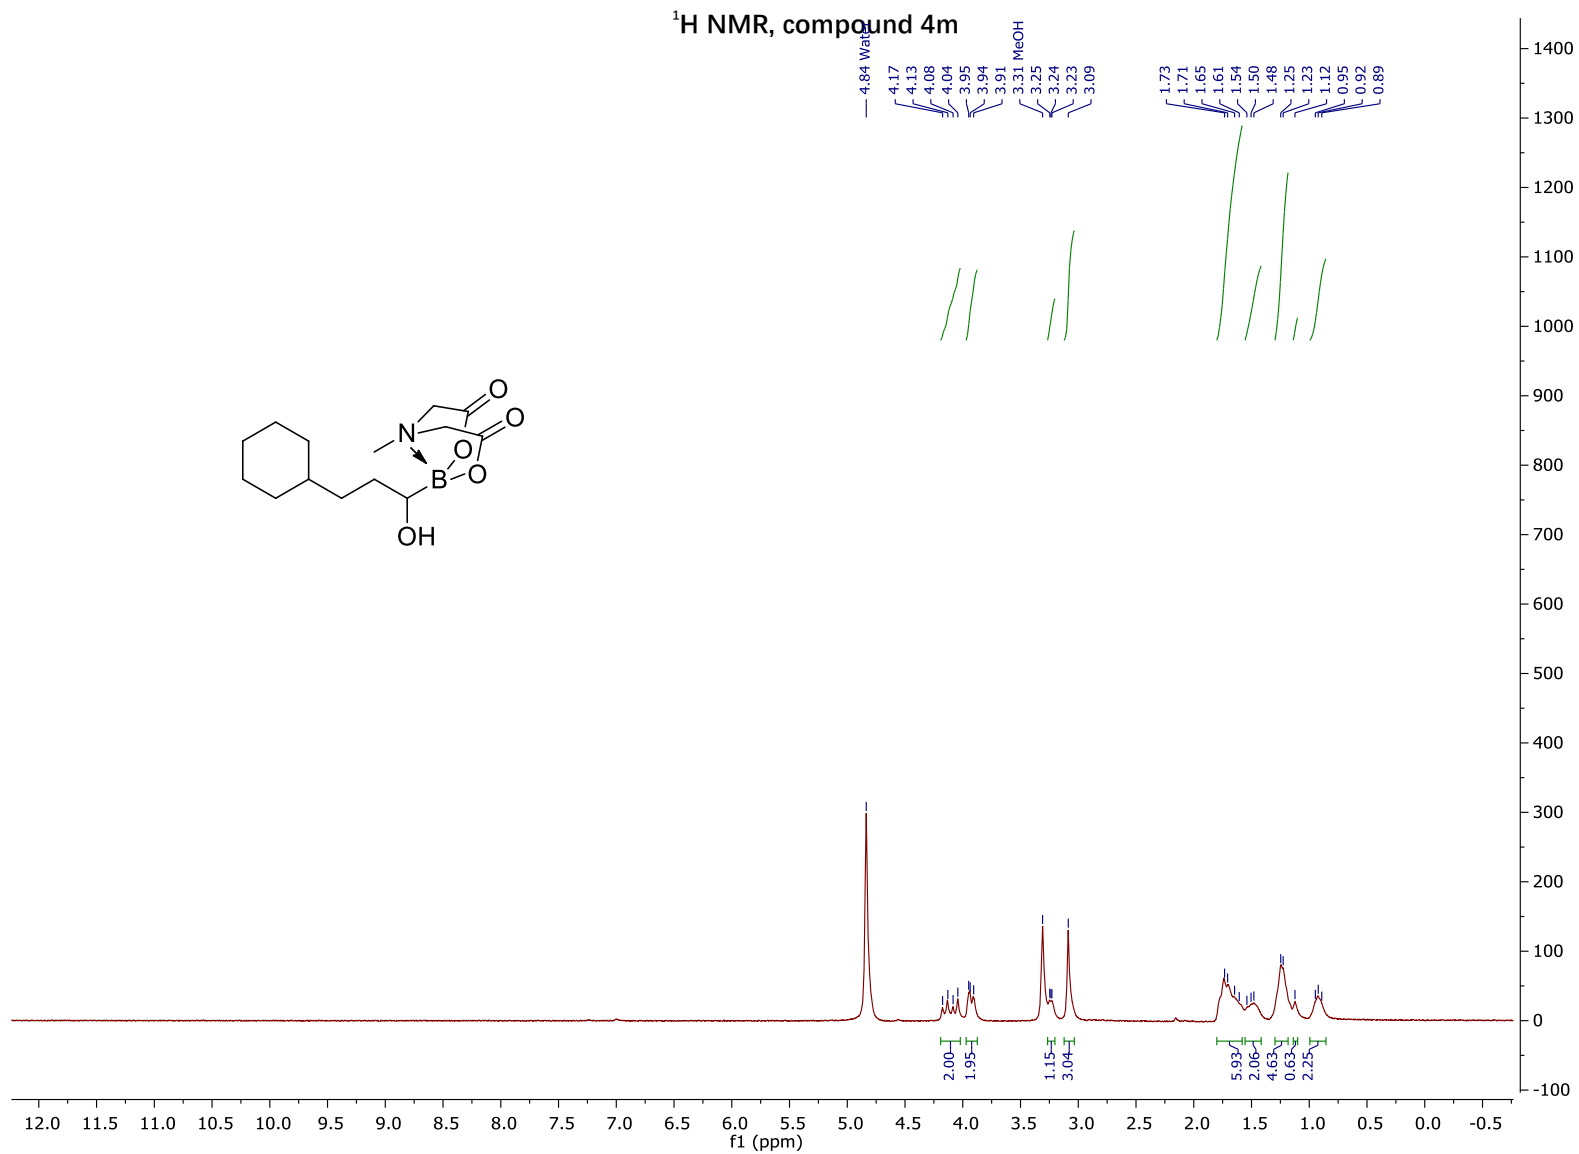

<sup>13</sup>C NMR, compound 4m

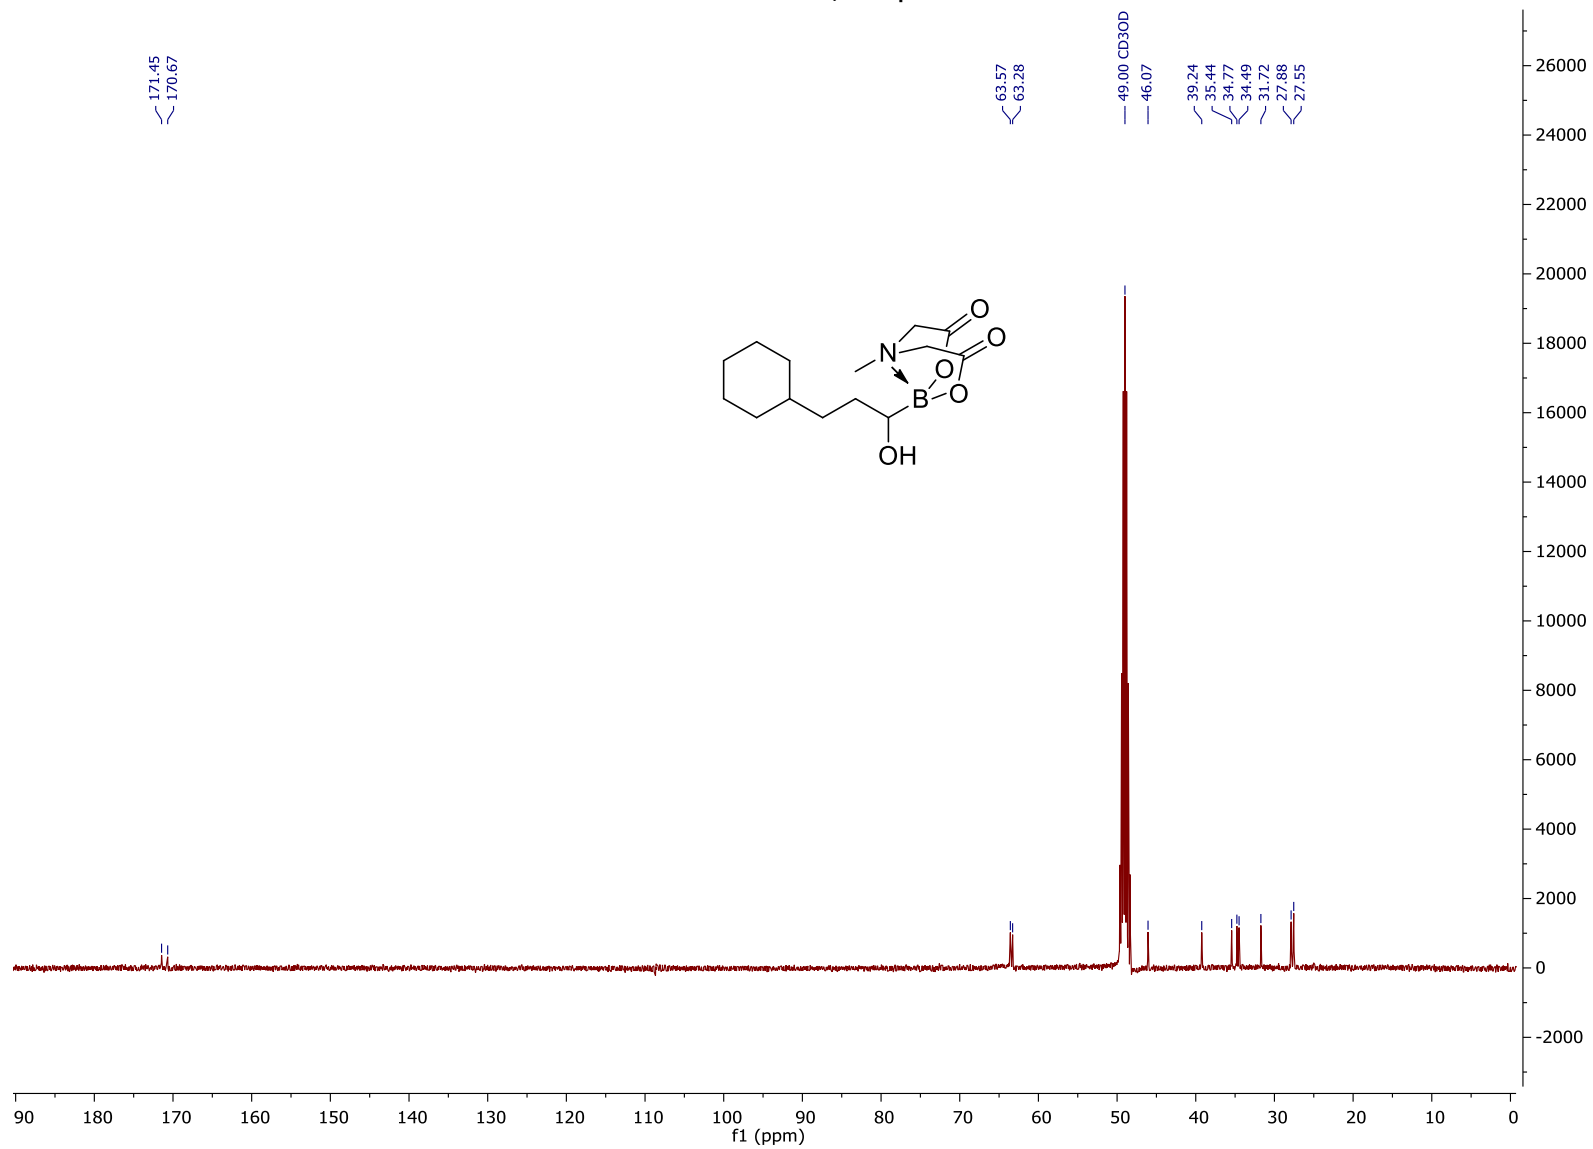

<sup>11</sup>B NMR, compound 4m

11.14

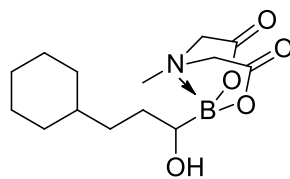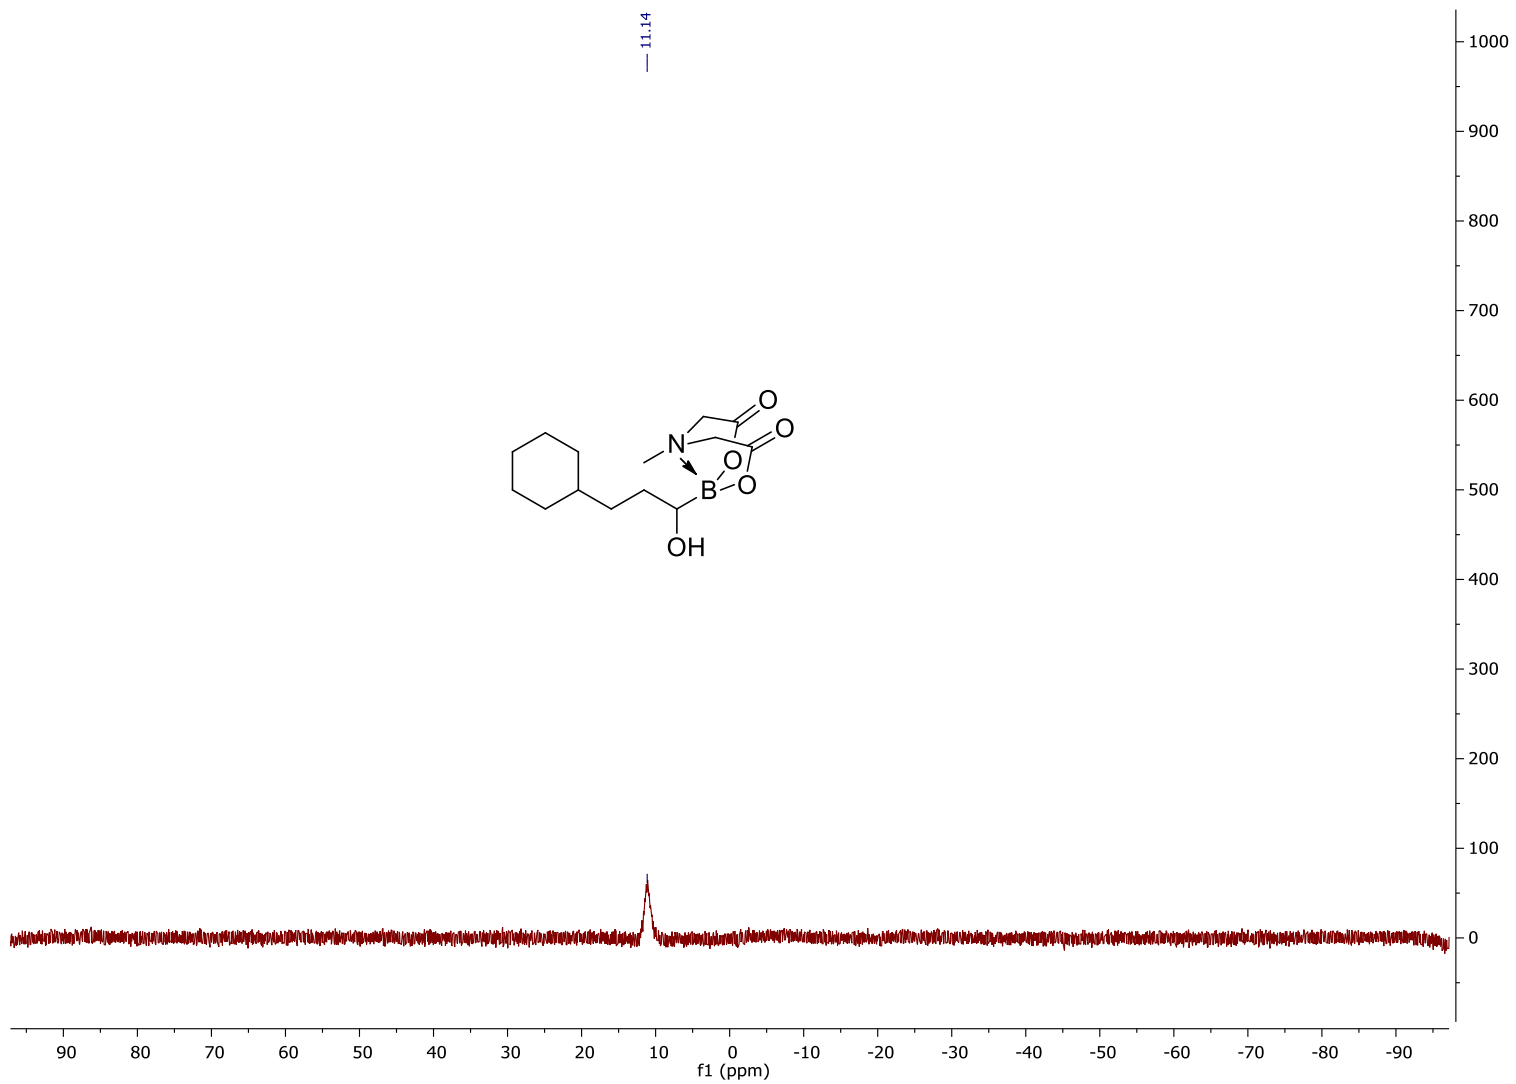

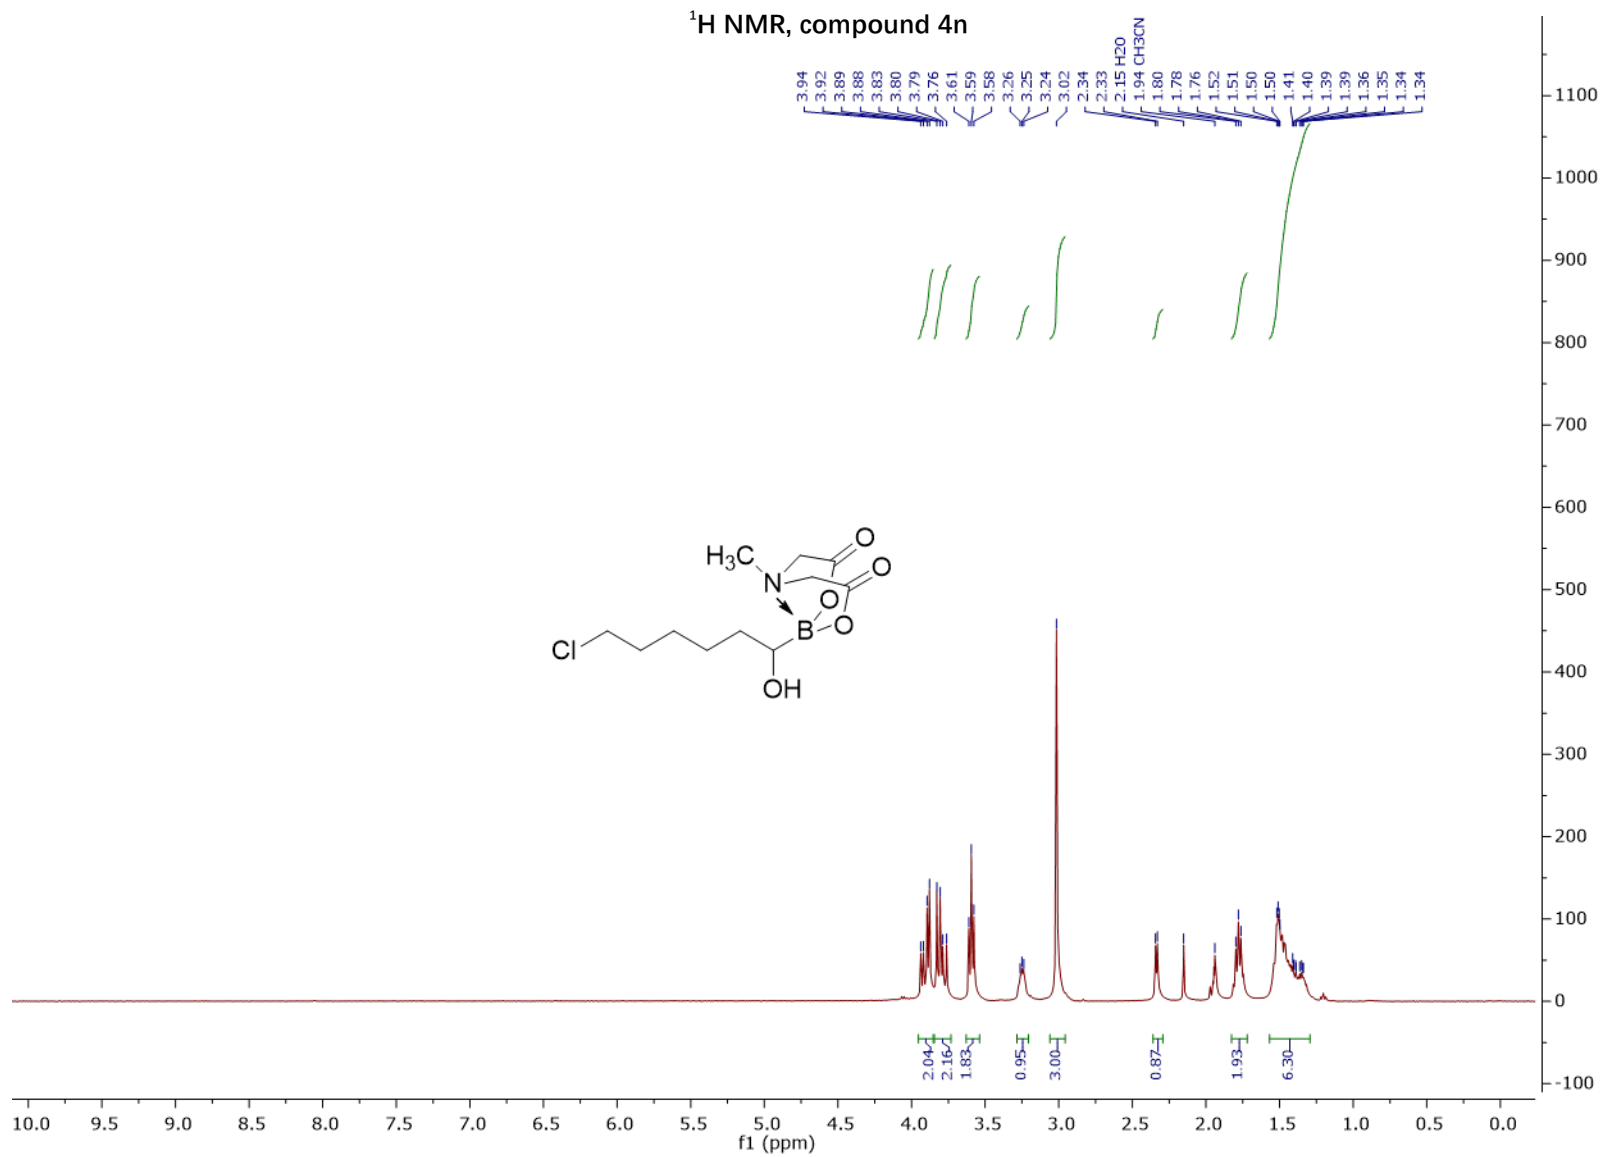

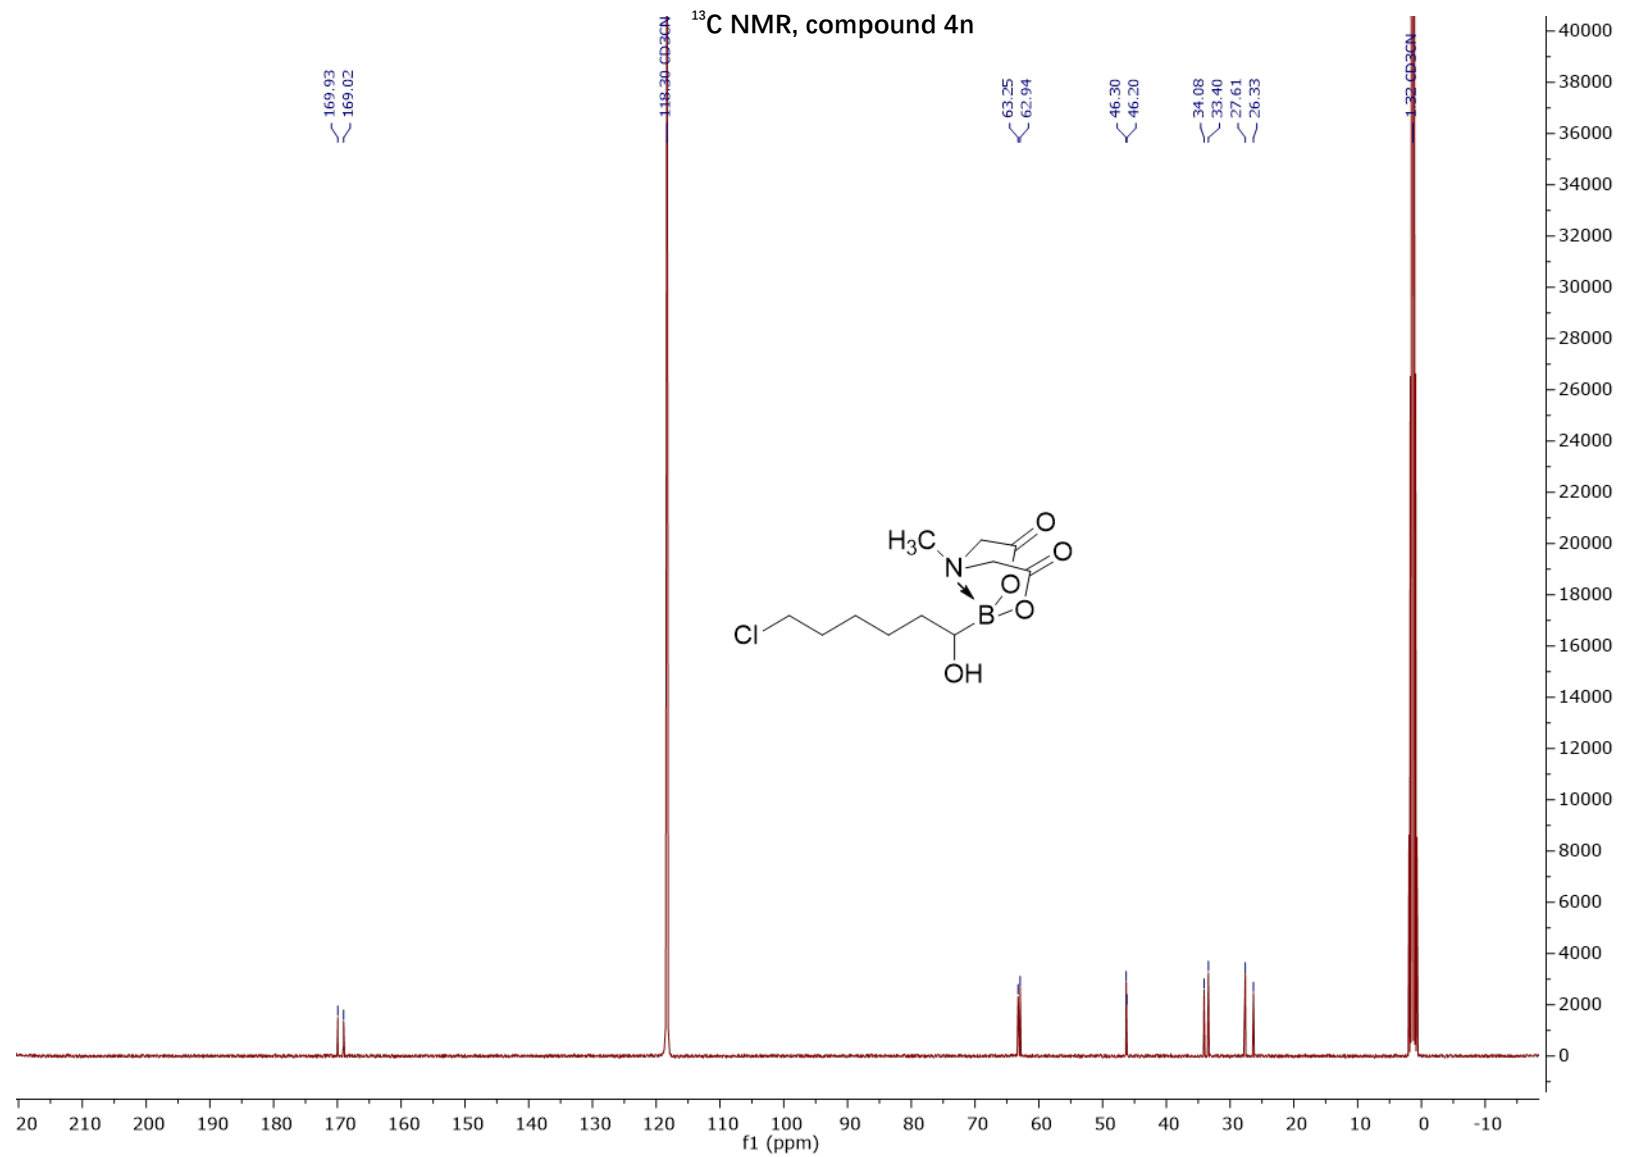

$^{11}\text{B}$  NMR, compound 4n

11.31

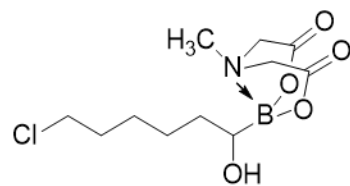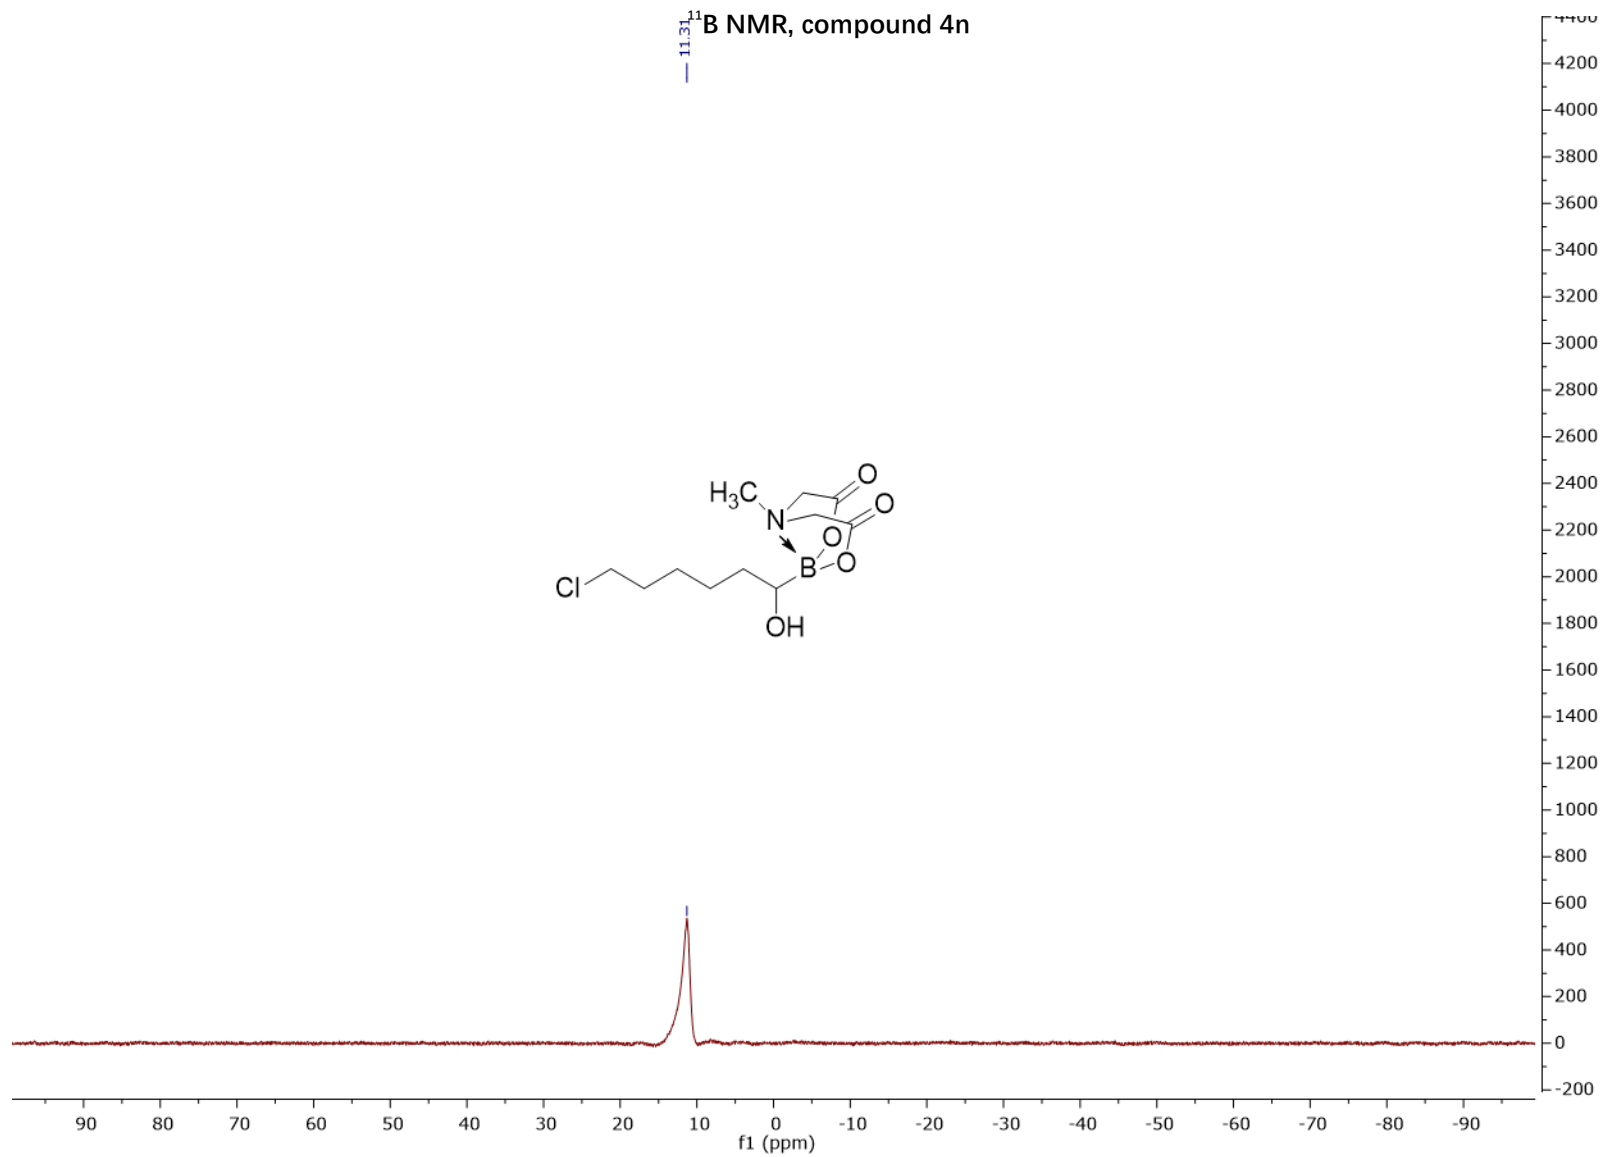

<sup>1</sup>H NMR, compound 4o

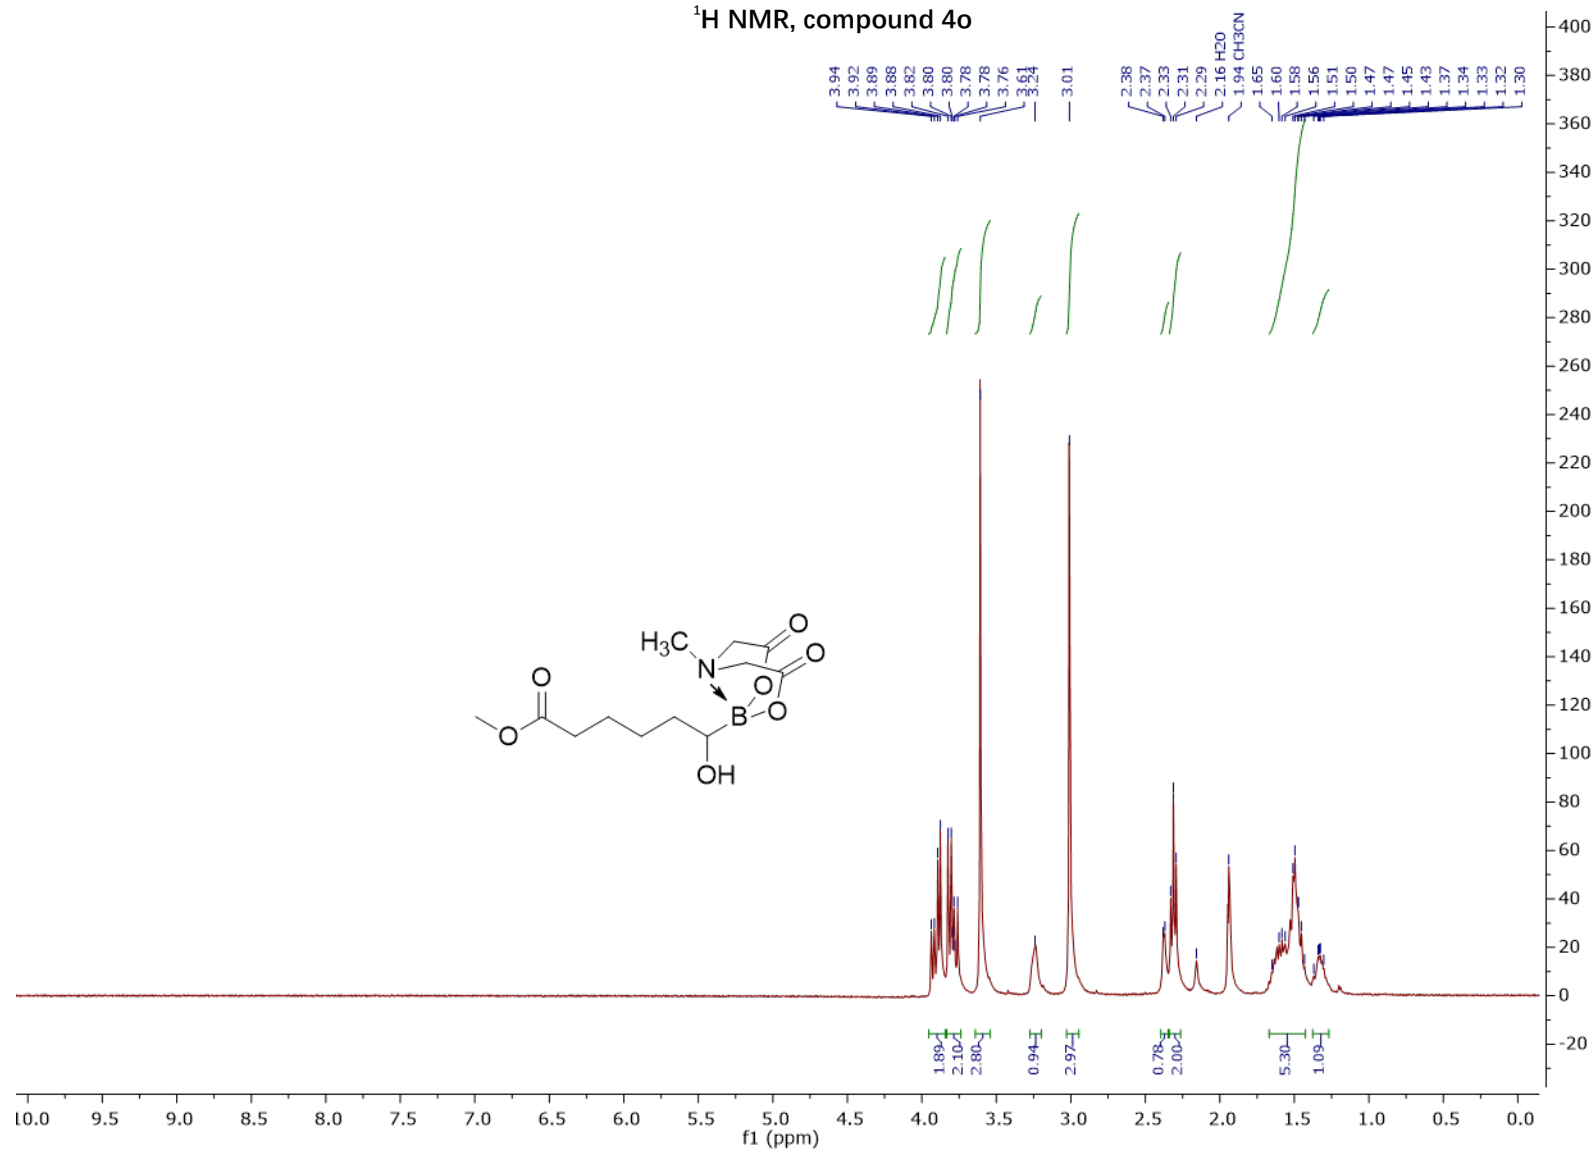

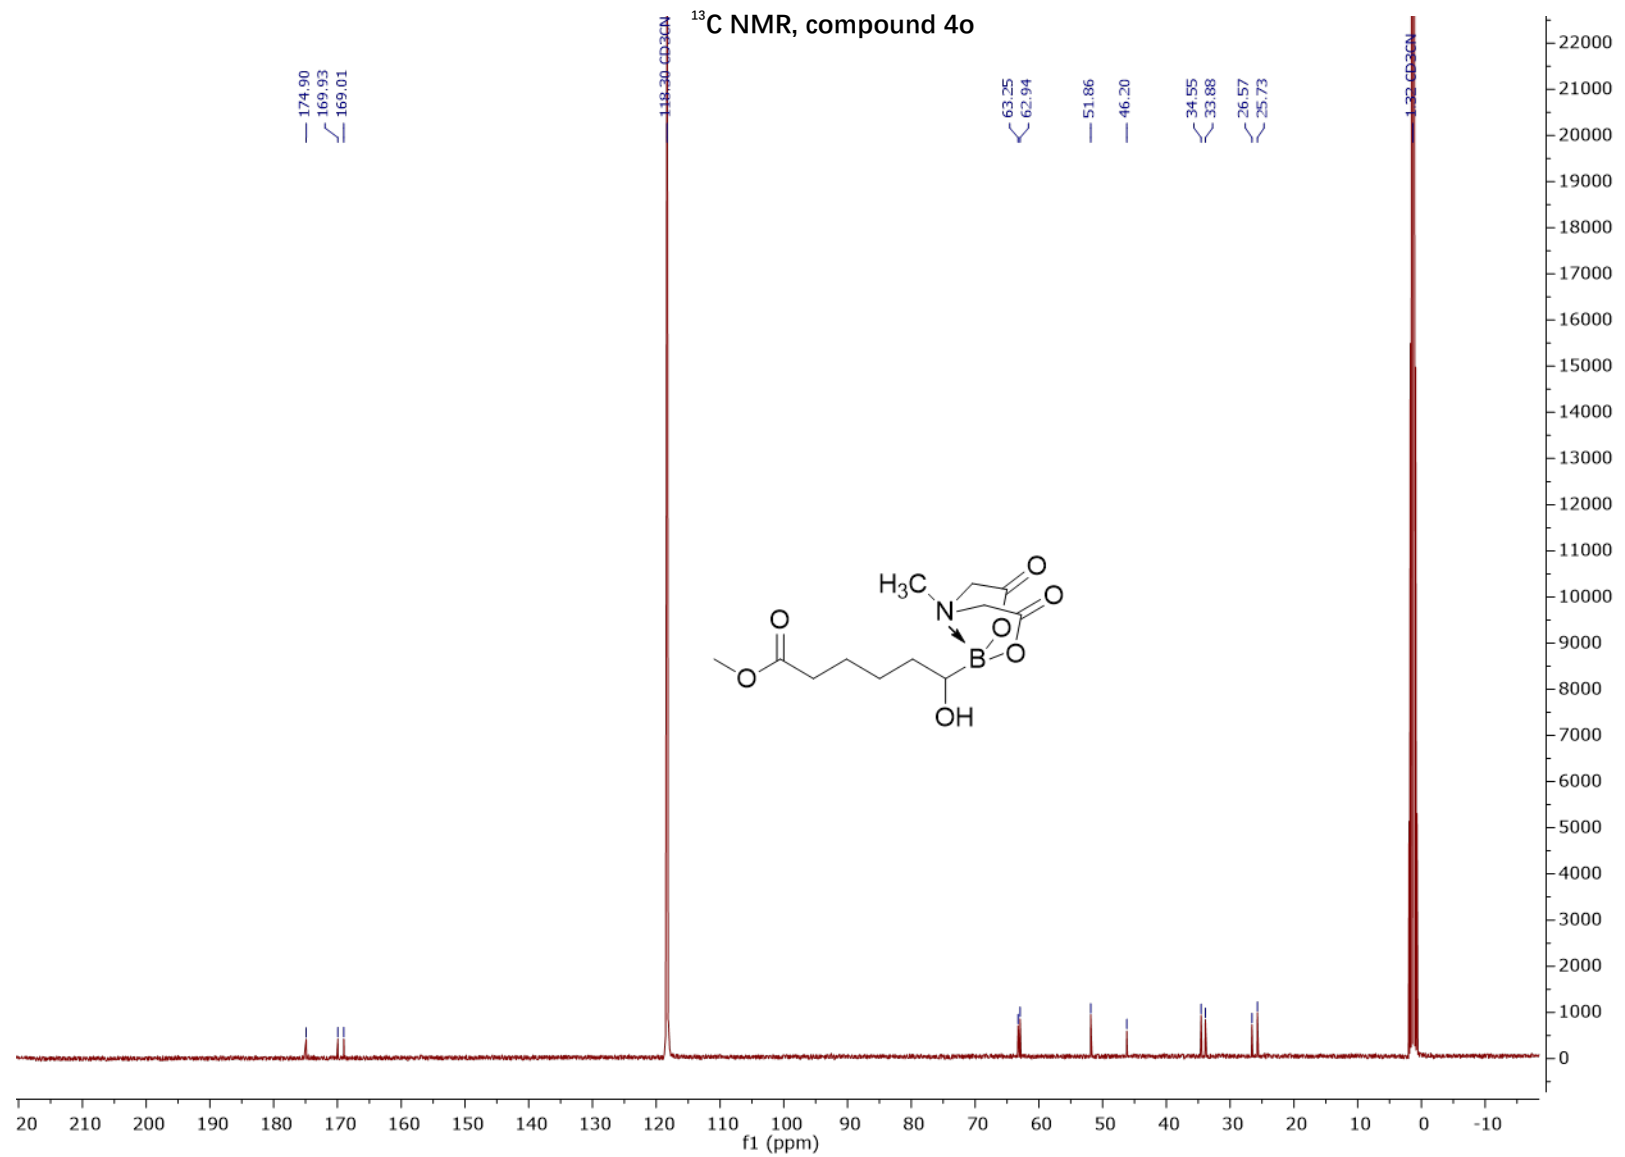



$^{11}\text{B}$  NMR, compound 4o

11.01

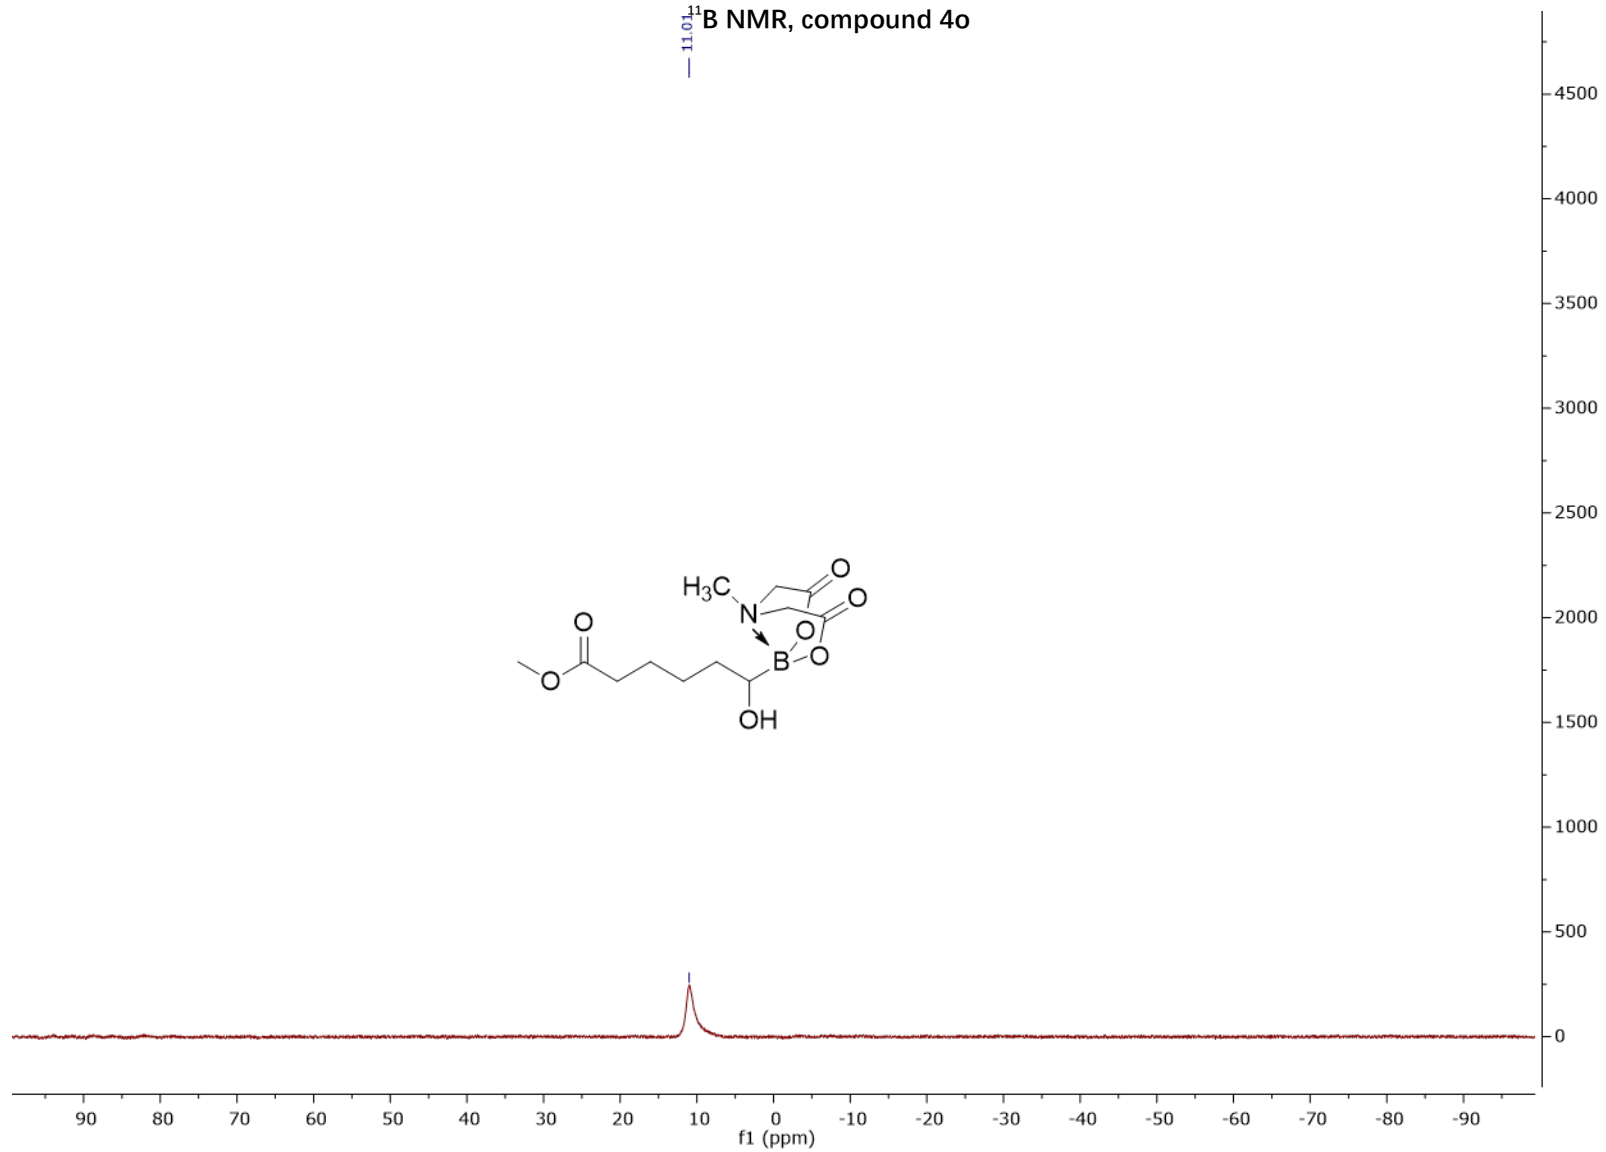

<sup>1</sup>H NMR, compound 4p

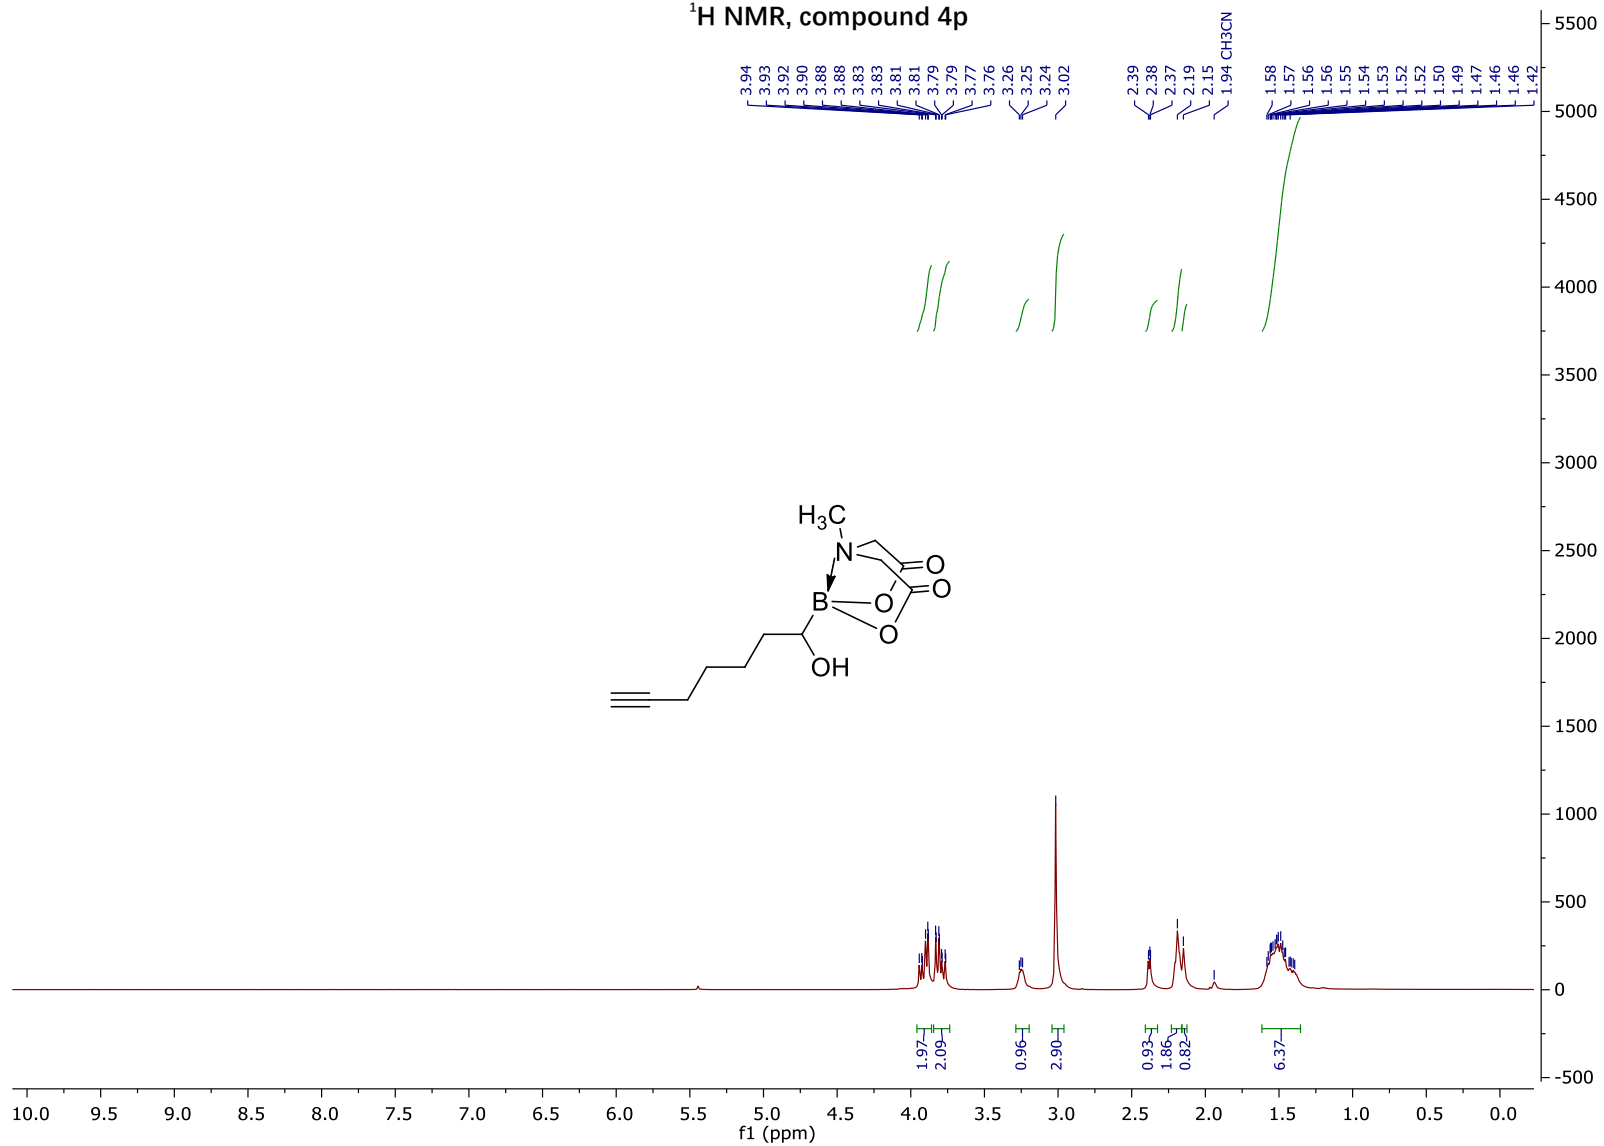

<sup>13</sup>C NMR, compound 4p

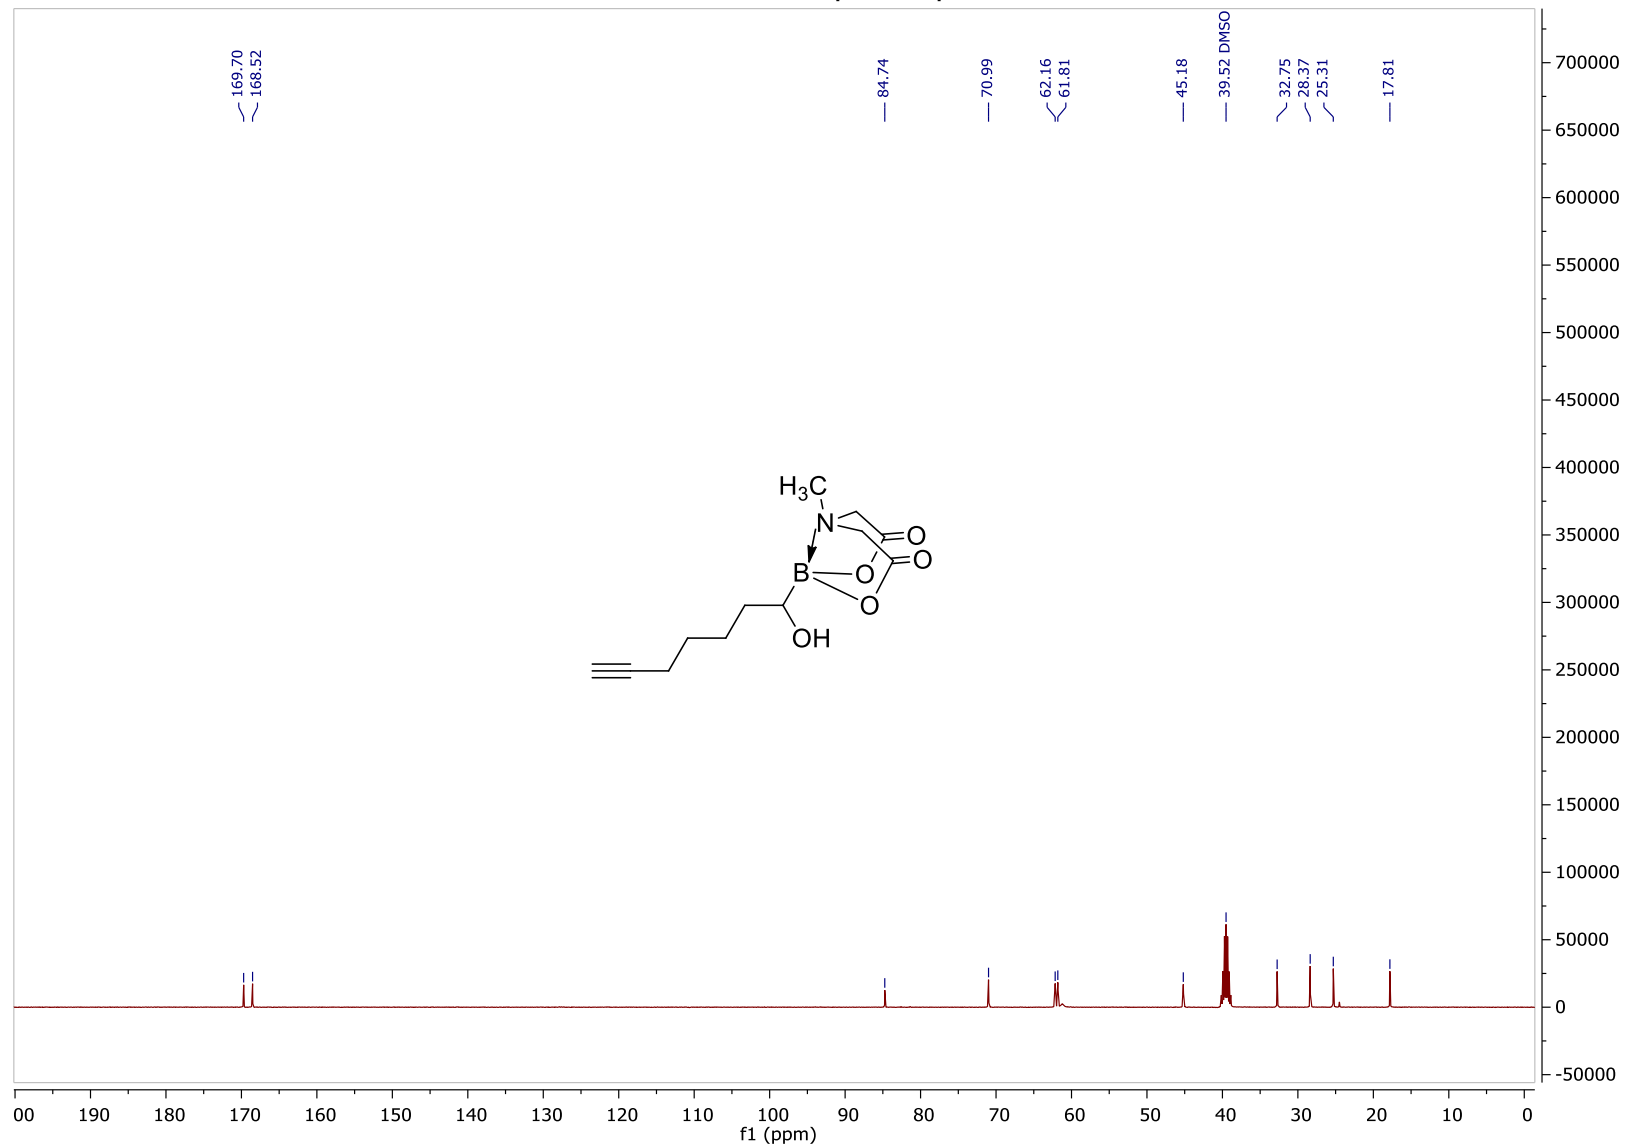

<sup>11</sup>B NMR, compound 4p

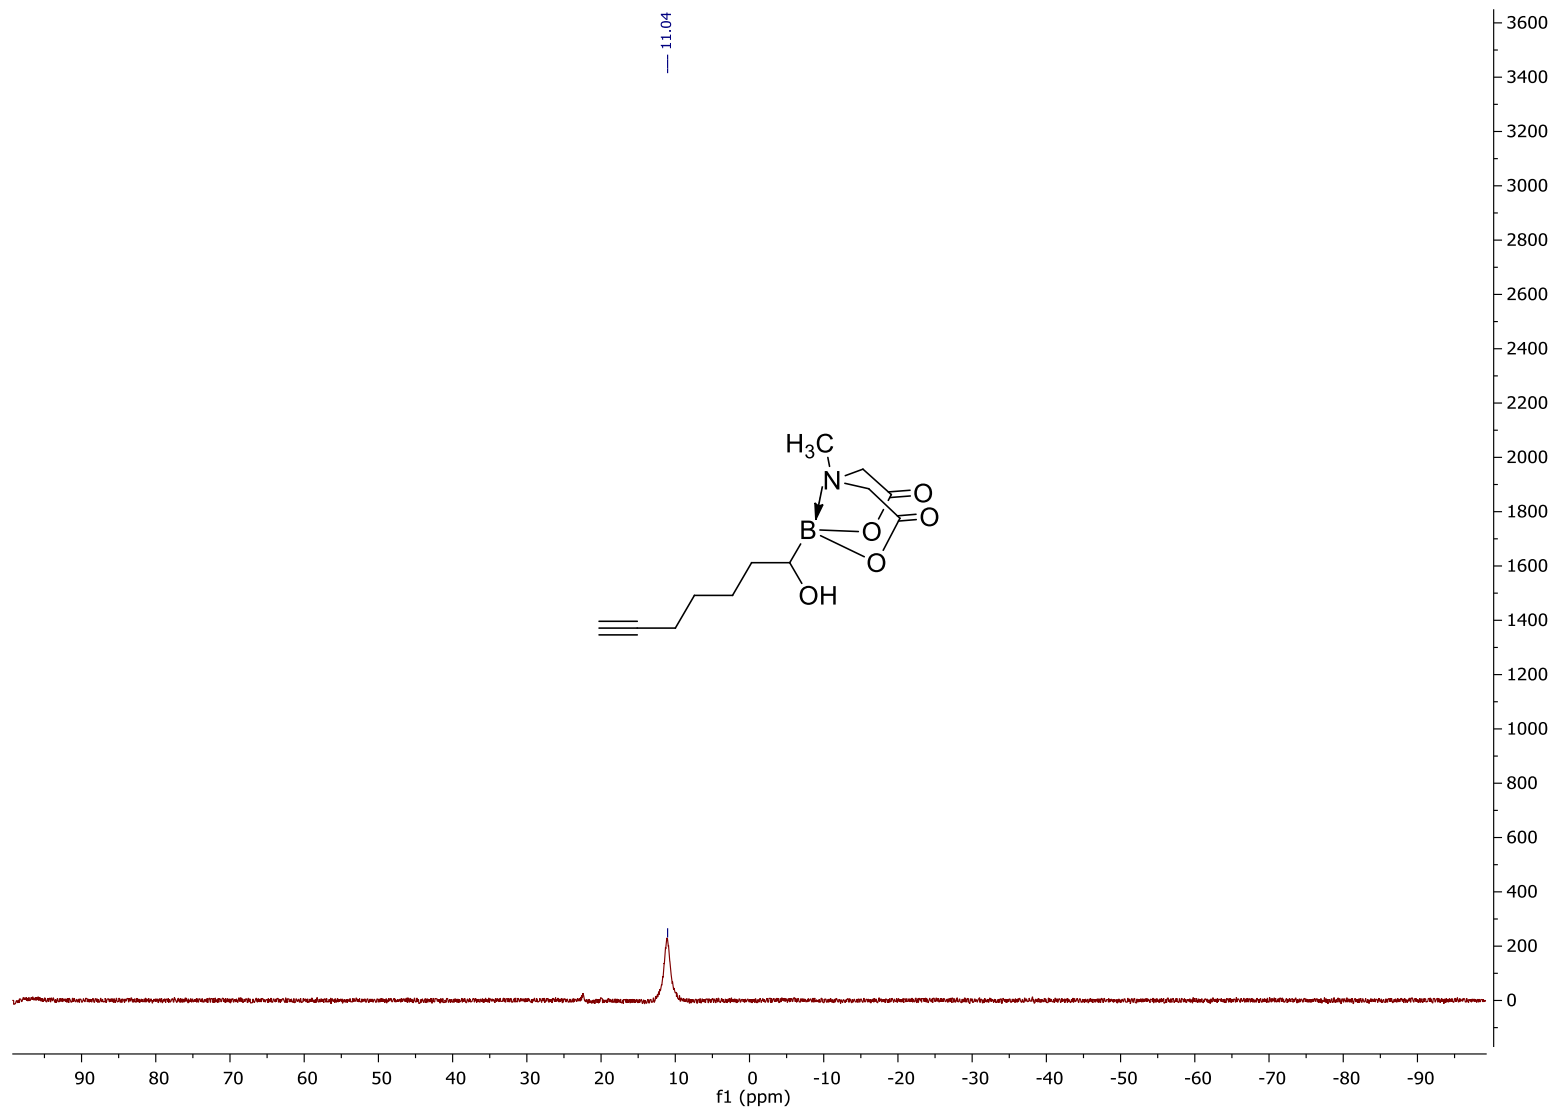

<sup>1</sup>H NMR, compound 4q

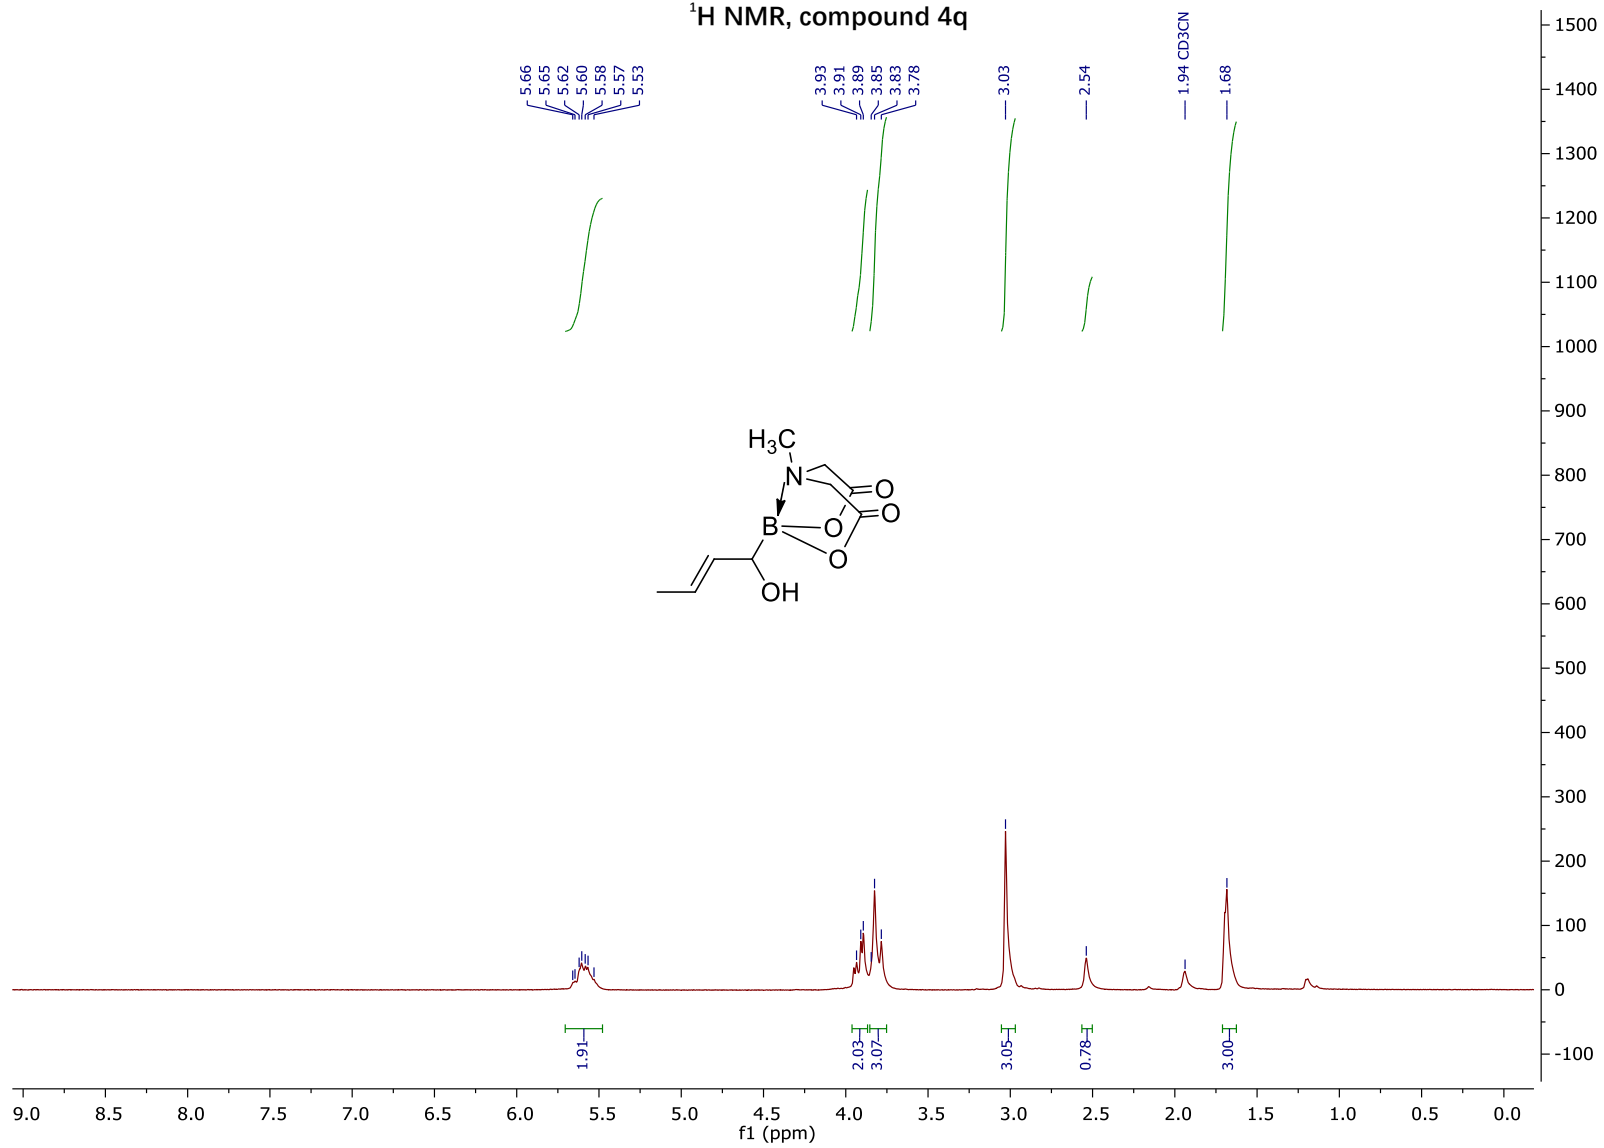

5.66  
5.65  
5.62  
5.60  
5.58  
5.57  
5.53

3.93  
3.91  
3.89  
3.85  
3.83  
3.78

3.03

2.54

1.94 CD<sub>3</sub>CN

1.68

1.91

2.03  
3.07

3.05

0.78

3.00

<sup>13</sup>C NMR, compound 4q

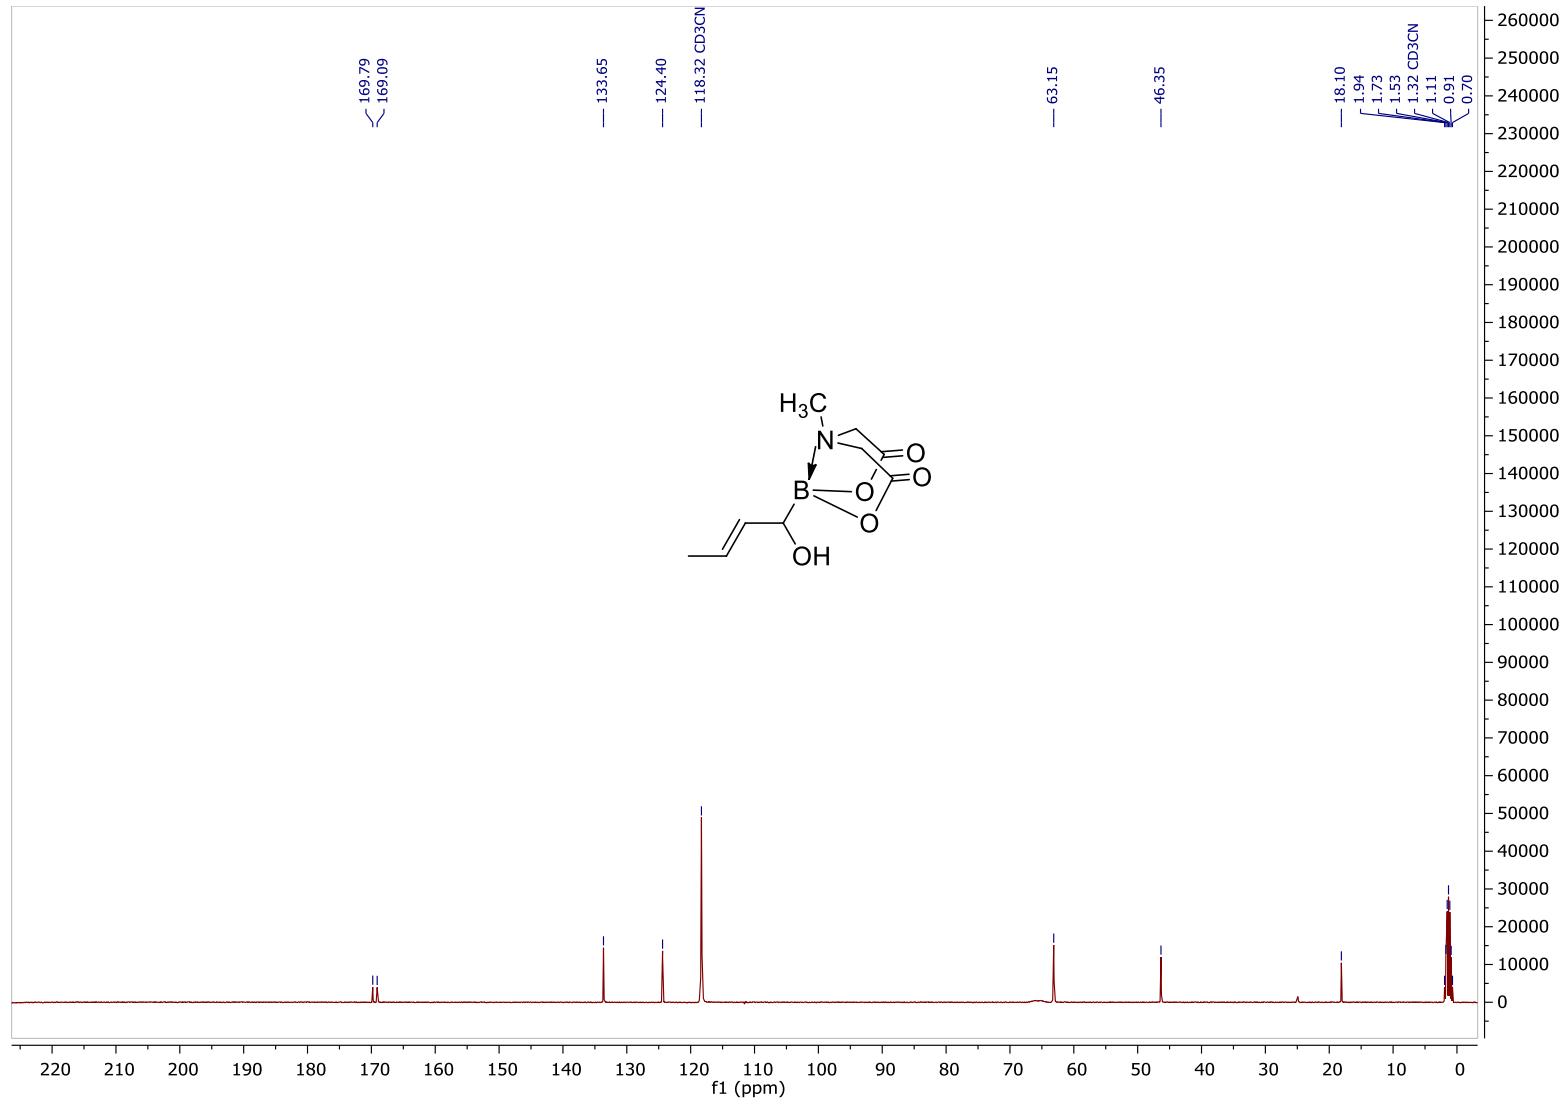

<sup>11</sup>B NMR, compound 4q

10.44

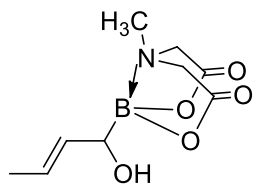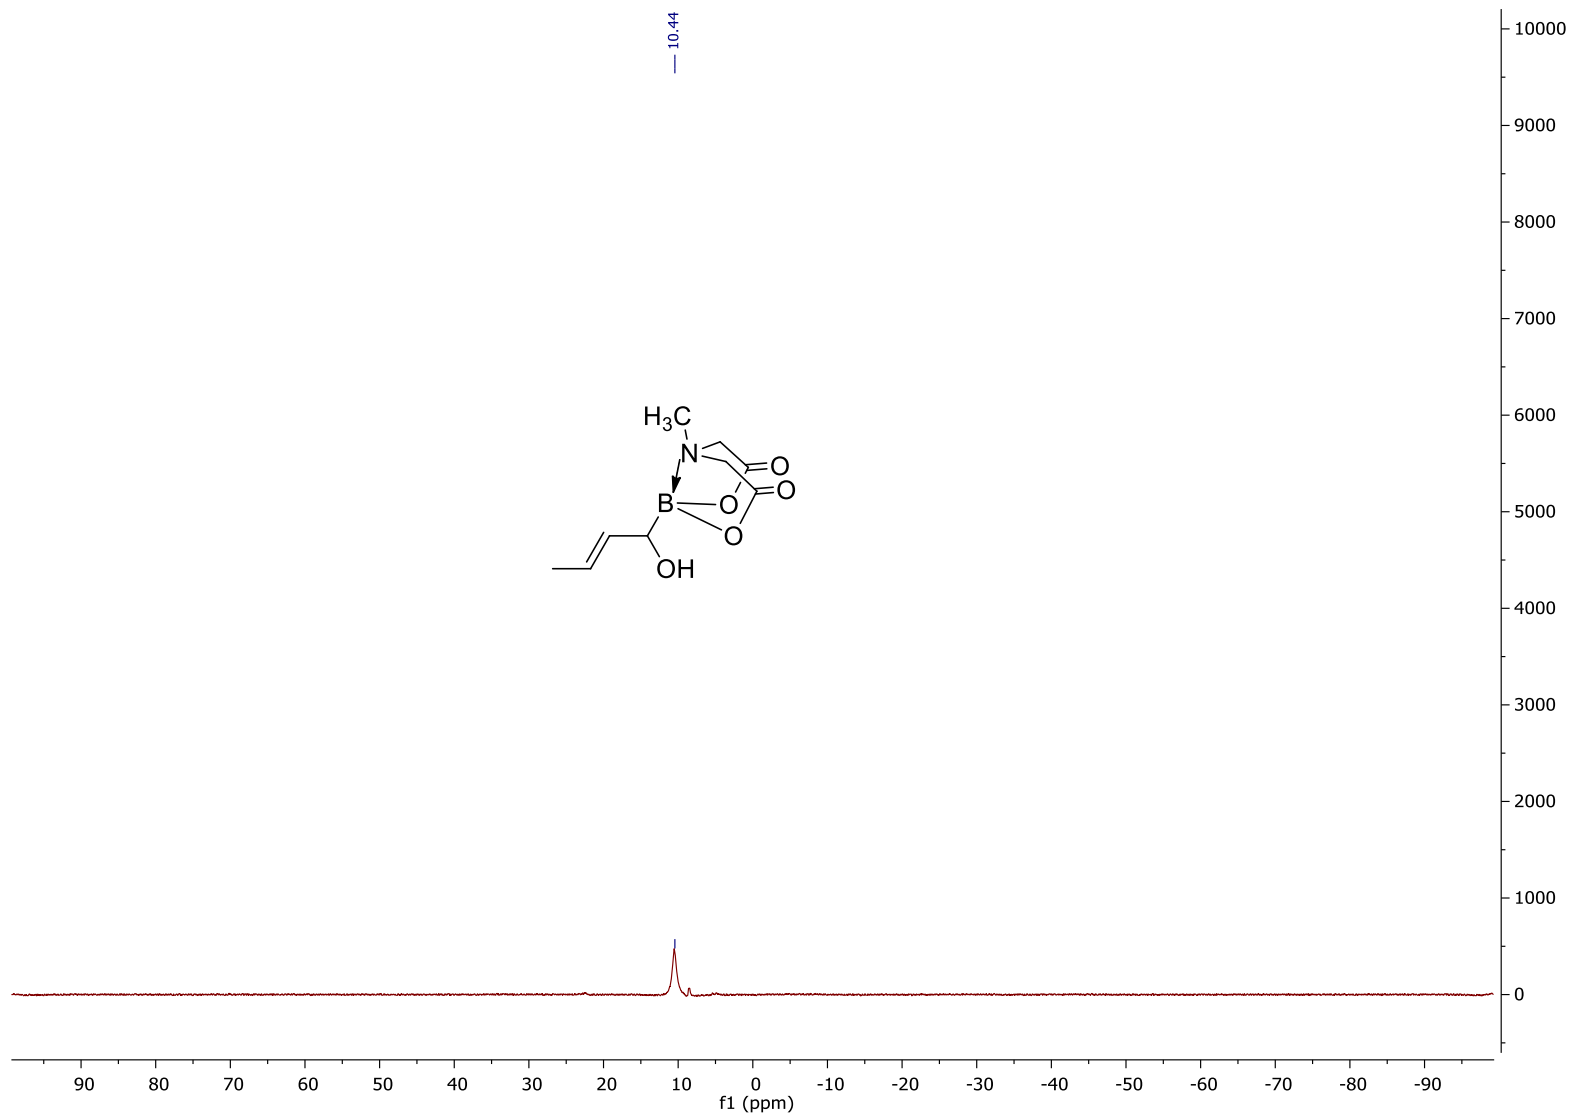

<sup>1</sup>H NMR, compound 4s

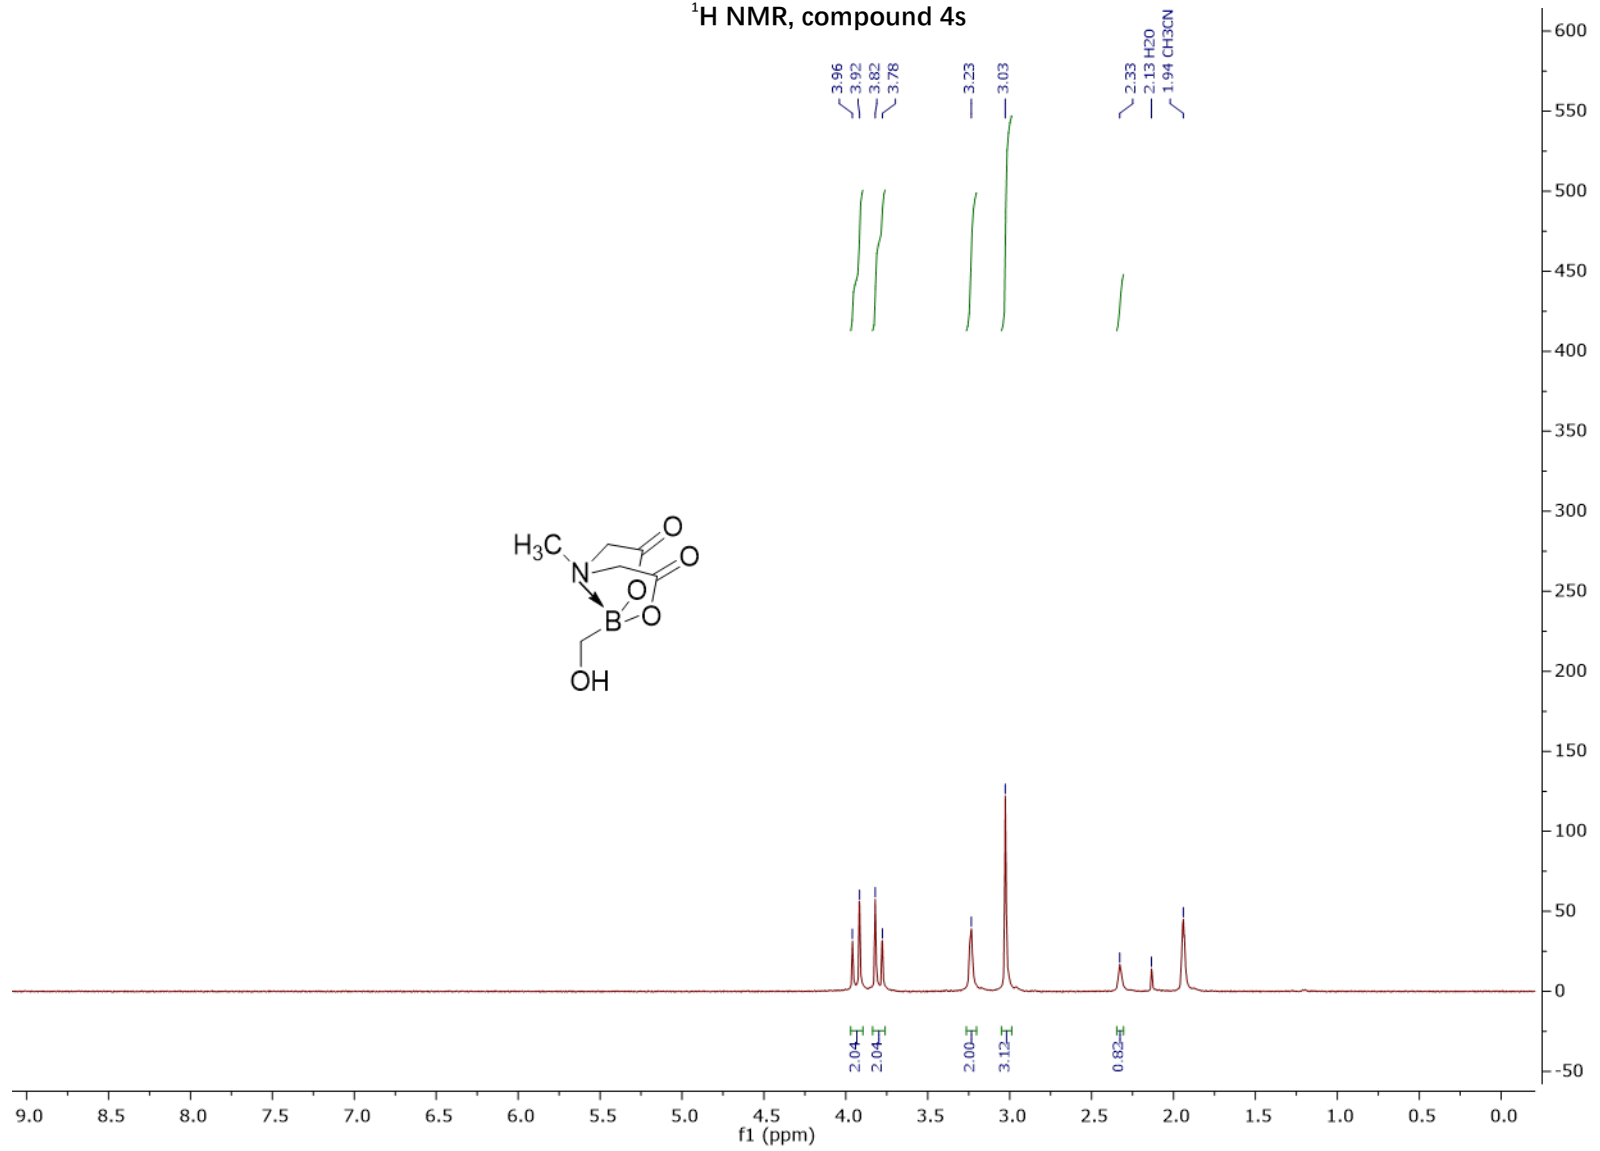



<sup>13</sup>C NMR, compound 4s

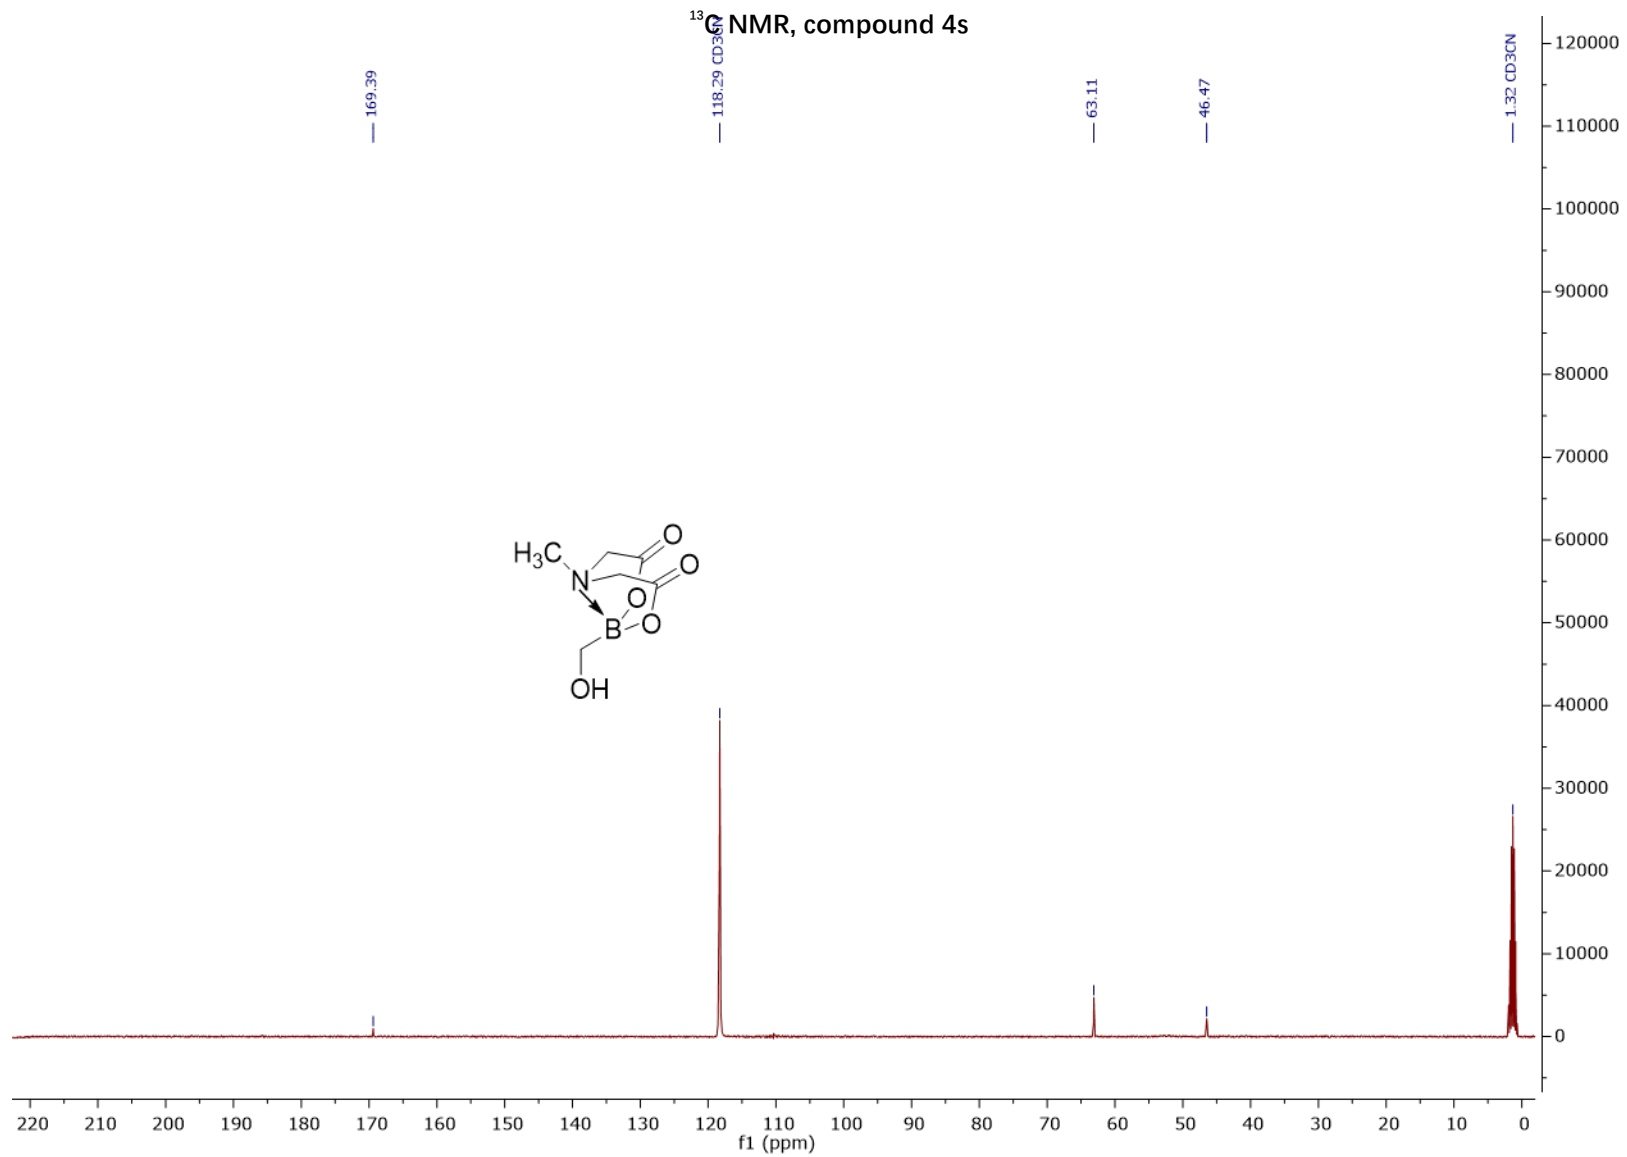

<sup>11</sup>B NMR, compound 4s

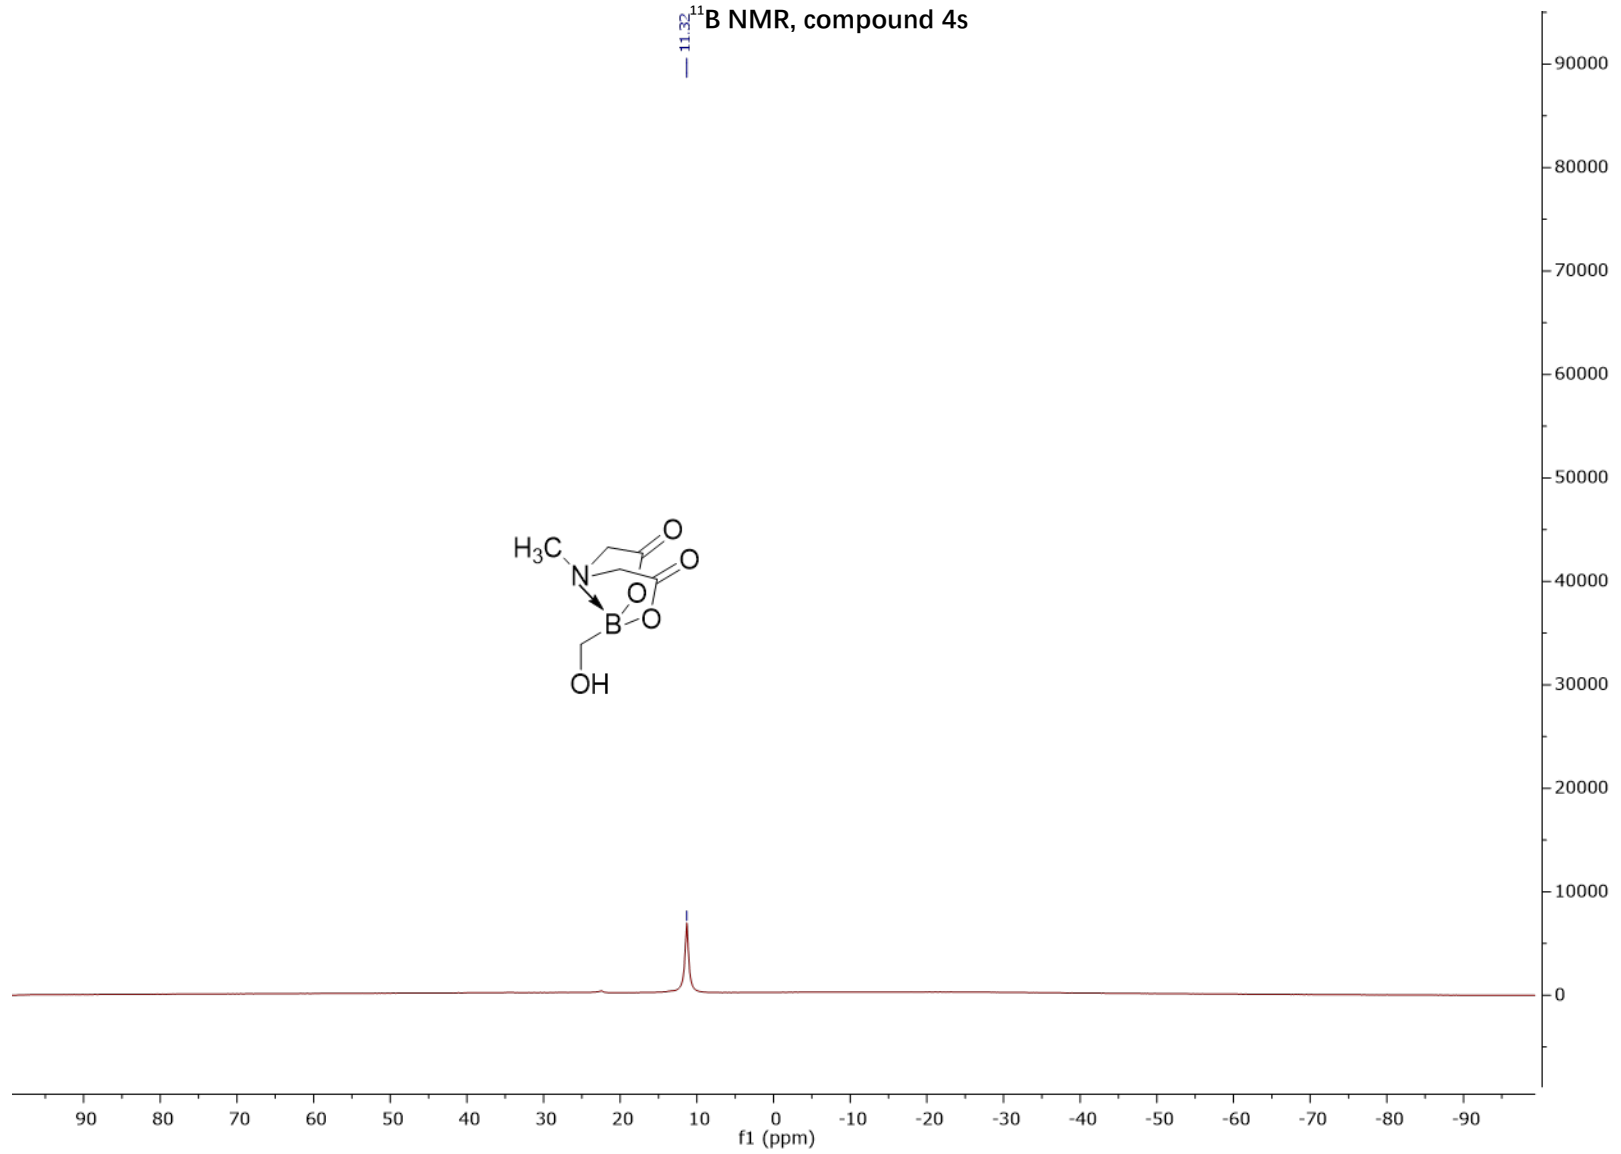

<sup>1</sup>H NMR, compound 5a

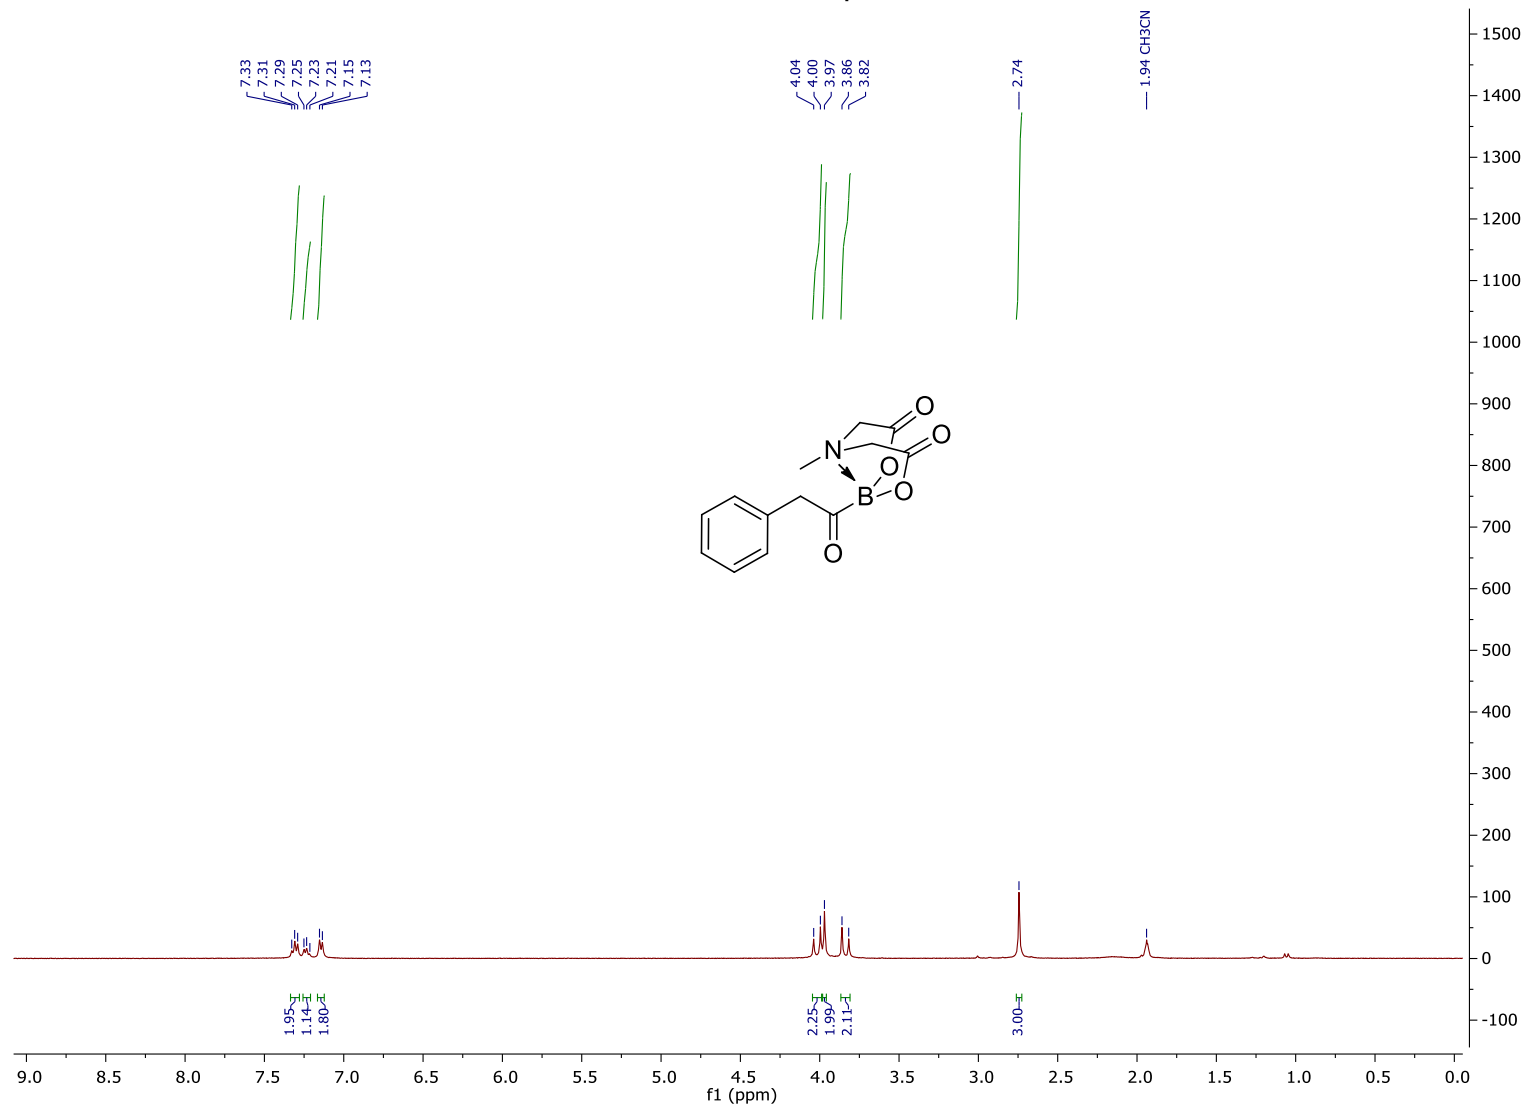

<sup>13</sup>C NMR, compound 5a

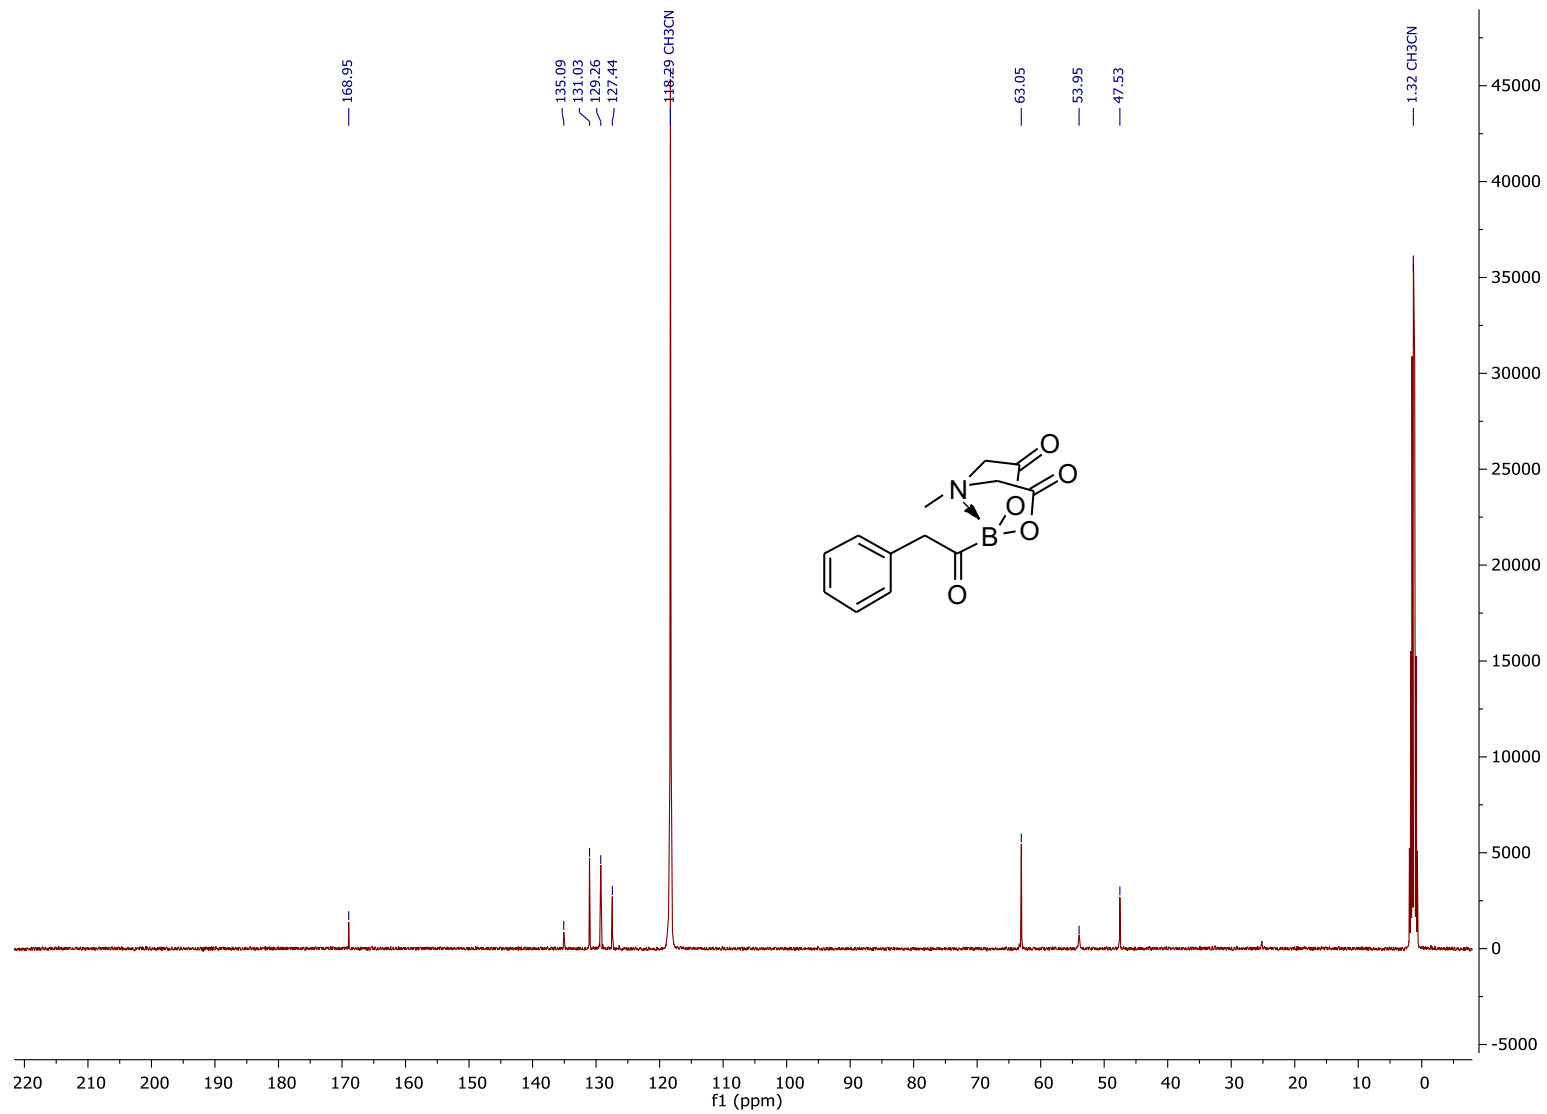

<sup>11</sup>B NMR, compound 5a

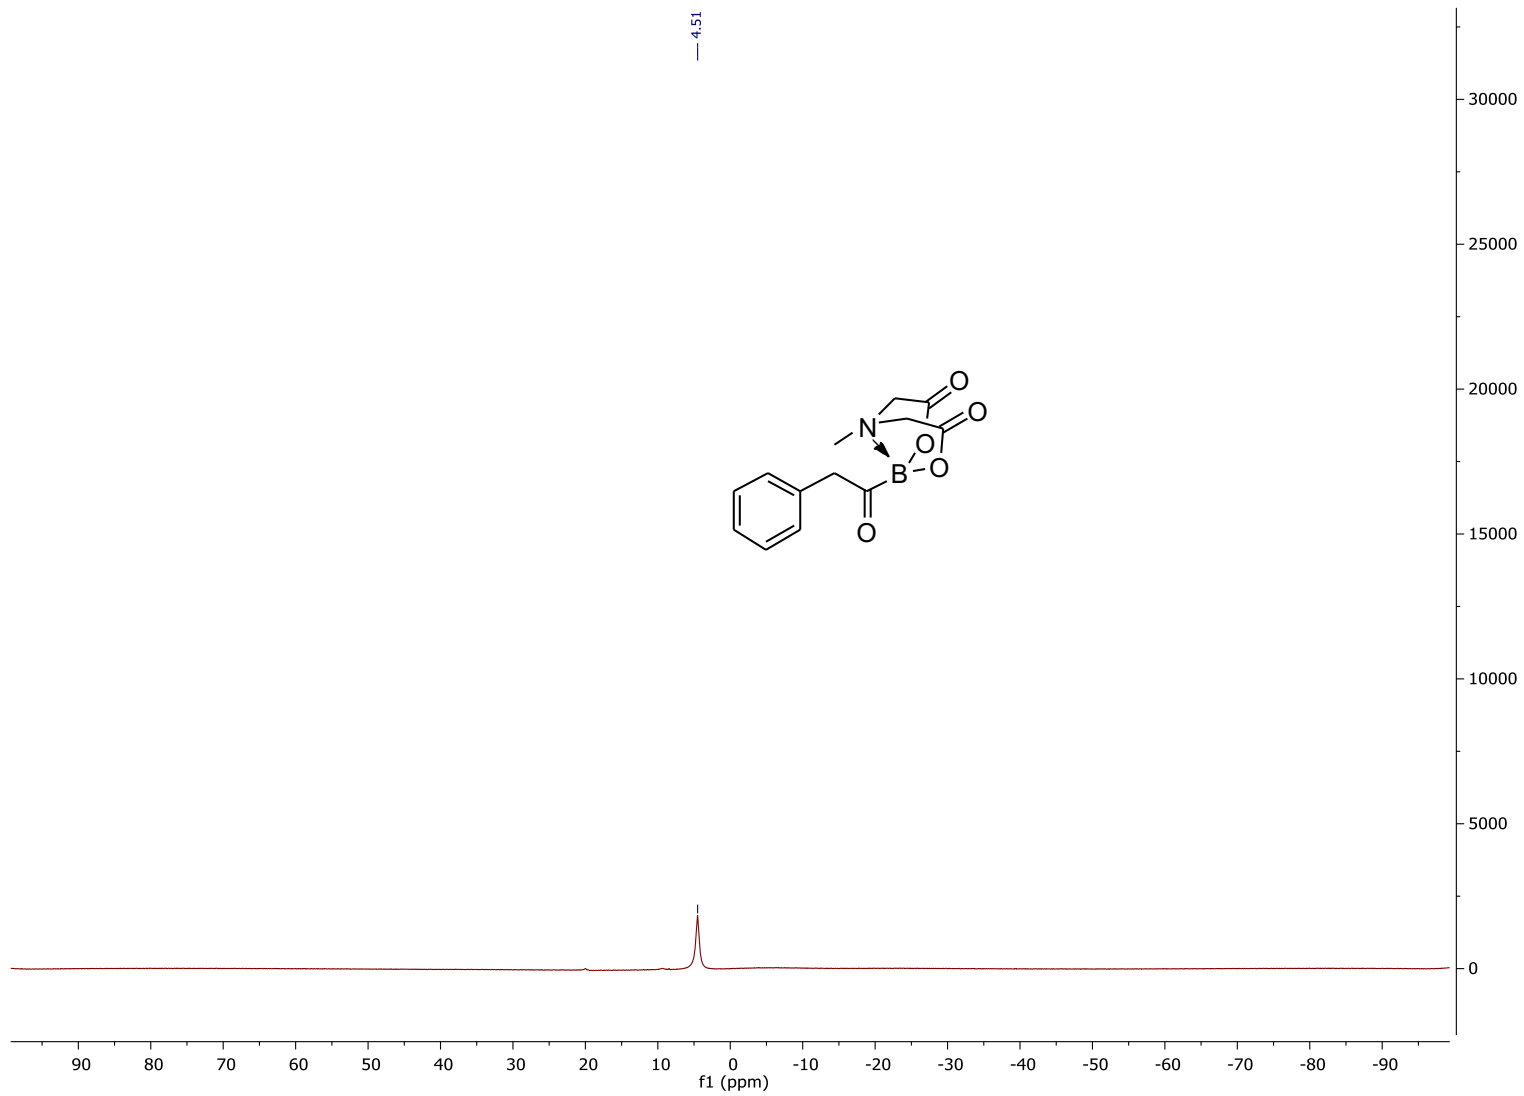

<sup>1</sup>H NMR, compound 5b

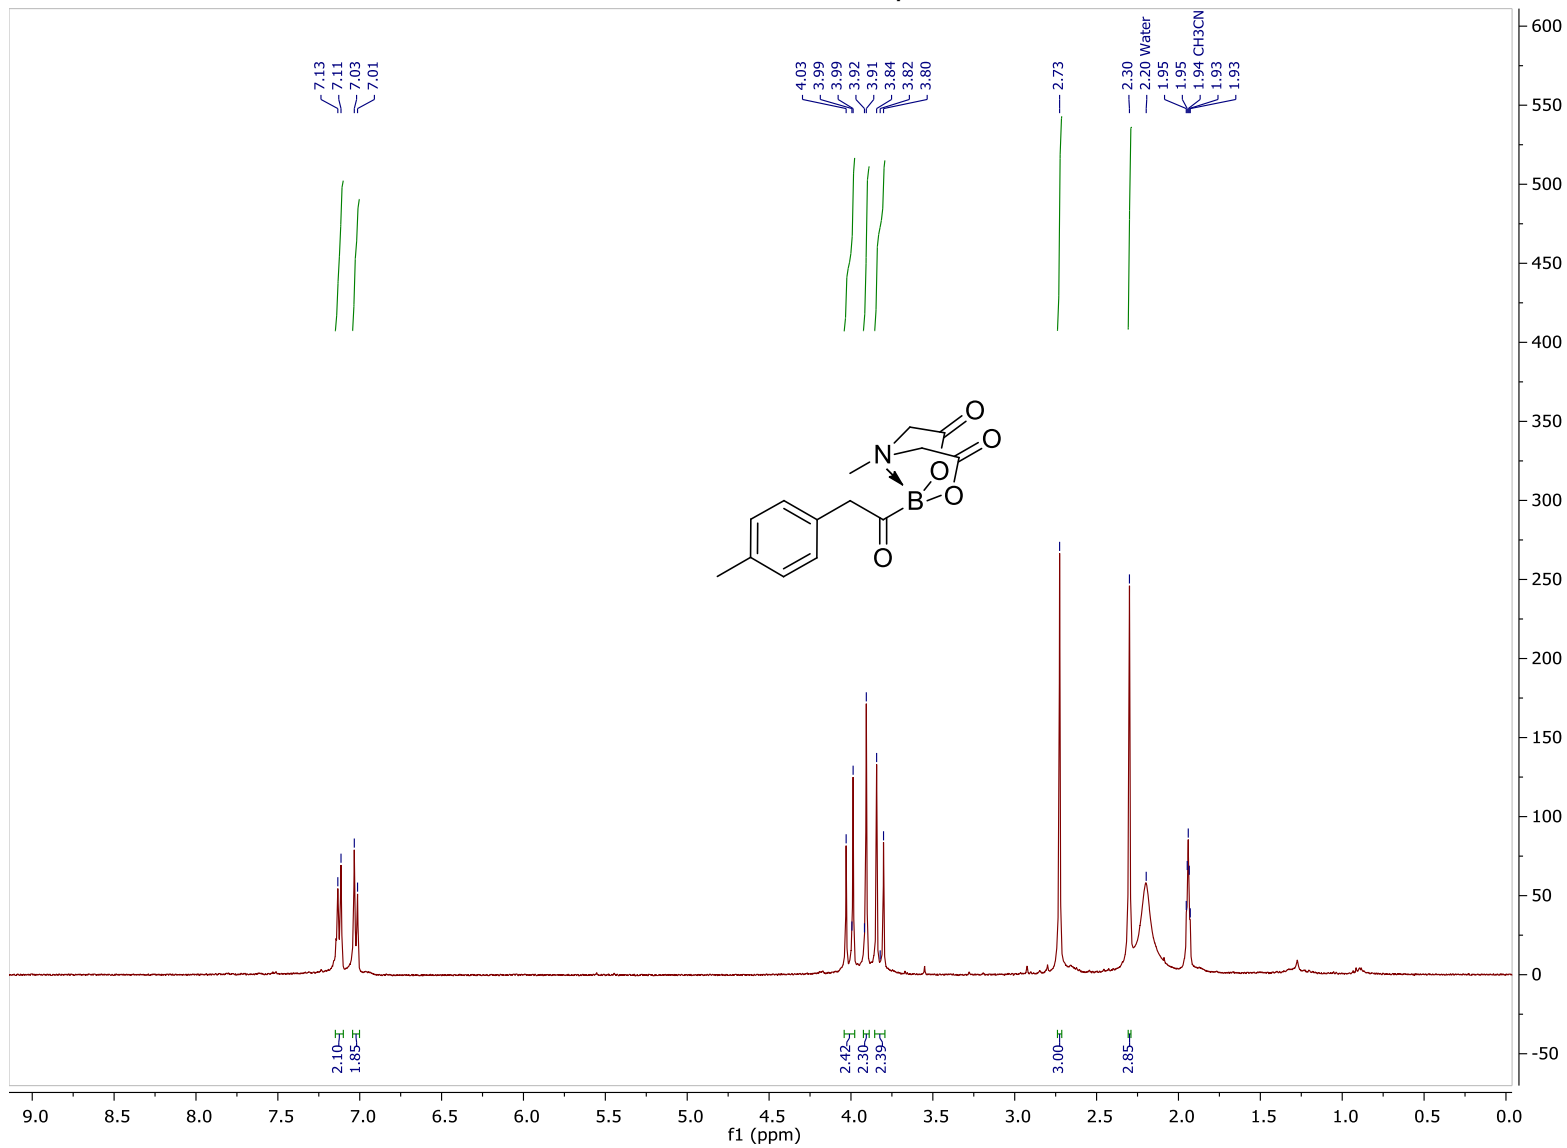

<sup>13</sup>C NMR, compound 5b

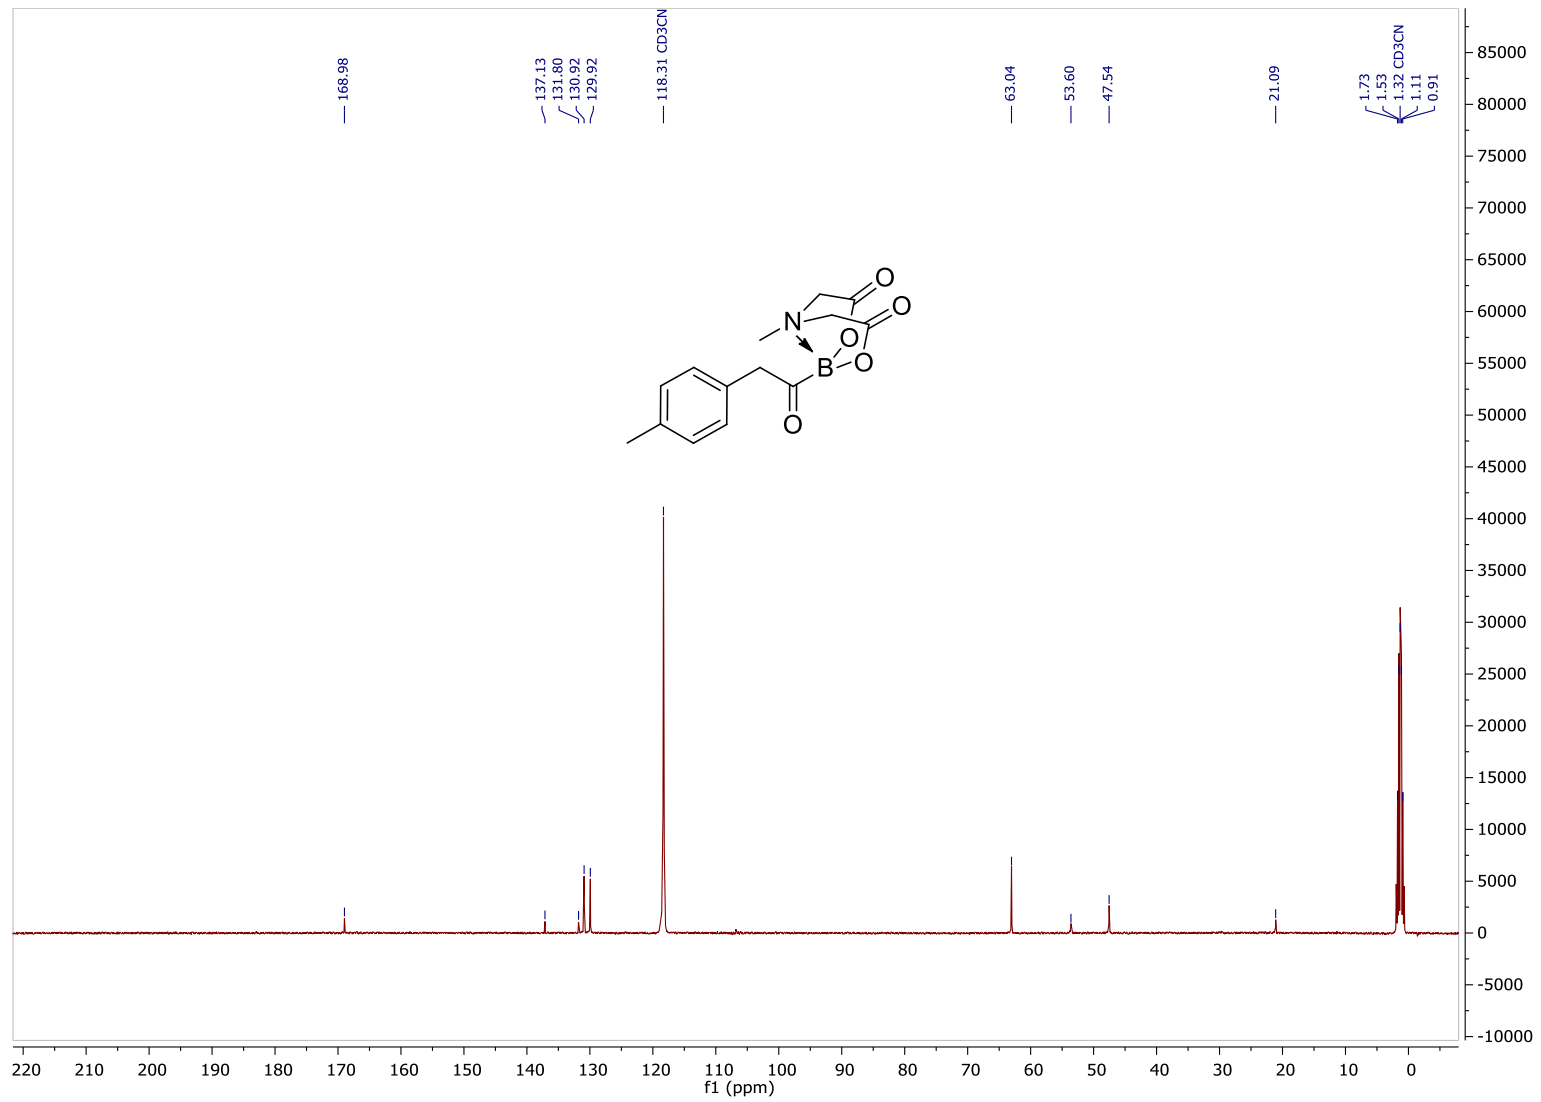

<sup>11</sup>B NMR, compound 5b

4.49

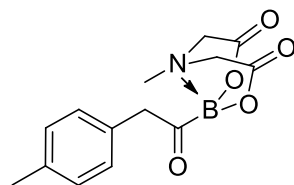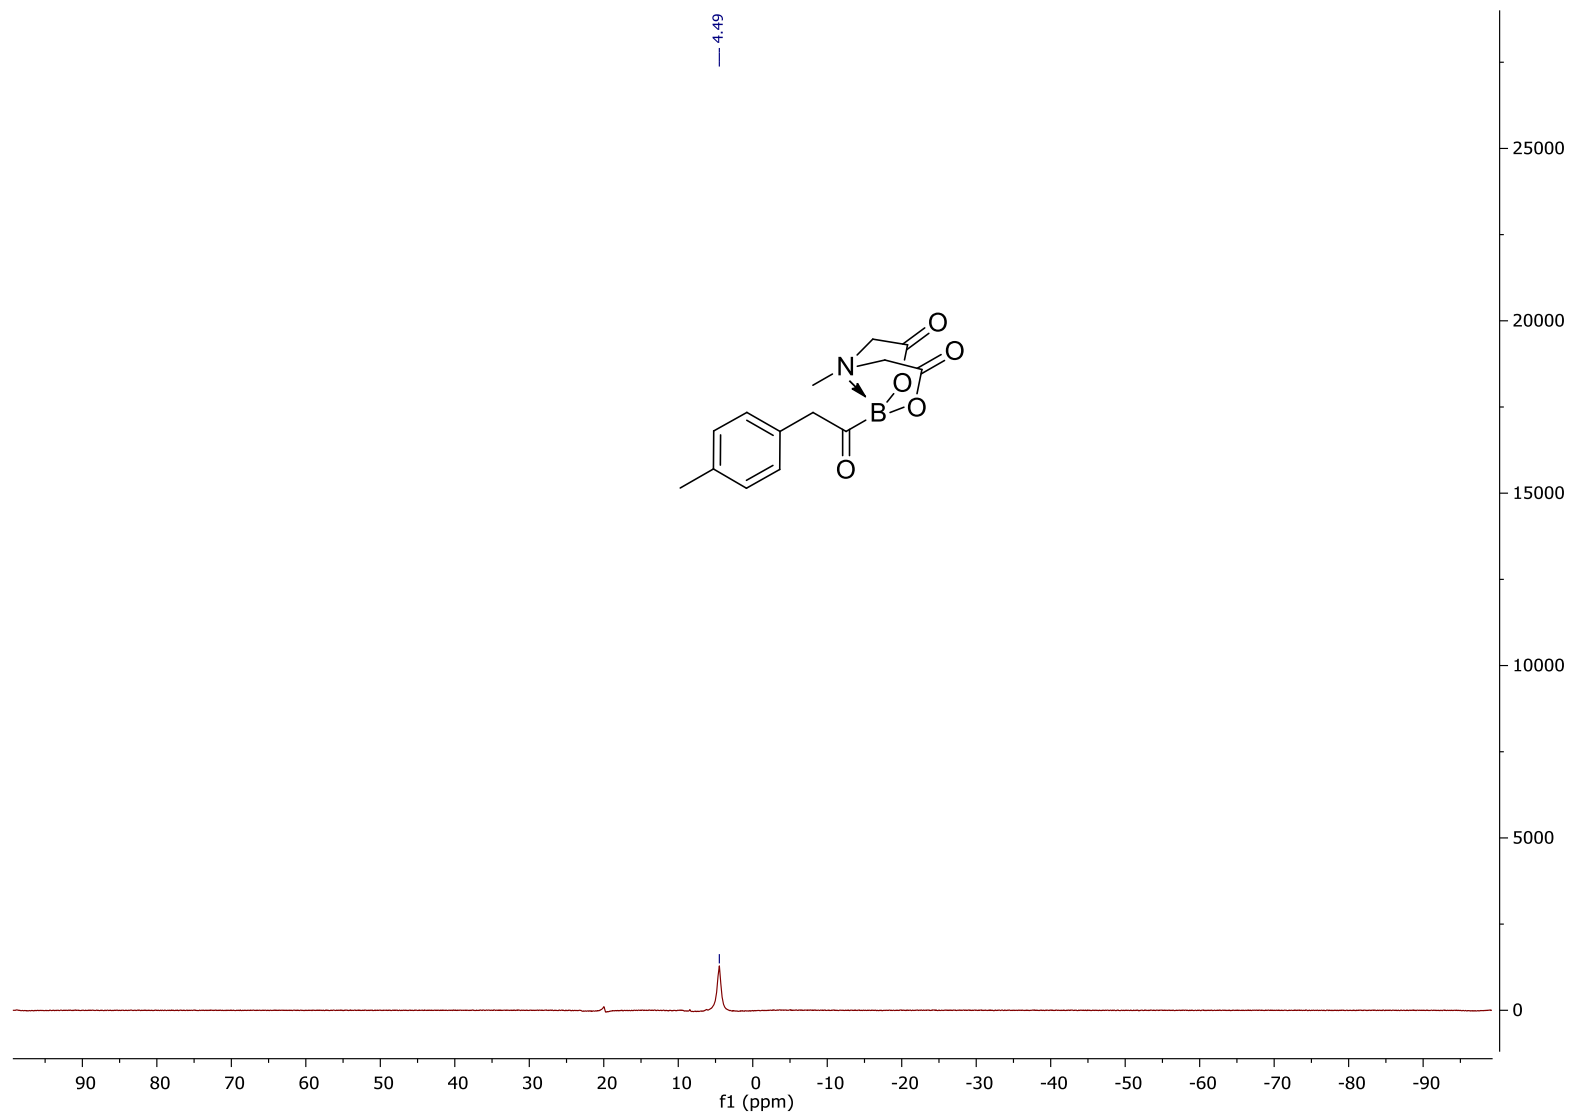



<sup>1</sup>H NMR, compound 5c

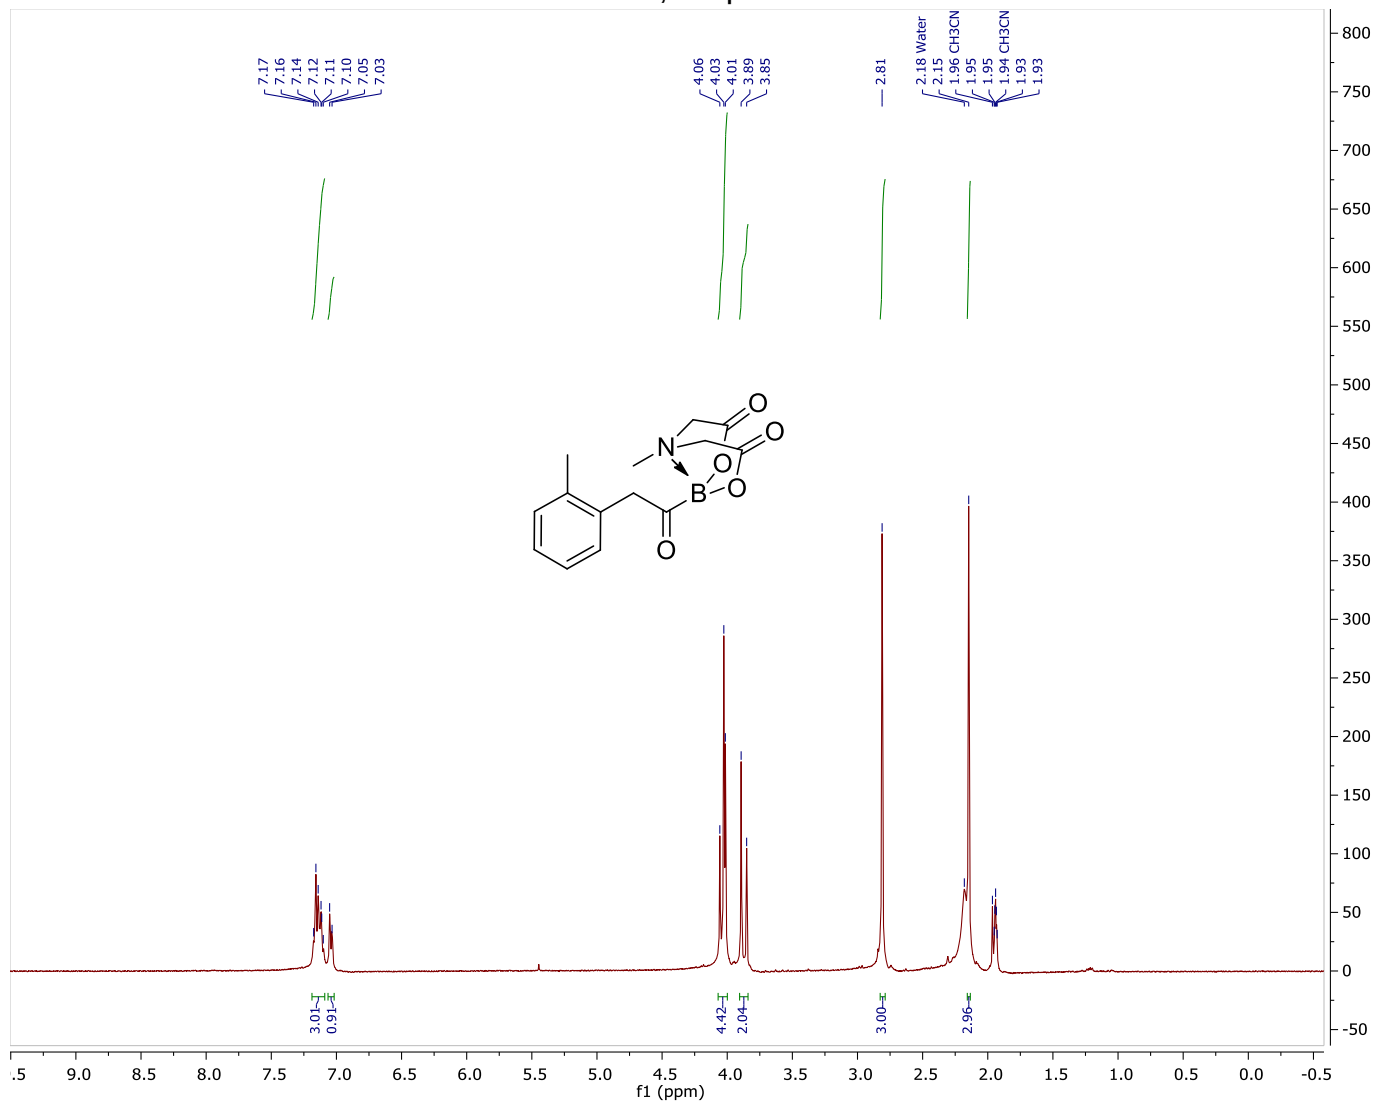

<sup>13</sup>C NMR, compound 5c

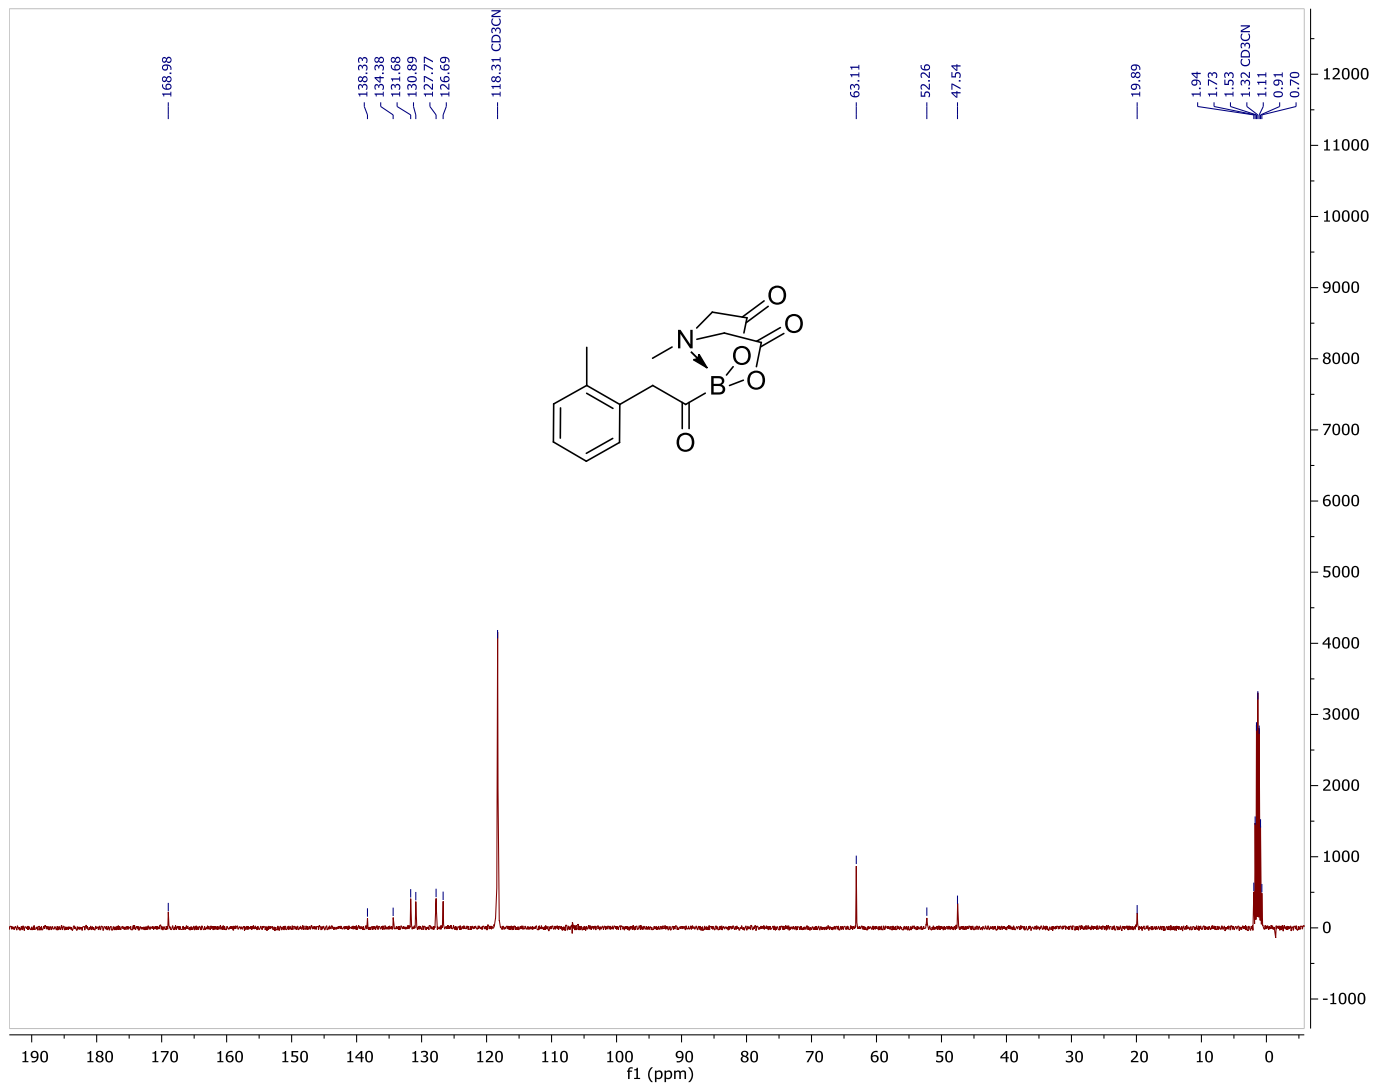

<sup>11</sup>B NMR, compound 5c

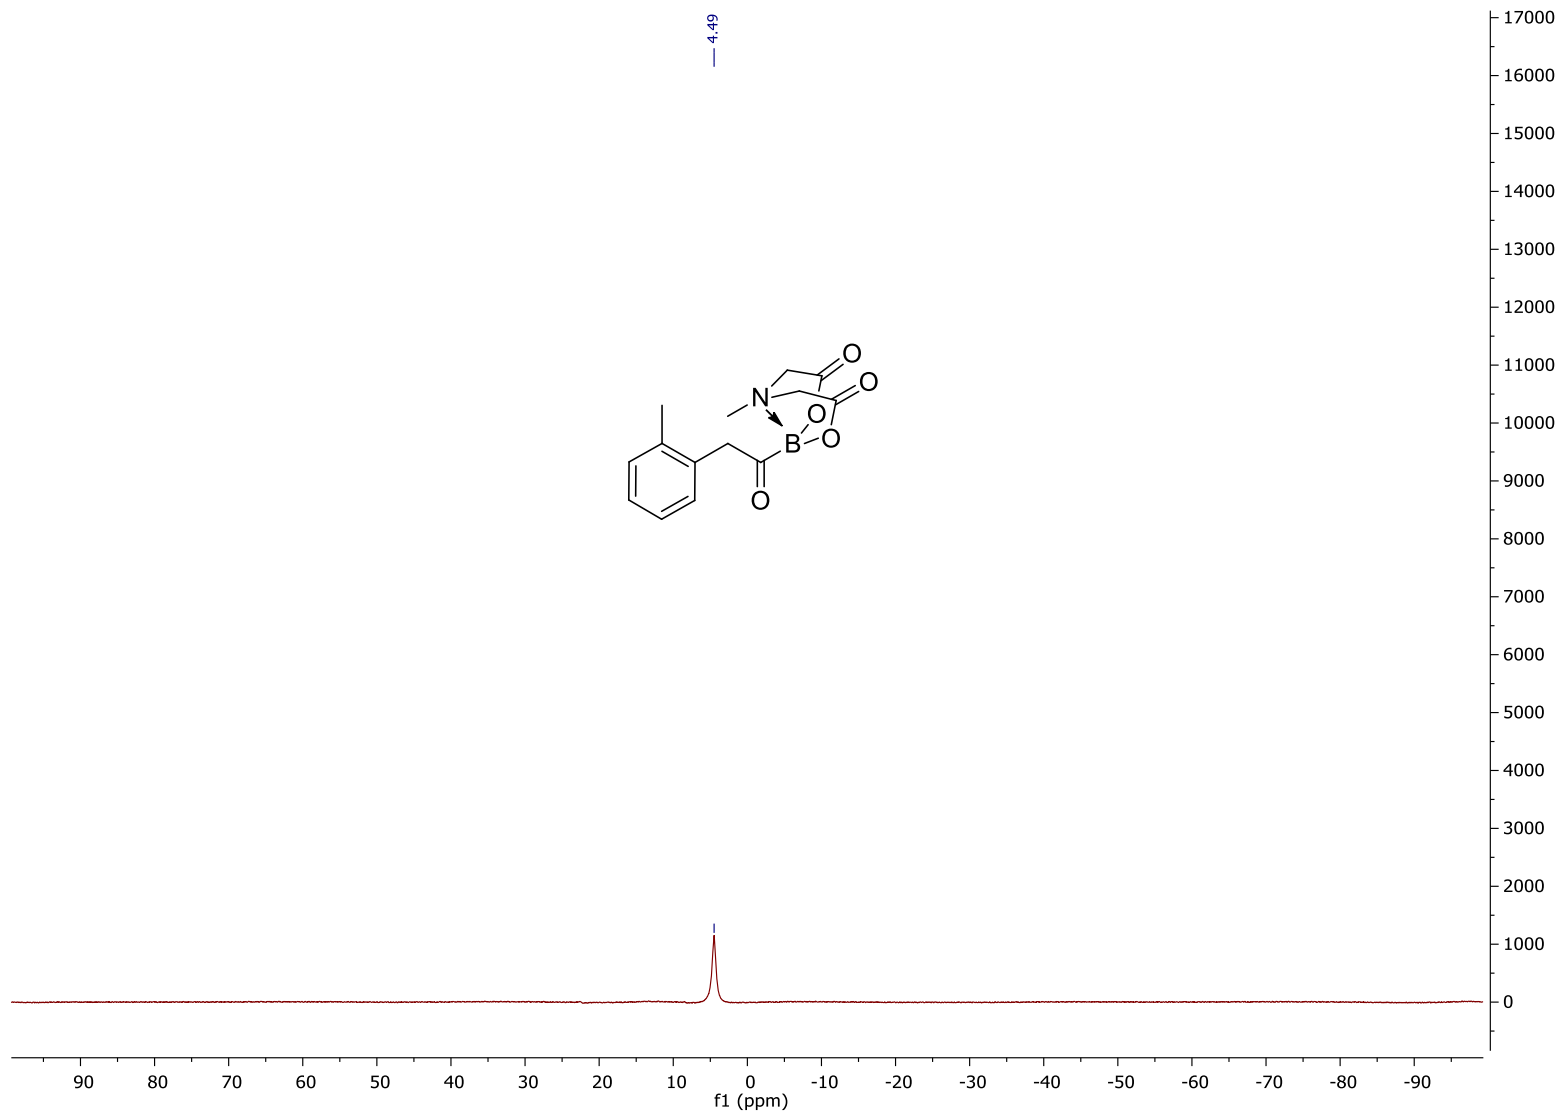

<sup>1</sup>H NMR, compound 5d

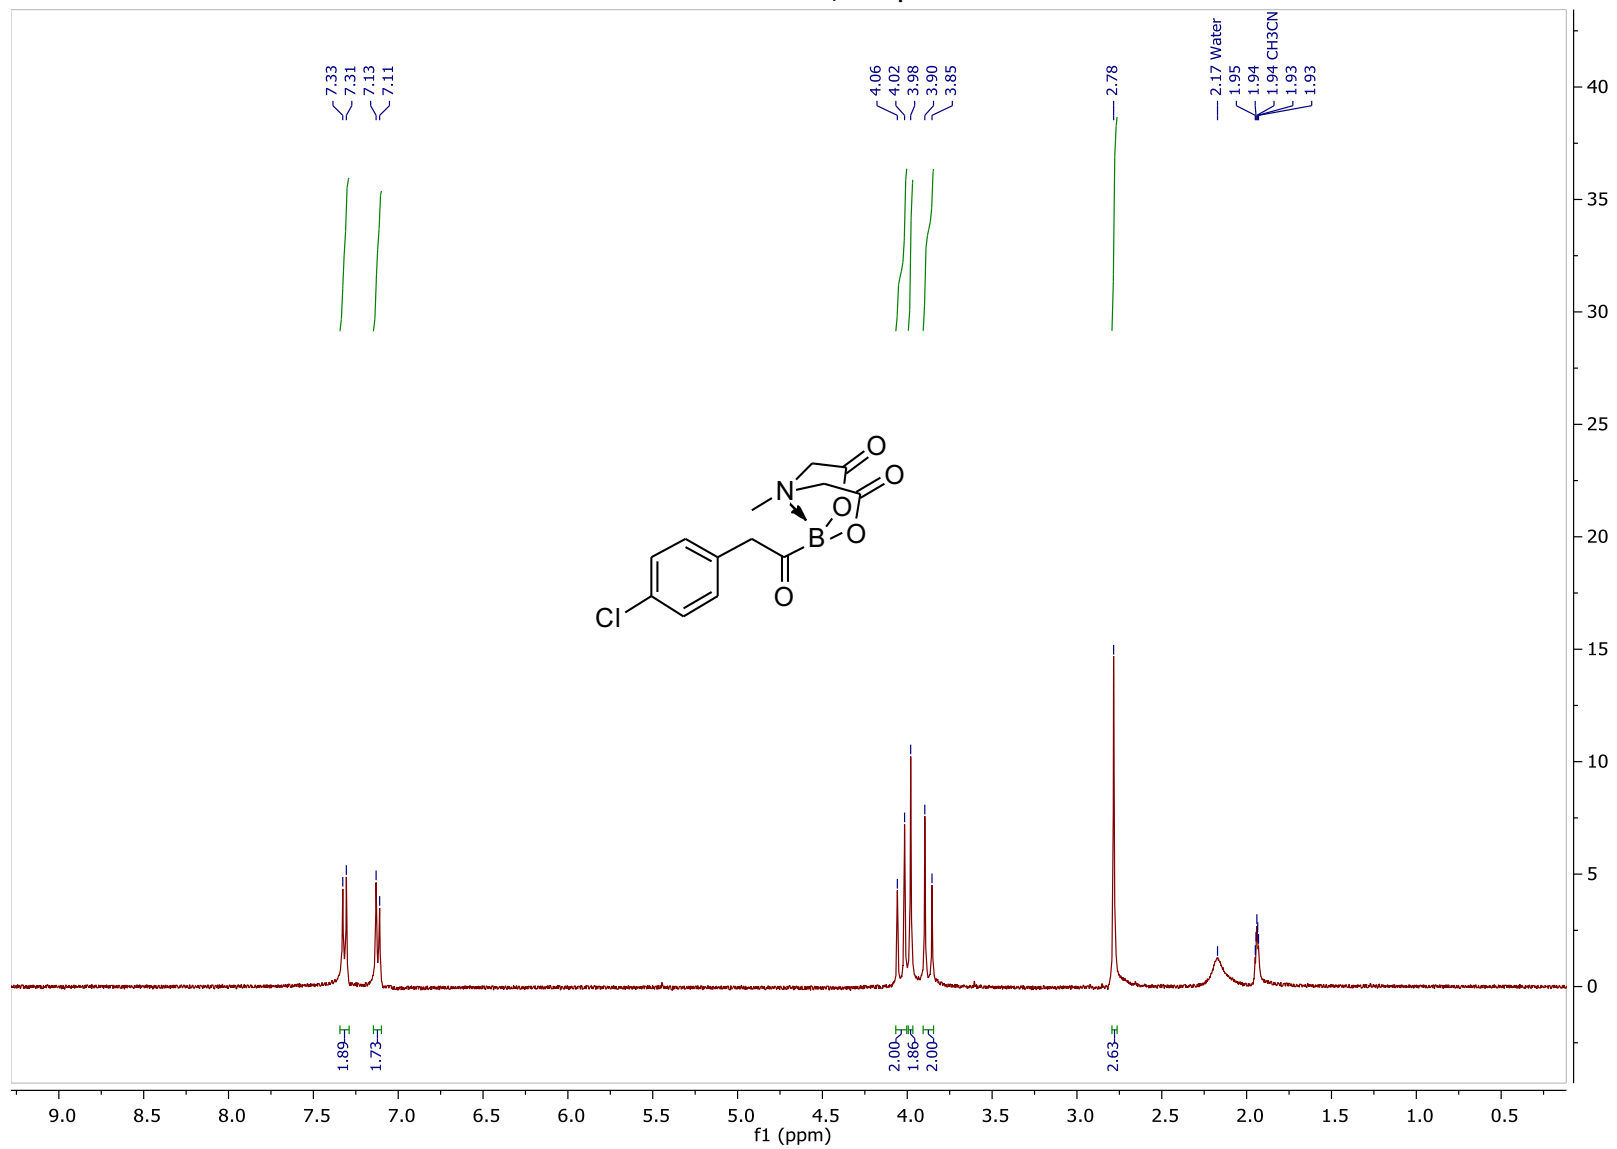

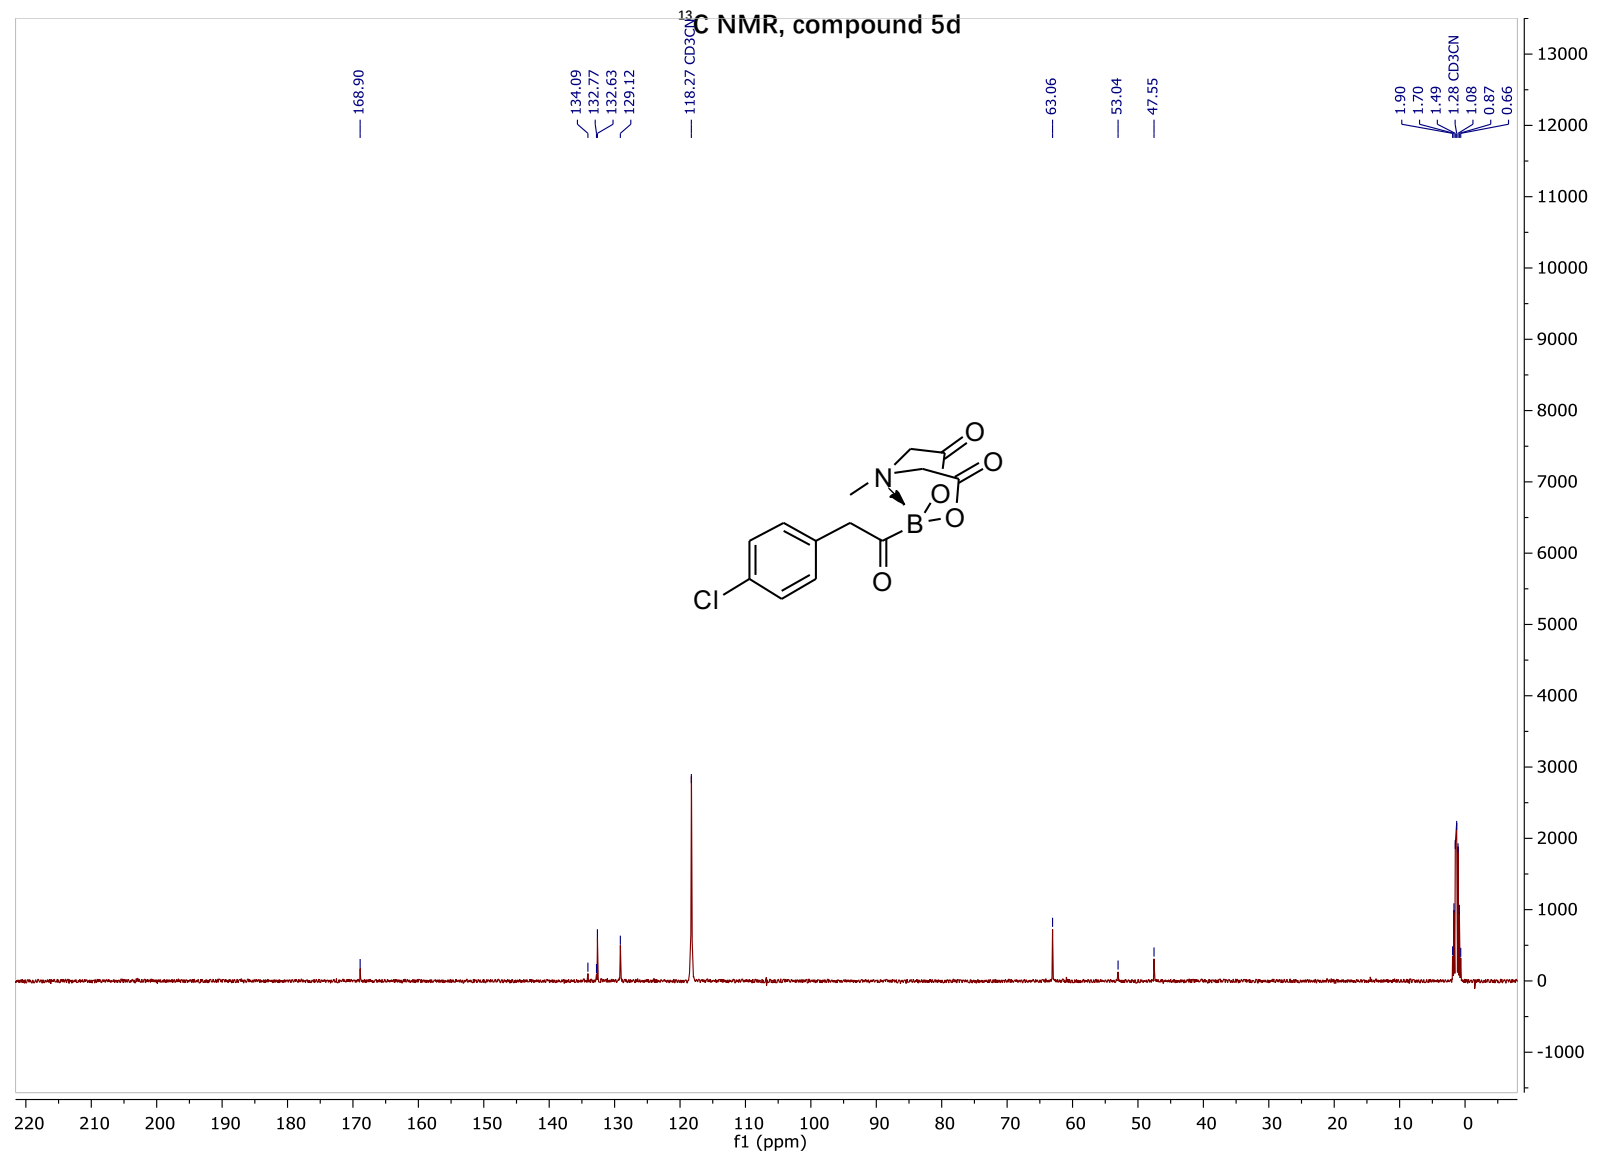

<sup>11</sup>B NMR, compound 5d

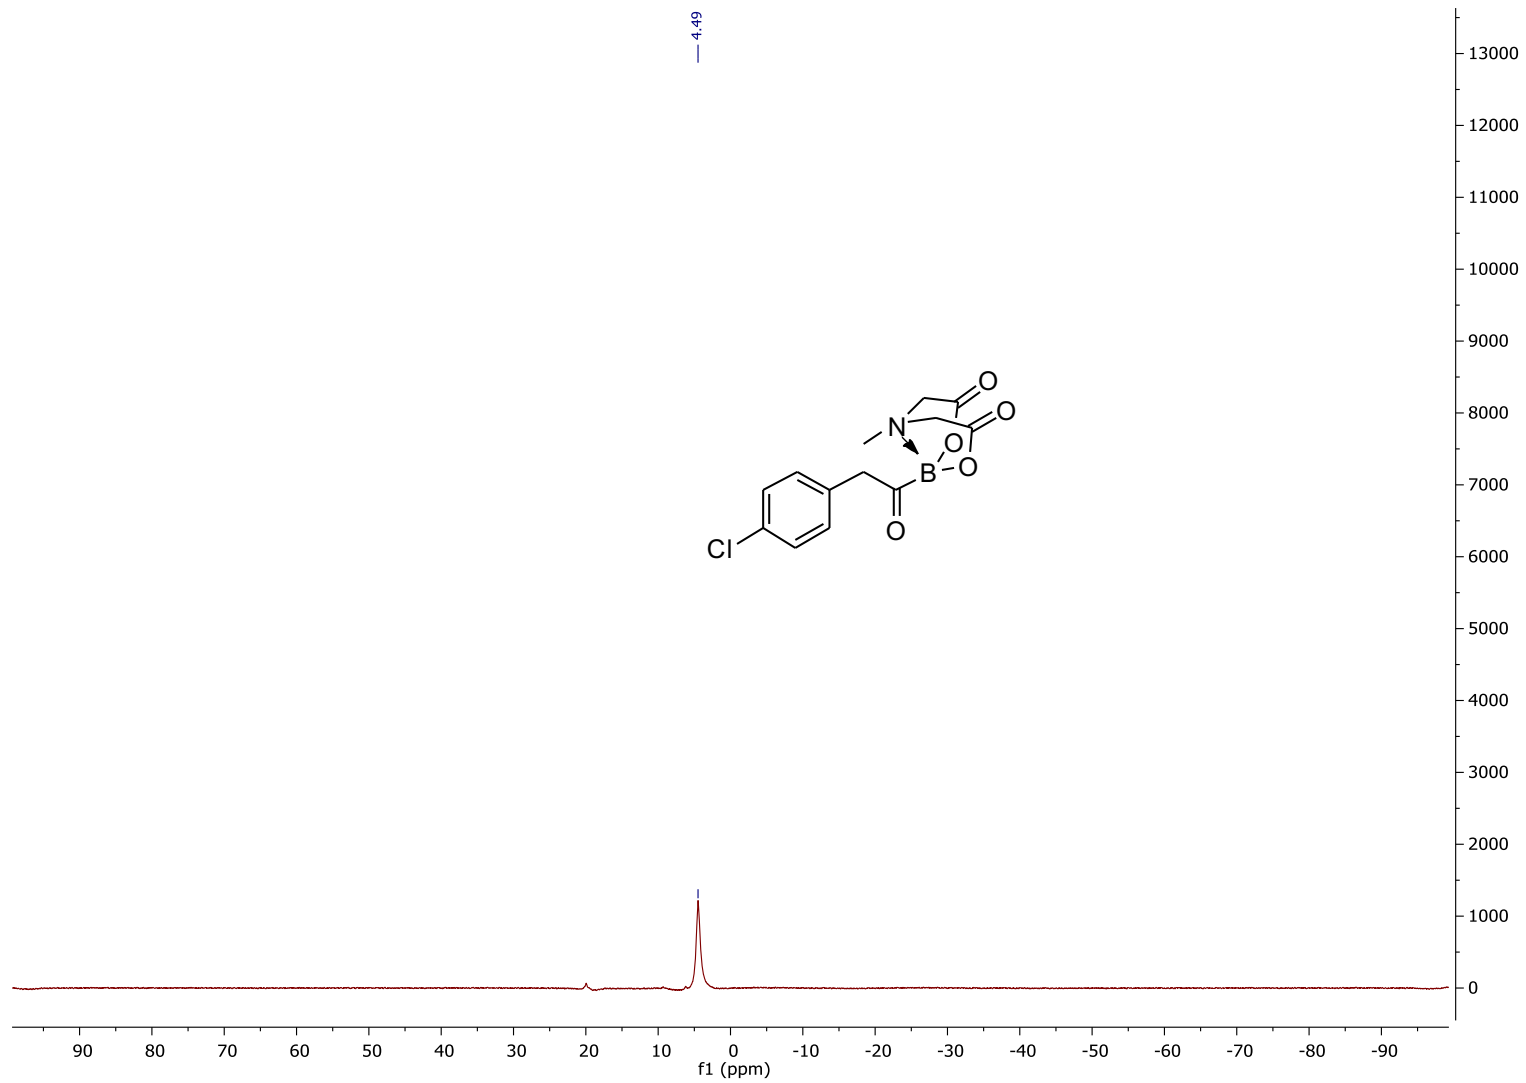

<sup>1</sup>H NMR, compound 5e

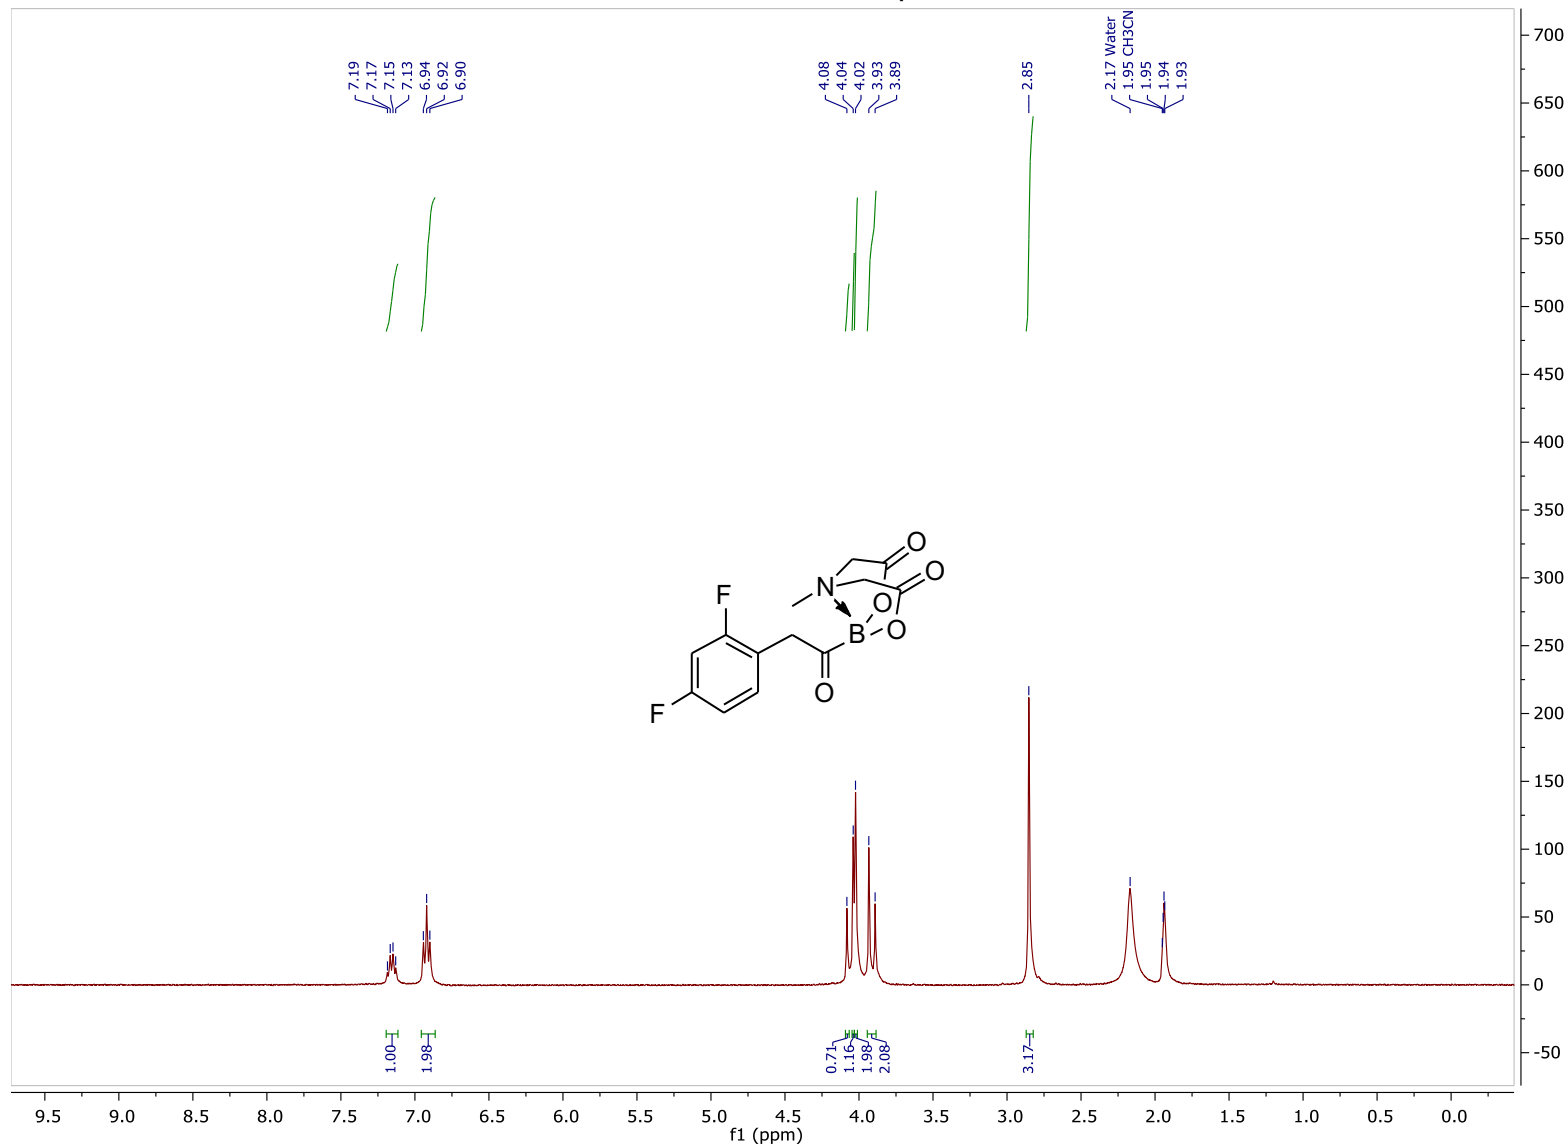

<sup>13</sup>C NMR, compound 5e

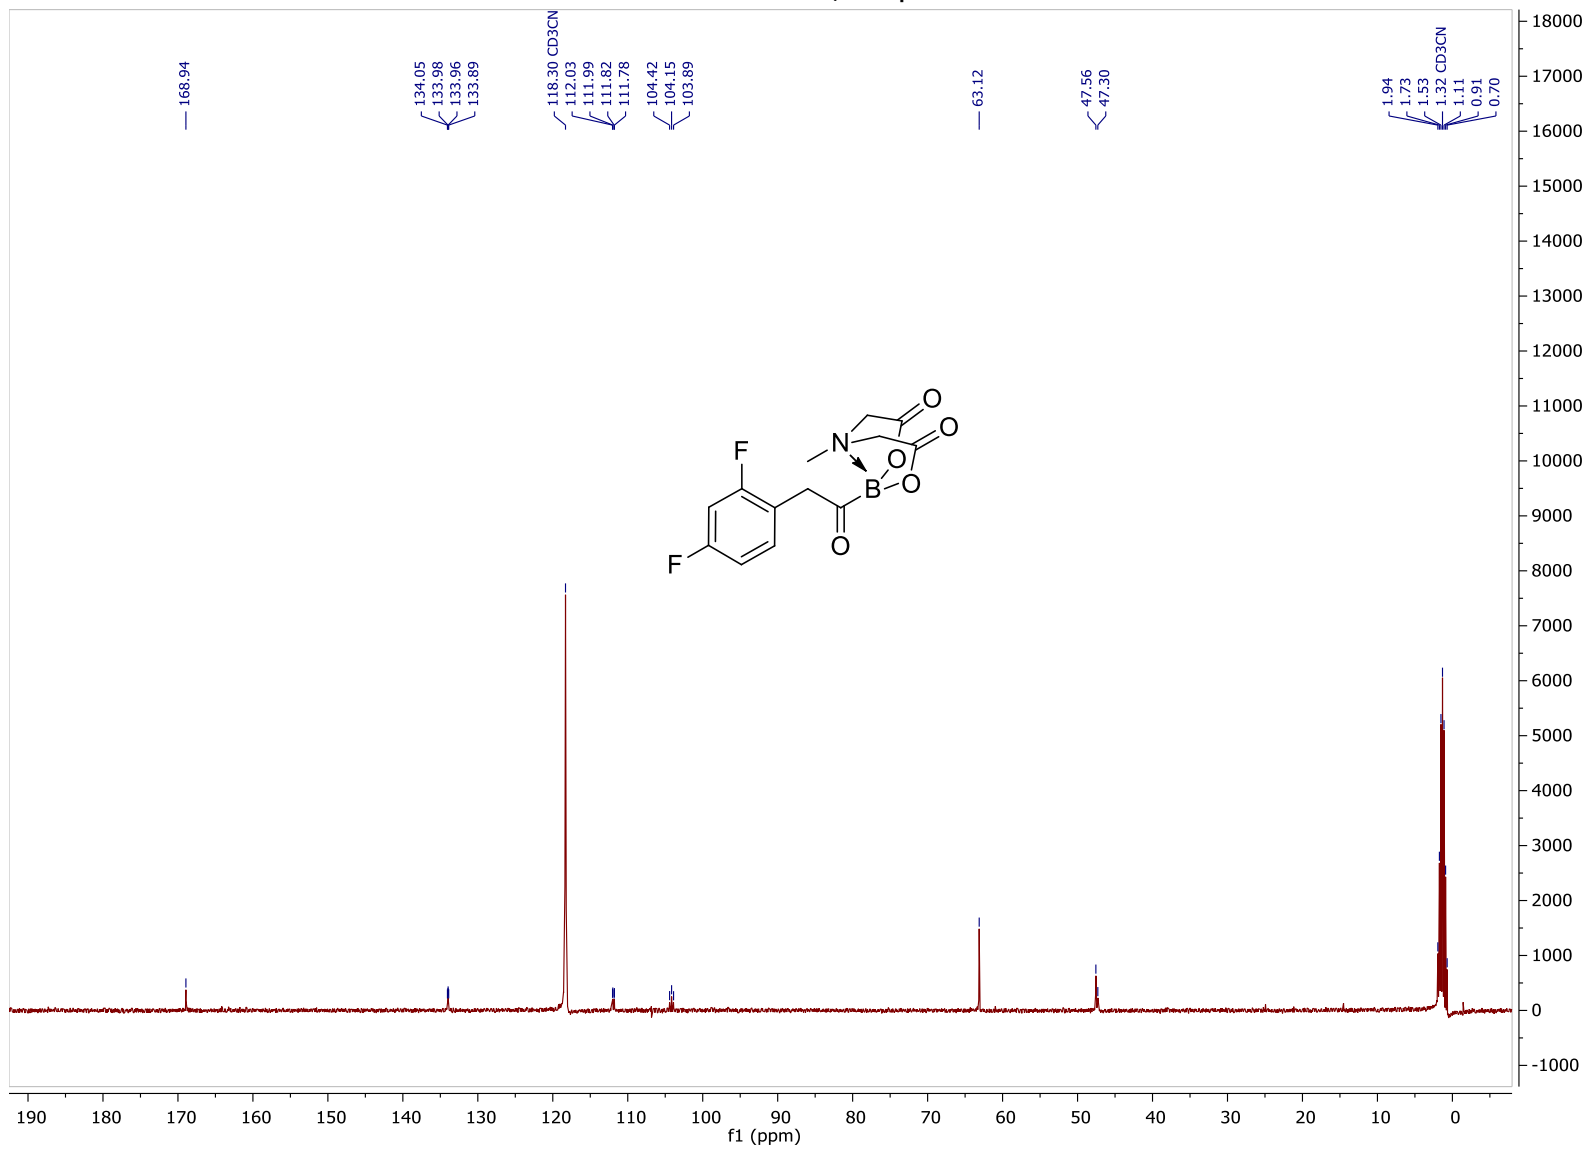



<sup>11</sup>B NMR, compound 5e

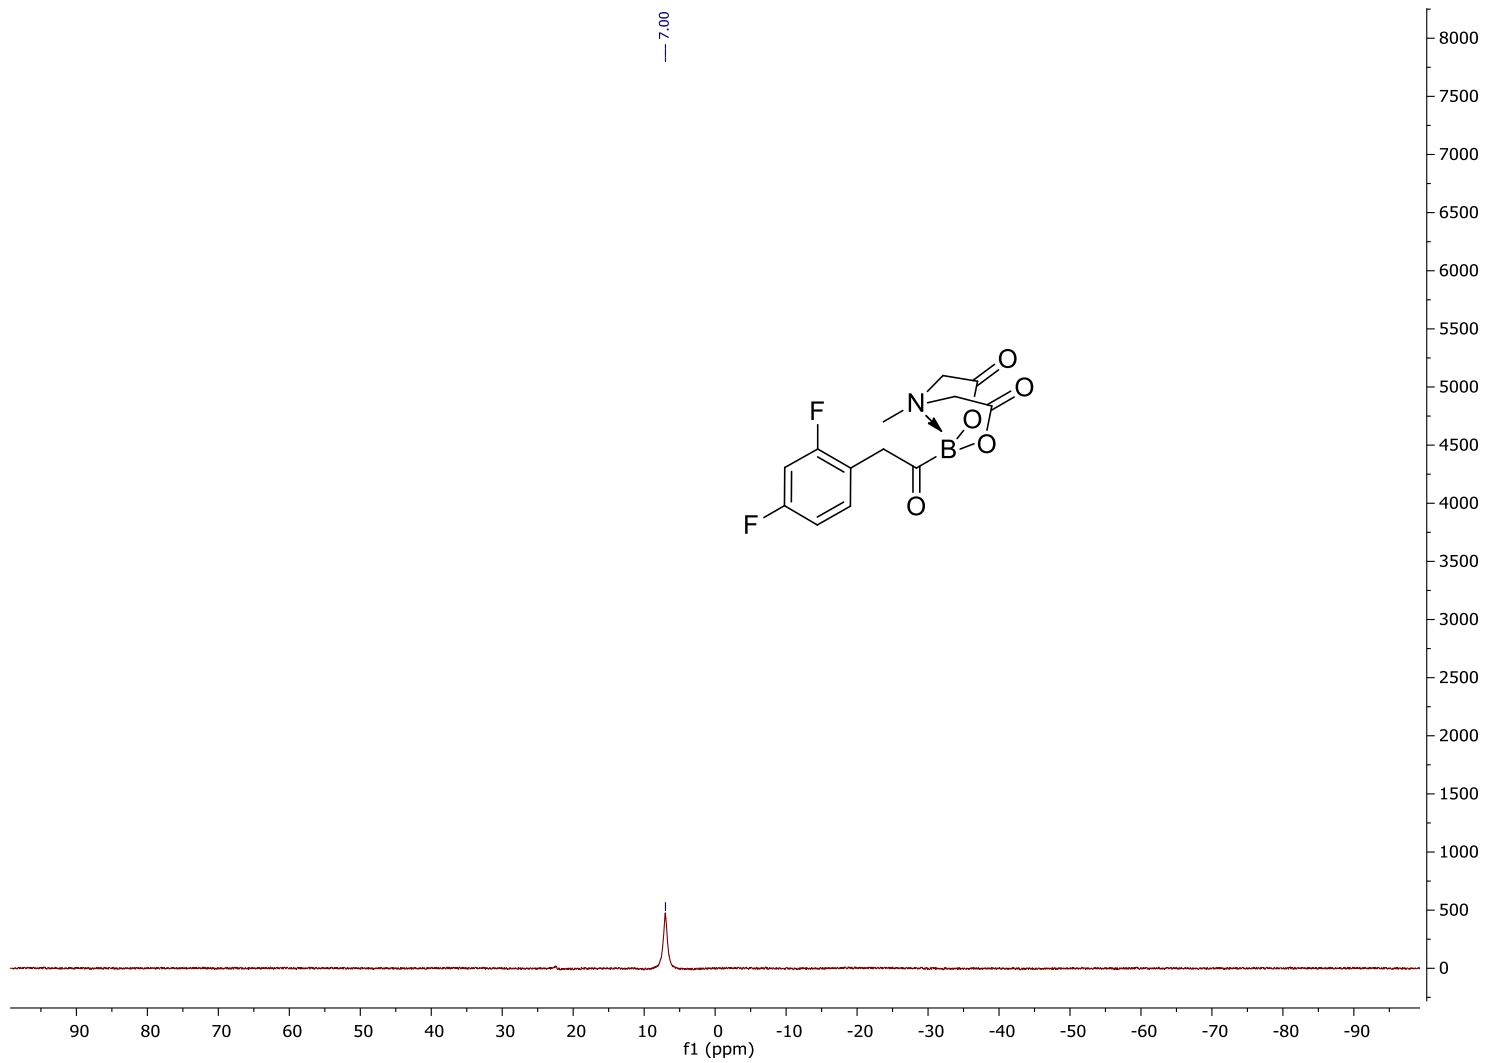

<sup>19</sup>F NMR, compound 5e

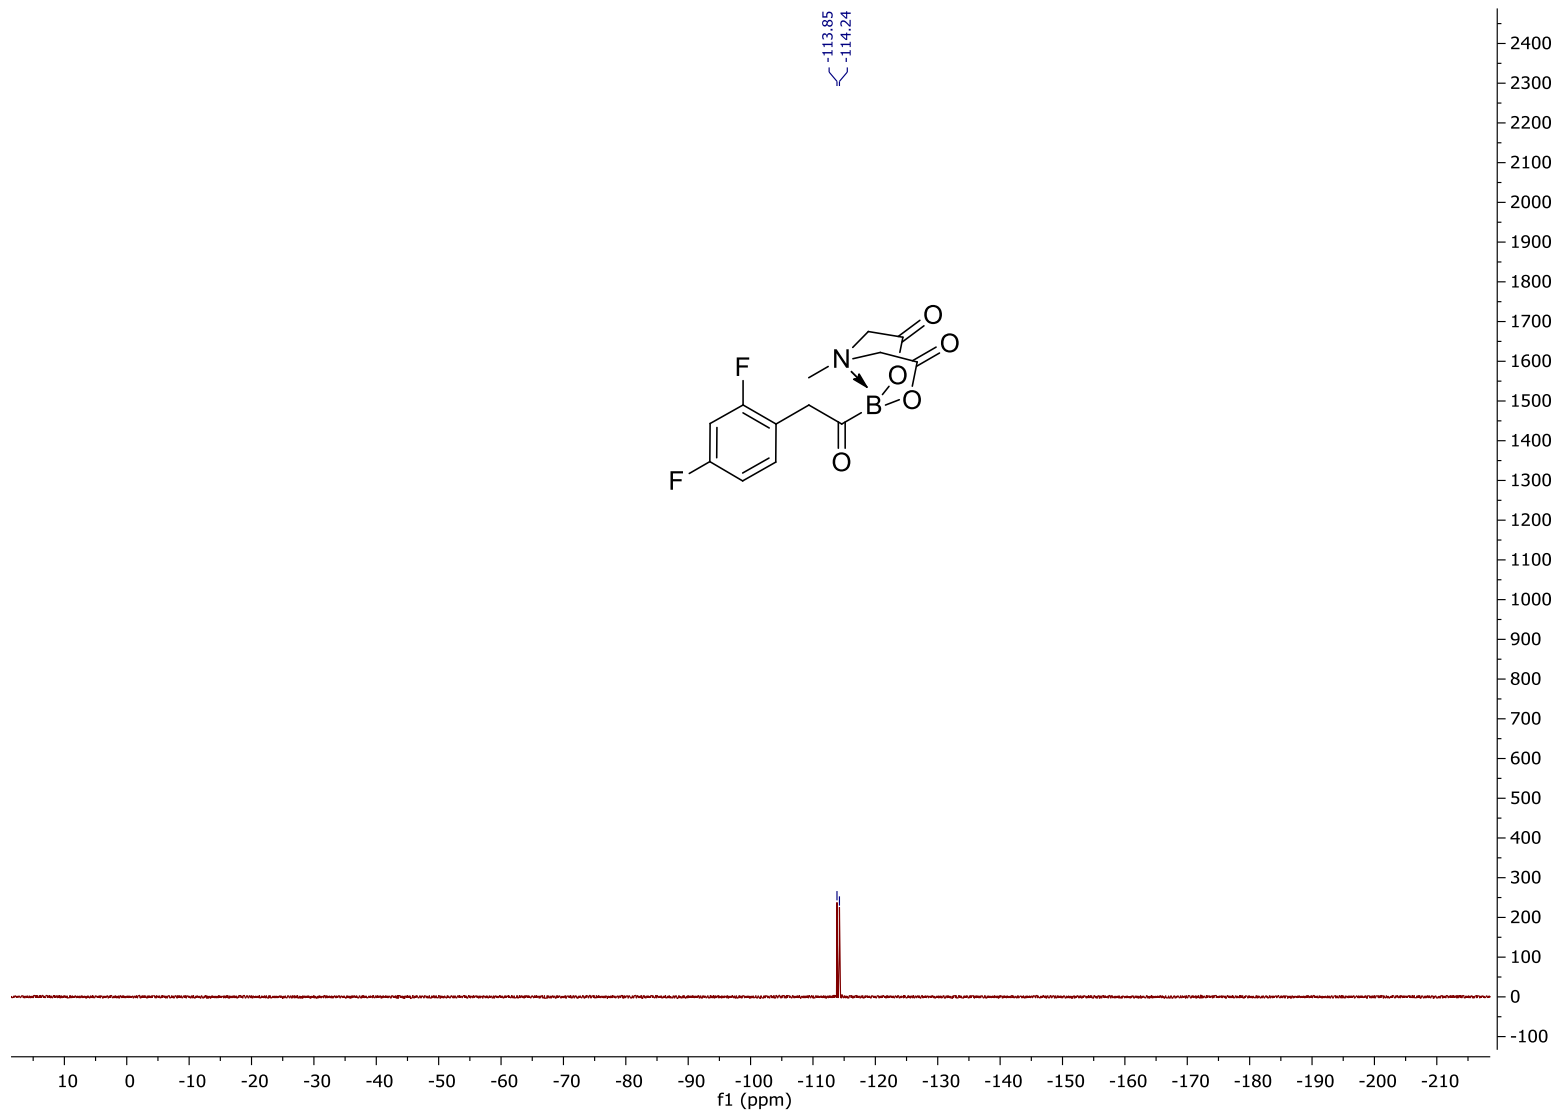

<sup>1</sup>H NMR, compound 5f

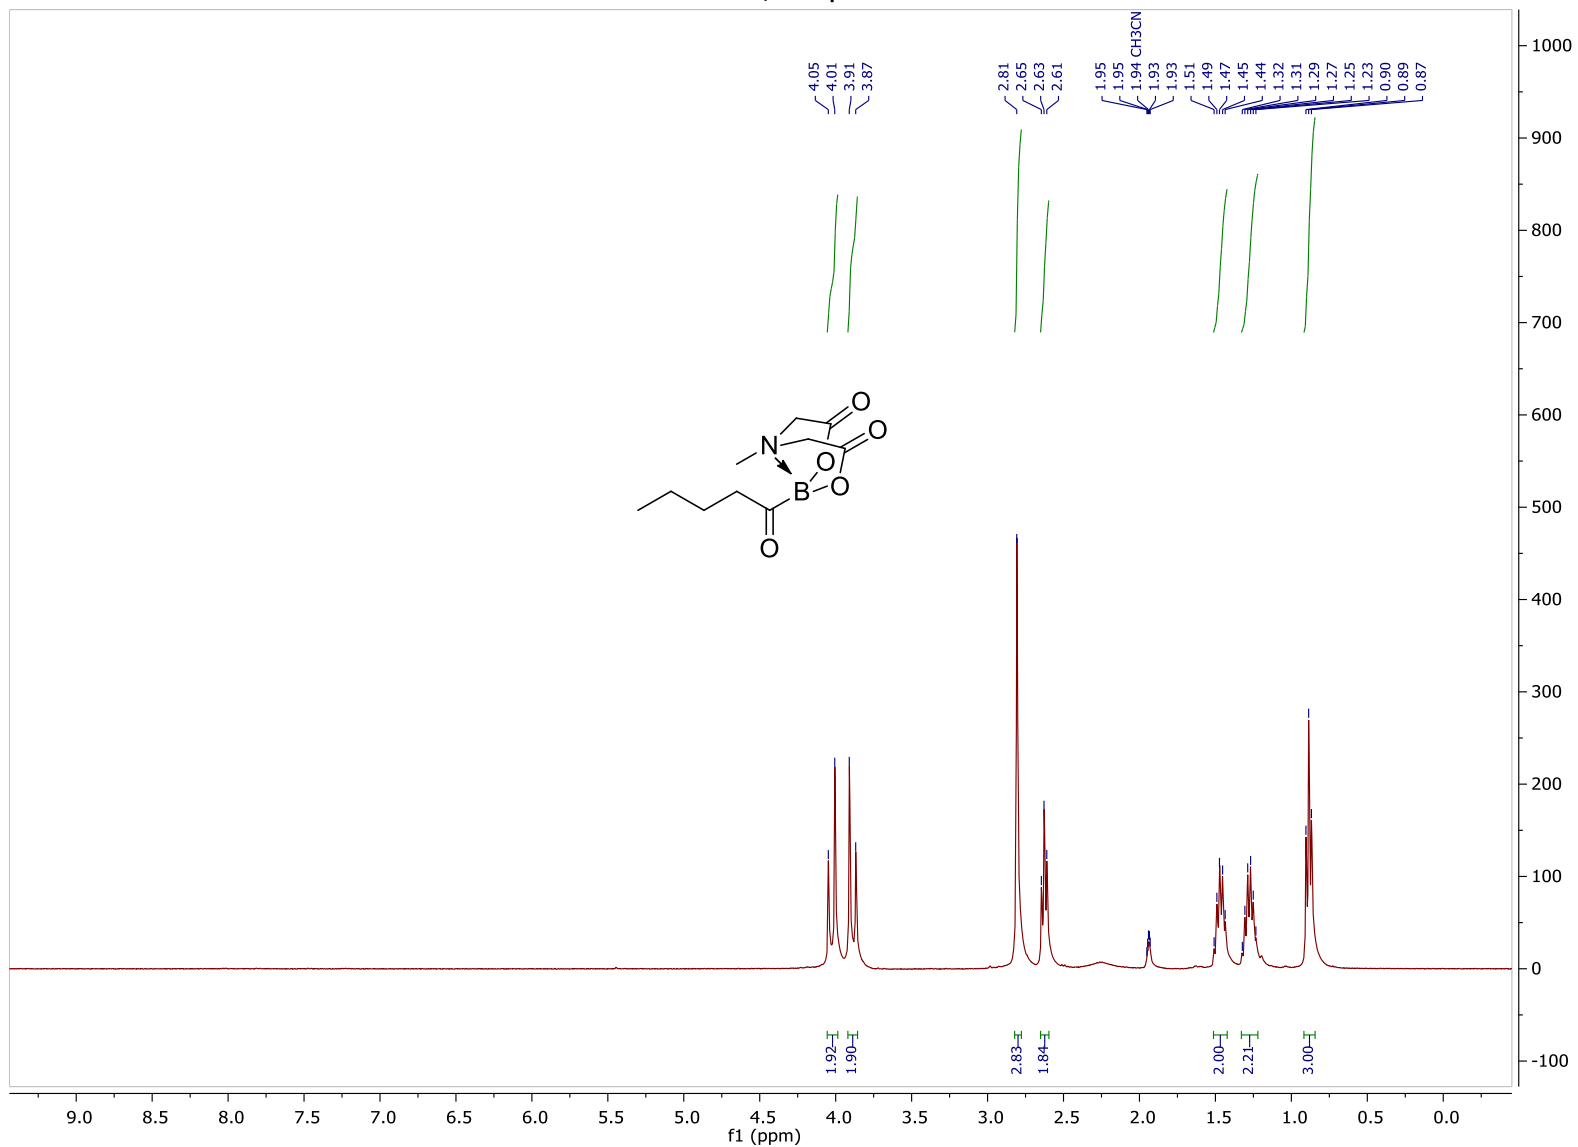

<sup>13</sup>C NMR, compound 5f

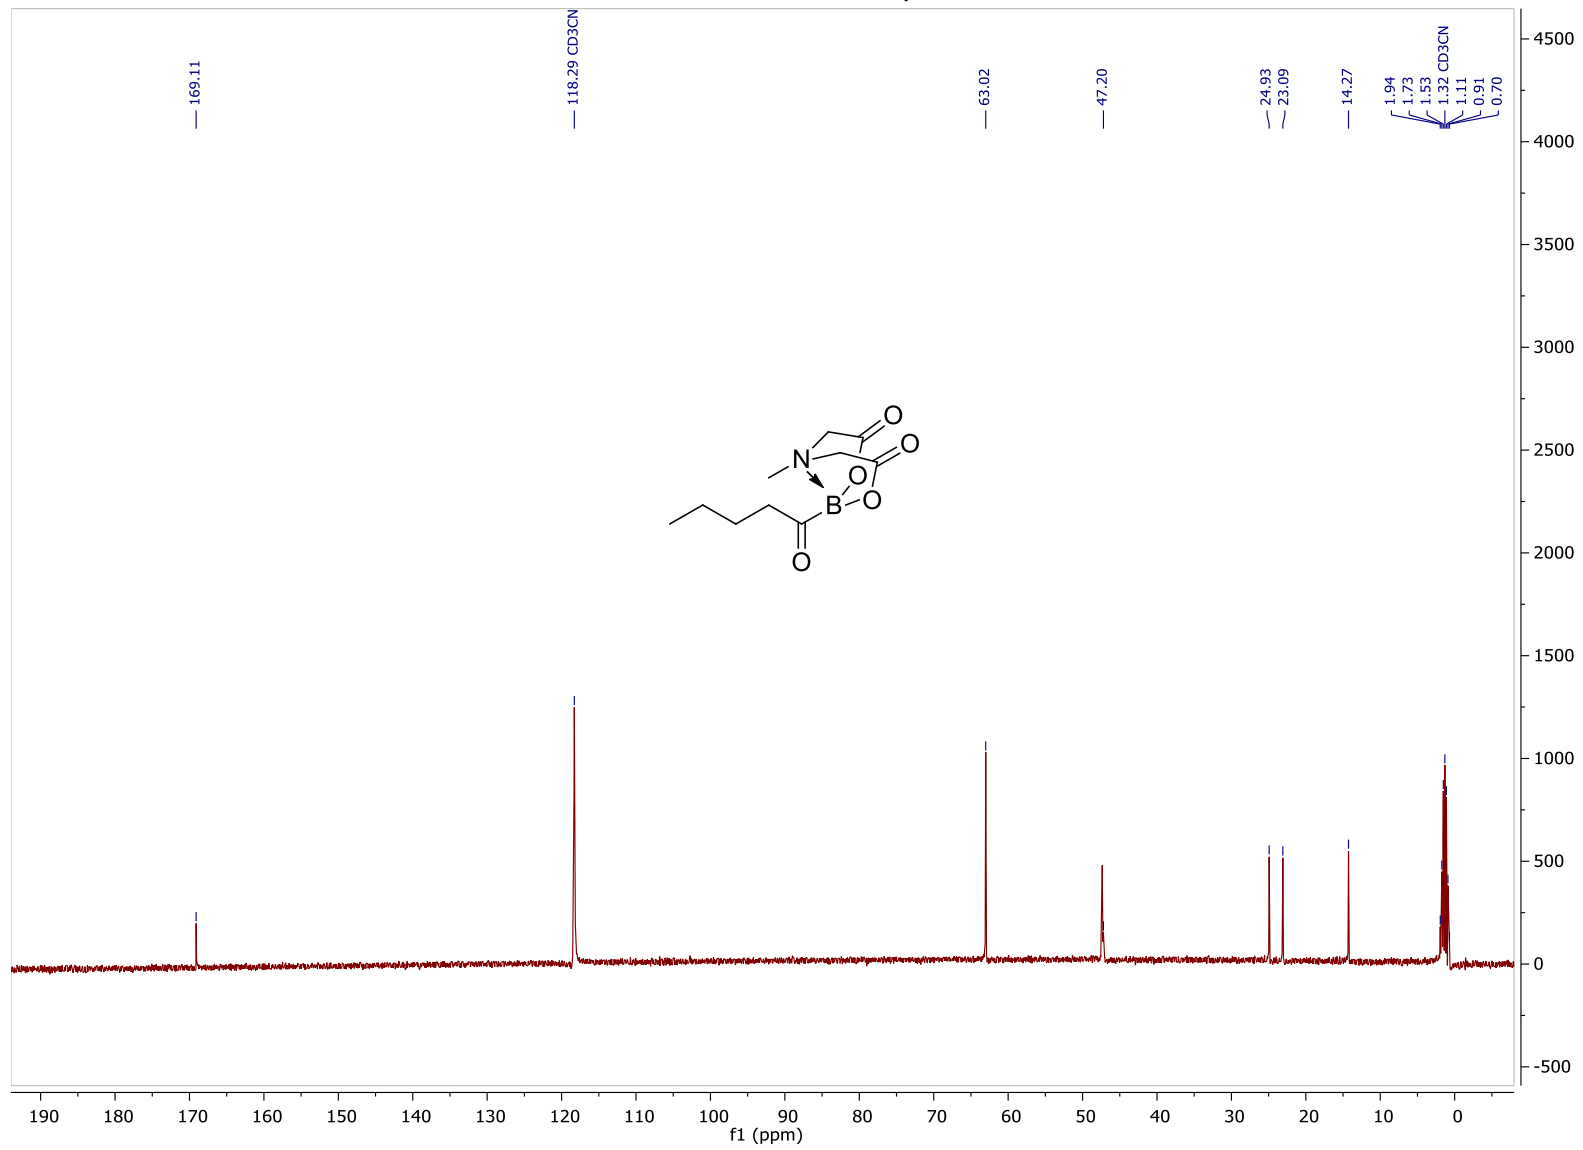

<sup>11</sup>B NMR, compound 5f

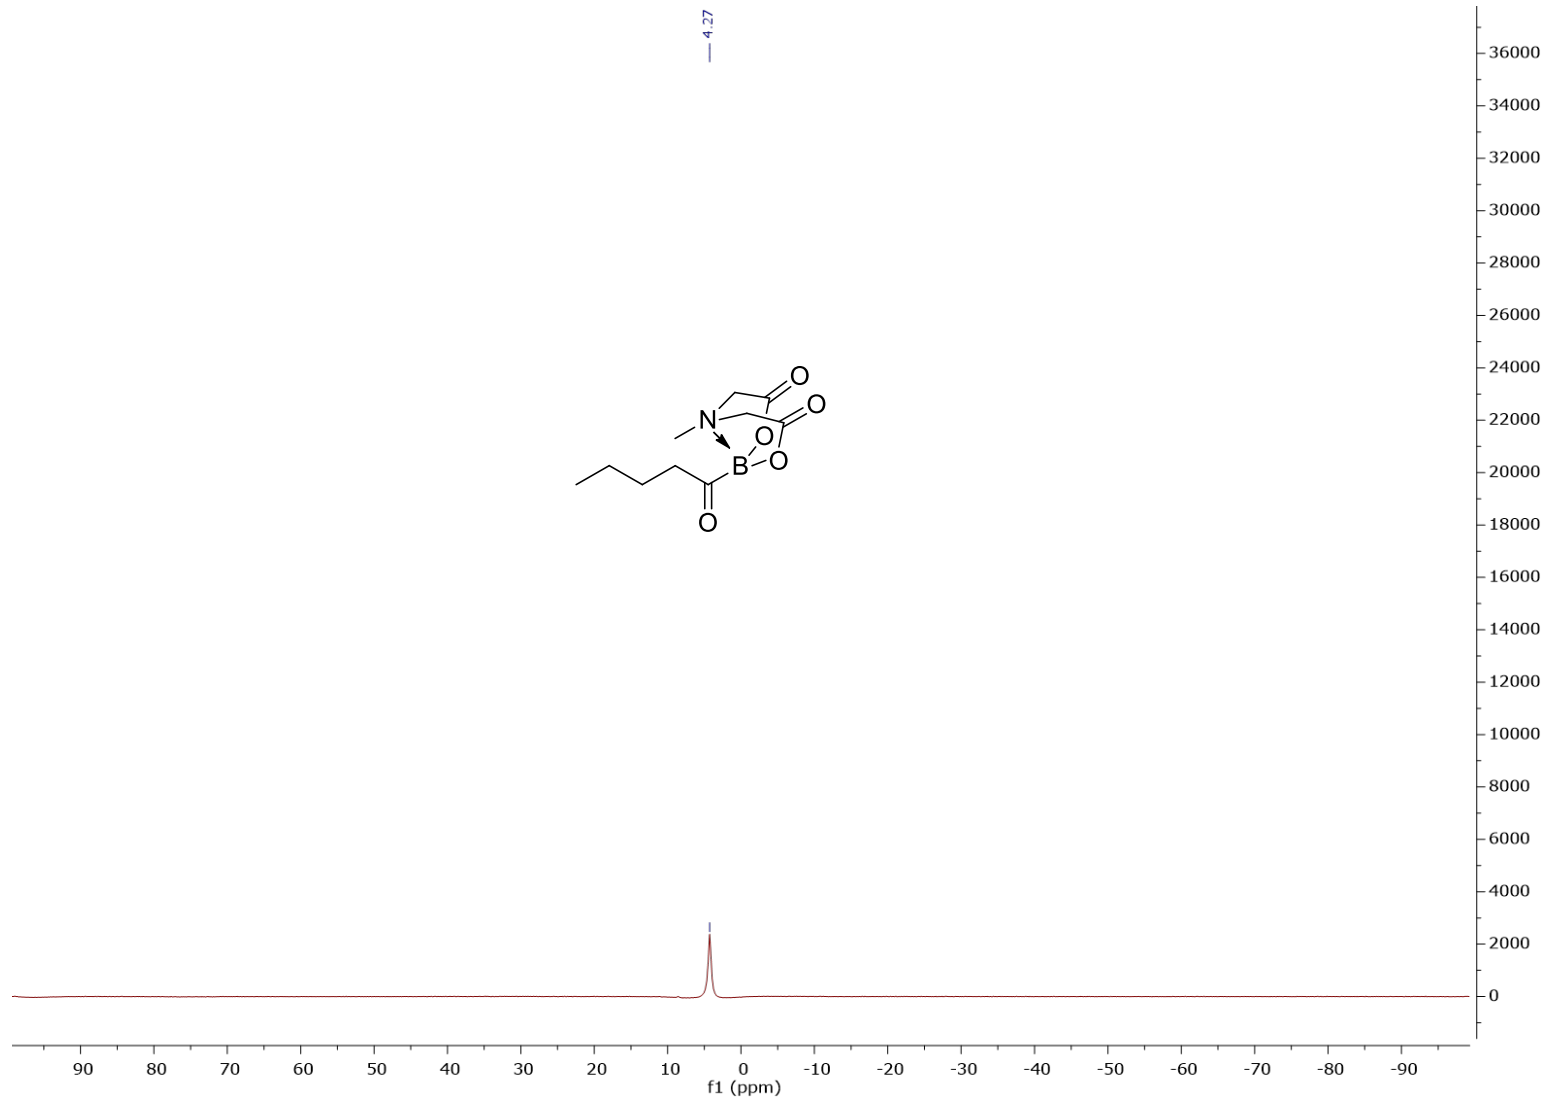

<sup>1</sup>H NMR, compound 5g

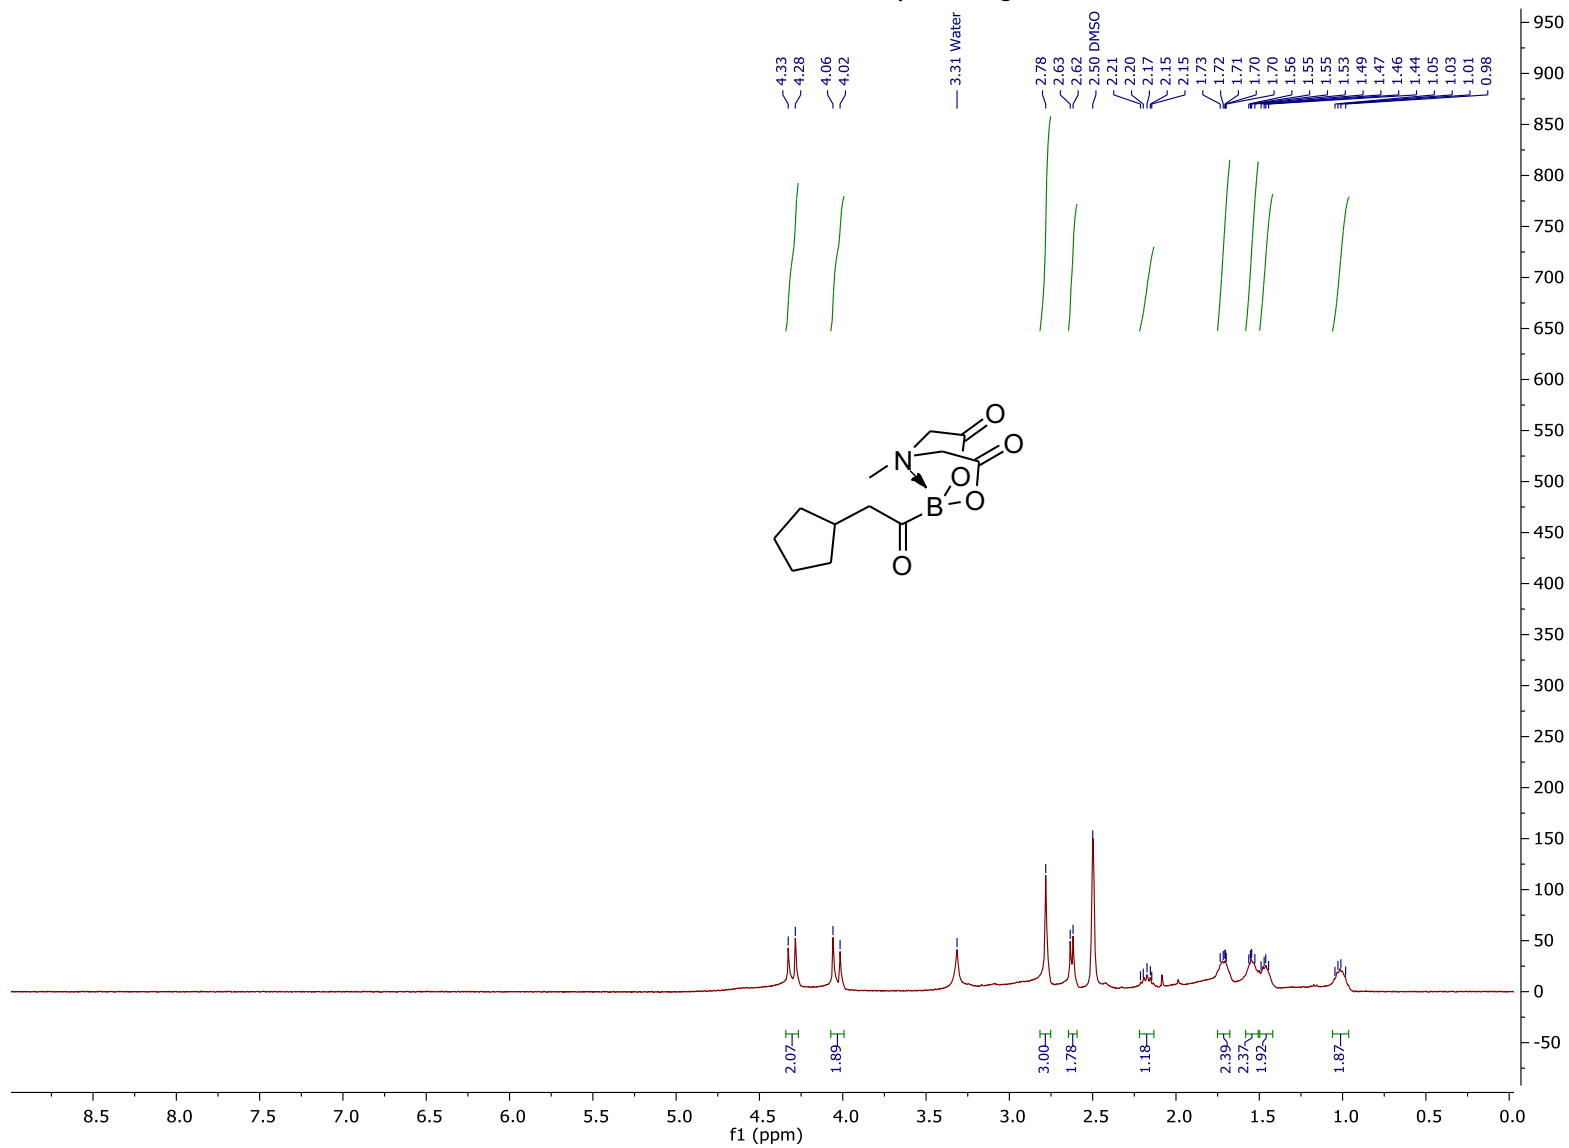

<sup>13</sup>C NMR, compound 5g

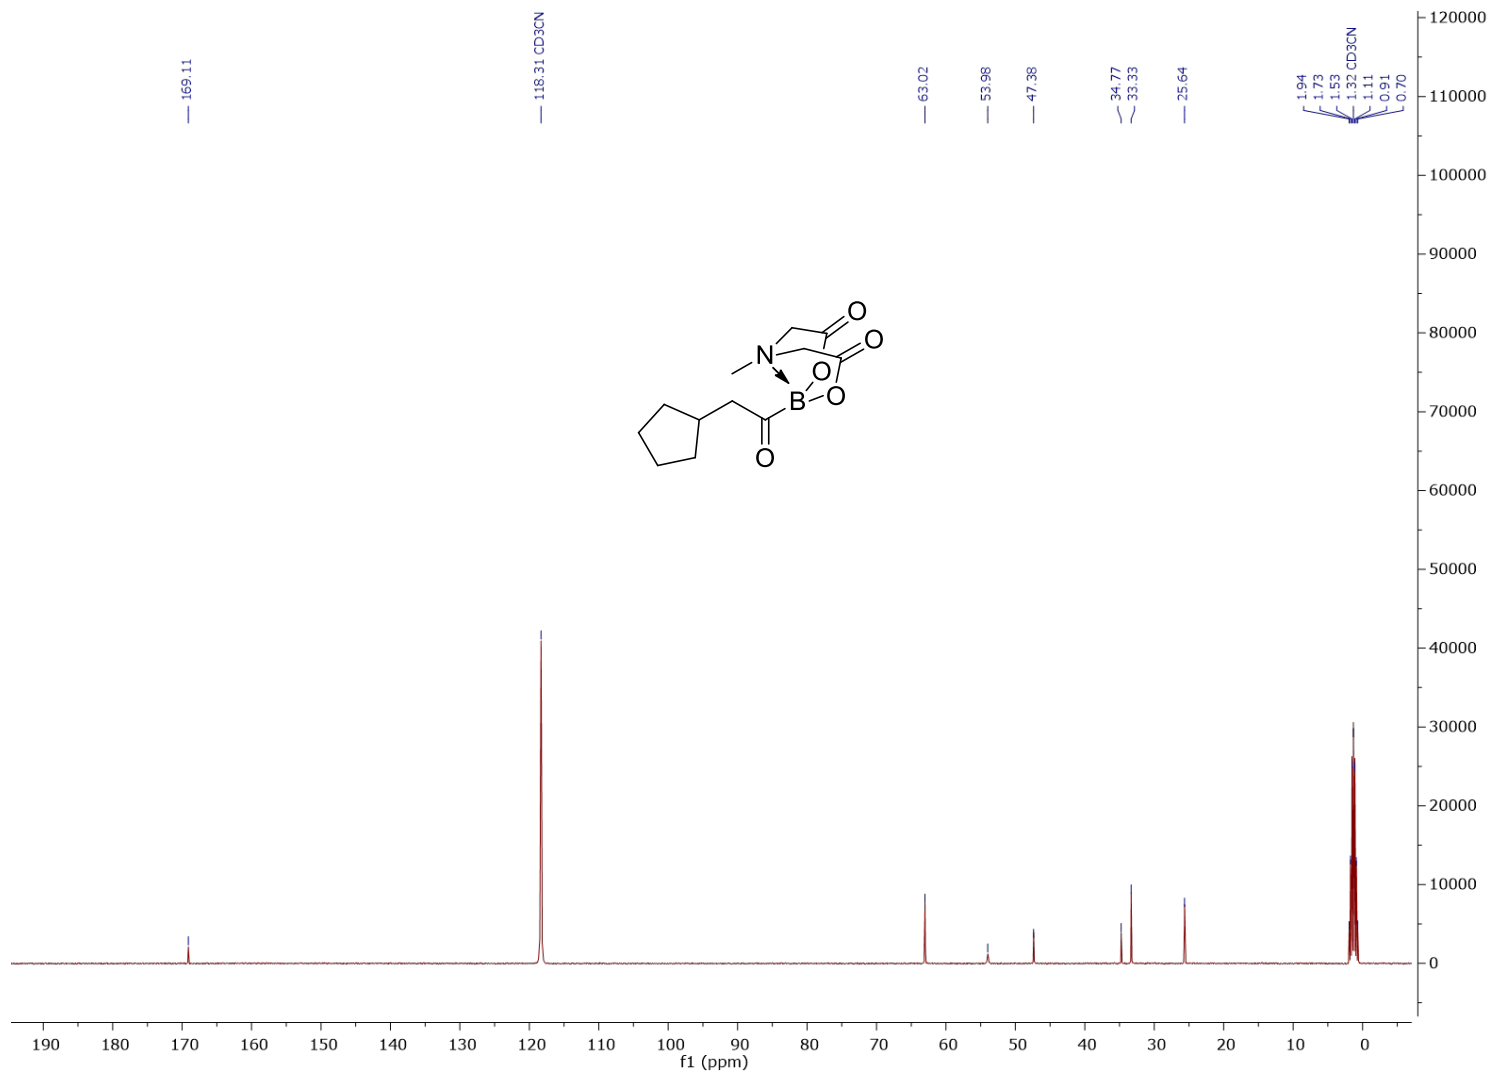

<sup>11</sup>B NMR, compound 5g

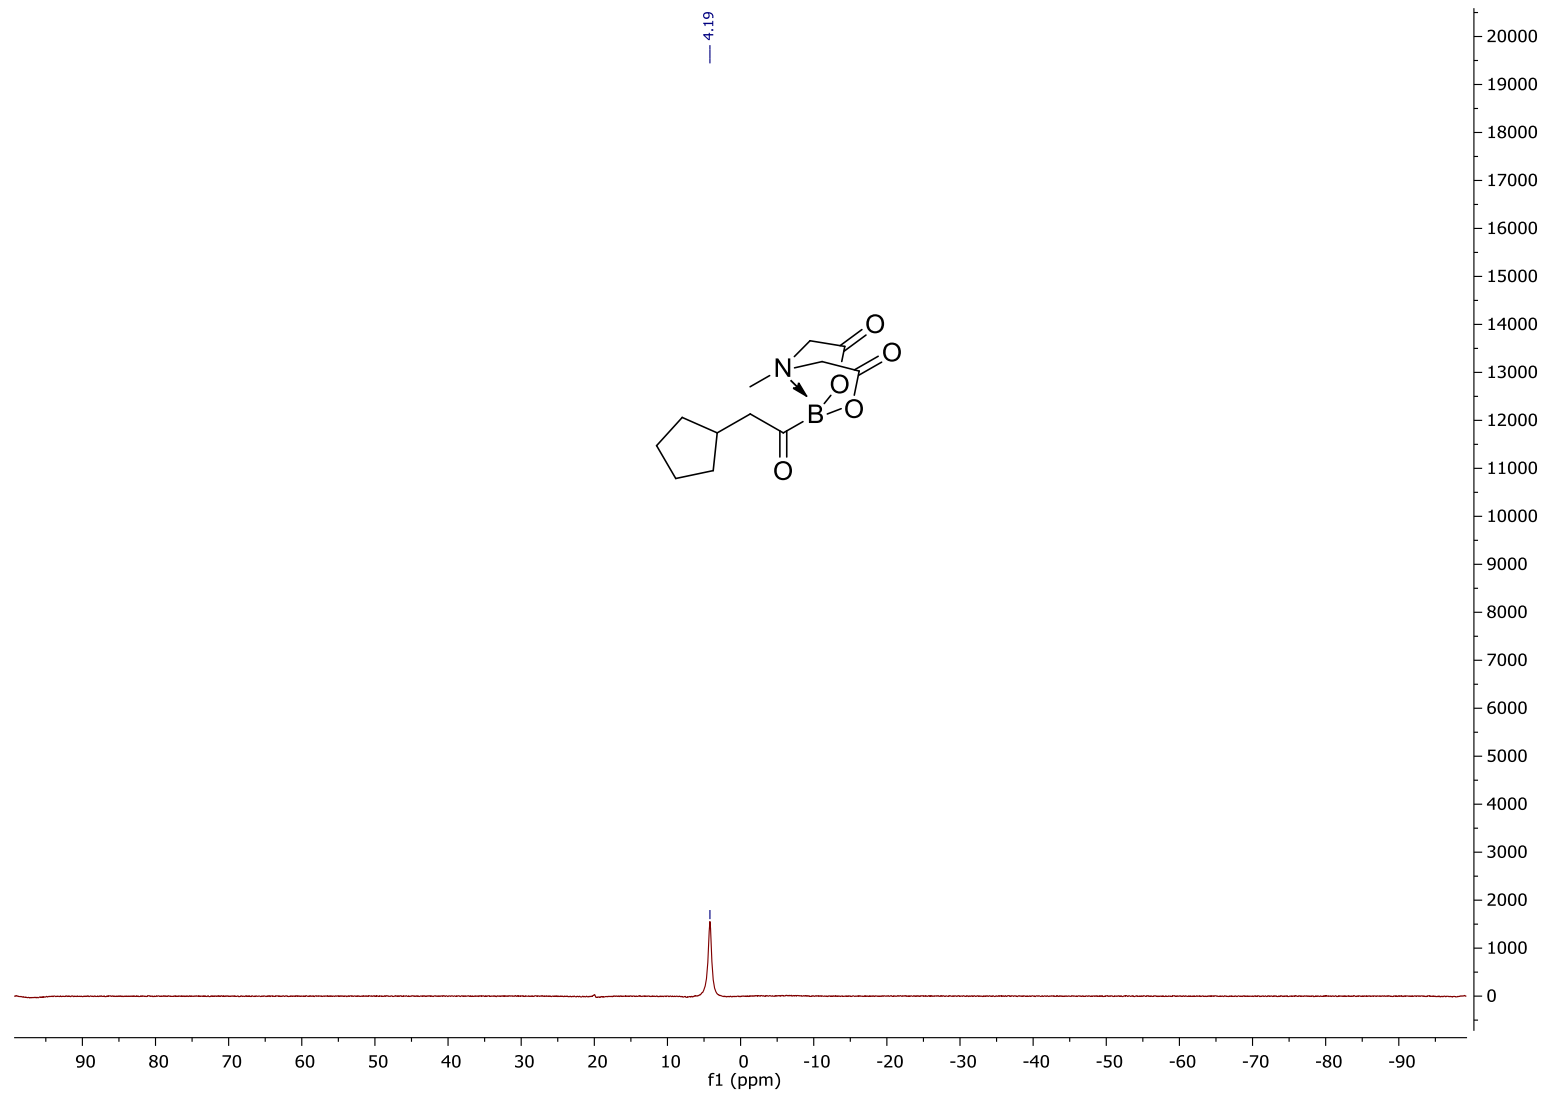



<sup>1</sup>H NMR, compound 5h

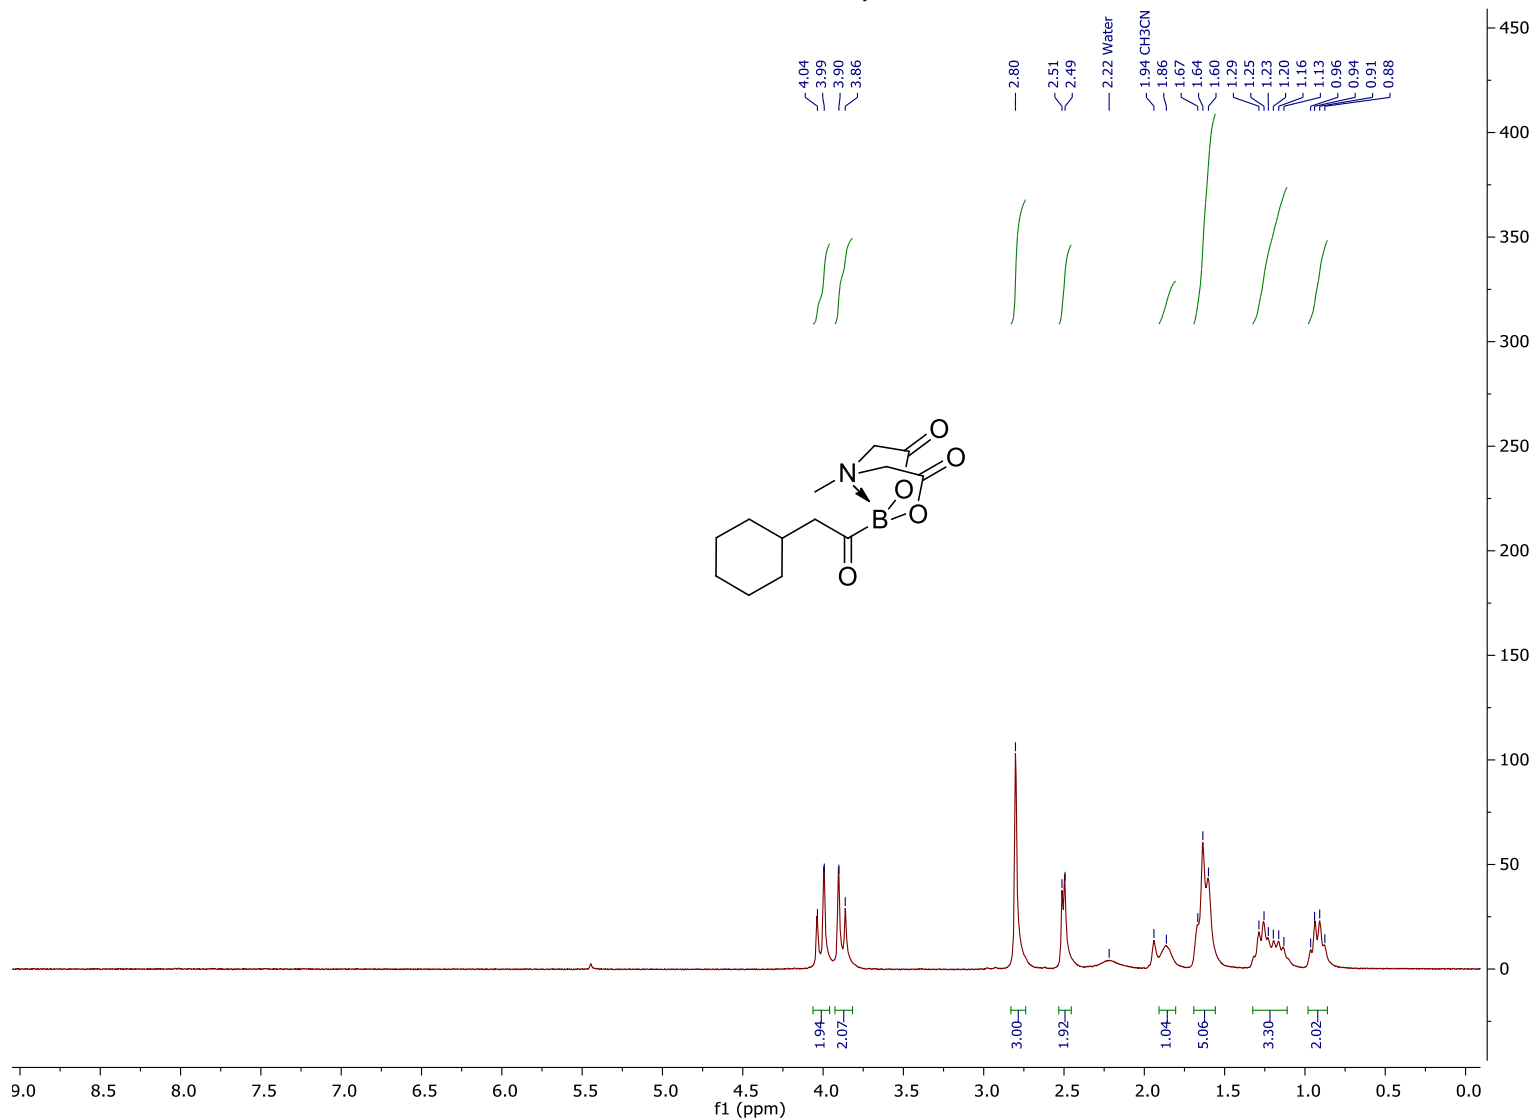

<sup>13</sup>C NMR, compound 5h

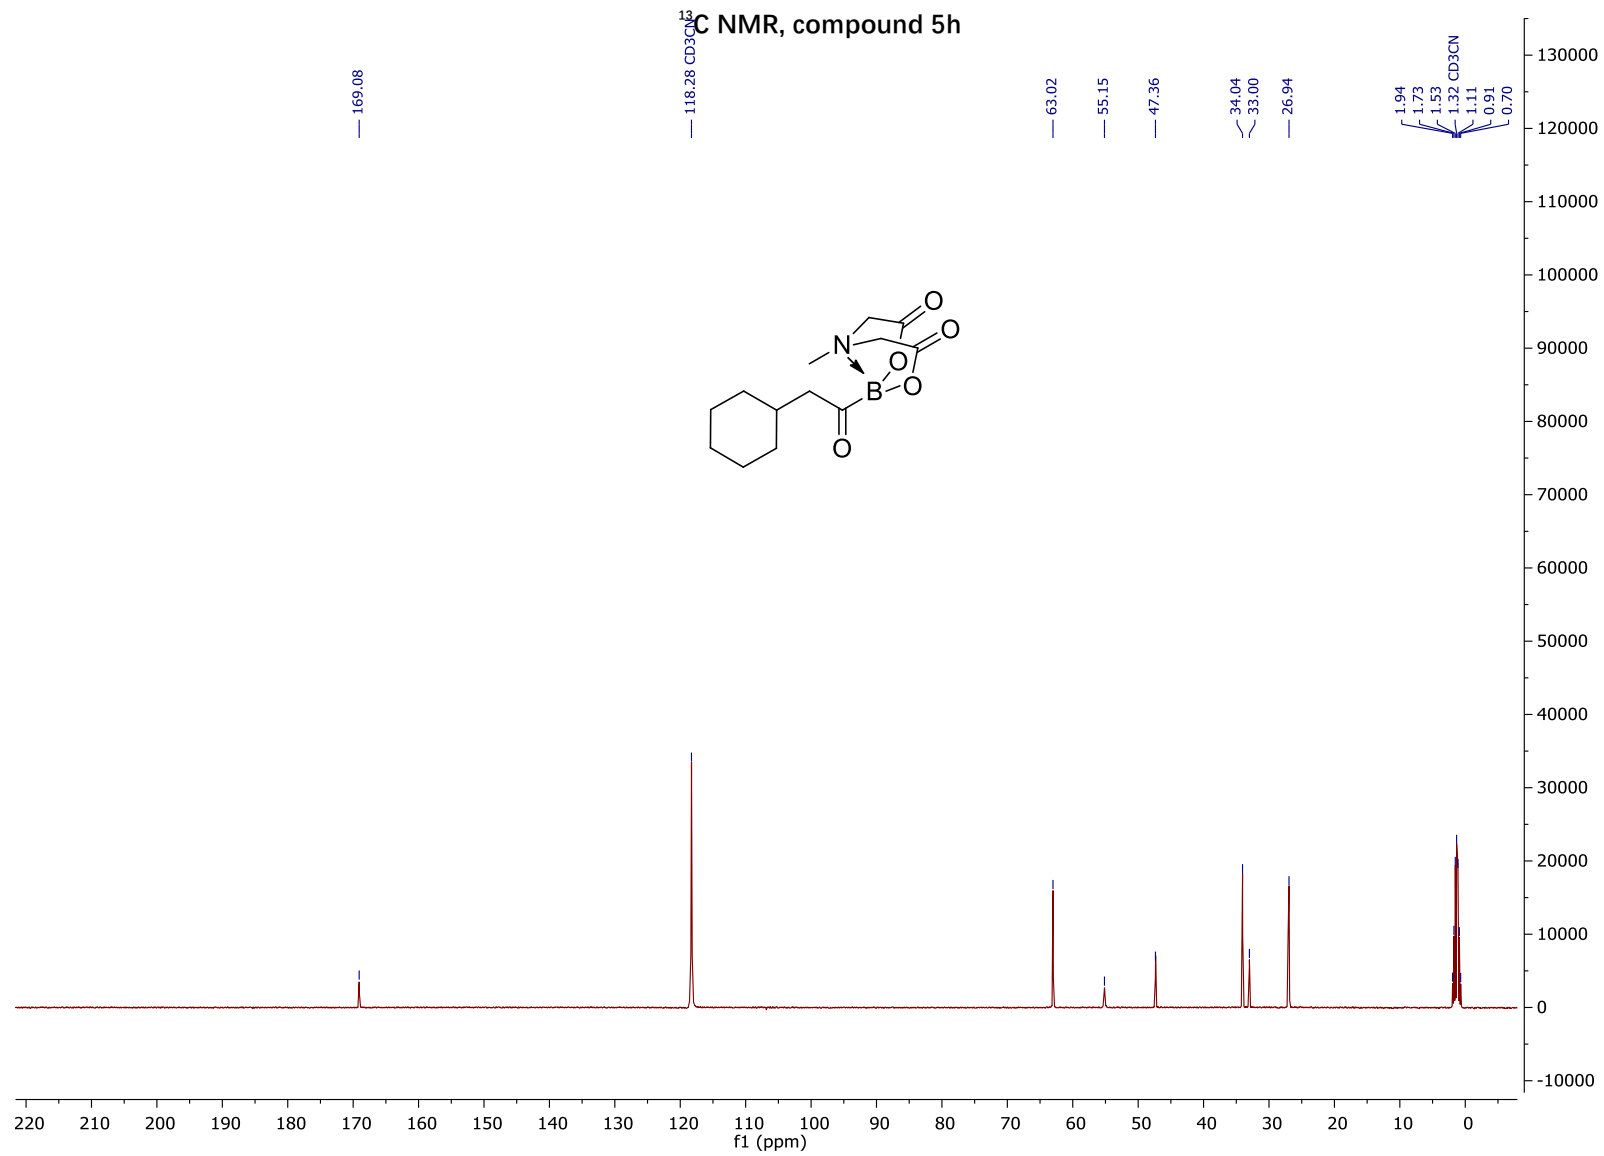



<sup>1</sup>H NMR, compound 5i

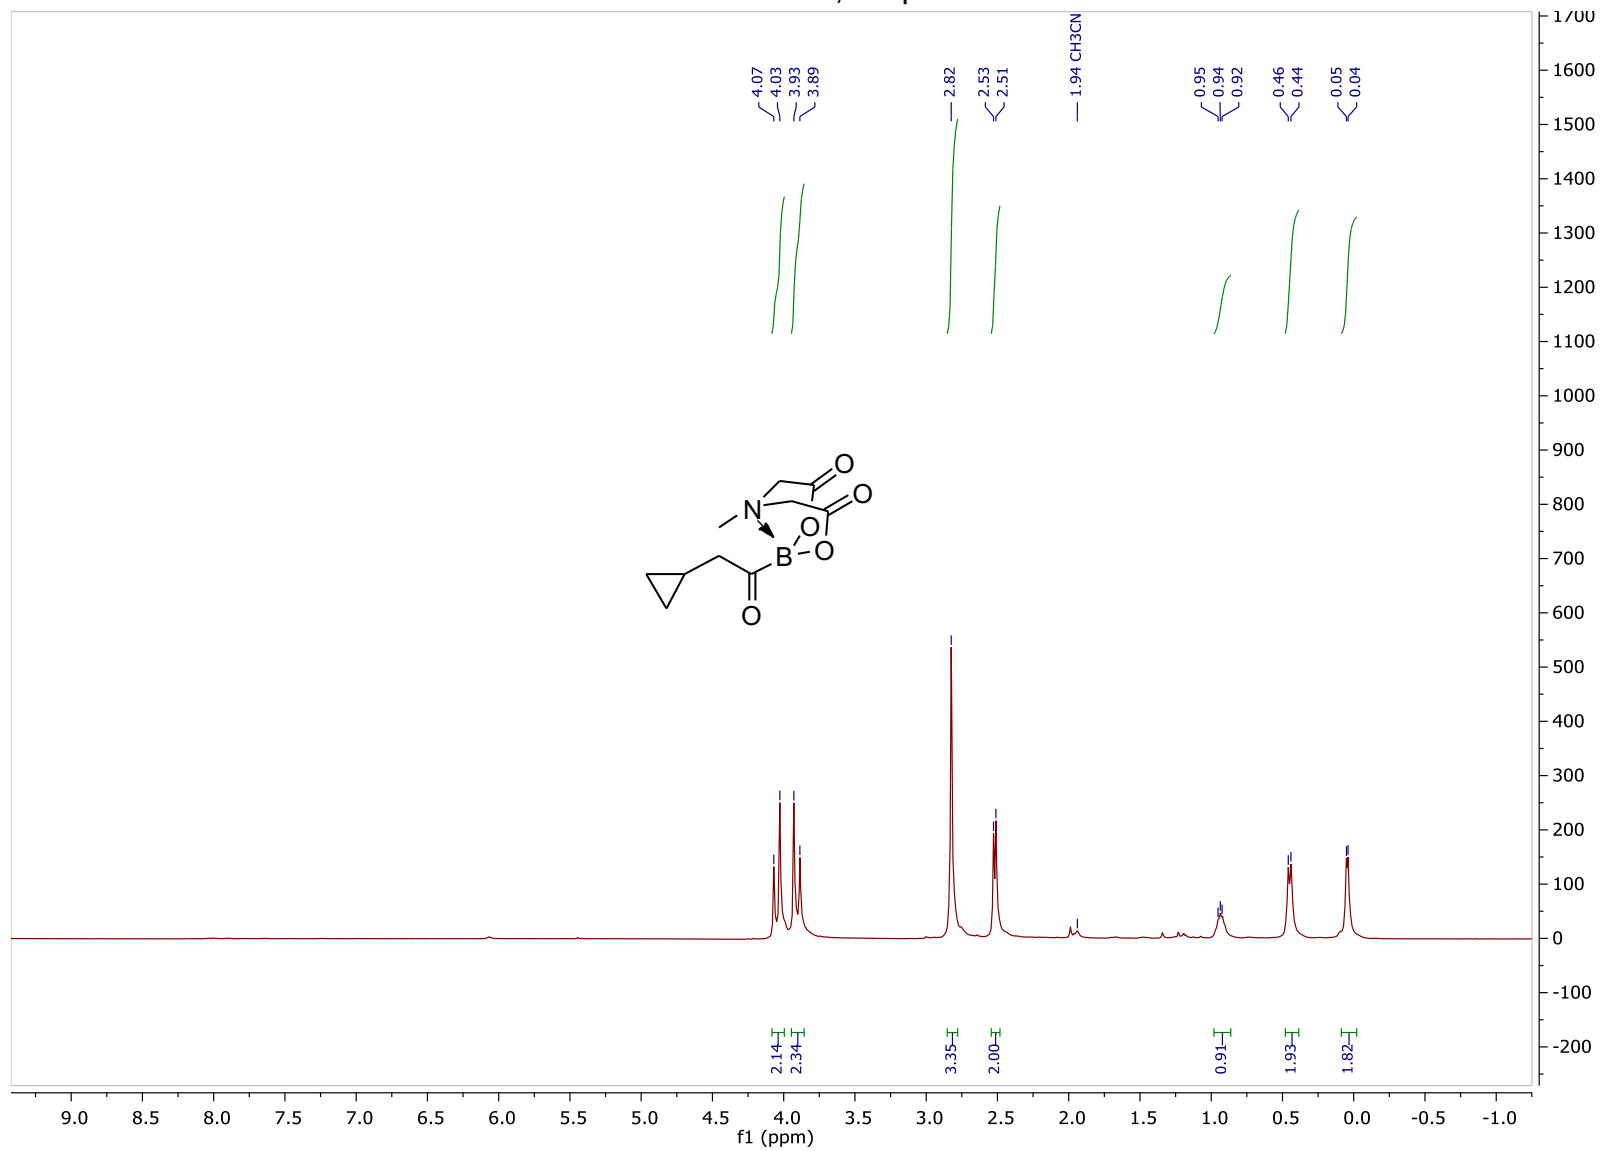

<sup>13</sup>C NMR, compound 5i

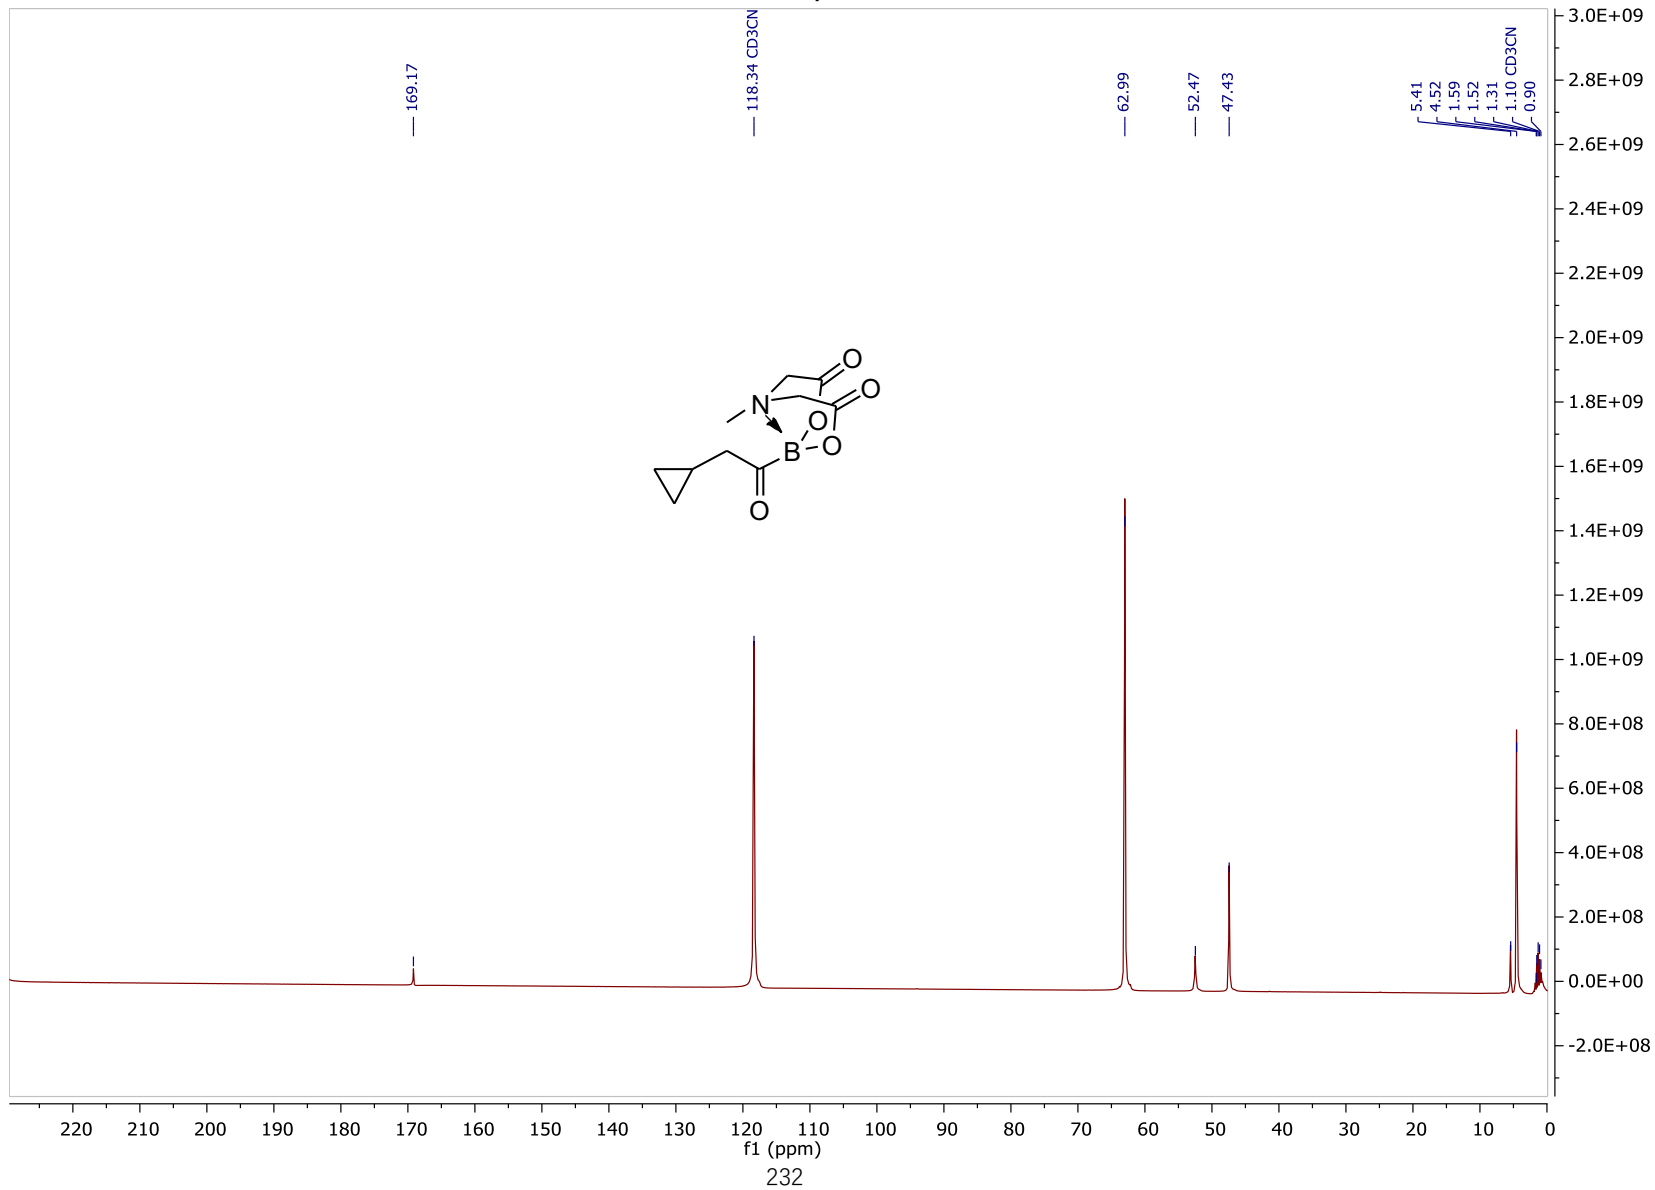

<sup>11</sup>B NMR, compound 5i

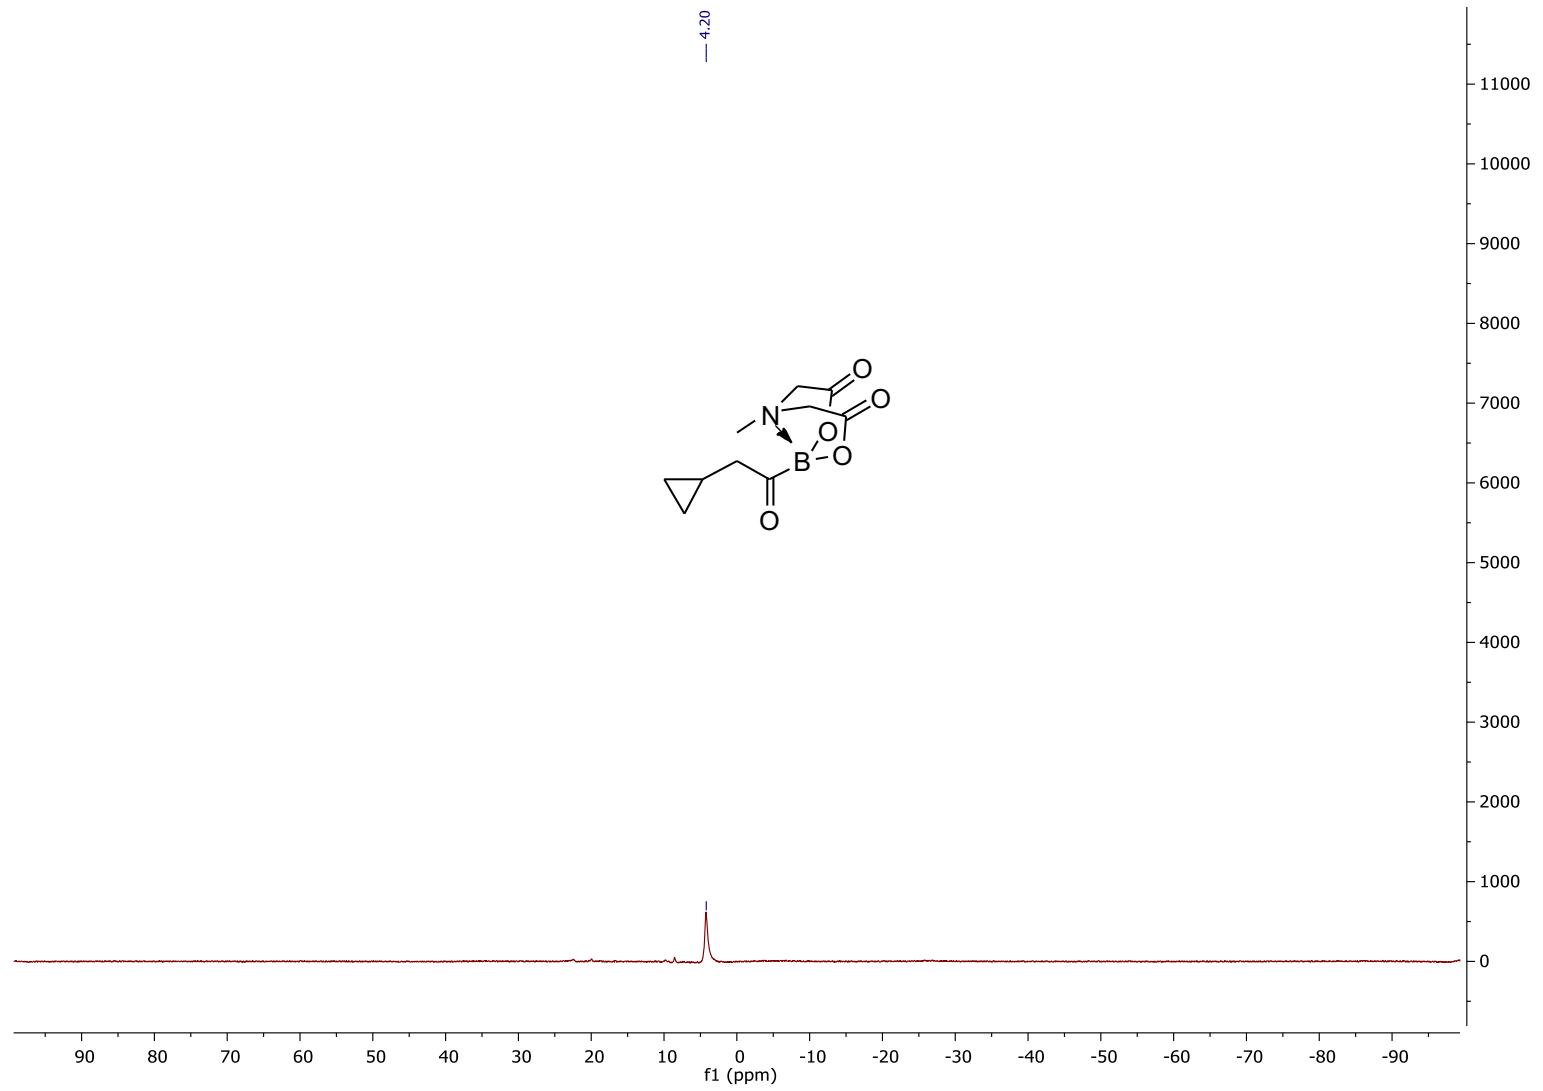

<sup>1</sup>H NMR, compound 5j

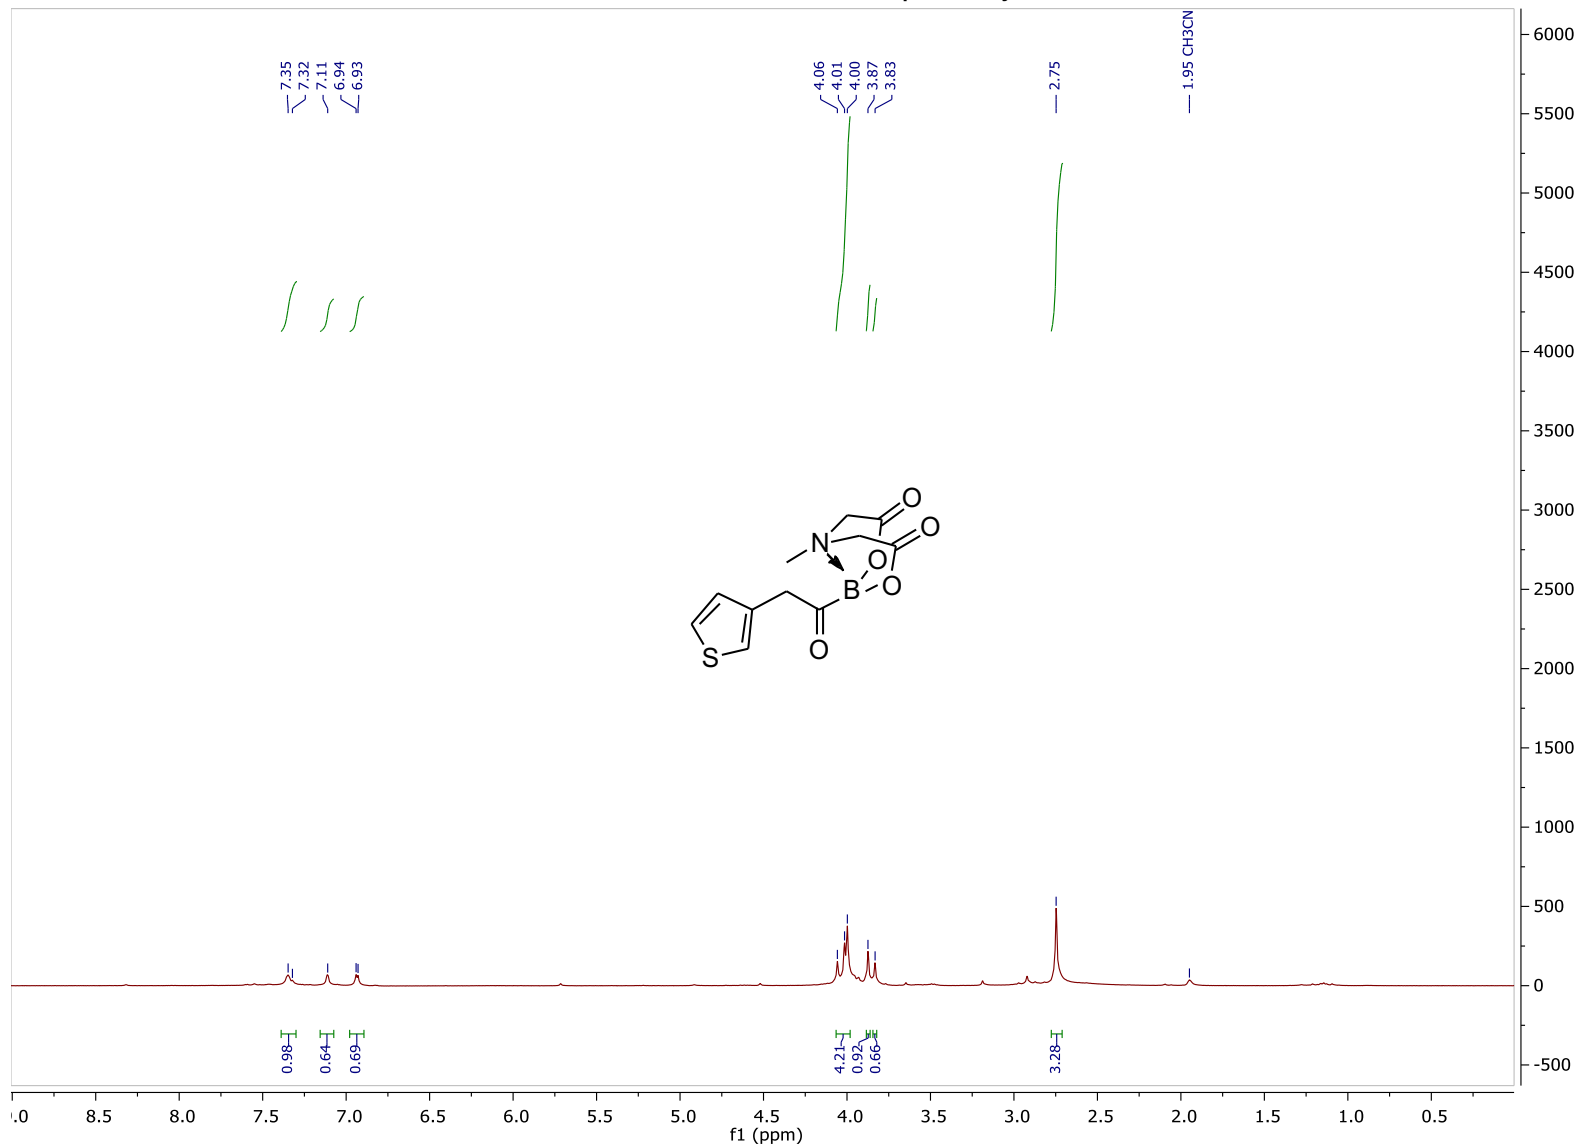

<sup>13</sup>C NMR, compound 5j

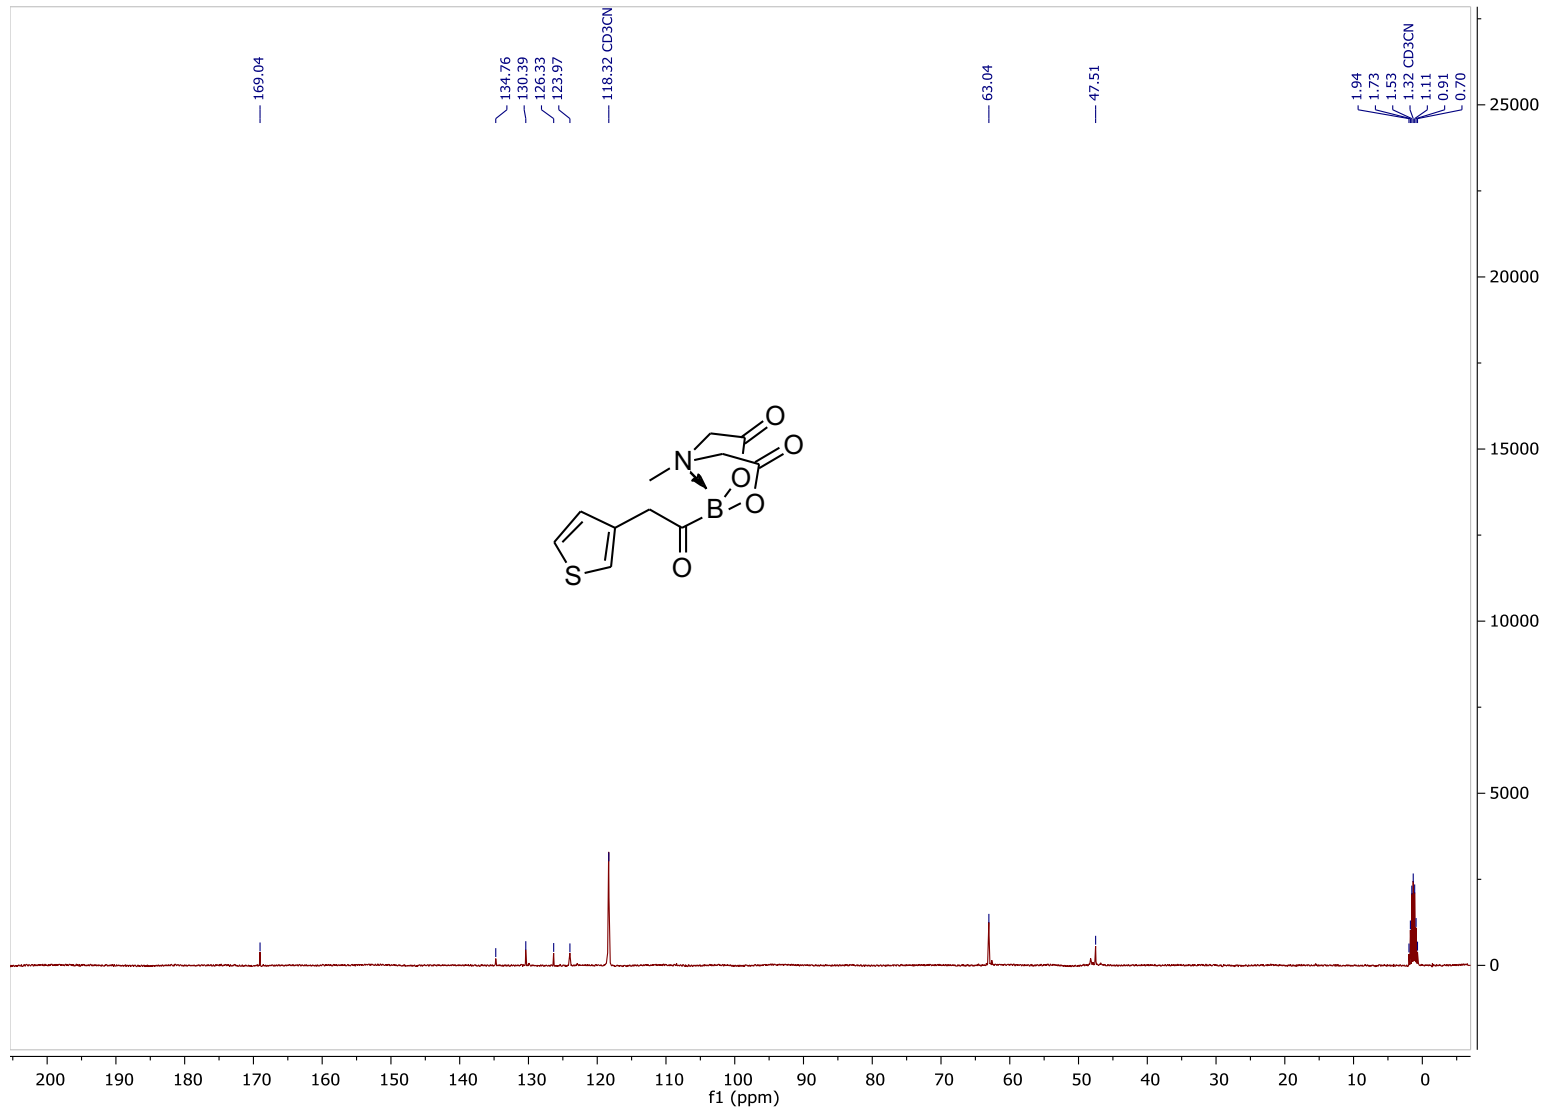



<sup>11</sup>B NMR, compound 5j

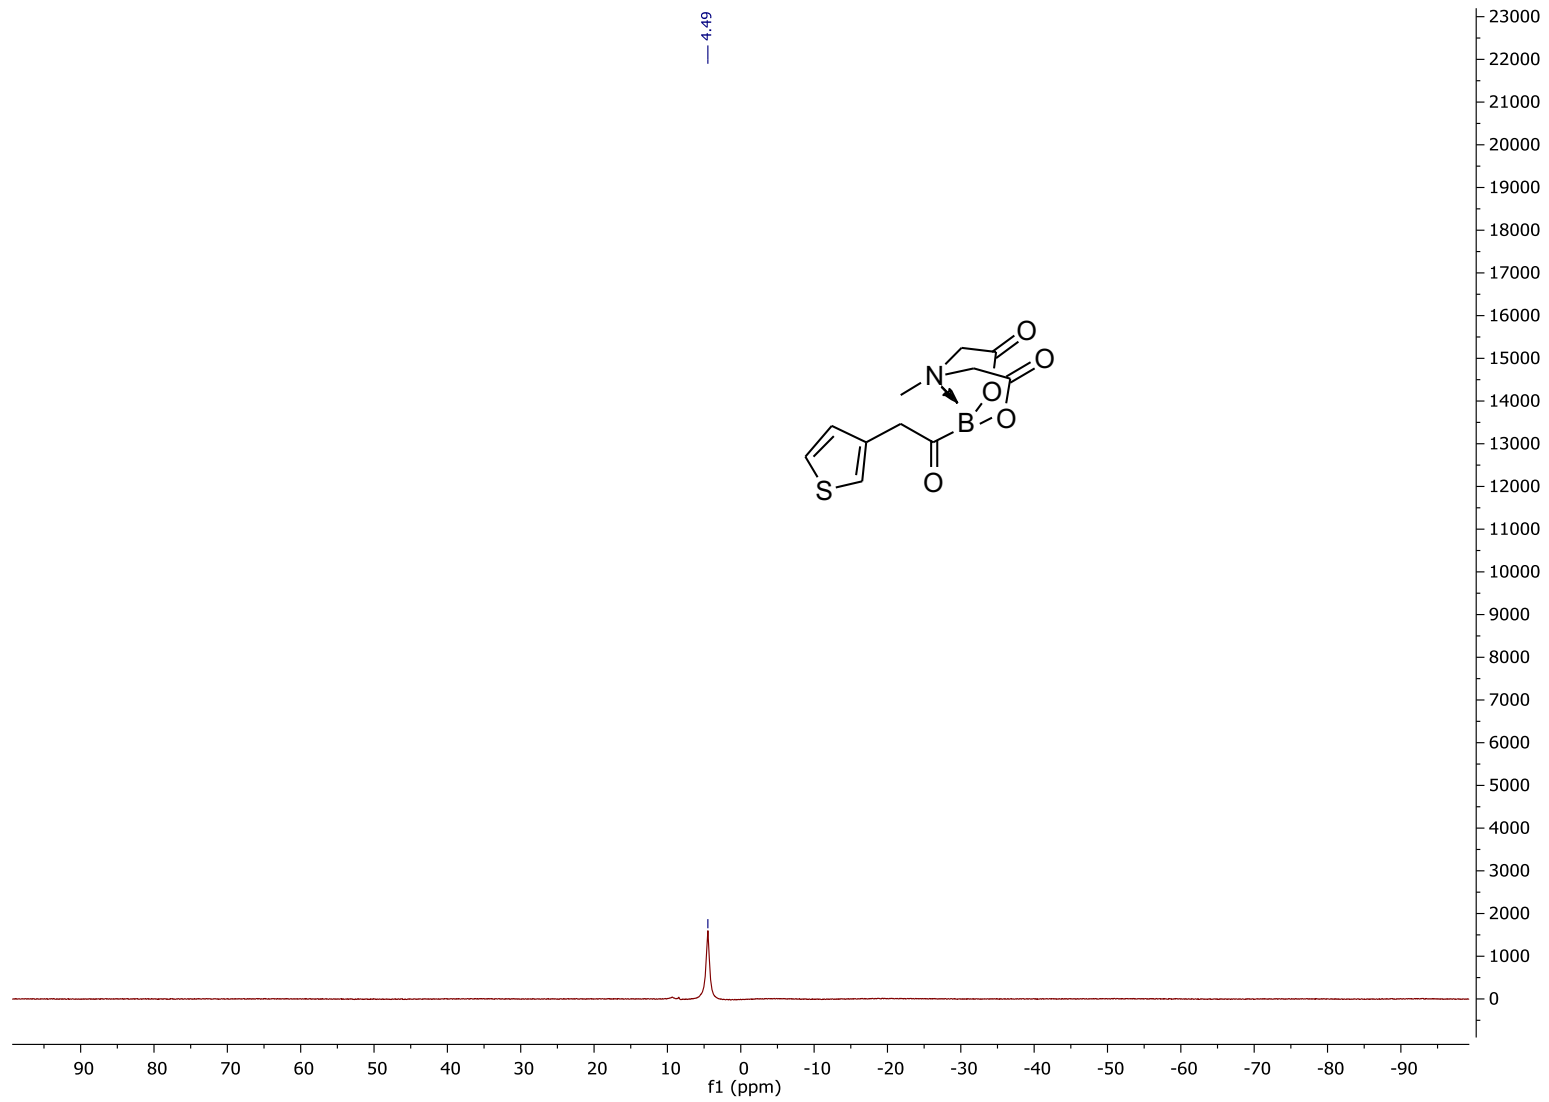

<sup>1</sup>H NMR, compound 5k

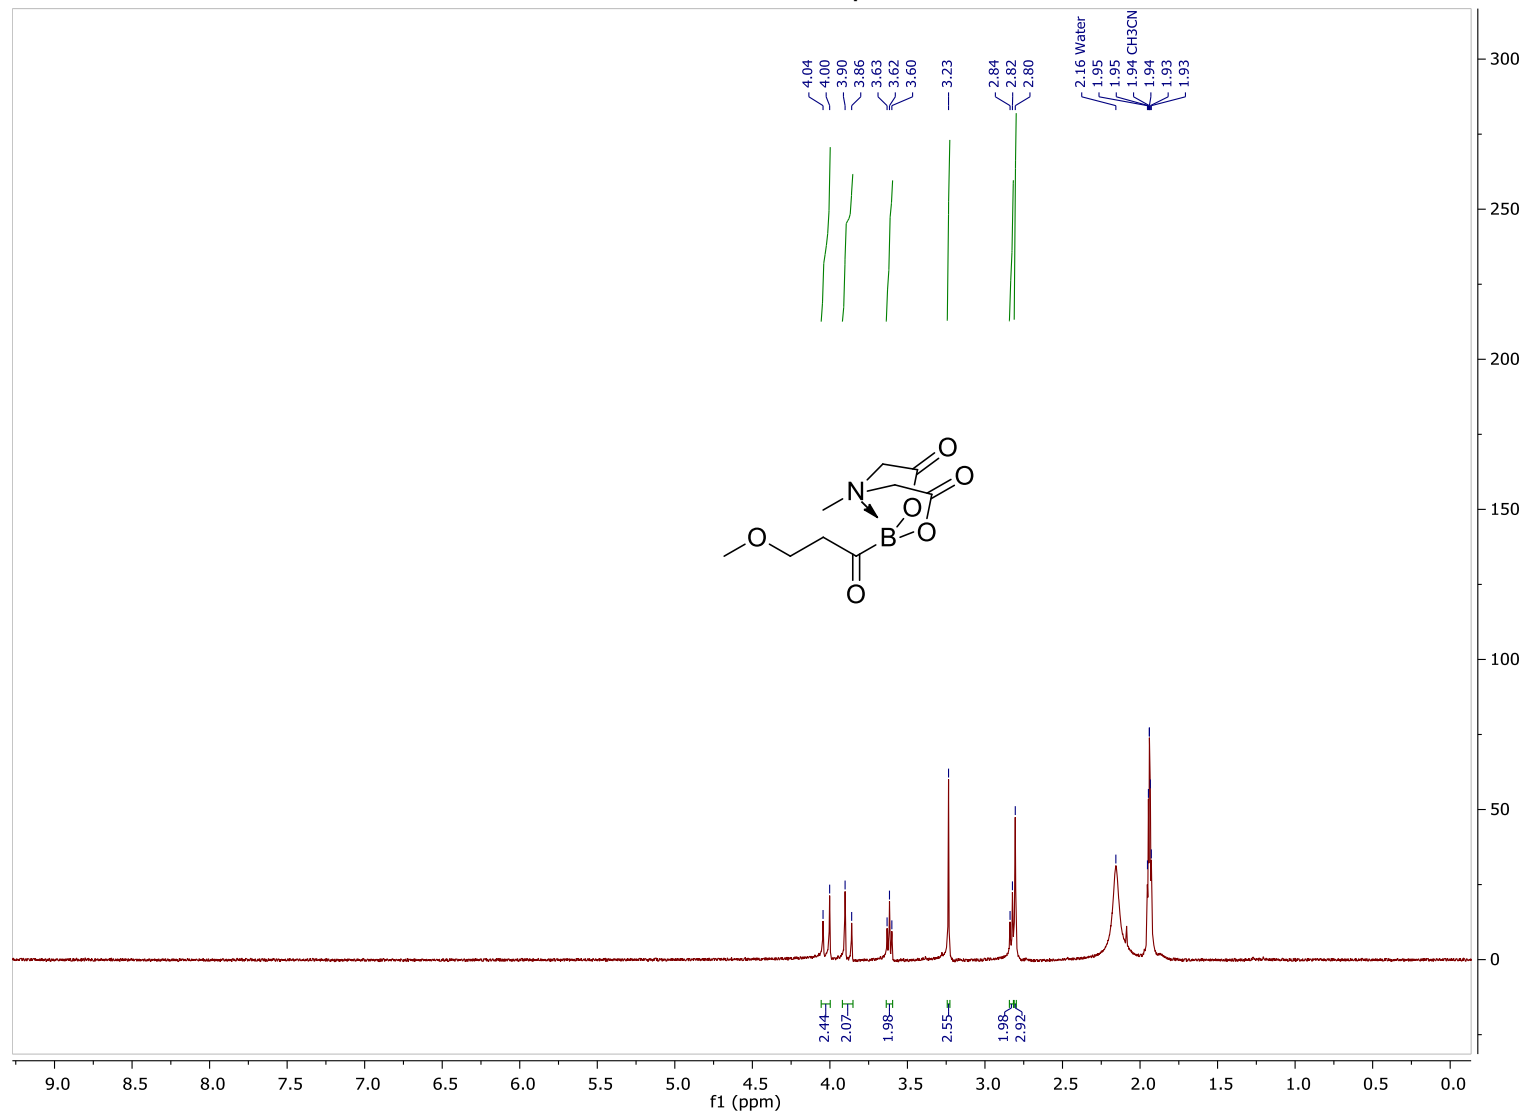

<sup>13</sup>C NMR, compound 5k

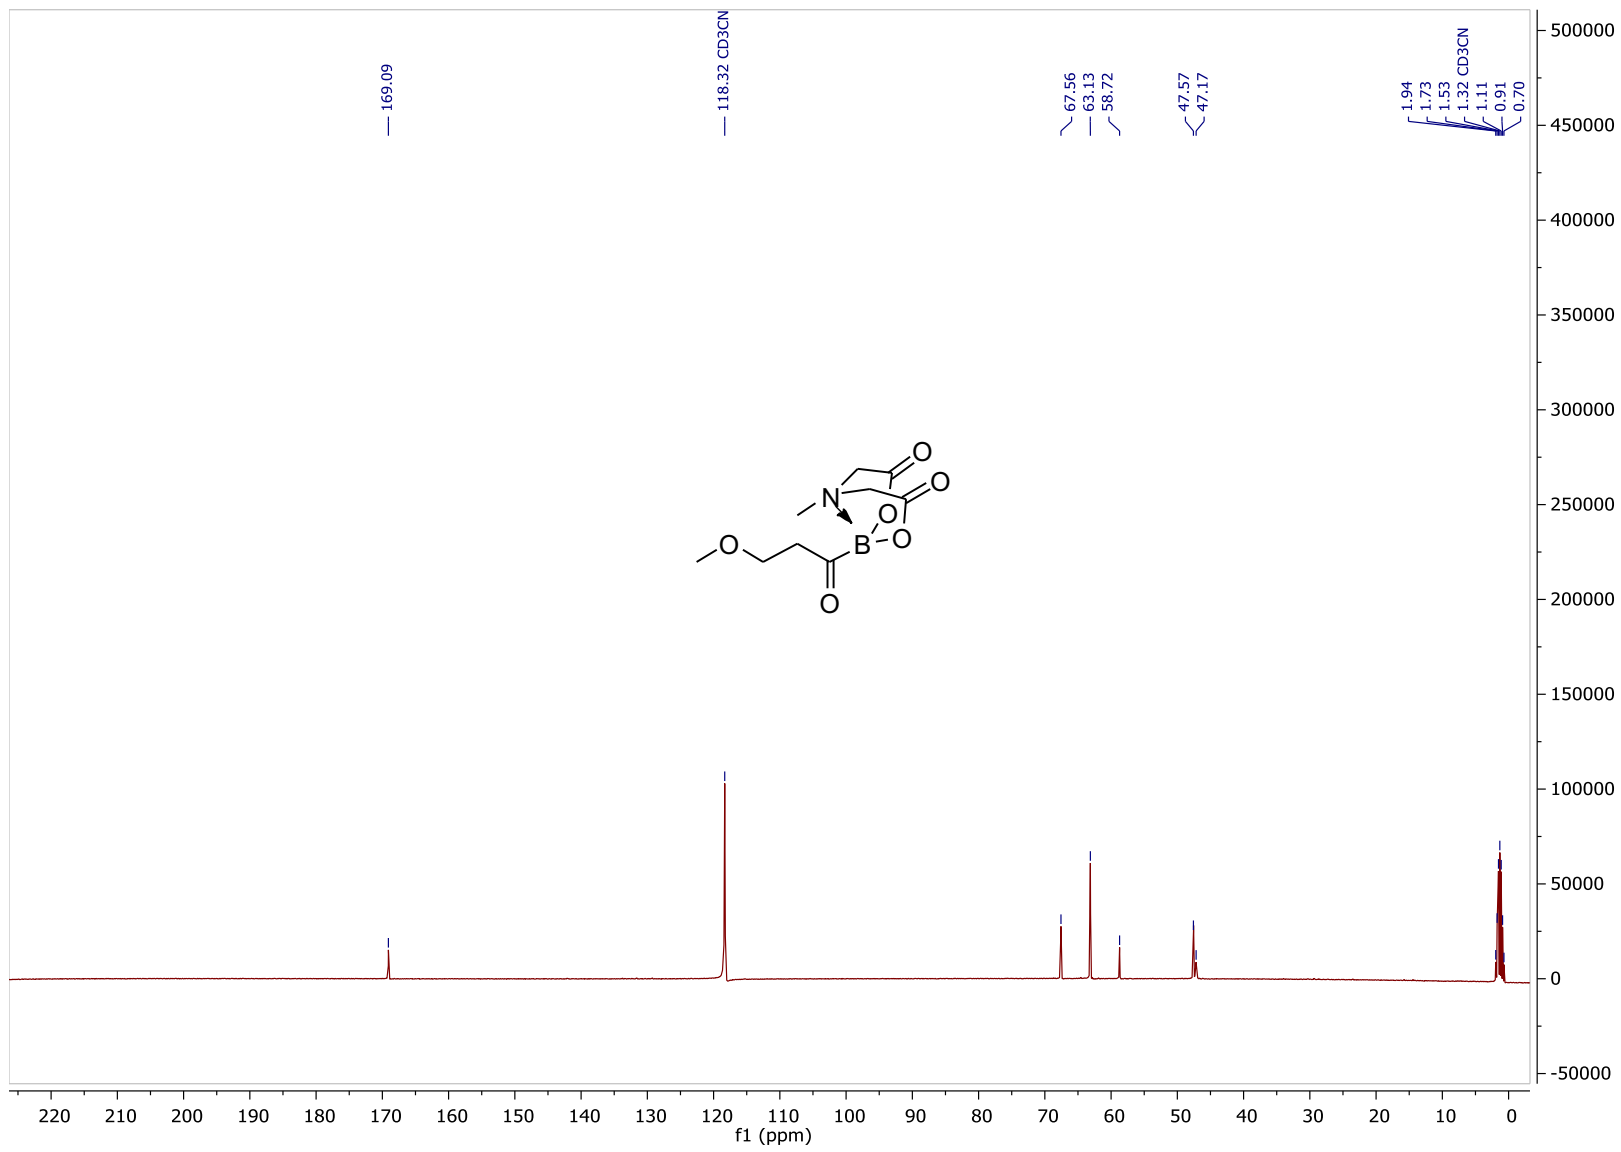

<sup>11</sup>B NMR, compound 5k

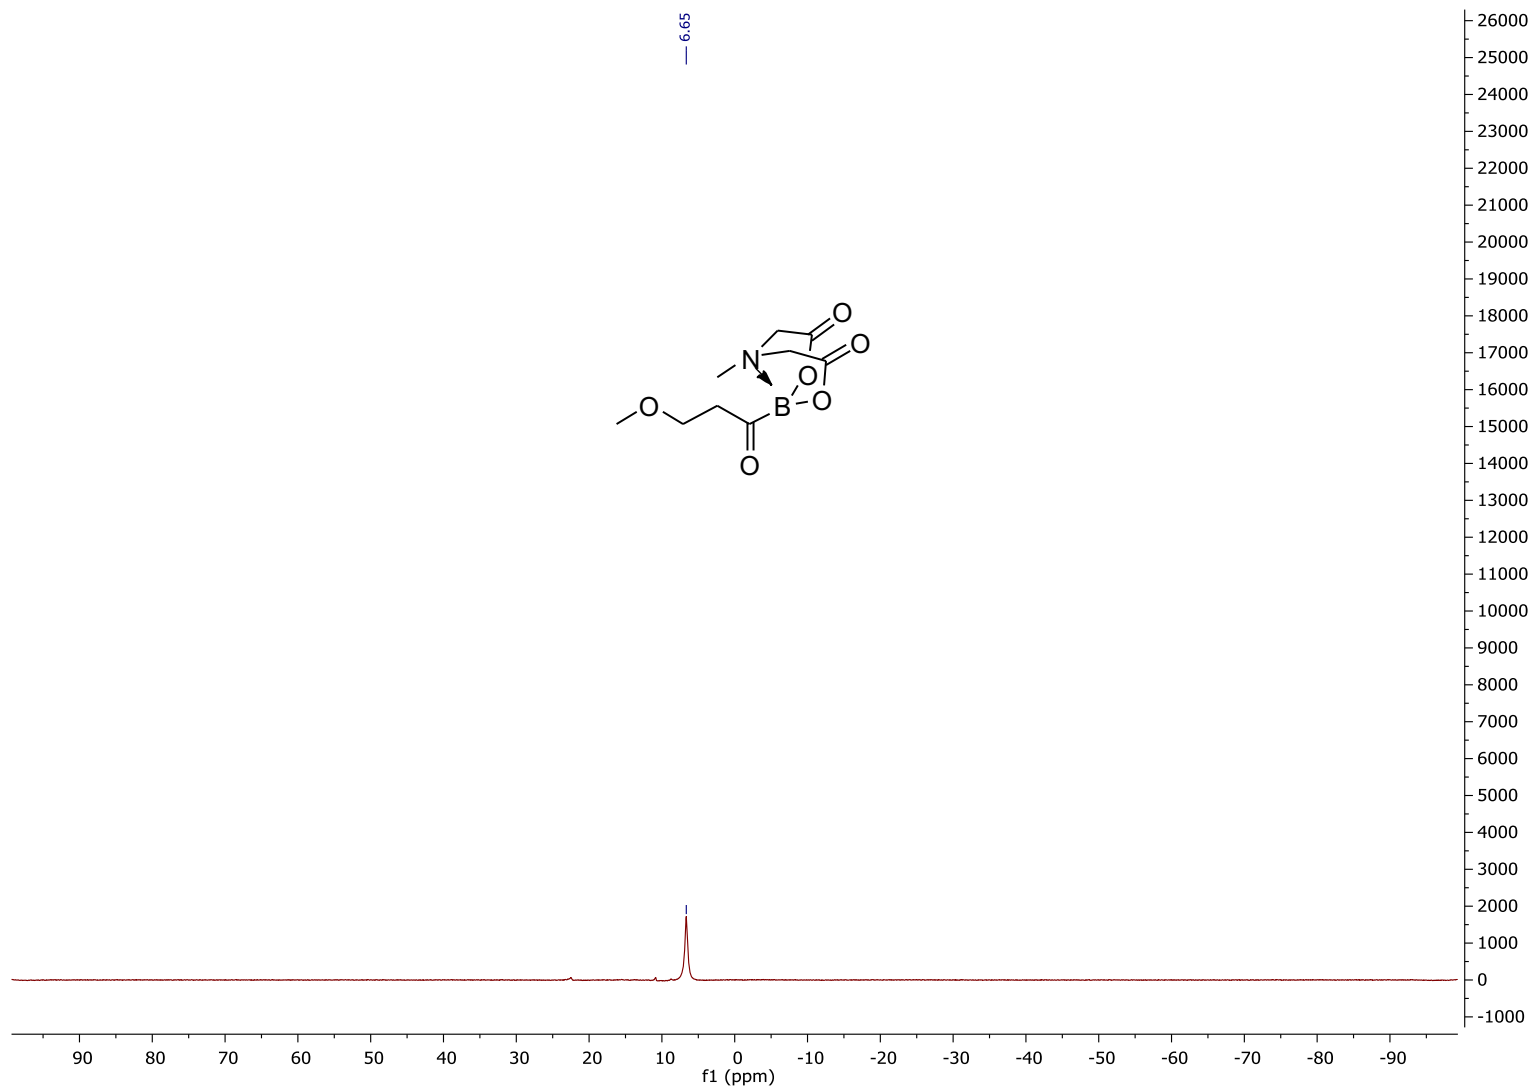

<sup>1</sup>H NMR, compound 5I

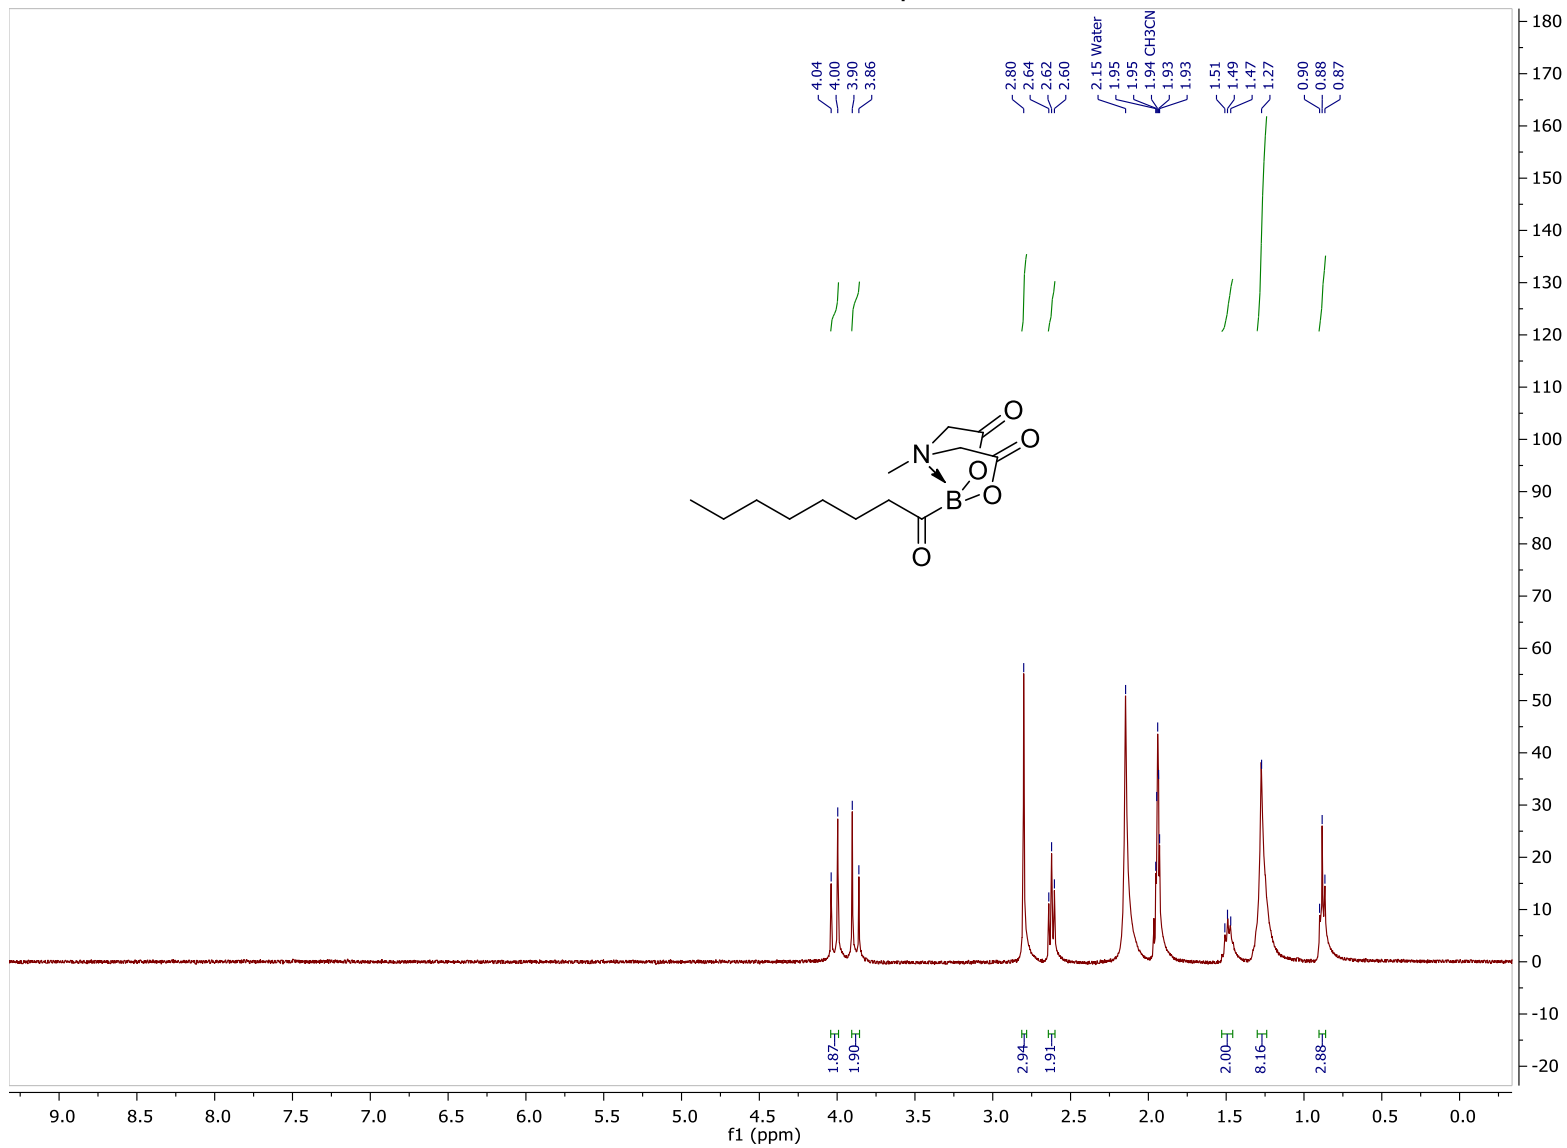

<sup>13</sup>C NMR, compound 5I

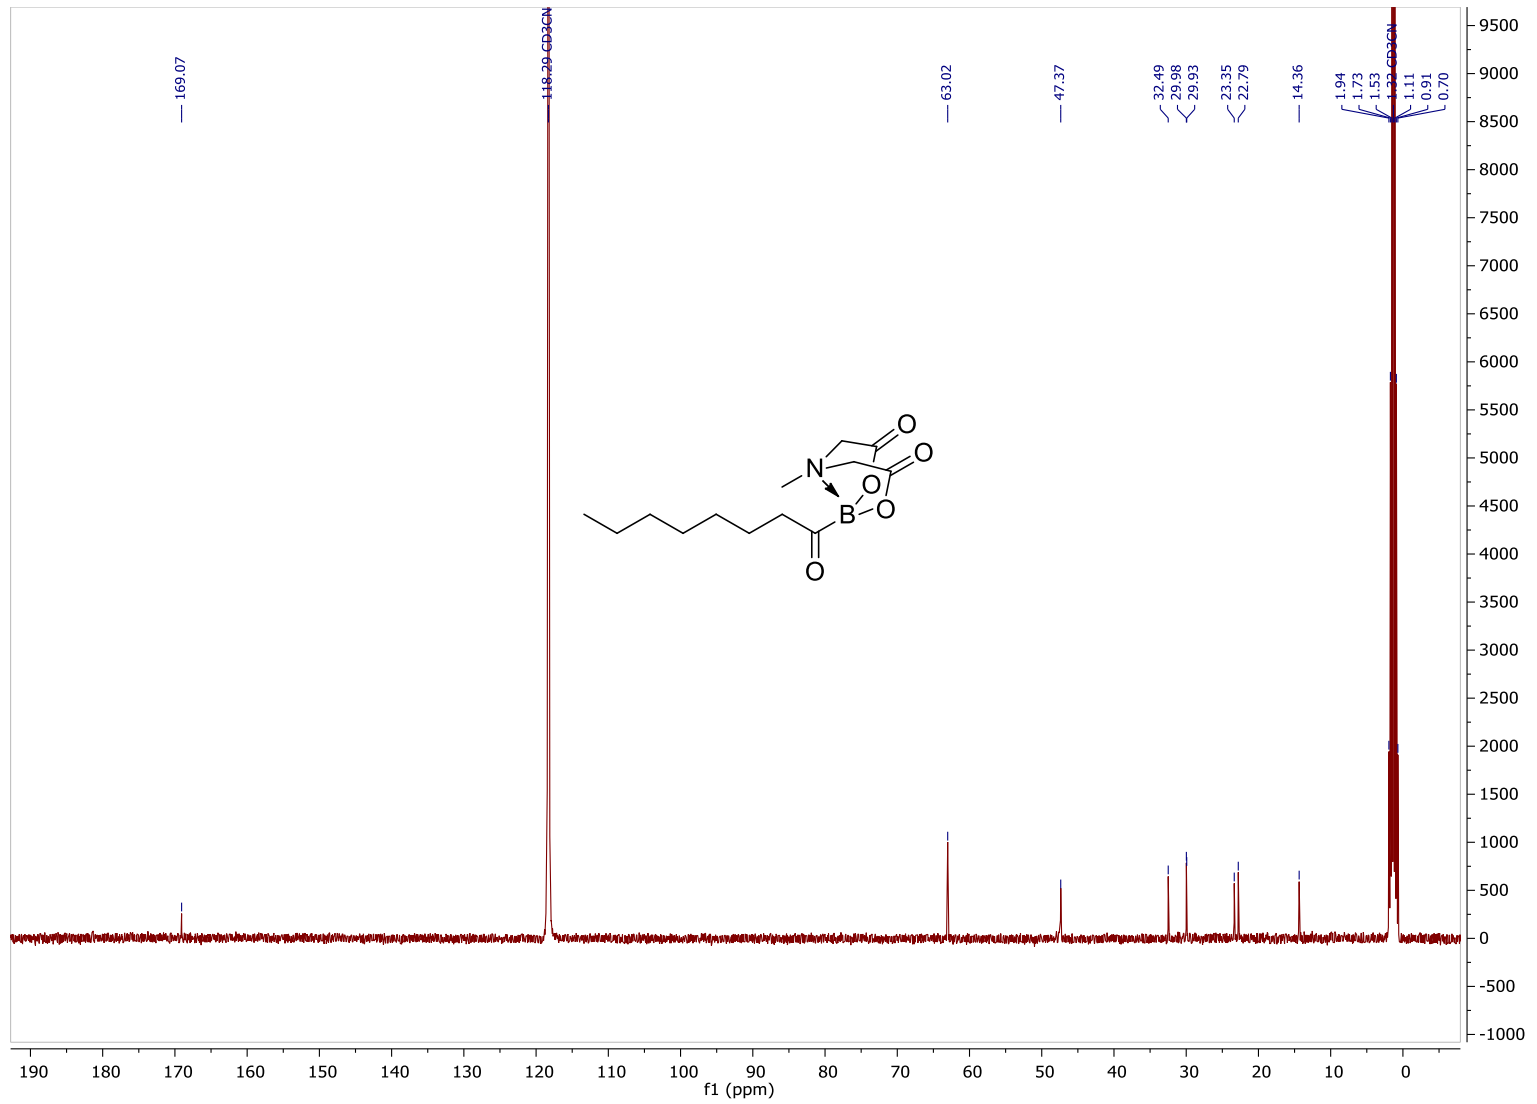

<sup>11</sup>B NMR, compound 5I

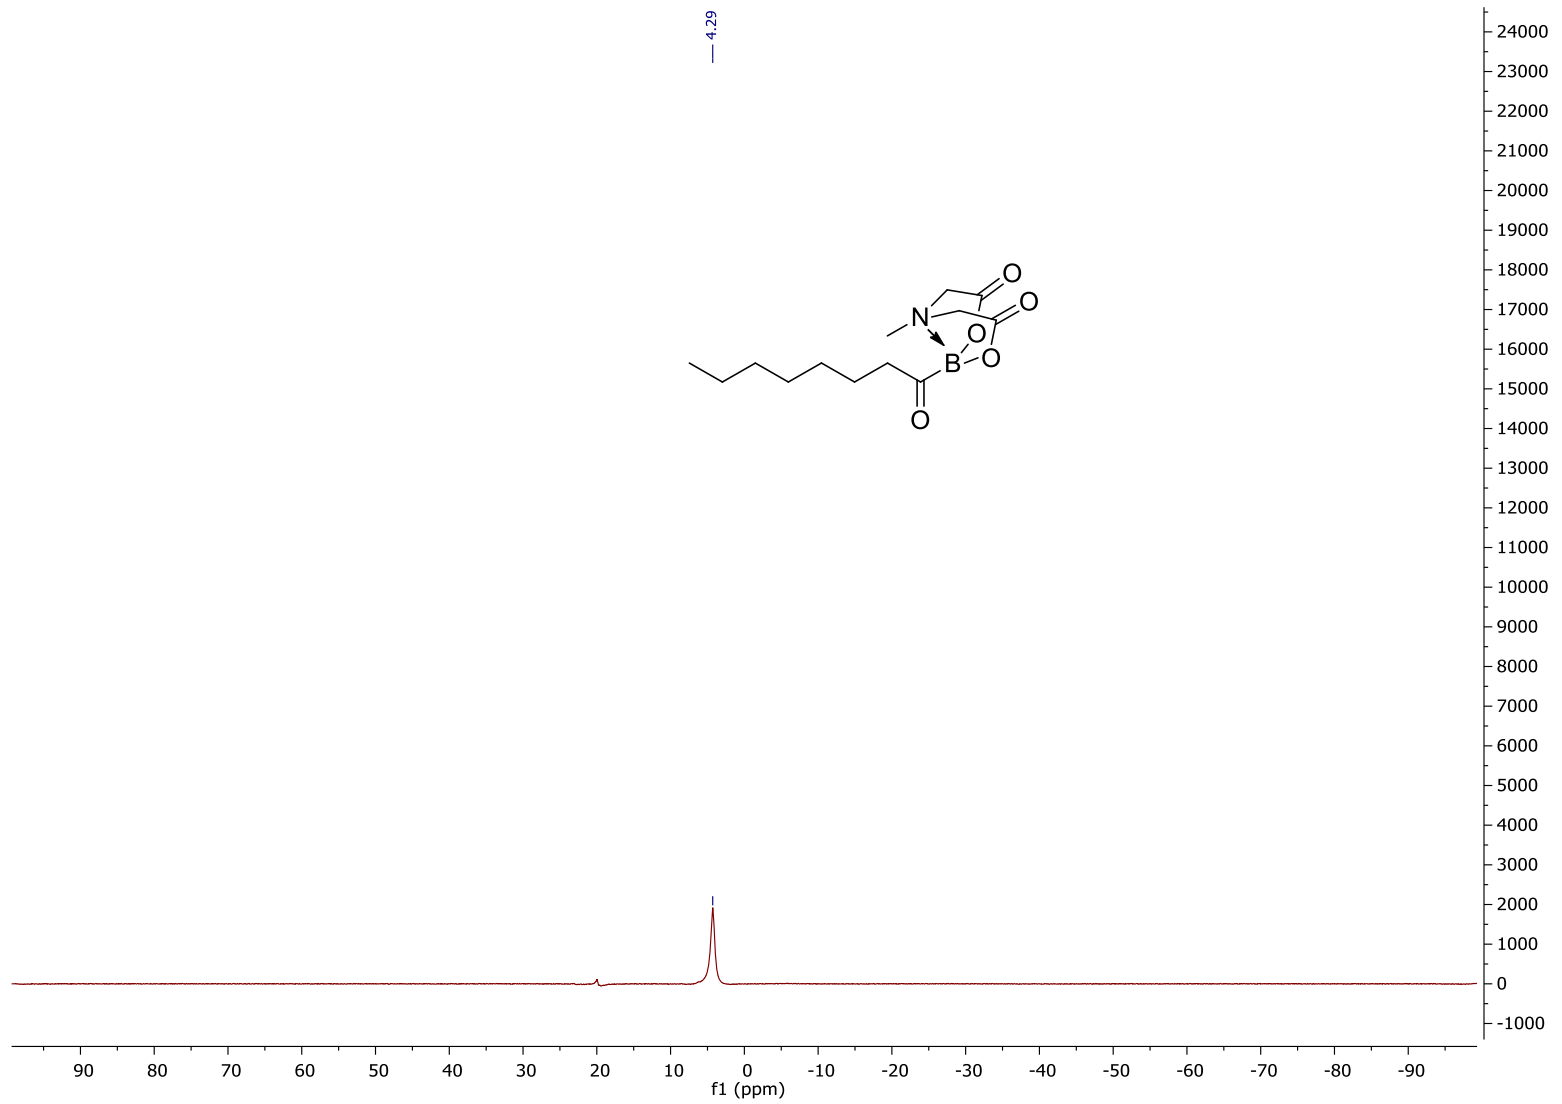

<sup>1</sup>H NMR, compound 5m

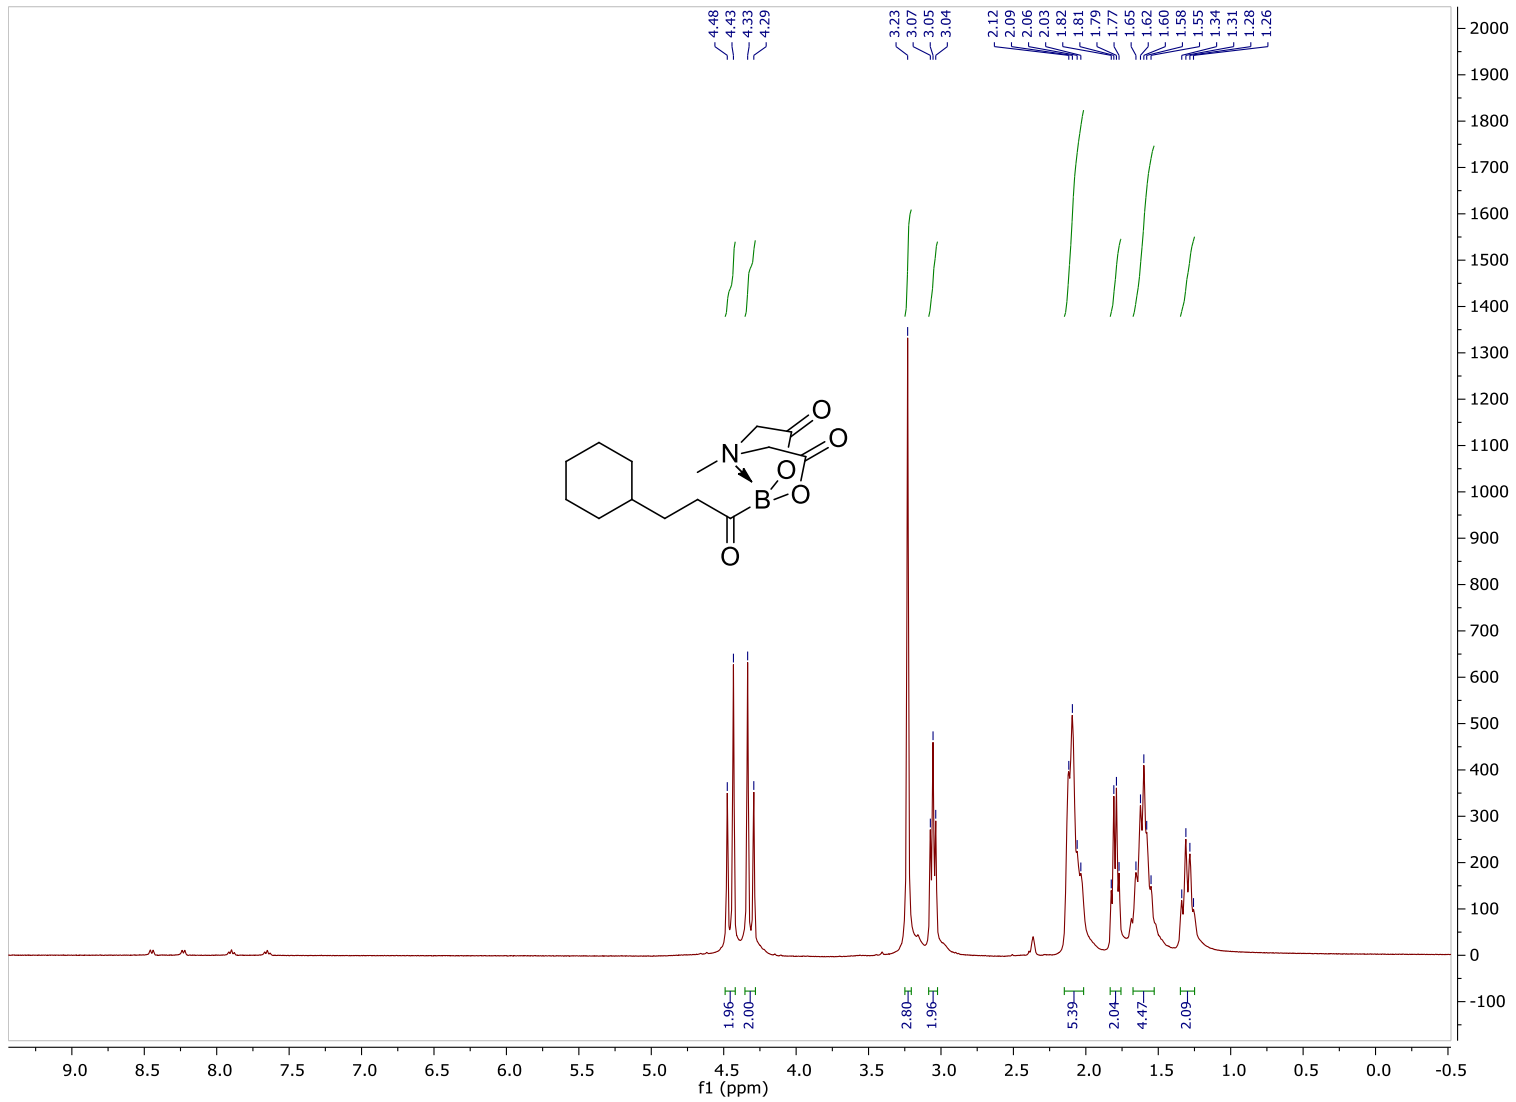



<sup>13</sup>C NMR, compound 5m

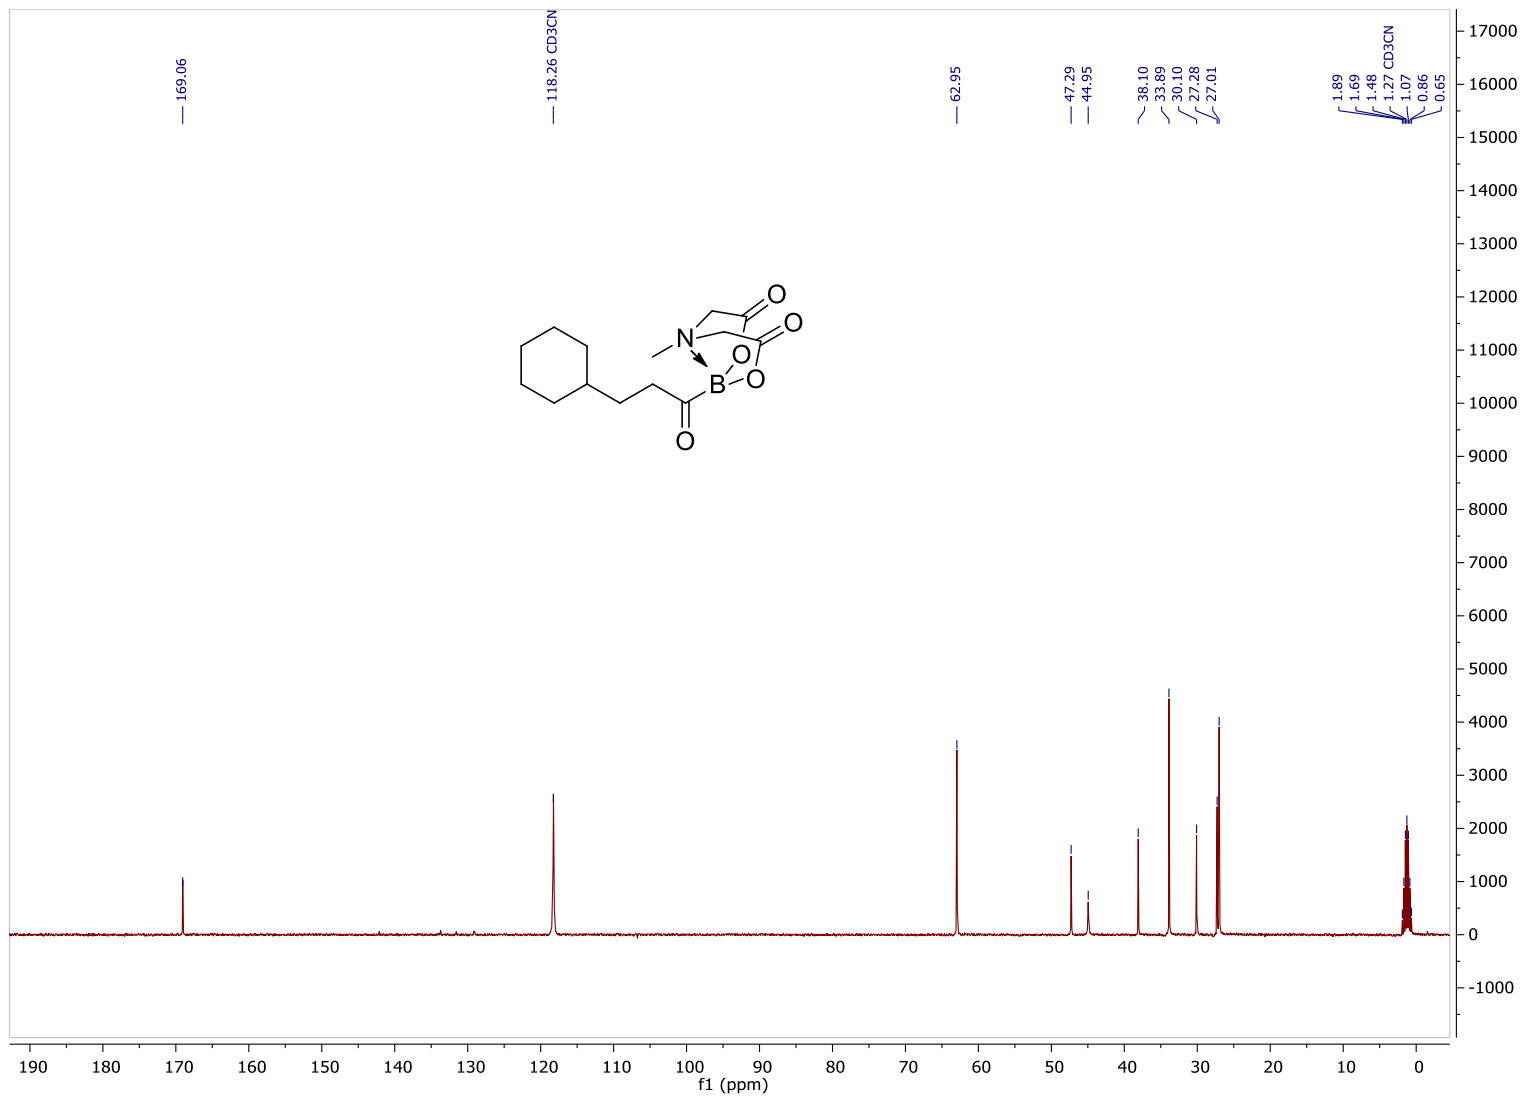

<sup>11</sup>B NMR, compound 5m

6.78

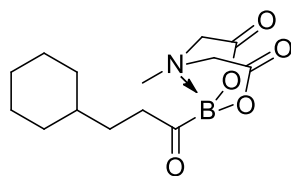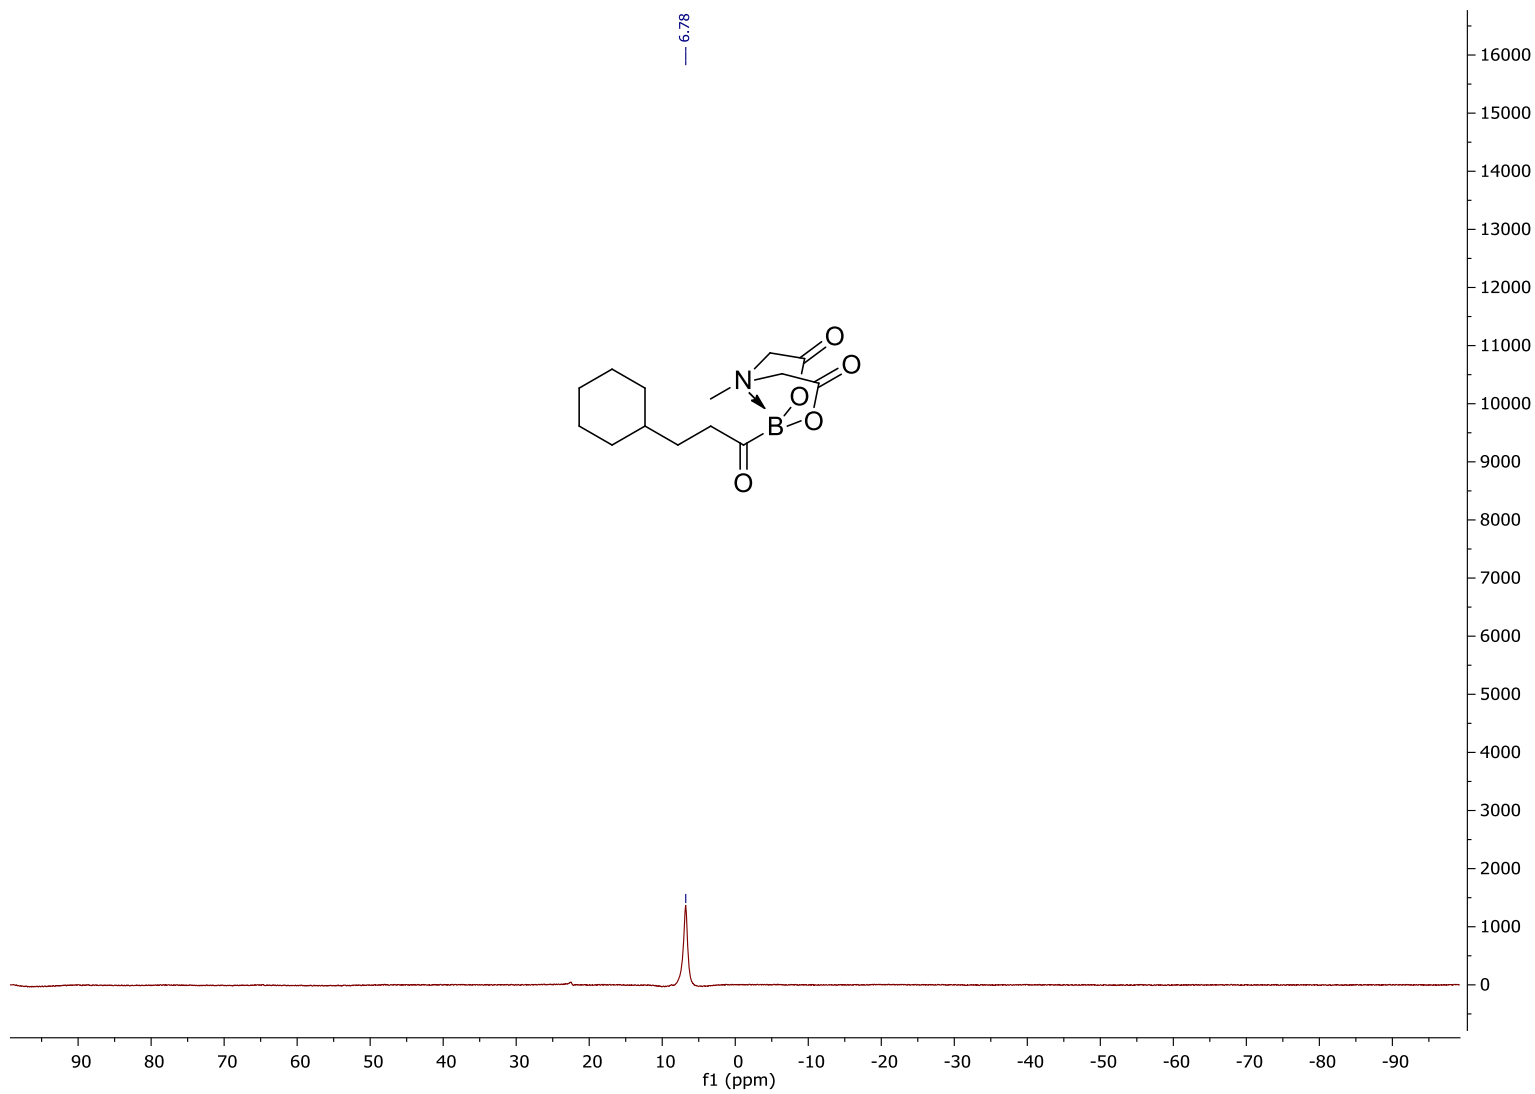

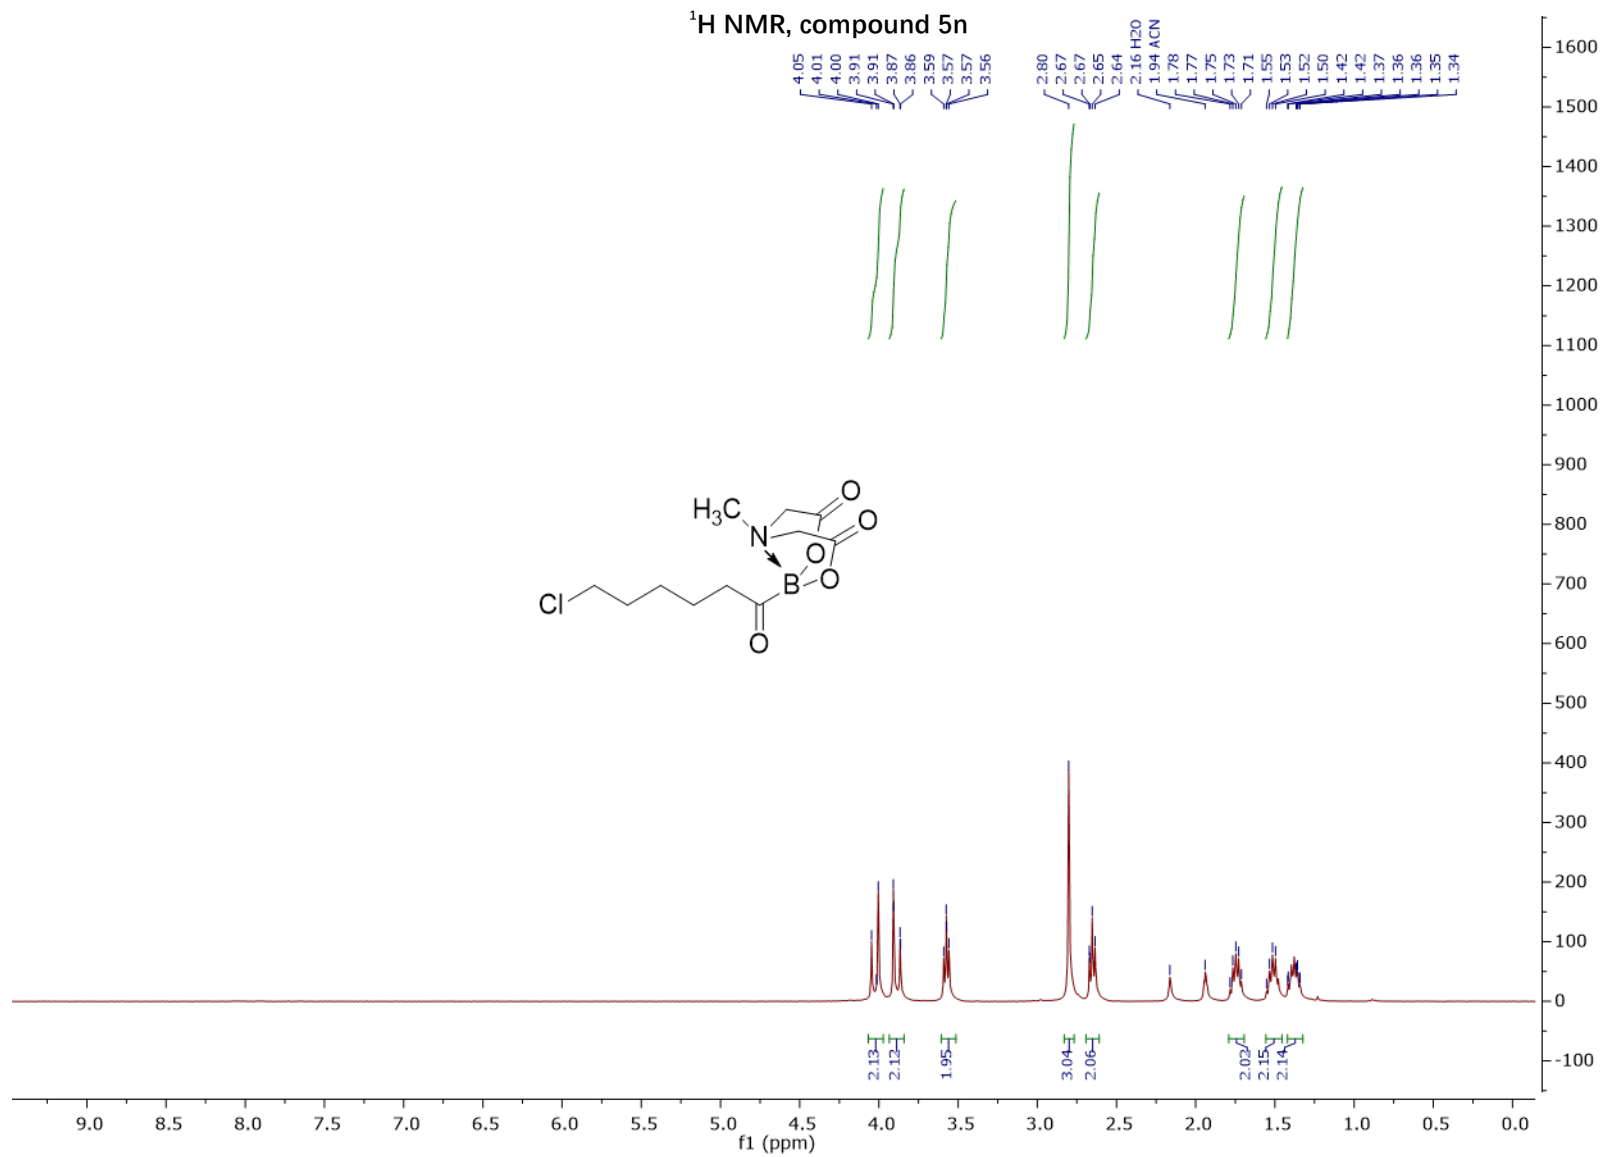

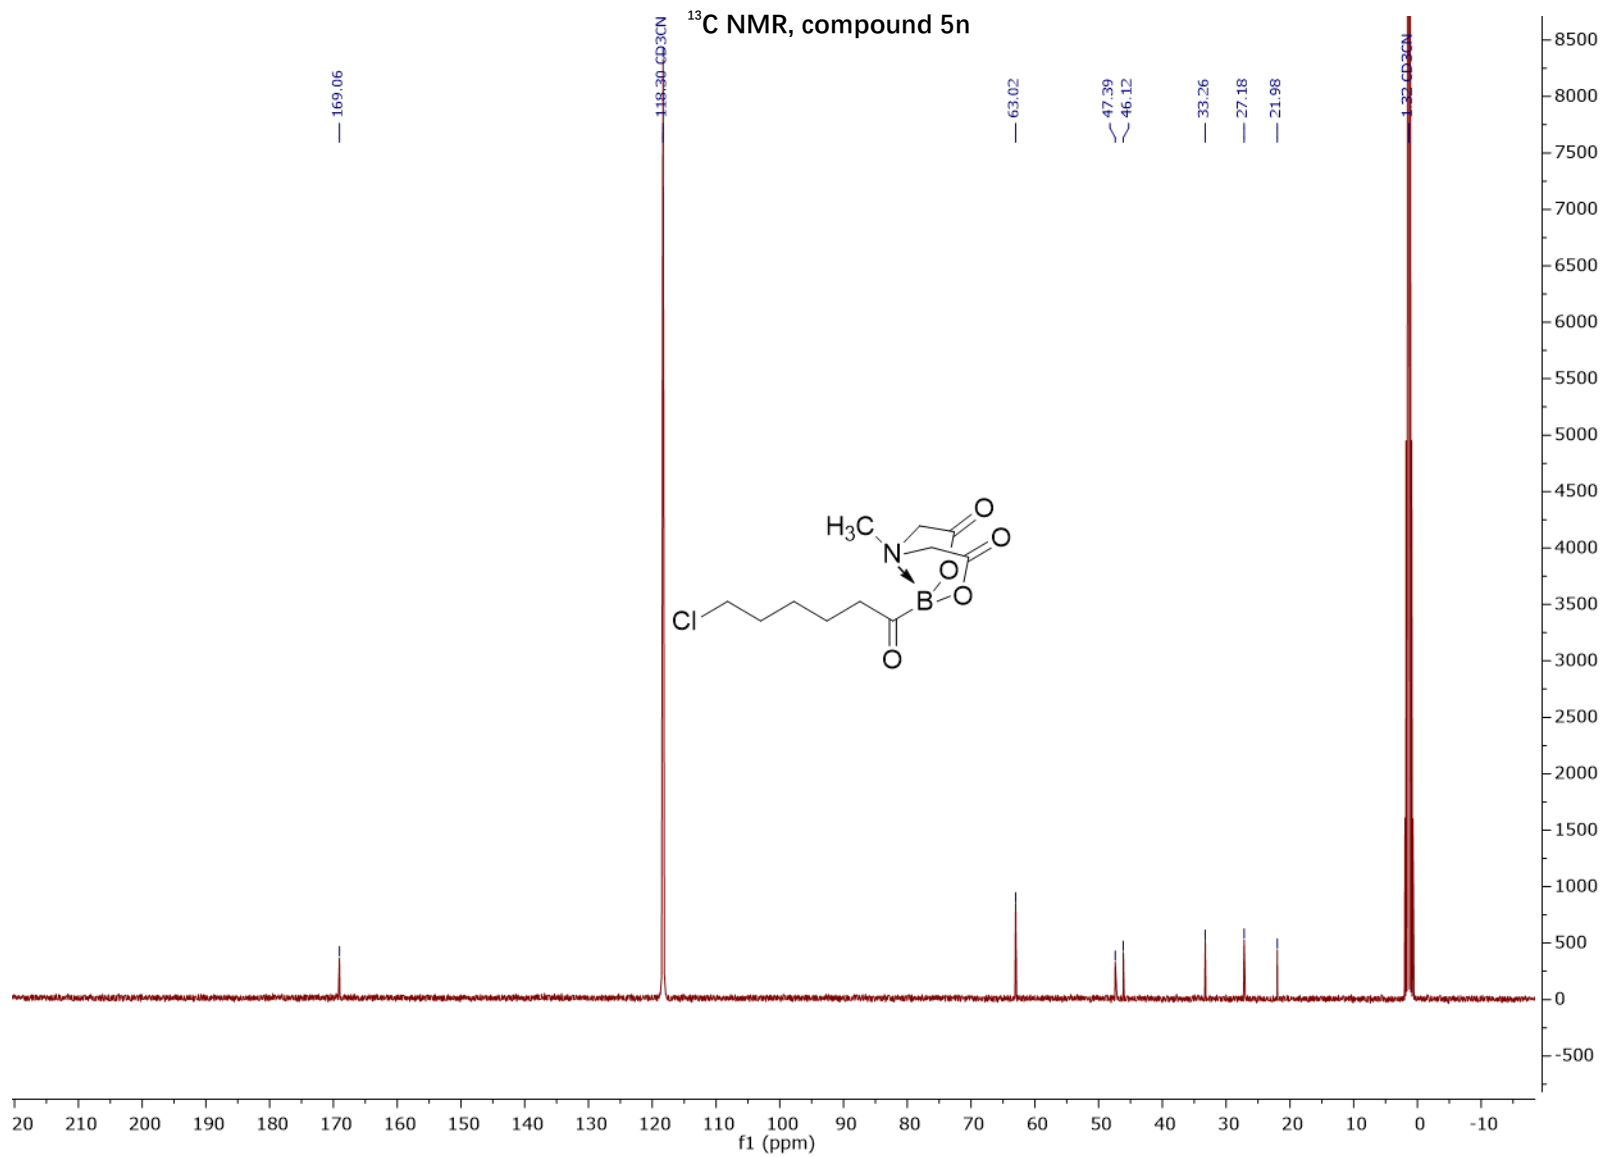

$^{11}\text{B}$  NMR, compound 5n

4.28

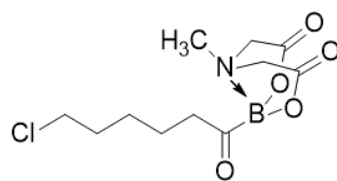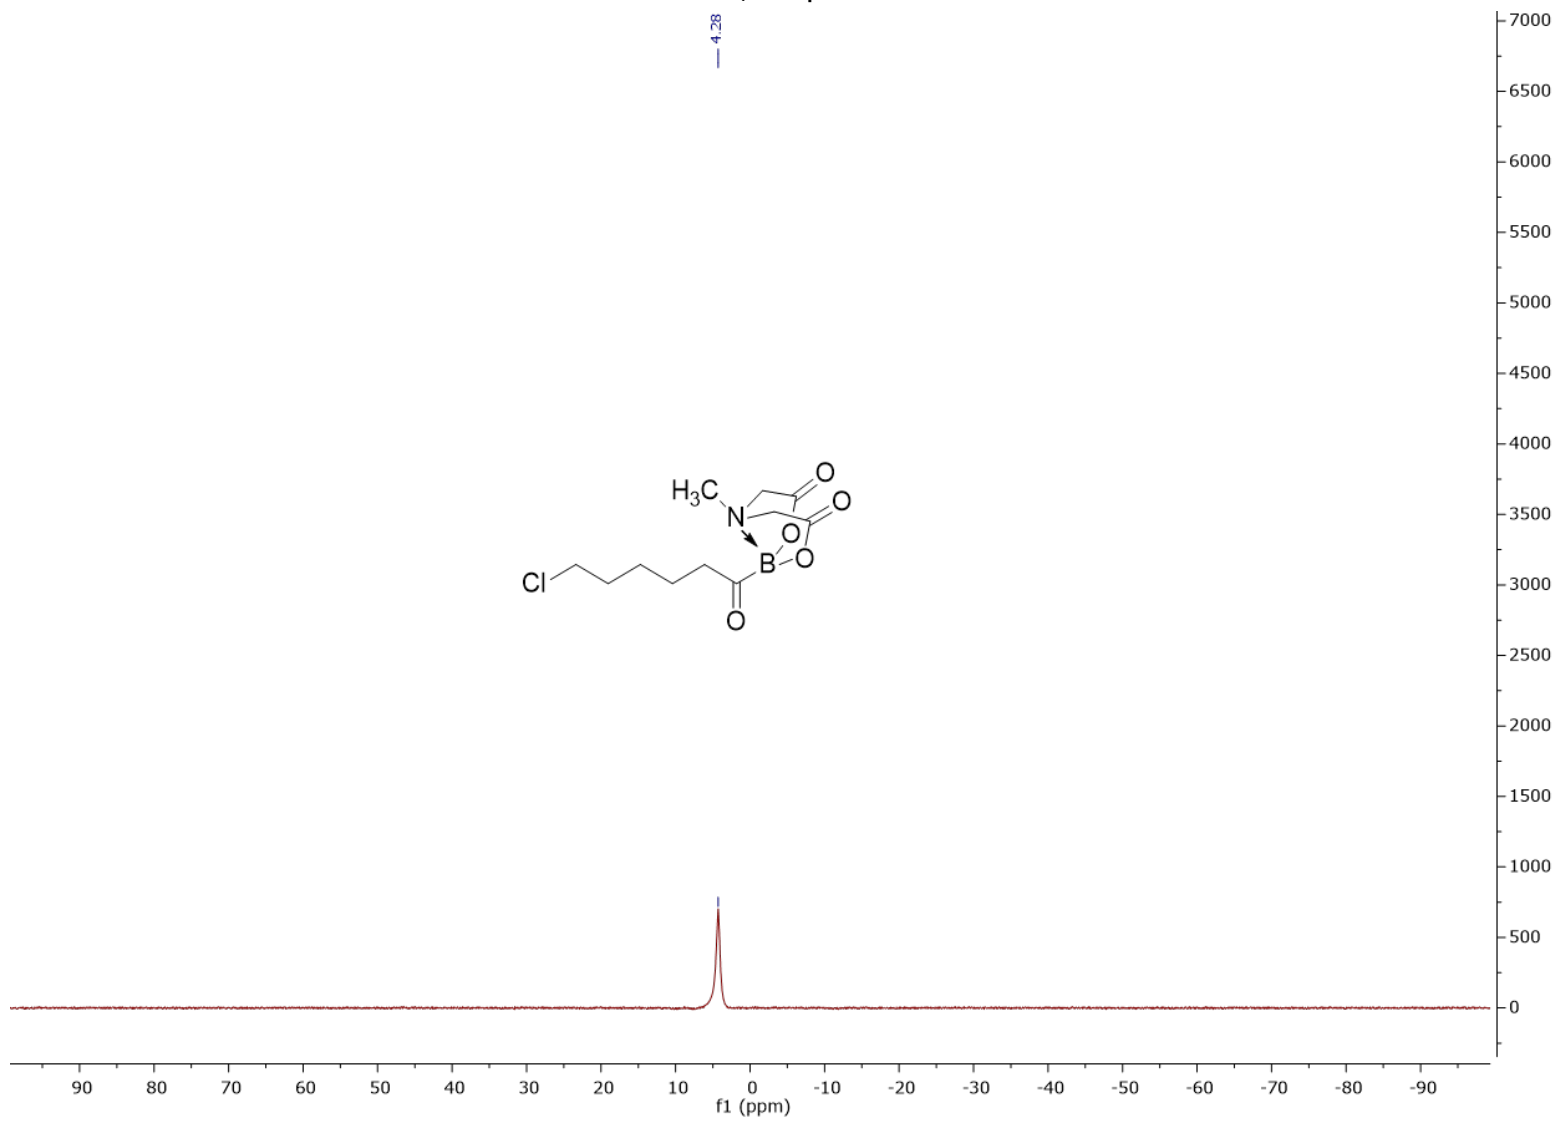

<sup>1</sup>H NMR, compound 5o

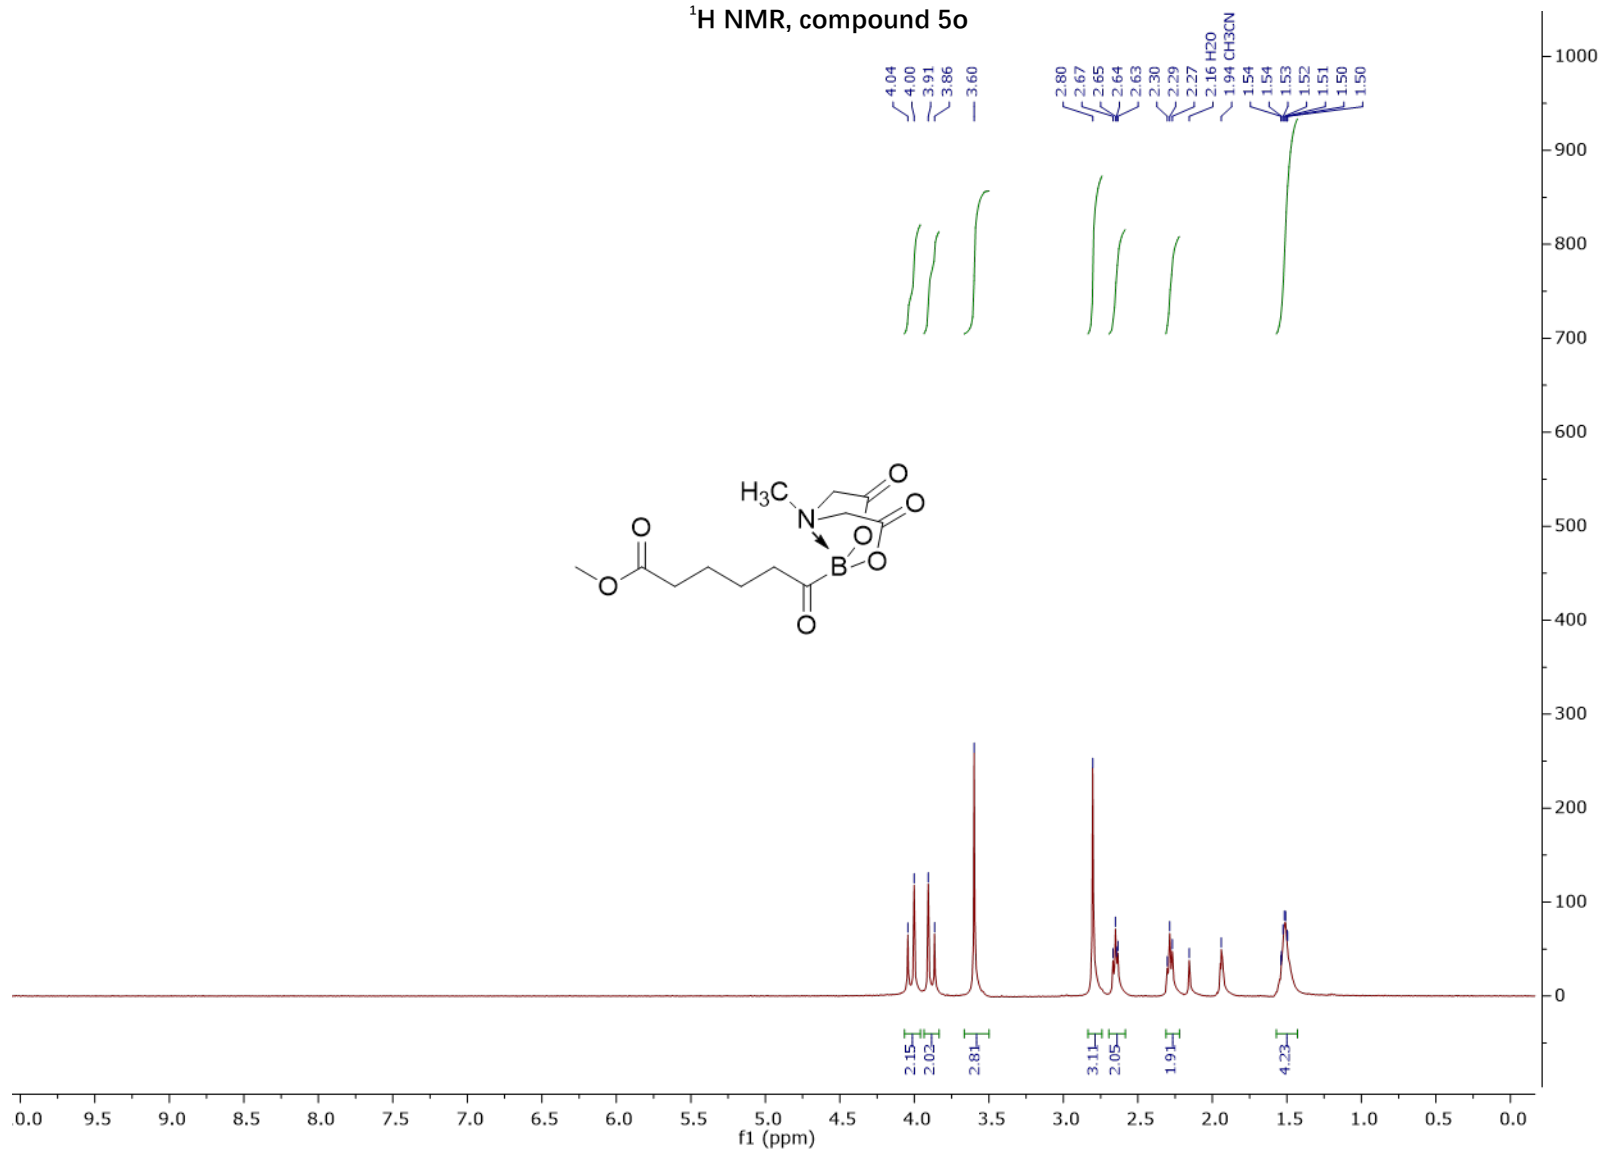

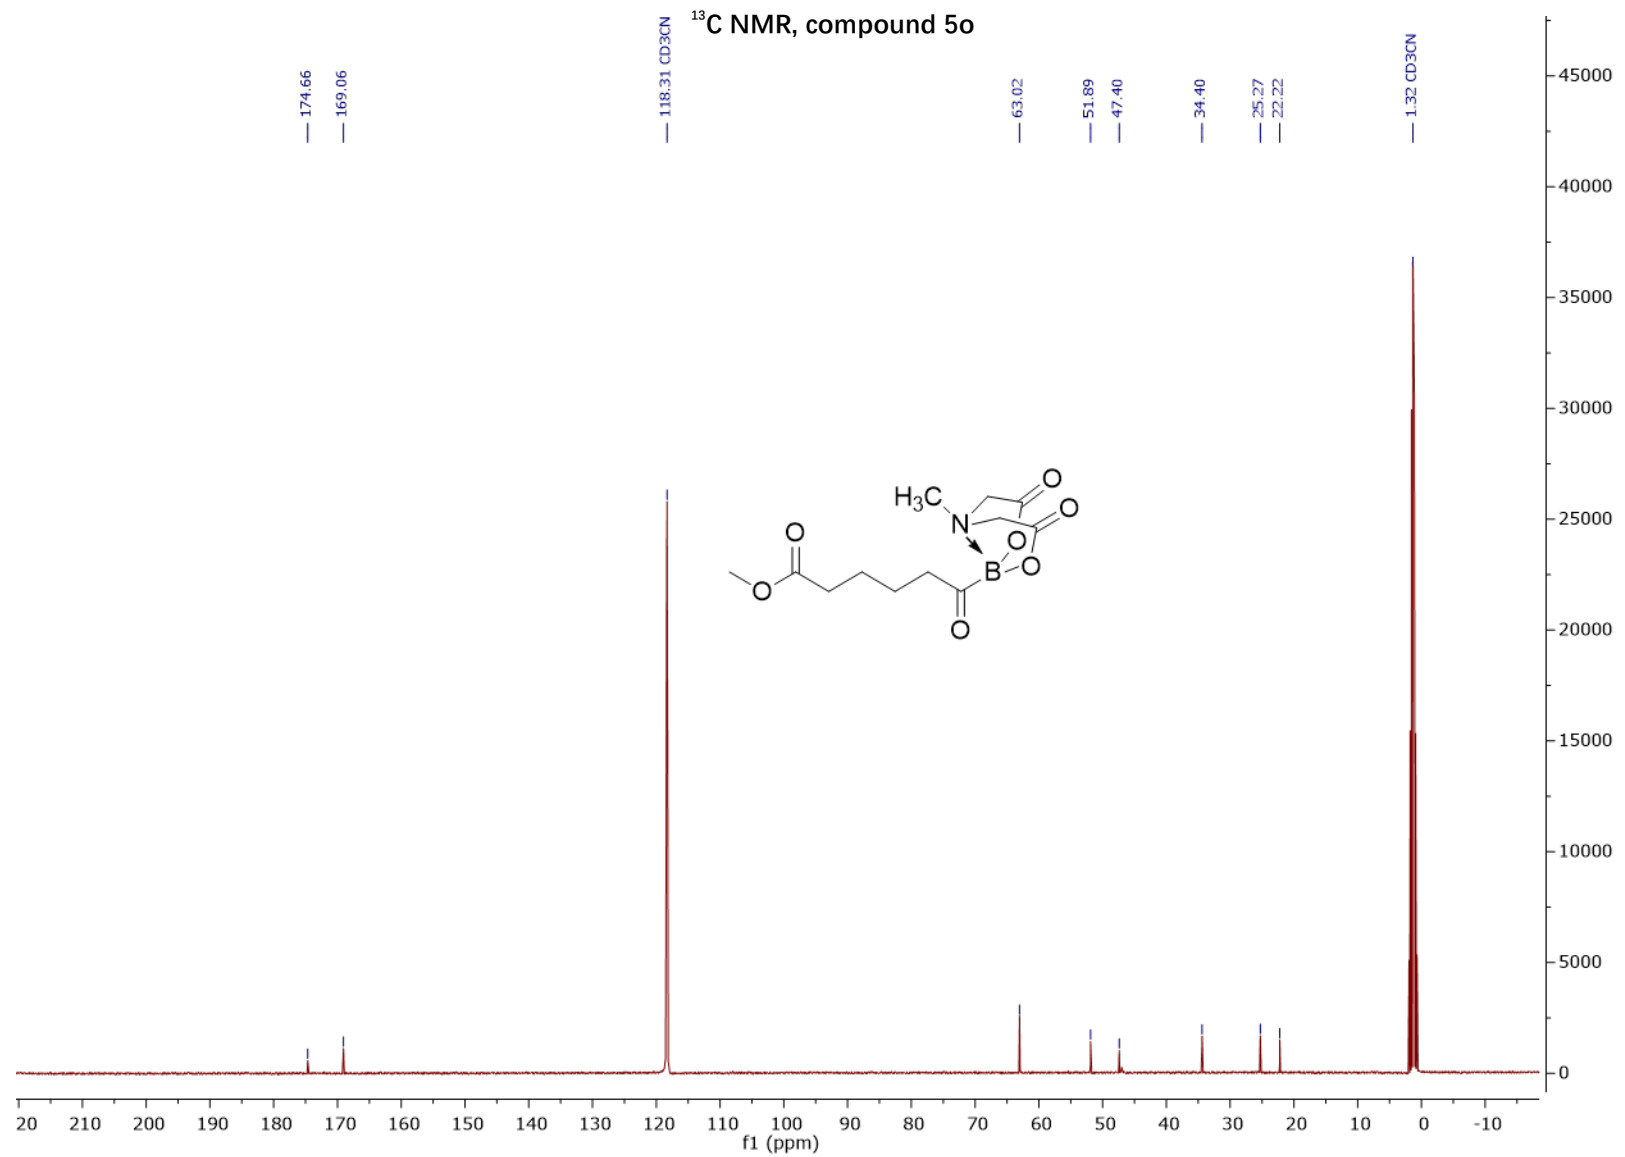

<sup>11</sup>B NMR, compound 5o

4.27

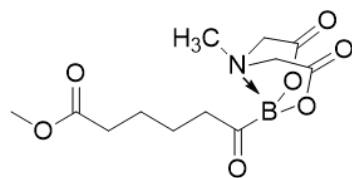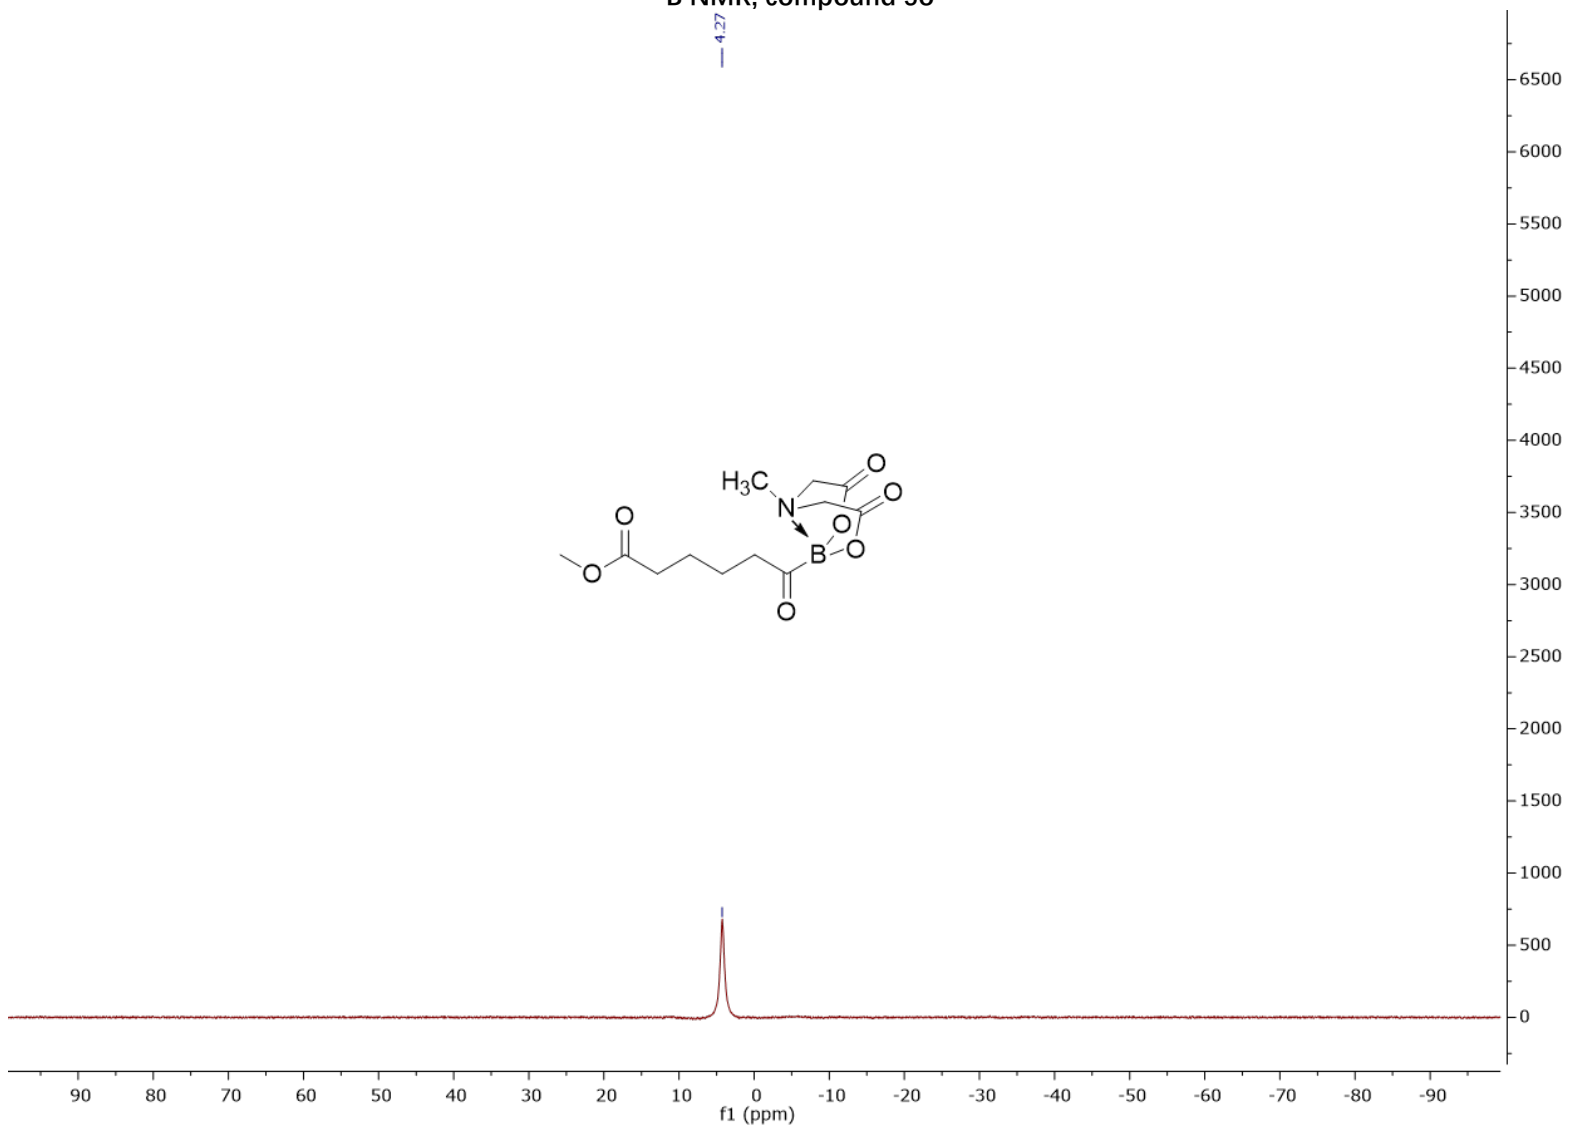



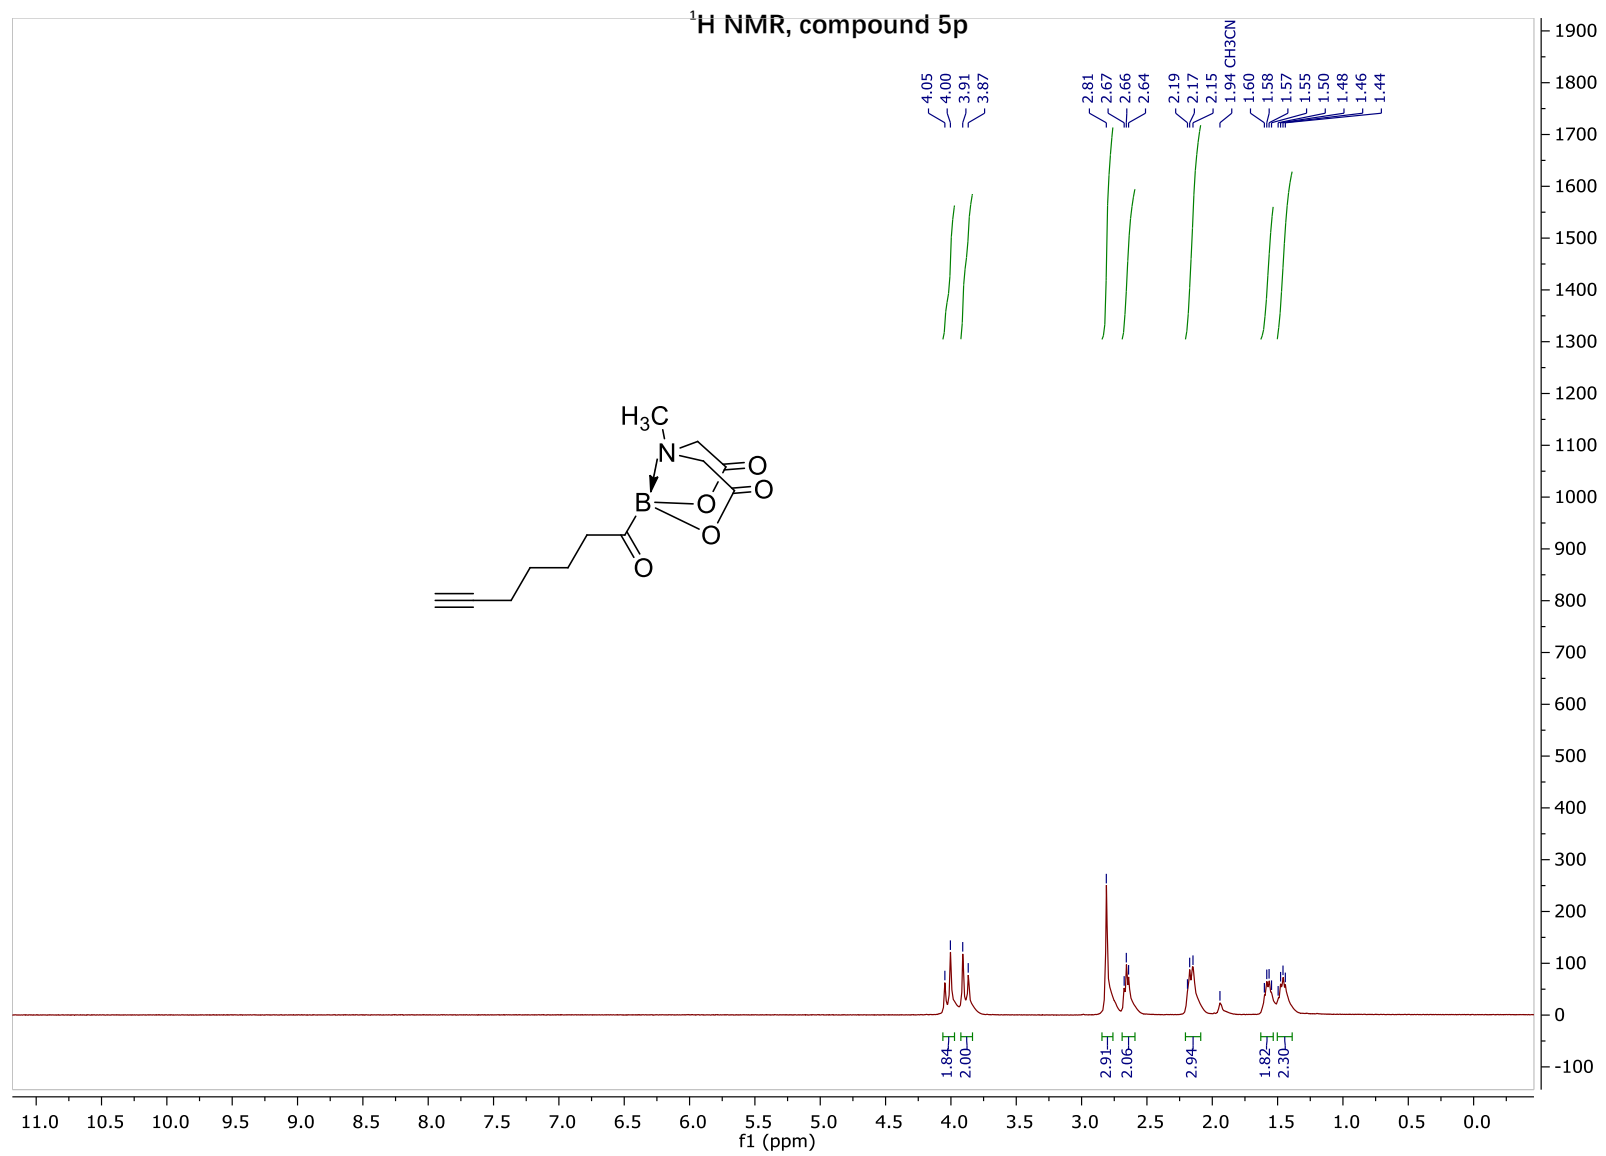

<sup>13</sup>C NMR, compound 5p

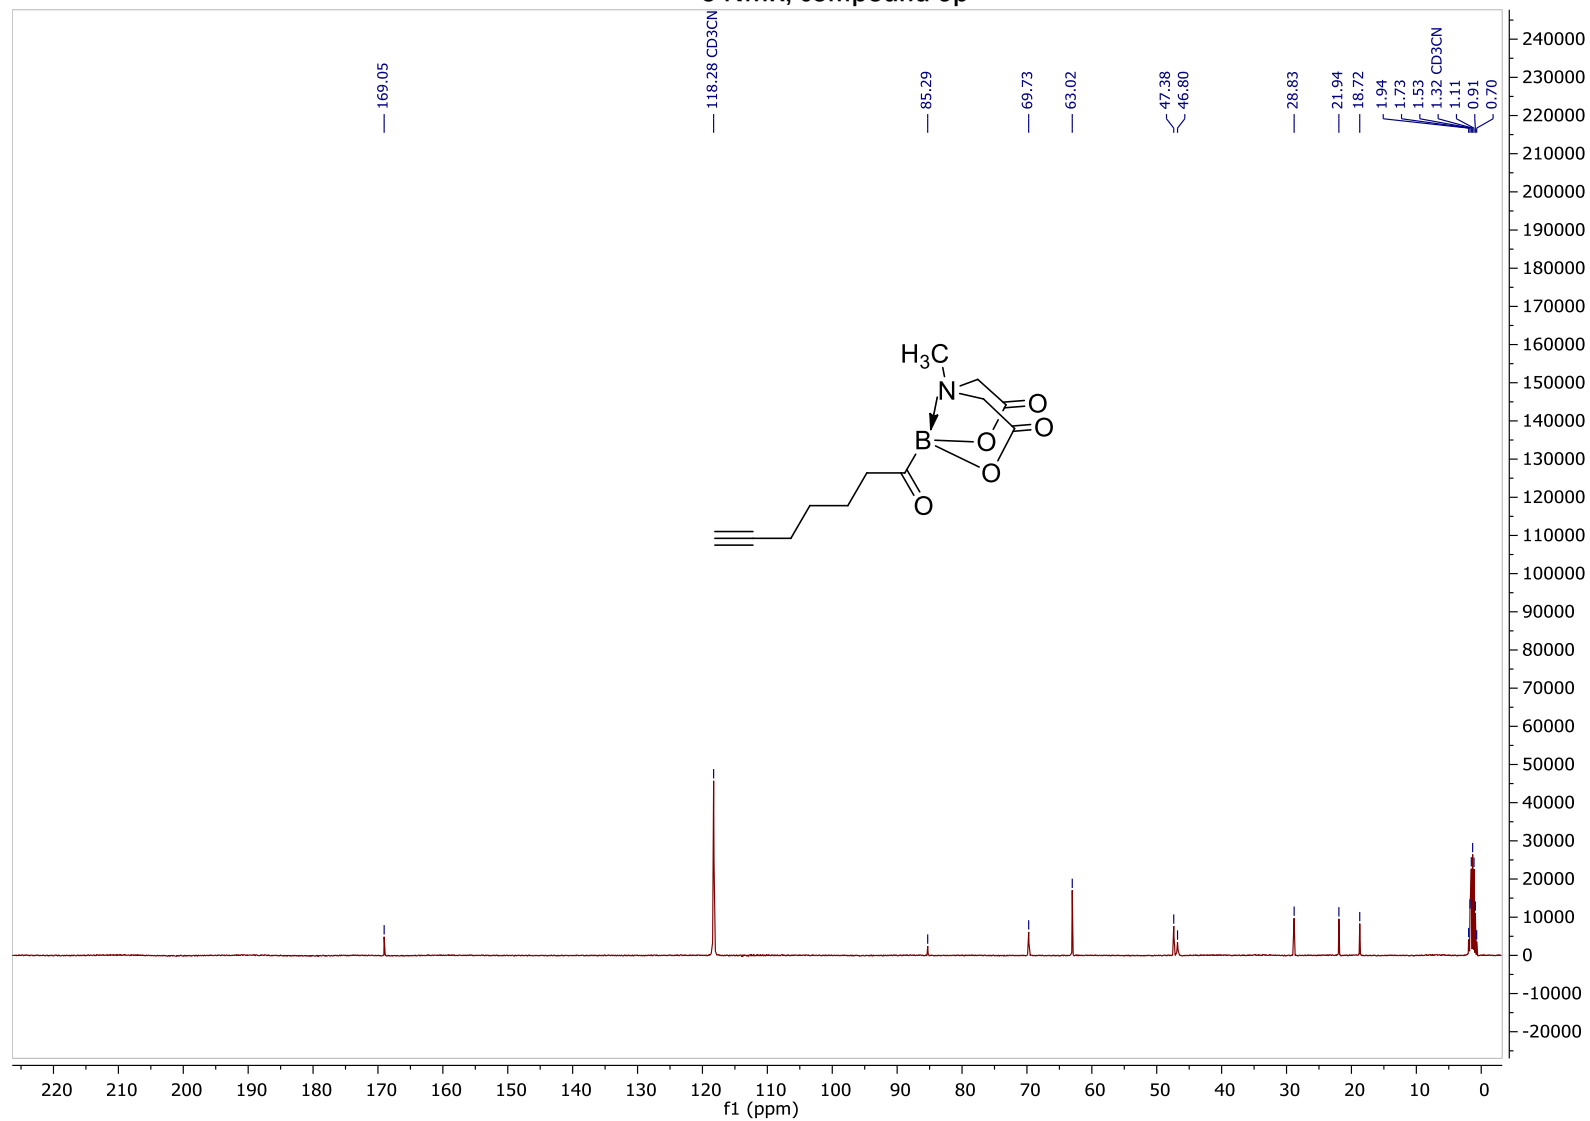

<sup>11</sup>B NMR, compound 5p

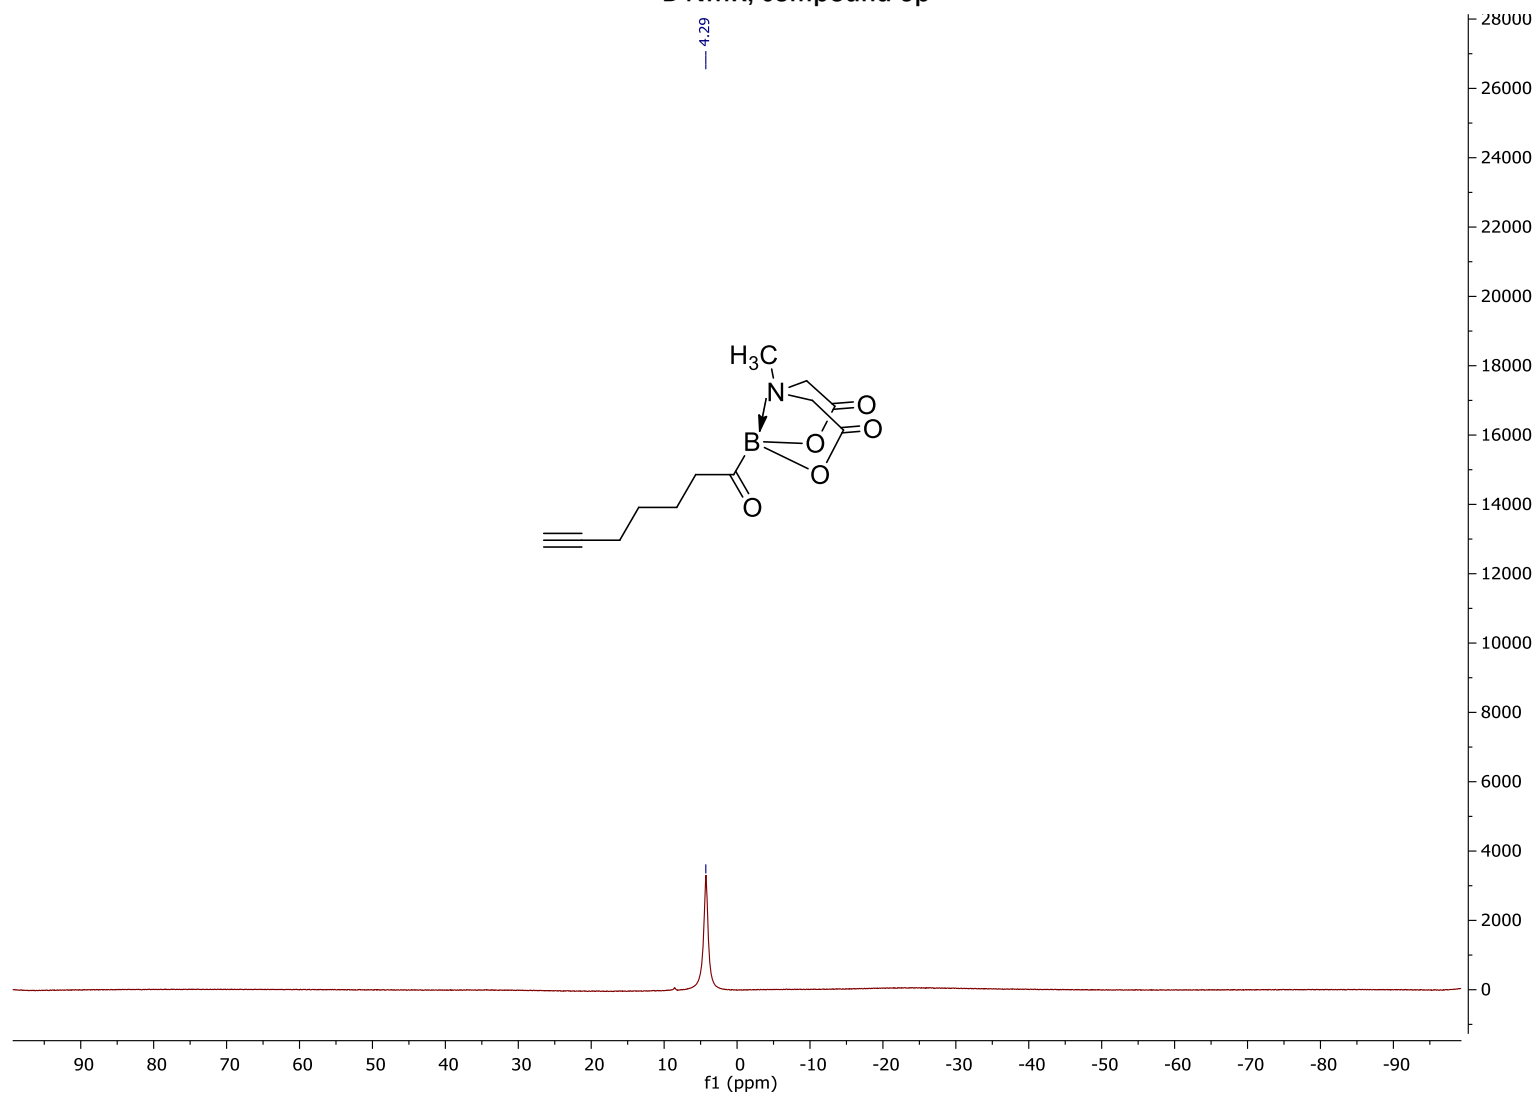

<sup>1</sup>H NMR, compound 5q

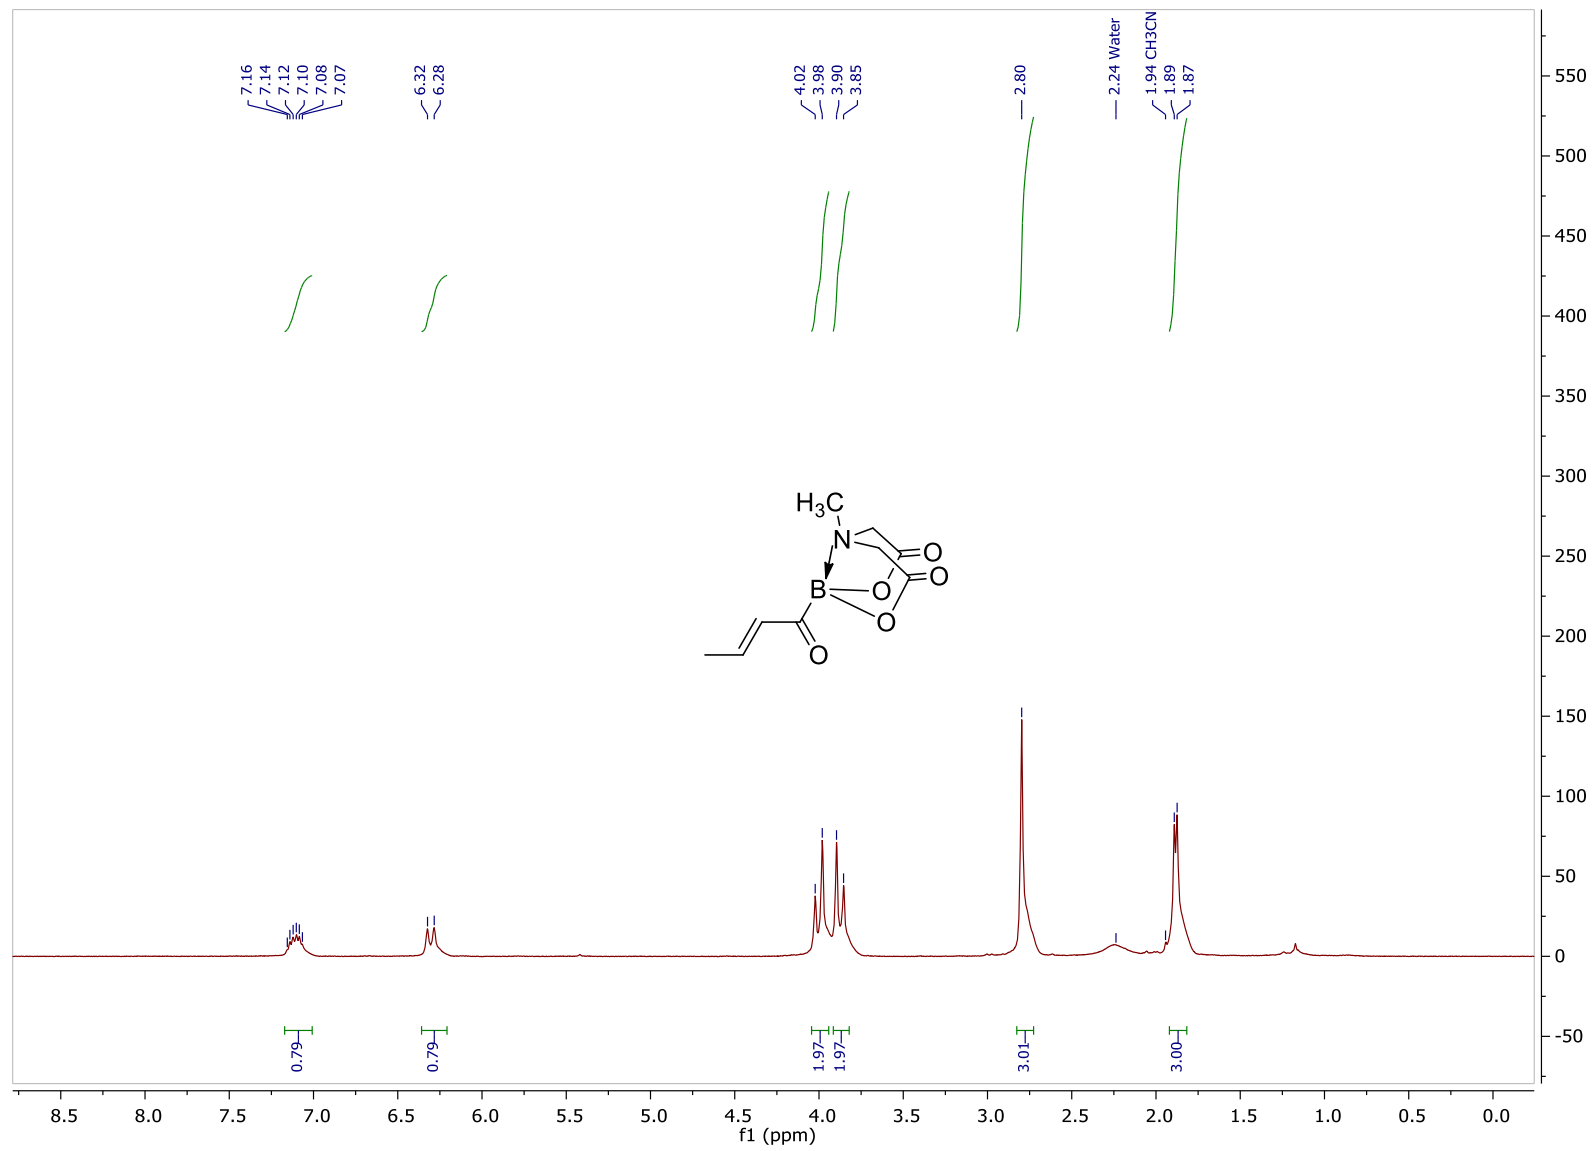

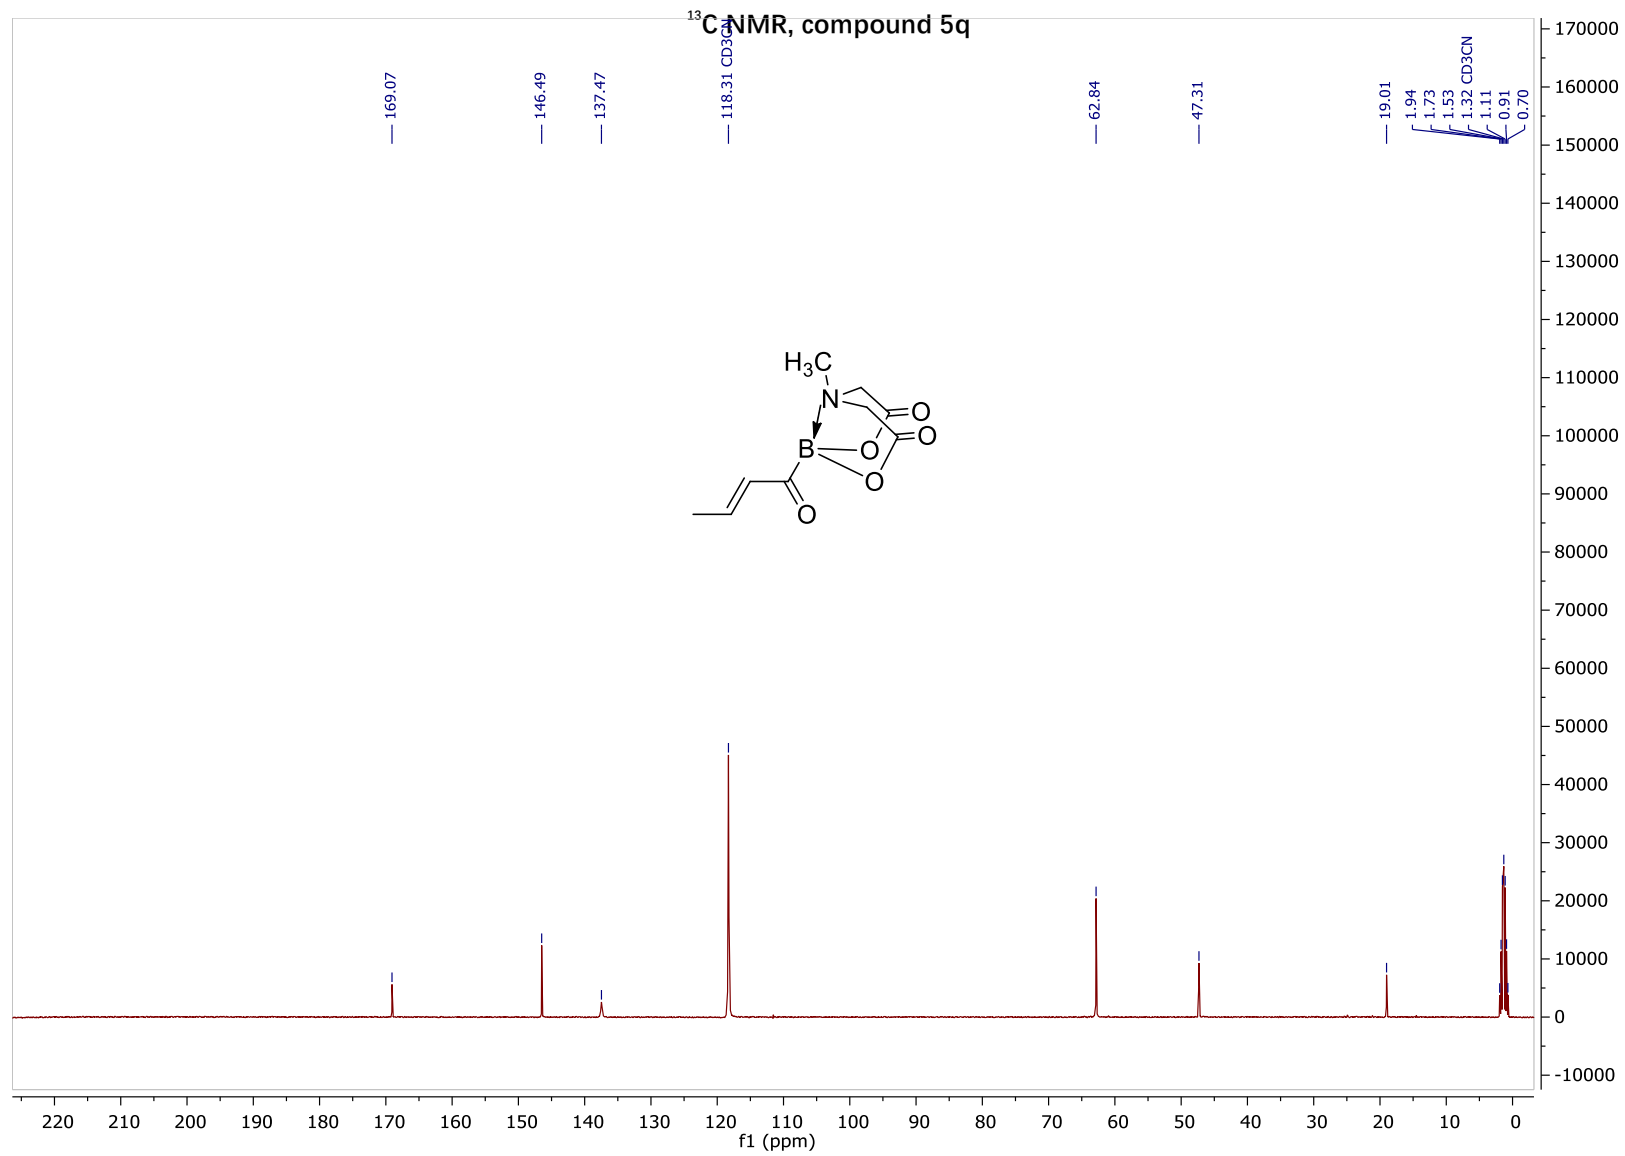

<sup>11</sup>B NMR, compound 5q

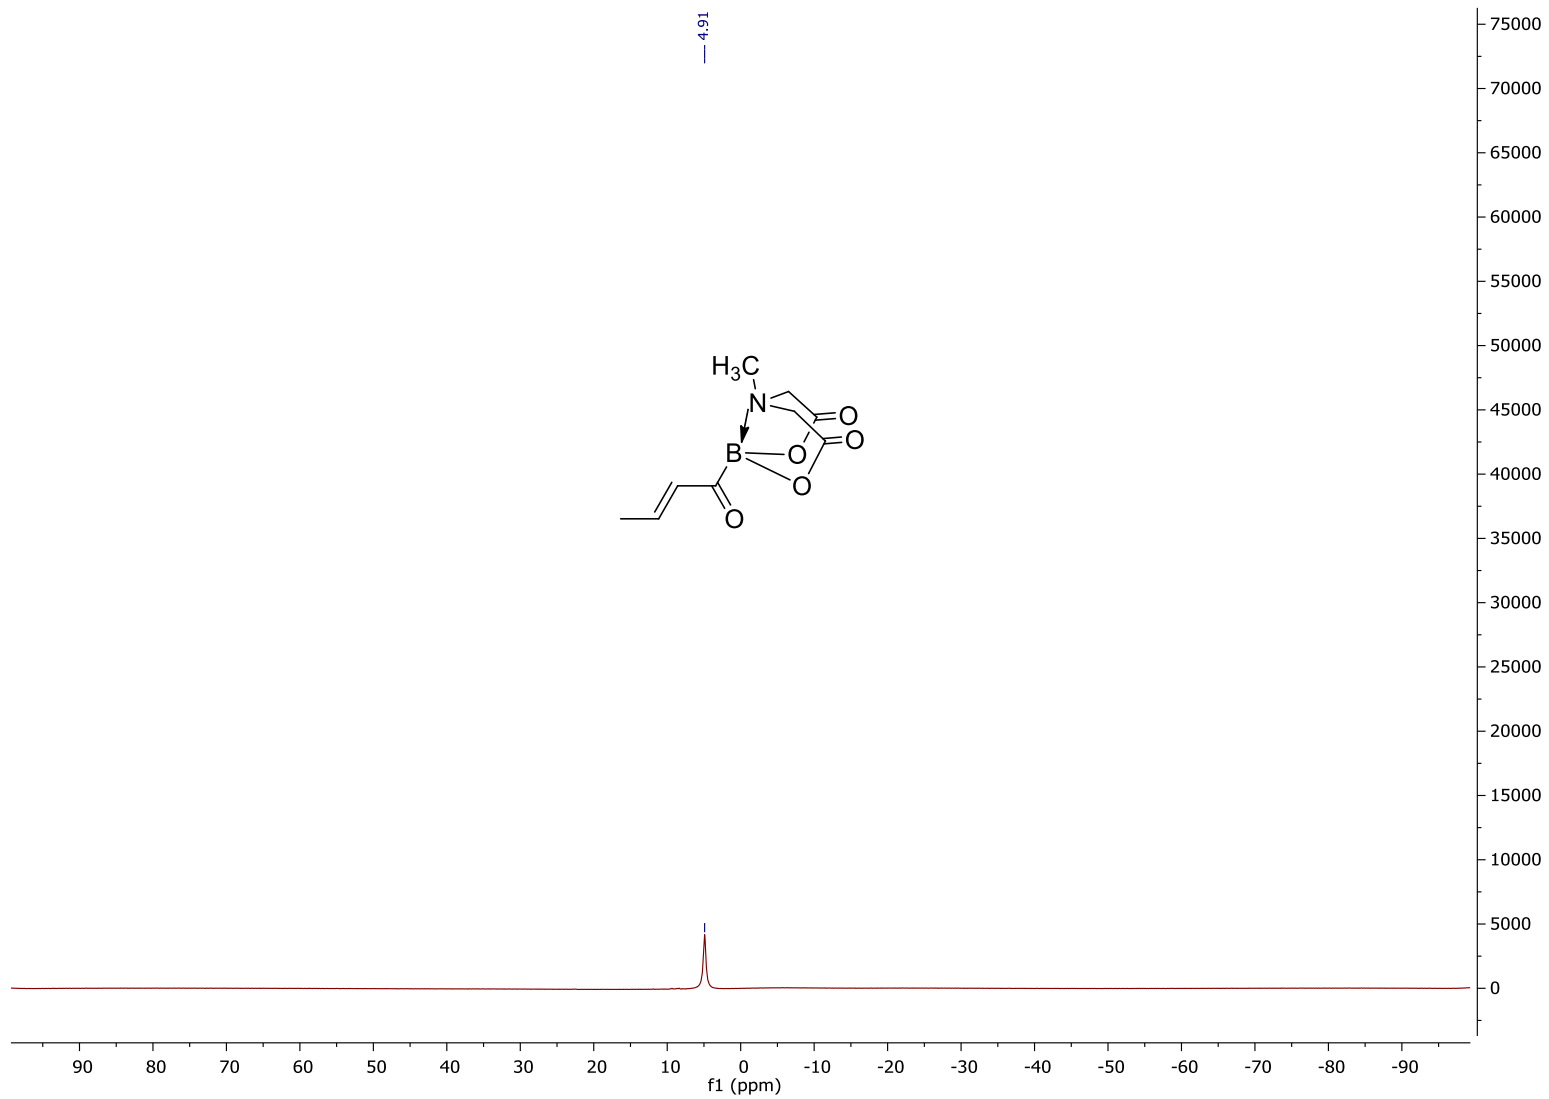

<sup>1</sup>H NMR, compound 5s

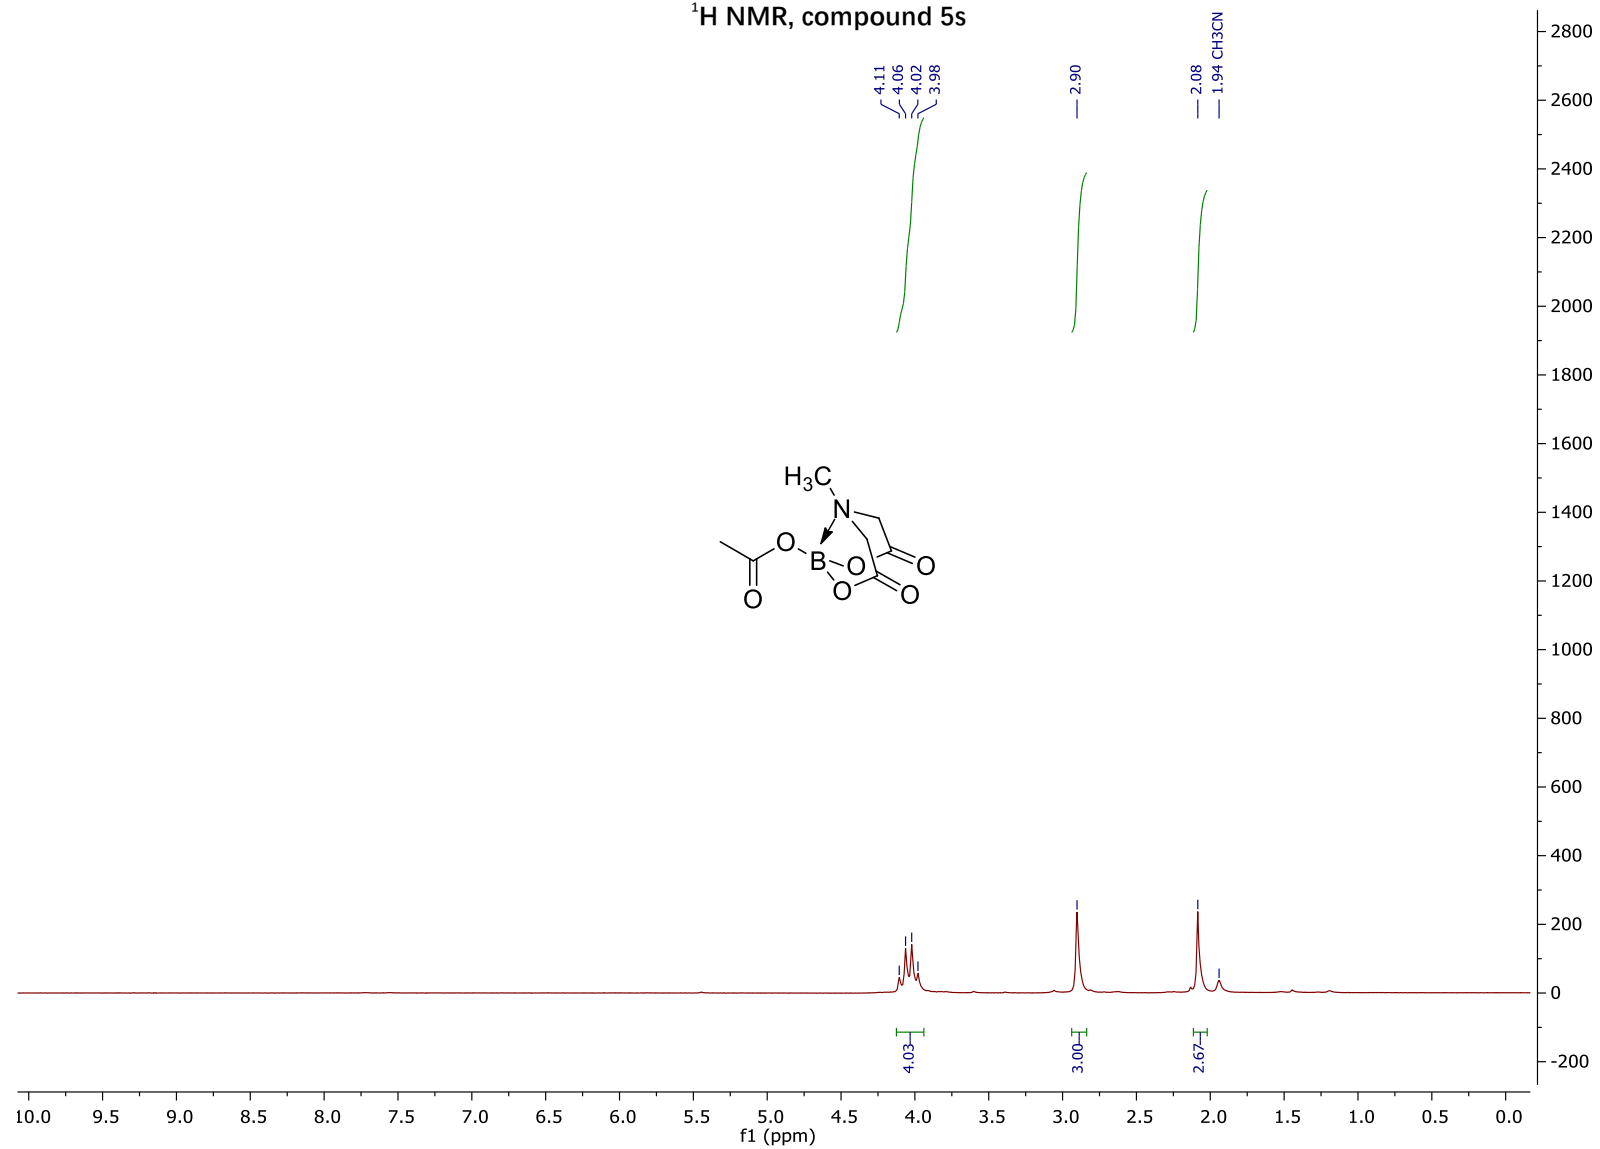

<sup>13</sup>C NMR, compound 5s

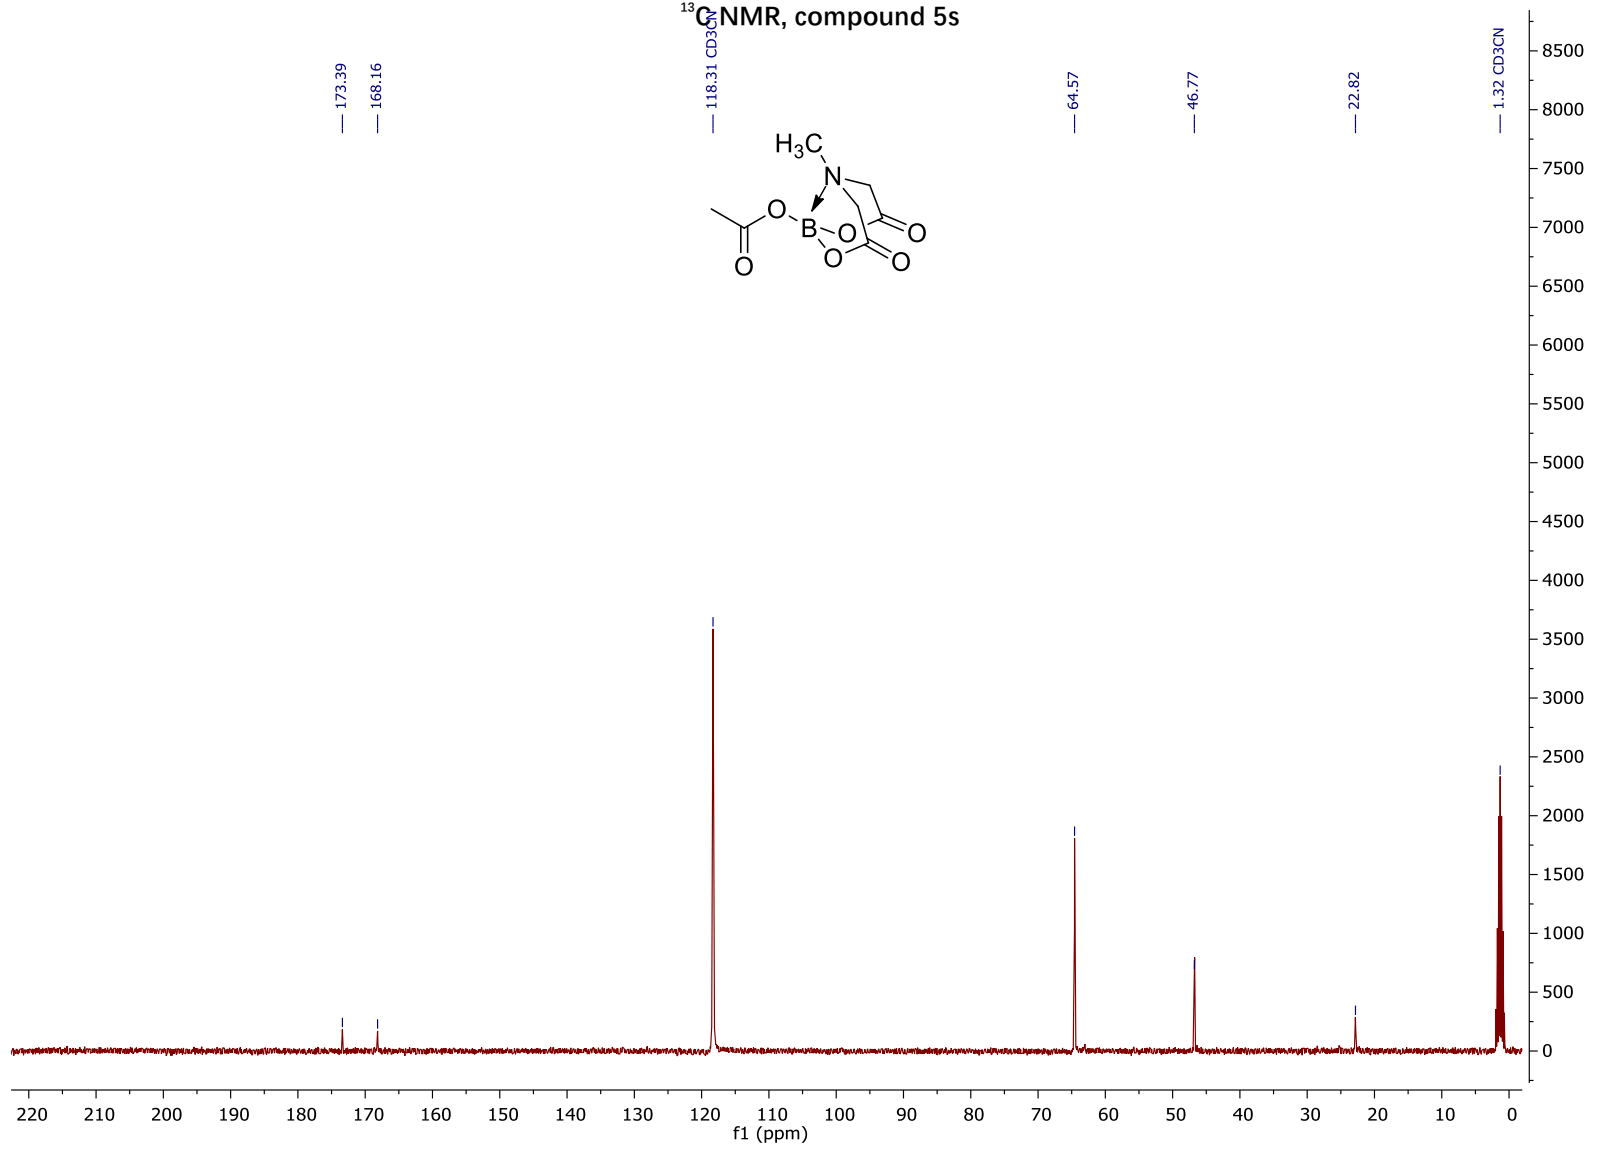



<sup>11</sup>B NMR, compound 5s

8.33

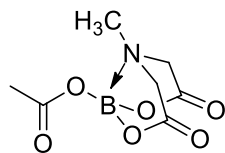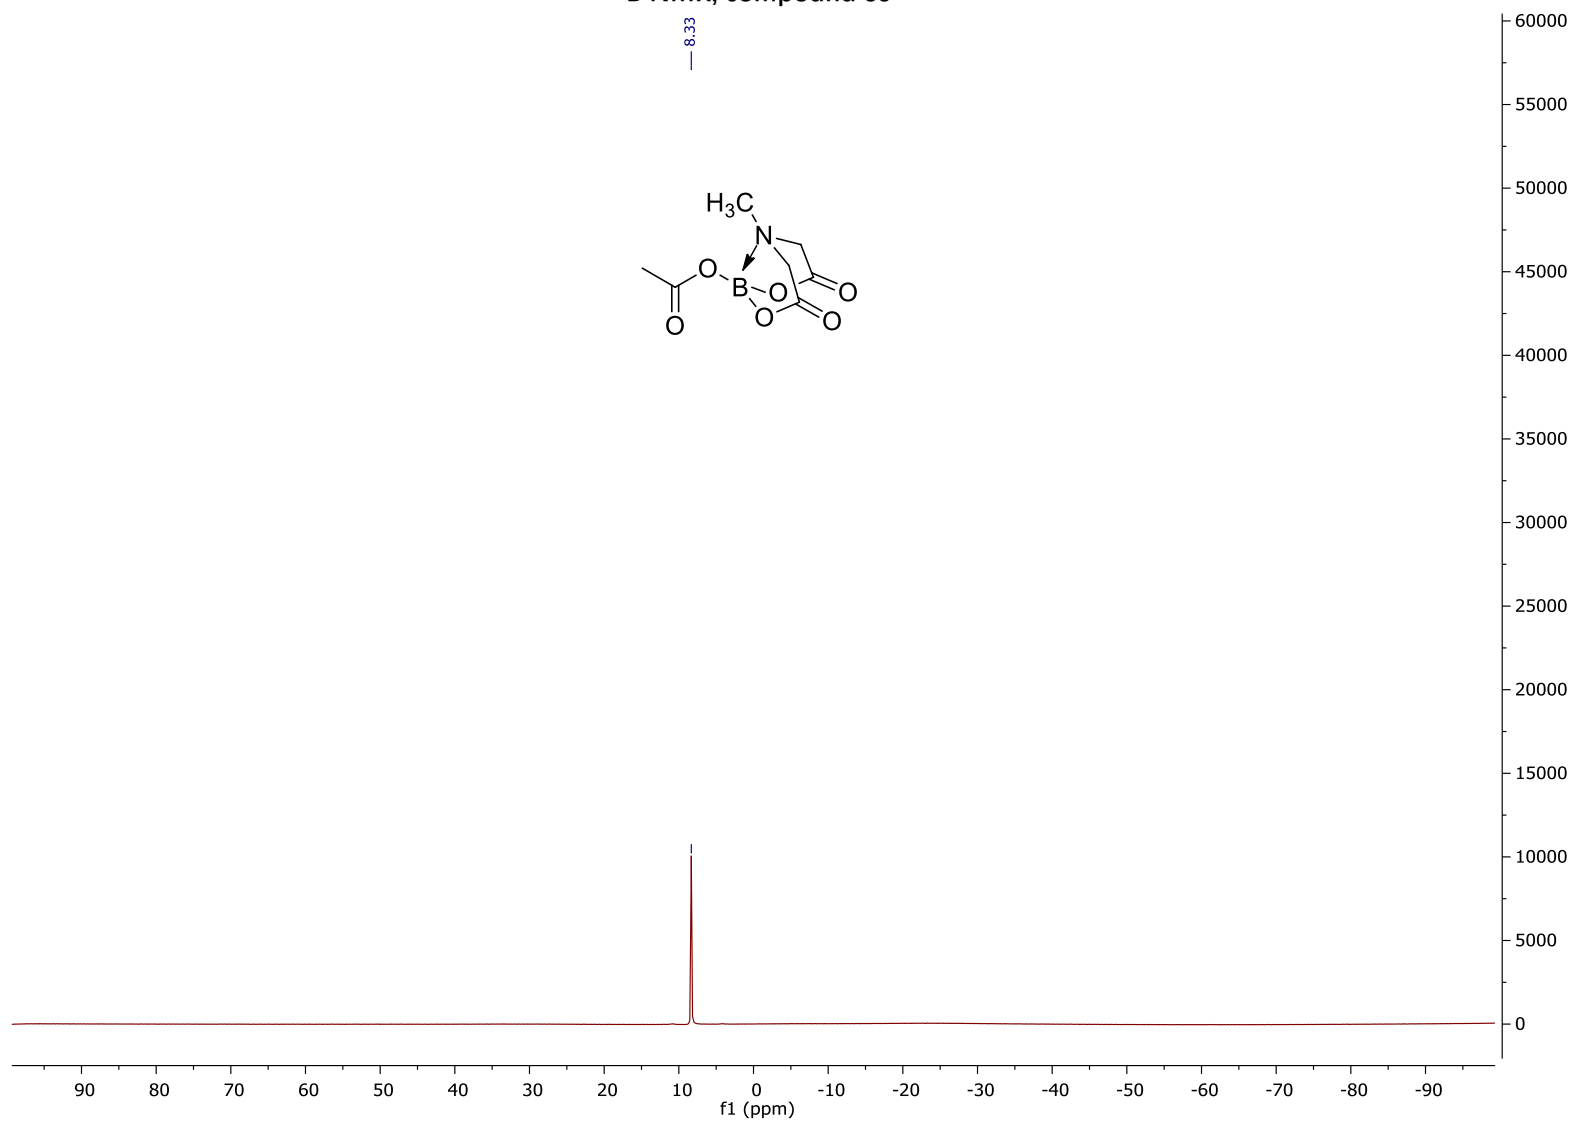

Supplement: SC-010-C9SC00378A-s001.pdf [file SC-010-C9SC00378A-s001.pdf]
